# Supplementary material for: Infernape uncovers cell type–specific and spatially resolved alternative polyadenylation in the brain
Source: HighWire-hosted journal article supplement (doi:10.1101/gr.277864.123), 2023-10-01
Supplement: Supplemental_Tables.zip [file Supplemental_Table_S0_summary.xlsx]

## Sheet: Sheet1
	name	contents	related figure	n.sheets
	Supplemental_Table_S1	De Novo PAs identified in the E14.5 mouse brain scRNA-seq data	Figure 1	1
	Supplemental_Table_S2	E14.5 RGC vs Neuron	Figure 2	3
	Supplemental_Table_S3	E18.5 sc	Figure 3	9
	Supplemental_Table_S4	E18.5 sn	Figure 3	9
	Supplemental_Table_S5	E18.5 sc vs sn, Glu and RGC	Figure 3	6
	Supplemental_Table_S6	developing mouse brain gene level test	Figure 4	9
	Supplemental_Table_S7	developing mouse brain within-UTR level test	Figure 4	9
	Supplemental_Table_S8	developing mouse brain across-UTR level test	Figure 4	9
	Supplemental_Table_S9	WARM values in Fig.4D, S4I	Figure 4	2
	Supplemental_Table_S10	gene ontology by DAVID	Figure 4	2
	Supplemental_Table_S11	RBP APA correlation	Figure 5	1
	Supplemental_Table_S12	cell type hierarchy for adult mouse brain data	Figure 6	1
	Supplemental_Table_S13	Adult mouse brain within-UTR level test, level 0-3	Figure 6	15
	Supplemental_Table_S14	WARM values in Fig.6D	Figure 6	1
	Supplemental_Table_S15	gene-level test for TEGLU clusters	Figure 7	9
	Supplemental_Table_S16	gene-level test for TEINH clusters	Figure 7	8
	Supplemental_Table_S17	WARM values in Fig.7A-B	Figure 7	2
	Supplemental_Table_S18	annotation for clusters in TEGLU and TEINH	Figure 7	1
