# Supplementary material for: Infernape uncovers cell type–specific and spatially resolved alternative polyadenylation in the brain
Source: HighWire-hosted journal article supplement (doi:10.1101/gr.277864.123), 2023-10-01
Supplement: Supplemental_Tables.zip [file Supplemental_Table_S1.xlsx]

## Sheet: De Novo PA
De Novo PAs identified in the E14.5 mouse brain scRNA-seq data
mode.pos	gene	seq	strand	gene.start	gene.end	mu	sigma	pi	from	to	width.fit	polyA_ID	cluster_ID	lb.center	ub.center	PAS_full	n_PAS	crude.start	crude.end	pA_motif_TTTAAA	pA_motif_TATAAA	pA_motif_GATAAA	pA_motif_CATAAA	pA_motif_ATTAAA	pA_motif_AGTAAA	pA_motif_ACTAAA	pA_motif_AATGAA	pA_motif_AATATA	pA_motif_AATAAA	pA_motif_AAGAAA	pA_motif_AACAAA	pA_stretch	PAS	TTTAAA	TATAAA	GATAAA	CATAAA	ATTAAA	AGTAAA	ACTAAA	AATGAA	AATATA	AATAAA	AAGAAA	AACAAA	motif	As	novel
72349796	0610030E20Rik	chr6	+	72347334	72353160	7.23498e+07	57.4993	1	72349623	72349968	345	0610030E20Rik:chr6:72349623-72349968:+	0610030E20Rik:2	72349796	72350096		NA	72349496	72350096	NA	NA	NA	NA	NA	NA	268	NA	NA	NA	NA	170175	NA	FALSE	NA	NA	NA	NA	NA	NA	FALSE	NA	NA	NA	NA	TRUE	TRUE	NA	TRUE
41505579	1110017D15Rik	chr4	-	41505009	41517333	4.15056e+07	24.664	0.418681	41505528	41505676	148	1110017D15Rik:chr4:41505528-41505676:-	1110017D15Rik:1	41505279	41505579	11	1	41505279	41505879	NA	NA	NA	NA	130	NA	NA	NA	NA	NA	NA	NA	NA	FALSE	NA	NA	NA	NA	TRUE	NA	NA	NA	NA	NA	NA	NA	TRUE	NA	TRUE
68871817	1110032F04Rik	chr3	+	68869586	68872163	6.88718e+07	109.502	0.246884	68871509	68872163	654	1110032F04Rik:chr3:68871509-68872163:+	1110032F04Rik:1	68871817	68872117	270	1	68871517	68872117	165192269	NA	NA	NA	NA	NA	NA	NA	NA	250	86135	NA	NA	FALSE	TRUE	NA	NA	NA	NA	NA	NA	NA	NA	FALSE	TRUE	NA	TRUE	NA	TRUE
47411502	1700001C19Rik	chr17	-	47408851	47437375	4.74115e+07	71.09	0.267386	47411301	47411727	426	1700001C19Rik:chr17:47411301-47411727:-	1700001C19Rik:1	47411202	47411502		NA	47411202	47411802	86	NA	NA	79	135	NA	NA	NA	NA	NA	NA	40	NA	FALSE	FALSE	NA	NA	FALSE	TRUE	NA	NA	NA	NA	NA	NA	FALSE	TRUE	NA	TRUE
8860007	1810013L24Rik	chr16	+	8830100	8864258	8.86001e+06	36.3907	1	8859899	8860117	218	1810013L24Rik:chr16:8859899-8860117:+	1810013L24Rik:10	8860007	8860307		NA	8859707	8860307	NA	NA	NA	NA	272	NA	NA	NA	NA	276	NA	87,92	NA	FALSE	NA	NA	NA	NA	FALSE	NA	NA	NA	NA	FALSE	NA	TRUE	TRUE	NA	TRUE
8862847	1810013L24Rik	chr16	+	8830100	8864258	8.8628e+06	45.3736	0.818338	8862666	8862938	272	1810013L24Rik:chr16:8862666-8862938:+	1810013L24Rik:12	8862847	8863147	97	1	8862547	8863147	117	NA	NA	60	71	292	NA	NA	NA	75	NA	NA	NA	FALSE	TRUE	NA	NA	FALSE	FALSE	FALSE	NA	NA	NA	FALSE	NA	NA	TRUE	NA	TRUE
12320818	1810049J17Rik	chr15	-	12318342	12321899	1.2321e+07	38.7908	0.0550131	12320920	12321153	233	1810049J17Rik:chr15:12320920-12321153:-	1810049J17Rik:1	12320518	12320818		NA	12320518	12321118	141	NA	NA	NA	NA	NA	NA	NA	NA	146	NA	NA	NA	FALSE	TRUE	NA	NA	NA	NA	NA	NA	NA	NA	TRUE	NA	NA	TRUE	NA	TRUE
124291982	2010315B03Rik	chr9	-	124291804	124312696	1.24292e+08	72.7982	1	124291804	124292196	392	2010315B03Rik:chr9:124291804-124292196:-	2010315B03Rik:1	124291804	124291982		NA	124291682	124292282	NA	NA	NA	NA	NA	NA	NA	NA	NA	152	170	NA	NA	FALSE	NA	NA	NA	NA	NA	NA	NA	NA	NA	TRUE	TRUE	NA	TRUE	NA	TRUE
77193682	2210408I21Rik	chr13	+	77135540	77613789	77193682	124.899	0.187412	77193307	77194056	749	2210408I21Rik:chr13:77193307-77194056:+	2210408I21Rik:8	77193682	77193982	32252	2	77193382	77193982	82149274	NA	NA	130	157	NA	NA	NA	NA	9119124164183230	243	NA	NA	FALSE	TRUE	NA	NA	TRUE	TRUE	NA	NA	NA	NA	TRUE	FALSE	NA	TRUE	NA	TRUE
77193826	2210408I21Rik	chr13	+	77135540	77613789	77193826	53.4824	0.0691389	77193665	77193986	321	2210408I21Rik:chr13:77193665-77193986:+	2210408I21Rik:8	77193826	77194126	108250	2	77193526	77194126	5130275	NA	155	NA	13	NA	NA	NA	NA	20,39,89,234	99	NA	NA	FALSE	TRUE	NA	TRUE	NA	FALSE	NA	NA	NA	NA	FALSE	TRUE	NA	TRUE	NA	TRUE
176235686	2210418O10Rik	chr2	+	176226569	176240330	176235686	52.8932	0.696218	176235527	176235844	317	2210418O10Rik:chr2:176235527-176235844:+	2210418O10Rik:2	176235686	176235986	29	1	176235386	176235986	72254	NA	NA	NA	154	91	NA	NA	NA	NA	65,95	NA	NA	FALSE	FALSE	NA	NA	NA	TRUE	TRUE	NA	NA	NA	NA	TRUE	NA	TRUE	NA	TRUE
176238405	2210418O10Rik	chr2	+	176226569	176240330	1.76238e+08	173.548	0.519803	176237901	176238942	1041	2210418O10Rik:chr2:176237901-176238942:+	2210418O10Rik:4	176238405	176238705		NA	176238105	176238705	153	NA	NA	NA	NA	NA	NA	NA	67	NA	55118	NA	NA	FALSE	TRUE	NA	NA	NA	NA	NA	NA	NA	FALSE	NA	TRUE	NA	TRUE	NA	TRUE
176239434	2210418O10Rik	chr2	+	176226569	176240330	1.76239e+08	95.9529	0.239059	176239107	176239683	576	2210418O10Rik:chr2:176239107-176239683:+	2210418O10Rik:5	176239434	176239734		NA	176239134	176239734	271290	NA	NA	NA	NA	26	NA	NA	NA	116	NA	NA	NA	FALSE	FALSE	NA	NA	NA	NA	FALSE	NA	NA	NA	TRUE	NA	NA	TRUE	NA	TRUE
176240034	2210418O10Rik	chr2	+	176226569	176240330	1.7624e+08	127.664	0.15054	176239609	176240330	721	2210418O10Rik:chr2:176239609-176240330:+	2210418O10Rik:5	176240034	176240330	294	1	176239734	176240334	NA	145	NA	NA	NA	40	NA	274	NA	266282	44270278	154	NA	FALSE	NA	TRUE	NA	NA	NA	FALSE	NA	FALSE	NA	FALSE	FALSE	TRUE	TRUE	NA	TRUE
18839633	2510002D24Rik	chr16	+	18836578	18840841	1.88397e+07	115.088	0.578992	18839324	18840015	691	2510002D24Rik:chr16:18839324-18840015:+	2510002D24Rik:2	18839633	18839933		NA	18839333	18839933	NA	NA	NA	NA	NA	NA	NA	NA	NA	NA	118	NA	2.82283e+26	FALSE	NA	NA	NA	NA	NA	NA	NA	NA	NA	NA	TRUE	NA	TRUE	FALSE	TRUE
21649817	2510009E07Rik	chr16	-	21649045	21694665	2.16498e+07	104.973	1	21649524	21650154	630	2510009E07Rik:chr16:21649524-21650154:-	2510009E07Rik:2	21649517	21649817	74	1	21649517	21650117	NA	NA	NA	NA	NA	155	NA	NA	NA	NA	NA	38	NA	FALSE	NA	NA	NA	NA	NA	TRUE	NA	NA	NA	NA	NA	FALSE	TRUE	NA	TRUE
79064695	2610008E11Rik	chr10	-	79064374	79097600	7.90647e+07	87.1919	0.100493	79064400	79064923	523	2610008E11Rik:chr10:79064400-79064923:-	2610008E11Rik:1	79064395	79064695		NA	79064395	79064995	121	NA	NA	NA	NA	NA	NA	184	NA	NA	168	NA	NA	FALSE	TRUE	NA	NA	NA	NA	NA	NA	FALSE	NA	NA	TRUE	NA	TRUE	NA	TRUE
79068721	2610008E11Rik	chr10	-	79064374	79097600	7.90687e+07	10.2333	1	79068686	79068747	61	2610008E11Rik:chr10:79068686-79068747:-	2610008E11Rik:3	79068421	79068721		NA	79068421	79069021	NA	NA	NA	NA	134	92	NA	NA	NA	NA	NA	NA	NA	FALSE	NA	NA	NA	NA	TRUE	TRUE	NA	NA	NA	NA	NA	NA	TRUE	NA	TRUE
129216861	2610044O15Rik8	chr8	-	129216354	129234046	1.29217e+08	148.611	0.111439	129216415	129217307	892	2610044O15Rik8:chr8:129216415-129217307:-	2610044O15Rik8:1	129216561	129216861	253	1	129216561	129217161	48	60155	NA	NA	NA	NA	NA	NA	NA	179222	NA	NA	NA	FALSE	FALSE	TRUE	NA	NA	NA	NA	NA	NA	NA	TRUE	NA	NA	TRUE	NA	TRUE
129219120	2610044O15Rik8	chr8	-	129216354	129234046	1.29219e+08	146.404	1	129218713	129219591	878	2610044O15Rik8:chr8:129218713-129219591:-	2610044O15Rik8:2	129218820	129219120		NA	129218820	129219420	115	267	NA	58142	NA	NA	NA	NA	258	NA	163	NA	NA	FALSE	TRUE	FALSE	NA	TRUE	NA	NA	NA	NA	FALSE	NA	TRUE	NA	TRUE	NA	TRUE
108781129	3110021N24Rik	chr4	+	108719649	108785334	1.08781e+08	84.242	0.424933	108780840	108781345	505	3110021N24Rik:chr4:108780840-108781345:+	3110021N24Rik:2	108781129	108781429		NA	108780829	108781429	184	NA	37237	NA	NA	NA	NA	NA	NA	NA	255	1.52159e+17	NA	FALSE	FALSE	NA	FALSE	NA	NA	NA	NA	NA	NA	NA	FALSE	TRUE	TRUE	NA	TRUE
108784731	3110021N24Rik	chr4	+	108719649	108785334	1.08785e+08	36.6106	1	108784627	108784847	220	3110021N24Rik:chr4:108784627-108784847:+	3110021N24Rik:3	108784731	108785031	67	1	108784431	108785031	NA	50121132	NA	105164	NA	NA	NA	NA	241	54,59,188	76	NA	NA	FALSE	NA	TRUE	NA	TRUE	NA	NA	NA	NA	FALSE	FALSE	FALSE	NA	TRUE	NA	TRUE
81783040	3110040N11Rik	chr7	-	81779068	81789478	8.17831e+07	22.9883	1	81782985	81783123	138	3110040N11Rik:chr7:81782985-81783123:-	3110040N11Rik:4	81782740	81783040	10	1	81782740	81783340	NA	NA	NA	NA	145	NA	113	NA	NA	NA	NA	NA	NA	FALSE	NA	NA	NA	NA	TRUE	NA	TRUE	NA	NA	NA	NA	NA	TRUE	NA	TRUE
30103728	3110082J24Rik	chr5	-	30103584	30106086	3.01037e+07	59.643	1	30103584	30103908	324	3110082J24Rik:chr5:30103584-30103908:-	3110082J24Rik:1	30103584	30103728		NA	30103428	30104028	NA	NA	NA	NA	NA	NA	NA	NA	NA	127	NA	NA	NA	FALSE	NA	NA	NA	NA	NA	NA	NA	NA	NA	TRUE	NA	NA	TRUE	NA	TRUE
12302800	3830406C13Rik	chr14	+	12284173	12306869	1.23028e+07	65.4929	0.0174637	12302561	12302954	393	3830406C13Rik:chr14:12302561-12302954:+	3830406C13Rik:5	12302800	12303100	2.37286e+17	6	12302500	12303100	66	NA	NA	95	208275	21	NA	107	NA	NA	NA	NA	NA	FALSE	FALSE	NA	NA	TRUE	FALSE	FALSE	NA	TRUE	NA	NA	NA	NA	TRUE	NA	TRUE
3886293	4921536K21Rik	chr11	-	3886088	3895098	3.88629e+06	55.2642	1	3886122	3886453	331	4921536K21Rik:chr11:3886122-3886453:-	4921536K21Rik:1	3886088	3886293	205	1	3885993	3886593	119	NA	NA	NA	NA	NA	NA	NA	NA	184	NA	NA	NA	FALSE	TRUE	NA	NA	NA	NA	NA	NA	NA	NA	FALSE	NA	NA	TRUE	NA	TRUE
130708274	4930402H24Rik	chr2	-	130706199	130840145	1.30708e+08	111.37	0.420009	130707779	130708447	668	4930402H24Rik:chr2:130707779-130708447:-	4930402H24Rik:2	130707974	130708274	254210	2	130707974	130708574	NA	NA	NA	NA	NA	30	226	221	185	180	265	NA	NA	FALSE	NA	NA	NA	NA	NA	FALSE	FALSE	FALSE	FALSE	TRUE	FALSE	NA	TRUE	NA	TRUE
130803724	4930402H24Rik	chr2	-	130706199	130840145	1.30804e+08	95.8885	0.143419	130803389	130803965	576	4930402H24Rik:chr2:130803389-130803965:-	4930402H24Rik:29	130803424	130803724	44	1	130803424	130804024	NA	136	NA	NA	NA	NA	NA	NA	NA	NA	38257	NA	NA	FALSE	NA	TRUE	NA	NA	NA	NA	NA	NA	NA	NA	FALSE	NA	TRUE	NA	TRUE
130804356	4930402H24Rik	chr2	-	130706199	130840145	1.30804e+08	58.9064	1	130804190	130804544	354	4930402H24Rik:chr2:130804190-130804544:-	4930402H24Rik:30	130804056	130804356		NA	130804056	130804656	NA	NA	NA	NA	NA	NA	133	NA	NA	156	168	145	NA	FALSE	NA	NA	NA	NA	NA	NA	TRUE	NA	NA	TRUE	TRUE	TRUE	TRUE	NA	TRUE
5058854	4930555G01Rik	chr14	+	5050629	5059243	5.05882e+06	24.6703	0.259199	5058741	5058889	148	4930555G01Rik:chr14:5058741-5058889:+	4930555G01Rik:1	5058854	5059154		NA	5058554	5059154	NA	NA	NA	NA	128	NA	NA	NA	203	153236	NA	NA	NA	FALSE	NA	NA	NA	NA	TRUE	NA	NA	NA	FALSE	TRUE	NA	NA	TRUE	NA	TRUE
5058939	4930555G01Rik	chr14	+	5050629	5059243	5.05891e+06	55.748	0.740801	5058741	5059076	335	4930555G01Rik:chr14:5058741-5059076:+	4930555G01Rik:1	5058939	5059239		NA	5058639	5059239	NA	285	NA	NA	43	NA	NA	NA	118	68151	NA	296	NA	FALSE	NA	FALSE	NA	NA	FALSE	NA	NA	NA	TRUE	TRUE	NA	FALSE	TRUE	NA	TRUE
72216538	4930563E22Rik	chr11	+	72215138	72218450	7.22165e+07	54.5442	0.565853	72216367	72216694	327	4930563E22Rik:chr11:72216367-72216694:+	4930563E22Rik:1	72216538	72216838		NA	72216238	72216838	128	NA	NA	NA	NA	254	NA	NA	NA	NA	192	197	NA	FALSE	TRUE	NA	NA	NA	NA	FALSE	NA	NA	NA	NA	FALSE	FALSE	TRUE	NA	TRUE
72217446	4930563E22Rik	chr11	+	72215138	72218450	7.22175e+07	77.9052	1	72217235	72217703	468	4930563E22Rik:chr11:72217235-72217703:+	4930563E22Rik:2	72217446	72217746	297	1	72217146	72217746	NA	NA	188	NA	NA	NA	NA	NA	NA	180274	4	196200269	NA	FALSE	NA	NA	FALSE	NA	NA	NA	NA	NA	NA	TRUE	FALSE	FALSE	TRUE	NA	TRUE
109675650	5430403G16Rik	chr5	-	109674544	109691041	1.09676e+08	105.335	0.176662	109675426	109676058	632	5430403G16Rik:chr5:109675426-109676058:-	5430403G16Rik:2	109675350	109675650		NA	109675350	109675950	NA	NA	NA	25	NA	NA	NA	NA	NA	NA	180	184226230	229230231	FALSE	NA	NA	NA	FALSE	NA	NA	NA	NA	NA	NA	TRUE	FALSE	TRUE	FALSE	TRUE
80362781	5730455P16Rik	chr11	-	80360458	80378015	8.03628e+07	46.0874	0.181543	80362636	80362912	276	5730455P16Rik:chr11:80362636-80362912:-	5730455P16Rik:2	80362481	80362781	228	1	80362481	80363081	NA	NA	147	NA	NA	NA	69	NA	202228	190	4,9,28,178	NA	NA	FALSE	NA	NA	TRUE	NA	NA	NA	FALSE	NA	FALSE	FALSE	TRUE	NA	TRUE	NA	TRUE
80362832	5730455P16Rik	chr11	-	80360458	80378015	8.03631e+07	47.8493	0.0998375	80362918	80363206	288	5730455P16Rik:chr11:80362918-80363206:-	5730455P16Rik:2	80362532	80362832	279	1	80362532	80363132	NA	NA	198	29	NA	NA	120	NA	253279	241	51,55,60,79,229	NA	NA	FALSE	NA	NA	FALSE	FALSE	NA	NA	TRUE	NA	FALSE	FALSE	FALSE	NA	TRUE	NA	TRUE
80362968	5730455P16Rik	chr11	-	80360458	80378015	8.03629e+07	50.9506	0.385598	80362793	80363098	305	5730455P16Rik:chr11:80362793-80363098:-	5730455P16Rik:2	80362668	80362968		NA	80362668	80363268	NA	NA	NA	165	NA	NA	256	NA	NA	NA	187191196215	NA	NA	FALSE	NA	NA	NA	TRUE	NA	NA	FALSE	NA	NA	NA	FALSE	NA	TRUE	NA	TRUE
62604294	6720489N17Rik	chr13	-	62602994	62624182	6.26043e+07	63.1391	0.127933	62604110	62604489	379	6720489N17Rik:chr13:62604110-62604489:-	6720489N17Rik:1	62603994	62604294	39,39	2	62603994	62604594	176	NA	NA	14	63	NA	NA	NA	NA	184	NA	NA	NA	FALSE	TRUE	NA	NA	FALSE	FALSE	NA	NA	NA	NA	FALSE	NA	NA	TRUE	NA	TRUE
77631812	8030462N17Rik	chr18	-	77631467	77713933	7.76318e+07	43.8179	0.213141	77631675	77631938	263	8030462N17Rik:chr18:77631675-77631938:-	8030462N17Rik:1	77631512	77631812	285	1	77631512	77632112	NA	NA	292	270	NA	NA	NA	129	NA	NA	NA	75	NA	FALSE	NA	NA	FALSE	FALSE	NA	NA	NA	TRUE	NA	NA	NA	FALSE	TRUE	NA	TRUE
14991396	9030025P20Rik	chr17	+	14978468	14991577	1.49914e+07	79.4189	0.614614	14991171	14991577	406	9030025P20Rik:chr17:14991171-14991577:+	9030025P20Rik:7	14991396	14991577		NA	14991096	14991696	NA	NA	NA	161	NA	NA	NA	NA	NA	NA	NA	NA	NA	FALSE	NA	NA	NA	TRUE	NA	NA	NA	NA	NA	NA	NA	NA	TRUE	NA	TRUE
29228117	9330159F19Rik	chr10	+	29211606	29230791	2.92283e+07	147.017	0.114621	29227832	29228714	882	9330159F19Rik:chr10:29227832-29228714:+	9330159F19Rik:8	29228117	29228417	58	1	29227817	29228417	NA	NA	NA	NA	20	NA	NA	125	145	286	NA	NA	NA	FALSE	NA	NA	NA	NA	FALSE	NA	NA	TRUE	TRUE	FALSE	NA	NA	TRUE	NA	TRUE
137387379	9430038I01Rik	chr7	-	137374815	137410762	137387379	26.5859	0.815508	137387299	137387458	159	9430038I01Rik:chr7:137387299-137387458:-	9430038I01Rik:5	137387079	137387379		NA	137387079	137387679	NA	201	NA	NA	NA	NA	74	115	NA	NA	NA	NA	NA	FALSE	NA	FALSE	NA	NA	NA	NA	FALSE	TRUE	NA	NA	NA	NA	TRUE	NA	TRUE
124944314	9930104L06Rik	chr4	+	124937074	124944694	1.24944e+08	117.405	0.270465	124944018	124944694	676	9930104L06Rik:chr4:124944018-124944694:+	9930104L06Rik:3	124944314	124944614	268	1	124944014	124944614	113173	NA	NA	NA	160	NA	NA	NA	NA	NA	119164	253	NA	FALSE	TRUE	NA	NA	NA	TRUE	NA	NA	NA	NA	NA	TRUE	FALSE	TRUE	NA	TRUE
83226932	A4galt	chr15	-	83226717	83251774	8.32269e+07	64.3356	1	83226717	83227101	384	A4galt:chr15:83226717-83227101:-	A4galt:1	83226717	83226932	209,52	2	83226632	83227232	134154	NA	NA	NA	35	NA	NA	NA	NA	191	NA	NA	NA	FALSE	TRUE	NA	NA	NA	FALSE	NA	NA	NA	NA	FALSE	NA	NA	TRUE	NA	TRUE
69210128	A930033H14Rik	chr10	-	69209240	69213098	6.92101e+07	102.582	0.525108	69209789	69210404	615	A930033H14Rik:chr10:69209789-69210404:-	A930033H14Rik:1	69209828	69210128		NA	69209828	69210428	NA	NA	NA	NA	NA	NA	NA	NA	NA	1.57161e+17	NA	NA	NA	FALSE	NA	NA	NA	NA	NA	NA	NA	NA	NA	TRUE	NA	NA	TRUE	NA	TRUE
69210619	A930033H14Rik	chr10	-	69209240	69213098	6.92106e+07	106.064	0.362099	69210292	69210929	637	A930033H14Rik:chr10:69210292-69210929:-	A930033H14Rik:1	69210319	69210619		NA	69210319	69210919	NA	NA	NA	NA	NA	NA	NA	NA	NA	166	203	NA	203204	FALSE	NA	NA	NA	NA	NA	NA	NA	NA	NA	TRUE	FALSE	NA	TRUE	FALSE	TRUE
86991583	Aak1	chr6	+	86849517	87003227	8.69916e+07	110.654	0.174018	86991243	86991907	664	Aak1:chr6:86991243-86991907:+	Aak1:18	86991583	86991883	273	1	86991283	86991883	NA	209	NA	NA	NA	170	NA	152184	NA	255	NA	226	NA	FALSE	NA	FALSE	NA	NA	NA	TRUE	NA	TRUE	NA	FALSE	NA	FALSE	TRUE	NA	TRUE
69237658	Abcb11	chr2	-	69235370	69342614	6.92376e+07	35.5205	1	69237541	69237754	213	Abcb11:chr2:69237541-69237754:-	Abcb11:1	69237358	69237658		NA	69237358	69237958	NA	NA	NA	NA	NA	129	NA	NA	NA	NA	NA	98106113	93,94,95,101,102	FALSE	NA	NA	NA	NA	NA	TRUE	NA	NA	NA	NA	NA	TRUE	TRUE	FALSE	TRUE
20402289	Abcc5	chr16	-	20329095	20426394	2.04023e+07	60.4746	1	20402126	20402489	363	Abcc5:chr16:20402126-20402489:-	Abcc5:12	20401989	20402289	29	1	20401989	20402589	138226	NA	124	117	NA	NA	NA	NA	NA	NA	NA	NA	NA	FALSE	TRUE	NA	TRUE	TRUE	NA	NA	NA	NA	NA	NA	NA	NA	TRUE	NA	TRUE
91149022	Abcd2	chr15	-	91145676	91191799	9.1149e+07	66.2054	0.60063	91148820	91149217	397	Abcd2:chr15:91148820-91149217:-	Abcd2:2	91148722	91149022		NA	91148722	91149322	NA	NA	NA	NA	NA	NA	NA	NA	177	NA	NA	196200204217	NA	FALSE	NA	NA	NA	NA	NA	NA	NA	NA	TRUE	NA	NA	FALSE	TRUE	NA	TRUE
84603005	Abcd4	chr12	-	84601721	84617413	8.4603e+07	43.7695	0.0417404	84602871	84603134	263	Abcd4:chr12:84602871-84603134:-	Abcd4:1	84602705	84603005		NA	84602705	84603305	NA	NA	NA	NA	NA	NA	NA	144	NA	NA	NA	NA	NA	FALSE	NA	NA	NA	NA	NA	NA	NA	TRUE	NA	NA	NA	NA	TRUE	NA	TRUE
70183780	Abhd12b	chr12	+	70154157	70183887	7.01838e+07	32.1891	0.90504	70183658	70183851	193	Abhd12b:chr12:70183658-70183851:+	Abhd12b:1	70183780	70183887	107	1	70183480	70184080	NA	NA	NA	NA	NA	NA	NA	NA	NA	103	NA	NA	NA	FALSE	NA	NA	NA	NA	NA	NA	NA	NA	NA	TRUE	NA	NA	TRUE	NA	TRUE
84109464	Abhd17c	chr7	-	84107676	84151893	8.41094e+07	29.4153	0.137545	84109336	84109513	177	Abhd17c:chr7:84109336-84109513:-	Abhd17c:1	84109164	84109464	106,8	2	84109164	84109764	NA	NA	NA	NA	NA	234	NA	NA	NA	87	150	NA	NA	FALSE	NA	NA	NA	NA	NA	FALSE	NA	NA	NA	FALSE	TRUE	NA	TRUE	NA	TRUE
40917170	Abhd18	chr3	+	40894145	40938138	40917170	86.3712	0.424235	40916910	40917429	519	Abhd18:chr3:40916910-40917429:+	Abhd18:9	40917170	40917470	250	1	40916870	40917470	NA	NA	NA	NA	217	120	NA	NA	NA	NA	NA	9.31001e+16	88,89	FALSE	NA	NA	NA	NA	FALSE	TRUE	NA	NA	NA	NA	NA	TRUE	TRUE	FALSE	TRUE
40918702	Abhd18	chr3	+	40894145	40938138	40918702	109.286	0.318719	40918374	40919029	655	Abhd18:chr3:40918374-40919029:+	Abhd18:10	40918702	40919002		NA	40918402	40919002	176	NA	NA	NA	49	NA	148	NA	NA	NA	141	114	NA	FALSE	TRUE	NA	NA	NA	FALSE	NA	TRUE	NA	NA	NA	TRUE	TRUE	TRUE	NA	TRUE
79360446	Abhd2	chr7	+	79273199	79365512	7.93605e+07	49.361	0.235347	79360373	79360670	297	Abhd2:chr7:79360373-79360670:+	Abhd2:8	79360446	79360746	12,46,70,233	4	79360146	79360746	NA	NA	NA	NA	NA	NA	NA	NA	NA	NA	149	213	NA	FALSE	NA	NA	NA	NA	NA	NA	NA	NA	NA	NA	TRUE	FALSE	TRUE	NA	TRUE
122381175	Abhd5	chr9	+	122351608	122381524	1.22381e+08	75.1648	0.0972879	122380974	122381425	451	Abhd5:chr9:122380974-122381425:+	Abhd5:3	122381175	122381475	205242300	3	122380875	122381475	NA	NA	NA	NA	178	225	NA	NA	NA	NA	79,98,116	NA	NA	FALSE	NA	NA	NA	NA	TRUE	FALSE	NA	NA	NA	NA	TRUE	NA	TRUE	NA	TRUE
8061392	Abhd6	chr14	+	8002902	8061710	8.0614e+06	93.4507	0.933043	8061124	8061685	561	Abhd6:chr14:8061124-8061685:+	Abhd6:10	8061392	8061692		NA	8061092	8061692	272	NA	NA	NA	296	NA	NA	205	NA	139	143155160165200	232	NA	FALSE	FALSE	NA	NA	NA	FALSE	NA	NA	FALSE	NA	TRUE	TRUE	FALSE	TRUE	NA	TRUE
8061444	Abhd6	chr14	+	8002902	8061710	8.06165e+06	31.4378	0.0669571	8061555	8061710	155	Abhd6:chr14:8061555-8061710:+	Abhd6:10	8061444	8061710	265	1	8061144	8061744	220	NA	NA	NA	244	NA	NA	153	NA	87	9.11031e+16	180	NA	FALSE	FALSE	NA	NA	NA	FALSE	NA	NA	TRUE	NA	FALSE	TRUE	TRUE	TRUE	NA	TRUE
22941606	Abi1	chr2	-	22940062	23040195	2.29415e+07	28.8009	0.0411722	22941423	22941596	173	Abi1:chr2:22941423-22941596:-	Abi1:2	22941306	22941606	291,206,101,49	4	22941306	22941906	141158	NA	NA	169	NA	NA	NA	276	189	NA	NA	8	NA	FALSE	TRUE	NA	NA	TRUE	NA	NA	NA	FALSE	FALSE	NA	NA	FALSE	TRUE	NA	TRUE
36090962	Acad9	chr3	+	36065979	36094727	3.60909e+07	48.5534	0.29109	36090780	36091072	292	Acad9:chr3:36090780-36091072:+	Acad9:4	36090962	36091262		NA	36090662	36091262	NA	NA	NA	NA	NA	280	63	NA	NA	NA	176180184	NA	NA	FALSE	NA	NA	NA	NA	NA	FALSE	FALSE	NA	NA	NA	TRUE	NA	TRUE	NA	TRUE
36091107	Acad9	chr3	+	36065979	36094727	3.6091e+07	36.1262	0.110323	36090895	36091112	217	Acad9:chr3:36090895-36091112:+	Acad9:4	36091107	36091407	278	1	36090807	36091407	NA	175258	NA	NA	NA	135	NA	NA	NA	NA	31,35,39,179	249	NA	FALSE	NA	TRUE	NA	NA	NA	TRUE	NA	NA	NA	NA	TRUE	FALSE	TRUE	NA	TRUE
36091180	Acad9	chr3	+	36065979	36094727	3.60912e+07	89.8187	0.224796	36090947	36091485	538	Acad9:chr3:36090947-36091485:+	Acad9:4	36091180	36091480	205277	2	36090880	36091480	269	102185	NA	NA	NA	62	NA	NA	NA	247	106	176	NA	FALSE	FALSE	TRUE	NA	NA	NA	FALSE	NA	NA	NA	FALSE	TRUE	TRUE	TRUE	NA	TRUE
36091738	Acad9	chr3	+	36065979	36094727	3.60917e+07	75.3925	0.178249	36091499	36091951	452	Acad9:chr3:36091499-36091951:+	Acad9:4	36091738	36092038	12	1	36091438	36092038	NA	NA	NA	NA	NA	154	NA	149	NA	165	NA	NA	NA	FALSE	NA	NA	NA	NA	NA	TRUE	NA	TRUE	NA	TRUE	NA	NA	TRUE	NA	TRUE
131445466	Acadsb	chr7	+	131410601	131451159	1.31445e+08	47.1864	0.0267616	131445354	131445637	283	Acadsb:chr7:131445354-131445637:+	Acadsb:11	131445466	131445766	214267214267	4	131445166	131445766	NA	202	NA	NA	229	NA	NA	NA	NA	247	100243	252	NA	FALSE	NA	FALSE	NA	NA	FALSE	NA	NA	NA	NA	FALSE	TRUE	FALSE	TRUE	NA	TRUE
180755317	Acbd3	chr1	+	180726043	180761008	1.80755e+08	84.4978	0.327207	180755060	180755567	507	Acbd3:chr1:180755060-180755567:+	Acbd3:10	180755317	180755617		NA	180755017	180755617	NA	NA	NA	NA	173204	NA	NA	NA	NA	NA	186	NA	NA	FALSE	NA	NA	NA	NA	TRUE	NA	NA	NA	NA	NA	FALSE	NA	TRUE	NA	TRUE
180755371	Acbd3	chr1	+	180726043	180761008	1.80756e+08	85.4021	0.0604373	180755515	180756027	512	Acbd3:chr1:180755515-180756027:+	Acbd3:10	180755371	180755671		NA	180755071	180755671	NA	NA	NA	NA	119150	NA	NA	NA	NA	NA	132	NA	NA	FALSE	NA	NA	NA	NA	TRUE	NA	NA	NA	NA	NA	TRUE	NA	TRUE	NA	TRUE
155572206	Acbd6	chr1	+	155558120	155691331	1.55572e+08	16.3267	1	155572165	155572263	98	Acbd6:chr1:155572165-155572263:+	Acbd6:4	155572206	155572506	34,81	2	155571906	155572506	NA	NA	NA	NA	NA	NA	129	NA	NA	63	NA	NA	NA	FALSE	NA	NA	NA	NA	NA	NA	TRUE	NA	NA	FALSE	NA	NA	TRUE	NA	TRUE
30895787	Acp1	chr12	-	30893316	30911571	3.08958e+07	60.3003	0.358316	30895616	30895978	362	Acp1:chr12:30895616-30895978:-	Acp1:1	30895487	30895787		NA	30895487	30896087	25	NA	67	NA	NA	NA	121	NA	NA	NA	179	174184190196	NA	FALSE	FALSE	NA	FALSE	NA	NA	NA	TRUE	NA	NA	NA	TRUE	TRUE	TRUE	NA	TRUE
91213186	Acp2	chr2	+	91202909	91216026	9.12132e+07	37.3379	0.0965027	91213090	91213314	224	Acp2:chr2:91213090-91213314:+	Acp2:2	91213186	91213486		NA	91212886	91213486	NA	NA	NA	NA	NA	NA	NA	NA	NA	NA	178182	NA	NA	FALSE	NA	NA	NA	NA	NA	NA	NA	NA	NA	NA	TRUE	NA	TRUE	NA	TRUE
78706562	Acsl3	chr1	+	78657825	78707767	7.87067e+07	54.0574	0.0863532	78706508	78706832	324	Acsl3:chr1:78706508-78706832:+	Acsl3:16	78706562	78706862	20293	2	78706262	78706862	145192269	228	215	NA	NA	3	NA	NA	226	275	NA	NA	NA	FALSE	TRUE	FALSE	FALSE	NA	NA	FALSE	NA	NA	FALSE	FALSE	NA	NA	TRUE	NA	TRUE
55295514	Acsl5	chr19	+	55253369	55297720	5.52955e+07	11.3342	0.419245	55295471	55295539	68	Acsl5:chr19:55295471-55295539:+	Acsl5:2	55295514	55295814	8	1	55295214	55295814	NA	NA	NA	NA	NA	NA	NA	NA	NA	146	NA	NA	NA	FALSE	NA	NA	NA	NA	NA	NA	NA	NA	NA	TRUE	NA	NA	TRUE	NA	TRUE
70962691	Actr10	chr12	+	70937857	70964718	70962691	49.6698	0.0908351	70962541	70962840	299	Actr10:chr12:70962541-70962840:+	Actr10:5	70962691	70962991		NA	70962391	70962991	145	NA	NA	NA	NA	NA	NA	NA	NA	NA	NA	NA	NA	FALSE	TRUE	NA	NA	NA	NA	NA	NA	NA	NA	NA	NA	NA	TRUE	NA	TRUE
119441459	Acvr2b	chr9	+	119402444	119442148	1.19441e+08	64.0379	0.148671	119441261	119441645	384	Acvr2b:chr9:119441261-119441645:+	Acvr2b:7	119441459	119441759		NA	119441159	119441759	NA	NA	NA	NA	NA	NA	177	NA	NA	NA	NA	198204	NA	FALSE	NA	NA	NA	NA	NA	NA	TRUE	NA	NA	NA	NA	FALSE	TRUE	NA	TRUE
102779985	Adam11	chr11	+	102761439	102780262	1.0278e+08	79.1731	0.32899	102779739	102780214	475	Adam11:chr11:102779739-102780214:+	Adam11:2	102779985	102780262	248275248275	4	102779685	102780285	NA	NA	NA	NA	231238	NA	NA	NA	NA	NA	123	NA	NA	FALSE	NA	NA	NA	NA	FALSE	NA	NA	NA	NA	NA	TRUE	NA	TRUE	NA	TRUE
21324042	Adam17	chr12	-	21323509	21373593	2.1324e+07	127.52	0.365701	21323582	21324347	765	Adam17:chr12:21323582-21324347:-	Adam17:1	21323742	21324042	232,201,95,68,12,232,201,95,68,12	10	21323742	21324342	226	210	NA	NA	NA	NA	NA	174	64191	NA	196	NA	NA	FALSE	FALSE	FALSE	NA	NA	NA	NA	NA	TRUE	FALSE	NA	FALSE	NA	TRUE	NA	TRUE
33529888	Adamts10	chr17	+	33524204	33553787	3.35299e+07	47.1561	1	33529744	33530027	283	Adamts10:chr17:33529744-33530027:+	Adamts10:2	33529888	33530188		NA	33529588	33530188	NA	NA	NA	NA	NA	67	NA	NA	NA	NA	176	72,86	NA	FALSE	NA	NA	NA	NA	NA	FALSE	NA	NA	NA	NA	TRUE	FALSE	TRUE	NA	TRUE
33532491	Adamts10	chr17	+	33524204	33553787	3.35325e+07	67.3919	0.373833	33532272	33532676	404	Adamts10:chr17:33532272-33532676:+	Adamts10:4	33532491	33532791		NA	33532191	33532791	NA	NA	NA	NA	162	NA	NA	NA	NA	NA	169	NA	NA	FALSE	NA	NA	NA	NA	TRUE	NA	NA	NA	NA	NA	TRUE	NA	TRUE	NA	TRUE
33532907	Adamts10	chr17	+	33524204	33553787	3.35327e+07	53.9232	0.118052	33532521	33532844	323	Adamts10:chr17:33532521-33532844:+	Adamts10:4	33532907	33533207		NA	33532607	33533207	85	11	NA	NA	92	52	NA	NA	NA	17	NA	268275285	262263264	FALSE	FALSE	FALSE	NA	NA	TRUE	FALSE	NA	NA	NA	FALSE	NA	FALSE	TRUE	FALSE	TRUE
33533085	Adamts10	chr17	+	33524204	33553787	3.3533e+07	35.7743	0.132187	33532906	33533120	214	Adamts10:chr17:33532906-33533120:+	Adamts10:4	33533085	33533385		NA	33532785	33533385	293	NA	NA	281	NA	NA	NA	NA	NA	NA	NA	90,97,107,120	84,85,86	FALSE	FALSE	NA	NA	FALSE	NA	NA	NA	NA	NA	NA	NA	TRUE	TRUE	FALSE	TRUE
113698195	Adamts18	chr8	-	113697124	113848615	1.13698e+08	71.9773	0.976791	113697934	113698366	432	Adamts18:chr8:113697934-113698366:-	Adamts18:2	113697895	113698195	273	1	113697895	113698495	NA	NA	NA	NA	146	NA	NA	NA	NA	245251256	NA	NA	NA	FALSE	NA	NA	NA	NA	TRUE	NA	NA	NA	NA	FALSE	NA	NA	TRUE	NA	TRUE
13563818	Adat2	chr10	+	13552894	13567261	1.35638e+07	30.7231	0.254379	13563725	13563909	184	Adat2:chr10:13563725-13563909:+	Adat2:3	13563818	13564118	202294	2	13563518	13564118	167289	197	182	NA	NA	NA	NA	NA	NA	248	NA	NA	NA	FALSE	TRUE	FALSE	FALSE	NA	NA	NA	NA	NA	NA	FALSE	NA	NA	TRUE	NA	TRUE
13567148	Adat2	chr10	+	13552894	13567261	1.35671e+07	44.2533	1	13567012	13567261	249	Adat2:chr10:13567012-13567261:+	Adat2:4	13567148	13567261		NA	13566848	13567448	90	2	NA	NA	NA	NA	NA	NA	NA	106	NA	NA	NA	FALSE	TRUE	FALSE	NA	NA	NA	NA	NA	NA	NA	TRUE	NA	NA	TRUE	NA	TRUE
93205462	Adcyap1	chr17	+	93199021	93206537	9.32053e+07	76.4029	0.435441	93205110	93205568	458	Adcyap1:chr17:93205110-93205568:+	Adcyap1:2	93205462	93205762	46101	2	93205162	93205762	93	NA	84226	24	NA	10	NA	NA	NA	NA	NA	230268	NA	FALSE	TRUE	NA	FALSE	FALSE	NA	FALSE	NA	NA	NA	NA	NA	FALSE	TRUE	NA	TRUE
93205521	Adcyap1	chr17	+	93199021	93206537	9.32055e+07	35.5966	0.0496099	93205386	93205600	214	Adcyap1:chr17:93205386-93205600:+	Adcyap1:2	93205521	93205821	42	1	93205221	93205821	34	NA	25167	NA	244	NA	NA	NA	NA	NA	293	1.71209e+17	288289	FALSE	FALSE	NA	TRUE	NA	FALSE	NA	NA	NA	NA	NA	FALSE	TRUE	TRUE	FALSE	TRUE
14402456	Adgrg6	chr10	-	14401556	14545036	1.44024e+07	56.4673	1	14402276	14402614	338	Adgrg6:chr10:14402276-14402614:-	Adgrg6:1	14402156	14402456		NA	14402156	14402756	NA	NA	NA	NA	NA	168	NA	8	12	160	177193	218	NA	FALSE	NA	NA	NA	NA	NA	TRUE	NA	FALSE	FALSE	TRUE	TRUE	FALSE	TRUE	NA	TRUE
36003435	Afap1	chr5	+	35893319	36003923	3.60034e+07	87.8817	0.0856388	36003124	36003651	527	Afap1:chr5:36003124-36003651:+	Afap1:10	36003435	36003735	72259296	3	36003135	36003735	59,82	NA	NA	NA	NA	241	70	273	200	NA	111	NA	NA	FALSE	FALSE	NA	NA	NA	NA	FALSE	FALSE	FALSE	FALSE	NA	TRUE	NA	TRUE	NA	TRUE
13898264	Afdn	chr17	+	13760548	13906150	13898264	69.0922	0.463621	13898056	13898471	415	Afdn:chr17:13898056-13898471:+	Afdn:23	13898264	13898564	95	1	13897964	13898564	68	NA	NA	NA	NA	NA	NA	114	139	NA	NA	44	NA	FALSE	FALSE	NA	NA	NA	NA	NA	NA	TRUE	TRUE	NA	NA	FALSE	TRUE	NA	TRUE
117838851	Afmid	chr11	+	117825924	117840332	1.17839e+08	56.9789	1	117838675	117839017	342	Afmid:chr11:117838675-117839017:+	Afmid:4	117838851	117839151		NA	117838551	117839151	NA	NA	NA	NA	NA	NA	NA	58	NA	NA	54178182	NA	NA	FALSE	NA	NA	NA	NA	NA	NA	NA	FALSE	NA	NA	TRUE	NA	TRUE	NA	TRUE
117839802	Afmid	chr11	+	117825924	117840332	1.1784e+08	63.5721	0.905191	117839533	117839915	382	Afmid:chr11:117839533-117839915:+	Afmid:5	117839802	117840102	104104	2	117839502	117840102	NA	NA	NA	NA	82	NA	NA	NA	142	NA	NA	NA	NA	FALSE	NA	NA	NA	NA	FALSE	NA	NA	NA	TRUE	NA	NA	NA	TRUE	NA	TRUE
89890538	Agap1	chr1	+	89454806	89897617	8.98905e+07	81.0794	0.806548	89890276	89890762	486	Agap1:chr1:89890276-89890762:+	Agap1:32	89890538	89890838	215	1	89890238	89890838	166	NA	NA	NA	NA	NA	NA	NA	NA	NA	174	179186	NA	FALSE	TRUE	NA	NA	NA	NA	NA	NA	NA	NA	NA	TRUE	TRUE	TRUE	NA	TRUE
34786111	Agbl3	chr6	+	34780432	34860937	3.47861e+07	37.3696	0.44652	34786008	34786232	224	Agbl3:chr6:34786008-34786232:+	Agbl3:3	34786111	34786411		NA	34785811	34786411	NA	NA	166	NA	NA	NA	NA	NA	NA	147	NA	NA	NA	FALSE	NA	NA	TRUE	NA	NA	NA	NA	NA	NA	TRUE	NA	NA	TRUE	NA	TRUE
30899333	Agbl5	chr5	+	30888852	30906973	3.08993e+07	147.49	1	30898870	30899755	885	Agbl5:chr5:30898870-30899755:+	Agbl5:3	30899333	30899633	5,57,94,213,248	5	30899033	30899633	113	234	NA	NA	NA	NA	NA	NA	NA	NA	NA	NA	NA	FALSE	TRUE	FALSE	NA	NA	NA	NA	NA	NA	NA	NA	NA	NA	TRUE	NA	TRUE
73106403	Ago2	chr15	-	73095844	73184935	7.31064e+07	51.6163	0.479256	73106230	73106540	310	Ago2:chr15:73106230-73106540:-	Ago2:4	73106103	73106403	282256211	3	73106103	73106703	170	NA	158278	NA	NA	NA	NA	NA	191	NA	NA	74	NA	FALSE	TRUE	NA	TRUE	NA	NA	NA	NA	NA	FALSE	NA	NA	FALSE	TRUE	NA	TRUE
73106581	Ago2	chr15	-	73095844	73184935	7.31064e+07	99.5912	0.325787	73106148	73106746	598	Ago2:chr15:73106148-73106746:-	Ago2:4	73106281	73106581	23,6	2	73106281	73106881	119	NA	NA	NA	NA	NA	NA	NA	NA	NA	NA	252	NA	FALSE	TRUE	NA	NA	NA	NA	NA	NA	NA	NA	NA	NA	FALSE	TRUE	NA	TRUE
126340433	Ago3	chr4	-	126332732	126429556	1.2634e+08	48.5673	0.415483	126340292	126340583	291	Ago3:chr4:126340292-126340583:-	Ago3:3	126340133	126340433		NA	126340133	126340733	239	NA	143	NA	NA	289	NA	NA	NA	160164169173	NA	148	NA	FALSE	FALSE	NA	TRUE	NA	NA	FALSE	NA	NA	NA	TRUE	NA	TRUE	TRUE	NA	TRUE
126340747	Ago3	chr4	-	126332732	126429556	1.26341e+08	103.476	0.584517	126340515	126341136	621	Ago3:chr4:126340515-126341136:-	Ago3:3	126340447	126340747	66	1	126340447	126341047	NA	NA	132	NA	NA	NA	NA	NA	199	194	74,92	NA	NA	FALSE	NA	NA	TRUE	NA	NA	NA	NA	NA	FALSE	FALSE	TRUE	NA	TRUE	NA	TRUE
126492374	Ago4	chr4	-	126489457	126533472	1.26492e+08	67.8437	0.990237	126492145	126492552	407	Ago4:chr4:126492145-126492552:-	Ago4:2	126492074	126492374		NA	126492074	126492674	158207	118144	NA	NA	NA	NA	NA	NA	NA	NA	NA	163168173	2.0921e+17	FALSE	TRUE	TRUE	NA	NA	NA	NA	NA	NA	NA	NA	NA	TRUE	TRUE	FALSE	TRUE
18879719	Agpat5	chr8	+	18846277	18891361	1.88797e+07	31.0739	1	18879603	18879789	186	Agpat5:chr8:18879603-18879789:+	Agpat5:11	18879719	18880019	13	1	18879419	18880019	NA	NA	NA	NA	NA	106	294	NA	NA	NA	NA	NA	NA	FALSE	NA	NA	NA	NA	NA	TRUE	FALSE	NA	NA	NA	NA	NA	TRUE	NA	TRUE
107664135	Ahcyl1	chr3	-	107662481	107696560	1.07664e+08	84.6294	0.714511	107663891	107664399	508	Ahcyl1:chr3:107663891-107664399:-	Ahcyl1:2	107663835	107664135	204,108,79	3	107663835	107664435	NA	187	55	NA	NA	NA	NA	NA	79	178	45	75	NA	FALSE	NA	FALSE	FALSE	NA	NA	NA	NA	NA	FALSE	TRUE	FALSE	FALSE	TRUE	NA	TRUE
133077021	Ahdc1	chr4	+	133011506	133078110	1.33077e+08	36.7362	0.140411	133076924	133077145	221	Ahdc1:chr4:133076924-133077145:+	Ahdc1:6	133077021	133077321	101224	2	133076721	133077321	166	NA	NA	NA	NA	NA	NA	NA	NA	NA	NA	188	NA	FALSE	TRUE	NA	NA	NA	NA	NA	NA	NA	NA	NA	NA	FALSE	TRUE	NA	TRUE
23490559	Ahsa2	chr11	-	23487328	23497930	23490559	14.1878	0.0283879	23490516	23490601	85	Ahsa2:chr11:23490516-23490601:-	Ahsa2:2	23490259	23490559	269257215	3	23490259	23490859	192	NA	NA	NA	NA	NA	NA	NA	NA	123	119	NA	NA	FALSE	FALSE	NA	NA	NA	NA	NA	NA	NA	NA	TRUE	TRUE	NA	TRUE	NA	TRUE
52677118	AI593442	chr9	-	52673032	52679780	5.26771e+07	49.8363	1	52676968	52677267	299	AI593442:chr9:52676968-52677267:-	AI593442:2	52676818	52677118		NA	52676818	52677418	NA	NA	NA	NA	NA	NA	NA	NA	NA	NA	166	171178	NA	FALSE	NA	NA	NA	NA	NA	NA	NA	NA	NA	NA	TRUE	TRUE	TRUE	NA	TRUE
41373307	AI987944	chr7	-	41372900	41393312	4.13733e+07	46.7013	0.0663204	41373182	41373462	280	AI987944:chr7:41373182-41373462:-	AI987944:1	41373007	41373307		NA	41373007	41373607	NA	NA	NA	NA	NA	NA	NA	NA	NA	NA	161	NA	NA	FALSE	NA	NA	NA	NA	NA	NA	NA	NA	NA	NA	TRUE	NA	TRUE	NA	TRUE
153373358	Ajap1	chr4	-	153373221	153482811	1.53373e+08	53.5347	1	153373221	153373518	297	Ajap1:chr4:153373221-153373518:-	Ajap1:1	153373221	153373358	77	1	153373058	153373658	NA	NA	NA	NA	119	NA	94	NA	127	NA	NA	NA	NA	FALSE	NA	NA	NA	NA	TRUE	NA	TRUE	NA	TRUE	NA	NA	NA	TRUE	NA	TRUE
32638813	Ak1	chr2	+	32621758	32638919	3.26388e+07	32.5453	1	32638703	32638898	195	Ak1:chr2:32638703-32638898:+	Ak1:3	32638813	32638919		NA	32638513	32639113	NA	NA	NA	NA	NA	NA	NA	41	NA	91,95,99	NA	NA	NA	FALSE	NA	NA	NA	NA	NA	NA	NA	FALSE	NA	TRUE	NA	NA	TRUE	NA	TRUE
21495615	AK157302	chr13	+	21495223	21497146	2.14956e+07	47.4471	1	21495468	21495753	285	AK157302:chr13:21495468-21495753:+	AK157302:1	21495615	21495915	212	1	21495315	21495915	NA	NA	NA	NA	NA	NA	NA	NA	NA	190	134	NA	NA	FALSE	NA	NA	NA	NA	NA	NA	NA	NA	NA	FALSE	TRUE	NA	TRUE	NA	TRUE
34368150	Akr1b8	chr6	+	34354119	34368463	3.43682e+07	26.2708	0.0902736	34368090	34368248	158	Akr1b8:chr6:34368090-34368248:+	Akr1b8:1	34368150	34368450	231267	2	34367850	34368450	128	NA	270	NA	NA	NA	NA	NA	NA	278	NA	NA	NA	FALSE	TRUE	NA	FALSE	NA	NA	NA	NA	NA	NA	FALSE	NA	NA	TRUE	NA	TRUE
4249640	Akr1c19	chr13	+	4228700	4252843	4.24962e+06	57.8362	1	4249446	4249793	347	Akr1c19:chr13:4249446-4249793:+	Akr1c19:4	4249640	4249940		NA	4249340	4249940	139	NA	NA	NA	NA	NA	NA	NA	NA	121	NA	NA	NA	FALSE	TRUE	NA	NA	NA	NA	NA	NA	NA	NA	TRUE	NA	NA	TRUE	NA	TRUE
91112405	Aktip	chr8	-	91111781	91133997	9.11124e+07	82.9784	1	91112162	91112660	498	Aktip:chr8:91112162-91112660:-	Aktip:1	91112105	91112405	271	1	91112105	91112705	NA	NA	NA	NA	NA	NA	NA	NA	NA	NA	268283	125	NA	FALSE	NA	NA	NA	NA	NA	NA	NA	NA	NA	NA	FALSE	TRUE	TRUE	NA	TRUE
52253226	Alcam	chr16	-	52248996	52454074	5.22534e+07	73.2691	0.148885	52253159	52253598	439	Alcam:chr16:52253159-52253598:-	Alcam:2	52252926	52253226	101	1	52252926	52253526	NA	NA	168	NA	NA	NA	NA	NA	NA	37	50	NA	NA	FALSE	NA	NA	TRUE	NA	NA	NA	NA	NA	NA	FALSE	FALSE	NA	TRUE	NA	TRUE
45142788	Aldh16a1	chr7	-	45140026	45154584	4.51428e+07	24.9882	1	45142730	45142880	150	Aldh16a1:chr7:45142730-45142880:-	Aldh16a1:2	45142488	45142788	277	1	45142488	45143088	NA	257	NA	NA	NA	NA	NA	NA	NA	NA	105	NA	NA	FALSE	NA	FALSE	NA	NA	NA	NA	NA	NA	NA	NA	TRUE	NA	TRUE	NA	TRUE
22071310	Alg11	chr8	+	22060721	22073338	2.20714e+07	90.6868	0.376686	22071079	22071623	544	Alg11:chr8:22071079-22071623:+	Alg11:5	22071310	22071610	207279	2	22071010	22071610	NA	NA	NA	NA	190	NA	NA	NA	110	NA	NA	NA	NA	FALSE	NA	NA	NA	NA	FALSE	NA	NA	NA	TRUE	NA	NA	NA	TRUE	NA	TRUE
88805535	Alg12	chr15	-	88805238	88819318	8.88055e+07	85.7625	0.228467	88805278	88805793	515	Alg12:chr15:88805278-88805793:-	Alg12:1	88805238	88805535	289	1	88805235	88805835	NA	105	NA	257	NA	NA	NA	NA	NA	271	NA	NA	NA	FALSE	NA	TRUE	NA	FALSE	NA	NA	NA	NA	NA	FALSE	NA	NA	TRUE	NA	TRUE
144324135	Alg13	chrX	+	144317804	144374718	1.44324e+08	174.255	0.123276	144323734	144324779	1045	Alg13:chrX:144323734-144324779:+	Alg13:3	144324135	144324435	14,42,77,91,255	5	144323835	144324435	8,98	84	42	126	NA	161	239	NA	NA	53	NA	NA	NA	FALSE	TRUE	FALSE	FALSE	TRUE	NA	TRUE	FALSE	NA	NA	FALSE	NA	NA	TRUE	NA	TRUE
144324844	Alg13	chrX	+	144317804	144374718	1.44325e+08	62.3396	0.127028	144324683	144325057	374	Alg13:chrX:144324683-144325057:+	Alg13:3	144324844	144325144		NA	144324544	144325144	101	NA	NA	74	NA	28	NA	NA	NA	NA	NA	NA	NA	FALSE	TRUE	NA	NA	FALSE	NA	FALSE	NA	NA	NA	NA	NA	NA	TRUE	NA	TRUE
3385749	Alkbh8	chr9	+	3335478	3391174	3.38583e+06	102.268	0.154129	3385523	3386137	614	Alkbh8:chr9:3385523-3386137:+	Alkbh8:7	3385749	3386049	19,93,108	3	3385449	3386049	NA	NA	94	NA	NA	NA	NA	170	NA	NA	NA	NA	NA	FALSE	NA	NA	TRUE	NA	NA	NA	NA	TRUE	NA	NA	NA	NA	TRUE	NA	TRUE
120587291	Alyref	chr11	-	120587155	120598365	1.20587e+08	62.3521	1	120587155	120587477	322	Alyref:chr11:120587155-120587477:-	Alyref:1	120587155	120587291	53	1	120586991	120587591	NA	34	NA	NA	NA	NA	NA	NA	125	NA	NA	NA	NA	FALSE	NA	FALSE	NA	NA	NA	NA	NA	NA	TRUE	NA	NA	NA	TRUE	NA	TRUE
40288927	Amd1	chr10	-	40285328	40302186	40288927	92.6199	0.24608	40288649	40289204	555	Amd1:chr10:40288649-40289204:-	Amd1:2	40288627	40288927	80,50,80,50	4	40288627	40289227	NA	NA	NA	NA	19134	NA	NA	NA	NA	NA	168	NA	NA	FALSE	NA	NA	NA	NA	TRUE	NA	NA	NA	NA	NA	TRUE	NA	TRUE	NA	TRUE
40289459	Amd1	chr10	-	40285328	40302186	40289459	36.1704	0.221052	40289350	40289567	217	Amd1:chr10:40289350-40289567:-	Amd1:2	40289159	40289459		NA	40289159	40289759	39	NA	NA	NA	NA	NA	NA	140	NA	NA	105147	NA	NA	FALSE	FALSE	NA	NA	NA	NA	NA	NA	TRUE	NA	NA	TRUE	NA	TRUE	NA	TRUE
14545136	Amotl1	chr9	-	14541966	14615006	1.45451e+07	38.2269	0.219519	14545016	14545246	230	Amotl1:chr9:14545016-14545246:-	Amotl1:3	14544836	14545136	300204	2	14544836	14545436	NA	NA	268279	NA	166	NA	70	NA	NA	174178182283	272	NA	NA	FALSE	NA	NA	FALSE	NA	TRUE	NA	FALSE	NA	NA	TRUE	FALSE	NA	TRUE	NA	TRUE
14545200	Amotl1	chr9	-	14541966	14615006	1.45452e+07	84.9723	0.780481	14544905	14545415	510	Amotl1:chr9:14544905-14545415:-	Amotl1:3	14544900	14545200	268	1	14544900	14545500	NA	NA	NA	NA	230	NA	134	NA	NA	238242246	NA	NA	NA	FALSE	NA	NA	NA	NA	FALSE	NA	TRUE	NA	NA	FALSE	NA	NA	TRUE	NA	TRUE
86700764	Angel1	chr12	-	86700502	86726460	8.67008e+07	33.3259	0.180347	86700684	86700884	200	Angel1:chr12:86700684-86700884:-	Angel1:1	86700502	86700764	261226	2	86700464	86701064	183	NA	NA	NA	NA	NA	NA	168	NA	240	NA	NA	NA	FALSE	FALSE	NA	NA	NA	NA	NA	NA	TRUE	NA	FALSE	NA	NA	TRUE	NA	TRUE
190946229	Angel2	chr1	+	190925112	190946984	1.90946e+08	100.418	0.473373	190945973	190946575	602	Angel2:chr1:190945973-190946575:+	Angel2:5	190946229	190946529	217264	2	190945929	190946529	142263	NA	NA	NA	NA	105	NA	NA	NA	197248	NA	NA	NA	FALSE	TRUE	NA	NA	NA	NA	TRUE	NA	NA	NA	FALSE	NA	NA	TRUE	NA	TRUE
127031844	Ank2	chr3	-	126919674	127409031	1.27032e+08	62.1355	1	127031664	127032037	373	Ank2:chr3:127031664-127032037:-	Ank2:16	127031544	127031844		NA	127031544	127032144	280	252	NA	NA	NA	NA	176	NA	NA	109	13284	160167171183	NA	FALSE	FALSE	FALSE	NA	NA	NA	NA	TRUE	NA	NA	TRUE	FALSE	TRUE	TRUE	NA	TRUE
110255267	Ankle2	chr5	+	110231004	110257023	1.10255e+08	97.9159	0.477729	110254953	110255541	588	Ankle2:chr5:110254953-110255541:+	Ankle2:8	110255267	110255567	41,60,104,204	4	110254967	110255567	NA	94	NA	NA	186	NA	NA	NA	NA	20,79	103	NA	NA	FALSE	NA	TRUE	NA	NA	FALSE	NA	NA	NA	NA	FALSE	TRUE	NA	TRUE	NA	TRUE
110255679	Ankle2	chr5	+	110231004	110257023	1.10256e+08	94.5611	0.409607	110255470	110256038	568	Ankle2:chr5:110255470-110256038:+	Ankle2:8	110255679	110255979	23215245284	4	110255379	110255979	233	94	NA	NA	NA	NA	NA	NA	NA	266	NA	238244	NA	FALSE	FALSE	TRUE	NA	NA	NA	NA	NA	NA	NA	FALSE	NA	FALSE	TRUE	NA	TRUE
158007656	Ankrd13c	chr3	+	157947414	158011169	1.58008e+08	146.518	0.147557	158007203	158008082	879	Ankrd13c:chr3:158007203-158008082:+	Ankrd13c:14	158007656	158007956		NA	158007356	158007956	NA	NA	96	NA	NA	NA	NA	NA	NA	NA	89	NA	NA	FALSE	NA	NA	TRUE	NA	NA	NA	NA	NA	NA	NA	FALSE	NA	TRUE	NA	TRUE
118502751	Ankrd26	chr6	-	118501300	118562226	1.18503e+08	57.5966	0.452608	118502562	118502908	346	Ankrd26:chr6:118502562-118502908:-	Ankrd26:2	118502451	118502751	245	1	118502451	118503051	186	NA	NA	173	218241	NA	NA	NA	1	178223227	194	199	NA	FALSE	FALSE	NA	NA	TRUE	FALSE	NA	NA	NA	FALSE	TRUE	FALSE	FALSE	TRUE	NA	TRUE
118503146	Ankrd26	chr6	-	118501300	118562226	1.18503e+08	74.3739	0.547392	118502907	118503353	446	Ankrd26:chr6:118502907-118503353:-	Ankrd26:2	118502846	118503146		NA	118502846	118503446	126	NA	NA	NA	NA	NA	44	NA	108	NA	101144	NA	NA	FALSE	TRUE	NA	NA	NA	NA	NA	FALSE	NA	TRUE	NA	TRUE	NA	TRUE	NA	TRUE
35608896	Ankrd27	chr7	+	35586244	35639241	3.56089e+07	78.3542	0.815322	35608637	35609107	470	Ankrd27:chr7:35608637-35609107:+	Ankrd27:2	35608896	35609196	216	1	35608596	35609196	NA	257	NA	NA	192	182	NA	NA	186	177197	NA	201	NA	FALSE	NA	FALSE	NA	NA	FALSE	FALSE	NA	NA	FALSE	TRUE	NA	FALSE	TRUE	NA	TRUE
96690288	Ankrd35	chr3	+	96670131	96691034	9.66903e+07	29.7783	0.21875	96690178	96690356	178	Ankrd35:chr3:96690178-96690356:+	Ankrd35:1	96690288	96690588	8	1	96689988	96690588	NA	186	NA	NA	NA	168277	NA	NA	184	NA	NA	NA	NA	FALSE	NA	FALSE	NA	NA	NA	TRUE	NA	NA	FALSE	NA	NA	NA	TRUE	NA	TRUE
45997624	Ankrd37	chr8	-	45996902	45999867	4.59977e+07	41.3619	0.269621	45997534	45997782	248	Ankrd37:chr8:45997534-45997782:-	Ankrd37:1	45997324	45997624	10	1	45997324	45997924	124219	NA	NA	NA	NA	NA	NA	NA	NA	NA	NA	NA	NA	FALSE	TRUE	NA	NA	NA	NA	NA	NA	NA	NA	NA	NA	NA	TRUE	NA	TRUE
128395513	Ankrd52	chr10	+	128377119	128395968	1.28395e+08	21.0997	0.00249243	128395047	128395174	127	Ankrd52:chr10:128395047-128395174:+	Ankrd52:3	128395513	128395813	10,48,228,271,291	5	128395213	128395813	NA	NA	NA	NA	NA	31	NA	NA	NA	177	NA	NA	NA	FALSE	NA	NA	NA	NA	NA	FALSE	NA	NA	NA	TRUE	NA	NA	TRUE	NA	TRUE
25886518	Anxa11	chr14	+	25842156	25886804	2.58868e+07	23.0704	0.0683306	25886689	25886804	115	Anxa11:chr14:25886689-25886804:+	Anxa11:3	25886518	25886804	286	1	25886218	25886818	9	NA	NA	NA	149	NA	NA	NA	NA	249	NA	NA	NA	FALSE	FALSE	NA	NA	NA	TRUE	NA	NA	NA	NA	FALSE	NA	NA	TRUE	NA	TRUE
86736919	Anxa4	chr6	-	86736691	86765910	8.6737e+07	66.5707	0.931328	86736801	86737200	399	Anxa4:chr6:86736801-86737200:-	Anxa4:1	86736691	86736919	226,79,40	3	86736619	86737219	71	NA	NA	NA	57208	NA	164	NA	NA	NA	216	NA	NA	FALSE	FALSE	NA	NA	NA	FALSE	NA	TRUE	NA	NA	NA	FALSE	NA	TRUE	NA	TRUE
109862144	Ap1g1	chr8	+	109778554	109864209	1.09862e+08	124.409	0.447754	109861804	109862551	747	Ap1g1:chr8:109861804-109862551:+	Ap1g1:12	109862144	109862444	64222	2	109861844	109862444	NA	NA	NA	NA	NA	NA	NA	NA	NA	NA	166	NA	NA	FALSE	NA	NA	NA	NA	NA	NA	NA	NA	NA	NA	TRUE	NA	TRUE	NA	TRUE
83397836	Ap2b1	chr11	+	83302483	83405051	8.33978e+07	49.7705	1	83397682	83397980	298	Ap2b1:chr11:83397682-83397980:+	Ap2b1:12	83397836	83398136		NA	83397536	83398136	134	NA	NA	NA	NA	NA	NA	NA	NA	NA	NA	NA	NA	FALSE	TRUE	NA	NA	NA	NA	NA	NA	NA	NA	NA	NA	NA	TRUE	NA	TRUE
46790354	Ap3s1	chr18	+	46741876	46790826	4.67904e+07	89.5814	1	46790099	46790637	538	Ap3s1:chr18:46790099-46790637:+	Ap3s1:1	46790354	46790654	267267	2	46790054	46790654	86134	NA	NA	NA	NA	236	NA	NA	NA	138240	NA	231	NA	FALSE	TRUE	NA	NA	NA	NA	FALSE	NA	NA	NA	TRUE	NA	FALSE	TRUE	NA	TRUE
79877538	Ap3s2	chr7	-	79875321	79920649	7.98775e+07	64.9133	0.283462	79877352	79877741	389	Ap3s2:chr7:79877352-79877741:-	Ap3s2:3	79877238	79877538	53,35	2	79877238	79877838	NA	NA	NA	NA	NA	NA	NA	NA	NA	NA	21,31,176	NA	NA	FALSE	NA	NA	NA	NA	NA	NA	NA	NA	NA	NA	TRUE	NA	TRUE	NA	TRUE
49075046	Ap5m1	chr14	+	49066097	49091074	4.9075e+07	56.675	0.191385	49074851	49075191	340	Ap5m1:chr14:49074851-49075191:+	Ap5m1:3	49075046	49075346	253	1	49074746	49075346	NA	NA	NA	NA	224	178	NA	NA	NA	173	NA	191	NA	FALSE	NA	NA	NA	NA	FALSE	TRUE	NA	NA	NA	TRUE	NA	FALSE	TRUE	NA	TRUE
34318769	Apc	chr18	+	34220984	34322552	3.43187e+07	127.939	0.134078	34318336	34319104	768	Apc:chr18:34318336-34319104:+	Apc:30	34318769	34319069	219	1	34318469	34319069	NA	167	NA	NA	172	NA	NA	NA	NA	NA	NA	NA	NA	FALSE	NA	TRUE	NA	NA	TRUE	NA	NA	NA	NA	NA	NA	NA	TRUE	NA	TRUE
34319083	Apc	chr18	+	34220984	34322552	3.43191e+07	84.0655	0.170374	34318893	34319398	505	Apc:chr18:34318893-34319398:+	Apc:30	34319083	34319383	220248282	3	34318783	34319383	NA	NA	NA	NA	NA	NA	277	13143281	NA	295	NA	NA	NA	FALSE	NA	NA	NA	NA	NA	NA	FALSE	TRUE	NA	FALSE	NA	NA	TRUE	NA	TRUE
87628648	Aplf	chr6	-	87626222	87672193	8.76287e+07	78.1364	0.394809	87628484	87628953	469	Aplf:chr6:87628484-87628953:-	Aplf:1	87628348	87628648	219219	2	87628348	87628948	NA	NA	NA	NA	NA	NA	NA	NA	NA	95203	47192	114	NA	FALSE	NA	NA	NA	NA	NA	NA	NA	NA	NA	TRUE	FALSE	TRUE	TRUE	NA	TRUE
87628721	Aplf	chr6	-	87626222	87672193	8.76287e+07	32.7186	0.152939	87628633	87628829	196	Aplf:chr6:87628633-87628829:-	Aplf:1	87628421	87628721	292292	2	87628421	87629021	NA	4,19,34	NA	NA	NA	NA	NA	NA	NA	58168276	44120265	187	NA	FALSE	NA	FALSE	NA	NA	NA	NA	NA	NA	NA	TRUE	TRUE	FALSE	TRUE	NA	TRUE
87628810	Aplf	chr6	-	87626222	87672193	8.76289e+07	36.3332	0.0814214	87628807	87629025	218	Aplf:chr6:87628807-87629025:-	Aplf:1	87628510	87628810		NA	87628510	87629110	NA	38,74,93,108,123	NA	NA	NA	NA	NA	NA	NA	147257	133209	276	NA	FALSE	NA	TRUE	NA	NA	NA	NA	NA	NA	NA	TRUE	TRUE	FALSE	TRUE	NA	TRUE
85139619	Aplnr	chr2	+	85136225	85139923	8.51396e+07	110.569	0.184693	85139307	85139923	616	Aplnr:chr2:85139307-85139923:+	Aplnr:1	85139619	85139919	254	1	85139319	85139919	253	NA	NA	NA	NA	NA	NA	NA	NA	287	NA	166	NA	FALSE	FALSE	NA	NA	NA	NA	NA	NA	NA	NA	FALSE	NA	TRUE	TRUE	NA	TRUE
48419348	Apobec2	chr17	-	48419225	48432930	4.84193e+07	40.6538	0.251483	48419225	48419442	217	Apobec2:chr17:48419225-48419442:-	Apobec2:1	48419225	48419348	91,58,4	3	48419048	48419648	74	NA	NA	NA	NA	NA	NA	NA	NA	100	NA	NA	NA	FALSE	FALSE	NA	NA	NA	NA	NA	NA	NA	NA	TRUE	NA	NA	TRUE	NA	TRUE
79908213	Apobec3	chr15	+	79892408	79911487	7.99083e+07	58.6223	0.0540416	79908082	79908434	352	Apobec3:chr15:79908082-79908434:+	Apobec3:2	79908213	79908513	215263215263	4	79907913	79908513	NA	NA	NA	NA	NA	NA	NA	NA	119	NA	NA	NA	2.24225e+23	FALSE	NA	NA	NA	NA	NA	NA	NA	NA	TRUE	NA	NA	NA	TRUE	FALSE	TRUE
79909441	Apobec3	chr15	+	79892408	79911487	7.99094e+07	34.8993	1	79909306	79909515	209	Apobec3:chr15:79909306-79909515:+	Apobec3:3	79909441	79909741	41,41	2	79909141	79909741	NA	NA	NA	NA	NA	NA	NA	NA	NA	NA	279	22,26,30,113	NA	FALSE	NA	NA	NA	NA	NA	NA	NA	NA	NA	NA	FALSE	TRUE	TRUE	NA	TRUE
79910520	Apobec3	chr15	+	79892408	79911487	7.99105e+07	37.9435	1	79910402	79910629	227	Apobec3:chr15:79910402-79910629:+	Apobec3:4	79910520	79910820		NA	79910220	79910820	NA	NA	NA	NA	NA	NA	118	NA	NA	NA	129210	58,64	NA	FALSE	NA	NA	NA	NA	NA	NA	TRUE	NA	NA	NA	TRUE	FALSE	TRUE	NA	TRUE
134984979	Apold1	chr6	+	134981718	134986836	1.34985e+08	59.469	1	134984786	134985143	357	Apold1:chr6:134984786-134985143:+	Apold1:2	134984979	134985279		NA	134984679	134985279	257	NA	NA	NA	NA	NA	NA	NA	NA	177	10	1.54158e+20	NA	FALSE	FALSE	NA	NA	NA	NA	NA	NA	NA	NA	TRUE	FALSE	TRUE	TRUE	NA	TRUE
26918479	Appl1	chr14	-	26917791	26971232	2.69186e+07	75.7806	0.1696	26918330	26918785	455	Appl1:chr14:26918330-26918785:-	Appl1:1	26918179	26918479		NA	26918179	26918779	NA	NA	NA	NA	NA	NA	NA	NA	NA	NA	NA	95107	78,79,80,81,82,83,84,85,86,87,88,89,104	FALSE	NA	NA	NA	NA	NA	NA	NA	NA	NA	NA	NA	TRUE	TRUE	FALSE	TRUE
26921388	Appl1	chr14	-	26917791	26971232	2.69214e+07	52.6869	1	26921226	26921542	316	Appl1:chr14:26921226-26921542:-	Appl1:2	26921088	26921388	58	1	26921088	26921688	NA	NA	NA	NA	NA	NA	NA	NA	NA	NA	111	143	NA	FALSE	NA	NA	NA	NA	NA	NA	NA	NA	NA	NA	TRUE	TRUE	TRUE	NA	TRUE
15392971	Aqp4	chr18	-	15389394	15403758	1.5393e+07	50.2741	1	15392834	15393135	301	Aqp4:chr18:15392834-15393135:-	Aqp4:1	15392671	15392971		NA	15392671	15393271	NA	NA	NA	NA	NA	139	NA	194	NA	NA	NA	NA	NA	FALSE	NA	NA	NA	NA	NA	TRUE	NA	FALSE	NA	NA	NA	NA	TRUE	NA	TRUE
113831989	Arhgap11a	chr2	-	113829888	113848661	1.13832e+08	109.802	0.0776101	113831694	113832353	659	Arhgap11a:chr2:113831694-113832353:-	Arhgap11a:1	113831689	113831989	222,207,28,222,207,28,222,207,28	9	113831689	113832289	266	NA	NA	5	174	NA	NA	NA	NA	187	NA	203	NA	FALSE	FALSE	NA	NA	FALSE	TRUE	NA	NA	NA	NA	FALSE	NA	FALSE	TRUE	NA	TRUE
123279680	Arhgap17	chr7	-	123278067	123369886	1.2328e+08	75.4579	0.0658959	123279510	123279963	453	Arhgap17:chr7:123279510-123279963:-	Arhgap17:1	123279380	123279680	295,76,295,76,295,76	6	123279380	123279980	296	NA	NA	NA	165	NA	NA	NA	282	57	NA	NA	NA	FALSE	FALSE	NA	NA	NA	TRUE	NA	NA	NA	FALSE	FALSE	NA	NA	TRUE	NA	TRUE
51852016	Arhgap20	chr9	+	51765352	51854440	5.18523e+07	27.9365	0.0304402	51852167	51852335	168	Arhgap20:chr9:51852167-51852335:+	Arhgap20:8	51852016	51852316		NA	51851716	51852316	161	NA	NA	NA	296	NA	NA	NA	NA	NA	NA	NA	NA	FALSE	TRUE	NA	NA	NA	FALSE	NA	NA	NA	NA	NA	NA	NA	TRUE	NA	TRUE
102897735	Arhgap24	chr5	+	102481391	102902032	1.02898e+08	36.8079	0.130365	102897709	102897930	221	Arhgap24:chr5:102897709-102897930:+	Arhgap24:8	102897735	102898035	73,97,201	3	102897435	102898035	NA	51,59,177	NA	NA	82	NA	NA	NA	55,63,182	NA	NA	160	NA	FALSE	NA	TRUE	NA	NA	FALSE	NA	NA	NA	FALSE	NA	NA	TRUE	TRUE	NA	TRUE
52567588	Arhgap5	chr12	+	52504016	52575307	5.25675e+07	166.808	0.298253	52566968	52567969	1001	Arhgap5:chr12:52566968-52567969:+	Arhgap5:15	52567588	52567888	105254264	3	52567288	52567888	96	NA	NA	NA	87	NA	203	NA	NA	NA	264268	NA	NA	FALSE	TRUE	NA	NA	NA	FALSE	NA	FALSE	NA	NA	NA	FALSE	NA	TRUE	NA	TRUE
52574061	Arhgap5	chr12	+	52504016	52575307	5.25741e+07	34.9335	0.441693	52573962	52574172	210	Arhgap5:chr12:52573962-52574172:+	Arhgap5:17	52574061	52574361	59,71	2	52573761	52574361	85	72	NA	NA	NA	NA	176	NA	NA	42160	155269	NA	NA	FALSE	FALSE	FALSE	NA	NA	NA	NA	TRUE	NA	NA	TRUE	TRUE	NA	TRUE	NA	TRUE
95054952	Arhgef9	chrX	-	95048826	95196821	9.5055e+07	21.7549	1	95054901	95055031	130	Arhgef9:chrX:95054901-95055031:-	Arhgef9:4	95054652	95054952		NA	95054652	95055252	NA	NA	NA	232	NA	NA	NA	NA	NA	NA	280	161236241	NA	FALSE	NA	NA	NA	FALSE	NA	NA	NA	NA	NA	NA	FALSE	TRUE	TRUE	NA	TRUE
5343885	Arid1b	chr17	+	4995074	5347656	5.34388e+06	83.5638	0.083625	5343633	5344134	501	Arid1b:chr17:5343633-5344134:+	Arid1b:26	5343885	5344185		NA	5343585	5344185	147	281	NA	NA	22	NA	NA	NA	NA	235	209215	219241245	NA	FALSE	TRUE	FALSE	NA	NA	FALSE	NA	NA	NA	NA	FALSE	FALSE	FALSE	TRUE	NA	TRUE
88699070	Arl4c	chr1	-	88673127	88702221	8.86991e+07	58.6997	1	88698907	88699259	352	Arl4c:chr1:88698907-88699259:-	Arl4c:3	88698770	88699070		NA	88698770	88699370	NA	NA	NA	NA	161	NA	NA	NA	245	NA	NA	NA	NA	FALSE	NA	NA	NA	NA	TRUE	NA	NA	NA	FALSE	NA	NA	NA	TRUE	NA	TRUE
118120404	Arl6ip1	chr7	-	118118501	118129662	1.1812e+08	14.1046	0.0458586	118120351	118120436	85	Arl6ip1:chr7:118120351-118120436:-	Arl6ip1:2	118120104	118120404	252214	2	118120104	118120704	NA	NA	71	NA	NA	NA	20	NA	NA	NA	94,99	75	NA	FALSE	NA	NA	FALSE	NA	NA	NA	FALSE	NA	NA	NA	TRUE	FALSE	TRUE	NA	TRUE
21660615	Armc10	chr5	+	21645879	21665015	2.16606e+07	23.6463	1	21660526	21660668	142	Armc10:chr5:21660526-21660668:+	Armc10:3	21660615	21660915		NA	21660315	21660915	140212	NA	NA	NA	NA	NA	NA	NA	NA	NA	NA	NA	NA	FALSE	TRUE	NA	NA	NA	NA	NA	NA	NA	NA	NA	NA	NA	TRUE	NA	TRUE
21661549	Armc10	chr5	+	21645879	21665015	2.16615e+07	100.018	0.550099	21661208	21661808	600	Armc10:chr5:21661208-21661808:+	Armc10:4	21661549	21661849	68,207,68,207	4	21661249	21661849	147	NA	NA	NA	NA	NA	NA	NA	NA	52181	NA	NA	NA	FALSE	TRUE	NA	NA	NA	NA	NA	NA	NA	NA	FALSE	NA	NA	TRUE	NA	TRUE
42000178	Armc2	chr10	-	41914990	42018436	4.20002e+07	122.25	0.231605	41999811	42000544	733	Armc2:chr10:41999811-42000544:-	Armc2:4	41999878	42000178	62,10	2	41999878	42000478	155	28	NA	NA	NA	NA	NA	NA	NA	NA	NA	NA	NA	FALSE	TRUE	FALSE	NA	NA	NA	NA	NA	NA	NA	NA	NA	NA	TRUE	NA	TRUE
112065542	Arpp21	chr9	-	112065091	112217351	1.12065e+08	96.7578	0.290376	112065197	112065778	581	Arpp21:chr9:112065197-112065778:-	Arpp21:1	112065242	112065542	284	1	112065242	112065842	117226	131	NA	NA	NA	NA	136	NA	123	264	NA	NA	NA	FALSE	TRUE	TRUE	NA	NA	NA	NA	TRUE	NA	TRUE	FALSE	NA	NA	TRUE	NA	TRUE
112160144	Arpp21	chr9	-	112065091	112217351	112160144	74.2615	0.85825	112159921	112160366	445	Arpp21:chr9:112159921-112160366:-	Arpp21:17	112159844	112160144		NA	112159844	112160444	86	NA	NA	NA	NA	NA	NA	NA	NA	NA	1.20128e+32	NA	NA	FALSE	FALSE	NA	NA	NA	NA	NA	NA	NA	NA	NA	TRUE	NA	TRUE	NA	TRUE
112160224	Arpp21	chr9	-	112065091	112217351	112160224	134.889	0.0906292	112159819	112160628	809	Arpp21:chr9:112159819-112160628:-	Arpp21:17	112159924	112160224		NA	112159924	112160524	166	NA	NA	NA	NA	NA	NA	NA	NA	NA	2.00208e+32	26	NA	FALSE	TRUE	NA	NA	NA	NA	NA	NA	NA	NA	NA	FALSE	FALSE	TRUE	NA	TRUE
68739411	Arrdc4	chr7	-	68736994	68749241	6.87392e+07	43.0097	0.116738	68739078	68739336	258	Arrdc4:chr7:68739078-68739336:-	Arrdc4:2	68739111	68739411		NA	68739111	68739711	134	NA	NA	NA	NA	NA	NA	59	NA	NA	NA	NA	NA	FALSE	TRUE	NA	NA	NA	NA	NA	NA	FALSE	NA	NA	NA	NA	TRUE	NA	TRUE
68739522	Arrdc4	chr7	-	68736994	68749241	6.87394e+07	63.4168	0.883262	68739249	68739629	380	Arrdc4:chr7:68739249-68739629:-	Arrdc4:2	68739222	68739522		NA	68739222	68739822	245	NA	NA	NA	NA	NA	NA	170	NA	NA	NA	NA	NA	FALSE	FALSE	NA	NA	NA	NA	NA	NA	TRUE	NA	NA	NA	NA	TRUE	NA	TRUE
76062060	Arsk	chr13	-	76060422	76098660	76062060	33.9751	0.0394784	76061958	76062161	203	Arsk:chr13:76061958-76062161:-	Arsk:2	76061760	76062060	259,66,42,10	4	76061760	76062360	122	NA	NA	NA	NA	NA	NA	38	NA	NA	NA	NA	NA	FALSE	TRUE	NA	NA	NA	NA	NA	NA	FALSE	NA	NA	NA	NA	TRUE	NA	TRUE
135994416	Arxes2	chrX	+	135993824	135996050	1.35994e+08	65.5056	1	135994206	135994599	393	Arxes2:chrX:135994206-135994599:+	Arxes2:1	135994416	135994716	273	1	135994116	135994716	191	NA	NA	NA	NA	NA	NA	NA	NA	NA	128	NA	NA	FALSE	FALSE	NA	NA	NA	NA	NA	NA	NA	NA	NA	TRUE	NA	TRUE	NA	TRUE
66647232	Asb7	chr7	-	66644471	66689596	6.66473e+07	85.2024	0.320322	66647050	66647561	511	Asb7:chr7:66647050-66647561:-	Asb7:3	66646932	66647232	269,205,57	3	66646932	66647532	81169204227	NA	NA	NA	NA	NA	NA	NA	NA	NA	NA	174234239245	NA	FALSE	TRUE	NA	NA	NA	NA	NA	NA	NA	NA	NA	NA	TRUE	TRUE	NA	TRUE
60098204	Ascc1	chr10	+	60003327	60101842	6.00982e+07	30.807	1	60098088	60098273	185	Ascc1:chr10:60098088-60098273:+	Ascc1:1	60098204	60098504	10	1	60097904	60098504	NA	NA	NA	173	227	NA	NA	NA	NA	NA	NA	NA	NA	FALSE	NA	NA	NA	TRUE	FALSE	NA	NA	NA	NA	NA	NA	NA	TRUE	NA	TRUE
50852535	Ascc3	chr10	+	50592669	50855891	5.08525e+07	58.4615	1	50852346	50852697	351	Ascc3:chr10:50852346-50852697:+	Ascc3:27	50852535	50852835		NA	50852235	50852835	NA	NA	NA	141	NA	NA	NA	NA	NA	146	246	150	NA	FALSE	NA	NA	NA	TRUE	NA	NA	NA	NA	NA	TRUE	FALSE	TRUE	TRUE	NA	TRUE
87491138	Ascl1	chr10	-	87490819	87493660	8.74913e+07	72.4954	0.0479072	87491034	87491469	435	Ascl1:chr10:87491034-87491469:-	Ascl1:1	87490838	87491138		NA	87490838	87491438	NA	294	NA	NA	76	NA	NA	NA	NA	272	NA	99	NA	FALSE	NA	FALSE	NA	NA	FALSE	NA	NA	NA	NA	FALSE	NA	TRUE	TRUE	NA	TRUE
87491204	Ascl1	chr10	-	87490819	87493660	8.74912e+07	54.2547	0.0785766	87491017	87491342	325	Ascl1:chr10:87491017-87491342:-	Ascl1:1	87490904	87491204		NA	87490904	87491504	NA	NA	NA	NA	142	NA	NA	NA	NA	NA	NA	165	NA	FALSE	NA	NA	NA	NA	TRUE	NA	NA	NA	NA	NA	NA	TRUE	TRUE	NA	TRUE
87491469	Ascl1	chr10	-	87490819	87493660	8.74915e+07	50.4447	0.101805	87491315	87491618	303	Ascl1:chr10:87491315-87491618:-	Ascl1:1	87491169	87491469		NA	87491169	87491769	190	NA	NA	NA	NA	NA	NA	NA	NA	NA	80145	NA	NA	FALSE	FALSE	NA	NA	NA	NA	NA	NA	NA	NA	NA	TRUE	NA	TRUE	NA	TRUE
89077624	Ash1l	chr3	+	88950622	89079380	8.90776e+07	71.7989	1	89077386	89077817	431	Ash1l:chr3:89077386-89077817:+	Ash1l:30	89077624	89077924	231	1	89077324	89077924	NA	NA	NA	188	NA	NA	NA	NA	NA	NA	161165	213	NA	FALSE	NA	NA	NA	FALSE	NA	NA	NA	NA	NA	NA	TRUE	FALSE	TRUE	NA	TRUE
89078677	Ash1l	chr3	+	88950622	89079380	8.90787e+07	84.5333	0.116485	89078428	89078935	507	Ash1l:chr3:89078428-89078935:+	Ash1l:31	89078677	89078977	213	1	89078377	89078977	194	NA	NA	NA	151283	NA	186	NA	NA	NA	131142202206	NA	NA	FALSE	FALSE	NA	NA	NA	TRUE	NA	FALSE	NA	NA	NA	TRUE	NA	TRUE	NA	TRUE
139493797	Aspm	chr1	+	139454775	139494091	1.39494e+08	41.6728	0.197862	139493655	139493905	250	Aspm:chr1:139493655-139493905:+	Aspm:9	139493797	139494091	87293	2	139493497	139494097	142	NA	276	NA	78	NA	87	100	NA	63	NA	NA	NA	FALSE	TRUE	NA	FALSE	NA	FALSE	NA	FALSE	TRUE	NA	FALSE	NA	NA	TRUE	NA	TRUE
3503477	Asxl2	chr12	+	3426857	3516725	3.50349e+06	45.4297	0.354769	3503354	3503627	273	Asxl2:chr12:3503354-3503627:+	Asxl2:17	3503477	3503777	29,219,29,219	4	3503177	3503777	NA	NA	NA	NA	NA	211	NA	NA	10	198202	NA	173	NA	FALSE	NA	NA	NA	NA	NA	FALSE	NA	NA	FALSE	FALSE	NA	TRUE	TRUE	NA	TRUE
3503751	Asxl2	chr12	+	3426857	3516725	3.50374e+06	33.5737	0.140667	3503640	3503842	202	Asxl2:chr12:3503640-3503842:+	Asxl2:17	3503751	3504051		NA	3503451	3504051	137294	NA	NA	121	NA	NA	NA	NA	NA	NA	125153	NA	NA	FALSE	TRUE	NA	NA	TRUE	NA	NA	NA	NA	NA	NA	TRUE	NA	TRUE	NA	TRUE
3504380	Asxl2	chr12	+	3426857	3516725	3.50451e+06	112.549	0.344493	3504175	3504851	676	Asxl2:chr12:3504175-3504851:+	Asxl2:18	3504380	3504680		NA	3504080	3504680	63	NA	NA	NA	NA	NA	NA	NA	NA	NA	128150210	NA	NA	FALSE	FALSE	NA	NA	NA	NA	NA	NA	NA	NA	NA	TRUE	NA	TRUE	NA	TRUE
3511781	Asxl2	chr12	+	3426857	3516725	3.51179e+06	28.3921	0.521653	3511703	3511873	170	Asxl2:chr12:3511703-3511873:+	Asxl2:20	3511781	3512081	53	1	3511481	3512081	NA	109	NA	NA	NA	NA	NA	NA	105204213	94	NA	NA	8,9,10,11,12,13,14,15,16,17,18,19,20,21,22,23,24,25,26,27,28,29,30,31,32,33,34,35,36,37,38,39,40,41,42	FALSE	NA	TRUE	NA	NA	NA	NA	NA	NA	TRUE	TRUE	NA	NA	TRUE	FALSE	TRUE
22529655	Asxl3	chr18	+	22345089	22530227	2.25297e+07	64.7414	0.213497	22529498	22529887	389	Asxl3:chr18:22529498-22529887:+	Asxl3:18	22529655	22529955	223	1	22529355	22529955	NA	199	NA	NA	NA	NA	79	NA	NA	206	112	NA	NA	FALSE	NA	FALSE	NA	NA	NA	NA	FALSE	NA	NA	FALSE	TRUE	NA	TRUE	NA	TRUE
114860330	Atg7	chr6	+	114643097	114862063	1.1486e+08	94.6121	0.135463	114860067	114860635	568	Atg7:chr6:114860067-114860635:+	Atg7:10	114860330	114860630	21204282	3	114860030	114860630	252	266	NA	NA	157	NA	NA	129	NA	NA	NA	5121178	NA	FALSE	FALSE	FALSE	NA	NA	TRUE	NA	NA	TRUE	NA	NA	NA	TRUE	TRUE	NA	TRUE
116963241	Atmin	chr8	+	116943393	116964593	1.16963e+08	73.7612	1	116963034	116963476	442	Atmin:chr8:116963034-116963476:+	Atmin:6	116963241	116963541		NA	116962941	116963541	100	NA	NA	NA	NA	NA	NA	NA	NA	NA	NA	NA	NA	FALSE	TRUE	NA	NA	NA	NA	NA	NA	NA	NA	NA	NA	NA	TRUE	NA	TRUE
172274173	Atp1a2	chr1	-	172271581	172298064	1.72274e+08	66.5883	0.720619	172274000	172274400	400	Atp1a2:chr1:172274000-172274400:-	Atp1a2:3	172273873	172274173	294,109,89,59	4	172273873	172274473	NA	NA	NA	NA	NA	NA	NA	NA	NA	NA	1.00104e+71	NA	NA	FALSE	NA	NA	NA	NA	NA	NA	NA	NA	NA	NA	TRUE	NA	TRUE	NA	TRUE
164438333	Atp1b1	chr1	-	164437090	164458355	1.64438e+08	85.676	0.275268	164438074	164438588	514	Atp1b1:chr1:164438074-164438588:-	Atp1b1:2	164438033	164438333	284,249,212,104,67	5	164438033	164438633	211	NA	NA	NA	NA	NA	NA	NA	NA	267	261	129230	NA	FALSE	FALSE	NA	NA	NA	NA	NA	NA	NA	NA	FALSE	FALSE	TRUE	TRUE	NA	TRUE
105412405	Atp2c1	chr9	-	105403539	105521147	1.05412e+08	53.2516	0.0984398	105412252	105412571	319	Atp2c1:chr9:105412252-105412571:-	Atp2c1:1	105412105	105412405	270,210,15	3	105412105	105412705	174	248	NA	NA	NA	NA	NA	NA	NA	NA	NA	NA	NA	FALSE	TRUE	FALSE	NA	NA	NA	NA	NA	NA	NA	NA	NA	NA	TRUE	NA	TRUE
10056792	Atp5c1	chr2	-	10056011	10080444	1.00568e+07	13.3089	1	10056748	10056828	80	Atp5c1:chr2:10056748-10056828:-	Atp5c1:2	10056492	10056792	22	1	10056492	10057092	NA	NA	NA	NA	NA	NA	NA	NA	NA	122	NA	56	NA	FALSE	NA	NA	NA	NA	NA	NA	NA	NA	NA	TRUE	NA	FALSE	TRUE	NA	TRUE
96073193	Atp5g1	chr11	-	96068852	96075670	96073193	18.9027	0.330086	96073136	96073249	113	Atp5g1:chr11:96073136-96073249:-	Atp5g1:1	96072893	96073193	204	1	96072893	96073493	NA	NA	NA	NA	170	NA	NA	NA	NA	NA	NA	NA	NA	FALSE	NA	NA	NA	NA	TRUE	NA	NA	NA	NA	NA	NA	NA	TRUE	NA	TRUE
47085970	Atp5md	chr19	-	47083387	47090643	47085970	35.3707	0.814987	47085863	47086076	213	Atp5md:chr19:47085863-47086076:-	Atp5md:2	47085670	47085970	15,103,15	3	47085670	47086270	102	NA	NA	9	NA	NA	NA	NA	NA	84	125	NA	NA	FALSE	TRUE	NA	NA	FALSE	NA	NA	NA	NA	NA	FALSE	TRUE	NA	TRUE	NA	TRUE
115811485	Atpaf1	chr4	+	115784814	115814293	1.15812e+08	170.075	0.17467	115811068	115812088	1020	Atpaf1:chr4:115811068-115812088:+	Atpaf1:5	115811485	115811785		NA	115811185	115811785	NA	NA	NA	115	NA	NA	NA	NA	NA	250	NA	NA	NA	FALSE	NA	NA	NA	TRUE	NA	NA	NA	NA	NA	FALSE	NA	NA	TRUE	NA	TRUE
45552853	Atxn1	chr13	-	45548865	45964976	4.55529e+07	55.5902	1	45552686	45553020	334	Atxn1:chr13:45552686-45553020:-	Atxn1:2	45552553	45552853		NA	45552553	45553153	NA	NA	NA	NA	NA	NA	NA	NA	124180	NA	171	NA	NA	FALSE	NA	NA	NA	NA	NA	NA	NA	NA	TRUE	NA	TRUE	NA	TRUE	NA	TRUE
101932978	Atxn3	chr12	-	101918901	101958246	1.01933e+08	32.4331	1	101932905	101933100	195	Atxn3:chr12:101932905-101933100:-	Atxn3:6	101932678	101932978	54,54,29,22	4	101932678	101933278	NA	70	188208	NA	30	11	NA	NA	109	NA	NA	NA	NA	FALSE	NA	FALSE	FALSE	NA	FALSE	FALSE	NA	NA	TRUE	NA	NA	NA	TRUE	NA	TRUE
33328642	Atxn7l1	chr12	+	33147693	33376429	3.33286e+07	73.6174	1	33328417	33328859	442	Atxn7l1:chr12:33328417-33328859:+	Atxn7l1:15	33328642	33328942	207207	2	33328342	33328942	NA	NA	NA	NA	182	NA	NA	NA	NA	138	1.95207e+17	NA	NA	FALSE	NA	NA	NA	NA	FALSE	NA	NA	NA	NA	TRUE	FALSE	NA	TRUE	NA	TRUE
112928014	Atxn7l3b	chr10	-	112923783	112928995	1.12928e+08	73.3835	0.0510707	112927794	112928235	441	Atxn7l3b:chr10:112927794-112928235:-	Atxn7l3b:3	112927714	112928014		NA	112927714	112928314	NA	NA	NA	NA	NA	NA	162	NA	NA	NA	NA	NA	NA	FALSE	NA	NA	NA	NA	NA	NA	TRUE	NA	NA	NA	NA	NA	TRUE	NA	TRUE
82152857	AU041133	chr10	+	82128013	82155562	8.21529e+07	58.6925	0.403777	82152688	82153040	352	AU041133:chr10:82152688-82153040:+	AU041133:6	82152857	82153157	3,81,208	3	82152557	82153157	247283	NA	NA	167	138	NA	NA	NA	NA	188	142	NA	NA	FALSE	FALSE	NA	NA	TRUE	TRUE	NA	NA	NA	NA	FALSE	TRUE	NA	TRUE	NA	TRUE
82153056	AU041133	chr10	+	82128013	82155562	8.21528e+07	81.6046	0.0837106	82152544	82153033	489	AU041133:chr10:82152544-82153033:+	AU041133:6	82153056	82153356	9	1	82152756	82153356	48,84,100	NA	NA	NA	NA	NA	NA	NA	NA	NA	264271292	275279283287	NA	FALSE	TRUE	NA	NA	NA	NA	NA	NA	NA	NA	NA	FALSE	FALSE	TRUE	NA	TRUE
82153175	AU041133	chr10	+	82128013	82155562	8.21531e+07	75.3519	0.138049	82152910	82153362	452	AU041133:chr10:82152910-82153362:+	AU041133:6	82153175	82153475		NA	82152875	82153475	257	NA	NA	NA	NA	NA	210	NA	NA	NA	145152173180	156160164168	NA	FALSE	FALSE	NA	NA	NA	NA	NA	FALSE	NA	NA	NA	TRUE	TRUE	TRUE	NA	TRUE
56758526	Avl9	chr6	+	56714927	56762681	5.67585e+07	47.6885	0.286407	56758364	56758650	286	Avl9:chr6:56758364-56758650:+	Avl9:12	56758526	56758826		NA	56758226	56758826	NA	NA	NA	NA	NA	NA	NA	157183	NA	NA	178	NA	NA	FALSE	NA	NA	NA	NA	NA	NA	NA	TRUE	NA	NA	TRUE	NA	TRUE	NA	TRUE
51827145	AY358078	chr14	+	51800046	51828547	5.18272e+07	38.9973	1	51827036	51827270	234	AY358078:chr14:51827036-51827270:+	AY358078:3	51827145	51827445	30	1	51826845	51827445	NA	147	NA	248	NA	NA	NA	NA	NA	NA	NA	NA	NA	FALSE	NA	TRUE	NA	FALSE	NA	NA	NA	NA	NA	NA	NA	NA	TRUE	NA	TRUE
118063205	Azi2	chr9	+	118040499	118065114	118063205	74.3036	0.0467934	118062982	118063427	445	Azi2:chr9:118062982-118063427:+	Azi2:8	118063205	118063505	295	1	118062905	118063505	NA	NA	NA	132	NA	NA	NA	68	NA	NA	189	137	NA	FALSE	NA	NA	NA	TRUE	NA	NA	NA	FALSE	NA	NA	FALSE	TRUE	TRUE	NA	TRUE
97841537	B230217C12Rik	chr11	+	97840780	97847053	9.78418e+07	17.1354	0.0142535	97841757	97841860	103	B230217C12Rik:chr11:97841757-97841860:+	B230217C12Rik:1	97841537	97841837	10,27	2	97841237	97841837	167	222	NA	NA	47	208	NA	60	220	188212216226	66138	NA	49,50	FALSE	TRUE	FALSE	NA	NA	FALSE	FALSE	NA	FALSE	FALSE	FALSE	TRUE	NA	TRUE	FALSE	TRUE
97845298	B230217C12Rik	chr11	+	97840780	97847053	9.78453e+07	35.257	1	97845162	97845373	211	B230217C12Rik:chr11:97845162-97845373:+	B230217C12Rik:3	97845298	97845598		NA	97844998	97845598	107258	NA	NA	NA	NA	NA	NA	NA	NA	NA	NA	NA	NA	FALSE	TRUE	NA	NA	NA	NA	NA	NA	NA	NA	NA	NA	NA	TRUE	NA	TRUE
55700203	B230219D22Rik	chr13	+	55693124	55703514	5.57002e+07	73.0375	0.105354	55699963	55700402	439	B230219D22Rik:chr13:55699963-55700402:+	B230219D22Rik:3	55700203	55700503		NA	55699903	55700503	NA	NA	NA	NA	NA	NA	NA	NA	242	NA	NA	161167173179	NA	FALSE	NA	NA	NA	NA	NA	NA	NA	NA	FALSE	NA	NA	TRUE	TRUE	NA	TRUE
55700270	B230219D22Rik	chr13	+	55693124	55703514	5.57008e+07	107.044	0.355825	55700507	55701149	642	B230219D22Rik:chr13:55700507-55701149:+	B230219D22Rik:3	55700270	55700570	281	1	55699970	55700570	268	NA	NA	NA	NA	NA	NA	NA	175	NA	NA	94100106112	NA	FALSE	FALSE	NA	NA	NA	NA	NA	NA	NA	TRUE	NA	NA	TRUE	TRUE	NA	TRUE
98016467	B230307C23Rik	chr16	+	97997315	98031801	9.80164e+07	93.2965	0.104435	98016091	98016651	560	B230307C23Rik:chr16:98016091-98016651:+	B230307C23Rik:8	98016467	98016767	288288	2	98016167	98016767	NA	NA	NA	10	271	NA	25	NA	44,99	NA	165	NA	NA	FALSE	NA	NA	NA	FALSE	FALSE	NA	FALSE	NA	TRUE	NA	TRUE	NA	TRUE	NA	TRUE
98031503	B230307C23Rik	chr16	+	97997315	98031801	9.80314e+07	105.587	0.359276	98031079	98031713	634	B230307C23Rik:chr16:98031079-98031713:+	B230307C23Rik:14	98031503	98031801	298	1	98031203	98031803	NA	NA	NA	NA	143	NA	NA	NA	NA	NA	134	NA	NA	FALSE	NA	NA	NA	NA	TRUE	NA	NA	NA	NA	NA	TRUE	NA	TRUE	NA	TRUE
68119085	B3galt1	chr2	+	68117713	68122882	6.81191e+07	75.2374	1	68118864	68119315	451	B3galt1:chr2:68118864-68119315:+	B3galt1:1	68119085	68119385		NA	68118785	68119385	NA	NA	123	NA	NA	NA	NA	NA	NA	209	NA	NA	NA	FALSE	NA	NA	TRUE	NA	NA	NA	NA	NA	NA	FALSE	NA	NA	TRUE	NA	TRUE
143648114	B3galt2	chr1	+	143640664	143654614	1.43648e+08	37.3882	0.07325	143648024	143648249	225	B3galt2:chr1:143648024-143648249:+	B3galt2:4	143648114	143648414	2	1	143647814	143648414	40103226	NA	NA	NA	NA	NA	NA	NA	NA	NA	185	NA	NA	FALSE	TRUE	NA	NA	NA	NA	NA	NA	NA	NA	NA	FALSE	NA	TRUE	NA	TRUE
143648499	B3galt2	chr1	+	143640664	143654614	1.43649e+08	66.7133	0.0379038	143648302	143648702	400	B3galt2:chr1:143648302-143648702:+	B3galt2:4	143648499	143648799	231275	2	143648199	143648799	122	256	NA	NA	NA	NA	NA	NA	84	208	NA	136	NA	FALSE	TRUE	FALSE	NA	NA	NA	NA	NA	NA	FALSE	FALSE	NA	TRUE	TRUE	NA	TRUE
143650726	B3galt2	chr1	+	143640664	143654614	1.43651e+08	65.9973	1	143650521	143650917	396	B3galt2:chr1:143650521-143650917:+	B3galt2:5	143650726	143651026		NA	143650426	143651026	168	196	NA	NA	NA	149	NA	153	NA	158	172	NA	NA	FALSE	TRUE	FALSE	NA	NA	NA	TRUE	NA	TRUE	NA	TRUE	TRUE	NA	TRUE	NA	TRUE
23817617	B3gat2	chr1	+	23761753	23849158	2.38176e+07	66.7555	1	23817423	23817823	400	B3gat2:chr1:23817423-23817823:+	B3gat2:4	23817617	23817917		NA	23817317	23817917	NA	NA	NA	NA	NA	NA	NA	157221253	NA	173	161	270	NA	FALSE	NA	NA	NA	NA	NA	NA	NA	TRUE	NA	TRUE	TRUE	FALSE	TRUE	NA	TRUE
23845526	B3gat2	chr1	+	23761753	23849158	2.38455e+07	30.047	0.250432	23845430	23845610	180	B3gat2:chr1:23845430-23845610:+	B3gat2:5	23845526	23845826	15,97,109,295	4	23845226	23845826	NA	NA	NA	155180	205	NA	NA	NA	119	77,90	NA	NA	NA	FALSE	NA	NA	NA	TRUE	FALSE	NA	NA	NA	TRUE	TRUE	NA	NA	TRUE	NA	TRUE
19770842	B3gnt5	chr16	+	19760234	19772888	1.97708e+07	95.0295	0.0768492	19770517	19771087	570	B3gnt5:chr16:19770517-19771087:+	B3gnt5:3	19770842	19771142		NA	19770542	19771142	30,94	NA	36	NA	NA	NA	NA	75	NA	235	NA	NA	NA	FALSE	TRUE	NA	FALSE	NA	NA	NA	NA	FALSE	NA	FALSE	NA	NA	TRUE	NA	TRUE
19771400	B3gnt5	chr16	+	19760234	19772888	1.97711e+07	26.2569	0.00165601	19771047	19771204	157	B3gnt5:chr16:19771047-19771204:+	B3gnt5:3	19771400	19771700		NA	19771100	19771700	277	NA	NA	NA	25	NA	241	130	NA	NA	NA	NA	NA	FALSE	FALSE	NA	NA	NA	FALSE	NA	FALSE	TRUE	NA	NA	NA	NA	TRUE	NA	TRUE
19771462	B3gnt5	chr16	+	19760234	19772888	1.97714e+07	94.7141	0.0568159	19771157	19771725	568	B3gnt5:chr16:19771157-19771725:+	B3gnt5:3	19771462	19771762		NA	19771162	19771762	215	NA	NA	NA	NA	NA	179	68	NA	NA	NA	NA	NA	FALSE	FALSE	NA	NA	NA	NA	NA	TRUE	FALSE	NA	NA	NA	NA	TRUE	NA	TRUE
105252744	B3gnt9	chr8	-	105252638	105255153	1.05253e+08	68.5825	0.988172	105252638	105252998	360	B3gnt9:chr8:105252638-105252998:-	B3gnt9:1	105252638	105252744	106,35	2	105252444	105253044	NA	NA	98	NA	87	NA	NA	NA	NA	NA	NA	NA	NA	FALSE	NA	NA	TRUE	NA	FALSE	NA	NA	NA	NA	NA	NA	NA	TRUE	NA	TRUE
87732860	Bach1	chr16	+	87698945	87733670	8.77334e+07	31.353	0.00468207	87733333	87733521	188	Bach1:chr16:87733333-87733521:+	Bach1:7	87732860	87733160	61265	2	87732560	87733160	204	NA	NA	NA	NA	NA	165	NA	290	244	56	248	NA	FALSE	FALSE	NA	NA	NA	NA	NA	TRUE	NA	FALSE	FALSE	FALSE	FALSE	TRUE	NA	TRUE
118924189	Bahd1	chr2	+	118901453	118924528	1.18924e+08	83.6898	0.0967369	118923977	118924479	502	Bahd1:chr2:118923977-118924479:+	Bahd1:1	118924189	118924489	288	1	118923889	118924489	NA	NA	NA	NA	NA	NA	NA	NA	158	NA	NA	NA	NA	FALSE	NA	NA	NA	NA	NA	NA	NA	NA	TRUE	NA	NA	NA	TRUE	NA	TRUE
54893836	Baz1a	chr12	-	54892250	54986336	5.48938e+07	107.513	0.220932	54893454	54894099	645	Baz1a:chr12:54893454-54894099:-	Baz1a:2	54893536	54893836	283,260,250,227,65	5	54893536	54894136	132182	96	NA	NA	NA	NA	NA	NA	NA	188264	NA	NA	NA	FALSE	TRUE	TRUE	NA	NA	NA	NA	NA	NA	NA	FALSE	NA	NA	TRUE	NA	TRUE
59322975	Bbs4	chr9	-	59321960	59353508	59322975	56.8815	0.0986587	59322804	59323145	341	Bbs4:chr9:59322804-59323145:-	Bbs4:2	59322675	59322975		NA	59322675	59323275	NA	NA	NA	NA	232	NA	NA	NA	NA	NA	92,96	87108	NA	FALSE	NA	NA	NA	NA	FALSE	NA	NA	NA	NA	NA	TRUE	TRUE	TRUE	NA	TRUE
82110636	BC024063	chr10	+	82083353	82114852	8.21107e+07	36.3216	0.222857	82110544	82110762	218	BC024063:chr10:82110544-82110762:+	BC024063:3	82110636	82110936	281	1	82110336	82110936	NA	NA	94	NA	NA	NA	NA	NA	NA	260	NA	NA	NA	FALSE	NA	NA	TRUE	NA	NA	NA	NA	NA	NA	FALSE	NA	NA	TRUE	NA	TRUE
84122373	Bckdhb	chr9	+	83948781	84128450	8.41224e+07	21.9721	1	84122293	84122424	131	Bckdhb:chr9:84122293-84122424:+	Bckdhb:2	84122373	84122673	9	1	84122073	84122673	NA	NA	NA	NA	223	174	NA	NA	NA	NA	NA	NA	NA	FALSE	NA	NA	NA	NA	FALSE	TRUE	NA	NA	NA	NA	NA	NA	TRUE	NA	TRUE
107913819	Bcl11b	chr12	-	107910396	108003602	1.07914e+08	70.9039	1	107913615	107914040	425	Bcl11b:chr12:107913615-107914040:-	Bcl11b:3	107913519	107913819	99,2	2	107913519	107914119	120172	NA	NA	NA	177	NA	NA	236	NA	244	240	155	102103104	FALSE	TRUE	NA	NA	NA	TRUE	NA	NA	FALSE	NA	FALSE	FALSE	TRUE	TRUE	FALSE	TRUE
159575019	Bclaf3	chrX	+	159532668	159593134	1.59575e+08	52.6766	0.948766	159574865	159575181	316	Bclaf3:chrX:159574865-159575181:+	Bclaf3:10	159575019	159575319	78	1	159574719	159575319	88107225	NA	NA	NA	NA	NA	NA	250	NA	44	1.4717e+32	NA	NA	FALSE	TRUE	NA	NA	NA	NA	NA	NA	FALSE	NA	FALSE	TRUE	NA	TRUE	NA	TRUE
159592681	Bclaf3	chrX	+	159532668	159593134	1.59593e+08	101.297	0.199274	159592474	159593082	608	Bclaf3:chrX:159592474-159593082:+	Bclaf3:14	159592681	159592981	275275	2	159592381	159592981	92102	NA	NA	NA	NA	NA	NA	NA	NA	NA	NA	NA	NA	FALSE	TRUE	NA	NA	NA	NA	NA	NA	NA	NA	NA	NA	NA	TRUE	NA	TRUE
149557249	Bicd1	chr6	+	149408984	149563329	1.49557e+08	65.9556	0.171194	149557065	149557460	395	Bicd1:chr6:149557065-149557460:+	Bicd1:29	149557249	149557549	276276276	3	149556949	149557549	252	NA	NA	NA	NA	183	168	NA	NA	NA	192	NA	NA	FALSE	FALSE	NA	NA	NA	NA	FALSE	TRUE	NA	NA	NA	FALSE	NA	TRUE	NA	TRUE
149563108	Bicd1	chr6	+	149408984	149563329	1.49563e+08	37.4465	0.105262	149562952	149563176	224	Bicd1:chr6:149562952-149563176:+	Bicd1:30	149563108	149563329	204221218204218	5	149562808	149563408	NA	NA	NA	NA	180	NA	NA	98108	NA	186	NA	102	NA	FALSE	NA	NA	NA	NA	TRUE	NA	NA	TRUE	NA	FALSE	NA	TRUE	TRUE	NA	TRUE
44145865	Bivm	chr1	+	44119968	44146036	4.41458e+07	176.164	1	44145264	44146036	772	Bivm:chr1:44145264-44146036:+	Bivm:4	44145865	44146036		NA	44145565	44146165	NA	NA	NA	NA	NA	NA	NA	NA	NA	147	NA	NA	NA	FALSE	NA	NA	NA	NA	NA	NA	NA	NA	NA	TRUE	NA	NA	TRUE	NA	TRUE
80453994	Blm	chr7	-	80453465	80535119	8.0454e+07	60.8378	1	80453834	80454199	365	Blm:chr7:80453834-80454199:-	Blm:1	80453694	80453994		NA	80453694	80454294	NA	NA	NA	NA	NA	NA	NA	NA	NA	147153	157	NA	NA	FALSE	NA	NA	NA	NA	NA	NA	NA	NA	NA	TRUE	TRUE	NA	TRUE	NA	TRUE
122747698	Bloc1s6	chr2	+	122738503	122750397	1.22748e+08	124.732	0.145664	122747408	122748156	748	Bloc1s6:chr2:122747408-122748156:+	Bloc1s6:4	122747698	122747998	298	1	122747398	122747998	NA	NA	147	NA	NA	NA	NA	223227	272	NA	182	NA	NA	FALSE	NA	NA	TRUE	NA	NA	NA	NA	FALSE	FALSE	NA	FALSE	NA	TRUE	NA	TRUE
133561613	Bmp2	chr2	+	133552159	133562896	1.33562e+08	70.2861	0.257887	133561410	133561831	421	Bmp2:chr2:133561410-133561831:+	Bmp2:1	133561613	133561913		NA	133561313	133561913	NA	NA	NA	NA	NA	NA	NA	41208	125260	113117121	NA	293	NA	FALSE	NA	NA	NA	NA	NA	NA	NA	FALSE	TRUE	TRUE	NA	FALSE	TRUE	NA	TRUE
98879919	Bmp3	chr5	+	98854415	98887242	9.88799e+07	58.8879	1	98879721	98880074	353	Bmp3:chr5:98879721-98880074:+	Bmp3:2	98879919	98880219	210210	2	98879619	98880219	NA	NA	NA	NA	NA	195	178	115	NA	NA	110236	119145	NA	FALSE	NA	NA	NA	NA	NA	FALSE	TRUE	TRUE	NA	NA	TRUE	TRUE	TRUE	NA	TRUE
98886919	Bmp3	chr5	+	98854415	98887242	9.88869e+07	43.5072	1	98886786	98887047	261	Bmp3:chr5:98886786-98887047:+	Bmp3:4	98886919	98887219	254	1	98886619	98887219	139158198208	NA	NA	NA	233	NA	NA	NA	NA	NA	78228	NA	NA	FALSE	TRUE	NA	NA	NA	FALSE	NA	NA	NA	NA	NA	FALSE	NA	TRUE	NA	TRUE
34412327	Bmpr1a	chr14	-	34409705	34502687	3.44124e+07	157.26	0.631999	34411932	34412876	944	Bmpr1a:chr14:34411932-34412876:-	Bmpr1a:2	34412027	34412327	220,94,31,11,220,94,31,11	8	34412027	34412627	12125157	NA	NA	NA	165	NA	NA	NA	NA	171200	NA	NA	NA	FALSE	TRUE	NA	NA	NA	TRUE	NA	NA	NA	NA	TRUE	NA	NA	TRUE	NA	TRUE
185356724	Bpnt1	chr1	+	185332149	185359919	1.85357e+08	50.9862	0.433652	185356626	185356932	306	Bpnt1:chr1:185356626-185356932:+	Bpnt1:3	185356724	185357024	57,85	2	185356424	185357024	NA	NA	NA	NA	37	NA	NA	NA	NA	NA	NA	115237	NA	FALSE	NA	NA	NA	NA	FALSE	NA	NA	NA	NA	NA	NA	TRUE	TRUE	NA	TRUE
140719090	Brat1	chr5	+	140705011	140719379	1.40719e+08	35.6032	0.0866371	140718968	140719181	213	Brat1:chr5:140718968-140719181:+	Brat1:4	140719090	140719379	85,242,285,85,242,285,286	7	140718790	140719390	209285	NA	NA	NA	58227	NA	NA	NA	NA	263268	NA	133	266267	FALSE	FALSE	NA	NA	NA	FALSE	NA	NA	NA	NA	FALSE	NA	TRUE	TRUE	FALSE	TRUE
150569473	Brca2	chr5	+	150522644	150572615	1.50569e+08	107.922	0.174186	150569099	150569746	647	Brca2:chr5:150569099-150569746:+	Brca2:7	150569473	150569773	202245273	3	150569173	150569773	195	NA	NA	NA	NA	NA	170	NA	NA	249	NA	NA	NA	FALSE	FALSE	NA	NA	NA	NA	NA	TRUE	NA	NA	FALSE	NA	NA	TRUE	NA	TRUE
107386803	Brdt	chr5	+	107331159	107387067	1.07387e+08	73.5367	0.0631669	107386602	107387043	441	Brdt:chr5:107386602-107387043:+	Brdt:6	107386803	107387067	219257	2	107386503	107387103	NA	NA	NA	NA	196240	NA	NA	NA	NA	NA	122	NA	NA	FALSE	NA	NA	NA	NA	FALSE	NA	NA	NA	NA	NA	TRUE	NA	TRUE	NA	TRUE
158245993	Brinp2	chr1	-	158245264	158356326	1.58246e+08	145.171	0.104782	158245479	158246350	871	Brinp2:chr1:158245479-158246350:-	Brinp2:1	158245693	158245993	270	1	158245693	158246293	NA	NA	NA	NA	NA	NA	NA	67	NA	NA	134	NA	NA	FALSE	NA	NA	NA	NA	NA	NA	NA	FALSE	NA	NA	TRUE	NA	TRUE	NA	TRUE
183276496	Brox	chr1	-	183276352	183296992	1.83277e+08	66.2301	1	183276352	183276710	358	Brox:chr1:183276352-183276710:-	Brox:1	183276352	183276496		NA	183276196	183276796	NA	NA	NA	NA	NA	NA	NA	NA	NA	124	NA	NA	NA	FALSE	NA	NA	NA	NA	NA	NA	NA	NA	NA	TRUE	NA	NA	TRUE	NA	TRUE
138284683	Btbd3	chr2	+	138256565	138287437	1.38285e+08	78.4218	0.838064	138284470	138284940	470	Btbd3:chr2:138284470-138284940:+	Btbd3:4	138284683	138284983	228	1	138284383	138284983	180	NA	NA	NA	NA	280293	NA	NA	NA	203207211	109	223	NA	FALSE	TRUE	NA	NA	NA	NA	FALSE	NA	NA	NA	FALSE	TRUE	FALSE	TRUE	NA	TRUE
138287055	Btbd3	chr2	+	138256565	138287437	1.38287e+08	82.5909	0.059186	138286714	138287210	496	Btbd3:chr2:138286714-138287210:+	Btbd3:5	138287055	138287355	240291	2	138286755	138287355	150	243	NA	NA	NA	85	NA	NA	241	NA	NA	NA	NA	FALSE	TRUE	FALSE	NA	NA	NA	FALSE	NA	NA	FALSE	NA	NA	NA	TRUE	NA	TRUE
108816625	Btf3l4	chr4	-	108814286	108833614	1.08817e+08	65.591	0.907777	108816425	108816819	394	Btf3l4:chr4:108816425-108816819:-	Btf3l4:2	108816325	108816625		NA	108816325	108816925	NA	NA	NA	NA	NA	NA	NA	NA	NA	161	NA	200	NA	FALSE	NA	NA	NA	NA	NA	NA	NA	NA	NA	TRUE	NA	FALSE	TRUE	NA	TRUE
155966351	C1qtnf12	chr4	+	155962318	155966629	155966351	165.166	0.00391841	155965855	155966629	774	C1qtnf12:chr4:155965855-155966629:+	C1qtnf12:1	155966351	155966629	244275	2	155966051	155966651	NA	NA	NA	NA	NA	NA	NA	NA	NA	251	161	NA	NA	FALSE	NA	NA	NA	NA	NA	NA	NA	NA	NA	FALSE	TRUE	NA	TRUE	NA	TRUE
124530155	C1s1	chr6	-	124529944	124542321	1.2453e+08	15.8821	0.0655226	124530384	124530479	95	C1s1:chr6:124530384-124530479:-	C1s1:1	124529944	124530155	205	1	124529855	124530455	NA	NA	NA	NA	NA	NA	NA	139	NA	185	NA	9.71011e+19	NA	FALSE	NA	NA	NA	NA	NA	NA	NA	TRUE	NA	FALSE	NA	TRUE	TRUE	NA	TRUE
36848972	C330007P06Rik	chrX	-	36823730	36864246	3.68488e+07	97.4193	0.144566	36848542	36849126	584	C330007P06Rik:chrX:36848542-36849126:-	C330007P06Rik:7	36848672	36848972		NA	36848672	36849272	NA	238	NA	NA	NA	NA	NA	15	NA	161	293	NA	NA	FALSE	NA	FALSE	NA	NA	NA	NA	NA	FALSE	NA	TRUE	FALSE	NA	TRUE	NA	TRUE
36850493	C330007P06Rik	chrX	-	36823730	36864246	3.68505e+07	73.29	1	36850276	36850716	440	C330007P06Rik:chrX:36850276-36850716:-	C330007P06Rik:8	36850193	36850493		NA	36850193	36850793	NA	NA	NA	NA	NA	NA	NA	NA	NA	148	NA	236243247	NA	FALSE	NA	NA	NA	NA	NA	NA	NA	NA	NA	TRUE	NA	FALSE	TRUE	NA	TRUE
101004127	Cachd1	chr4	+	100776675	101029220	101004127	56.1483	0.0280005	101003958	101004295	337	Cachd1:chr4:101003958-101004295:+	Cachd1:24	101004127	101004427	12232256	3	101003827	101004427	126	NA	NA	NA	NA	NA	NA	NA	NA	NA	NA	NA	NA	FALSE	TRUE	NA	NA	NA	NA	NA	NA	NA	NA	NA	NA	NA	TRUE	NA	TRUE
30061291	Cacna1d	chr14	-	30037550	30491453	3.00613e+07	60.2271	1	30061110	30061471	361	Cacna1d:chr14:30061110-30061471:-	Cacna1d:3	30060991	30061291		NA	30060991	30061591	NA	NA	NA	NA	NA	156	NA	124129	NA	166170174178182	NA	NA	NA	FALSE	NA	NA	NA	NA	NA	TRUE	NA	TRUE	NA	TRUE	NA	NA	TRUE	NA	TRUE
94408504	Cacna1g	chr11	-	94408391	94474100	9.44085e+07	44.3393	0.107319	94408391	94408635	244	Cacna1g:chr11:94408391-94408635:-	Cacna1g:1	94408391	94408504	108,98	2	94408204	94408804	NA	79	NA	NA	NA	NA	NA	23	NA	84102	NA	NA	NA	FALSE	NA	FALSE	NA	NA	NA	NA	NA	FALSE	NA	TRUE	NA	NA	TRUE	NA	TRUE
16088508	Cacna2d1	chr5	+	15934691	16374797	1.60885e+07	34.7924	0.0804323	16088394	16088603	209	Cacna2d1:chr5:16088394-16088603:+	Cacna2d1:28	16088508	16088808	86220	2	16088208	16088808	NA	NA	NA	203	NA	NA	NA	69	125	61	NA	65	NA	FALSE	NA	NA	NA	FALSE	NA	NA	NA	FALSE	TRUE	FALSE	NA	FALSE	TRUE	NA	TRUE
52433450	Cacnb4	chr2	-	52428320	52676582	5.24335e+07	87.6765	1	52433213	52433739	526	Cacnb4:chr2:52433213-52433739:-	Cacnb4:3	52433150	52433450	31	1	52433150	52433750	NA	NA	NA	NA	123	NA	177	NA	164	12	NA	NA	NA	FALSE	NA	NA	NA	NA	TRUE	NA	TRUE	NA	TRUE	FALSE	NA	NA	TRUE	NA	TRUE
52434206	Cacnb4	chr2	-	52428320	52676582	5.24342e+07	58.4755	1	52434029	52434380	351	Cacnb4:chr2:52434029-52434380:-	Cacnb4:4	52433906	52434206	213	1	52433906	52434506	NA	32,90,272	NA	NA	NA	NA	NA	NA	NA	185	173189	NA	NA	FALSE	NA	TRUE	NA	NA	NA	NA	NA	NA	NA	FALSE	TRUE	NA	TRUE	NA	TRUE
77991965	Cacng2	chr15	-	77991748	78120028	7.79919e+07	39.9583	0.216881	77991764	77992003	239	Cacng2:chr15:77991764-77992003:-	Cacng2:1	77991748	77991965	210	1	77991665	77992265	132	NA	NA	NA	NA	NA	NA	NA	NA	193	141168	23,32,39,46,54,153,173	19,20,21,26,27,28,35,42,43,49,50,51	FALSE	TRUE	NA	NA	NA	NA	NA	NA	NA	NA	FALSE	TRUE	TRUE	TRUE	FALSE	TRUE
77993811	Cacng2	chr15	-	77991748	78120028	7.79938e+07	64.7039	0.623638	77993610	77993998	388	Cacng2:chr15:77993610-77993998:-	Cacng2:2	77993511	77993811	214,48,30	3	77993511	77994111	86	3	NA	NA	187	NA	NA	NA	17174	7192	43196	154158162170200	NA	FALSE	FALSE	FALSE	NA	NA	FALSE	NA	NA	NA	TRUE	FALSE	FALSE	TRUE	TRUE	NA	TRUE
77994969	Cacng2	chr15	-	77991748	78120028	7.7995e+07	29.7184	0.0591765	77994952	77995131	179	Cacng2:chr15:77994952-77995131:-	Cacng2:3	77994669	77994969	242228	2	77994669	77995269	95196	NA	113	NA	5119	NA	NA	200	72	131184208	142	22,38,99,242,249,265,276	7,8,9,10,11,237,238,245,246,247,248,249,250,251,252,253,254	FALSE	TRUE	NA	TRUE	NA	TRUE	NA	NA	FALSE	FALSE	TRUE	TRUE	TRUE	TRUE	FALSE	TRUE
66662619	Cadm2	chr16	-	66655416	67620908	6.66625e+07	117.174	0.698332	66662175	66662878	703	Cadm2:chr16:66662175-66662878:-	Cadm2:6	66662319	66662619	274	1	66662319	66662919	138	NA	NA	285	NA	NA	NA	NA	NA	249	NA	NA	NA	FALSE	TRUE	NA	NA	FALSE	NA	NA	NA	NA	NA	FALSE	NA	NA	TRUE	NA	TRUE
23409069	Cadps2	chr6	-	23262078	23839263	2.34091e+07	68.6435	1	23408872	23409284	412	Cadps2:chr6:23408872-23409284:-	Cadps2:3	23408769	23409069	244	1	23408769	23409369	NA	135	NA	247	NA	NA	NA	NA	133	139	1.43163e+62	NA	NA	FALSE	NA	TRUE	NA	FALSE	NA	NA	NA	NA	TRUE	TRUE	TRUE	NA	TRUE	NA	TRUE
15905204	Calb1	chr4	+	15881264	15908100	1.59053e+07	141.297	0.277167	15904925	15905773	848	Calb1:chr4:15904925-15905773:+	Calb1:1	15905204	15905504		NA	15904904	15905504	NA	131	NA	NA	NA	NA	NA	NA	129	NA	NA	NA	NA	FALSE	NA	TRUE	NA	NA	NA	NA	NA	NA	TRUE	NA	NA	NA	TRUE	NA	TRUE
72424402	Calr3	chr8	-	72424147	72443870	7.24244e+07	54.8412	1	72424224	72424553	329	Calr3:chr8:72424224-72424553:-	Calr3:1	72424147	72424402	237226	2	72424102	72424702	96230	NA	218	158	NA	NA	NA	NA	NA	208	NA	NA	NA	FALSE	TRUE	NA	FALSE	TRUE	NA	NA	NA	NA	NA	FALSE	NA	NA	TRUE	NA	TRUE
33193436	Camk4	chr18	+	32939158	33195767	3.31934e+07	49.6996	0.725168	33193261	33193559	298	Camk4:chr18:33193261-33193559:+	Camk4:19	33193436	33193736		NA	33193136	33193736	NA	NA	NA	NA	NA	NA	NA	NA	NA	NA	NA	158168195	NA	FALSE	NA	NA	NA	NA	NA	NA	NA	NA	NA	NA	NA	TRUE	TRUE	NA	TRUE
33195479	Camk4	chr18	+	32939158	33195767	3.31955e+07	92.0374	0.380893	33195233	33195767	534	Camk4:chr18:33195233-33195767:+	Camk4:20	33195479	33195767	215239284	3	33195179	33195779	NA	NA	NA	NA	NA	NA	144	NA	NA	266	NA	NA	NA	FALSE	NA	NA	NA	NA	NA	NA	TRUE	NA	NA	FALSE	NA	NA	TRUE	NA	TRUE
25927816	Camsap1	chr2	-	25926838	25983282	2.59278e+07	101.372	0.0760706	25927493	25928101	608	Camsap1:chr2:25927493-25928101:-	Camsap1:1	25927516	25927816		NA	25927516	25928116	NA	NA	NA	NA	110	NA	NA	NA	NA	267	30	NA	2.63264e+23	FALSE	NA	NA	NA	NA	TRUE	NA	NA	NA	NA	FALSE	FALSE	NA	TRUE	FALSE	TRUE
115805175	Cand2	chr6	+	115774538	115805557	115805175	139.688	0.0178563	115804755	115805557	802	Cand2:chr6:115804755-115805557:+	Cand2:3	115805175	115805475		NA	115804875	115805475	NA	NA	NA	NA	NA	NA	NA	NA	NA	NA	NA	90	87,88,89,90,91,92,93,94,95,96,97,98,99,100,101,102,103,104	FALSE	NA	NA	NA	NA	NA	NA	NA	NA	NA	NA	NA	TRUE	TRUE	FALSE	TRUE
115805443	Cand2	chr6	+	115774538	115805557	115805443	63.8527	0.0403717	115805251	115805557	306	Cand2:chr6:115805251-115805557:+	Cand2:3	115805443	115805557	70108	2	115805143	115805743	88	NA	NA	94	NA	NA	NA	NA	NA	NA	NA	NA	NA	FALSE	FALSE	NA	NA	TRUE	NA	NA	NA	NA	NA	NA	NA	NA	TRUE	NA	TRUE
103765252	Caprin1	chr2	-	103762941	103797649	103765252	87.9825	0.175743	103764988	103765515	527	Caprin1:chr2:103764988-103765515:-	Caprin1:1	103764952	103765252	240,93,26	3	103764952	103765552	209	NA	NA	NA	2	NA	127	NA	NA	214218	NA	NA	NA	FALSE	FALSE	NA	NA	NA	FALSE	NA	TRUE	NA	NA	FALSE	NA	NA	TRUE	NA	TRUE
104825101	Capza1	chr3	-	104822776	104864505	104825101	130.025	0.76298	104824710	104825491	781	Capza1:chr3:104824710-104825491:-	Capza1:2	104824801	104825101	204	1	104824801	104825401	NA	196	NA	NA	NA	NA	NA	NA	NA	NA	99150	200228	NA	FALSE	NA	FALSE	NA	NA	NA	NA	NA	NA	NA	NA	TRUE	FALSE	TRUE	NA	TRUE
18704121	Carnmt1	chr19	+	18670764	18707211	1.87041e+07	63.7606	0.679177	18703938	18704321	383	Carnmt1:chr19:18703938-18704321:+	Carnmt1:7	18704121	18704421	98	1	18703821	18704421	NA	NA	NA	NA	NA	41214	NA	232	181	53	NA	125	2.16217e+20	FALSE	NA	NA	NA	NA	NA	FALSE	NA	FALSE	FALSE	FALSE	NA	TRUE	TRUE	FALSE	TRUE
18704607	Carnmt1	chr19	+	18670764	18707211	1.87046e+07	77.4197	0.320823	18704371	18704835	464	Carnmt1:chr19:18704371-18704835:+	Carnmt1:7	18704607	18704907		NA	18704307	18704907	NA	94125244	NA	NA	NA	NA	NA	NA	92	158	139	NA	NA	FALSE	NA	TRUE	NA	NA	NA	NA	NA	NA	TRUE	TRUE	TRUE	NA	TRUE	NA	TRUE
13517231	Cask	chrX	-	13517080	13846541	1.35172e+07	79.9894	1	13517080	13517479	399	Cask:chrX:13517080-13517479:-	Cask:1	13517080	13517231		NA	13516931	13517531	NA	138	NA	NA	NA	NA	NA	NA	48	129	NA	NA	NA	FALSE	NA	TRUE	NA	NA	NA	NA	NA	NA	FALSE	TRUE	NA	NA	TRUE	NA	TRUE
13521984	Cask	chrX	-	13517080	13846541	1.3522e+07	99.4865	0.091558	13521713	13522310	597	Cask:chrX:13521713-13522310:-	Cask:2	13521684	13521984	201,62	2	13521684	13522284	54	NA	NA	NA	NA	NA	NA	NA	NA	41178	NA	NA	NA	FALSE	FALSE	NA	NA	NA	NA	NA	NA	NA	NA	TRUE	NA	NA	TRUE	NA	TRUE
115799463	Caskin2	chr11	-	115798986	115813630	1.15799e+08	122.669	0.324995	115799088	115799824	736	Caskin2:chr11:115799088-115799824:-	Caskin2:1	115799163	115799463	279247109	3	115799163	115799763	102	NA	NA	NA	NA	NA	NA	259	NA	NA	NA	NA	NA	FALSE	TRUE	NA	NA	NA	NA	NA	NA	FALSE	NA	NA	NA	NA	TRUE	NA	TRUE
32652982	Casp8ap2	chr4	+	32615473	32653281	32652982	137.927	0.287523	32652568	32653281	713	Casp8ap2:chr4:32652568-32653281:+	Casp8ap2:13	32652982	32653281	5,235,282,5,235,282	6	32652682	32653282	20,98	230	NA	NA	217	NA	NA	NA	NA	260	NA	NA	NA	FALSE	TRUE	FALSE	NA	NA	FALSE	NA	NA	NA	NA	FALSE	NA	NA	TRUE	NA	TRUE
17288478	Cav2	chr6	+	17281185	17289880	1.72883e+07	47.6977	0.0194822	17288121	17288407	286	Cav2:chr6:17288121-17288407:+	Cav2:2	17288478	17288778	238256238256	4	17288178	17288778	178255	NA	NA	10	NA	57	NA	NA	NA	217233	15	NA	NA	FALSE	TRUE	NA	NA	FALSE	NA	FALSE	NA	NA	NA	FALSE	FALSE	NA	TRUE	NA	TRUE
122629085	Cbfa2t3	chr8	-	122625124	122699109	1.22629e+08	73.8538	0.0377733	122628829	122629272	443	Cbfa2t3:chr8:122628829-122629272:-	Cbfa2t3:2	122628785	122629085		NA	122628785	122629385	NA	NA	NA	NA	NA	NA	NA	82	NA	NA	NA	112	NA	FALSE	NA	NA	NA	NA	NA	NA	NA	FALSE	NA	NA	NA	TRUE	TRUE	NA	TRUE
86717327	Cbln2	chr18	+	86711110	86720386	8.67173e+07	50.8632	0.117099	86717126	86717432	306	Cbln2:chr18:86717126-86717432:+	Cbln2:1	86717327	86717627	46262277	3	86717027	86717627	NA	NA	251	NA	NA	NA	NA	NA	NA	NA	278	1.64169e+17	2.66267e+17	FALSE	NA	NA	FALSE	NA	NA	NA	NA	NA	NA	NA	FALSE	TRUE	TRUE	FALSE	TRUE
51482507	Cbx3	chr6	+	51470530	51483716	5.14825e+07	42.6668	1	51482404	51482660	256	Cbx3:chr6:51482404-51482660:+	Cbx3:7	51482507	51482807		NA	51482207	51482807	NA	136	NA	NA	NA	NA	NA	191	NA	NA	NA	NA	NA	FALSE	NA	TRUE	NA	NA	NA	NA	NA	FALSE	NA	NA	NA	NA	TRUE	NA	TRUE
49340475	Ccdc126	chr6	+	49319274	49341586	4.93406e+07	147.063	0.347395	49340109	49340992	883	Ccdc126:chr6:49340109-49340992:+	Ccdc126:1	49340475	49340775	297297	2	49340175	49340775	103215	NA	NA	NA	NA	NA	NA	268	124243	248275	NA	NA	NA	FALSE	TRUE	NA	NA	NA	NA	NA	NA	FALSE	TRUE	FALSE	NA	NA	TRUE	NA	TRUE
49341249	Ccdc126	chr6	+	49319274	49341586	4.93413e+07	111.853	0.20674	49340931	49341586	655	Ccdc126:chr6:49340931-49341586:+	Ccdc126:2	49341249	49341549		NA	49340949	49341549	NA	NA	NA	NA	NA	67	NA	NA	161	NA	157218	NA	NA	FALSE	NA	NA	NA	NA	NA	FALSE	NA	NA	TRUE	NA	TRUE	NA	TRUE	NA	TRUE
116600779	Ccdc17	chr4	+	116596730	116601171	1.16601e+08	37.3653	1	116600688	116600912	224	Ccdc17:chr4:116600688-116600912:+	Ccdc17:1	116600779	116601079		NA	116600479	116601079	NA	NA	NA	NA	NA	NA	NA	NA	NA	NA	NA	118	NA	FALSE	NA	NA	NA	NA	NA	NA	NA	NA	NA	NA	NA	TRUE	TRUE	NA	TRUE
18218353	Ccdc28a	chr10	-	18213675	18234996	1.82183e+07	39.2239	1	18218223	18218459	236	Ccdc28a:chr10:18218223-18218459:-	Ccdc28a:2	18218053	18218353	204	1	18218053	18218653	NA	NA	NA	160	NA	NA	NA	NA	NA	165171	NA	NA	NA	FALSE	NA	NA	NA	TRUE	NA	NA	NA	NA	NA	TRUE	NA	NA	TRUE	NA	TRUE
5230636	Ccdc3	chr2	+	5137776	5230878	5.23063e+06	61.5291	0.471977	5230442	5230811	369	Ccdc3:chr2:5230442-5230811:+	Ccdc3:1	5230636	5230878	217242	2	5230336	5230936	NA	NA	NA	NA	NA	NA	NA	116	NA	197	235	NA	230231	FALSE	NA	NA	NA	NA	NA	NA	NA	TRUE	NA	FALSE	FALSE	NA	TRUE	FALSE	TRUE
119352459	Ccdc30	chr4	-	119322465	119415521	1.19352e+08	78.1449	1	119352198	119352667	469	Ccdc30:chr4:119352198-119352667:-	Ccdc30:4	119352159	119352459	212212	2	119352159	119352759	NA	NA	NA	NA	NA	NA	NA	NA	132	194	198	NA	NA	FALSE	NA	NA	NA	NA	NA	NA	NA	NA	TRUE	FALSE	FALSE	NA	TRUE	NA	TRUE
119372139	Ccdc30	chr4	-	119322465	119415521	1.19372e+08	45.8466	1	119372024	119372300	276	Ccdc30:chr4:119372024-119372300:-	Ccdc30:6	119371839	119372139		NA	119371839	119372439	NA	NA	NA	NA	NA	NA	NA	NA	NA	NA	NA	84,89,94,99,104,109	NA	FALSE	NA	NA	NA	NA	NA	NA	NA	NA	NA	NA	NA	TRUE	TRUE	NA	TRUE
27439592	Ccdc50	chr16	+	27388869	27452218	27439592	55.7521	0.0489199	27439424	27439759	335	Ccdc50:chr16:27439424-27439759:+	Ccdc50:12	27439592	27439892	77	1	27439292	27439892	NA	NA	NA	NA	80105	71	NA	NA	NA	292	92,96,288	266273278	83,84,85,261,262	FALSE	NA	NA	NA	NA	TRUE	FALSE	NA	NA	NA	FALSE	TRUE	FALSE	TRUE	FALSE	TRUE
27448135	Ccdc50	chr16	+	27388869	27452218	2.74483e+07	52.7357	0.00649167	27448187	27448503	316	Ccdc50:chr16:27448187-27448503:+	Ccdc50:15	27448135	27448435	70,93,256,279	4	27447835	27448435	77,92	NA	NA	NA	NA	NA	NA	NA	229	NA	NA	NA	NA	FALSE	TRUE	NA	NA	NA	NA	NA	NA	NA	FALSE	NA	NA	NA	TRUE	NA	TRUE
27481659	Ccdc66	chr14	-	27481072	27508460	2.74817e+07	64.5392	0.374473	27481473	27481860	387	Ccdc66:chr14:27481473-27481860:-	Ccdc66:1	27481359	27481659	286	1	27481359	27481959	140	191	NA	NA	NA	NA	NA	NA	NA	144	179	34	NA	FALSE	TRUE	FALSE	NA	NA	NA	NA	NA	NA	NA	TRUE	TRUE	FALSE	TRUE	NA	TRUE
32382691	Ccdc71l	chr12	+	32378704	32383904	3.23826e+07	94.3919	0.110738	32382338	32382904	566	Ccdc71l:chr12:32382338-32382904:+	Ccdc71l:1	32382691	32382991	72222250	3	32382391	32382991	27	NA	97	NA	NA	NA	NA	45	NA	234	NA	NA	NA	FALSE	FALSE	NA	TRUE	NA	NA	NA	NA	FALSE	NA	FALSE	NA	NA	TRUE	NA	TRUE
120324843	Ccdc77	chr6	-	120324322	120357429	1.20325e+08	52.6705	0.235476	120324680	120324996	316	Ccdc77:chr6:120324680-120324996:-	Ccdc77:1	120324543	120324843		NA	120324543	120325143	NA	NA	NA	NA	NA	NA	NA	151	NA	NA	160183	164168	NA	FALSE	NA	NA	NA	NA	NA	NA	NA	TRUE	NA	NA	TRUE	TRUE	TRUE	NA	TRUE
29505510	Ccdc88a	chr11	+	29373658	29511521	2.95057e+07	90.0818	0.375566	29505414	29505955	541	Ccdc88a:chr11:29505414-29505955:+	Ccdc88a:36	29505510	29505810	47	1	29505210	29505810	6,97,166	193	NA	214	263	NA	138	220	NA	29	NA	NA	NA	FALSE	TRUE	FALSE	NA	FALSE	FALSE	NA	TRUE	FALSE	NA	FALSE	NA	NA	TRUE	NA	TRUE
29505734	Ccdc88a	chr11	+	29373658	29511521	2.95057e+07	41.9541	0.253946	29505608	29505860	252	Ccdc88a:chr11:29505608-29505860:+	Ccdc88a:36	29505734	29506034		NA	29505434	29506034	NA	NA	NA	292	39	NA	NA	NA	NA	NA	170	164175	NA	FALSE	NA	NA	NA	FALSE	FALSE	NA	NA	NA	NA	NA	TRUE	TRUE	TRUE	NA	TRUE
100969634	Ccdc88c	chr12	-	100909741	101029056	1.0097e+08	107.614	0.111818	100969323	100969968	645	Ccdc88c:chr12:100969323-100969968:-	Ccdc88c:7	100969334	100969634	290	1	100969334	100969934	NA	NA	NA	NA	NA	90	NA	NA	281	265271	NA	NA	NA	FALSE	NA	NA	NA	NA	NA	TRUE	NA	NA	FALSE	FALSE	NA	NA	TRUE	NA	TRUE
42754866	Ccl19	chr4	-	42754525	42756543	42754866	37.4016	0.422436	42754753	42754978	225	Ccl19:chr4:42754753-42754978:-	Ccl19:1	42754566	42754866		NA	42754566	42755166	NA	NA	NA	NA	NA	137	NA	NA	NA	NA	NA	99	NA	FALSE	NA	NA	NA	NA	NA	TRUE	NA	NA	NA	NA	NA	TRUE	TRUE	NA	TRUE
4359633	Ccl25	chr8	+	4349588	4366204	4.35973e+06	93.615	0.247543	4359446	4360008	562	Ccl25:chr8:4359446-4360008:+	Ccl25:2	4359633	4359933	21,69	2	4359333	4359933	NA	NA	NA	NA	196	137	NA	NA	NA	NA	220	NA	NA	FALSE	NA	NA	NA	NA	FALSE	TRUE	NA	NA	NA	NA	FALSE	NA	TRUE	NA	TRUE
21747549	Ccnc	chr4	+	21727701	21759922	21747549	47.1865	0.0328286	21747407	21747690	283	Ccnc:chr4:21747407-21747690:+	Ccnc:10	21747549	21747849	27	1	21747249	21747849	NA	99	NA	NA	NA	NA	NA	NA	NA	76	263	NA	NA	FALSE	NA	TRUE	NA	NA	NA	NA	NA	NA	NA	FALSE	FALSE	NA	TRUE	NA	TRUE
85211902	Ccnh	chr13	+	85189408	85213731	8.52119e+07	21.0307	1	85211824	85211950	126	Ccnh:chr13:85211824-85211950:+	Ccnh:3	85211902	85212202		NA	85211602	85212202	127275	NA	NA	NA	237	266	NA	NA	NA	NA	279	NA	NA	FALSE	TRUE	NA	NA	NA	FALSE	FALSE	NA	NA	NA	NA	FALSE	NA	TRUE	NA	TRUE
43587543	Ccnjl	chr11	+	43528784	43587663	4.35875e+07	49.7406	1	43587385	43587663	278	Ccnjl:chr11:43587385-43587663:+	Ccnjl:12	43587543	43587663	109	1	43587243	43587843	NA	NA	NA	NA	NA	NA	NA	NA	NA	92	NA	NA	NA	FALSE	NA	NA	NA	NA	NA	NA	NA	NA	NA	TRUE	NA	NA	TRUE	NA	TRUE
98539399	Ccnt1	chr15	-	98538676	98570923	9.85394e+07	145.565	0.124115	98538920	98539794	874	Ccnt1:chr15:98538920-98539794:-	Ccnt1:1	98539099	98539399	277	1	98539099	98539699	NA	NA	NA	NA	NA	NA	NA	128	NA	NA	NA	292	NA	FALSE	NA	NA	NA	NA	NA	NA	NA	TRUE	NA	NA	NA	FALSE	TRUE	NA	TRUE
98542996	Ccnt1	chr15	-	98538676	98570923	98542996	68.2185	0.0121073	98542791	98543200	409	Ccnt1:chr15:98542791-98543200:-	Ccnt1:2	98542696	98542996	245	1	98542696	98543296	195221233	NA	NA	NA	NA	NA	123	NA	NA	NA	237	NA	NA	FALSE	FALSE	NA	NA	NA	NA	NA	TRUE	NA	NA	NA	FALSE	NA	TRUE	NA	TRUE
9314237	Ccny	chr18	-	9312279	9450150	9.3142e+06	85.2905	0.466233	9313940	9314452	512	Ccny:chr18:9313940-9314452:-	Ccny:2	9313937	9314237	204	1	9313937	9314537	NA	NA	186212	NA	NA	NA	NA	130	NA	175	NA	NA	NA	FALSE	NA	NA	FALSE	NA	NA	NA	NA	TRUE	NA	TRUE	NA	NA	TRUE	NA	TRUE
123963080	Ccr1	chr9	-	123959207	123968692	1.23963e+08	74.2637	0.355919	123962831	123963276	445	Ccr1:chr9:123962831-123963276:-	Ccr1:1	123962780	123963080	281241209108	4	123962780	123963380	128	60220	163	NA	7,88,213	NA	104	NA	218	252	NA	99275	NA	FALSE	TRUE	FALSE	TRUE	NA	FALSE	NA	TRUE	NA	FALSE	FALSE	NA	TRUE	TRUE	NA	TRUE
123963205	Ccr1	chr9	-	123959207	123968692	1.23963e+08	54.5232	0.263582	123963029	123963356	327	Ccr1:chr9:123963029-123963356:-	Ccr1:1	123962905	123963205	233,46,15	3	123962905	123963505	69253	185	288	NA	132213	NA	229	NA	NA	11	NA	75224	NA	FALSE	FALSE	FALSE	FALSE	NA	TRUE	NA	FALSE	NA	NA	FALSE	NA	FALSE	TRUE	NA	TRUE
5070279	Cd248	chr19	+	5068078	5070893	5.07036e+06	93.3904	0.158751	5070075	5070636	561	Cd248:chr19:5070075-5070636:+	Cd248:1	5070279	5070579	279	1	5069979	5070579	NA	NA	NA	NA	NA	NA	NA	NA	NA	NA	175	NA	NA	FALSE	NA	NA	NA	NA	NA	NA	NA	NA	NA	NA	TRUE	NA	TRUE	NA	TRUE
5070336	Cd248	chr19	+	5068078	5070893	5.07049e+06	56.8071	0.814817	5070316	5070657	341	Cd248:chr19:5070316-5070657:+	Cd248:1	5070336	5070636	222	1	5070036	5070636	NA	NA	NA	NA	NA	NA	NA	NA	NA	278	118	NA	NA	FALSE	NA	NA	NA	NA	NA	NA	NA	NA	NA	FALSE	TRUE	NA	TRUE	NA	TRUE
42795121	Cd2ap	chr17	-	42792946	42876389	4.27953e+07	76.413	0.14013	42795030	42795488	458	Cd2ap:chr17:42795030-42795488:-	Cd2ap:2	42794821	42795121	248213	2	42794821	42795421	51,72	NA	NA	20	214	243	NA	134	NA	NA	NA	NA	NA	FALSE	FALSE	NA	NA	FALSE	FALSE	FALSE	NA	TRUE	NA	NA	NA	NA	TRUE	NA	TRUE
104114656	Cd59a	chr2	+	104095801	104118676	104114656	144.561	0.0756548	104114222	104115089	867	Cd59a:chr2:104114222-104115089:+	Cd59a:3	104114656	104114956	25294	2	104114356	104114956	NA	NA	NA	NA	NA	NA	NA	139178	NA	NA	NA	18	NA	FALSE	NA	NA	NA	NA	NA	NA	NA	TRUE	NA	NA	NA	FALSE	TRUE	NA	TRUE
104115084	Cd59a	chr2	+	104095801	104118676	104115084	15.7045	0.0115525	104115036	104115131	95	Cd59a:chr2:104115036-104115131:+	Cd59a:3	104115084	104115384	98227264	3	104114784	104115384	NA	NA	NA	NA	247	NA	NA	NA	NA	65,69	80112	94105	NA	FALSE	NA	NA	NA	NA	FALSE	NA	NA	NA	NA	FALSE	TRUE	TRUE	TRUE	NA	TRUE
104085010	Cd59b	chr2	+	104069849	104091187	1.04085e+08	179.273	0.248932	104084594	104085670	1076	Cd59b:chr2:104084594-104085670:+	Cd59b:1	104085010	104085310		NA	104084710	104085310	NA	NA	NA	NA	NA	NA	NA	234273	NA	NA	NA	125	NA	FALSE	NA	NA	NA	NA	NA	NA	NA	FALSE	NA	NA	NA	TRUE	TRUE	NA	TRUE
104085235	Cd59b	chr2	+	104069849	104091187	1.04085e+08	32.3292	0.751068	104085138	104085332	194	Cd59b:chr2:104085138-104085332:+	Cd59b:1	104085235	104085535	222	1	104084935	104085535	NA	NA	NA	136	212	194	NA	9,48	NA	NA	221	NA	215216	FALSE	NA	NA	NA	TRUE	FALSE	FALSE	NA	FALSE	NA	NA	FALSE	NA	TRUE	FALSE	TRUE
36606546	Cd86	chr16	-	36603869	36666077	36606546	12.8535	0.347588	36606507	36606584	77	Cd86:chr16:36606507-36606584:-	Cd86:2	36606246	36606546	15	1	36606246	36606846	NA	NA	113	168	NA	NA	295	NA	NA	233	NA	NA	NA	FALSE	NA	NA	TRUE	TRUE	NA	NA	FALSE	NA	NA	FALSE	NA	NA	TRUE	NA	TRUE
148437700	Cd93	chr2	-	148425927	148443563	1.48438e+08	39.6992	1	148437579	148437818	239	Cd93:chr2:148437579-148437818:-	Cd93:2	148437400	148437700	76	1	148437400	148438000	NA	NA	NA	106	NA	NA	125	NA	208	NA	NA	NA	NA	FALSE	NA	NA	NA	TRUE	NA	NA	TRUE	NA	FALSE	NA	NA	NA	TRUE	NA	TRUE
71420404	Cd99l2	chrX	-	71418393	71492645	7.14203e+07	104.871	0.0686323	71420031	71420660	629	Cd99l2:chrX:71420031-71420660:-	Cd99l2:1	71420104	71420404		NA	71420104	71420704	116	NA	NA	NA	NA	NA	NA	53	NA	NA	NA	NA	NA	FALSE	TRUE	NA	NA	NA	NA	NA	NA	FALSE	NA	NA	NA	NA	TRUE	NA	TRUE
59564294	Cdadc1	chr14	-	59559368	59597959	5.95643e+07	91.6405	0.0826616	59564040	59564589	549	Cdadc1:chr14:59564040-59564589:-	Cdadc1:2	59563994	59564294	101	1	59563994	59564594	NA	132	NA	NA	NA	NA	NA	NA	NA	80	NA	NA	NA	FALSE	NA	TRUE	NA	NA	NA	NA	NA	NA	NA	FALSE	NA	NA	TRUE	NA	TRUE
19013957	Cdh10	chr15	+	18818947	19016304	1.9014e+07	83.046	0.462568	19013742	19014241	499	Cdh10:chr15:19013742-19014241:+	Cdh10:27	19013957	19014257	278	1	19013657	19014257	120248	NA	NA	NA	NA	NA	NA	61	NA	259	81124	NA	251252	FALSE	TRUE	NA	NA	NA	NA	NA	NA	FALSE	NA	FALSE	TRUE	NA	TRUE	FALSE	TRUE
4768153	Cdip1	chr16	-	4765455	4789990	4.76816e+06	39.9232	0.0350111	4768040	4768279	239	Cdip1:chr16:4768040-4768279:-	Cdip1:2	4767853	4768153	298,277,259,76	4	4767853	4768453	258	NA	NA	NA	NA	NA	NA	57	NA	NA	160164	NA	NA	FALSE	FALSE	NA	NA	NA	NA	NA	NA	FALSE	NA	NA	TRUE	NA	TRUE	NA	TRUE
80478305	Cdk5r1	chr11	+	80477023	80481184	8.04783e+07	68.053	1	80478103	80478511	408	Cdk5r1:chr11:80478103-80478511:+	Cdk5r1:1	80478305	80478605	206	1	80478005	80478605	170	NA	NA	NA	NA	NA	183	NA	NA	NA	NA	NA	NA	FALSE	TRUE	NA	NA	NA	NA	NA	FALSE	NA	NA	NA	NA	NA	TRUE	NA	TRUE
154361913	Cdk5rap1	chr2	-	154335377	154373010	1.54362e+08	46.8078	1	154361775	154362056	281	Cdk5rap1:chr2:154361775-154362056:-	Cdk5rap1:6	154361613	154361913		NA	154361613	154362213	NA	NA	NA	NA	NA	NA	NA	NA	NA	143	NA	168172176	NA	FALSE	NA	NA	NA	NA	NA	NA	NA	NA	NA	TRUE	NA	TRUE	TRUE	NA	TRUE
3529645	Cdk6	chr5	+	3343893	3531028	3.52968e+06	61.3515	0.239143	3529497	3529865	368	Cdk6:chr5:3529497-3529865:+	Cdk6:9	3529645	3529945	278298	2	3529345	3529945	233	NA	NA	NA	NA	NA	NA	172	NA	NA	NA	NA	284285286287288	FALSE	FALSE	NA	NA	NA	NA	NA	NA	TRUE	NA	NA	NA	NA	TRUE	FALSE	TRUE
69746464	Cdkl1	chr12	-	69743998	69790707	6.97464e+07	28.3987	0.369735	69746350	69746520	170	Cdkl1:chr12:69746350-69746520:-	Cdkl1:1	69746164	69746464		NA	69746164	69746764	NA	NA	NA	NA	105	NA	NA	NA	NA	NA	NA	NA	NA	FALSE	NA	NA	NA	NA	TRUE	NA	NA	NA	NA	NA	NA	NA	TRUE	NA	TRUE
69747400	Cdkl1	chr12	-	69743998	69790707	6.97474e+07	78.0274	0.150596	69747158	69747627	469	Cdkl1:chr12:69747158-69747627:-	Cdkl1:1	69747100	69747400		NA	69747100	69747700	NA	NA	NA	NA	NA	NA	NA	NA	NA	NA	137	NA	NA	FALSE	NA	NA	NA	NA	NA	NA	NA	NA	NA	NA	TRUE	NA	TRUE	NA	TRUE
52033533	Cdkl3	chr11	+	52004221	52084671	5.20336e+07	22.9532	0.547635	52033490	52033627	137	Cdkl3:chr11:52033490-52033627:+	Cdkl3:8	52033533	52033833	21,78,269	3	52033233	52033833	130157182	NA	NA	NA	164	NA	NA	NA	NA	NA	14,66	NA	NA	FALSE	TRUE	NA	NA	NA	TRUE	NA	NA	NA	NA	NA	FALSE	NA	TRUE	NA	TRUE
160801634	Cdkl5	chrX	-	160784222	160994704	1.60802e+08	126.486	0.363945	160801378	160802137	759	Cdkl5:chrX:160801378-160802137:-	Cdkl5:1	160801334	160801634	241,7	2	160801334	160801934	159	223	NA	NA	NA	NA	NA	NA	NA	NA	NA	183	NA	FALSE	TRUE	FALSE	NA	NA	NA	NA	NA	NA	NA	NA	NA	FALSE	TRUE	NA	TRUE
134922539	Cdkn1b	chr6	+	134920401	134925531	134922539	27.5729	0.0111769	134922456	134922621	165	Cdkn1b:chr6:134922456-134922621:+	Cdkn1b:1	134922539	134922839	48	1	134922239	134922839	252	NA	NA	NA	NA	NA	NA	NA	NA	NA	NA	111	NA	FALSE	FALSE	NA	NA	NA	NA	NA	NA	NA	NA	NA	NA	TRUE	TRUE	NA	TRUE
134924251	Cdkn1b	chr6	+	134920401	134925531	1.34924e+08	12.9105	0.0233682	134924221	134924298	77	Cdkn1b:chr6:134924221-134924298:+	Cdkn1b:2	134924251	134924551	85,85	2	134923951	134924551	64	NA	NA	265	NA	NA	134	NA	NA	NA	NA	NA	NA	FALSE	FALSE	NA	NA	FALSE	NA	NA	TRUE	NA	NA	NA	NA	NA	TRUE	NA	TRUE
134924879	Cdkn1b	chr6	+	134920401	134925531	1.34925e+08	63.9143	0.0453073	134924704	134925088	384	Cdkn1b:chr6:134924704-134925088:+	Cdkn1b:2	134924879	134925179	253253	2	134924579	134925179	NA	NA	NA	NA	NA	NA	NA	171	NA	NA	86	NA	NA	FALSE	NA	NA	NA	NA	NA	NA	NA	TRUE	NA	NA	FALSE	NA	TRUE	NA	TRUE
15889358	Cebpd	chr16	+	15887286	15891031	1.58894e+07	67.4044	1	15889148	15889552	404	Cebpd:chr16:15889148-15889552:+	Cebpd:2	15889358	15889658		NA	15889058	15889658	9122160219	NA	NA	NA	NA	NA	213	55	NA	NA	87195199204	20	NA	FALSE	TRUE	NA	NA	NA	NA	NA	FALSE	FALSE	NA	NA	FALSE	FALSE	TRUE	NA	TRUE
78919242	Cebpz	chr17	-	78919003	78937066	7.89195e+07	37.0061	0.0358559	78919358	78919580	222	Cebpz:chr17:78919358-78919580:-	Cebpz:1	78919003	78919242	236,211,50	3	78918942	78919542	NA	NA	NA	NA	193220	NA	NA	150	NA	NA	130	50	NA	FALSE	NA	NA	NA	NA	FALSE	NA	NA	TRUE	NA	NA	TRUE	FALSE	TRUE	NA	TRUE
120767533	Cecr2	chr6	+	120666421	120771204	1.20768e+08	75.4971	0.317277	120767312	120767765	453	Cecr2:chr6:120767312-120767765:+	Cecr2:23	120767533	120767833	271	1	120767233	120767833	39217	NA	NA	NA	111	NA	NA	NA	NA	243	NA	NA	NA	FALSE	FALSE	NA	NA	NA	TRUE	NA	NA	NA	NA	FALSE	NA	NA	TRUE	NA	TRUE
59605078	Celf6	chr9	+	59578192	59607292	59605078	69.8511	0.34484	59604868	59605287	419	Celf6:chr9:59604868-59605287:+	Celf6:3	59605078	59605378	34	1	59604778	59605378	NA	NA	NA	NA	NA	NA	NA	NA	NA	130	134	NA	NA	FALSE	NA	NA	NA	NA	NA	NA	NA	NA	NA	TRUE	TRUE	NA	TRUE	NA	TRUE
108392196	Celsr2	chr3	-	108390844	108415552	108392196	65.2574	0.109936	108392000	108392391	391	Celsr2:chr3:108392000-108392391:-	Celsr2:2	108391896	108392196		NA	108391896	108392496	NA	NA	NA	NA	NA	NA	NA	NA	NA	NA	NA	142146150159	NA	FALSE	NA	NA	NA	NA	NA	NA	NA	NA	NA	NA	NA	TRUE	TRUE	NA	TRUE
21857142	Cemip2	chr19	+	21778358	21860826	21857142	60.3616	0.0382372	21856960	21857323	363	Cemip2:chr19:21856960-21857323:+	Cemip2:14	21857142	21857442	36252	2	21856842	21857442	NA	NA	NA	NA	NA	NA	NA	NA	NA	NA	28164	1.68173e+17	NA	FALSE	NA	NA	NA	NA	NA	NA	NA	NA	NA	NA	TRUE	TRUE	TRUE	NA	TRUE
161083327	Cenpl	chr1	+	161070713	161086724	161083327	62.3286	0.374489	161083140	161083513	373	Cenpl:chr1:161083140-161083513:+	Cenpl:1	161083327	161083627		NA	161083027	161083627	130	NA	NA	NA	NA	NA	NA	NA	NA	118	NA	NA	NA	FALSE	TRUE	NA	NA	NA	NA	NA	NA	NA	NA	TRUE	NA	NA	TRUE	NA	TRUE
105844839	Cenpt	chr8	-	105844670	105852054	105844839	60.7983	0.962565	105844670	105845021	351	Cenpt:chr8:105844670-105845021:-	Cenpt:1	105844670	105844839	74,23	2	105844539	105845139	NA	NA	NA	NA	147	NA	NA	NA	NA	NA	56	NA	NA	FALSE	NA	NA	NA	NA	TRUE	NA	NA	NA	NA	NA	FALSE	NA	TRUE	NA	TRUE
46579493	Cenpu	chr8	+	46552028	46581158	4.65794e+07	86.8306	0.734916	46579189	46579710	521	Cenpu:chr8:46579189-46579710:+	Cenpu:7	46579493	46579793	219	1	46579193	46579793	NA	196	NA	NA	NA	NA	NA	NA	NA	200	97278	NA	93,94,95,96,97	FALSE	NA	FALSE	NA	NA	NA	NA	NA	NA	NA	FALSE	TRUE	NA	TRUE	FALSE	TRUE
76646596	Cep135	chr5	+	76588701	76647203	7.66466e+07	60.943	0.783211	76646390	76646756	366	Cep135:chr5:76646390-76646756:+	Cep135:5	76646596	76646896	61	1	76646296	76646896	51,92,131	72	NA	NA	NA	NA	NA	NA	NA	NA	NA	NA	NA	FALSE	TRUE	FALSE	NA	NA	NA	NA	NA	NA	NA	NA	NA	NA	TRUE	NA	TRUE
176780269	Cep170	chr1	-	176726939	176814067	1.7678e+08	146.36	1	176779750	176780628	878	Cep170:chr1:176779750-176780628:-	Cep170:11	176779969	176780269		NA	176779969	176780569	NA	296	NA	162	283	NA	170	91	NA	288	NA	69	NA	FALSE	NA	FALSE	NA	TRUE	FALSE	NA	TRUE	TRUE	NA	FALSE	NA	FALSE	TRUE	NA	TRUE
8195278	Cep43	chr17	+	8165501	8196804	8.19528e+06	102.376	0.439729	8194972	8195586	614	Cep43:chr17:8194972-8195586:+	Cep43:8	8195278	8195578	210	1	8194978	8195578	81179	NA	NA	NA	NA	NA	NA	NA	NA	185	NA	NA	NA	FALSE	TRUE	NA	NA	NA	NA	NA	NA	NA	NA	FALSE	NA	NA	TRUE	NA	TRUE
38074034	Cep55	chr19	+	38055037	38074736	3.80742e+07	151.242	0.224891	38073748	38074655	907	Cep55:chr19:38073748-38074655:+	Cep55:5	38074034	38074334	289	1	38073734	38074334	NA	NA	NA	NA	NA	NA	NA	124	NA	NA	NA	128	NA	FALSE	NA	NA	NA	NA	NA	NA	NA	TRUE	NA	NA	NA	TRUE	TRUE	NA	TRUE
20226985	Cep68	chr11	-	20225423	20249429	2.0227e+07	51.9533	0.0900979	20226886	20227198	312	Cep68:chr11:20226886-20227198:-	Cep68:1	20226685	20226985	296,56	2	20226685	20227285	NA	NA	NA	NA	181	140	NA	NA	NA	40275	NA	NA	NA	FALSE	NA	NA	NA	NA	FALSE	TRUE	NA	NA	NA	FALSE	NA	NA	TRUE	NA	TRUE
20230453	Cep68	chr11	-	20225423	20249429	2.02305e+07	56.0565	1	20230309	20230645	336	Cep68:chr11:20230309-20230645:-	Cep68:3	20230153	20230453	29	1	20230153	20230753	NA	NA	NA	NA	NA	101	NA	NA	NA	NA	NA	148	NA	FALSE	NA	NA	NA	NA	NA	TRUE	NA	NA	NA	NA	NA	TRUE	TRUE	NA	TRUE
20239228	Cep68	chr11	-	20225423	20249429	2.02392e+07	40.0855	1	20239117	20239357	240	Cep68:chr11:20239117-20239357:-	Cep68:6	20238928	20239228		NA	20238928	20239528	NA	NA	NA	NA	NA	NA	NA	NA	NA	NA	158	NA	NA	FALSE	NA	NA	NA	NA	NA	NA	NA	NA	NA	NA	TRUE	NA	TRUE	NA	TRUE
94789857	Cep83	chr10	+	94688654	94790856	9.47899e+07	59.4926	0.042398	94789681	94790038	357	Cep83:chr10:94789681-94790038:+	Cep83:14	94789857	94790157		NA	94789557	94790157	NA	NA	NA	NA	NA	NA	NA	114	251	169	55109	NA	NA	FALSE	NA	NA	NA	NA	NA	NA	NA	TRUE	FALSE	TRUE	TRUE	NA	TRUE	NA	TRUE
55924766	Cep97	chr16	-	55899886	55934855	5.59252e+07	14.4307	0.00343727	55925155	55925241	86	Cep97:chr16:55925155-55925241:-	Cep97:10	55924466	55924766	206206206	3	55924466	55925066	NA	186	NA	177	NA	NA	NA	NA	182	193	NA	61	NA	FALSE	NA	FALSE	NA	TRUE	NA	NA	NA	NA	FALSE	FALSE	NA	FALSE	TRUE	NA	TRUE
4525241	Cers4	chr8	+	4493199	4531700	4.52519e+06	59.6543	0.0201085	4525009	4525367	358	Cers4:chr8:4525009-4525367:+	Cers4:4	4525241	4525541	234282	2	4524941	4525541	NA	NA	NA	NA	NA	NA	NA	NA	265	206	NA	141	NA	FALSE	NA	NA	NA	NA	NA	NA	NA	NA	FALSE	FALSE	NA	TRUE	TRUE	NA	TRUE
69109292	Cers6	chr2	+	68861441	69114283	6.91094e+07	109.227	0.383861	69109042	69109697	655	Cers6:chr2:69109042-69109697:+	Cers6:31	69109292	69109592		NA	69108992	69109592	NA	180	NA	NA	NA	NA	NA	NA	NA	NA	219	NA	NA	FALSE	NA	TRUE	NA	NA	NA	NA	NA	NA	NA	NA	FALSE	NA	TRUE	NA	TRUE
96635874	Cert1	chr13	+	96542735	96640167	9.66358e+07	32.7811	0.599183	96635727	96635924	197	Cert1:chr13:96635727-96635924:+	Cert1:14	96635874	96636174	12	1	96635574	96636174	NA	26	NA	NA	NA	60	NA	NA	NA	NA	176	NA	NA	FALSE	NA	FALSE	NA	NA	NA	FALSE	NA	NA	NA	NA	TRUE	NA	TRUE	NA	TRUE
8021154	Cfap300	chr9	-	8020455	8042823	8.02114e+06	64.6529	0.0403644	8020950	8021338	388	Cfap300:chr9:8020950-8021338:-	Cfap300:1	8020854	8021154		NA	8020854	8021454	NA	80	NA	73	NA	NA	NA	NA	92103	165	53	170180185	NA	FALSE	NA	FALSE	NA	FALSE	NA	NA	NA	NA	TRUE	TRUE	FALSE	TRUE	TRUE	NA	TRUE
46195226	Cfap97	chr8	+	46163651	46195590	4.61953e+07	111.293	0.293154	46194946	46195590	644	Cfap97:chr8:46194946-46195590:+	Cfap97:5	46195226	46195526	268268	2	46194926	46195526	267280	NA	NA	NA	NA	103	NA	NA	NA	246	259	NA	NA	FALSE	FALSE	NA	NA	NA	NA	TRUE	NA	NA	NA	FALSE	FALSE	NA	TRUE	NA	TRUE
58733014	Cflar	chr1	+	58711560	58759109	5.8733e+07	65.9656	1	58732823	58733218	395	Cflar:chr1:58732823-58733218:+	Cflar:4	58733014	58733314	213	1	58732714	58733314	233	151	NA	NA	NA	NA	119	NA	NA	195	NA	NA	NA	FALSE	FALSE	TRUE	NA	NA	NA	NA	TRUE	NA	NA	FALSE	NA	NA	TRUE	NA	TRUE
64857256	Cggbp1	chr16	+	64851996	64860662	6.48573e+07	44.7941	0.14855	64857167	64857436	269	Cggbp1:chr16:64857167-64857436:+	Cggbp1:4	64857256	64857556	64203	2	64856956	64857556	7	NA	NA	NA	49167	NA	NA	NA	NA	NA	NA	171	NA	FALSE	FALSE	NA	NA	NA	TRUE	NA	NA	NA	NA	NA	NA	TRUE	TRUE	NA	TRUE
13881266	Champ1	chr8	+	13869641	13882861	1.38813e+07	118.292	0.134031	13880962	13881672	710	Champ1:chr8:13880962-13881672:+	Champ1:3	13881266	13881566		NA	13880966	13881566	NA	NA	NA	NA	NA	103	NA	NA	NA	114	NA	NA	NA	FALSE	NA	NA	NA	NA	NA	TRUE	NA	NA	NA	TRUE	NA	NA	TRUE	NA	TRUE
110136483	Chfr	chr5	+	110135842	110175469	1.10137e+08	36.4178	0.268144	110136401	110136619	218	Chfr:chr5:110136401-110136619:+	Chfr:1	110136483	110136783	80	1	110136183	110136783	NA	NA	NA	NA	NA	NA	NA	124	70	219	NA	148264	NA	FALSE	NA	NA	NA	NA	NA	NA	NA	TRUE	FALSE	FALSE	NA	TRUE	TRUE	NA	TRUE
103389816	Chic1	chrX	+	103356476	103396118	1.0339e+08	52.6488	0.147373	103389733	103390049	316	Chic1:chrX:103389733-103390049:+	Chic1:8	103389816	103390116	226284	2	103389516	103390116	217	NA	208	NA	NA	NA	NA	NA	NA	NA	143	NA	NA	FALSE	FALSE	NA	FALSE	NA	NA	NA	NA	NA	NA	NA	TRUE	NA	TRUE	NA	TRUE
103730354	Chl1	chr6	+	103510586	103750211	1.0373e+08	44.7469	0.154343	103730063	103730332	269	Chl1:chr6:103730063-103730332:+	Chl1:36	103730354	103730654		NA	103730054	103730654	NA	NA	NA	NA	NA	NA	NA	NA	37	164	251	NA	NA	FALSE	NA	NA	NA	NA	NA	NA	NA	NA	FALSE	TRUE	FALSE	NA	TRUE	NA	TRUE
103730437	Chl1	chr6	+	103510586	103750211	1.0373e+08	65.9817	0.845657	103730233	103730629	396	Chl1:chr6:103730233-103730629:+	Chl1:36	103730437	103730737		NA	103730137	103730737	NA	NA	NA	NA	NA	NA	NA	NA	NA	81	168	NA	NA	FALSE	NA	NA	NA	NA	NA	NA	NA	NA	NA	FALSE	TRUE	NA	TRUE	NA	TRUE
65539508	Chmp2b	chr16	-	65538584	65562520	6.55395e+07	131.287	0.127381	65539087	65539875	788	Chmp2b:chr16:65539087-65539875:-	Chmp2b:1	65539208	65539508	265	1	65539208	65539808	29,71	80	NA	NA	249	NA	34	149	240	NA	113	NA	NA	FALSE	FALSE	FALSE	NA	NA	FALSE	NA	FALSE	TRUE	FALSE	NA	TRUE	NA	TRUE	NA	TRUE
78951315	Chodl	chr16	+	78930948	78951733	7.89513e+07	71.2896	0.332345	78951071	78951499	428	Chodl:chr16:78951071-78951499:+	Chodl:1	78951315	78951615		NA	78951015	78951615	NA	113	NA	NA	171	NA	NA	NA	109	NA	188	194	NA	FALSE	NA	TRUE	NA	NA	TRUE	NA	NA	NA	TRUE	NA	FALSE	FALSE	TRUE	NA	TRUE
18302072	Chordc1	chr9	+	18292125	18317447	1.83021e+07	47.5075	1	18301947	18302232	285	Chordc1:chr9:18301947-18302232:+	Chordc1:6	18302072	18302372	210	1	18301772	18302372	NA	191	NA	NA	44	NA	NA	NA	NA	98	NA	NA	NA	FALSE	NA	FALSE	NA	NA	FALSE	NA	NA	NA	NA	TRUE	NA	NA	TRUE	NA	TRUE
18314644	Chordc1	chr9	+	18292125	18317447	1.83146e+07	60.2947	1	18314453	18314814	361	Chordc1:chr9:18314453-18314814:+	Chordc1:12	18314644	18314944		NA	18314344	18314944	NA	NA	NA	NA	NA	NA	NA	9	NA	NA	176182	NA	NA	FALSE	NA	NA	NA	NA	NA	NA	NA	FALSE	NA	NA	TRUE	NA	TRUE	NA	TRUE
38864291	Chst10	chr1	-	38863867	38898089	3.88642e+07	129.218	0.123908	38863867	38864629	762	Chst10:chr1:38863867-38864629:-	Chst10:1	38863991	38864291		NA	38863991	38864591	99	NA	223	NA	NA	87	NA	NA	NA	NA	NA	NA	NA	FALSE	TRUE	NA	FALSE	NA	NA	FALSE	NA	NA	NA	NA	NA	NA	TRUE	NA	TRUE
60181682	Chst3	chr10	-	60181528	60219260	6.01817e+07	63.0517	1	60181528	60181889	361	Chst3:chr10:60181528-60181889:-	Chst3:1	60181528	60181682		NA	60181382	60181982	124	NA	NA	106	NA	NA	NA	140	NA	111115128132136	NA	NA	NA	FALSE	TRUE	NA	NA	TRUE	NA	NA	NA	TRUE	NA	TRUE	NA	NA	TRUE	NA	TRUE
78125442	Cilk1	chr9	+	78113284	78172126	7.81255e+07	87.6595	1	78125190	78125716	526	Cilk1:chr9:78125190-78125716:+	Cilk1:2	78125442	78125742	214	1	78125142	78125742	NA	NA	NA	NA	NA	NA	NA	NA	NA	1.73177e+17	NA	NA	215216217	FALSE	NA	NA	NA	NA	NA	NA	NA	NA	NA	TRUE	NA	NA	TRUE	FALSE	TRUE
110876854	Cinp	chr12	-	110869566	110889145	1.10877e+08	29.8863	1	110876784	110876964	180	Cinp:chr12:110876784-110876964:-	Cinp:3	110876554	110876854		NA	110876554	110877154	102	NA	NA	NA	NA	NA	NA	NA	NA	NA	NA	NA	NA	FALSE	TRUE	NA	NA	NA	NA	NA	NA	NA	NA	NA	NA	NA	TRUE	NA	TRUE
49018974	Cip2a	chr16	+	48994185	49019709	4.9019e+07	139.559	0.193965	49018573	49019410	837	Cip2a:chr16:49018573-49019410:+	Cip2a:4	49018974	49019274	203253275	3	49018674	49019274	202	NA	NA	NA	253	52	NA	NA	146	NA	NA	NA	NA	FALSE	FALSE	NA	NA	NA	FALSE	FALSE	NA	NA	TRUE	NA	NA	NA	TRUE	NA	TRUE
73284010	Cir1	chr2	-	73280082	73312701	73284010	62.4297	0.320439	73283822	73284197	375	Cir1:chr2:73283822-73284197:-	Cir1:2	73283710	73284010		NA	73283710	73284310	160	NA	NA	NA	15	NA	NA	NA	NA	122	NA	213	NA	FALSE	TRUE	NA	NA	NA	FALSE	NA	NA	NA	NA	TRUE	NA	FALSE	TRUE	NA	TRUE
73284102	Cir1	chr2	-	73280082	73312701	73284102	70.102	0.23942	73283891	73284312	421	Cir1:chr2:73283891-73284312:-	Cir1:2	73283802	73284102		NA	73283802	73284402	58252	NA	NA	NA	107	NA	NA	NA	NA	214	NA	NA	NA	FALSE	FALSE	NA	NA	NA	TRUE	NA	NA	NA	NA	FALSE	NA	NA	TRUE	NA	TRUE
73284336	Cir1	chr2	-	73280082	73312701	73284336	99.2188	0.154196	73284038	73284633	595	Cir1:chr2:73284038-73284633:-	Cir1:2	73284036	73284336		NA	73284036	73284636	292	NA	NA	NA	134	NA	NA	NA	NA	84	NA	NA	NA	FALSE	FALSE	NA	NA	NA	TRUE	NA	NA	NA	NA	FALSE	NA	NA	TRUE	NA	TRUE
135408187	Cisd2	chr3	-	135406408	135423925	1.35408e+08	120.423	0.0565723	135407753	135408476	723	Cisd2:chr3:135407753-135408476:-	Cisd2:2	135407887	135408187	259207	2	135407887	135408487	NA	NA	NA	NA	163182	NA	NA	NA	NA	NA	NA	NA	NA	FALSE	NA	NA	NA	NA	TRUE	NA	NA	NA	NA	NA	NA	NA	TRUE	NA	TRUE
104257435	Cklf	chr8	+	104250861	104266173	1.04257e+08	14.7923	0.0454966	104257380	104257468	88	Cklf:chr8:104257380-104257468:+	Cklf:1	104257435	104257735		NA	104257135	104257735	NA	NA	NA	172	NA	NA	NA	NA	NA	286	253	NA	NA	FALSE	NA	NA	NA	TRUE	NA	NA	NA	NA	NA	FALSE	FALSE	NA	TRUE	NA	TRUE
104257530	Cklf	chr8	+	104250861	104266173	1.04258e+08	160.684	0.157744	104257129	104258093	964	Cklf:chr8:104257129-104258093:+	Cklf:1	104257530	104257830	210	1	104257230	104257830	NA	NA	NA	77	254	NA	NA	NA	NA	191	158	NA	NA	FALSE	NA	NA	NA	FALSE	FALSE	NA	NA	NA	NA	FALSE	TRUE	NA	TRUE	NA	TRUE
108676969	Clcc1	chr3	+	108653913	108678840	1.08677e+08	29.2609	1	108676861	108677036	175	Clcc1:chr3:108676861-108677036:+	Clcc1:5	108676969	108677269	9,9	2	108676669	108677269	63	140	NA	NA	221	NA	NA	NA	NA	NA	NA	NA	NA	FALSE	FALSE	TRUE	NA	NA	FALSE	NA	NA	NA	NA	NA	NA	NA	TRUE	NA	TRUE
5505457	Cldn12	chr5	-	5504965	5514789	5.50535e+06	129.433	0.176685	5504965	5505736	771	Cldn12:chr5:5504965-5505736:-	Cldn12:1	5505157	5505457	235	1	5505157	5505757	20125	NA	NA	5	NA	NA	NA	NA	NA	213	NA	NA	NA	FALSE	TRUE	NA	NA	FALSE	NA	NA	NA	NA	NA	FALSE	NA	NA	TRUE	NA	TRUE
123144630	Cldn34c1	chrX	+	123103559	123145654	1.23145e+08	69.5336	1	123144408	123144826	418	Cldn34c1:chrX:123144408-123144826:+	Cldn34c1:8	123144630	123144930		NA	123144330	123144930	202	NA	NA	NA	208	NA	NA	NA	NA	167	140171186	NA	NA	FALSE	FALSE	NA	NA	NA	FALSE	NA	NA	NA	NA	TRUE	TRUE	NA	TRUE	NA	TRUE
129428418	Clec1a	chr6	-	129423619	129452000	1.29428e+08	21.9371	0.258683	129428332	129428464	132	Clec1a:chr6:129428332-129428464:-	Clec1a:1	129428118	129428418		NA	129428118	129428718	NA	NA	NA	NA	NA	NA	NA	NA	NA	NA	133152191228	113	NA	FALSE	NA	NA	NA	NA	NA	NA	NA	NA	NA	NA	TRUE	TRUE	TRUE	NA	TRUE
123157229	Clec3b	chr9	+	123150946	123160983	1.23157e+08	78.2502	0.437187	123157001	123157470	469	Clec3b:chr9:123157001-123157470:+	Clec3b:1	123157229	123157529	201	1	123156929	123157529	NA	NA	NA	NA	NA	NA	NA	NA	NA	179	NA	NA	NA	FALSE	NA	NA	NA	NA	NA	NA	NA	NA	NA	TRUE	NA	NA	TRUE	NA	TRUE
40785007	Clmp	chr9	+	40686012	40785785	4.0785e+07	95.8415	0.743364	40784731	40785306	575	Clmp:chr9:40784731-40785306:+	Clmp:15	40785007	40785307	203	1	40784707	40785307	271	NA	NA	NA	NA	NA	NA	NA	295	229290	242	150169183187	210211212	FALSE	FALSE	NA	NA	NA	NA	NA	NA	NA	FALSE	FALSE	FALSE	TRUE	TRUE	FALSE	TRUE
9449612	Clvs1	chr4	+	9269317	9451691	9449612	80.4031	0.500939	9449370	9449853	483	Clvs1:chr4:9449370-9449853:+	Clvs1:18	9449612	9449912	292	1	9449312	9449912	45	NA	NA	NA	NA	NA	NA	NA	149	261265	99	NA	NA	FALSE	FALSE	NA	NA	NA	NA	NA	NA	NA	TRUE	FALSE	TRUE	NA	TRUE	NA	TRUE
9451053	Clvs1	chr4	+	9269317	9451691	9.45113e+06	177.788	0.112691	9450592	9451658	1066	Clvs1:chr4:9450592-9451658:+	Clvs1:19	9451053	9451353	251	1	9450753	9451353	67	NA	NA	NA	102231	NA	NA	NA	NA	NA	NA	NA	NA	FALSE	FALSE	NA	NA	NA	TRUE	NA	NA	NA	NA	NA	NA	NA	TRUE	NA	TRUE
116889524	Cmc2	chr8	-	116885295	116921455	1.1689e+08	24.5402	0.0221436	116889738	116889885	147	Cmc2:chr8:116889738-116889885:-	Cmc2:1	116889224	116889524	282,236,6,282,236,6	6	116889224	116889824	179	NA	NA	NA	NA	NA	NA	NA	NA	NA	NA	NA	2.48249e+23	FALSE	TRUE	NA	NA	NA	NA	NA	NA	NA	NA	NA	NA	NA	TRUE	FALSE	TRUE
181460757	Cnih3	chr1	+	181352630	181471023	1.81461e+08	44.2674	0.0186815	181460616	181460882	266	Cnih3:chr1:181460616-181460882:+	Cnih3:4	181460757	181461057		NA	181460457	181461057	NA	NA	NA	NA	NA	NA	NA	NA	NA	NA	153164169	81	NA	FALSE	NA	NA	NA	NA	NA	NA	NA	NA	NA	NA	TRUE	FALSE	TRUE	NA	TRUE
157821631	Cnksr2	chrX	-	157821430	158043294	1.57822e+08	81.3985	0.573334	157821430	157821873	443	Cnksr2:chrX:157821430-157821873:-	Cnksr2:1	157821430	157821631	201,40	2	157821331	157821931	NA	NA	NA	NA	41	NA	NA	49197	110	181	NA	NA	NA	FALSE	NA	NA	NA	NA	FALSE	NA	NA	FALSE	TRUE	FALSE	NA	NA	TRUE	NA	TRUE
157821697	Cnksr2	chrX	-	157821430	158043294	1.57822e+08	52.3458	0.300785	157821607	157821921	314	Cnksr2:chrX:157821607-157821921:-	Cnksr2:1	157821430	157821697	267106	2	157821397	157821997	NA	NA	NA	NA	107	NA	NA	115263	176	247	NA	NA	NA	FALSE	NA	NA	NA	NA	TRUE	NA	NA	TRUE	TRUE	FALSE	NA	NA	TRUE	NA	TRUE
39546533	Cnot11	chr1	+	39534992	39546889	3.95463e+07	57.2272	0.0946427	39546160	39546503	343	Cnot11:chr1:39546160-39546503:+	Cnot11:2	39546533	39546833		NA	39546233	39546833	NA	NA	NA	NA	NA	NA	102	NA	NA	NA	NA	NA	NA	FALSE	NA	NA	NA	NA	NA	NA	TRUE	NA	NA	NA	NA	NA	TRUE	NA	TRUE
138193719	Cnpy4	chr5	+	138187485	138193920	1.38194e+08	68.3892	0.280525	138193528	138193920	392	Cnpy4:chr5:138193528-138193920:+	Cnpy4:3	138193719	138193920	88201	2	138193419	138194019	NA	NA	NA	NA	NA	NA	NA	NA	NA	174	NA	181	NA	FALSE	NA	NA	NA	NA	NA	NA	NA	NA	NA	TRUE	NA	FALSE	TRUE	NA	TRUE
92339835	Cntn1	chr15	+	92051165	92341967	9.23399e+07	60.2719	0.430338	92339687	92340049	362	Cntn1:chr15:92339687-92340049:+	Cntn1:8	92339835	92340135	5226279	3	92339535	92340135	NA	NA	NA	259	265	NA	NA	NA	126	NA	NA	270	268	FALSE	NA	NA	NA	FALSE	FALSE	NA	NA	NA	TRUE	NA	NA	FALSE	TRUE	FALSE	TRUE
108340550	Coa7	chr4	+	108328140	108343510	1.08341e+08	53.8864	1	108340393	108340716	323	Coa7:chr4:108340393-108340716:+	Coa7:3	108340550	108340850		NA	108340250	108340850	NA	NA	NA	NA	NA	NA	NA	8	NA	NA	172188	NA	NA	FALSE	NA	NA	NA	NA	NA	NA	NA	FALSE	NA	NA	TRUE	NA	TRUE	NA	TRUE
124551581	Cog2	chr8	+	124520767	124554482	1.24552e+08	118.048	0.2853	124551374	124552083	709	Cog2:chr8:124551374-124552083:+	Cog2:6	124551581	124551881	98	1	124551281	124551881	NA	NA	NA	NA	NA	158	NA	NA	NA	NA	16	93	NA	FALSE	NA	NA	NA	NA	NA	TRUE	NA	NA	NA	NA	FALSE	TRUE	TRUE	NA	TRUE
31925690	Cog5	chr12	+	31654869	31937630	3.19257e+07	53.0098	1	31925545	31925863	318	Cog5:chr12:31925545-31925863:+	Cog5:24	31925690	31925990	101	1	31925390	31925990	174	NA	NA	233	NA	NA	115	NA	NA	NA	NA	NA	NA	FALSE	TRUE	NA	NA	FALSE	NA	NA	TRUE	NA	NA	NA	NA	NA	TRUE	NA	TRUE
114220113	Col11a1	chr3	+	114030540	114220756	1.1422e+08	172.949	0.220905	114219631	114220669	1038	Col11a1:chr3:114219631-114220669:+	Col11a1:13	114220113	114220413	7207	2	114219813	114220413	99	NA	NA	NA	NA	NA	NA	105	77	190	NA	NA	NA	FALSE	TRUE	NA	NA	NA	NA	NA	NA	TRUE	FALSE	FALSE	NA	NA	TRUE	NA	TRUE
51582321	Col23a1	chr11	+	51289920	51583925	5.15823e+07	61.0066	1	51582119	51582485	366	Col23a1:chr11:51582119-51582485:+	Col23a1:8	51582321	51582621		NA	51582021	51582621	NA	NA	153	NA	NA	NA	NA	NA	NA	NA	158164170	275	NA	FALSE	NA	NA	TRUE	NA	NA	NA	NA	NA	NA	NA	TRUE	FALSE	TRUE	NA	TRUE
45376174	Col5a2	chr1	-	45374292	45503282	4.5376e+07	107.425	0.405849	45375677	45376321	644	Col5a2:chr1:45375677-45376321:-	Col5a2:2	45375874	45376174	295266238	3	45375874	45376474	155	NA	NA	NA	NA	NA	NA	NA	NA	NA	NA	NA	NA	FALSE	TRUE	NA	NA	NA	NA	NA	NA	NA	NA	NA	NA	NA	TRUE	NA	TRUE
180621944	Col9a3	chr2	+	180597790	180622189	1.80622e+08	79.2247	0.0742015	180621670	180622145	475	Col9a3:chr2:180621670-180622145:+	Col9a3:2	180621944	180622189	7245	2	180621644	180622244	118153	NA	NA	40	75	NA	NA	216	NA	221	NA	212	NA	FALSE	TRUE	NA	NA	FALSE	FALSE	NA	NA	FALSE	NA	FALSE	NA	FALSE	TRUE	NA	TRUE
9878263	Colec12	chr18	+	9707595	9882651	9.87827e+06	35.3227	1	9878165	9878377	212	Colec12:chr18:9878165-9878377:+	Colec12:1	9878263	9878563		NA	9877963	9878563	NA	NA	NA	NA	NA	NA	NA	NA	NA	NA	70,81,85,89,115,119,123,127,131,135,139,143,147,151,155,159,163,167,171,175,179,183,187	NA	66,67,68,69,70,73,74	FALSE	NA	NA	NA	NA	NA	NA	NA	NA	NA	NA	TRUE	NA	TRUE	FALSE	TRUE
71624044	Colgalt1	chr8	+	71610998	71626814	7.1624e+07	43.1274	1	71623918	71624177	259	Colgalt1:chr8:71623918-71624177:+	Colgalt1:2	71624044	71624344	3,76,209	3	71623744	71624344	75	NA	NA	NA	NA	NA	NA	NA	171	NA	151	NA	NA	FALSE	FALSE	NA	NA	NA	NA	NA	NA	NA	TRUE	NA	TRUE	NA	TRUE	NA	TRUE
22836264	Commd1b	chr11	-	22833265	22982090	2.28363e+07	44.6162	0.647011	22836122	22836390	268	Commd1b:chr11:22836122-22836390:-	Commd1b:2	22835964	22836264		NA	22835964	22836564	260	NA	NA	NA	NA	NA	NA	NA	NA	NA	165	NA	NA	FALSE	FALSE	NA	NA	NA	NA	NA	NA	NA	NA	NA	TRUE	NA	TRUE	NA	TRUE
159344923	Cop1	chr1	+	159232326	159354872	1.59345e+08	68.5272	0.419669	159344737	159345148	411	Cop1:chr1:159344737-159345148:+	Cop1:15	159344923	159345223	33205	2	159344623	159345223	159	NA	NA	NA	NA	NA	NA	NA	NA	163172	NA	149185	NA	FALSE	TRUE	NA	NA	NA	NA	NA	NA	NA	NA	TRUE	NA	TRUE	TRUE	NA	TRUE
21913322	Coq3	chr4	+	21879673	21913960	2.19133e+07	37.2186	1	21913210	21913433	223	Coq3:chr4:21913210-21913433:+	Coq3:10	21913322	21913622		NA	21913022	21913622	NA	146	NA	NA	NA	NA	NA	NA	NA	NA	NA	NA	70	FALSE	NA	TRUE	NA	NA	NA	NA	NA	NA	NA	NA	NA	NA	TRUE	FALSE	TRUE
4626358	Coro7	chr16	-	4625183	4679777	4.62634e+06	50.198	1	4626185	4626486	301	Coro7:chr16:4626185-4626486:-	Coro7:2	4626058	4626358	225213	2	4626058	4626658	NA	NA	NA	138	NA	130	NA	NA	NA	193	NA	NA	203204	FALSE	NA	NA	NA	TRUE	NA	TRUE	NA	NA	NA	FALSE	NA	NA	TRUE	FALSE	TRUE
81472167	Cox16	chr12	-	81358853	81485120	8.1472e+07	51.7233	0.0636458	81471809	81472120	311	Cox16:chr12:81471809-81472120:-	Cox16:3	81471867	81472167	206,72,206,72,206,72	6	81471867	81472467	NA	168	NA	NA	57	NA	NA	103	NA	NA	NA	NA	NA	FALSE	NA	TRUE	NA	NA	FALSE	NA	NA	TRUE	NA	NA	NA	NA	TRUE	NA	TRUE
81474596	Cox16	chr12	-	81358853	81485120	8.14746e+07	21.4588	1	81474546	81474674	128	Cox16:chr12:81474546-81474674:-	Cox16:4	81474296	81474596	266,37	2	81474296	81474896	NA	NA	NA	247	NA	88	NA	NA	NA	NA	92	NA	NA	FALSE	NA	NA	NA	FALSE	NA	FALSE	NA	NA	NA	NA	TRUE	NA	TRUE	NA	TRUE
38349309	Cox17	chr16	+	38346991	38354160	3.83493e+07	28.2029	1	38349209	38349378	169	Cox17:chr16:38349209-38349378:+	Cox17:2	38349309	38349609	20,20,20	3	38349009	38349609	NA	213	NA	NA	NA	NA	NA	NA	115	NA	NA	NA	NA	FALSE	NA	FALSE	NA	NA	NA	NA	NA	NA	TRUE	NA	NA	NA	TRUE	NA	TRUE
35935301	Cox6c	chr15	-	35930440	35938246	3.59353e+07	31.741	1	35935227	35935418	191	Cox6c:chr15:35935227-35935418:-	Cox6c:2	35935001	35935301	16	1	35935001	35935601	NA	89	NA	NA	161	NA	NA	NA	NA	NA	47	280	NA	FALSE	NA	FALSE	NA	NA	TRUE	NA	NA	NA	NA	NA	FALSE	FALSE	TRUE	NA	TRUE
83502625	Cox7a2l	chr17	-	83501762	83514330	8.35025e+07	151.047	0.0644614	83502056	83502962	906	Cox7a2l:chr17:83502056-83502962:-	Cox7a2l:1	83502325	83502625	221	1	83502325	83502925	NA	NA	NA	NA	NA	NA	NA	NA	NA	NA	NA	15120	NA	FALSE	NA	NA	NA	NA	NA	NA	NA	NA	NA	NA	NA	TRUE	TRUE	NA	TRUE
86045755	Cox7c	chr13	-	86041117	86046460	8.60458e+07	39.3647	1	86045657	86045893	236	Cox7c:chr13:86045657-86045893:-	Cox7c:2	86045455	86045755	28	1	86045455	86046055	NA	NA	NA	NA	178284	201	NA	NA	247	186	NA	NA	NA	FALSE	NA	NA	NA	NA	TRUE	FALSE	NA	NA	FALSE	FALSE	NA	NA	TRUE	NA	TRUE
7215303	Cox8a	chr19	-	7215153	7217616	7.21531e+06	56.1406	1	7215153	7215475	322	Cox8a:chr19:7215153-7215475:-	Cox8a:1	7215153	7215303	108,68,16	3	7215003	7215603	132	NA	NA	NA	NA	NA	NA	NA	NA	121	NA	NA	NA	FALSE	TRUE	NA	NA	NA	NA	NA	NA	NA	NA	TRUE	NA	NA	TRUE	NA	TRUE
76782157	Cpd	chr11	-	76774782	76847018	7.67822e+07	54.6494	1	76781989	76782317	328	Cpd:chr11:76781989-76782317:-	Cpd:4	76781857	76782157	204,34,0	3	76781857	76782457	167	NA	NA	273	NA	NA	NA	NA	NA	NA	NA	NA	NA	FALSE	TRUE	NA	NA	FALSE	NA	NA	NA	NA	NA	NA	NA	NA	TRUE	NA	TRUE
156072051	Cpne1	chr2	-	156071827	156111939	1.56072e+08	82.5827	0.451728	156071827	156072317	490	Cpne1:chr2:156071827-156072317:-	Cpne1:1	156071827	156072051	222206222206	4	156071751	156072351	162	NA	NA	NA	NA	NA	NA	NA	169194	185	NA	NA	NA	FALSE	TRUE	NA	NA	NA	NA	NA	NA	NA	TRUE	FALSE	NA	NA	TRUE	NA	TRUE
102003270	Cpsf2	chr12	+	101975988	102006428	102003270	61.768	0.474221	102003084	102003455	371	Cpsf2:chr12:102003084-102003455:+	Cpsf2:5	102003270	102003570	20,67,203,223	4	102002970	102003570	NA	NA	NA	NA	NA	NA	NA	NA	NA	179	183187191	NA	NA	FALSE	NA	NA	NA	NA	NA	NA	NA	NA	NA	TRUE	FALSE	NA	TRUE	NA	TRUE
102004034	Cpsf2	chr12	+	101975988	102006428	102004034	130.603	4.43214e-08	102003642	102004425	783	Cpsf2:chr12:102003642-102004425:+	Cpsf2:5	102004034	102004334	247282	2	102003734	102004334	176	NA	NA	NA	229	NA	NA	NA	NA	NA	NA	NA	NA	FALSE	TRUE	NA	NA	NA	FALSE	NA	NA	NA	NA	NA	NA	NA	TRUE	NA	TRUE
117355944	Cpsf6	chr10	-	117344667	117376973	1.17356e+08	26.7638	1	117355882	117356043	161	Cpsf6:chr10:117355882-117356043:-	Cpsf6:5	117355644	117355944	9,9	2	117355644	117356244	NA	NA	NA	NA	NA	91	NA	NA	95	NA	NA	NA	NA	FALSE	NA	NA	NA	NA	NA	TRUE	NA	NA	TRUE	NA	NA	NA	TRUE	NA	TRUE
195096695	Cr1l	chr1	-	195095284	195131561	1.95097e+08	62.7736	1	195096504	195096881	377	Cr1l:chr1:195096504-195096881:-	Cr1l:2	195096395	195096695		NA	195096395	195096995	12	126	NA	NA	111	162	NA	NA	NA	NA	NA	NA	NA	FALSE	FALSE	TRUE	NA	NA	TRUE	TRUE	NA	NA	NA	NA	NA	NA	TRUE	NA	TRUE
64598007	Creb1	chr1	+	64532809	64604548	6.45981e+07	72.8657	0.355209	64597862	64598299	437	Creb1:chr1:64597862-64598299:+	Creb1:11	64598007	64598307	270	1	64597707	64598307	NA	154	NA	NA	NA	NA	NA	NA	NA	241245	NA	NA	NA	FALSE	NA	TRUE	NA	NA	NA	NA	NA	NA	NA	FALSE	NA	NA	TRUE	NA	TRUE
64602537	Creb1	chr1	+	64532809	64604548	6.46027e+07	132.692	0.152076	64602272	64603068	796	Creb1:chr1:64602272-64603068:+	Creb1:13	64602537	64602837	238	1	64602237	64602837	165	NA	NA	NA	296	NA	NA	NA	NA	208	NA	NA	NA	FALSE	TRUE	NA	NA	NA	FALSE	NA	NA	NA	NA	FALSE	NA	NA	TRUE	NA	TRUE
53695854	Creb5	chr6	+	53287270	53700376	5.36959e+07	50.2275	0.605224	53695700	53696002	302	Creb5:chr6:53695700-53696002:+	Creb5:45	53695854	53696154	286	1	53695554	53696154	53273	NA	NA	NA	NA	123	NA	162196	NA	170175	158190207	NA	NA	FALSE	FALSE	NA	NA	NA	NA	TRUE	NA	TRUE	NA	TRUE	TRUE	NA	TRUE	NA	TRUE
26765218	Crebrf	chr17	+	26715650	26776635	2.67652e+07	42.8025	0.539372	26765093	26765350	257	Crebrf:chr17:26765093-26765350:+	Crebrf:13	26765218	26765518		NA	26764918	26765518	NA	NA	NA	NA	NA	NA	NA	NA	NA	266	1.71187e+26	NA	NA	FALSE	NA	NA	NA	NA	NA	NA	NA	NA	NA	FALSE	TRUE	NA	TRUE	NA	TRUE
26776345	Crebrf	chr17	+	26715650	26776635	2.67764e+07	94.3016	0.159973	26776086	26776635	549	Crebrf:chr17:26776086-26776635:+	Crebrf:17	26776345	26776635	209244284	3	26776045	26776645	113	NA	NA	NA	NA	NA	NA	NA	NA	263	278	NA	NA	FALSE	TRUE	NA	NA	NA	NA	NA	NA	NA	NA	FALSE	FALSE	NA	TRUE	NA	TRUE
3294726	Crem	chr18	-	3253541	3337589	3.29478e+06	48.4627	0.132506	3294636	3294927	291	Crem:chr18:3294636-3294927:-	Crem:3	3294426	3294726	250,85	2	3294426	3295026	96	62	NA	NA	NA	71	NA	NA	NA	229	NA	154	NA	FALSE	TRUE	FALSE	NA	NA	NA	FALSE	NA	NA	NA	FALSE	NA	TRUE	TRUE	NA	TRUE
78374346	Crim1	chr17	+	78200248	78376691	7.83741e+07	38.5374	0.0148796	78374005	78374236	231	Crim1:chr17:78374005-78374236:+	Crim1:22	78374346	78374646	253288	2	78374046	78374646	116	NA	NA	NA	NA	261	NA	NA	NA	269	222	NA	NA	FALSE	TRUE	NA	NA	NA	NA	FALSE	NA	NA	NA	FALSE	FALSE	NA	TRUE	NA	TRUE
17484250	Crkl	chr16	+	17451987	17487455	1.74842e+07	99.2077	0.904398	17483903	17484499	596	Crkl:chr16:17483903-17484499:+	Crkl:6	17484250	17484550	20,109,20,109	4	17483950	17484550	114	NA	NA	NA	NA	NA	193	NA	NA	NA	NA	NA	NA	FALSE	TRUE	NA	NA	NA	NA	NA	FALSE	NA	NA	NA	NA	NA	TRUE	NA	TRUE
80588348	Crtc3	chr7	-	80586625	80688877	8.05883e+07	32.6573	0.470858	80588241	80588437	196	Crtc3:chr7:80588241-80588437:-	Crtc3:2	80588048	80588348	0	1	80588048	80588648	NA	NA	NA	NA	NA	NA	NA	NA	NA	NA	176180	150155160165169	NA	FALSE	NA	NA	NA	NA	NA	NA	NA	NA	NA	NA	TRUE	TRUE	TRUE	NA	TRUE
91692658	Cryzl1	chr16	-	91689275	91728975	9.16927e+07	35.4079	1	91692546	91692759	213	Cryzl1:chr16:91692546-91692759:-	Cryzl1:3	91692358	91692658		NA	91692358	91692958	211	NA	NA	119	NA	NA	NA	NA	NA	NA	143	NA	NA	FALSE	FALSE	NA	NA	TRUE	NA	NA	NA	NA	NA	NA	TRUE	NA	TRUE	NA	TRUE
79419960	Csnk1e	chr15	-	79417852	79441999	7.942e+07	16.8979	1	79419899	79420000	101	Csnk1e:chr15:79419899-79420000:-	Csnk1e:3	79419660	79419960	55,42	2	79419660	79420260	153	NA	NA	NA	NA	NA	NA	NA	NA	NA	NA	NA	NA	FALSE	TRUE	NA	NA	NA	NA	NA	NA	NA	NA	NA	NA	NA	TRUE	NA	TRUE
152279050	Csnk2a1	chr2	+	152226839	152288001	1.52279e+08	52.145	1	152278895	152279208	313	Csnk2a1:chr2:152278895-152279208:+	Csnk2a1:8	152279050	152279350	201213275	3	152278750	152279350	247	NA	NA	179	NA	NA	NA	NA	NA	NA	NA	NA	NA	FALSE	FALSE	NA	NA	TRUE	NA	NA	NA	NA	NA	NA	NA	NA	TRUE	NA	TRUE
95452026	Csnk2a2	chr8	-	95446089	95488827	9.5452e+07	73.6241	0.653239	95451771	95452213	442	Csnk2a2:chr8:95451771-95452213:-	Csnk2a2:5	95451726	95452026		NA	95451726	95452326	NA	NA	NA	NA	NA	NA	NA	NA	NA	176	NA	NA	NA	FALSE	NA	NA	NA	NA	NA	NA	NA	NA	NA	TRUE	NA	NA	TRUE	NA	TRUE
10066819	Cspp1	chr1	+	10038217	10136772	1.00669e+07	86.6067	0.541887	10066595	10067114	519	Cspp1:chr1:10066595-10067114:+	Cspp1:11	10066819	10067119	72283298	3	10066519	10067119	NA	NA	153	NA	NA	283	NA	NA	NA	NA	157	NA	285286287288289	FALSE	NA	NA	TRUE	NA	NA	FALSE	NA	NA	NA	NA	TRUE	NA	TRUE	FALSE	TRUE
10067716	Cspp1	chr1	+	10038217	10136772	1.00678e+07	125.54	0.57409	10067388	10068141	753	Cspp1:chr1:10067388-10068141:+	Cspp1:12	10067716	10068016	57260	2	10067416	10068016	92213	NA	NA	NA	223	NA	NA	NA	NA	NA	NA	NA	NA	FALSE	TRUE	NA	NA	NA	FALSE	NA	NA	NA	NA	NA	NA	NA	TRUE	NA	TRUE
5347999	Cst6	chr19	-	5344705	5349574	5347999	44.0611	0.744616	5347866	5348131	265	Cst6:chr19:5347866-5348131:-	Cst6:1	5347699	5347999		NA	5347699	5348299	NA	NA	NA	NA	NA	NA	NA	NA	NA	117	NA	NA	NA	FALSE	NA	NA	NA	NA	NA	NA	NA	NA	NA	TRUE	NA	NA	TRUE	NA	TRUE
134075558	Cstf2	chrX	+	134059197	134086822	1.34076e+08	157.28	0.295474	134075106	134076050	944	Cstf2:chrX:134075106-134076050:+	Cstf2:3	134075558	134075858	275	1	134075258	134075858	NA	NA	250	NA	NA	NA	NA	NA	NA	283	155	135	NA	FALSE	NA	NA	FALSE	NA	NA	NA	NA	NA	NA	FALSE	TRUE	TRUE	TRUE	NA	TRUE
77599760	Ctnna2	chr6	-	76881631	77979699	7.75998e+07	60.4765	1	77599586	77599949	363	Ctnna2:chr6:77599586-77599949:-	Ctnna2:76	77599460	77599760		NA	77599460	77600060	186	NA	NA	NA	NA	NA	NA	266	NA	NA	163	NA	NA	FALSE	FALSE	NA	NA	NA	NA	NA	NA	FALSE	NA	NA	TRUE	NA	TRUE	NA	TRUE
163029868	Ctps2	chrX	+	162901238	163034541	1.6303e+08	32.5717	1	163029745	163029940	195	Ctps2:chrX:163029745-163029940:+	Ctps2:2	163029868	163030168	10	1	163029568	163030168	NA	NA	NA	NA	NA	139	NA	NA	NA	147152	NA	NA	NA	FALSE	NA	NA	NA	NA	NA	TRUE	NA	NA	NA	TRUE	NA	NA	TRUE	NA	TRUE
38531949	Cul4b	chrX	-	38531029	38564525	3.85319e+07	128.212	0.16858	38531488	38532257	769	Cul4b:chrX:38531488-38532257:-	Cul4b:1	38531649	38531949	299	1	38531649	38532249	136	NA	NA	NA	NA	NA	NA	NA	NA	NA	NA	NA	NA	FALSE	TRUE	NA	NA	NA	NA	NA	NA	NA	NA	NA	NA	NA	TRUE	NA	TRUE
53617423	Cul5	chr9	-	53612740	53667507	5.36172e+07	102.041	0.2982	53616912	53617524	612	Cul5:chr9:53616912-53617524:-	Cul5:2	53617123	53617423	273,258,106,87,1	5	53617123	53617723	35	254	NA	NA	68237	NA	NA	109	NA	NA	NA	NA	NA	FALSE	FALSE	FALSE	NA	NA	FALSE	NA	NA	TRUE	NA	NA	NA	NA	TRUE	NA	TRUE
97747104	Cwc25	chr11	-	97745470	97766556	9.77472e+07	15.7596	0.039379	97747118	97747213	95	Cwc25:chr11:97747118-97747213:-	Cwc25:2	97746804	97747104	284,62	2	97746804	97747404	294	NA	109	NA	NA	NA	NA	45	NA	NA	NA	113	NA	FALSE	FALSE	NA	TRUE	NA	NA	NA	NA	FALSE	NA	NA	NA	TRUE	TRUE	NA	TRUE
90892910	Cxcl1	chr5	+	90891241	90893121	9.08929e+07	90.4601	1	90892644	90893121	477	Cxcl1:chr5:90892644-90893121:+	Cxcl1:1	90892910	90893121	21211	2	90892610	90893210	NA	NA	NA	NA	202	184	NA	179	NA	190	NA	NA	NA	FALSE	NA	NA	NA	NA	FALSE	FALSE	NA	TRUE	NA	FALSE	NA	NA	TRUE	NA	TRUE
10589582	Cyb561a3	chr19	+	10577172	10595961	1.05896e+07	132.284	0.485928	10589232	10590026	794	Cyb561a3:chr19:10589232-10590026:+	Cyb561a3:1	10589582	10589882	205247205247	4	10589282	10589882	239275	NA	NA	NA	227	NA	124	NA	NA	NA	NA	NA	NA	FALSE	FALSE	NA	NA	NA	FALSE	NA	TRUE	NA	NA	NA	NA	NA	TRUE	NA	TRUE
69392089	Cyb5d1	chr11	-	69390930	69395333	6.93921e+07	54.7953	1	69391913	69392242	329	Cyb5d1:chr11:69391913-69392242:-	Cyb5d1:2	69391789	69392089		NA	69391789	69392389	157	NA	NA	101143	NA	NA	NA	NA	NA	NA	NA	NA	NA	FALSE	TRUE	NA	NA	TRUE	NA	NA	NA	NA	NA	NA	NA	NA	TRUE	NA	TRUE
50564838	Cycs	chr6	-	50561384	50566538	50564838	81.3143	0.160531	50564594	50565081	487	Cycs:chr6:50564594-50565081:-	Cycs:1	50564538	50564838		NA	50564538	50565138	218	NA	NA	NA	183	NA	NA	NA	NA	143	NA	NA	NA	FALSE	FALSE	NA	NA	NA	FALSE	NA	NA	NA	NA	TRUE	NA	NA	TRUE	NA	TRUE
50565250	Cycs	chr6	-	50561384	50566538	50565250	61.2623	0.679018	50565066	50565433	367	Cycs:chr6:50565066-50565433:-	Cycs:1	50564950	50565250		NA	50564950	50565550	NA	NA	NA	156267	177	140	296	NA	NA	NA	NA	38	NA	FALSE	NA	NA	NA	TRUE	TRUE	TRUE	FALSE	NA	NA	NA	NA	FALSE	TRUE	NA	TRUE
12375016	Cyria	chr12	+	12262139	12380966	1.2375e+07	70.8611	1	12374788	12375213	425	Cyria:chr12:12374788-12375213:+	Cyria:20	12375016	12375316		NA	12374716	12375316	NA	NA	NA	184	250	NA	NA	NA	154	188192196200204	NA	26	NA	FALSE	NA	NA	NA	FALSE	FALSE	NA	NA	NA	TRUE	FALSE	NA	FALSE	TRUE	NA	TRUE
107894929	Czib	chr4	+	107889813	107899533	1.07895e+08	19.9275	1	107894856	107894976	120	Czib:chr4:107894856-107894976:+	Czib:2	107894929	107895229		NA	107894629	107895229	NA	NA	NA	121	NA	NA	NA	NA	125	NA	3	NA	NA	FALSE	NA	NA	NA	TRUE	NA	NA	NA	NA	TRUE	NA	FALSE	NA	TRUE	NA	TRUE
69308089	D130040H23Rik	chr8	+	69271080	69319663	6.93081e+07	51.0319	1	69307931	69308237	306	D130040H23Rik:chr8:69307931-69308237:+	D130040H23Rik:9	69308089	69308389		NA	69307789	69308389	75	NA	NA	NA	99	NA	NA	NA	NA	NA	NA	NA	NA	FALSE	FALSE	NA	NA	NA	TRUE	NA	NA	NA	NA	NA	NA	NA	TRUE	NA	TRUE
69311313	D130040H23Rik	chr8	+	69271080	69319663	6.93113e+07	50.1341	1	69311168	69311469	301	D130040H23Rik:chr8:69311168-69311469:+	D130040H23Rik:10	69311313	69311613		NA	69311013	69311613	259286	NA	NA	NA	NA	NA	NA	NA	NA	177	148	152216	NA	FALSE	FALSE	NA	NA	NA	NA	NA	NA	NA	NA	TRUE	TRUE	TRUE	TRUE	NA	TRUE
78544287	D16Ertd472e	chr16	-	78540318	78576634	7.85445e+07	37.8844	0.016677	78544378	78544605	227	D16Ertd472e:chr16:78544378-78544605:-	D16Ertd472e:2	78543987	78544287	2.83207e+17	6	78543987	78544587	232	NA	NA	NA	187	NA	NA	NA	NA	76291	191195	179	NA	FALSE	FALSE	NA	NA	NA	FALSE	NA	NA	NA	NA	FALSE	FALSE	TRUE	TRUE	NA	TRUE
41757686	D3Ertd751e	chr3	+	41742611	41763096	4.17577e+07	59.539	1	41757511	41757869	358	D3Ertd751e:chr3:41757511-41757869:+	D3Ertd751e:4	41757686	41757986	70250	2	41757386	41757986	NA	NA	126	152	238	NA	NA	223269	174	49206	202	218	NA	FALSE	NA	NA	TRUE	TRUE	FALSE	NA	NA	FALSE	TRUE	FALSE	FALSE	FALSE	TRUE	NA	TRUE
36600641	D5Ertd579e	chr5	-	36600485	36696024	3.66006e+07	51.1899	0.744051	36600485	36600787	302	D5Ertd579e:chr5:36600485-36600787:-	D5Ertd579e:1	36600485	36600641		NA	36600341	36600941	NA	NA	NA	NA	NA	NA	NA	NA	NA	140	NA	NA	NA	FALSE	NA	NA	NA	NA	NA	NA	NA	NA	NA	TRUE	NA	NA	TRUE	NA	TRUE
38127667	D630045J12Rik	chr6	-	38123174	38253955	3.81277e+07	58.1486	0.590026	38127554	38127903	349	D630045J12Rik:chr6:38127554-38127903:-	D630045J12Rik:3	38127367	38127667	210,80	2	38127367	38127967	NA	NA	NA	NA	NA	NA	NA	NA	NA	NA	128134	NA	NA	FALSE	NA	NA	NA	NA	NA	NA	NA	NA	NA	NA	TRUE	NA	TRUE	NA	TRUE
3234358	D830030K20Rik	chr14	+	3208577	3234562	3.23427e+06	123.493	0.627706	3233897	3234562	665	D830030K20Rik:chr14:3233897-3234562:+	D830030K20Rik:4	3234358	3234562		NA	3234058	3234658	NA	NA	NA	NA	183	NA	NA	NA	NA	NA	NA	176	NA	FALSE	NA	NA	NA	NA	FALSE	NA	NA	NA	NA	NA	NA	TRUE	TRUE	NA	TRUE
113835675	Dach2	chrX	+	113297510	113836386	1.13836e+08	65.3751	1	113835487	113835880	393	Dach2:chrX:113835487-113835880:+	Dach2:6	113835675	113835975	218	1	113835375	113835975	167	NA	NA	NA	NA	NA	NA	NA	NA	197	NA	NA	NA	FALSE	TRUE	NA	NA	NA	NA	NA	NA	NA	NA	FALSE	NA	NA	TRUE	NA	TRUE
66271987	Dapk2	chr9	+	66158223	66272242	6.62719e+07	101.403	0.246308	66271635	66272242	607	Dapk2:chr9:66271635-66272242:+	Dapk2:4	66271987	66272242	4253	2	66271687	66272287	NA	NA	NA	NA	235	99	NA	NA	NA	NA	NA	NA	NA	FALSE	NA	NA	NA	NA	FALSE	TRUE	NA	NA	NA	NA	NA	NA	TRUE	NA	TRUE
49631671	Dbx1	chr7	-	49631499	49636849	4.96317e+07	60.2251	1	49631499	49631843	344	Dbx1:chr7:49631499-49631843:-	Dbx1:1	49631499	49631671		NA	49631371	49631971	37	NA	NA	NA	NA	NA	NA	NA	NA	156	NA	NA	NA	FALSE	FALSE	NA	NA	NA	NA	NA	NA	NA	NA	TRUE	NA	NA	TRUE	NA	TRUE
44788217	Dcaf12l1	chrX	-	44786565	44790161	4.47882e+07	159.333	0.0585654	44787690	44788646	956	Dcaf12l1:chrX:44787690-44788646:-	Dcaf12l1:2	44787917	44788217	238,223,60	3	44787917	44788517	NA	NA	NA	NA	NA	NA	NA	274	NA	203	105282	NA	278279280281282	FALSE	NA	NA	NA	NA	NA	NA	NA	FALSE	NA	FALSE	TRUE	NA	TRUE	FALSE	TRUE
71082028	Dcaf17	chr2	+	71055744	71103647	7.1082e+07	38.8957	1	71081894	71082128	234	Dcaf17:chr2:71081894-71082128:+	Dcaf17:4	71082028	71082328	25,69,223,238	4	71081728	71082328	NA	NA	NA	NA	159199	55	NA	114	NA	NA	NA	194	NA	FALSE	NA	NA	NA	NA	TRUE	FALSE	NA	TRUE	NA	NA	NA	FALSE	TRUE	NA	TRUE
165329608	Dcaf6	chr1	-	165326305	165460465	165329608	36.9247	0.340627	165329497	165329718	221	Dcaf6:chr1:165329497-165329718:-	Dcaf6:1	165329308	165329608	105,51	2	165329308	165329908	NA	NA	NA	NA	76	NA	NA	NA	NA	33	NA	166	NA	FALSE	NA	NA	NA	NA	FALSE	NA	NA	NA	NA	FALSE	NA	TRUE	TRUE	NA	TRUE
52321097	Dcbld1	chr10	+	52233637	52321378	5.23211e+07	114.067	0.301243	52320731	52321378	647	Dcbld1:chr10:52320731-52321378:+	Dcbld1:15	52321097	52321378	46101233280	4	52320797	52321397	NA	NA	NA	NA	NA	NA	NA	9	NA	260	71	89,93	NA	FALSE	NA	NA	NA	NA	NA	NA	NA	FALSE	NA	FALSE	FALSE	TRUE	TRUE	NA	TRUE
103806945	Dclre1b	chr3	-	103800596	103809389	1.03807e+08	82.5371	1	103806715	103807210	495	Dclre1b:chr3:103806715-103807210:-	Dclre1b:4	103806645	103806945		NA	103806645	103807245	NA	NA	NA	NA	NA	NA	NA	NA	NA	137154	160	142147	NA	FALSE	NA	NA	NA	NA	NA	NA	NA	NA	NA	TRUE	TRUE	TRUE	TRUE	NA	TRUE
35894028	Dcun1d1	chr3	-	35882852	35932334	3.58939e+07	171.711	0.631147	35893364	35894394	1030	Dcun1d1:chr3:35893364-35894394:-	Dcun1d1:2	35893728	35894028	211	1	35893728	35894328	210	160	NA	NA	103186	70	NA	NA	158	NA	NA	NA	NA	FALSE	FALSE	TRUE	NA	NA	TRUE	FALSE	NA	NA	TRUE	NA	NA	NA	TRUE	NA	TRUE
35895353	Dcun1d1	chr3	-	35882852	35932334	3.58953e+07	127.948	0.610515	35894933	35895701	768	Dcun1d1:chr3:35894933-35895701:-	Dcun1d1:3	35895053	35895353	271,86,34	3	35895053	35895653	NA	134	NA	57	103	NA	NA	115	NA	NA	NA	NA	NA	FALSE	NA	TRUE	NA	FALSE	TRUE	NA	NA	TRUE	NA	NA	NA	NA	TRUE	NA	TRUE
73560327	Dcun1d4	chr5	+	73481000	73560879	7.35605e+07	115.944	0.152659	73560108	73560804	696	Dcun1d4:chr5:73560108-73560804:+	Dcun1d4:7	73560327	73560627	286	1	73560027	73560627	NA	144	NA	224	NA	NA	NA	NA	NA	NA	NA	NA	NA	FALSE	NA	TRUE	NA	FALSE	NA	NA	NA	NA	NA	NA	NA	NA	TRUE	NA	TRUE
141679199	Ddi2	chr4	-	141677549	141723419	1.41679e+08	77.3202	1	141678979	141679443	464	Ddi2:chr4:141678979-141679443:-	Ddi2:2	141678899	141679199		NA	141678899	141679499	166	NA	NA	NA	NA	NA	NA	NA	NA	NA	NA	170	NA	FALSE	TRUE	NA	NA	NA	NA	NA	NA	NA	NA	NA	NA	TRUE	TRUE	NA	TRUE
92857756	Ddias	chr7	-	92857522	92874247	9.28577e+07	68.1694	0.693015	92857539	92857948	409	Ddias:chr7:92857539-92857948:-	Ddias:1	92857522	92857756	227	1	92857456	92858056	176	155	NA	NA	NA	210	NA	NA	194	NA	NA	NA	NA	FALSE	TRUE	TRUE	NA	NA	NA	FALSE	NA	NA	FALSE	NA	NA	NA	TRUE	NA	TRUE
110975981	Ddx19a	chr8	-	110971704	110997800	1.10976e+08	50.6387	1	110975828	110976132	304	Ddx19a:chr8:110975828-110976132:-	Ddx19a:2	110975681	110975981		NA	110975681	110976281	NA	NA	NA	NA	NA	NA	NA	NA	151	NA	132	NA	NA	FALSE	NA	NA	NA	NA	NA	NA	NA	NA	TRUE	NA	TRUE	NA	TRUE	NA	TRUE
111005380	Ddx19b	chr8	-	111003184	111027764	1.11005e+08	51.2743	1	111005220	111005527	307	Ddx19b:chr8:111005220-111005527:-	Ddx19b:2	111005080	111005380	205	1	111005080	111005680	NA	249	NA	NA	NA	142	NA	NA	NA	185	NA	177181190195	NA	FALSE	NA	FALSE	NA	NA	NA	TRUE	NA	NA	NA	FALSE	NA	TRUE	TRUE	NA	TRUE
83723136	Ddx39a	chr8	+	83715272	83726892	83723136	51.9002	0.268542	83722980	83723291	311	Ddx39a:chr8:83722980-83723291:+	Ddx39a:1	83723136	83723436	32,72	2	83722836	83723436	NA	NA	NA	NA	NA	NA	NA	NA	NA	124	NA	NA	NA	FALSE	NA	NA	NA	NA	NA	NA	NA	NA	NA	TRUE	NA	NA	TRUE	NA	TRUE
40402000	Dennd11	chr6	-	40401374	40436135	4.04019e+07	189.24	0.121142	40401374	40402486	1112	Dennd11:chr6:40401374-40402486:-	Dennd11:1	40401700	40402000		NA	40401700	40402300	224	NA	91130	NA	NA	NA	NA	NA	153	NA	NA	95	NA	FALSE	FALSE	NA	TRUE	NA	NA	NA	NA	NA	TRUE	NA	NA	TRUE	TRUE	NA	TRUE
90283854	Dennd4b	chr3	+	90265185	90285073	9.02839e+07	33.4107	0.73126	90283750	90283951	201	Dennd4b:chr3:90283750-90283951:+	Dennd4b:2	90283854	90284154		NA	90283554	90284154	149	NA	175	138	NA	NA	NA	221	NA	NA	NA	NA	32,33,34,35,36,37,38,39,40,41,42,43,44,45,46,47,48,49	FALSE	TRUE	NA	TRUE	TRUE	NA	NA	NA	FALSE	NA	NA	NA	NA	TRUE	FALSE	TRUE
148988279	Dennd5b	chr6	-	148988069	149101680	1.48989e+08	30.4366	0.0751377	148988429	148988612	183	Dennd5b:chr6:148988429-148988612:-	Dennd5b:1	148988069	148988279	207,86	2	148987979	148988579	156	77	NA	NA	NA	NA	NA	NA	75	189	NA	NA	NA	FALSE	TRUE	FALSE	NA	NA	NA	NA	NA	NA	FALSE	FALSE	NA	NA	TRUE	NA	TRUE
108389350	Depdc1b	chr13	+	108316332	108393552	1.08389e+08	35.5378	0.0160489	108389064	108389278	214	Depdc1b:chr13:108389064-108389278:+	Depdc1b:2	108389350	108389650	209235	2	108389050	108389650	NA	100	NA	NA	NA	NA	NA	NA	138	186	NA	NA	NA	FALSE	NA	TRUE	NA	NA	NA	NA	NA	NA	TRUE	FALSE	NA	NA	TRUE	NA	TRUE
57871695	Derl1	chr15	-	57868421	57892448	5.78717e+07	75.6111	1	57871484	57871937	453	Derl1:chr15:57871484-57871937:-	Derl1:3	57871395	57871695	252	1	57871395	57871995	NA	NA	NA	NA	NA	NA	NA	NA	NA	NA	NA	144	NA	FALSE	NA	NA	NA	NA	NA	NA	NA	NA	NA	NA	NA	TRUE	TRUE	NA	TRUE
149120388	Dffa	chr4	+	149104146	149123710	1.4912e+08	102.416	0.303349	149120071	149120686	615	Dffa:chr4:149120071-149120686:+	Dffa:5	149120388	149120688	2,38,258	3	149120088	149120688	NA	NA	NA	NA	NA	NA	NA	NA	NA	170240	NA	NA	NA	FALSE	NA	NA	NA	NA	NA	NA	NA	NA	NA	TRUE	NA	NA	TRUE	NA	TRUE
89035331	Dgke	chr11	-	89035179	89066850	8.90353e+07	80.6668	1	89035179	89035573	394	Dgke:chr11:89035179-89035573:-	Dgke:1	89035179	89035331		NA	89035031	89035631	NA	NA	NA	NA	NA	NA	NA	NA	142	130	NA	NA	NA	FALSE	NA	NA	NA	NA	NA	NA	NA	NA	TRUE	TRUE	NA	NA	TRUE	NA	TRUE
92385362	Dhfr	chr13	+	92354726	92389871	9.23854e+07	53.6816	0.292534	92385198	92385520	322	Dhfr:chr13:92385198-92385520:+	Dhfr:4	92385362	92385662	250	1	92385062	92385662	NA	296	NA	NA	NA	25	287	237264	NA	NA	179183	NA	NA	FALSE	NA	FALSE	NA	NA	NA	FALSE	FALSE	FALSE	NA	NA	TRUE	NA	TRUE	NA	TRUE
92387558	Dhfr	chr13	+	92354726	92389871	9.23876e+07	118.657	0.936117	92387291	92388003	712	Dhfr:chr13:92387291-92388003:+	Dhfr:6	92387558	92387858	227	1	92387258	92387858	154	202	NA	172	NA	NA	NA	NA	NA	NA	118122126183266	NA	NA	FALSE	TRUE	FALSE	NA	TRUE	NA	NA	NA	NA	NA	NA	TRUE	NA	TRUE	NA	TRUE
98890464	Dhh	chr15	-	98890339	98898540	9.88904e+07	35.5198	1	98890339	98890546	207	Dhh:chr15:98890339-98890546:-	Dhh:1	98890339	98890464		NA	98890164	98890764	NA	NA	NA	NA	NA	NA	NA	43	109	114	NA	NA	NA	FALSE	NA	NA	NA	NA	NA	NA	NA	FALSE	TRUE	TRUE	NA	NA	TRUE	NA	TRUE
94519163	Dipk2a	chr9	-	94517843	94538081	9.45191e+07	100.529	0.528476	94518822	94519426	604	Dipk2a:chr9:94518822-94519426:-	Dipk2a:2	94518863	94519163	255223204	3	94518863	94519463	54106	NA	NA	NA	239	187	NA	NA	NA	NA	NA	78	NA	FALSE	TRUE	NA	NA	NA	FALSE	FALSE	NA	NA	NA	NA	NA	FALSE	TRUE	NA	TRUE
125090987	Disc1	chr8	+	125054195	125265290	1.25091e+08	13.7647	0.153584	125090945	125091028	83	Disc1:chr8:125090945-125091028:+	Disc1:1	125090987	125091287	8	1	125090687	125091287	NA	NA	NA	NA	NA	NA	169	NA	NA	NA	187	NA	0,1,2,3,4,5,6,7,8,9,10,11,12,13,14,15,16,17	FALSE	NA	NA	NA	NA	NA	NA	TRUE	NA	NA	NA	FALSE	NA	TRUE	FALSE	TRUE
132179521	Dkk2	chr3	+	132085292	132180304	1.3218e+08	70.7732	1	132179294	132179719	425	Dkk2:chr3:132179294-132179719:+	Dkk2:2	132179521	132179821	39	1	132179221	132179821	NA	NA	NA	NA	33	NA	NA	NA	NA	78282	84,91,102,142,146,150,154,158,162,166,170,180,184,216,220,224,228,232,236,240,244,248,286	NA	NA	FALSE	NA	NA	NA	NA	FALSE	NA	NA	NA	NA	FALSE	TRUE	NA	TRUE	NA	TRUE
70821148	Dlgap1	chr17	+	69969073	70821413	7.0821e+07	65.3298	0.143071	70820816	70821208	392	Dlgap1:chr17:70820816-70821208:+	Dlgap1:82	70821148	70821413	214257265	3	70820848	70821448	42	NA	NA	NA	NA	NA	NA	NA	NA	177181240	NA	NA	NA	FALSE	FALSE	NA	NA	NA	NA	NA	NA	NA	NA	TRUE	NA	NA	TRUE	NA	TRUE
71533211	Dlx1	chr2	+	71528113	71533981	7.15332e+07	56.0666	0.0815121	71533047	71533384	337	Dlx1:chr2:71533047-71533384:+	Dlx1:2	71533211	71533511	81	1	71532911	71533511	NA	NA	NA	NA	169	NA	NA	NA	NA	NA	186269	181	NA	FALSE	NA	NA	NA	NA	TRUE	NA	NA	NA	NA	NA	FALSE	FALSE	TRUE	NA	TRUE
25678783	Dmrt2	chr19	+	25672411	25683051	2.56788e+07	72.3562	1	25678577	25679011	434	Dmrt2:chr19:25678577-25679011:+	Dmrt2:1	25678783	25679083	49204	2	25678483	25679083	12116	31	NA	NA	NA	NA	NA	NA	NA	184	35	NA	NA	FALSE	TRUE	FALSE	NA	NA	NA	NA	NA	NA	NA	FALSE	FALSE	NA	TRUE	NA	TRUE
89692614	Dmrta1	chr4	+	89688198	89694772	8.96926e+07	116.201	1	89692276	89692973	697	Dmrta1:chr4:89692276-89692973:+	Dmrta1:1	89692614	89692914	245	1	89692314	89692914	170	NA	191	NA	NA	NA	NA	NA	NA	221	NA	NA	NA	FALSE	TRUE	NA	FALSE	NA	NA	NA	NA	NA	NA	FALSE	NA	NA	TRUE	NA	TRUE
9119156	Dmtf1	chr5	-	9118801	9161776	9.11918e+06	118.678	0.443282	9118825	9119537	712	Dmtf1:chr5:9118825-9119537:-	Dmtf1:1	9118856	9119156	286,94	2	9118856	9119456	NA	118	NA	NA	NA	NA	NA	NA	NA	261	3	8	NA	FALSE	NA	TRUE	NA	NA	NA	NA	NA	NA	NA	FALSE	FALSE	FALSE	TRUE	NA	TRUE
9119381	Dmtf1	chr5	-	9118801	9161776	9.1196e+06	50.3619	0.00905759	9119452	9119754	302	Dmtf1:chr5:9119452-9119754:-	Dmtf1:1	9119081	9119381	221,47	2	9119081	9119681	198	97	NA	NA	28	NA	NA	NA	NA	NA	228	205233	NA	FALSE	FALSE	TRUE	NA	NA	FALSE	NA	NA	NA	NA	NA	FALSE	FALSE	TRUE	NA	TRUE
72972817	Dnaaf4	chr9	+	72958785	72973687	7.29727e+07	73.6519	0.333074	72972448	72972890	442	Dnaaf4:chr9:72972448-72972890:+	Dnaaf4:3	72972817	72973117	12246	2	72972517	72973117	NA	NA	NA	NA	NA	NA	NA	NA	127	229	214225	41	NA	FALSE	NA	NA	NA	NA	NA	NA	NA	NA	TRUE	FALSE	FALSE	FALSE	TRUE	NA	TRUE
54715199	Dnaja4	chr9	+	54699559	54716317	5.47152e+07	64.9533	1	54715014	54715403	389	Dnaja4:chr9:54715014-54715403:+	Dnaja4:1	54715199	54715499	209	1	54714899	54715499	174	NA	NA	NA	NA	NA	NA	NA	NA	186	NA	NA	NA	FALSE	TRUE	NA	NA	NA	NA	NA	NA	NA	NA	FALSE	NA	NA	TRUE	NA	TRUE
137915105	Dnajb14	chr3	+	137867675	137916557	1.37915e+08	63.8487	0.198831	137914887	137915270	383	Dnajb14:chr3:137914887-137915270:+	Dnajb14:6	137915105	137915405		NA	137914805	137915405	NA	NA	NA	NA	NA	NA	NA	NA	NA	166173186	NA	179	NA	FALSE	NA	NA	NA	NA	NA	NA	NA	NA	NA	TRUE	NA	TRUE	TRUE	NA	TRUE
35674411	Dnajc18	chr18	-	35670846	35703121	3.56744e+07	54.2568	1	35674246	35674571	325	Dnajc18:chr18:35674246-35674571:-	Dnajc18:2	35674111	35674411		NA	35674111	35674711	NA	NA	NA	NA	NA	1	NA	NA	NA	NA	NA	157161165169	NA	FALSE	NA	NA	NA	NA	NA	FALSE	NA	NA	NA	NA	NA	TRUE	TRUE	NA	TRUE
21774947	Dnajc2	chr5	-	21757264	21785251	2.1775e+07	41.9162	1	21774856	21775108	252	Dnajc2:chr5:21774856-21775108:-	Dnajc2:6	21774647	21774947		NA	21774647	21775247	NA	96	NA	NA	NA	NA	NA	NA	NA	NA	NA	NA	NA	FALSE	NA	TRUE	NA	NA	NA	NA	NA	NA	NA	NA	NA	NA	TRUE	NA	TRUE
91615872	Dnajc28	chr16	-	91613199	91618999	9.16159e+07	58.0865	1	91615714	91616063	349	Dnajc28:chr16:91615714-91616063:-	Dnajc28:2	91615572	91615872		NA	91615572	91616172	NA	NA	NA	NA	NA	NA	NA	55118179	NA	NA	186	142	NA	FALSE	NA	NA	NA	NA	NA	NA	NA	TRUE	NA	NA	FALSE	TRUE	TRUE	NA	TRUE
153686497	Dnmt3b	chr2	+	153649450	153687730	1.53687e+08	73.7235	0.623049	153686327	153686769	442	Dnmt3b:chr2:153686327-153686769:+	Dnmt3b:3	153686497	153686797		NA	153686197	153686797	159	NA	NA	NA	NA	NA	NA	NA	NA	NA	NA	244248260267	263264265266267	FALSE	TRUE	NA	NA	NA	NA	NA	NA	NA	NA	NA	NA	FALSE	TRUE	FALSE	TRUE
170879434	Dok5	chr2	+	170731807	170879775	1.70879e+08	118.189	0.162079	170879107	170879775	668	Dok5:chr2:170879107-170879775:+	Dok5:3	170879434	170879734		NA	170879134	170879734	108	NA	NA	NA	NA	NA	NA	NA	NA	NA	NA	NA	NA	FALSE	TRUE	NA	NA	NA	NA	NA	NA	NA	NA	NA	NA	NA	TRUE	NA	TRUE
89292632	Dok6	chr18	-	89292423	89769528	8.92929e+07	41.6588	0.0507418	89292790	89293040	250	Dok6:chr18:89292790-89293040:-	Dok6:1	89292423	89292632	209,29	2	89292332	89292932	NA	NA	NA	NA	11	NA	147	NA	NA	186	NA	NA	NA	FALSE	NA	NA	NA	NA	FALSE	NA	TRUE	NA	NA	FALSE	NA	NA	TRUE	NA	TRUE
89293263	Dok6	chr18	-	89292423	89769528	8.92932e+07	45.0343	0.29203	89293044	89293314	270	Dok6:chr18:89293044-89293314:-	Dok6:1	89292963	89293263		NA	89292963	89293563	47	NA	NA	NA	213	NA	NA	286	NA	206220	72,89	121	216	FALSE	FALSE	NA	NA	NA	FALSE	NA	NA	FALSE	NA	FALSE	FALSE	TRUE	TRUE	FALSE	TRUE
89293865	Dok6	chr18	-	89292423	89769528	8.92939e+07	70.2446	1	89293649	89294071	422	Dok6:chr18:89293649-89294071:-	Dok6:2	89293565	89293865		NA	89293565	89294165	NA	89157	NA	NA	NA	NA	NA	250	NA	135	NA	NA	NA	FALSE	NA	TRUE	NA	NA	NA	NA	NA	FALSE	NA	TRUE	NA	NA	TRUE	NA	TRUE
83205308	Dpf3	chr12	-	83205180	83487716	8.32053e+07	49.4605	0.724438	83205180	83205457	277	Dpf3:chr12:83205180-83205457:-	Dpf3:1	83205180	83205308	108	1	83205008	83205608	NA	NA	NA	NA	NA	NA	NA	120	NA	124	NA	NA	NA	FALSE	NA	NA	NA	NA	NA	NA	NA	TRUE	NA	TRUE	NA	NA	TRUE	NA	TRUE
83205418	Dpf3	chr12	-	83205180	83487716	8.32054e+07	66.5452	0.275562	83205236	83205635	399	Dpf3:chr12:83205236-83205635:-	Dpf3:1	83205180	83205418	218	1	83205118	83205718	NA	NA	NA	NA	NA	NA	NA	230	NA	107234	NA	NA	NA	FALSE	NA	NA	NA	NA	NA	NA	NA	FALSE	NA	TRUE	NA	NA	TRUE	NA	TRUE
24412158	Dpy19l1	chr9	-	24411201	24503140	2.44121e+07	35.7762	0.0429744	24411965	24412179	214	Dpy19l1:chr9:24411965-24412179:-	Dpy19l1:1	24411858	24412158	211,42,211,42	4	24411858	24412458	NA	NA	NA	NA	53159191	NA	NA	NA	NA	NA	120	163	NA	FALSE	NA	NA	NA	NA	TRUE	NA	NA	NA	NA	NA	TRUE	TRUE	TRUE	NA	TRUE
24412212	Dpy19l1	chr9	-	24411201	24503140	2.44122e+07	79.7813	0.0906429	24411984	24412463	479	Dpy19l1:chr9:24411984-24412463:-	Dpy19l1:1	24411912	24412212	265,96,17,265,96,17	6	24411912	24412512	NA	NA	NA	NA	107213245	NA	NA	NA	NA	NA	174	217	NA	FALSE	NA	NA	NA	NA	TRUE	NA	NA	NA	NA	NA	TRUE	FALSE	TRUE	NA	TRUE
35689673	Dpy19l3	chr7	-	35685165	35754454	3.56896e+07	31.5196	0.0718909	35689530	35689719	189	Dpy19l3:chr7:35689530-35689719:-	Dpy19l3:3	35689373	35689673	241,220,90,79,46	5	35689373	35689973	114	NA	NA	NA	53	NA	NA	70	NA	144	NA	NA	NA	FALSE	TRUE	NA	NA	NA	FALSE	NA	NA	FALSE	NA	TRUE	NA	NA	TRUE	NA	TRUE
66804985	Dpysl2	chr14	-	66802837	66868688	6.6805e+07	140.79	1	66804590	66805435	845	Dpysl2:chr14:66804590-66805435:-	Dpysl2:2	66804685	66804985	6	1	66804685	66805285	24,34	NA	NA	NA	NA	NA	105	NA	NA	NA	NA	NA	NA	FALSE	FALSE	NA	NA	NA	NA	NA	TRUE	NA	NA	NA	NA	NA	TRUE	NA	TRUE
134456325	Drp2	chrX	+	134404628	134456573	1.34456e+08	32.2801	0.199252	134456188	134456382	194	Drp2:chrX:134456188-134456382:+	Drp2:6	134456325	134456573	247	1	134456025	134456625	NA	NA	141	NA	49	NA	NA	NA	NA	230	NA	NA	NA	FALSE	NA	NA	TRUE	NA	FALSE	NA	NA	NA	NA	FALSE	NA	NA	TRUE	NA	TRUE
156995626	Dsn1	chr2	-	156993258	157007075	1.56996e+08	135.239	0.199636	156995148	156995959	811	Dsn1:chr2:156995148-156995959:-	Dsn1:3	156995326	156995626	246,205,66	3	156995326	156995926	65178	NA	NA	NA	NA	185	NA	NA	NA	228	NA	NA	NA	FALSE	TRUE	NA	NA	NA	NA	FALSE	NA	NA	NA	FALSE	NA	NA	TRUE	NA	TRUE
132466464	Dstyk	chr1	+	132417555	132468425	1.32467e+08	47.1298	0.499151	132466388	132466671	283	Dstyk:chr1:132466388-132466671:+	Dstyk:7	132466464	132466764	263	1	132466164	132466764	172	202	NA	NA	NA	NA	NA	NA	NA	231	NA	244	NA	FALSE	TRUE	FALSE	NA	NA	NA	NA	NA	NA	NA	FALSE	NA	FALSE	TRUE	NA	TRUE
23634202	Dtna	chr18	+	23415442	23663881	2.36342e+07	49.5065	1	23634058	23634355	297	Dtna:chr18:23634058-23634355:+	Dtna:7	23634202	23634502	216	1	23633902	23634502	NA	NA	NA	NA	NA	NA	NA	NA	NA	196	158163	NA	NA	FALSE	NA	NA	NA	NA	NA	NA	NA	NA	NA	FALSE	TRUE	NA	TRUE	NA	TRUE
49696911	Dtwd2	chr18	-	49696145	49755601	4.96969e+07	42.2243	0.298131	49696796	49697049	253	Dtwd2:chr18:49696796-49697049:-	Dtwd2:1	49696611	49696911	104	1	49696611	49697211	200	90	NA	NA	NA	NA	NA	3	NA	81	289	NA	NA	FALSE	FALSE	TRUE	NA	NA	NA	NA	NA	FALSE	NA	FALSE	FALSE	NA	TRUE	NA	TRUE
80633785	Dusp19	chr2	+	80617045	80636050	8.06338e+07	45.2958	0.145514	80633653	80633925	272	Dusp19:chr2:80633653-80633925:+	Dusp19:4	80633785	80634085		NA	80633485	80634085	224	NA	NA	NA	138	NA	NA	NA	NA	1.42146e+26	250	187193	NA	FALSE	FALSE	NA	NA	NA	TRUE	NA	NA	NA	NA	TRUE	FALSE	FALSE	TRUE	NA	TRUE
34819655	Dusp4	chr8	+	34807297	34822564	3.48196e+07	112.551	0.466519	34819237	34819912	675	Dusp4:chr8:34819237-34819912:+	Dusp4:2	34819655	34819955	239	1	34819355	34819955	NA	NA	NA	NA	NA	NA	88	94	NA	217	162	NA	NA	FALSE	NA	NA	NA	NA	NA	NA	FALSE	TRUE	NA	FALSE	TRUE	NA	TRUE	NA	TRUE
106375219	Dusp7	chr9	+	106368632	106375724	1.06375e+08	116.71	0.183876	106374881	106375581	700	Dusp7:chr9:106374881-106375581:+	Dusp7:1	106375219	106375519	295	1	106374919	106375519	171	NA	NA	NA	NA	NA	NA	NA	NA	NA	NA	218225	NA	FALSE	TRUE	NA	NA	NA	NA	NA	NA	NA	NA	NA	NA	FALSE	TRUE	NA	TRUE
142081836	Dusp8	chr7	-	142079487	142095272	1.42082e+08	125.667	0.169152	142081379	142082133	754	Dusp8:chr7:142081379-142082133:-	Dusp8:2	142081536	142081836	266,109,55,45	4	142081536	142082136	174	19,36	NA	NA	NA	86	NA	NA	23	NA	NA	NA	NA	FALSE	TRUE	FALSE	NA	NA	NA	FALSE	NA	NA	FALSE	NA	NA	NA	TRUE	NA	TRUE
114723372	Dync1li1	chr9	+	114688790	114724319	1.14723e+08	89.0256	0.0856547	114723185	114723719	534	Dync1li1:chr9:114723185-114723719:+	Dync1li1:4	114723372	114723672		NA	114723072	114723672	155	NA	NA	NA	NA	NA	NA	NA	NA	NA	176	3	NA	FALSE	TRUE	NA	NA	NA	NA	NA	NA	NA	NA	NA	TRUE	FALSE	TRUE	NA	TRUE
6310671	Dynlt1a	chr17	-	6306344	6317500	6.3107e+06	64.135	0.986957	6310508	6310892	384	Dynlt1a:chr17:6310508-6310892:-	Dynlt1a:1	6310371	6310671		NA	6310371	6310971	NA	NA	NA	NA	123	NA	NA	NA	NA	108	NA	NA	NA	FALSE	NA	NA	NA	NA	TRUE	NA	NA	NA	NA	TRUE	NA	NA	TRUE	NA	TRUE
6310722	Dynlt1a	chr17	-	6306344	6317500	6.31091e+06	18.9442	0.0130433	6310857	6310971	114	Dynlt1a:chr17:6310857-6310971:-	Dynlt1a:1	6310422	6310722		NA	6310422	6311022	NA	NA	NA	NA	174	NA	NA	NA	NA	159	NA	NA	NA	FALSE	NA	NA	NA	NA	TRUE	NA	NA	NA	NA	TRUE	NA	NA	TRUE	NA	TRUE
6607770	Dynlt1c	chr17	+	6601671	6609679	6607770	59.4425	0.165104	6607591	6607948	357	Dynlt1c:chr17:6607591-6607948:+	Dynlt1c:2	6607770	6608070		NA	6607470	6608070	NA	NA	NA	NA	126	NA	NA	NA	NA	111	NA	NA	NA	FALSE	NA	NA	NA	NA	TRUE	NA	NA	NA	NA	TRUE	NA	NA	TRUE	NA	TRUE
14991418	Dynlt2a2	chr17	-	14990821	15041537	1.49914e+07	122.694	0.582085	14991066	14991802	736	Dynlt2a2:chr17:14991066-14991802:-	Dynlt2a2:1	14991118	14991418	217	1	14991118	14991718	46106	NA	NA	NA	187	NA	NA	NA	NA	NA	NA	NA	NA	FALSE	TRUE	NA	NA	NA	FALSE	NA	NA	NA	NA	NA	NA	NA	TRUE	NA	TRUE
15009375	Dynlt2a2	chr17	-	14990821	15041537	15009375	120.175	0.36544	15009014	15009735	721	Dynlt2a2:chr17:15009014-15009735:-	Dynlt2a2:4	15009075	15009375		NA	15009075	15009675	NA	NA	NA	NA	NA	NA	NA	NA	NA	NA	259	158267	NA	FALSE	NA	NA	NA	NA	NA	NA	NA	NA	NA	NA	FALSE	TRUE	TRUE	NA	TRUE
14964341	Dynlt2a3	chr17	-	14964189	14978790	1.49643e+07	30.2981	1	14964227	14964409	182	Dynlt2a3:chr17:14964227-14964409:-	Dynlt2a3:1	14964189	14964341	99,99	2	14964041	14964641	NA	NA	NA	NA	NA	NA	NA	NA	NA	132	NA	NA	NA	FALSE	NA	NA	NA	NA	NA	NA	NA	NA	NA	TRUE	NA	NA	TRUE	NA	TRUE
9655788	Dynlt3	chrX	-	9654263	9663003	9.65576e+06	145.946	0.0633521	9655322	9656198	876	Dynlt3:chrX:9655322-9656198:-	Dynlt3:1	9655488	9655788	210	1	9655488	9656088	NA	18	NA	NA	NA	NA	NA	NA	176	NA	NA	184	NA	FALSE	NA	FALSE	NA	NA	NA	NA	NA	NA	TRUE	NA	NA	FALSE	TRUE	NA	TRUE
118876350	Dzip1	chr14	-	118874744	118923167	1.18876e+08	99.1835	0.933988	118876111	118876706	595	Dzip1:chr14:118876111-118876706:-	Dzip1:2	118876050	118876350	292,97,40	3	118876050	118876650	NA	NA	NA	NA	NA	75	NA	NA	NA	NA	117	11165	NA	FALSE	NA	NA	NA	NA	NA	FALSE	NA	NA	NA	NA	TRUE	TRUE	TRUE	NA	TRUE
118877185	Dzip1	chr14	-	118874744	118923167	1.18877e+08	63.6845	0.720657	118876931	118877313	382	Dzip1:chr14:118876931-118877313:-	Dzip1:3	118876885	118877185	266230202	3	118876885	118877485	NA	NA	NA	206	NA	NA	NA	NA	NA	NA	NA	158	NA	FALSE	NA	NA	NA	FALSE	NA	NA	NA	NA	NA	NA	NA	TRUE	TRUE	NA	TRUE
48924552	Dzip3	chr16	-	48924228	48994165	4.89246e+07	101.423	0.0928331	48924303	48924912	609	Dzip3:chr16:48924303-48924912:-	Dzip3:1	48924252	48924552	285	1	48924252	48924852	134	157	NA	NA	NA	NA	NA	NA	NA	NA	109115120	17	NA	FALSE	TRUE	TRUE	NA	NA	NA	NA	NA	NA	NA	NA	TRUE	FALSE	TRUE	NA	TRUE
48924612	Dzip3	chr16	-	48924228	48994165	4.89246e+07	60.782	0.146773	48924378	48924743	365	Dzip3:chr16:48924378-48924743:-	Dzip3:1	48924312	48924612		NA	48924312	48924912	194	217	NA	NA	NA	NA	NA	NA	NA	NA	169175180	77	NA	FALSE	FALSE	FALSE	NA	NA	NA	NA	NA	NA	NA	NA	TRUE	FALSE	TRUE	NA	TRUE
48924664	Dzip3	chr16	-	48924228	48994165	4.89249e+07	52.0881	0.0301654	48924694	48925007	313	Dzip3:chr16:48924694-48925007:-	Dzip3:1	48924364	48924664		NA	48924364	48924964	23246	269	NA	NA	NA	NA	NA	NA	NA	NA	11221227232	129	NA	FALSE	FALSE	FALSE	NA	NA	NA	NA	NA	NA	NA	NA	FALSE	TRUE	TRUE	NA	TRUE
36793816	Eaf2	chr16	-	36792884	36828227	3.6794e+07	18.8961	0.019879	36793957	36794070	113	Eaf2:chr16:36793957-36794070:-	Eaf2:1	36793516	36793816	67,23,67,23	4	36793516	36794116	NA	NA	NA	NA	NA	NA	NA	NA	NA	46	NA	112188	NA	FALSE	NA	NA	NA	NA	NA	NA	NA	NA	NA	FALSE	NA	TRUE	TRUE	NA	TRUE
36800595	Eaf2	chr16	-	36792884	36828227	3.68006e+07	22.377	1	36800540	36800675	135	Eaf2:chr16:36800540-36800675:-	Eaf2:2	36800295	36800595	8	1	36800295	36800895	78142	NA	NA	NA	NA	NA	32,71	NA	NA	NA	NA	NA	NA	FALSE	TRUE	NA	NA	NA	NA	NA	FALSE	NA	NA	NA	NA	NA	TRUE	NA	TRUE
34946127	Eci3	chr13	-	34945744	34963810	3.49461e+07	29.7011	0.377868	34946031	34946209	178	Eci3:chr13:34946031-34946209:-	Eci3:1	34945827	34946127		NA	34945827	34946427	NA	NA	NA	NA	NA	NA	85	152	NA	10,14,18,122	NA	NA	27,28,29,30,31,32,33,34,35,36,37,38,39,40,41,42,43,44,45	FALSE	NA	NA	NA	NA	NA	NA	FALSE	TRUE	NA	TRUE	NA	NA	TRUE	FALSE	TRUE
58830830	Ecpas	chr4	-	58797146	58912749	5.88309e+07	148.743	0.147899	58830423	58831316	893	Ecpas:chr4:58830423-58831316:-	Ecpas:9	58830530	58830830	276	1	58830530	58831130	NA	NA	NA	NA	139	NA	NA	NA	NA	282289296	NA	NA	278285	FALSE	NA	NA	NA	NA	TRUE	NA	NA	NA	NA	FALSE	NA	NA	TRUE	FALSE	TRUE
89322167	Edil3	chr13	+	88821472	89323225	8.9322e+07	24.6905	0.00403707	89321878	89322026	148	Edil3:chr13:89321878-89322026:+	Edil3:52	89322167	89322467	261	1	89321867	89322467	3	NA	NA	NA	NA	NA	NA	NA	166	NA	NA	NA	NA	FALSE	FALSE	NA	NA	NA	NA	NA	NA	NA	TRUE	NA	NA	NA	TRUE	NA	TRUE
89322221	Edil3	chr13	+	88821472	89323225	8.93223e+07	105.687	0.466506	89321988	89322622	634	Edil3:chr13:89321988-89322622:+	Edil3:52	89322221	89322521	207280	2	89321921	89322521	NA	NA	NA	NA	NA	NA	NA	NA	112	NA	NA	NA	NA	FALSE	NA	NA	NA	NA	NA	NA	NA	NA	TRUE	NA	NA	NA	TRUE	NA	TRUE
174782389	Edn3	chr2	+	174760619	174784042	1.74782e+08	78.1391	0.631267	174782119	174782588	469	Edn3:chr2:174782119-174782588:+	Edn3:1	174782389	174782689	236	1	174782089	174782689	NA	NA	NA	NA	NA	NA	NA	NA	NA	209	168	NA	NA	FALSE	NA	NA	NA	NA	NA	NA	NA	NA	NA	FALSE	TRUE	NA	TRUE	NA	TRUE
96045567	Eea1	chr10	+	95940750	96047229	9.60456e+07	46.0154	0.344017	96045422	96045698	276	Eea1:chr10:96045422-96045698:+	Eea1:19	96045567	96045867	219	1	96045267	96045867	11261	NA	NA	NA	201	NA	188	178	NA	NA	194	182	NA	FALSE	FALSE	NA	NA	NA	FALSE	NA	FALSE	TRUE	NA	NA	FALSE	FALSE	TRUE	NA	TRUE
120905684	Eef2k	chr7	+	120842831	120907450	1.20906e+08	83.341	0.553322	120905476	120905976	500	Eef2k:chr7:120905476-120905976:+	Eef2k:7	120905684	120905984		NA	120905384	120905984	NA	NA	NA	280293	NA	NA	NA	NA	NA	286	107	NA	NA	FALSE	NA	NA	NA	FALSE	NA	NA	NA	NA	NA	FALSE	TRUE	NA	TRUE	NA	TRUE
5245260	Eef2kmt	chr16	-	5244115	5255983	5.24527e+06	58.7907	0.820125	5245092	5245445	353	Eef2kmt:chr16:5245092-5245445:-	Eef2kmt:2	5244960	5245260	25	1	5244960	5245560	NA	NA	NA	NA	NA	NA	NA	NA	NA	NA	174194	NA	NA	FALSE	NA	NA	NA	NA	NA	NA	NA	NA	NA	NA	TRUE	NA	TRUE	NA	TRUE
115775667	Efcab14	chr4	+	115737744	115777393	1.15776e+08	114.69	0.736985	115775328	115776017	689	Efcab14:chr4:115775328-115776017:+	Efcab14:16	115775667	115775967	92,227,238,279,92,227,238,279	8	115775367	115775967	12	NA	NA	257	NA	NA	139	NA	NA	203217	NA	NA	NA	FALSE	FALSE	NA	NA	FALSE	NA	NA	TRUE	NA	NA	FALSE	NA	NA	TRUE	NA	TRUE
87757380	Efcc1	chr6	+	87730893	87758985	8.77572e+07	24.0584	0.0538723	87757136	87757281	145	Efcc1:chr6:87757136-87757281:+	Efcc1:2	87757380	87757680		NA	87757080	87757680	NA	173	NA	NA	NA	NA	NA	NA	NA	286	112199	116257	NA	FALSE	NA	TRUE	NA	NA	NA	NA	NA	NA	NA	FALSE	TRUE	TRUE	TRUE	NA	TRUE
87757431	Efcc1	chr6	+	87730893	87758985	8.77574e+07	88.7276	0.946128	87757174	87757706	532	Efcc1:chr6:87757174-87757706:+	Efcc1:2	87757431	87757731	254	1	87757131	87757731	NA	122	NA	NA	NA	NA	NA	NA	NA	235	61148	65206	NA	FALSE	NA	TRUE	NA	NA	NA	NA	NA	NA	NA	FALSE	TRUE	FALSE	TRUE	NA	TRUE
120091076	Ehd4	chr2	-	120089174	120154606	1.20091e+08	66.7672	0.91407	120090883	120091284	401	Ehd4:chr2:120090883-120091284:-	Ehd4:2	120090776	120091076	95,28	2	120090776	120091376	NA	NA	NA	NA	NA	NA	NA	NA	NA	NA	164	NA	NA	FALSE	NA	NA	NA	NA	NA	NA	NA	NA	NA	NA	TRUE	NA	TRUE	NA	TRUE
28270073	Eid2	chr7	+	28267881	28272373	2.82701e+07	148.878	0.392251	28269642	28270535	893	Eid2:chr7:28269642-28270535:+	Eid2:2	28270073	28270373		NA	28269773	28270373	NA	NA	NA	NA	NA	NA	NA	94	NA	266	NA	270	2.7928e+29	FALSE	NA	NA	NA	NA	NA	NA	NA	TRUE	NA	FALSE	NA	FALSE	TRUE	FALSE	TRUE
28278172	Eid2b	chr7	+	28277739	28283204	2.82782e+07	71.7047	0.238262	28277960	28278391	431	Eid2b:chr7:28277960-28278391:+	Eid2b:1	28278172	28278472	216248290	3	28277872	28278472	178	NA	NA	NA	NA	NA	NA	NA	NA	184191197	NA	NA	NA	FALSE	TRUE	NA	NA	NA	NA	NA	NA	NA	NA	FALSE	NA	NA	TRUE	NA	TRUE
46608659	Eif1a	chr18	+	46597704	46618341	4.66087e+07	95.3962	0.110761	46608378	46608950	572	Eif1a:chr18:46608378-46608950:+	Eif1a:4	46608659	46608959	50,50	2	46608359	46608959	42,71	NA	NA	15277	94	NA	NA	199	136	NA	NA	255	NA	FALSE	FALSE	NA	NA	FALSE	TRUE	NA	NA	FALSE	TRUE	NA	NA	FALSE	TRUE	NA	TRUE
46609400	Eif1a	chr18	+	46597704	46618341	4.66094e+07	55.2826	0.049021	46609227	46609559	332	Eif1a:chr18:46609227-46609559:+	Eif1a:4	46609400	46609700		NA	46609100	46609700	18	274	NA	NA	NA	NA	NA	NA	141	NA	171175179189	NA	NA	FALSE	FALSE	FALSE	NA	NA	NA	NA	NA	NA	TRUE	NA	TRUE	NA	TRUE	NA	TRUE
143904001	Eif2ak1	chr5	+	143817788	143904252	1.43904e+08	90.9192	0.333346	143903726	143904252	526	Eif2ak1:chr5:143903726-143904252:+	Eif2ak1:14	143904001	143904252	251	1	143903701	143904301	NA	NA	NA	18	NA	NA	NA	174212	NA	216	61	NA	NA	FALSE	NA	NA	NA	FALSE	NA	NA	NA	TRUE	NA	FALSE	FALSE	NA	TRUE	NA	TRUE
78854833	Eif2ak2	chr17	-	78852534	78882573	78854833	83.974	0.418217	78854581	78855084	503	Eif2ak2:chr17:78854581-78855084:-	Eif2ak2:2	78854533	78854833	278	1	78854533	78855133	NA	NA	NA	22	NA	NA	NA	NA	NA	NA	176	NA	NA	FALSE	NA	NA	NA	FALSE	NA	NA	NA	NA	NA	NA	TRUE	NA	TRUE	NA	TRUE
122052156	Eif3j1	chr2	+	122028546	122056743	122052156	66.809	0.110982	122051955	122052356	401	Eif3j1:chr2:122051955-122052356:+	Eif3j1:5	122052156	122052456		NA	122051856	122052456	166	NA	NA	NA	NA	NA	154229	NA	NA	NA	NA	172177240	NA	FALSE	TRUE	NA	NA	NA	NA	NA	TRUE	NA	NA	NA	NA	TRUE	TRUE	NA	TRUE
122052698	Eif3j1	chr2	+	122028546	122056743	122052698	47.9112	0.164876	122052554	122052841	287	Eif3j1:chr2:122052554-122052841:+	Eif3j1:5	122052698	122052998		NA	122052398	122052998	NA	201284	NA	NA	NA	NA	NA	NA	NA	NA	NA	140	NA	FALSE	NA	FALSE	NA	NA	NA	NA	NA	NA	NA	NA	NA	TRUE	TRUE	NA	TRUE
43476892	Eif3j2	chr18	-	43475418	43477796	43476892	44.712	0.0306282	43476757	43477026	269	Eif3j2:chr18:43476757-43477026:-	Eif3j2:1	43476592	43476892	264	1	43476592	43477192	161	NA	NA	NA	NA	NA	149224	NA	NA	NA	NA	167172235	253	FALSE	TRUE	NA	NA	NA	NA	NA	TRUE	NA	NA	NA	NA	TRUE	TRUE	FALSE	TRUE
111545530	Eif5	chr12	+	111538016	111547927	1.11546e+08	66.3977	0.256473	111545325	111545724	399	Eif5:chr12:111545325-111545724:+	Eif5:5	111545530	111545830		NA	111545230	111545830	162	NA	NA	NA	NA	NA	NA	NA	245	NA	NA	NA	NA	FALSE	TRUE	NA	NA	NA	NA	NA	NA	NA	FALSE	NA	NA	NA	TRUE	NA	TRUE
38052058	Eif5b	chr1	+	37998010	38055579	3.80519e+07	143.816	0.268278	38051438	38052301	863	Eif5b:chr1:38051438-38052301:+	Eif5b:13	38052058	38052358	14,26,210,243	4	38051758	38052358	NA	NA	NA	NA	NA	NA	NA	NA	NA	188	9	177	NA	FALSE	NA	NA	NA	NA	NA	NA	NA	NA	NA	FALSE	FALSE	TRUE	TRUE	NA	TRUE
73737848	Elac1	chr18	-	73735038	73754479	7.37378e+07	92.3354	0.398638	73737497	73738051	554	Elac1:chr18:73737497-73738051:-	Elac1:1	73737548	73737848		NA	73737548	73738148	177	NA	NA	NA	NA	NA	NA	NA	NA	296	147	NA	NA	FALSE	TRUE	NA	NA	NA	NA	NA	NA	NA	NA	FALSE	TRUE	NA	TRUE	NA	TRUE
91252396	Elavl2	chr4	-	91250689	91372034	9.12524e+07	69.0485	0.0871566	91252200	91252614	414	Elavl2:chr4:91252200-91252614:-	Elavl2:1	91252096	91252396	242	1	91252096	91252696	201	NA	NA	NA	NA	NA	NA	NA	178	157	195241	153	NA	FALSE	FALSE	NA	NA	NA	NA	NA	NA	NA	TRUE	TRUE	FALSE	TRUE	TRUE	NA	TRUE
91252712	Elavl2	chr4	-	91250689	91372034	9.12527e+07	101.527	0.0468403	91252406	91253015	609	Elavl2:chr4:91252406-91253015:-	Elavl2:1	91252412	91252712		NA	91252412	91253012	148268	65169	NA	NA	NA	NA	NA	NA	NA	NA	176	210	NA	FALSE	TRUE	TRUE	NA	NA	NA	NA	NA	NA	NA	NA	TRUE	FALSE	TRUE	NA	TRUE
51266783	Elf2	chr3	-	51252702	51340663	5.12668e+07	36.2738	1	51266691	51266909	218	Elf2:chr3:51266691-51266909:-	Elf2:3	51266483	51266783		NA	51266483	51267083	121	NA	NA	NA	234	NA	NA	85	NA	NA	238	NA	NA	FALSE	TRUE	NA	NA	NA	FALSE	NA	NA	FALSE	NA	NA	FALSE	NA	TRUE	NA	TRUE
72567461	Elmod3	chr6	-	72565921	72598395	7.25675e+07	39.6573	1	72567349	72567587	238	Elmod3:chr6:72567349-72567587:-	Elmod3:2	72567161	72567461	211	1	72567161	72567761	140	105129	NA	NA	NA	NA	NA	NA	NA	1.10114e+29	NA	80,84,88,92	NA	FALSE	TRUE	TRUE	NA	NA	NA	NA	NA	NA	NA	TRUE	NA	TRUE	TRUE	NA	TRUE
129633346	Elovl6	chr3	+	129532367	129638495	1.29633e+08	65.882	1	129633149	129633544	395	Elovl6:chr3:129633149-129633544:+	Elovl6:7	129633346	129633646	209297209297	4	129633046	129633646	NA	NA	NA	NA	NA	NA	NA	NA	NA	NA	122202	241246	NA	FALSE	NA	NA	NA	NA	NA	NA	NA	NA	NA	NA	TRUE	FALSE	TRUE	NA	TRUE
97246679	Enc1	chr13	+	97241105	97253040	9.72467e+07	62.8483	1	97246484	97246861	377	Enc1:chr13:97246484-97246861:+	Enc1:1	97246679	97246979	105	1	97246379	97246979	NA	NA	NA	NA	NA	NA	NA	NA	NA	NA	90	NA	NA	FALSE	NA	NA	NA	NA	NA	NA	NA	NA	NA	NA	TRUE	NA	TRUE	NA	TRUE
44099237	Enpp4	chr17	-	44096207	44105809	4.40992e+07	56.7438	1	44099069	44099409	340	Enpp4:chr17:44099069-44099409:-	Enpp4:2	44098937	44099237	8	1	44098937	44099537	NA	NA	NA	NA	NA	NA	NA	NA	NA	NA	NA	179184189197202	NA	FALSE	NA	NA	NA	NA	NA	NA	NA	NA	NA	NA	NA	TRUE	TRUE	NA	TRUE
69366502	Entpd4	chr14	+	69337174	69367270	6.93665e+07	73.3047	1	69366282	69366722	440	Entpd4:chr14:69366282-69366722:+	Entpd4:8	69366502	69366802		NA	69366202	69366802	153198	NA	NA	NA	NA	NA	NA	NA	NA	165	161	NA	NA	FALSE	TRUE	NA	NA	NA	NA	NA	NA	NA	NA	TRUE	TRUE	NA	TRUE	NA	TRUE
84376784	Entpd5	chr12	-	84373857	84405476	8.43765e+07	19.3539	0.0178629	84376452	84376569	117	Entpd5:chr12:84376452-84376569:-	Entpd5:1	84376484	84376784	107	1	84376484	84377084	99	NA	NA	NA	NA	NA	NA	NA	NA	NA	NA	NA	NA	FALSE	TRUE	NA	NA	NA	NA	NA	NA	NA	NA	NA	NA	NA	TRUE	NA	TRUE
33796595	Epb41l4a	chr18	-	33796322	34006919	3.37968e+07	19.5725	0.00756728	33796716	33796834	118	Epb41l4a:chr18:33796716-33796834:-	Epb41l4a:1	33796322	33796595	267	1	33796295	33796895	NA	NA	NA	NA	NA	NA	91	NA	NA	252	NA	NA	NA	FALSE	NA	NA	NA	NA	NA	NA	TRUE	NA	NA	FALSE	NA	NA	TRUE	NA	TRUE
119548440	Epb41l5	chr1	-	119545033	119649000	1.19548e+08	92.2462	0.553709	119548129	119548683	554	Epb41l5:chr1:119548129-119548683:-	Epb41l5:2	119548140	119548440		NA	119548140	119548740	269	NA	NA	NA	NA	NA	NA	234	NA	NA	167	230	NA	FALSE	FALSE	NA	NA	NA	NA	NA	NA	FALSE	NA	NA	TRUE	FALSE	TRUE	NA	TRUE
84054615	Epha5	chr5	-	84049717	84416921	8.40546e+07	81.2915	0.185084	84054364	84054852	488	Epha5:chr5:84054364-84054852:-	Epha5:2	84054315	84054615		NA	84054315	84054915	NA	NA	NA	13180	NA	188	NA	NA	30	192	NA	130149153157161	NA	FALSE	NA	NA	NA	TRUE	NA	FALSE	NA	NA	FALSE	FALSE	NA	TRUE	TRUE	NA	TRUE
84065861	Epha5	chr5	-	84049717	84416921	8.40658e+07	133.086	0.3571	84065354	84066153	799	Epha5:chr5:84065354-84066153:-	Epha5:4	84065561	84065861		NA	84065561	84066161	150185	NA	NA	10	246269	NA	72163	NA	NA	NA	NA	NA	NA	FALSE	TRUE	NA	NA	FALSE	FALSE	NA	TRUE	NA	NA	NA	NA	NA	TRUE	NA	TRUE
84066653	Epha5	chr5	-	84049717	84416921	8.40664e+07	32.8639	0.00956442	84066324	84066521	197	Epha5:chr5:84066324-84066521:-	Epha5:5	84066353	84066653		NA	84066353	84066953	163	NA	NA	NA	NA	NA	NA	NA	NA	167	NA	NA	NA	FALSE	TRUE	NA	NA	NA	NA	NA	NA	NA	NA	TRUE	NA	NA	TRUE	NA	TRUE
84067098	Epha5	chr5	-	84049717	84416921	8.40671e+07	85.1656	0.451331	84066855	84067366	511	Epha5:chr5:84066855-84067366:-	Epha5:5	84066798	84067098		NA	84066798	84067398	134	73	NA	NA	139	174	NA	NA	71	NA	1.45152e+38	78122158162	NA	FALSE	TRUE	FALSE	NA	NA	TRUE	TRUE	NA	NA	FALSE	NA	TRUE	TRUE	TRUE	NA	TRUE
28946290	Epha7	chr4	+	28813131	28967506	28946290	41.5559	0.0849129	28946165	28946414	249	Epha7:chr4:28946165-28946414:+	Epha7:19	28946290	28946590	44236	2	28945990	28946590	92	153	NA	NA	NA	NA	NA	NA	149265	22220	NA	NA	NA	FALSE	TRUE	TRUE	NA	NA	NA	NA	NA	NA	TRUE	FALSE	NA	NA	TRUE	NA	TRUE
28964017	Epha7	chr4	+	28813131	28967506	2.8964e+07	34.9804	0.0141402	28963888	28964097	209	Epha7:chr4:28963888-28964097:+	Epha7:21	28964017	28964317	236	1	28963717	28964317	283	NA	NA	295	NA	NA	NA	NA	153	210	98	214	NA	FALSE	FALSE	NA	NA	FALSE	NA	NA	NA	NA	TRUE	FALSE	TRUE	FALSE	TRUE	NA	TRUE
101922812	Ephb1	chr9	-	101922128	102354693	1.01922e+08	98.7653	0.0430811	101922128	101922717	589	Ephb1:chr9:101922128-101922717:-	Ephb1:1	101922512	101922812	241	1	101922512	101923112	NA	83	NA	NA	NA	NA	NA	239	NA	NA	9120244	NA	1,2	FALSE	NA	FALSE	NA	NA	NA	NA	NA	FALSE	NA	NA	TRUE	NA	TRUE	FALSE	TRUE
119773756	Erc1	chr6	-	119570789	119848150	119773756	16.8089	0.207297	119773705	119773806	101	Erc1:chr6:119773705-119773806:-	Erc1:25	119773456	119773756		NA	119773456	119774056	214	NA	NA	NA	148	NA	NA	NA	247	120	NA	NA	NA	FALSE	FALSE	NA	NA	NA	TRUE	NA	NA	NA	FALSE	TRUE	NA	NA	TRUE	NA	TRUE
28478161	Erc2	chr14	+	27622428	28478546	2.84782e+07	89.6368	0.397483	28477903	28478441	538	Erc2:chr14:28477903-28478441:+	Erc2:61	28478161	28478461	211211	2	28477861	28478461	173	NA	NA	NA	NA	NA	NA	NA	NA	179183187	NA	NA	NA	FALSE	TRUE	NA	NA	NA	NA	NA	NA	NA	NA	TRUE	NA	NA	TRUE	NA	TRUE
148181596	Ergic2	chr6	-	148176746	148212374	148181596	163.565	0.0887882	148181105	148182086	981	Ergic2:chr6:148181105-148182086:-	Ergic2:2	148181296	148181596	288,268,231,67,22	5	148181296	148181896	32240287	NA	258	NA	NA	NA	NA	NA	NA	NA	5,39,113,244	63	35,36	FALSE	FALSE	NA	FALSE	NA	NA	NA	NA	NA	NA	NA	TRUE	FALSE	TRUE	FALSE	TRUE
27038838	Erlin2	chr8	+	27023799	27040499	2.70389e+07	126.268	0.0950138	27038507	27039264	757	Erlin2:chr8:27038507-27039264:+	Erlin2:5	27038838	27039138	47220265296	4	27038538	27039138	NA	109279	NA	NA	NA	NA	40	83	NA	NA	NA	NA	NA	FALSE	NA	TRUE	NA	NA	NA	NA	FALSE	FALSE	NA	NA	NA	NA	TRUE	NA	TRUE
12609291	Ero1b	chr13	+	12565874	12611396	1.26093e+07	69.6523	0.485312	12609051	12609469	418	Ero1b:chr13:12609051-12609469:+	Ero1b:3	12609291	12609591	55237	2	12608991	12609591	127	NA	NA	106	217	NA	NA	NA	NA	NA	NA	NA	NA	FALSE	TRUE	NA	NA	TRUE	FALSE	NA	NA	NA	NA	NA	NA	NA	TRUE	NA	TRUE
10566968	Esco1	chr18	-	10562181	10610352	1.05672e+07	51.091	0.00658752	10567047	10567353	306	Esco1:chr18:10567047-10567353:-	Esco1:1	10566668	10566968		NA	10566668	10567268	262	NA	NA	101	NA	NA	143	NA	NA	NA	NA	NA	NA	FALSE	FALSE	NA	NA	TRUE	NA	NA	TRUE	NA	NA	NA	NA	NA	TRUE	NA	TRUE
116373765	Esyt2	chr12	+	116281196	116391050	1.16374e+08	27.0772	1	116373687	116373849	162	Esyt2:chr12:116373687-116373849:+	Esyt2:13	116373765	116374065		NA	116373465	116374065	NA	NA	NA	NA	148	NA	NA	NA	NA	NA	NA	NA	NA	FALSE	NA	NA	NA	NA	TRUE	NA	NA	NA	NA	NA	NA	NA	TRUE	NA	TRUE
34905021	Etf1	chr18	-	34902396	34932007	3.4905e+07	39.746	0.053705	34904886	34905124	238	Etf1:chr18:34904886-34905124:-	Etf1:2	34904721	34905021	251204	2	34904721	34905321	275	NA	NA	NA	NA	NA	NA	NA	NA	NA	174	185	NA	FALSE	FALSE	NA	NA	NA	NA	NA	NA	NA	NA	NA	TRUE	FALSE	TRUE	NA	TRUE
20810132	Etl4	chr2	+	19909780	20810713	2.08103e+07	99.6878	0.228186	20810021	20810620	599	Etl4:chr2:20810021-20810620:+	Etl4:52	20810132	20810432	71,221,71,221	4	20809832	20810432	93	NA	NA	NA	NA	NA	197	NA	NA	201	NA	NA	NA	FALSE	TRUE	NA	NA	NA	NA	NA	FALSE	NA	NA	FALSE	NA	NA	TRUE	NA	TRUE
143204327	Etnk1	chr6	+	143167221	143234463	1.43204e+08	103.724	0.099849	143203993	143204616	623	Etnk1:chr6:143203993-143204616:+	Etnk1:8	143204327	143204627	29,93	2	143204027	143204627	NA	NA	NA	NA	NA	NA	NA	NA	NA	NA	290	168	NA	FALSE	NA	NA	NA	NA	NA	NA	NA	NA	NA	NA	FALSE	TRUE	TRUE	NA	TRUE
143206211	Etnk1	chr6	+	143167221	143234463	1.43206e+08	130.12	0.554397	143205932	143206712	780	Etnk1:chr6:143205932-143206712:+	Etnk1:9	143206211	143206511	201	1	143205911	143206511	NA	NA	NA	NA	NA	NA	165175	NA	181	NA	NA	NA	NA	FALSE	NA	NA	NA	NA	NA	NA	TRUE	NA	FALSE	NA	NA	NA	TRUE	NA	TRUE
4194948	Evi5l	chr8	+	4166567	4210281	4.19494e+06	58.1131	0.486384	4194761	4195110	349	Evi5l:chr8:4194761-4195110:+	Evi5l:11	4194948	4195248		NA	4194648	4195248	NA	NA	NA	NA	NA	NA	NA	NA	NA	110114118122	NA	127131135139143	NA	FALSE	NA	NA	NA	NA	NA	NA	NA	NA	NA	TRUE	NA	TRUE	TRUE	NA	TRUE
37682953	Exoc6	chr19	+	37520879	37684120	3.7683e+07	80.7708	0.735991	37682799	37683283	484	Exoc6:chr19:37682799-37683283:+	Exoc6:13	37682953	37683253	95285	2	37682653	37683253	172	198	NA	NA	NA	NA	NA	NA	204248	261	230	NA	NA	FALSE	TRUE	FALSE	NA	NA	NA	NA	NA	NA	FALSE	FALSE	FALSE	NA	TRUE	NA	TRUE
84619221	Exoc6b	chr6	-	84614475	85069513	8.46192e+07	113.889	0.064148	84618824	84619507	683	Exoc6b:chr6:84618824-84619507:-	Exoc6b:1	84618921	84619221		NA	84618921	84619521	NA	NA	NA	NA	NA	NA	NA	NA	NA	NA	NA	177182187267	NA	FALSE	NA	NA	NA	NA	NA	NA	NA	NA	NA	NA	NA	TRUE	TRUE	NA	TRUE
119463700	Exog	chr9	+	119444943	119467912	1.19464e+08	124.598	0.434016	119463280	119464028	748	Exog:chr9:119463280-119464028:+	Exog:4	119463700	119464000	60	1	119463400	119464000	NA	NA	NA	NA	NA	NA	NA	NA	NA	37	91	NA	NA	FALSE	NA	NA	NA	NA	NA	NA	NA	NA	NA	FALSE	TRUE	NA	TRUE	NA	TRUE
23103823	Eya4	chr10	-	23102950	23349903	2.31038e+07	50.0922	1	23103669	23103969	300	Eya4:chr10:23103669-23103969:-	Eya4:2	23103523	23103823		NA	23103523	23104123	NA	244	NA	NA	NA	NA	NA	NA	NA	158165169174180	NA	NA	NA	FALSE	NA	FALSE	NA	NA	NA	NA	NA	NA	NA	TRUE	NA	NA	TRUE	NA	TRUE
101191395	Ezh1	chr11	-	101191106	101226463	1.01191e+08	117.049	0.112471	101191106	101191781	675	Ezh1:chr11:101191106-101191781:-	Ezh1:1	101191106	101191395	279234	2	101191095	101191695	230	NA	157	NA	NA	214	NA	NA	NA	262	NA	NA	NA	FALSE	FALSE	NA	TRUE	NA	NA	FALSE	NA	NA	NA	FALSE	NA	NA	TRUE	NA	TRUE
171463946	F11r	chr1	+	171437535	171465396	1.71464e+08	27.6601	0.197341	171463859	171464025	166	F11r:chr1:171463859-171464025:+	F11r:1	171463946	171464246	63	1	171463646	171464246	NA	115	NA	NA	NA	NA	NA	NA	NA	44	122	NA	NA	FALSE	NA	TRUE	NA	NA	NA	NA	NA	NA	NA	FALSE	TRUE	NA	TRUE	NA	TRUE
36867700	F13a1	chr13	-	36864007	37049288	3.68677e+07	76.5741	0.392199	36867478	36867938	460	F13a1:chr13:36867478-36867938:-	F13a1:1	36867400	36867700		NA	36867400	36868000	125	NA	NA	NA	NA	NA	NA	NA	NA	NA	164182	176	NA	FALSE	TRUE	NA	NA	NA	NA	NA	NA	NA	NA	NA	TRUE	TRUE	TRUE	NA	TRUE
54660998	Faf2	chr13	+	54621784	54665569	5.4661e+07	40.3221	0.353533	54660895	54661137	242	Faf2:chr13:54660895-54661137:+	Faf2:13	54660998	54661298	207245284	3	54660698	54661298	244	NA	208	NA	NA	NA	NA	NA	NA	NA	176	188	NA	FALSE	FALSE	NA	FALSE	NA	NA	NA	NA	NA	NA	NA	TRUE	FALSE	TRUE	NA	TRUE
65044153	Fam114a1	chr5	+	64970071	65045660	6.50442e+07	28.6371	0.510477	65044094	65044265	171	Fam114a1:chr5:65044094-65044265:+	Fam114a1:5	65044153	65044453		NA	65043853	65044453	NA	NA	NA	NA	NA	NA	NA	NA	NA	NA	89,93,97,101,161,165,169,173,177,181,185,189,199,203,207,213,217,221,225,229,235,239,243,247	NA	NA	FALSE	NA	NA	NA	NA	NA	NA	NA	NA	NA	NA	TRUE	NA	TRUE	NA	TRUE
65044204	Fam114a1	chr5	+	64970071	65045660	6.50442e+07	88.4521	0.489523	65043900	65044431	531	Fam114a1:chr5:65043900-65044431:+	Fam114a1:5	65044204	65044504		NA	65043904	65044504	NA	NA	NA	NA	NA	NA	NA	NA	NA	NA	38,42,46,50,110,114,118,122,126,130,134,138,148,152,156,162,166,170,174,178,184,188,192,196,281	NA	NA	FALSE	NA	NA	NA	NA	NA	NA	NA	NA	NA	NA	TRUE	NA	TRUE	NA	TRUE
48880745	Fam120a	chr13	-	48879216	48968017	4.88808e+07	54.3815	1	48880587	48880913	326	Fam120a:chr13:48880587-48880913:-	Fam120a:2	48880445	48880745	70	1	48880445	48881045	227	98271	NA	NA	NA	NA	NA	181211	NA	158	176275	163280	NA	FALSE	FALSE	TRUE	NA	NA	NA	NA	NA	FALSE	NA	TRUE	TRUE	TRUE	TRUE	NA	TRUE
151473431	Fam120c	chrX	+	151344175	151474153	1.51474e+08	62.4365	0.526459	151473322	151473697	375	Fam120c:chrX:151473322-151473697:+	Fam120c:15	151473431	151473731		NA	151473131	151473731	NA	NA	NA	NA	272	104	NA	134	NA	NA	NA	284291	2.75276e+26	FALSE	NA	NA	NA	NA	FALSE	TRUE	NA	TRUE	NA	NA	NA	FALSE	TRUE	FALSE	TRUE
58526459	Fam126b	chr1	-	58522806	58586323	5.85264e+07	36.6107	0.484685	58526336	58526556	220	Fam126b:chr1:58526336-58526556:-	Fam126b:3	58526159	58526459	98	1	58526159	58526759	NA	NA	NA	NA	NA	80186	NA	NA	NA	NA	154	NA	NA	FALSE	NA	NA	NA	NA	NA	FALSE	NA	NA	NA	NA	TRUE	NA	TRUE	NA	TRUE
9207519	Fam155a	chr8	-	9205857	9771161	9.20746e+06	86.6987	0.329278	9207201	9207721	520	Fam155a:chr8:9207201-9207721:-	Fam155a:2	9207219	9207519	243243	2	9207219	9207819	96	NA	NA	NA	NA	NA	NA	NA	NA	293	NA	283	263	FALSE	TRUE	NA	NA	NA	NA	NA	NA	NA	NA	FALSE	NA	FALSE	TRUE	FALSE	TRUE
105371436	Fam160a2	chr7	-	105371211	105400054	1.05371e+08	22.9344	0.0505727	105371429	105371567	138	Fam160a2:chr7:105371429-105371567:-	Fam160a2:1	105371211	105371436	224	1	105371136	105371736	NA	NA	NA	NA	NA	NA	NA	NA	NA	206	2127	NA	NA	FALSE	NA	NA	NA	NA	NA	NA	NA	NA	NA	FALSE	TRUE	NA	TRUE	NA	TRUE
70583613	Fam160b2	chr14	-	70583294	70599835	7.05836e+07	53.1054	0.105637	70583425	70583743	318	Fam160b2:chr14:70583425-70583743:-	Fam160b2:1	70583313	70583613	284,72,62	3	70583313	70583913	NA	NA	NA	NA	NA	NA	NA	35,98	NA	NA	NA	NA	NA	FALSE	NA	NA	NA	NA	NA	NA	NA	TRUE	NA	NA	NA	NA	TRUE	NA	TRUE
100836228	Fam168a	chr7	+	100706702	100841656	1.00836e+08	90.8019	0.481719	100835994	100836538	544	Fam168a:chr7:100835994-100836538:+	Fam168a:13	100836228	100836528	259271	2	100835928	100836528	NA	NA	NA	NA	NA	NA	NA	NA	NA	NA	263267	166	NA	FALSE	NA	NA	NA	NA	NA	NA	NA	NA	NA	NA	FALSE	TRUE	TRUE	NA	TRUE
97126883	Fam169a	chr13	+	97067286	97131013	9.71269e+07	73.773	0.444969	97126669	97127111	442	Fam169a:chr13:97126669-97127111:+	Fam169a:5	97126883	97127183	253	1	97126583	97127183	207	NA	NA	NA	NA	NA	NA	156	NA	224	102136	NA	NA	FALSE	FALSE	NA	NA	NA	NA	NA	NA	TRUE	NA	FALSE	TRUE	NA	TRUE	NA	TRUE
3226993	Fam171a1	chr2	+	3118382	3227806	3.227e+06	112.425	0.105632	3226665	3227339	674	Fam171a1:chr2:3226665-3227339:+	Fam171a1:8	3226993	3227293	215259215259	4	3226693	3227293	104	NA	NA	NA	NA	NA	NA	NA	NA	235	NA	NA	NA	FALSE	TRUE	NA	NA	NA	NA	NA	NA	NA	NA	FALSE	NA	NA	TRUE	NA	TRUE
55138846	Fam177a	chr12	+	55124469	55142104	5.51389e+07	67.6371	0.157038	55138678	55139084	406	Fam177a:chr12:55138678-55139084:+	Fam177a:4	55138846	55139146		NA	55138546	55139146	227	150	NA	NA	NA	NA	NA	NA	NA	NA	NA	102	NA	FALSE	FALSE	TRUE	NA	NA	NA	NA	NA	NA	NA	NA	NA	TRUE	TRUE	NA	TRUE
55139432	Fam177a	chr12	+	55124469	55142104	5.51394e+07	72.2309	0.842962	55139194	55139627	433	Fam177a:chr12:55139194-55139627:+	Fam177a:4	55139432	55139732		NA	55139132	55139732	NA	98	NA	NA	NA	NA	NA	NA	NA	143	NA	NA	NA	FALSE	NA	TRUE	NA	NA	NA	NA	NA	NA	NA	TRUE	NA	NA	TRUE	NA	TRUE
55213909	Fam177a2	chr12	+	55199592	55217168	5.52139e+07	67.7695	0.157969	55213741	55214147	406	Fam177a2:chr12:55213741-55214147:+	Fam177a2:4	55213909	55214209		NA	55213609	55214209	228	151	NA	NA	NA	NA	NA	NA	NA	NA	NA	103	NA	FALSE	FALSE	TRUE	NA	NA	NA	NA	NA	NA	NA	NA	NA	TRUE	TRUE	NA	TRUE
55214495	Fam177a2	chr12	+	55199592	55217168	5.52145e+07	71.9823	0.842031	55214259	55214690	431	Fam177a2:chr12:55214259-55214690:+	Fam177a2:4	55214495	55214795		NA	55214195	55214795	NA	99	NA	NA	NA	NA	NA	NA	NA	144	NA	NA	NA	FALSE	NA	TRUE	NA	NA	NA	NA	NA	NA	NA	TRUE	NA	NA	TRUE	NA	TRUE
93081375	Fam181b	chr7	+	93079865	93081867	9.30815e+07	68.4595	0.63196	93081324	93081735	411	Fam181b:chr7:93081324-93081735:+	Fam181b:1	93081375	93081675	78	1	93081075	93081675	NA	NA	NA	NA	10170	NA	NA	NA	NA	63	NA	15,19,23,27,31,35,39,43	NA	FALSE	NA	NA	NA	NA	TRUE	NA	NA	NA	NA	FALSE	NA	FALSE	TRUE	NA	TRUE
53633366	Fam184a	chr10	-	53633034	53751123	5.36333e+07	68.3648	0.416237	53633109	53633519	410	Fam184a:chr10:53633109-53633519:-	Fam184a:1	53633066	53633366	238,218,13,0,238,218,13,0	8	53633066	53633666	34	192	NA	94	NA	NA	NA	NA	125	203	NA	NA	NA	FALSE	FALSE	FALSE	NA	TRUE	NA	NA	NA	NA	TRUE	FALSE	NA	NA	TRUE	NA	TRUE
42522579	Fam205a2	chr4	-	42522439	42528175	4.25226e+07	53.3061	1	42522439	42522750	311	Fam205a2:chr4:42522439-42522750:-	Fam205a2:1	42522439	42522579		NA	42522279	42522879	58	NA	NA	NA	NA	NA	NA	89	119	NA	NA	NA	NA	FALSE	FALSE	NA	NA	NA	NA	NA	NA	FALSE	TRUE	NA	NA	NA	TRUE	NA	TRUE
68260339	Fam210a	chr18	-	68260185	68300333	6.82603e+07	54.2941	1	68260185	68260501	316	Fam210a:chr18:68260185-68260501:-	Fam210a:1	68260185	68260339		NA	68260039	68260639	38	NA	NA	NA	NA	NA	NA	146	NA	135141	NA	NA	NA	FALSE	FALSE	NA	NA	NA	NA	NA	NA	TRUE	NA	TRUE	NA	NA	TRUE	NA	TRUE
68266654	Fam210a	chr18	-	68260185	68300333	6.82668e+07	69.221	0.0642131	68266616	68267031	415	Fam210a:chr18:68266616-68267031:-	Fam210a:2	68266354	68266654	218,205,99,47	4	68266354	68266954	NA	NA	NA	195	NA	NA	NA	165	NA	188	NA	132	NA	FALSE	NA	NA	NA	FALSE	NA	NA	NA	TRUE	NA	FALSE	NA	TRUE	TRUE	NA	TRUE
68268686	Fam210a	chr18	-	68260185	68300333	68268686	89.2357	0.0713287	68268418	68268953	535	Fam210a:chr18:68268418-68268953:-	Fam210a:3	68268386	68268686	257,101,40,17	4	68268386	68268986	NA	NA	NA	NA	NA	NA	NA	195	NA	NA	NA	97	NA	FALSE	NA	NA	NA	NA	NA	NA	NA	FALSE	NA	NA	NA	TRUE	TRUE	NA	TRUE
49388955	Fam221a	chr6	+	49367739	49392459	4.93889e+07	59.556	0.12744	49388758	49389115	357	Fam221a:chr6:49388758-49389115:+	Fam221a:1	49388955	49389255	18,51,61,83,260,18,51,61,83,260	10	49388655	49389255	112	NA	NA	NA	NA	244	NA	NA	NA	NA	NA	NA	NA	FALSE	TRUE	NA	NA	NA	NA	FALSE	NA	NA	NA	NA	NA	NA	TRUE	NA	TRUE
79611089	Fam227a	chr15	-	79609576	79658956	7.9611e+07	20.0409	0.0267436	79610967	79611087	120	Fam227a:chr15:79610967-79611087:-	Fam227a:1	79610789	79611089	98	1	79610789	79611389	109	NA	NA	NA	NA	NA	NA	NA	NA	74	NA	NA	NA	FALSE	TRUE	NA	NA	NA	NA	NA	NA	NA	NA	FALSE	NA	NA	TRUE	NA	TRUE
72224836	Fam32a	chr8	+	72219730	72225034	7.22248e+07	61.3675	0.592499	72224611	72224979	368	Fam32a:chr8:72224611-72224979:+	Fam32a:3	72224836	72225034		NA	72224536	72225136	NA	NA	NA	NA	174	NA	NA	NA	NA	NA	NA	NA	NA	FALSE	NA	NA	NA	NA	TRUE	NA	NA	NA	NA	NA	NA	NA	TRUE	NA	TRUE
72224895	Fam32a	chr8	+	72219730	72225034	7.22249e+07	33.8785	0.328117	72224793	72224996	203	Fam32a:chr8:72224793-72224996:+	Fam32a:3	72224895	72225034		NA	72224595	72225195	NA	NA	NA	NA	115	NA	NA	NA	NA	NA	NA	NA	NA	FALSE	NA	NA	NA	NA	TRUE	NA	NA	NA	NA	NA	NA	NA	TRUE	NA	TRUE
70088713	Fam81a	chr9	-	70088488	70141578	7.00887e+07	49.978	0.604415	70088550	70088850	300	Fam81a:chr9:70088550-70088850:-	Fam81a:1	70088488	70088713	217202	2	70088413	70089013	132	NA	NA	NA	NA	NA	NA	NA	NA	180189	NA	NA	NA	FALSE	TRUE	NA	NA	NA	NA	NA	NA	NA	NA	TRUE	NA	NA	TRUE	NA	TRUE
64343039	Fan1	chr7	-	64342132	64374080	6.4343e+07	48.0558	1	64342884	64343172	288	Fan1:chr7:64342884-64343172:-	Fan1:1	64342739	64343039		NA	64342739	64343339	109177	NA	215	NA	NA	NA	NA	266	271	NA	NA	NA	NA	FALSE	TRUE	NA	FALSE	NA	NA	NA	NA	FALSE	FALSE	NA	NA	NA	TRUE	NA	TRUE
113569055	Far1	chr7	+	113513834	113571772	1.13569e+08	38.1524	0.0206431	113568712	113568941	229	Far1:chr7:113568712-113568941:+	Far1:7	113569055	113569355	268	1	113568755	113569355	206	70235	NA	NA	241	NA	NA	212	NA	245	146	NA	NA	FALSE	FALSE	FALSE	NA	NA	FALSE	NA	NA	FALSE	NA	FALSE	TRUE	NA	TRUE	NA	TRUE
113569363	Far1	chr7	+	113513834	113571772	1.13569e+08	156.664	0.273082	113569014	113569954	940	Far1:chr7:113569014-113569954:+	Far1:7	113569363	113569663	270	1	113569063	113569663	85180	NA	NA	NA	239273	NA	NA	NA	NA	NA	234	NA	NA	FALSE	TRUE	NA	NA	NA	FALSE	NA	NA	NA	NA	NA	FALSE	NA	TRUE	NA	TRUE
93593017	Farp2	chr1	+	93512079	93621976	9.3593e+07	77.3641	0.158885	93592764	93593228	464	Farp2:chr1:93592764-93593228:+	Farp2:4	93593017	93593317	240278	2	93592717	93593317	141284	210	NA	NA	NA	NA	NA	NA	NA	254	NA	NA	NA	FALSE	TRUE	FALSE	NA	NA	NA	NA	NA	NA	NA	FALSE	NA	NA	TRUE	NA	TRUE
78425240	Farsb	chr1	-	78417955	78488859	7.84252e+07	57.2977	1	78425071	78425415	344	Farsb:chr1:78425071-78425415:-	Farsb:1	78424940	78425240	46	1	78424940	78425540	NA	NA	NA	NA	NA	NA	NA	NA	NA	133	NA	NA	NA	FALSE	NA	NA	NA	NA	NA	NA	NA	NA	NA	TRUE	NA	NA	TRUE	NA	TRUE
15914531	Fat3	chr9	-	15910183	16501285	1.59146e+07	65.05	0.929383	15914401	15914791	390	Fat3:chr9:15914401-15914791:-	Fat3:2	15914231	15914531	255,74	2	15914231	15914831	28	54	NA	NA	NA	NA	NA	NA	133	NA	NA	NA	NA	FALSE	FALSE	FALSE	NA	NA	NA	NA	NA	NA	TRUE	NA	NA	NA	TRUE	NA	TRUE
39011418	Fat4	chr3	+	38886940	39011991	3.90114e+07	106.018	0.128823	39011096	39011732	636	Fat4:chr3:39011096-39011732:+	Fat4:17	39011418	39011718		NA	39011118	39011718	153	285	NA	NA	NA	NA	NA	NA	NA	NA	170	201	NA	FALSE	TRUE	FALSE	NA	NA	NA	NA	NA	NA	NA	NA	TRUE	FALSE	TRUE	NA	TRUE
39011739	Fat4	chr3	+	38886940	39011991	3.90117e+07	53.933	0.226261	39011548	39011872	324	Fat4:chr3:39011548-39011872:+	Fat4:17	39011739	39011991	242	1	39011439	39012039	241	NA	NA	NA	228	NA	NA	NA	NA	NA	122	NA	NA	FALSE	FALSE	NA	NA	NA	FALSE	NA	NA	NA	NA	NA	TRUE	NA	TRUE	NA	TRUE
127492974	Fbrs	chr7	+	127485221	127494040	1.27493e+08	88.9305	1	127492711	127493244	533	Fbrs:chr7:127492711-127493244:+	Fbrs:3	127492974	127493274		NA	127492674	127493274	NA	NA	NA	NA	NA	NA	NA	NA	NA	2.22226e+23	NA	119	NA	FALSE	NA	NA	NA	NA	NA	NA	NA	NA	NA	FALSE	NA	TRUE	TRUE	NA	TRUE
110362822	Fbrsl1	chr5	-	110361752	110448503	1.10363e+08	156.51	0.200293	110362379	110363318	939	Fbrsl1:chr5:110362379-110363318:-	Fbrsl1:2	110362522	110362822	243,211,35,31	4	110362522	110363122	30	NA	NA	NA	222	NA	NA	NA	NA	NA	126	37	37	FALSE	FALSE	NA	NA	NA	FALSE	NA	NA	NA	NA	NA	TRUE	FALSE	TRUE	FALSE	TRUE
63054046	Fbxl17	chr17	-	63045948	63500017	6.3054e+07	44.588	1	63053906	63054173	267	Fbxl17:chr17:63053906-63054173:-	Fbxl17:4	63053746	63054046		NA	63053746	63054346	128	NA	NA	250	NA	NA	164	NA	NA	NA	174185191195199	178	NA	FALSE	TRUE	NA	NA	FALSE	NA	NA	TRUE	NA	NA	NA	TRUE	TRUE	TRUE	NA	TRUE
22433661	Fbxl4	chr4	+	22357543	22434100	2.24337e+07	67.0506	0.129104	22433501	22433903	402	Fbxl4:chr4:22433501-22433903:+	Fbxl4:5	22433661	22433961	239257	2	22433361	22433961	177	NA	NA	46	NA	211	NA	NA	NA	NA	NA	NA	NA	FALSE	TRUE	NA	NA	FALSE	NA	FALSE	NA	NA	NA	NA	NA	NA	TRUE	NA	TRUE
65303192	Fbxo16	chr14	+	65266618	65323973	6.53032e+07	24.9105	1	65303100	65303249	149	Fbxo16:chr14:65303100-65303249:+	Fbxo16:1	65303192	65303492	100	1	65302892	65303492	120	294	NA	NA	NA	NA	NA	NA	NA	NA	NA	NA	NA	FALSE	TRUE	FALSE	NA	NA	NA	NA	NA	NA	NA	NA	NA	NA	TRUE	NA	TRUE
47532360	Fbxo34	chr14	+	47472561	47532993	4.75324e+07	11.2798	0.0120773	47532320	47532388	68	Fbxo34:chr14:47532320-47532388:+	Fbxo34:9	47532360	47532660		NA	47532060	47532660	NA	NA	NA	NA	NA	NA	NA	NA	NA	NA	NA	116128134	NA	FALSE	NA	NA	NA	NA	NA	NA	NA	NA	NA	NA	NA	TRUE	TRUE	NA	TRUE
96283110	Fcgr1	chr3	-	96282904	96293969	9.62831e+07	31.7602	0.323224	96283012	96283203	191	Fcgr1:chr3:96283012-96283203:-	Fcgr1:1	96282904	96283110	205	1	96282810	96283410	NA	NA	NA	NA	180	NA	NA	NA	NA	187	NA	NA	NA	FALSE	NA	NA	NA	NA	TRUE	NA	NA	NA	NA	FALSE	NA	NA	TRUE	NA	TRUE
71704222	Fcho1	chr8	-	71703947	71721307	7.17042e+07	48.2195	0.769061	71704083	71704372	289	Fcho1:chr8:71704083-71704372:-	Fcho1:1	71703947	71704222		NA	71703922	71704522	100224	NA	NA	NA	NA	254	NA	NA	NA	NA	NA	246	NA	FALSE	TRUE	NA	NA	NA	NA	FALSE	NA	NA	NA	NA	NA	FALSE	TRUE	NA	TRUE
46495685	Fem1c	chr18	-	46492297	46525971	4.64957e+07	38.7155	0.965415	46495595	46495827	232	Fem1c:chr18:46495595-46495827:-	Fem1c:2	46495385	46495685		NA	46495385	46495985	107168187214	NA	NA	NA	206	NA	NA	NA	NA	NA	125289	49,53,57,113,119	NA	FALSE	TRUE	NA	NA	NA	FALSE	NA	NA	NA	NA	NA	TRUE	TRUE	TRUE	NA	TRUE
46495740	Fem1c	chr18	-	46492297	46525971	4.6496e+07	20.2052	0.034585	46495944	46496066	122	Fem1c:chr18:46495944-46496066:-	Fem1c:2	46495440	46495740		NA	46495440	46496040	162223242269	NA	NA	NA	261	NA	NA	NA	NA	NA	180	104108112168174	NA	FALSE	TRUE	NA	NA	NA	FALSE	NA	NA	NA	NA	NA	TRUE	TRUE	TRUE	NA	TRUE
64139232	Fer	chr17	+	63864015	64146525	6.41393e+07	27.5036	0.0203323	64139258	64139423	165	Fer:chr17:64139258-64139423:+	Fer:19	64139232	64139532	231266	2	64138932	64139532	NA	159241	NA	NA	NA	NA	NA	NA	245	NA	46	NA	NA	FALSE	NA	TRUE	NA	NA	NA	NA	NA	NA	FALSE	NA	FALSE	NA	TRUE	NA	TRUE
16435959	Fgd4	chr16	-	16416915	16560219	16435959	11.0493	0.052707	16435925	16435992	67	Fgd4:chr16:16435925-16435992:-	Fgd4:9	16435659	16435959	253	1	16435659	16436259	NA	NA	NA	NA	NA	NA	NA	NA	NA	71	235273	91,96,194	NA	FALSE	NA	NA	NA	NA	NA	NA	NA	NA	NA	FALSE	FALSE	TRUE	TRUE	NA	TRUE
16436010	Fgd4	chr16	-	16416915	16560219	16436010	28.6153	0.236977	16435924	16436095	171	Fgd4:chr16:16435924-16436095:-	Fgd4:9	16435710	16436010		NA	16435710	16436310	NA	NA	NA	NA	NA	NA	NA	NA	NA	122	286	142147245	NA	FALSE	NA	NA	NA	NA	NA	NA	NA	NA	NA	TRUE	FALSE	TRUE	TRUE	NA	TRUE
36918131	Fgfbp3	chr19	-	36917537	36919599	3.6918e+07	68.9079	0.0882671	36917835	36918249	414	Fgfbp3:chr19:36917835-36918249:-	Fgfbp3:1	36917831	36918131	251,83	2	36917831	36918431	NA	NA	NA	NA	57206	NA	NA	131	NA	227	NA	NA	NA	FALSE	NA	NA	NA	NA	FALSE	NA	NA	TRUE	NA	FALSE	NA	NA	TRUE	NA	TRUE
25133102	Fhod3	chr18	+	24709445	25137468	2.51332e+07	104.637	0.171438	25132875	25133502	627	Fhod3:chr18:25132875-25133502:+	Fhod3:29	25133102	25133402	90253288	3	25132802	25133402	NA	266	NA	NA	NA	NA	NA	NA	NA	NA	NA	175	NA	FALSE	NA	FALSE	NA	NA	NA	NA	NA	NA	NA	NA	NA	TRUE	TRUE	NA	TRUE
28437873	Fkbp5	chr17	-	28396559	28486149	2.84378e+07	45.6677	0.254249	28437665	28437939	274	Fkbp5:chr17:28437665-28437939:-	Fkbp5:6	28437573	28437873		NA	28437573	28438173	NA	NA	NA	NA	NA	255	NA	NA	110	NA	10	NA	1,2,3,257,258,259	FALSE	NA	NA	NA	NA	NA	FALSE	NA	NA	TRUE	NA	FALSE	NA	TRUE	FALSE	TRUE
53762682	Fktn	chr4	+	53713998	53765785	5.37627e+07	64.2454	0.200575	53762472	53762858	386	Fktn:chr4:53762472-53762858:+	Fktn:6	53762682	53762982	105276	2	53762382	53762982	NA	NA	NA	NA	NA	104	62	NA	NA	NA	117123	275	2.75276e+20	FALSE	NA	NA	NA	NA	NA	TRUE	FALSE	NA	NA	NA	TRUE	FALSE	TRUE	FALSE	TRUE
147637381	Flt1	chr5	-	147561604	147726011	1.47637e+08	50.2039	1	147637232	147637533	301	Flt1:chr5:147637232-147637533:-	Flt1:2	147637081	147637381	234	1	147637081	147637681	225	NA	NA	NA	NA	NA	NA	NA	NA	NA	1.47151e+41	18	NA	FALSE	FALSE	NA	NA	NA	NA	NA	NA	NA	NA	NA	TRUE	FALSE	TRUE	NA	TRUE
45130915	Flt3l	chr7	-	45129417	45136432	4.51309e+07	34.069	1	45130810	45131014	204	Flt3l:chr7:45130810-45131014:-	Flt3l:1	45130615	45130915		NA	45130615	45131215	93107	NA	NA	NA	NA	NA	NA	54	NA	NA	NA	43,64	NA	FALSE	TRUE	NA	NA	NA	NA	NA	NA	FALSE	NA	NA	NA	FALSE	TRUE	NA	TRUE
174821890	Fmn2	chr1	+	174501825	174822741	1.74822e+08	46.5057	0.744034	174821760	174822039	279	Fmn2:chr1:174821760-174822039:+	Fmn2:13	174821890	174822190		NA	174821590	174822190	NA	NA	NA	NA	NA	135231	NA	NA	NA	NA	121	NA	NA	FALSE	NA	NA	NA	NA	NA	TRUE	NA	NA	NA	NA	TRUE	NA	TRUE	NA	TRUE
122540425	Fnbp1l	chr3	-	122538719	122619715	1.2254e+08	59.023	1	122540249	122540604	355	Fnbp1l:chr3:122540249-122540604:-	Fnbp1l:2	122540125	122540425		NA	122540125	122540725	NA	NA	NA	NA	NA	NA	NA	NA	NA	NA	171177	NA	NA	FALSE	NA	NA	NA	NA	NA	NA	NA	NA	NA	NA	TRUE	NA	TRUE	NA	TRUE
27416465	Fndc3b	chr3	-	27416135	27710398	2.74165e+07	53.5989	0.267744	27416321	27416642	321	Fndc3b:chr3:27416321-27416642:-	Fndc3b:1	27416165	27416465	242	1	27416165	27416765	48	NA	NA	NA	180	NA	NA	NA	267	282	NA	NA	NA	FALSE	FALSE	NA	NA	NA	TRUE	NA	NA	NA	FALSE	FALSE	NA	NA	TRUE	NA	TRUE
85476500	Fos	chr12	+	85473890	85477570	8.54765e+07	92.4152	0.250965	85476211	85476766	555	Fos:chr12:85476211-85476766:+	Fos:1	85476500	85476800	260	1	85476200	85476800	NA	NA	NA	NA	NA	NA	NA	NA	NA	NA	NA	172177182187	NA	FALSE	NA	NA	NA	NA	NA	NA	NA	NA	NA	NA	NA	TRUE	TRUE	NA	TRUE
31810388	Foxc1	chr13	+	31806633	31812476	3.18101e+07	29.1936	0.105951	31810050	31810226	176	Foxc1:chr13:31810050-31810226:+	Foxc1:2	31810388	31810688	51250	2	31810088	31810688	NA	NA	124	NA	NA	NA	NA	NA	NA	28228	NA	NA	NA	FALSE	NA	NA	TRUE	NA	NA	NA	NA	NA	NA	FALSE	NA	NA	TRUE	NA	TRUE
99196178	Foxn3	chr12	-	99190063	99393797	9.91962e+07	91.6995	0.357406	99195929	99196479	550	Foxn3:chr12:99195929-99196479:-	Foxn3:4	99195878	99196178		NA	99195878	99196478	134	NA	NA	NA	NA	NA	NA	NA	NA	NA	NA	NA	222223	FALSE	TRUE	NA	NA	NA	NA	NA	NA	NA	NA	NA	NA	NA	TRUE	FALSE	TRUE
98925281	Foxp1	chr6	-	98922047	99266515	9.89253e+07	52.2022	0.156663	98925118	98925431	313	Foxp1:chr6:98925118-98925431:-	Foxp1:1	98924981	98925281		NA	98924981	98925581	NA	NA	150	NA	NA	NA	194	NA	NA	266	NA	NA	NA	FALSE	NA	NA	TRUE	NA	NA	NA	FALSE	NA	NA	FALSE	NA	NA	TRUE	NA	TRUE
31560295	Foxq1	chr13	+	31556134	31560976	3.15603e+07	50.2507	0.275091	31560134	31560435	301	Foxq1:chr13:31560134-31560435:+	Foxq1:1	31560295	31560595	15	1	31559995	31560595	NA	NA	NA	168	NA	NA	NA	NA	NA	NA	175181	NA	NA	FALSE	NA	NA	NA	TRUE	NA	NA	NA	NA	NA	NA	TRUE	NA	TRUE	NA	TRUE
74187760	Frmd3	chr4	+	74013442	74202214	7.41877e+07	56.5087	0.0543784	74187541	74187880	339	Frmd3:chr4:74187541-74187880:+	Frmd3:6	74187760	74188060		NA	74187460	74188060	NA	NA	NA	143	NA	NA	NA	148	NA	NA	NA	NA	NA	FALSE	NA	NA	NA	TRUE	NA	NA	NA	TRUE	NA	NA	NA	NA	TRUE	NA	TRUE
74188350	Frmd3	chr4	+	74013442	74202214	7.41883e+07	152.182	0.118509	74187890	74188803	913	Frmd3:chr4:74187890-74188803:+	Frmd3:6	74188350	74188650		NA	74188050	74188650	128	NA	NA	NA	233	197	NA	NA	NA	NA	NA	NA	NA	FALSE	TRUE	NA	NA	NA	FALSE	FALSE	NA	NA	NA	NA	NA	NA	TRUE	NA	TRUE
74188666	Frmd3	chr4	+	74013442	74202214	7.41888e+07	105.279	0.273533	74188469	74189101	632	Frmd3:chr4:74188469-74189101:+	Frmd3:6	74188666	74188966		NA	74188366	74188966	55	NA	NA	NA	65	83135	NA	NA	NA	NA	60	NA	NA	FALSE	FALSE	NA	NA	NA	FALSE	TRUE	NA	NA	NA	NA	FALSE	NA	TRUE	NA	TRUE
121548609	Frmd5	chr2	-	121544593	121807087	1.21548e+08	117.736	0.29951	121548120	121548826	706	Frmd5:chr2:121548120-121548826:-	Frmd5:3	121548309	121548609	269209	2	121548309	121548909	NA	NA	NA	NA	NA	NA	NA	NA	NA	281	110	NA	NA	FALSE	NA	NA	NA	NA	NA	NA	NA	NA	NA	FALSE	TRUE	NA	TRUE	NA	TRUE
53706667	Fsd1l	chr4	+	53631471	53707009	5.37066e+07	51.1374	0.036442	53706459	53706766	307	Fsd1l:chr4:53706459-53706766:+	Fsd1l:19	53706667	53706967	78292	2	53706367	53706967	99201	NA	NA	NA	NA	NA	NA	NA	NA	47	NA	NA	NA	FALSE	TRUE	NA	NA	NA	NA	NA	NA	NA	NA	FALSE	NA	NA	TRUE	NA	TRUE
114452562	Fst	chr13	-	114452262	114458951	1.14453e+08	109.887	0.20949	114452262	114452869	607	Fst:chr13:114452262-114452869:-	Fst:1	114452262	114452562	299268299268	4	114452262	114452862	185	175233	259	NA	NA	NA	77	NA	173189	278	NA	NA	274275276277278	FALSE	FALSE	TRUE	FALSE	NA	NA	NA	FALSE	NA	TRUE	FALSE	NA	NA	TRUE	FALSE	TRUE
76708292	Fstl5	chr3	+	76074270	76710019	7.67083e+07	102.725	0.385159	76708004	76708620	616	Fstl5:chr3:76708004-76708620:+	Fstl5:23	76708292	76708592		NA	76707992	76708592	114134143	NA	NA	NA	NA	NA	NA	122	NA	247	NA	NA	NA	FALSE	TRUE	NA	NA	NA	NA	NA	NA	TRUE	NA	FALSE	NA	NA	TRUE	NA	TRUE
9984676	Fth1	chr19	+	9982646	9985222	9.98465e+06	31.8206	0.0684086	9984549	9984740	191	Fth1:chr19:9984549-9984740:+	Fth1:1	9984676	9984976	67275	2	9984376	9984976	NA	NA	NA	NA	154	NA	NA	NA	NA	NA	NA	NA	NA	FALSE	NA	NA	NA	NA	TRUE	NA	NA	NA	NA	NA	NA	NA	TRUE	NA	TRUE
106249302	Ftsj3	chr11	-	106249138	106256079	106249302	61.5322	0.800953	106249138	106249486	348	Ftsj3:chr11:106249138-106249486:-	Ftsj3:1	106249138	106249302	78,16	2	106249002	106249602	NA	NA	152	NA	NA	NA	NA	NA	NA	144	NA	NA	NA	FALSE	NA	NA	TRUE	NA	NA	NA	NA	NA	NA	TRUE	NA	NA	TRUE	NA	TRUE
13515159	Fuca2	chr10	+	13501001	13519035	1.35153e+07	152.125	0.0987816	13514794	13515706	912	Fuca2:chr10:13514794-13515706:+	Fuca2:1	13515159	13515459	66,261,66,261	4	13514859	13515459	NA	NA	NA	NA	43	NA	NA	NA	238	104	NA	NA	NA	FALSE	NA	NA	NA	NA	FALSE	NA	NA	NA	FALSE	TRUE	NA	NA	TRUE	NA	TRUE
25614043	Fut9	chr4	-	25609332	25800146	2.56141e+07	61.3492	1	25613868	25614236	368	Fut9:chr4:25613868-25614236:-	Fut9:2	25613743	25614043	14	1	25613743	25614343	267	NA	NA	198	162	NA	NA	79	NA	NA	NA	75	NA	FALSE	FALSE	NA	NA	FALSE	TRUE	NA	NA	FALSE	NA	NA	NA	FALSE	TRUE	NA	TRUE
25614926	Fut9	chr4	-	25609332	25800146	2.56149e+07	67.9139	1	25614729	25615137	408	Fut9:chr4:25614729-25615137:-	Fut9:3	25614626	25614926		NA	25614626	25615226	21	NA	215	NA	NA	NA	NA	NA	NA	NA	174	1.42147e+26	NA	FALSE	FALSE	NA	FALSE	NA	NA	NA	NA	NA	NA	NA	TRUE	TRUE	TRUE	NA	TRUE
25619194	Fut9	chr4	-	25609332	25800146	25619194	56.5053	0.0505915	25619024	25619363	339	Fut9:chr4:25619024-25619363:-	Fut9:5	25618894	25619194		NA	25618894	25619494	226	290	107	NA	NA	NA	NA	NA	NA	232255282	88	NA	NA	FALSE	FALSE	FALSE	TRUE	NA	NA	NA	NA	NA	NA	FALSE	FALSE	NA	TRUE	NA	TRUE
25619679	Fut9	chr4	-	25609332	25800146	25619679	143.691	0.0749466	25619247	25620110	863	Fut9:chr4:25619247-25620110:-	Fut9:5	25619379	25619679	251207	2	25619379	25619979	122	185	278	NA	NA	222	NA	NA	NA	NA	10	NA	NA	FALSE	TRUE	FALSE	FALSE	NA	NA	FALSE	NA	NA	NA	NA	FALSE	NA	TRUE	NA	TRUE
65195746	Fzd3	chr14	-	65192435	65262463	6.51957e+07	57.0495	1	65195577	65195919	342	Fzd3:chr14:65195577-65195919:-	Fzd3:3	65195446	65195746		NA	65195446	65196046	36	NA	NA	NA	NA	NA	NA	130	NA	NA	165	NA	NA	FALSE	FALSE	NA	NA	NA	NA	NA	NA	TRUE	NA	NA	TRUE	NA	TRUE	NA	TRUE
65196826	Fzd3	chr14	-	65192435	65262463	6.51968e+07	57.6543	1	65196648	65196994	346	Fzd3:chr14:65196648-65196994:-	Fzd3:4	65196526	65196826	248	1	65196526	65197126	NA	NA	NA	172	NA	NA	NA	NA	NA	181189213	NA	176	NA	FALSE	NA	NA	NA	TRUE	NA	NA	NA	NA	NA	FALSE	NA	TRUE	TRUE	NA	TRUE
39037901	Fzd6	chr15	+	39006034	39038190	3.90379e+07	113.282	0.40543	39037576	39038190	614	Fzd6:chr15:39037576-39038190:+	Fzd6:1	39037901	39038190	242285287	3	39037601	39038201	169	NA	NA	NA	NA	NA	NA	174	NA	270	NA	NA	NA	FALSE	TRUE	NA	NA	NA	NA	NA	NA	TRUE	NA	FALSE	NA	NA	TRUE	NA	TRUE
37080588	Gabbr1	chr17	+	37045966	37082378	3.70805e+07	87.9488	0.156175	37080284	37080812	528	Gabbr1:chr17:37080284-37080812:+	Gabbr1:10	37080588	37080888		NA	37080288	37080888	133266	NA	232	NA	NA	NA	NA	NA	NA	NA	NA	NA	2.33234e+62	FALSE	TRUE	NA	FALSE	NA	NA	NA	NA	NA	NA	NA	NA	NA	TRUE	FALSE	TRUE
46663023	Gabbr2	chr4	-	46662305	46991873	4.6663e+07	65.9265	0.259217	46662813	46663209	396	Gabbr2:chr4:46662813-46663209:-	Gabbr2:1	46662723	46663023	284	1	46662723	46663323	137	NA	NA	NA	NA	NA	NA	NA	NA	NA	NA	250264	241242243244245	FALSE	TRUE	NA	NA	NA	NA	NA	NA	NA	NA	NA	NA	FALSE	TRUE	FALSE	TRUE
84863414	Gabpa	chr16	+	84835124	84863779	8.48635e+07	110.641	0.33159	84863151	84863779	628	Gabpa:chr16:84863151-84863779:+	Gabpa:2	84863414	84863714	222	1	84863114	84863714	34197	95	293	263	NA	NA	NA	NA	NA	201	135	54	NA	FALSE	FALSE	TRUE	FALSE	FALSE	NA	NA	NA	NA	NA	FALSE	TRUE	FALSE	TRUE	NA	TRUE
95181997	Gabpb2	chr3	-	95181766	95217754	9.5182e+07	72.4501	0.571713	95181766	95182186	420	Gabpb2:chr3:95181766-95182186:-	Gabpb2:1	95181766	95181997	231,78	2	95181697	95182297	205	NA	93	NA	NA	NA	NA	NA	NA	57210226	NA	73	NA	FALSE	FALSE	NA	TRUE	NA	NA	NA	NA	NA	NA	FALSE	NA	FALSE	TRUE	NA	TRUE
70958612	Gabra2	chr5	-	70957597	71095849	7.09586e+07	89.281	0.208116	70958381	70958917	536	Gabra2:chr5:70958381-70958917:-	Gabra2:1	70958312	70958612	220	1	70958312	70958912	193	NA	NA	NA	NA	140	NA	NA	NA	29198	NA	202	NA	FALSE	FALSE	NA	NA	NA	NA	TRUE	NA	NA	NA	FALSE	NA	FALSE	TRUE	NA	TRUE
71570102	Gabra4	chr5	-	71564566	71658308	7.15701e+07	101.686	0.31841	71569745	71570355	610	Gabra4:chr5:71569745-71570355:-	Gabra4:1	71569802	71570102	270230270230	4	71569802	71570402	222	131256	NA	NA	211	NA	NA	NA	NA	NA	NA	NA	NA	FALSE	FALSE	TRUE	NA	NA	FALSE	NA	NA	NA	NA	NA	NA	NA	TRUE	NA	TRUE
41912072	Gabrg2	chr11	-	41906856	42000857	4.1912e+07	130.234	0.22356	41911626	41912407	781	Gabrg2:chr11:41911626-41912407:-	Gabrg2:2	41911772	41912072		NA	41911772	41912372	54	105	NA	NA	NA	NA	NA	28	NA	NA	NA	NA	NA	FALSE	FALSE	TRUE	NA	NA	NA	NA	NA	FALSE	NA	NA	NA	NA	TRUE	NA	TRUE
22690815	Gad2	chr2	+	22622205	22693877	2.26908e+07	70.4795	0.493334	22690603	22691026	423	Gad2:chr2:22690603-22691026:+	Gad2:9	22690815	22691115		NA	22690515	22691115	184	92	NA	50	220	86	NA	NA	90213	22	110207225	NA	NA	FALSE	FALSE	TRUE	NA	FALSE	FALSE	FALSE	NA	NA	TRUE	FALSE	TRUE	NA	TRUE	NA	TRUE
116040855	Gadl1	chr9	+	115909455	116076176	116040855	47.0589	0.560877	116040713	116040996	283	Gadl1:chr9:116040713-116040996:+	Gadl1:2	116040855	116041155		NA	116040555	116041155	NA	NA	NA	NA	NA	NA	NA	NA	NA	NA	114252	NA	NA	FALSE	NA	NA	NA	NA	NA	NA	NA	NA	NA	NA	TRUE	NA	TRUE	NA	TRUE
5308506	Gal3st3	chr19	+	5298331	5308739	5.30848e+06	107.711	0.288461	5308157	5308739	582	Gal3st3:chr19:5308157-5308739:+	Gal3st3:3	5308506	5308739	232	1	5308206	5308806	NA	NA	NA	NA	163	NA	NA	NA	NA	215	NA	NA	NA	FALSE	NA	NA	NA	NA	TRUE	NA	NA	NA	NA	FALSE	NA	NA	TRUE	NA	TRUE
24286304	Galnt1	chr18	+	24205344	24287377	2.42863e+07	61.8017	0.0298371	24286105	24286476	371	Galnt1:chr18:24286105-24286476:+	Galnt1:9	24286304	24286604	275	1	24286004	24286604	NA	NA	NA	NA	NA	NA	NA	198	137	292	NA	NA	NA	FALSE	NA	NA	NA	NA	NA	NA	NA	FALSE	TRUE	FALSE	NA	NA	TRUE	NA	TRUE
79046422	Galr3	chr15	+	79041885	79047834	7.90464e+07	33.5401	1	79046304	79046506	202	Galr3:chr15:79046304-79046506:+	Galr3:1	79046422	79046722		NA	79046122	79046722	116	220	122	150	NA	NA	155	280	NA	1.00104e+20	144	NA	NA	FALSE	TRUE	FALSE	TRUE	TRUE	NA	NA	TRUE	FALSE	NA	TRUE	TRUE	NA	TRUE	NA	TRUE
41758227	Galt	chr4	+	41755228	41759243	41758227	58.8236	0.394059	41758050	41758403	353	Galt:chr4:41758050-41758403:+	Galt:1	41758227	41758527		NA	41757927	41758527	NA	NA	NA	95	NA	NA	NA	NA	NA	NA	NA	NA	NA	FALSE	NA	NA	NA	TRUE	NA	NA	NA	NA	NA	NA	NA	NA	TRUE	NA	TRUE
117215734	Gan	chr8	+	117158135	117216018	1.17216e+08	95.1445	0.370152	117215470	117216018	548	Gan:chr8:117215470-117216018:+	Gan:6	117215734	117216018	261	1	117215434	117216034	NA	NA	NA	NA	NA	NA	NA	212	NA	243	97	NA	NA	FALSE	NA	NA	NA	NA	NA	NA	NA	FALSE	NA	FALSE	TRUE	NA	TRUE	NA	TRUE
34677708	Gapvd1	chr2	-	34673193	34755232	3.46777e+07	95.0863	0.174863	34677385	34677956	571	Gapvd1:chr2:34677385-34677956:-	Gapvd1:3	34677408	34677708	239,220,40	3	34677408	34678008	NA	NA	NA	NA	NA	NA	NA	NA	158	202	NA	NA	NA	FALSE	NA	NA	NA	NA	NA	NA	NA	NA	TRUE	FALSE	NA	NA	TRUE	NA	TRUE
21129134	Garem1	chr18	-	21124850	21300138	2.11293e+07	30.3293	0.00759922	21129220	21129402	182	Garem1:chr18:21129220-21129402:-	Garem1:2	21128834	21129134	221109221109	4	21128834	21129434	NA	NA	NA	NA	NA	NA	274	NA	NA	202	NA	100104109114	NA	FALSE	NA	NA	NA	NA	NA	NA	FALSE	NA	NA	FALSE	NA	TRUE	TRUE	NA	TRUE
21131255	Garem1	chr18	-	21124850	21300138	2.11313e+07	31.1905	1	21131164	21131352	188	Garem1:chr18:21131164-21131352:-	Garem1:3	21130955	21131255		NA	21130955	21131555	22100	NA	NA	NA	NA	NA	NA	NA	NA	NA	NA	NA	1.02103e+17	FALSE	TRUE	NA	NA	NA	NA	NA	NA	NA	NA	NA	NA	NA	TRUE	FALSE	TRUE
115333543	Gatc	chr5	-	115332826	115341178	1.15333e+08	152.038	0.215839	115333030	115333942	912	Gatc:chr5:115333030-115333942:-	Gatc:1	115333243	115333543	278,239,78	3	115333243	115333843	280	NA	NA	254	NA	NA	NA	NA	NA	266285	72,83,87,105	109	283	FALSE	FALSE	NA	NA	FALSE	NA	NA	NA	NA	NA	FALSE	TRUE	TRUE	TRUE	FALSE	TRUE
105216768	Gbp10	chr5	-	105214907	105239533	1.05217e+08	51.1596	1	105216622	105216929	307	Gbp10:chr5:105216622-105216929:-	Gbp10:1	105216468	105216768		NA	105216468	105217068	NA	NA	137	NA	NA	237	119	31214	NA	NA	73	77	NA	FALSE	NA	NA	TRUE	NA	NA	FALSE	TRUE	FALSE	NA	NA	FALSE	FALSE	TRUE	NA	TRUE
62474767	Gcg	chr2	-	62474530	62483650	6.24748e+07	99.5764	0.2546	62474530	62475085	555	Gcg:chr2:62474530-62475085:-	Gcg:1	62474530	62474767	237	1	62474467	62475067	22212	60	NA	175	NA	NA	NA	NA	NA	216	NA	NA	NA	FALSE	FALSE	FALSE	NA	TRUE	NA	NA	NA	NA	NA	FALSE	NA	NA	TRUE	NA	TRUE
77793313	Gclc	chr9	+	77754535	77794489	7.77932e+07	45.0026	0.0125596	77793078	77793348	270	Gclc:chr9:77793078-77793348:+	Gclc:7	77793313	77793613	277	1	77793013	77793613	NA	NA	NA	NA	NA	NA	121	NA	NA	NA	NA	NA	NA	FALSE	NA	NA	NA	NA	NA	NA	TRUE	NA	NA	NA	NA	NA	TRUE	NA	TRUE
17163057	Gdap1	chr1	+	17145362	17164290	1.71631e+07	135.139	0.449911	17162711	17163522	811	Gdap1:chr1:17162711-17163522:+	Gdap1:7	17163057	17163357		NA	17162757	17163357	NA	NA	34	NA	NA	NA	NA	NA	NA	NA	NA	164	NA	FALSE	NA	NA	FALSE	NA	NA	NA	NA	NA	NA	NA	NA	TRUE	TRUE	NA	TRUE
80239602	Gdpgp1	chr7	+	80232865	80243409	8.02396e+07	77.0858	0.879532	80239361	80239824	463	Gdpgp1:chr7:80239361-80239824:+	Gdpgp1:2	80239602	80239902	216	1	80239302	80239902	92185	198	NA	NA	NA	192	NA	NA	163196	NA	NA	175	NA	FALSE	TRUE	FALSE	NA	NA	NA	FALSE	NA	NA	TRUE	NA	NA	TRUE	TRUE	NA	TRUE
11239659	Gen1	chr12	-	11238911	11265766	1.12397e+07	60.2639	0.166132	11239478	11239839	361	Gen1:chr12:11239478-11239839:-	Gen1:1	11239359	11239659		NA	11239359	11239959	NA	169	NA	NA	NA	NA	NA	NA	NA	162173	NA	80,85,90,95,100,105,109,113	NA	FALSE	NA	TRUE	NA	NA	NA	NA	NA	NA	NA	TRUE	NA	TRUE	TRUE	NA	TRUE
97176186	Gfm2	chr13	+	97137978	97181200	9.71762e+07	94.7922	0.436842	97175939	97176508	569	Gfm2:chr13:97175939-97176508:+	Gfm2:7	97176186	97176486	79223255265	4	97175886	97176486	102254	NA	NA	193	NA	NA	NA	NA	NA	237	NA	273	NA	FALSE	TRUE	NA	NA	FALSE	NA	NA	NA	NA	NA	FALSE	NA	FALSE	TRUE	NA	TRUE
49838503	Gfpt2	chr11	+	49794187	49838628	4.98385e+07	66.302	0.927937	49838253	49838628	375	Gfpt2:chr11:49838253-49838628:+	Gfpt2:2	49838503	49838628	52109	2	49838203	49838803	51	NA	NA	NA	NA	NA	NA	NA	NA	90	NA	NA	NA	FALSE	FALSE	NA	NA	NA	NA	NA	NA	NA	NA	TRUE	NA	NA	TRUE	NA	TRUE
84832426	Ggnbp2	chr11	-	84831649	84870738	8.48322e+07	29.8374	0.00621224	84832081	84832260	179	Ggnbp2:chr11:84832081-84832260:-	Ggnbp2:1	84832126	84832426	65	1	84832126	84832726	56	NA	NA	149	NA	NA	NA	157	NA	46	NA	NA	NA	FALSE	FALSE	NA	NA	TRUE	NA	NA	NA	TRUE	NA	FALSE	NA	NA	TRUE	NA	TRUE
14051016	Ggps1	chr13	-	14049744	14063488	1.40509e+07	124.18	0.438309	14050572	14051317	745	Ggps1:chr13:14050572-14051317:-	Ggps1:1	14050716	14051016	293,103,87	3	14050716	14051316	NA	NA	NA	NA	NA	NA	NA	133	NA	NA	NA	NA	NA	FALSE	NA	NA	NA	NA	NA	NA	NA	TRUE	NA	NA	NA	NA	TRUE	NA	TRUE
14052887	Ggps1	chr13	-	14049744	14063488	1.40529e+07	32.0739	0.0113242	14052821	14053013	192	Ggps1:chr13:14052821-14053013:-	Ggps1:2	14052587	14052887	257202	2	14052587	14053187	NA	NA	NA	NA	NA	NA	NA	NA	NA	NA	NA	160	NA	FALSE	NA	NA	NA	NA	NA	NA	NA	NA	NA	NA	NA	TRUE	TRUE	NA	TRUE
14053227	Ggps1	chr13	-	14049744	14063488	1.40535e+07	41.3776	0.0074137	14053340	14053588	248	Ggps1:chr13:14053340-14053588:-	Ggps1:2	14052927	14053227	247	1	14052927	14053527	116	NA	NA	160	NA	NA	NA	NA	NA	222	243	122	NA	FALSE	TRUE	NA	NA	TRUE	NA	NA	NA	NA	NA	FALSE	FALSE	TRUE	TRUE	NA	TRUE
14054341	Ggps1	chr13	-	14049744	14063488	14054341	57.1655	0.0272882	14054169	14054512	343	Ggps1:chr13:14054169-14054512:-	Ggps1:3	14054041	14054341	107	1	14054041	14054641	NA	175	NA	NA	NA	NA	NA	NA	173	NA	NA	NA	NA	FALSE	NA	TRUE	NA	NA	NA	NA	NA	NA	TRUE	NA	NA	NA	TRUE	NA	TRUE
100766445	Ghdc	chr11	-	100766017	100770957	1.00766e+08	63.4713	1	100766254	100766635	381	Ghdc:chr11:100766254-100766635:-	Ghdc:1	100766145	100766445		NA	100766145	100766745	NA	NA	NA	NA	NA	NA	NA	NA	NA	95,99	1.10114e+50	NA	NA	FALSE	NA	NA	NA	NA	NA	NA	NA	NA	NA	TRUE	TRUE	NA	TRUE	NA	TRUE
60443431	Gid4	chr11	+	60417262	60445298	6.04434e+07	136.94	0.4995	60442969	60443790	821	Gid4:chr11:60442969-60443790:+	Gid4:16	60443431	60443731		NA	60443131	60443731	NA	NA	NA	NA	NA	160	NA	NA	NA	NA	108214	NA	NA	FALSE	NA	NA	NA	NA	NA	TRUE	NA	NA	NA	NA	TRUE	NA	TRUE	NA	TRUE
60443484	Gid4	chr11	+	60417262	60445298	6.04435e+07	43.5091	0.5005	60443345	60443606	261	Gid4:chr11:60443345-60443606:+	Gid4:16	60443484	60443784		NA	60443184	60443784	NA	NA	NA	NA	NA	107	NA	NA	NA	NA	55161	NA	NA	FALSE	NA	NA	NA	NA	NA	TRUE	NA	NA	NA	NA	TRUE	NA	TRUE	NA	TRUE
60444875	Gid4	chr11	+	60417262	60445298	6.0445e+07	112.55	0.142305	60444620	60445295	675	Gid4:chr11:60444620-60445295:+	Gid4:17	60444875	60445175	210272	2	60444575	60445175	141178237	NA	NA	114	NA	NA	NA	NA	NA	NA	147204	30	NA	FALSE	TRUE	NA	NA	TRUE	NA	NA	NA	NA	NA	NA	TRUE	FALSE	TRUE	NA	TRUE
97777611	Gin1	chr1	+	97770179	97793716	97777611	143.416	0.0172765	97777180	97778041	861	Gin1:chr1:97777180-97778041:+	Gin1:3	97777611	97777911	273	1	97777311	97777911	NA	99	NA	NA	51104	NA	NA	NA	NA	255	37112	NA	NA	FALSE	NA	TRUE	NA	NA	TRUE	NA	NA	NA	NA	FALSE	TRUE	NA	TRUE	NA	TRUE
97777936	Gin1	chr1	+	97770179	97793716	97777936	56.0903	0.380035	97777767	97778104	337	Gin1:chr1:97777767-97778104:+	Gin1:3	97777936	97778236	203	1	97777636	97778236	NA	NA	NA	NA	NA	NA	NA	NA	NA	NA	NA	159163174	NA	FALSE	NA	NA	NA	NA	NA	NA	NA	NA	NA	NA	NA	TRUE	TRUE	NA	TRUE
150930859	Gins1	chr2	+	150909594	150934289	1.50931e+08	67.4434	0.21136	150930790	150931195	405	Gins1:chr2:150930790-150931195:+	Gins1:3	150930859	150931159	268	1	150930559	150931159	138	NA	NA	NA	NA	NA	NA	NA	NA	NA	248	260	NA	FALSE	TRUE	NA	NA	NA	NA	NA	NA	NA	NA	NA	FALSE	FALSE	TRUE	NA	TRUE
57098983	Gjb2	chr14	-	57098450	57104702	5.70991e+07	84.7179	0.0537024	57098814	57099322	508	Gjb2:chr14:57098814-57099322:-	Gjb2:1	57098683	57098983	266,18	2	57098683	57099283	NA	NA	NA	NA	NA	NA	NA	NA	NA	247	86,95	185	NA	FALSE	NA	NA	NA	NA	NA	NA	NA	NA	NA	FALSE	TRUE	FALSE	TRUE	NA	TRUE
96179042	Gk5	chr9	+	96119362	96184627	9.6179e+07	55.3047	1	96178874	96179206	332	Gk5:chr9:96178874-96179206:+	Gk5:4	96179042	96179342	266	1	96178742	96179342	168228	NA	NA	NA	NA	NA	NA	NA	NA	NA	NA	172177182187	NA	FALSE	TRUE	NA	NA	NA	NA	NA	NA	NA	NA	NA	NA	TRUE	TRUE	NA	TRUE
8597180	Glcci1	chr6	+	8509600	8597549	8.59719e+06	77.303	0.107232	8596962	8597425	463	Glcci1:chr6:8596962-8597425:+	Glcci1:8	8597180	8597480	104289300	3	8596880	8597480	98203	NA	NA	NA	90	NA	54	NA	NA	NA	284	NA	NA	FALSE	TRUE	NA	NA	NA	TRUE	NA	FALSE	NA	NA	NA	FALSE	NA	TRUE	NA	TRUE
30596382	Glo1	chr17	-	30584936	30626871	3.05964e+07	24.0185	1	30596325	30596469	144	Glo1:chr17:30596325-30596469:-	Glo1:3	30596082	30596382	8	1	30596082	30596682	NA	NA	NA	NA	NA	251	NA	223	NA	166219236	NA	170	NA	FALSE	NA	NA	NA	NA	NA	FALSE	NA	FALSE	NA	TRUE	NA	TRUE	TRUE	NA	TRUE
76220864	Glod4	chr11	-	76209294	76243725	7.62209e+07	56.0462	1	76220697	76221033	336	Glod4:chr11:76220697-76221033:-	Glod4:3	76220564	76220864	223,12	2	76220564	76221164	NA	NA	NA	NA	NA	NA	NA	NA	NA	179183187	NA	NA	2.07208e+23	FALSE	NA	NA	NA	NA	NA	NA	NA	NA	NA	TRUE	NA	NA	TRUE	FALSE	TRUE
52185233	Gls	chr1	-	52163445	52233232	5.21852e+07	65.8035	0.138211	52184981	52185376	395	Gls:chr1:52184981-52185376:-	Gls:3	52184933	52185233	212	1	52184933	52185533	191	NA	NA	226	NA	NA	NA	143	NA	195	99233243250	21	NA	FALSE	FALSE	NA	NA	FALSE	NA	NA	NA	TRUE	NA	FALSE	TRUE	FALSE	TRUE	NA	TRUE
69366745	Gm10033	chr8	-	69366510	69395522	6.93667e+07	48.6521	1	69366591	69366883	292	Gm10033:chr8:69366591-69366883:-	Gm10033:1	69366510	69366745	235235	2	69366445	69367045	NA	NA	NA	NA	NA	NA	NA	NA	NA	27,65	69114220	NA	NA	FALSE	NA	NA	NA	NA	NA	NA	NA	NA	NA	FALSE	TRUE	NA	TRUE	NA	TRUE
69371039	Gm10033	chr8	-	69366510	69395522	6.93707e+07	23.4973	0.0105028	69370658	69370799	141	Gm10033:chr8:69370658-69370799:-	Gm10033:3	69370739	69371039	71,14,71,14,71,14	6	69370739	69371339	122	54	NA	NA	NA	NA	NA	NA	NA	NA	NA	NA	NA	FALSE	TRUE	FALSE	NA	NA	NA	NA	NA	NA	NA	NA	NA	NA	TRUE	NA	TRUE
24876190	Gm10053	chr19	+	24875686	24876902	24876190	40.6592	0.100105	24876068	24876311	243	Gm10053:chr19:24876068-24876311:+	Gm10053:1	24876190	24876490	28	1	24875890	24876490	NA	NA	NA	23134	44	7	163	NA	NA	NA	NA	NA	NA	FALSE	NA	NA	NA	TRUE	FALSE	FALSE	TRUE	NA	NA	NA	NA	NA	TRUE	NA	TRUE
24876559	Gm10053	chr19	+	24875686	24876902	24876559	129.916	0.0728919	24876169	24876902	733	Gm10053:chr19:24876169-24876902:+	Gm10053:1	24876559	24876859	72	1	24876259	24876859	128	NA	NA	NA	93295	NA	NA	NA	NA	53258	NA	NA	NA	FALSE	TRUE	NA	NA	NA	TRUE	NA	NA	NA	NA	FALSE	NA	NA	TRUE	NA	TRUE
24876671	Gm10053	chr19	+	24875686	24876902	24876671	42.6198	0.107649	24876543	24876798	255	Gm10053:chr19:24876543-24876798:+	Gm10053:1	24876671	24876902	213	1	24876371	24876971	16	NA	NA	NA	183	NA	NA	NA	NA	146	NA	NA	NA	FALSE	FALSE	NA	NA	NA	FALSE	NA	NA	NA	NA	TRUE	NA	NA	TRUE	NA	TRUE
150326807	Gm10130	chr2	+	150311431	150329040	1.50327e+08	67.2758	1	150326606	150327009	403	Gm10130:chr2:150326606-150327009:+	Gm10130:1	150326807	150327107	205	1	150326507	150327107	NA	NA	153	NA	178	NA	NA	NA	NA	182187	193	197	NA	FALSE	NA	NA	TRUE	NA	TRUE	NA	NA	NA	NA	FALSE	FALSE	FALSE	TRUE	NA	TRUE
34111141	Gm10131	chr8	-	34110995	34111737	3.41111e+07	58.1228	1	34110995	34111322	327	Gm10131:chr8:34110995-34111322:-	Gm10131:1	34110995	34111141		NA	34110841	34111441	NA	NA	NA	NA	NA	NA	NA	NA	NA	122	126	NA	NA	FALSE	NA	NA	NA	NA	NA	NA	NA	NA	NA	TRUE	TRUE	NA	TRUE	NA	TRUE
72304266	Gm10282	chr8	-	72304110	72305260	7.23043e+07	48.429	1	72304111	72304402	291	Gm10282:chr8:72304111-72304402:-	Gm10282:1	72304110	72304266		NA	72303966	72304566	NA	NA	NA	NA	NA	NA	NA	NA	NA	131	NA	NA	NA	FALSE	NA	NA	NA	NA	NA	NA	NA	NA	NA	TRUE	NA	NA	TRUE	NA	TRUE
98489599	Gm10320	chr13	-	98489348	98492001	98489599	58.5538	0.75236	98489423	98489774	351	Gm10320:chr13:98489423-98489774:-	Gm10320:1	98489348	98489599	251237	2	98489299	98489899	NA	NA	NA	NA	NA	NA	NA	NA	NA	218	NA	120	NA	FALSE	NA	NA	NA	NA	NA	NA	NA	NA	NA	FALSE	NA	TRUE	TRUE	NA	TRUE
81664237	Gm10778	chr10	+	81649059	81667361	81664237	74.5274	0.0016047	81664013	81664460	447	Gm10778:chr10:81664013-81664460:+	Gm10778:3	81664237	81664537		NA	81663937	81664537	NA	NA	NA	NA	22191240	153	NA	NA	NA	NA	NA	NA	NA	FALSE	NA	NA	NA	NA	FALSE	TRUE	NA	NA	NA	NA	NA	NA	TRUE	NA	TRUE
81664343	Gm10778	chr10	+	81649059	81667361	81664343	50.9163	0.15033	81664190	81664495	305	Gm10778:chr10:81664190-81664495:+	Gm10778:3	81664343	81664643		NA	81664043	81664643	NA	NA	NA	NA	85134	47	NA	NA	NA	NA	NA	NA	NA	FALSE	NA	NA	NA	NA	TRUE	FALSE	NA	NA	NA	NA	NA	NA	TRUE	NA	TRUE
81664577	Gm10778	chr10	+	81649059	81667361	81664577	67.4802	0.70186	81664374	81664779	405	Gm10778:chr10:81664374-81664779:+	Gm10778:3	81664577	81664877		NA	81664277	81664877	126	NA	NA	NA	NA	NA	NA	192	NA	110114118175	NA	NA	NA	FALSE	TRUE	NA	NA	NA	NA	NA	NA	FALSE	NA	TRUE	NA	NA	TRUE	NA	TRUE
81666597	Gm10778	chr10	+	81649059	81667361	8.16666e+07	63.9628	1	81666403	81666787	384	Gm10778:chr10:81666403-81666787:+	Gm10778:4	81666597	81666897		NA	81666297	81666897	NA	NA	NA	NA	NA	NA	NA	NA	NA	141	NA	NA	NA	FALSE	NA	NA	NA	NA	NA	NA	NA	NA	NA	TRUE	NA	NA	TRUE	NA	TRUE
175651360	Gm11007	chr2	+	175643978	175672517	175651360	51.056	0.0388917	175651206	175651513	307	Gm11007:chr2:175651206-175651513:+	Gm11007:1	175651360	175651660	41	1	175651060	175651660	267	NA	NA	165	NA	103	NA	NA	NA	NA	77107	NA	NA	FALSE	FALSE	NA	NA	TRUE	NA	TRUE	NA	NA	NA	NA	TRUE	NA	TRUE	NA	TRUE
175654630	Gm11007	chr2	+	175643978	175672517	1.75655e+08	35.2633	1	175654505	175654717	212	Gm11007:chr2:175654505-175654717:+	Gm11007:2	175654630	175654930		NA	175654330	175654930	NA	NA	NA	101	84	18	NA	57262	295	22283	188	193203	NA	FALSE	NA	NA	NA	TRUE	FALSE	FALSE	NA	FALSE	FALSE	FALSE	FALSE	FALSE	TRUE	NA	TRUE
175656015	Gm11007	chr2	+	175643978	175672517	1.75656e+08	73.652	0.112743	175655774	175656216	442	Gm11007:chr2:175655774-175656216:+	Gm11007:3	175656015	175656315		NA	175655715	175656315	151	NA	NA	NA	NA	NA	NA	NA	NA	NA	223	NA	NA	FALSE	TRUE	NA	NA	NA	NA	NA	NA	NA	NA	NA	FALSE	NA	TRUE	NA	TRUE
175656583	Gm11007	chr2	+	175643978	175672517	1.75657e+08	50.2417	0.887257	175656425	175656727	302	Gm11007:chr2:175656425-175656727:+	Gm11007:3	175656583	175656883		NA	175656283	175656883	190	NA	NA	NA	NA	NA	NA	165	NA	46157173	161169	NA	NA	FALSE	FALSE	NA	NA	NA	NA	NA	NA	TRUE	NA	TRUE	TRUE	NA	TRUE	NA	TRUE
175662508	Gm11007	chr2	+	175643978	175672517	1.75662e+08	27.8801	0.246947	175662410	175662577	167	Gm11007:chr2:175662410-175662577:+	Gm11007:4	175662508	175662808		NA	175662208	175662808	NA	NA	103212	NA	NA	NA	NA	160	NA	NA	272	NA	NA	FALSE	NA	NA	TRUE	NA	NA	NA	NA	TRUE	NA	NA	FALSE	NA	TRUE	NA	TRUE
175664397	Gm11007	chr2	+	175643978	175672517	1.75664e+08	57.1495	1	175664234	175664577	343	Gm11007:chr2:175664234-175664577:+	Gm11007:5	175664397	175664697		NA	175664097	175664697	169	NA	NA	NA	NA	NA	139	37179	NA	175	145	NA	NA	FALSE	TRUE	NA	NA	NA	NA	NA	TRUE	TRUE	NA	TRUE	TRUE	NA	TRUE	NA	TRUE
13949485	Gm11100	chr14	+	13918334	13951132	1.39494e+07	177.689	1	13948823	13949889	1066	Gm11100:chr14:13948823-13949889:+	Gm11100:2	13949485	13949785		NA	13949185	13949785	NA	NA	NA	NA	35,72	NA	49	NA	NA	NA	152	84	75,76,77,78,79,80,81,82,83,84,85,86,87,88	FALSE	NA	NA	NA	NA	FALSE	NA	FALSE	NA	NA	NA	TRUE	FALSE	TRUE	FALSE	TRUE
102576575	Gm11627	chr11	-	102576396	102579461	1.02577e+08	75.9781	1	102576396	102576794	398	Gm11627:chr11:102576396-102576794:-	Gm11627:1	102576396	102576575	84	1	102576275	102576875	44	161	NA	NA	NA	NA	NA	NA	159	NA	79	NA	NA	FALSE	FALSE	TRUE	NA	NA	NA	NA	NA	NA	TRUE	NA	FALSE	NA	TRUE	NA	TRUE
48825583	Gm12184	chr11	-	48822035	48826655	4.88256e+07	74.5978	0.840421	48825364	48825812	448	Gm12184:chr11:48825364-48825812:-	Gm12184:1	48825283	48825583	277263237	3	48825283	48825883	30272	NA	NA	NA	223	NA	NA	NA	NA	207	57160237	NA	2.25226e+17	FALSE	FALSE	NA	NA	NA	FALSE	NA	NA	NA	NA	FALSE	TRUE	NA	TRUE	FALSE	TRUE
53784918	Gm12216	chr11	-	53783347	53859256	5.3785e+07	93.0102	1	53784693	53785252	559	Gm12216:chr11:53784693-53785252:-	Gm12216:1	53784618	53784918		NA	53784618	53785218	106	NA	NA	NA	NA	NA	NA	NA	NA	NA	90,94	NA	74,75,76,77,78,79,80,81,82,83	FALSE	TRUE	NA	NA	NA	NA	NA	NA	NA	NA	NA	TRUE	NA	TRUE	FALSE	TRUE
42158903	Gm13305	chr4	-	42158116	42168603	4.2159e+07	78.9236	0.681602	42158790	42159263	473	Gm13305:chr4:42158790-42159263:-	Gm13305:1	42158603	42158903	61	1	42158603	42159203	135	NA	NA	NA	NA	NA	NA	NA	NA	38	NA	NA	NA	FALSE	TRUE	NA	NA	NA	NA	NA	NA	NA	NA	FALSE	NA	NA	TRUE	NA	TRUE
175784837	Gm14288	chr2	-	175784077	175801093	1.75785e+08	129.063	1	175784511	175785286	775	Gm14288:chr2:175784511-175785286:-	Gm14288:1	175784537	175784837	21	1	175784537	175785137	NA	NA	NA	NA	97	109	NA	NA	NA	2116	121125286	NA	NA	FALSE	NA	NA	NA	NA	TRUE	TRUE	NA	NA	NA	TRUE	TRUE	NA	TRUE	NA	TRUE
175785642	Gm14288	chr2	-	175784077	175801093	1.75786e+08	52.9506	0.727102	175785492	175785810	318	Gm14288:chr2:175785492-175785810:-	Gm14288:2	175785342	175785642		NA	175785342	175785942	205	NA	NA	NA	125	178	NA	NA	NA	232	NA	NA	NA	FALSE	FALSE	NA	NA	NA	TRUE	TRUE	NA	NA	NA	FALSE	NA	NA	TRUE	NA	TRUE
175791539	Gm14288	chr2	-	175784077	175801093	1.75792e+08	136.387	0.294715	175791205	175792024	819	Gm14288:chr2:175791205-175792024:-	Gm14288:3	175791239	175791539	296296	2	175791239	175791839	139	NA	157	NA	NA	NA	NA	126	NA	NA	NA	87	NA	FALSE	TRUE	NA	TRUE	NA	NA	NA	NA	TRUE	NA	NA	NA	FALSE	TRUE	NA	TRUE
175791711	Gm14288	chr2	-	175784077	175801093	1.75792e+08	82.3425	0.705285	175791457	175791951	494	Gm14288:chr2:175791457-175791951:-	Gm14288:3	175791411	175791711		NA	175791411	175792011	NA	165	NA	NA	NA	NA	NA	NA	NA	NA	NA	72259	NA	FALSE	NA	TRUE	NA	NA	NA	NA	NA	NA	NA	NA	NA	FALSE	TRUE	NA	TRUE
176807756	Gm14295	chr2	+	176798612	176815402	1.76808e+08	117.951	0.0810546	176807468	176808176	708	Gm14295:chr2:176807468-176808176:+	Gm14295:2	176807756	176808056	3	1	176807456	176808056	229	NA	NA	127	NA	65	NA	NA	NA	NA	39,69	NA	NA	FALSE	FALSE	NA	NA	TRUE	NA	FALSE	NA	NA	NA	NA	FALSE	NA	TRUE	NA	TRUE
176808597	Gm14295	chr2	+	176798612	176815402	1.76809e+08	30.8317	0.453543	176808500	176808685	185	Gm14295:chr2:176808500-176808685:+	Gm14295:2	176808597	176808897	21,72,99	3	176808297	176808897	231	85175	249	NA	NA	NA	NA	218	173	NA	279	179	NA	FALSE	FALSE	TRUE	FALSE	NA	NA	NA	NA	FALSE	TRUE	NA	FALSE	TRUE	TRUE	NA	TRUE
176811993	Gm14295	chr2	+	176798612	176815402	1.76812e+08	36.144	1	176811865	176812082	217	Gm14295:chr2:176811865-176812082:+	Gm14295:3	176811993	176812293		NA	176811693	176812293	NA	NA	NA	100	83	17	NA	56261	294	21282	187	192202	NA	FALSE	NA	NA	NA	TRUE	FALSE	FALSE	NA	FALSE	FALSE	FALSE	FALSE	FALSE	TRUE	NA	TRUE
176813945	Gm14295	chr2	+	176798612	176815402	1.76814e+08	36.0036	1	176813822	176814038	216	Gm14295:chr2:176813822-176814038:+	Gm14295:4	176813945	176814245		NA	176813645	176814245	191	NA	NA	NA	NA	NA	NA	166	NA	46158174	162170	NA	NA	FALSE	FALSE	NA	NA	NA	NA	NA	NA	TRUE	NA	TRUE	TRUE	NA	TRUE	NA	TRUE
176914936	Gm14296	chr2	-	176914048	176927809	1.76915e+08	63.7083	1	176914752	176915135	383	Gm14296:chr2:176914752-176915135:-	Gm14296:2	176914636	176914936		NA	176914636	176915236	263282	NA	NA	NA	NA	18	NA	NA	NA	108	NA	NA	NA	FALSE	FALSE	NA	NA	NA	NA	FALSE	NA	NA	NA	TRUE	NA	NA	TRUE	NA	TRUE
176730479	Gm14305	chr2	+	176708328	176740458	1.7673e+08	38.7169	1	176730348	176730581	233	Gm14305:chr2:176730348-176730581:+	Gm14305:4	176730479	176730779		NA	176730179	176730779	NA	NA	97206	NA	NA	NA	NA	154	NA	NA	266	NA	NA	FALSE	NA	NA	TRUE	NA	NA	NA	NA	TRUE	NA	NA	FALSE	NA	TRUE	NA	TRUE
176620140	Gm14308	chr2	-	176619933	176636343	1.7662e+08	36.1988	1	176620022	176620239	217	Gm14308:chr2:176620022-176620239:-	Gm14308:1	176619933	176620140		NA	176619840	176620440	NA	NA	NA	NA	NA	NA	NA	186	NA	67178194	182190	NA	NA	FALSE	NA	NA	NA	NA	NA	NA	NA	FALSE	NA	TRUE	FALSE	NA	TRUE	NA	TRUE
176624471	Gm14308	chr2	-	176619933	176636343	176624471	111.363	0.262823	176624136	176624805	669	Gm14308:chr2:176624136-176624805:-	Gm14308:2	176624171	176624471	277	1	176624171	176624771	242	95186	260	NA	NA	NA	NA	229	184	NA	290	1190	NA	FALSE	FALSE	TRUE	FALSE	NA	NA	NA	NA	FALSE	FALSE	NA	FALSE	FALSE	TRUE	NA	TRUE
176624587	Gm14308	chr2	-	176619933	176636343	176624587	44.6912	0.342454	176624452	176624721	269	Gm14308:chr2:176624452-176624721:-	Gm14308:2	176624287	176624587		NA	176624287	176624887	NA	211	NA	NA	NA	NA	NA	NA	NA	NA	NA	117	NA	FALSE	NA	FALSE	NA	NA	NA	NA	NA	NA	NA	NA	NA	TRUE	TRUE	NA	TRUE
176625339	Gm14308	chr2	-	176619933	176636343	176625339	58.294	0.039823	176625164	176625513	349	Gm14308:chr2:176625164-176625513:-	Gm14308:2	176625039	176625339		NA	176625039	176625639	264	NA	NA	162	NA	100	NA	NA	NA	NA	74104	NA	NA	FALSE	FALSE	NA	NA	TRUE	NA	TRUE	NA	NA	NA	NA	TRUE	NA	TRUE	NA	TRUE
177830991	Gm14325	chr2	-	177828821	177840336	1.77831e+08	38.0576	0.310908	177830880	177831108	228	Gm14325:chr2:177830880-177831108:-	Gm14325:2	177830691	177830991	279	1	177830691	177831291	NA	NA	NA	65	48	NA	NA	21226	259	247	152	157	NA	FALSE	NA	NA	NA	FALSE	FALSE	NA	NA	FALSE	FALSE	FALSE	TRUE	TRUE	TRUE	NA	TRUE
177831171	Gm14325	chr2	-	177828821	177840336	1.77831e+08	41.4481	0.217722	177831030	177831279	249	Gm14325:chr2:177831030-177831279:-	Gm14325:2	177830871	177831171		NA	177830871	177831471	NA	NA	NA	245	228	NA	NA	201	121	NA	166	NA	NA	FALSE	NA	NA	NA	FALSE	FALSE	NA	NA	FALSE	TRUE	NA	TRUE	NA	TRUE	NA	TRUE
177934125	Gm14326	chr2	-	177926815	177957288	1.77934e+08	45.6603	1	177933988	177934262	274	Gm14326:chr2:177933988-177934262:-	Gm14326:1	177933825	177934125		NA	177933825	177934425	NA	NA	NA	NA	NA	NA	NA	NA	55	71130280	134179	92	NA	FALSE	NA	NA	NA	NA	NA	NA	NA	NA	FALSE	TRUE	TRUE	TRUE	TRUE	NA	TRUE
177936025	Gm14326	chr2	-	177926815	177957288	177936025	33.1107	0.509444	177935925	177936124	199	Gm14326:chr2:177935925-177936124:-	Gm14326:2	177935725	177936025	32	1	177935725	177936325	24	NA	NA	NA	NA	NA	NA	NA	NA	13173	69	NA	NA	FALSE	FALSE	NA	NA	NA	NA	NA	NA	NA	NA	TRUE	FALSE	NA	TRUE	NA	TRUE
177943024	Gm14326	chr2	-	177926815	177957288	1.77943e+08	156.793	0.475957	177942522	177943463	941	Gm14326:chr2:177942522-177943463:-	Gm14326:3	177942724	177943024		NA	177942724	177943324	NA	NA	NA	NA	NA	160	NA	NA	NA	274	164	NA	NA	FALSE	NA	NA	NA	NA	NA	TRUE	NA	NA	NA	FALSE	TRUE	NA	TRUE	NA	TRUE
177944745	Gm14326	chr2	-	177926815	177957288	1.77945e+08	42.0609	1	177944622	177944874	252	Gm14326:chr2:177944622-177944874:-	Gm14326:4	177944445	177944745	277	1	177944445	177945045	NA	NA	NA	71	54	NA	NA	27232	265	253	158	163173	NA	FALSE	NA	NA	NA	FALSE	FALSE	NA	NA	FALSE	FALSE	FALSE	TRUE	TRUE	TRUE	NA	TRUE
177948208	Gm14326	chr2	-	177926815	177957288	177948208	72.0525	0.547972	177947991	177948424	433	Gm14326:chr2:177947991-177948424:-	Gm14326:6	177947908	177948208	251	1	177947908	177948508	267	NA	NA	166	NA	104	NA	NA	NA	NA	78108	NA	NA	FALSE	FALSE	NA	NA	TRUE	NA	TRUE	NA	NA	NA	NA	TRUE	NA	TRUE	NA	TRUE
177905528	Gm14327	chr2	+	177897096	177909801	1.77906e+08	70.6441	0.537365	177905311	177905735	424	Gm14327:chr2:177905311-177905735:+	Gm14327:2	177905528	177905828	256	1	177905228	177905828	223	77	241	NA	NA	NA	NA	210	NA	NA	NA	171	NA	FALSE	FALSE	FALSE	FALSE	NA	NA	NA	NA	FALSE	NA	NA	NA	TRUE	TRUE	NA	TRUE
175192200	Gm14391	chr2	-	175186632	175206903	1.75192e+08	39.8158	1	175192082	175192321	239	Gm14391:chr2:175192082-175192321:-	Gm14391:1	175191900	175192200		NA	175191900	175192500	198	NA	NA	NA	NA	NA	NA	174	NA	54166182	170178	NA	NA	FALSE	FALSE	NA	NA	NA	NA	NA	NA	TRUE	NA	TRUE	TRUE	NA	TRUE	NA	TRUE
175194178	Gm14391	chr2	-	175186632	175206903	1.75194e+08	40.5728	1	175194046	175194289	243	Gm14391:chr2:175194046-175194289:-	Gm14391:2	175193878	175194178		NA	175193878	175194478	NA	NA	NA	134	117	51	NA	90295	5	55	221	226236	NA	FALSE	NA	NA	NA	TRUE	TRUE	FALSE	NA	TRUE	FALSE	FALSE	FALSE	FALSE	TRUE	NA	TRUE
175197559	Gm14391	chr2	-	175186632	175206903	175197559	31.7944	0.0620077	175197463	175197654	191	Gm14391:chr2:175197463-175197654:-	Gm14391:3	175197259	175197559		NA	175197259	175197859	244	NA	NA	142	NA	80	NA	NA	NA	NA	54,84	NA	NA	FALSE	FALSE	NA	NA	TRUE	NA	FALSE	NA	NA	NA	NA	FALSE	NA	TRUE	NA	TRUE
175118340	Gm14399	chr2	-	175111255	175141999	1.75118e+08	75.242	0.358619	175118091	175118543	452	Gm14399:chr2:175118091-175118543:-	Gm14399:1	175118040	175118340		NA	175118040	175118640	NA	NA	NA	NA	103	168	NA	142	NA	39	194214276	181	NA	FALSE	NA	NA	NA	NA	TRUE	TRUE	NA	TRUE	NA	FALSE	FALSE	FALSE	TRUE	NA	TRUE
175118573	Gm14399	chr2	-	175111255	175141999	1.75119e+08	57.0697	0.641381	175118397	175118739	342	Gm14399:chr2:175118397-175118739:-	Gm14399:1	175118273	175118573		NA	175118273	175118873	NA	NA	NA	NA	NA	NA	NA	NA	47	63122272	126171	84	NA	FALSE	NA	NA	NA	NA	NA	NA	NA	NA	FALSE	TRUE	TRUE	FALSE	TRUE	NA	TRUE
175120466	Gm14399	chr2	-	175111255	175141999	1.7512e+08	33.0866	0.415708	175120376	175120574	198	Gm14399:chr2:175120376-175120574:-	Gm14399:2	175120166	175120466		NA	175120166	175120766	17	NA	166	NA	NA	NA	NA	NA	NA	6	62	NA	NA	FALSE	FALSE	NA	TRUE	NA	NA	NA	NA	NA	NA	FALSE	FALSE	NA	TRUE	NA	TRUE
175129353	Gm14399	chr2	-	175111255	175141999	1.75129e+08	31.3305	0.476484	175129257	175129445	188	Gm14399:chr2:175129257-175129445:-	Gm14399:4	175129053	175129353	296	1	175129053	175129653	NA	NA	NA	90	73	NA	NA	46251	NA	272	11177	182192	NA	FALSE	NA	NA	NA	TRUE	FALSE	NA	NA	FALSE	NA	FALSE	TRUE	FALSE	TRUE	NA	TRUE
175129516	Gm14399	chr2	-	175111255	175141999	1.7513e+08	47.0107	0.523516	175129365	175129647	282	Gm14399:chr2:175129365-175129647:-	Gm14399:4	175129216	175129516	23	1	175129216	175129816	NA	NA	NA	253	236	NA	NA	209	129	NA	174	NA	NA	FALSE	NA	NA	NA	FALSE	FALSE	NA	NA	FALSE	TRUE	NA	TRUE	NA	TRUE	NA	TRUE
175132977	Gm14399	chr2	-	175111255	175141999	175132977	22.9503	0.451782	175132908	175133045	137	Gm14399:chr2:175132908-175133045:-	Gm14399:6	175132677	175132977	205,52	2	175132677	175133277	277	NA	NA	176	NA	114	NA	NA	NA	NA	88118	NA	NA	FALSE	FALSE	NA	NA	TRUE	NA	TRUE	NA	NA	NA	NA	TRUE	NA	TRUE	NA	TRUE
177084617	Gm14401	chr2	+	177074320	177087034	177084617	22.0259	0.654633	177084550	177084683	133	Gm14401:chr2:177084550-177084683:+	Gm14401:1	177084617	177084917	23	1	177084317	177084917	248	55	NA	147	NA	85	NA	NA	NA	NA	59,89	NA	NA	FALSE	FALSE	FALSE	NA	TRUE	NA	FALSE	NA	NA	NA	NA	FALSE	NA	TRUE	NA	TRUE
177190794	Gm14410	chr2	-	177190169	177206421	1.77191e+08	106.066	0.145841	177190479	177191115	636	Gm14410:chr2:177190479-177191115:-	Gm14410:1	177190494	177190794		NA	177190494	177191094	126	NA	NA	NA	NA	NA	NA	NA	NA	NA	198	NA	NA	FALSE	TRUE	NA	NA	NA	NA	NA	NA	NA	NA	NA	FALSE	NA	TRUE	NA	TRUE
177192069	Gm14410	chr2	-	177190169	177206421	1.77192e+08	34.5292	0.171369	177191957	177192164	207	Gm14410:chr2:177191957-177192164:-	Gm14410:2	177191769	177192069		NA	177191769	177192369	248	NA	NA	221	NA	NA	NA	127	160	148	53	58,68	NA	FALSE	FALSE	NA	NA	FALSE	NA	NA	NA	TRUE	TRUE	TRUE	FALSE	FALSE	TRUE	NA	TRUE
177192247	Gm14410	chr2	-	177190169	177206421	1.77192e+08	89.2639	0.801157	177191985	177192520	535	Gm14410:chr2:177191985-177192520:-	Gm14410:2	177191947	177192247		NA	177191947	177192547	NA	NA	NA	144	127	61	NA	100	15	65	231	236246	NA	FALSE	NA	NA	NA	TRUE	TRUE	FALSE	NA	TRUE	FALSE	FALSE	FALSE	FALSE	TRUE	NA	TRUE
177192359	Gm14410	chr2	-	177190169	177206421	1.77193e+08	25.3713	0.0274745	177192544	177192696	152	Gm14410:chr2:177192544-177192696:-	Gm14410:2	177192059	177192359		NA	177192059	177192659	NA	NA	NA	256	239	173	NA	212	127	177	NA	NA	NA	FALSE	NA	NA	NA	FALSE	FALSE	TRUE	NA	FALSE	TRUE	TRUE	NA	NA	TRUE	NA	TRUE
177195471	Gm14410	chr2	-	177190169	177206421	177195471	35.0241	0.0295069	177195365	177195576	211	Gm14410:chr2:177195365-177195576:-	Gm14410:3	177195171	177195471		NA	177195171	177195771	265	NA	NA	163	NA	101	NA	NA	NA	NA	75105	NA	NA	FALSE	FALSE	NA	NA	TRUE	NA	TRUE	NA	NA	NA	NA	TRUE	NA	TRUE	NA	TRUE
177384486	Gm14418	chr2	-	177384301	177398319	1.77384e+08	62.983	1	177384301	177384674	373	Gm14418:chr2:177384301-177384674:-	Gm14418:1	177384301	177384486		NA	177384186	177384786	NA	NA	NA	NA	NA	31	NA	NA	NA	145	35	NA	NA	FALSE	NA	NA	NA	NA	NA	FALSE	NA	NA	NA	TRUE	FALSE	NA	TRUE	NA	TRUE
177386337	Gm14418	chr2	-	177384301	177398319	1.77386e+08	46.6702	1	177386186	177386466	280	Gm14418:chr2:177386186-177386466:-	Gm14418:2	177386037	177386337		NA	177386037	177386637	NA	NA	NA	80	63	NA	NA	36242	275	1	167263	48172	NA	FALSE	NA	NA	NA	FALSE	FALSE	NA	NA	FALSE	FALSE	FALSE	TRUE	TRUE	TRUE	NA	TRUE
177388328	Gm14418	chr2	-	177384301	177398319	177388328	27.5346	0.0674472	177388245	177388410	165	Gm14418:chr2:177388245-177388410:-	Gm14418:3	177388028	177388328	243	1	177388028	177388628	237	91	255	NA	NA	NA	NA	224	NA	NA	285	186	NA	FALSE	FALSE	TRUE	FALSE	NA	NA	NA	NA	FALSE	NA	NA	FALSE	FALSE	TRUE	NA	TRUE
177388404	Gm14418	chr2	-	177384301	177398319	177388404	76.9744	0.229256	177388173	177388634	461	Gm14418:chr2:177388173-177388634:-	Gm14418:3	177388104	177388404		NA	177388104	177388704	NA	167	NA	NA	NA	NA	NA	NA	NA	NA	NA	74262	NA	FALSE	NA	TRUE	NA	NA	NA	NA	NA	NA	NA	NA	NA	FALSE	TRUE	NA	TRUE
177388466	Gm14418	chr2	-	177384301	177398319	177388466	123.492	0.063097	177388095	177388836	741	Gm14418:chr2:177388095-177388836:-	Gm14418:3	177388166	177388466		NA	177388166	177388766	NA	229	NA	NA	NA	NA	NA	NA	NA	NA	NA	136	NA	FALSE	NA	FALSE	NA	NA	NA	NA	NA	NA	NA	NA	NA	TRUE	TRUE	NA	TRUE
177010933	Gm14419	chr2	+	177000956	177031239	1.77011e+08	44.6504	0.850455	177010792	177011059	267	Gm14419:chr2:177010792-177011059:+	Gm14419:2	177010933	177011233	51	1	177010633	177011233	215	69159	233	NA	NA	NA	NA	202	157	NA	263	163	NA	FALSE	FALSE	TRUE	FALSE	NA	NA	NA	NA	FALSE	TRUE	NA	FALSE	TRUE	TRUE	NA	TRUE
177022262	Gm14419	chr2	+	177000956	177031239	1.77022e+08	36.1569	1	177022138	177022355	217	Gm14419:chr2:177022138-177022355:+	Gm14419:4	177022262	177022562		NA	177021962	177022562	17	NA	NA	NA	NA	NA	NA	NA	NA	6166	62	NA	NA	FALSE	FALSE	NA	NA	NA	NA	NA	NA	NA	NA	TRUE	FALSE	NA	TRUE	NA	TRUE
176470576	Gm14434	chr2	-	176454656	176486773	1.76471e+08	36.0875	1	176470458	176470675	217	Gm14434:chr2:176470458-176470675:-	Gm14434:1	176470276	176470576		NA	176470276	176470876	211	NA	NA	NA	NA	NA	NA	186	NA	67178194	182190	NA	NA	FALSE	FALSE	NA	NA	NA	NA	NA	NA	FALSE	NA	TRUE	FALSE	NA	TRUE	NA	TRUE
176474907	Gm14434	chr2	-	176454656	176486773	176474907	111.184	0.261725	176474573	176475240	667	Gm14434:chr2:176474573-176475240:-	Gm14434:2	176474607	176474907	277	1	176474607	176475207	242	95186	260	NA	NA	NA	NA	229	184	NA	290	1190	NA	FALSE	FALSE	TRUE	FALSE	NA	NA	NA	NA	FALSE	FALSE	NA	FALSE	FALSE	TRUE	NA	TRUE
176475023	Gm14434	chr2	-	176454656	176486773	176475023	44.7564	0.339532	176474888	176475157	269	Gm14434:chr2:176474888-176475157:-	Gm14434:2	176474723	176475023		NA	176474723	176475323	NA	211	NA	NA	NA	NA	NA	NA	NA	NA	NA	117	NA	FALSE	NA	FALSE	NA	NA	NA	NA	NA	NA	NA	NA	NA	TRUE	TRUE	NA	TRUE
176475775	Gm14434	chr2	-	176454656	176486773	176475775	57.3922	0.0378812	176475602	176475947	345	Gm14434:chr2:176475602-176475947:-	Gm14434:2	176475475	176475775	264	1	176475475	176476075	264	NA	NA	162	NA	100	NA	NA	NA	NA	74104	NA	NA	FALSE	FALSE	NA	NA	TRUE	NA	TRUE	NA	NA	NA	NA	TRUE	NA	TRUE	NA	TRUE
175284407	Gm14440	chr2	+	175275125	175292085	1.75284e+08	33.3273	0.0850995	175284261	175284461	200	Gm14440:chr2:175284261-175284461:+	Gm14440:1	175284407	175284707		NA	175284107	175284707	NA	209	NA	NA	NA	NA	NA	NA	NA	NA	NA	116	NA	FALSE	NA	FALSE	NA	NA	NA	NA	NA	NA	NA	NA	NA	TRUE	TRUE	NA	TRUE
175284498	Gm14440	chr2	+	175275125	175292085	1.75284e+08	97.7631	0.903228	175284177	175284764	587	Gm14440:chr2:175284177-175284764:+	Gm14440:1	175284498	175284798		NA	175284198	175284798	264	118	282	NA	NA	NA	NA	251	NA	NA	NA	25212	NA	FALSE	FALSE	TRUE	FALSE	NA	NA	NA	NA	FALSE	NA	NA	NA	FALSE	TRUE	NA	TRUE
175284639	Gm14440	chr2	+	175275125	175292085	1.75285e+08	25.016	0.0116725	175284821	175284971	150	Gm14440:chr2:175284821-175284971:+	Gm14440:1	175284639	175284939		NA	175284339	175284939	123	NA	141	NA	NA	NA	NA	110	NA	NA	NA	71	NA	FALSE	TRUE	NA	TRUE	NA	NA	NA	NA	TRUE	NA	NA	NA	FALSE	TRUE	NA	TRUE
175290513	Gm14440	chr2	+	175275125	175292085	1.7529e+08	55.2836	0.79087	175290326	175290658	332	Gm14440:chr2:175290326-175290658:+	Gm14440:2	175290513	175290813		NA	175290213	175290813	212	NA	NA	NA	132	185	NA	NA	NA	239	NA	NA	NA	FALSE	FALSE	NA	NA	NA	TRUE	FALSE	NA	NA	NA	FALSE	NA	NA	TRUE	NA	TRUE
175291322	Gm14440	chr2	+	175275125	175292085	1.75291e+08	139.767	1	175290818	175291657	839	Gm14440:chr2:175290818-175291657:+	Gm14440:3	175291322	175291622	25	1	175291022	175291622	NA	NA	NA	NA	100	112	NA	NA	NA	5119	124128289	NA	NA	FALSE	NA	NA	NA	NA	TRUE	TRUE	NA	NA	NA	TRUE	TRUE	NA	TRUE	NA	TRUE
109940787	Gm15446	chr5	+	109923400	109945632	109940787	34.849	0.832645	109940682	109940891	209	Gm15446:chr5:109940682-109940891:+	Gm15446:2	109940787	109941087	17	1	109940487	109941087	77183	NA	NA	NA	133	NA	NA	NA	NA	NA	52,82	NA	97,98	FALSE	FALSE	NA	NA	NA	TRUE	NA	NA	NA	NA	NA	FALSE	NA	TRUE	FALSE	TRUE
7186239	Gm16434	chr14	-	7185927	7194540	7.18618e+06	10.7595	0.0301764	7186151	7186216	65	Gm16434:chr14:7186151-7186216:-	Gm16434:1	7185939	7186239		NA	7185939	7186539	NA	293	NA	NA	50	NA	NA	NA	125	75158	NA	NA	NA	FALSE	NA	FALSE	NA	NA	FALSE	NA	NA	NA	TRUE	TRUE	NA	NA	TRUE	NA	TRUE
7186303	Gm16434	chr14	-	7185927	7194540	7.18623e+06	30.3439	0.332501	7186140	7186322	182	Gm16434:chr14:7186140-7186322:-	Gm16434:1	7186003	7186303		NA	7186003	7186603	NA	NA	NA	NA	114	NA	NA	NA	189	139222	NA	NA	NA	FALSE	NA	NA	NA	NA	TRUE	NA	NA	NA	FALSE	TRUE	NA	NA	TRUE	NA	TRUE
7186359	Gm16434	chr14	-	7185927	7194540	7.18634e+06	48.2898	0.637323	7186199	7186489	290	Gm16434:chr14:7186199-7186489:-	Gm16434:1	7186059	7186359		NA	7186059	7186659	NA	NA	NA	NA	170	NA	NA	NA	245	195278	NA	NA	NA	FALSE	NA	NA	NA	NA	TRUE	NA	NA	NA	FALSE	FALSE	NA	NA	TRUE	NA	TRUE
175748918	Gm2007	chr2	+	175741537	175770089	175748918	52.9865	0.0404629	175748759	175749076	317	Gm2007:chr2:175748759-175749076:+	Gm2007:1	175748918	175749218	42	1	175748618	175749218	268	NA	NA	166	NA	104	NA	NA	NA	NA	78108	NA	NA	FALSE	FALSE	NA	NA	TRUE	NA	TRUE	NA	NA	NA	NA	TRUE	NA	TRUE	NA	TRUE
175752189	Gm2007	chr2	+	175741537	175770089	1.75752e+08	35.2633	1	175752064	175752276	212	Gm2007:chr2:175752064-175752276:+	Gm2007:2	175752189	175752489		NA	175751889	175752489	NA	NA	NA	101	84	18	NA	57262	295	22283	188	193203	NA	FALSE	NA	NA	NA	TRUE	FALSE	FALSE	NA	FALSE	FALSE	FALSE	FALSE	FALSE	TRUE	NA	TRUE
175753574	Gm2007	chr2	+	175741537	175770089	1.75754e+08	73.6828	0.112164	175753333	175753775	442	Gm2007:chr2:175753333-175753775:+	Gm2007:3	175753574	175753874		NA	175753274	175753874	151	NA	NA	NA	NA	NA	NA	NA	NA	NA	223	NA	NA	FALSE	TRUE	NA	NA	NA	NA	NA	NA	NA	NA	NA	FALSE	NA	TRUE	NA	TRUE
175754142	Gm2007	chr2	+	175741537	175770089	1.75754e+08	51.9459	0.887836	175753978	175754290	312	Gm2007:chr2:175753978-175754290:+	Gm2007:3	175754142	175754442		NA	175753842	175754442	190	NA	NA	NA	NA	NA	NA	165	NA	46157173	161169	NA	NA	FALSE	FALSE	NA	NA	NA	NA	NA	NA	TRUE	NA	TRUE	TRUE	NA	TRUE	NA	TRUE
175760067	Gm2007	chr2	+	175741537	175770089	1.7576e+08	27.8183	0.24483	175759969	175760136	167	Gm2007:chr2:175759969-175760136:+	Gm2007:4	175760067	175760367		NA	175759767	175760367	NA	NA	103212	NA	NA	NA	NA	160	NA	NA	272	NA	NA	FALSE	NA	NA	TRUE	NA	NA	NA	NA	TRUE	NA	NA	FALSE	NA	TRUE	NA	TRUE
175761952	Gm2007	chr2	+	175741537	175770089	1.75762e+08	60.5099	1	175761777	175762140	363	Gm2007:chr2:175761777-175762140:+	Gm2007:5	175761952	175762252		NA	175761652	175762252	171	NA	NA	NA	NA	NA	141	39181	NA	177	147	NA	NA	FALSE	TRUE	NA	NA	NA	NA	NA	TRUE	FALSE	NA	TRUE	TRUE	NA	TRUE	NA	TRUE
96080638	Gm20075	chr13	-	96079216	96081376	9.60806e+07	59.107	0.736561	96080449	96080804	355	Gm20075:chr13:96080449-96080804:-	Gm20075:2	96080338	96080638		NA	96080338	96080938	NA	NA	NA	NA	NA	NA	NA	NA	NA	161	NA	200	NA	FALSE	NA	NA	NA	NA	NA	NA	NA	NA	NA	TRUE	NA	FALSE	TRUE	NA	TRUE
96080852	Gm20075	chr13	-	96079216	96081376	9.60808e+07	123.768	0.263439	96080397	96081140	743	Gm20075:chr13:96080397-96081140:-	Gm20075:2	96080552	96080852		NA	96080552	96081152	NA	105	NA	NA	NA	NA	NA	NA	103	NA	NA	NA	NA	FALSE	NA	TRUE	NA	NA	NA	NA	NA	NA	TRUE	NA	NA	NA	TRUE	NA	TRUE
175976324	Gm2026	chr2	+	175965331	175987279	175976324	55.41	0.0349847	175976157	175976490	333	Gm2026:chr2:175976157-175976490:+	Gm2026:1	175976324	175976624		NA	175976024	175976624	267	NA	NA	165	NA	103	NA	NA	NA	NA	77107	NA	NA	FALSE	FALSE	NA	NA	TRUE	NA	TRUE	NA	NA	NA	NA	TRUE	NA	TRUE	NA	TRUE
175977058	Gm2026	chr2	+	175965331	175987279	175977058	39.4008	0.323317	175976939	175977176	237	Gm2026:chr2:175976939-175977176:+	Gm2026:1	175977058	175977358		NA	175976758	175977358	NA	232	NA	NA	NA	NA	NA	NA	NA	NA	NA	138	NA	FALSE	NA	FALSE	NA	NA	NA	NA	NA	NA	NA	NA	NA	TRUE	TRUE	NA	TRUE
175977196	Gm2026	chr2	+	175965331	175987279	175977196	102.013	0.324854	175976889	175977502	613	Gm2026:chr2:175976889-175977502:+	Gm2026:1	175977196	175977496		NA	175976896	175977496	241	94185	259	NA	NA	NA	NA	228	183	NA	289	189	NA	FALSE	FALSE	TRUE	FALSE	NA	NA	NA	NA	FALSE	FALSE	NA	FALSE	FALSE	TRUE	NA	TRUE
175977304	Gm2026	chr2	+	175965331	175987279	175977304	44.0478	0.191724	175977171	175977436	265	Gm2026:chr2:175977171-175977436:+	Gm2026:1	175977304	175977604		NA	175977004	175977604	133	77	151	NA	NA	NA	NA	120	75	NA	181	81	NA	FALSE	TRUE	FALSE	TRUE	NA	NA	NA	NA	TRUE	FALSE	NA	FALSE	FALSE	TRUE	NA	TRUE
81472166	Gm20498	chr12	-	81358853	81532905	8.1472e+07	51.9324	0.0639522	81471809	81472120	311	Gm20498:chr12:81471809-81472120:-	Gm20498:3	81471866	81472166	205,71,205,71,205,71	6	81471866	81472466	NA	167	NA	NA	56	NA	NA	102	NA	NA	NA	NA	NA	FALSE	NA	TRUE	NA	NA	FALSE	NA	NA	TRUE	NA	NA	NA	NA	TRUE	NA	TRUE
117838851	Gm20708	chr11	+	117809668	117840332	1.17839e+08	56.9789	1	117838675	117839017	342	Gm20708:chr11:117838675-117839017:+	Gm20708:5	117838851	117839151		NA	117838551	117839151	NA	NA	NA	NA	NA	NA	NA	58	NA	NA	54178182	NA	NA	FALSE	NA	NA	NA	NA	NA	NA	NA	FALSE	NA	NA	TRUE	NA	TRUE	NA	TRUE
117839802	Gm20708	chr11	+	117809668	117840332	1.1784e+08	63.5721	0.905191	117839533	117839915	382	Gm20708:chr11:117839533-117839915:+	Gm20708:6	117839802	117840102	104104	2	117839502	117840102	NA	NA	NA	NA	82	NA	NA	NA	142	NA	NA	NA	NA	FALSE	NA	NA	NA	NA	FALSE	NA	NA	NA	TRUE	NA	NA	NA	TRUE	NA	TRUE
38349309	Gm21987	chr16	+	38347040	38362297	3.83493e+07	28.201	1	38349209	38349378	169	Gm21987:chr16:38349209-38349378:+	Gm21987:2	38349309	38349609	20,20,20	3	38349009	38349609	NA	213	NA	NA	NA	NA	NA	NA	115	NA	NA	NA	NA	FALSE	NA	FALSE	NA	NA	NA	NA	NA	NA	TRUE	NA	NA	NA	TRUE	NA	TRUE
19563916	Gm2237	chr14	-	19563798	19585135	1.95639e+07	33.2776	0.421569	19563798	19563994	196	Gm2237:chr14:19563798-19563994:-	Gm2237:1	19563798	19563916	109	1	19563616	19564216	NA	NA	NA	NA	70	NA	NA	NA	NA	95	NA	NA	NA	FALSE	NA	NA	NA	NA	FALSE	NA	NA	NA	NA	TRUE	NA	NA	TRUE	NA	TRUE
19533401	Gm2244	chr14	-	19532896	19549963	1.95334e+07	43.5234	1	19533260	19533521	261	Gm2244:chr14:19533260-19533521:-	Gm2244:1	19533101	19533401		NA	19533101	19533701	NA	NA	NA	NA	NA	NA	NA	NA	NA	87123	95	99	NA	FALSE	NA	NA	NA	NA	NA	NA	NA	NA	NA	TRUE	TRUE	TRUE	TRUE	NA	TRUE
103482624	Gm26992	chrX	+	103422010	103483388	1.03483e+08	26.1262	0.360437	103482524	103482680	156	Gm26992:chrX:103482524-103482680:+	Gm26992:4	103482624	103482924		NA	103482324	103482924	NA	284	NA	NA	NA	NA	11	193291	280	127	116180296	NA	NA	FALSE	NA	FALSE	NA	NA	NA	NA	FALSE	FALSE	FALSE	TRUE	TRUE	NA	TRUE	NA	TRUE
103482790	Gm26992	chrX	+	103422010	103483388	1.03483e+08	11.3951	0.0233762	103482642	103482710	68	Gm26992:chrX:103482642-103482710:+	Gm26992:4	103482790	103483090		NA	103482490	103483090	NA	118	NA	NA	NA	NA	NA	27125199	114	NA	14130182	178	NA	FALSE	NA	TRUE	NA	NA	NA	NA	NA	TRUE	TRUE	NA	TRUE	TRUE	TRUE	NA	TRUE
103482873	Gm26992	chrX	+	103422010	103483388	1.03483e+08	99.6319	0.217485	103482577	103483175	598	Gm26992:chrX:103482577-103483175:+	Gm26992:4	103482873	103483173		NA	103482573	103483173	NA	35	NA	NA	NA	NA	267	42116	31	NA	47,99	95	NA	FALSE	NA	FALSE	NA	NA	NA	NA	FALSE	TRUE	FALSE	NA	TRUE	TRUE	TRUE	NA	TRUE
103482981	Gm26992	chrX	+	103422010	103483388	1.03483e+08	122.253	0.0446412	103482587	103483320	733	Gm26992:chrX:103482587-103483320:+	Gm26992:4	103482981	103483281		NA	103482681	103483281	NA	NA	NA	NA	NA	NA	159	8	NA	NA	NA	NA	NA	FALSE	NA	NA	NA	NA	NA	NA	TRUE	FALSE	NA	NA	NA	NA	TRUE	NA	TRUE
58028624	Gm29394	chr15	-	58028243	58076425	58028624	62.9217	0.744502	58028435	58028812	377	Gm29394:chr15:58028435-58028812:-	Gm29394:1	58028324	58028624	91	1	58028324	58028924	102	NA	NA	NA	NA	NA	NA	NA	NA	106	NA	NA	NA	FALSE	TRUE	NA	NA	NA	NA	NA	NA	NA	NA	TRUE	NA	NA	TRUE	NA	TRUE
81743062	Gm3055	chr10	-	81742437	81771142	8.1743e+07	146.27	0.581844	81742581	81743459	878	Gm3055:chr10:81742581-81743459:-	Gm3055:1	81742762	81743062	241	1	81742762	81743362	175	NA	NA	NA	NA	NA	NA	NA	NA	222	NA	NA	NA	FALSE	TRUE	NA	NA	NA	NA	NA	NA	NA	NA	FALSE	NA	NA	TRUE	NA	TRUE
81744266	Gm3055	chr10	-	81742437	81771142	8.17443e+07	65.1758	0.559352	81744076	81744467	391	Gm3055:chr10:81744076-81744467:-	Gm3055:2	81743966	81744266		NA	81743966	81744566	NA	NA	NA	NA	NA	NA	NA	250	NA	144213	240	NA	NA	FALSE	NA	NA	NA	NA	NA	NA	NA	FALSE	NA	TRUE	FALSE	NA	TRUE	NA	TRUE
81744456	Gm3055	chr10	-	81742437	81771142	8.1744e+07	21.2009	0.00790978	81743938	81744065	127	Gm3055:chr10:81743938-81744065:-	Gm3055:2	81744156	81744456		NA	81744156	81744756	NA	NA	NA	NA	NA	NA	178	NA	NA	37	NA	NA	NA	FALSE	NA	NA	NA	NA	NA	NA	TRUE	NA	NA	FALSE	NA	NA	TRUE	NA	TRUE
4006583	Gm3099	chr14	+	3998394	4007006	4.00696e+06	23.0917	0.00391818	4006893	4007006	113	Gm3099:chr14:4006893-4007006:+	Gm3099:1	4006583	4006883		NA	4006283	4006883	NA	NA	NA	NA	162	NA	NA	NA	237	187270	NA	NA	NA	FALSE	NA	NA	NA	NA	TRUE	NA	NA	NA	FALSE	FALSE	NA	NA	TRUE	NA	TRUE
4006702	Gm3099	chr14	+	3998394	4007006	4.00668e+06	45.2658	0.996082	4006546	4006818	272	Gm3099:chr14:4006546-4006818:+	Gm3099:1	4006702	4007002		NA	4006402	4007002	NA	285	NA	NA	43	NA	NA	NA	118	68151	NA	296	NA	FALSE	NA	FALSE	NA	NA	FALSE	NA	NA	NA	TRUE	TRUE	NA	FALSE	TRUE	NA	TRUE
5939437	Gm3248	chr14	-	5939224	5961745	5.93943e+06	45.0043	1	5939291	5939561	270	Gm3248:chr14:5939291-5939561:-	Gm3248:1	5939224	5939437	211	1	5939137	5939737	NA	NA	NA	NA	167	NA	NA	NA	NA	192	NA	NA	NA	FALSE	NA	NA	NA	NA	TRUE	NA	NA	NA	NA	FALSE	NA	NA	TRUE	NA	TRUE
4876721	Gm3264	chr14	+	4855576	4876908	4.87678e+06	29.1039	0.417098	4876696	4876871	175	Gm3264:chr14:4876696-4876871:+	Gm3264:3	4876721	4876908		NA	4876421	4877021	NA	NA	NA	NA	142	NA	NA	NA	NA	167	NA	NA	NA	FALSE	NA	NA	NA	NA	TRUE	NA	NA	NA	NA	TRUE	NA	NA	TRUE	NA	TRUE
4876790	Gm3264	chr14	+	4855576	4876908	4.87685e+06	23.9399	0.195401	4876773	4876908	135	Gm3264:chr14:4876773-4876908:+	Gm3264:3	4876790	4876908		NA	4876490	4877090	NA	NA	NA	NA	73	NA	NA	NA	NA	98	NA	NA	NA	FALSE	NA	NA	NA	NA	FALSE	NA	NA	NA	NA	TRUE	NA	NA	TRUE	NA	TRUE
4901964	Gm3278	chr14	+	4892416	4902431	4.90195e+06	61.9606	0.518765	4901766	4902138	372	Gm3278:chr14:4901766-4902138:+	Gm3278:1	4901964	4902264		NA	4901664	4902264	NA	NA	NA	NA	NA	NA	NA	NA	NA	54,90	62	66	NA	FALSE	NA	NA	NA	NA	NA	NA	NA	NA	NA	TRUE	FALSE	FALSE	TRUE	NA	TRUE
5170099	Gm3317	chr14	+	5164535	5170292	5.17007e+06	69.9857	0.442215	5169863	5170283	420	Gm3317:chr14:5169863-5170283:+	Gm3317:1	5170099	5170292		NA	5169799	5170399	NA	NA	NA	NA	146	NA	NA	NA	NA	171	NA	NA	NA	FALSE	NA	NA	NA	NA	TRUE	NA	NA	NA	NA	TRUE	NA	NA	TRUE	NA	TRUE
5170166	Gm3317	chr14	+	5164535	5170292	5.17014e+06	32.9577	0.411436	5170039	5170236	197	Gm3317:chr14:5170039-5170236:+	Gm3317:1	5170166	5170292		NA	5169866	5170466	NA	NA	NA	NA	79	NA	NA	NA	NA	104	NA	NA	NA	FALSE	NA	NA	NA	NA	FALSE	NA	NA	NA	NA	TRUE	NA	NA	TRUE	NA	TRUE
6260093	Gm3411	chr14	-	6259747	6287250	6.2602e+06	73.3099	0.416363	6259980	6260420	440	Gm3411:chr14:6259980-6260420:-	Gm3411:1	6259793	6260093		NA	6259793	6260393	NA	NA	NA	NA	118	NA	NA	NA	193	143	NA	NA	NA	FALSE	NA	NA	NA	NA	TRUE	NA	NA	NA	FALSE	TRUE	NA	NA	TRUE	NA	TRUE
5326587	Gm3542	chr14	-	5326255	5334928	5.3266e+06	34.8748	0.161022	5326499	5326709	210	Gm3542:chr14:5326499-5326709:-	Gm3542:1	5326287	5326587		NA	5326287	5326887	NA	NA	NA	NA	70	NA	NA	NA	145	95178	NA	NA	NA	FALSE	NA	NA	NA	NA	FALSE	NA	NA	NA	TRUE	TRUE	NA	NA	TRUE	NA	TRUE
7545774	Gm3558	chr14	-	7545151	7568566	7.54577e+06	66.7294	0.222581	7545570	7545970	400	Gm3558:chr14:7545570-7545970:-	Gm3558:1	7545474	7545774		NA	7545474	7546074	155	NA	NA	NA	NA	NA	NA	NA	NA	NA	NA	NA	NA	FALSE	TRUE	NA	NA	NA	NA	NA	NA	NA	NA	NA	NA	NA	TRUE	NA	TRUE
7441447	Gm3755	chr14	-	7440924	7450917	7.44148e+06	78.6499	0.502942	7441247	7441719	472	Gm3755:chr14:7441247-7441719:-	Gm3755:1	7441147	7441447		NA	7441147	7441747	NA	NA	NA	NA	NA	NA	NA	NA	NA	70106	78	82	NA	FALSE	NA	NA	NA	NA	NA	NA	NA	NA	NA	TRUE	FALSE	FALSE	TRUE	NA	TRUE
133622125	Gm38394	chr1	-	133619940	133661318	1.33622e+08	39.3074	0.0348532	133622034	133622270	236	Gm38394:chr1:133622034-133622270:-	Gm38394:2	133621825	133622125	8	1	133621825	133622425	NA	NA	NA	NA	NA	NA	NA	153	NA	NA	NA	NA	NA	FALSE	NA	NA	NA	NA	NA	NA	NA	TRUE	NA	NA	NA	NA	TRUE	NA	TRUE
133638937	Gm38394	chr1	-	133619940	133661318	1.33639e+08	55.1295	0.434299	133638737	133639068	331	Gm38394:chr1:133638737-133639068:-	Gm38394:4	133638637	133638937	104	1	133638637	133639237	95	NA	NA	NA	NA	NA	NA	NA	NA	NA	278	NA	NA	FALSE	TRUE	NA	NA	NA	NA	NA	NA	NA	NA	NA	FALSE	NA	TRUE	NA	TRUE
133647354	Gm38394	chr1	-	133619940	133661318	1.33647e+08	71.1438	1	133647168	133647595	427	Gm38394:chr1:133647168-133647595:-	Gm38394:5	133647054	133647354	18	1	133647054	133647654	NA	NA	NA	NA	NA	139	34	NA	NA	NA	NA	NA	NA	FALSE	NA	NA	NA	NA	NA	TRUE	FALSE	NA	NA	NA	NA	NA	TRUE	NA	TRUE
105216898	Gm43302	chr5	-	105214907	105293695	1.05217e+08	67.556	1	105216685	105217090	405	Gm43302:chr5:105216685-105217090:-	Gm43302:1	105216598	105216898		NA	105216598	105217198	NA	NA	267	NA	NA	NA	249	161	NA	NA	203	42207	NA	FALSE	NA	NA	FALSE	NA	NA	NA	FALSE	TRUE	NA	NA	FALSE	FALSE	TRUE	NA	TRUE
49392610	Gm43517	chr12	+	49385174	49394127	4.93926e+07	84.4756	0.42736	49392346	49392853	507	Gm43517:chr12:49392346-49392853:+	Gm43517:3	49392610	49392910	213	1	49392310	49392910	NA	191	NA	NA	NA	NA	NA	NA	NA	NA	165	NA	NA	FALSE	NA	FALSE	NA	NA	NA	NA	NA	NA	NA	NA	TRUE	NA	TRUE	NA	TRUE
49393257	Gm43517	chr12	+	49385174	49394127	4.93933e+07	113.586	0.353681	49392941	49393623	682	Gm43517:chr12:49392941-49393623:+	Gm43517:3	49393257	49393557	266	1	49392957	49393557	164	NA	NA	NA	44	244	NA	58	NA	NA	NA	NA	NA	FALSE	TRUE	NA	NA	NA	FALSE	FALSE	NA	FALSE	NA	NA	NA	NA	TRUE	NA	TRUE
28726594	Gm4356	chr17	+	28726083	28726700	2.87266e+07	34.0875	0.292361	28726516	28726700	184	Gm4356:chr17:28726516-28726700:+	Gm4356:1	28726594	28726700	106	1	28726294	28726894	NA	NA	NA	NA	NA	NA	NA	NA	NA	97	NA	NA	NA	FALSE	NA	NA	NA	NA	NA	NA	NA	NA	NA	TRUE	NA	NA	TRUE	NA	TRUE
90591709	Gm45871	chr18	+	90579777	90597353	9.05917e+07	133.009	0.130775	90591350	90592148	798	Gm45871:chr18:90591350-90592148:+	Gm45871:2	90591709	90592009		NA	90591409	90592009	NA	NA	99	51135	NA	NA	NA	258	NA	NA	NA	NA	NA	FALSE	NA	NA	TRUE	TRUE	NA	NA	NA	FALSE	NA	NA	NA	NA	TRUE	NA	TRUE
175314169	Gm4631	chr2	-	175306073	175338197	1.75314e+08	58.6644	1	175314011	175314363	352	Gm4631:chr2:175314011-175314363:-	Gm4631:1	175313869	175314169		NA	175313869	175314469	130	NA	NA	NA	NA	NA	100	140	NA	136	106	NA	NA	FALSE	TRUE	NA	NA	NA	NA	NA	TRUE	TRUE	NA	TRUE	TRUE	NA	TRUE	NA	TRUE
175316092	Gm4631	chr2	-	175306073	175338197	1.75316e+08	89.8072	0.806523	175315932	175316471	539	Gm4631:chr2:175315932-175316471:-	Gm4631:2	175315792	175316092		NA	175315792	175316392	NA	NA	100209	NA	NA	NA	NA	157	NA	NA	269	NA	NA	FALSE	NA	NA	TRUE	NA	NA	NA	NA	TRUE	NA	NA	FALSE	NA	TRUE	NA	TRUE
175322041	Gm4631	chr2	-	175306073	175338197	1.75322e+08	52.5839	0.883767	175321865	175322180	315	Gm4631:chr2:175321865-175322180:-	Gm4631:3	175321741	175322041	86	1	175321741	175322341	211	NA	NA	NA	NA	NA	NA	186	NA	67178194	182190	NA	NA	FALSE	FALSE	NA	NA	NA	NA	NA	NA	FALSE	NA	TRUE	FALSE	NA	TRUE	NA	TRUE
175322584	Gm4631	chr2	-	175306073	175338197	1.75323e+08	73.906	0.116233	175322380	175322824	444	Gm4631:chr2:175322380-175322824:-	Gm4631:3	175322284	175322584		NA	175322284	175322884	147	NA	NA	NA	NA	NA	NA	NA	NA	NA	219	NA	NA	FALSE	TRUE	NA	NA	NA	NA	NA	NA	NA	NA	NA	FALSE	NA	TRUE	NA	TRUE
175323318	Gm4631	chr2	-	175306073	175338197	1.75323e+08	41.4702	1	175323204	175323453	249	Gm4631:chr2:175323204-175323453:-	Gm4631:4	175323018	175323318		NA	175323018	175323618	NA	NA	NA	NA	134	NA	NA	NA	NA	NA	289	NA	NA	FALSE	NA	NA	NA	NA	TRUE	NA	NA	NA	NA	NA	FALSE	NA	TRUE	NA	TRUE
175324016	Gm4631	chr2	-	175306073	175338197	1.75324e+08	35.245	1	175323884	175324096	212	Gm4631:chr2:175323884-175324096:-	Gm4631:5	175323716	175324016		NA	175323716	175324316	NA	NA	NA	144	127	61	NA	100	15	65	231	236246	NA	FALSE	NA	NA	NA	TRUE	TRUE	FALSE	NA	TRUE	FALSE	FALSE	FALSE	FALSE	TRUE	NA	TRUE
71458351	Gm4707	chr17	-	71458168	71459300	7.14584e+07	67.3624	0.188556	71458168	71458555	387	Gm4707:chr17:71458168-71458555:-	Gm4707:1	71458168	71458351		NA	71458051	71458651	143	NA	NA	NA	NA	NA	NA	NA	NA	155	NA	NA	NA	FALSE	TRUE	NA	NA	NA	NA	NA	NA	NA	NA	TRUE	NA	NA	TRUE	NA	TRUE
175419577	Gm4724	chr2	-	175403643	175435782	1.7542e+08	36.1834	1	175419480	175419697	217	Gm4724:chr2:175419480-175419697:-	Gm4724:1	175419277	175419577		NA	175419277	175419877	190	NA	NA	NA	NA	NA	NA	165	NA	46157173	161169	NA	NA	FALSE	FALSE	NA	NA	NA	NA	NA	NA	TRUE	NA	TRUE	TRUE	NA	TRUE	NA	TRUE
175423929	Gm4724	chr2	-	175403643	175435782	175423929	111.31	0.261292	175423595	175424262	667	Gm4724:chr2:175423595-175424262:-	Gm4724:2	175423629	175423929	36	1	175423629	175424229	242	95186	260	NA	NA	NA	NA	229	184	NA	290	1190	NA	FALSE	FALSE	TRUE	FALSE	NA	NA	NA	NA	FALSE	FALSE	NA	FALSE	FALSE	TRUE	NA	TRUE
175424797	Gm4724	chr2	-	175403643	175435782	175424797	59.2092	0.0395288	175424619	175424974	355	Gm4724:chr2:175424619-175424974:-	Gm4724:2	175424497	175424797		NA	175424497	175425097	264	NA	NA	162	NA	100	NA	NA	NA	NA	74104	NA	NA	FALSE	FALSE	NA	NA	TRUE	NA	TRUE	NA	NA	NA	NA	TRUE	NA	TRUE	NA	TRUE
81823366	Gm4767	chr10	+	81812186	81826490	8.18235e+07	31.1065	0.0402776	81823359	81823545	186	Gm4767:chr10:81823359-81823545:+	Gm4767:2	81823366	81823666		NA	81823066	81823666	NA	NA	NA	NA	22191240	153	NA	NA	NA	NA	NA	NA	NA	FALSE	NA	NA	NA	NA	FALSE	TRUE	NA	NA	NA	NA	NA	NA	TRUE	NA	TRUE
81823472	Gm4767	chr10	+	81812186	81826490	8.18235e+07	49.8918	0.0849931	81823350	81823649	299	Gm4767:chr10:81823350-81823649:+	Gm4767:2	81823472	81823772		NA	81823172	81823772	NA	NA	NA	NA	85134	47	NA	NA	NA	NA	NA	NA	NA	FALSE	NA	NA	NA	NA	TRUE	FALSE	NA	NA	NA	NA	NA	NA	TRUE	NA	TRUE
81823706	Gm4767	chr10	+	81812186	81826490	8.18237e+07	64.2404	0.716683	81823520	81823906	386	Gm4767:chr10:81823520-81823906:+	Gm4767:2	81823706	81824006		NA	81823406	81824006	126	NA	NA	NA	NA	NA	NA	192	NA	110114118175	NA	NA	NA	FALSE	TRUE	NA	NA	NA	NA	NA	NA	FALSE	NA	TRUE	NA	NA	TRUE	NA	TRUE
81825726	Gm4767	chr10	+	81812186	81826490	8.18257e+07	63.8359	1	81825531	81825914	383	Gm4767:chr10:81825531-81825914:+	Gm4767:3	81825726	81826026		NA	81825426	81826026	NA	NA	NA	NA	NA	NA	NA	NA	NA	141	NA	NA	NA	FALSE	NA	NA	NA	NA	NA	NA	NA	NA	NA	TRUE	NA	NA	TRUE	NA	TRUE
123511890	Gm49027	chr5	-	123511736	123525429	1.23512e+08	54.8546	0.172801	123511736	123512031	295	Gm49027:chr5:123511736-123512031:-	Gm49027:1	123511736	123511890		NA	123511590	123512190	NA	NA	NA	NA	133	NA	NA	NA	NA	NA	NA	NA	NA	FALSE	NA	NA	NA	NA	TRUE	NA	NA	NA	NA	NA	NA	NA	TRUE	NA	TRUE
82383778	Gm4924	chr10	+	82354255	82405953	8.23838e+07	25.9969	1	82383717	82383873	156	Gm4924:chr10:82383717-82383873:+	Gm4924:7	82383778	82384078	66	1	82383478	82384078	NA	259	NA	NA	166	NA	NA	NA	NA	NA	NA	NA	NA	FALSE	NA	FALSE	NA	NA	TRUE	NA	NA	NA	NA	NA	NA	NA	TRUE	NA	TRUE
82400761	Gm4924	chr10	+	82354255	82405953	8.24008e+07	13.8913	1	82400726	82400809	83	Gm4924:chr10:82400726-82400809:+	Gm4924:8	82400761	82401061	85232	2	82400461	82401061	262	NA	NA	NA	NA	NA	NA	NA	NA	NA	95	NA	91,92,93	FALSE	FALSE	NA	NA	NA	NA	NA	NA	NA	NA	NA	TRUE	NA	TRUE	FALSE	TRUE
29218072	Gm49353	chr10	+	29198954	29221940	2.92181e+07	57.0284	0.66788	29217924	29218266	342	Gm49353:chr10:29217924-29218266:+	Gm49353:3	29218072	29218372	47224	2	29217772	29218372	242	NA	NA	NA	NA	NA	NA	NA	NA	NA	174	NA	NA	FALSE	FALSE	NA	NA	NA	NA	NA	NA	NA	NA	NA	TRUE	NA	TRUE	NA	TRUE
29218263	Gm49353	chr10	+	29198954	29221940	2.92183e+07	27.1515	0.33212	29218171	29218334	163	Gm49353:chr10:29218171-29218334:+	Gm49353:3	29218263	29218563	33	1	29217963	29218563	51	NA	NA	NA	NA	NA	NA	246	NA	147	143	173	NA	FALSE	FALSE	NA	NA	NA	NA	NA	NA	FALSE	NA	TRUE	TRUE	TRUE	TRUE	NA	TRUE
62453378	Gm49359	chr13	-	62449315	62466832	6.24529e+07	109.227	0.153918	62452535	62453191	656	Gm49359:chr13:62452535-62453191:-	Gm49359:1	62453078	62453378		NA	62453078	62453678	91	49	NA	NA	NA	NA	NA	NA	NA	NA	NA	NA	NA	FALSE	TRUE	FALSE	NA	NA	NA	NA	NA	NA	NA	NA	NA	NA	TRUE	NA	TRUE
62453473	Gm49359	chr13	-	62449315	62466832	6.24535e+07	139.838	0.101128	62453121	62453960	839	Gm49359:chr13:62453121-62453960:-	Gm49359:1	62453173	62453473		NA	62453173	62453773	186	144	NA	33	NA	NA	NA	NA	48	NA	NA	NA	NA	FALSE	FALSE	TRUE	NA	FALSE	NA	NA	NA	NA	FALSE	NA	NA	NA	TRUE	NA	TRUE
62454424	Gm49359	chr13	-	62449315	62466832	6.24545e+07	87.0993	0.0295418	62454196	62454719	523	Gm49359:chr13:62454196-62454719:-	Gm49359:1	62454124	62454424		NA	62454124	62454724	NA	NA	43127293	163	NA	NA	NA	NA	NA	NA	NA	NA	NA	FALSE	NA	NA	TRUE	TRUE	NA	NA	NA	NA	NA	NA	NA	NA	TRUE	NA	TRUE
142653614	Gm49394	chr7	-	142650764	142669942	1.42654e+08	91.9229	0.809744	142653411	142653962	551	Gm49394:chr7:142653411-142653962:-	Gm49394:2	142653314	142653614	242,88,53,242,88,53,53	7	142653314	142653914	80,98	NA	NA	NA	68147	NA	155183	NA	NA	NA	119159	104	NA	FALSE	TRUE	NA	NA	NA	TRUE	NA	TRUE	NA	NA	NA	TRUE	TRUE	TRUE	NA	TRUE
108698889	Gm5136	chr10	-	108698764	108700160	1.08699e+08	84.2495	1	108698764	108699172	408	Gm5136:chr10:108698764-108699172:-	Gm5136:1	108698764	108698889		NA	108698589	108699189	43	NA	NA	NA	23	64	NA	NA	109	NA	55	28	46,47,48,49,50,51,52	FALSE	FALSE	NA	NA	NA	FALSE	FALSE	NA	NA	TRUE	NA	FALSE	FALSE	TRUE	FALSE	TRUE
62773462	Gm5141	chr13	-	62771162	62785808	6.2773e+07	95.4563	0.396327	62772735	62773308	573	Gm5141:chr13:62772735-62773308:-	Gm5141:3	62773162	62773462		NA	62773162	62773762	NA	NA	NA	NA	NA	NA	NA	27250	NA	156	NA	NA	NA	FALSE	NA	NA	NA	NA	NA	NA	NA	FALSE	NA	TRUE	NA	NA	TRUE	NA	TRUE
93630188	Gm5678	chr16	+	93628097	93630451	9.36302e+07	30.0614	0.869405	93630081	93630261	180	Gm5678:chr16:93630081-93630261:+	Gm5678:1	93630188	93630451	263	1	93629888	93630488	NA	NA	136	NA	NA	NA	NA	NA	NA	240	NA	NA	NA	FALSE	NA	NA	TRUE	NA	NA	NA	NA	NA	NA	FALSE	NA	NA	TRUE	NA	TRUE
7117110	Gm6676	chr14	-	7116798	7125412	7.11706e+06	10.7595	0.0301764	7117022	7117087	65	Gm6676:chr14:7117022-7117087:-	Gm6676:1	7116810	7117110		NA	7116810	7117410	NA	293	NA	NA	50	NA	NA	NA	125	75158	NA	NA	NA	FALSE	NA	FALSE	NA	NA	FALSE	NA	NA	NA	TRUE	TRUE	NA	NA	TRUE	NA	TRUE
7117174	Gm6676	chr14	-	7116798	7125412	7.1171e+06	30.3439	0.332501	7117011	7117193	182	Gm6676:chr14:7117011-7117193:-	Gm6676:1	7116874	7117174		NA	7116874	7117474	NA	NA	NA	NA	114	NA	NA	NA	189	139222	NA	NA	NA	FALSE	NA	NA	NA	NA	TRUE	NA	NA	NA	FALSE	TRUE	NA	NA	TRUE	NA	TRUE
7117230	Gm6676	chr14	-	7116798	7125412	7.11722e+06	48.2898	0.637323	7117070	7117360	290	Gm6676:chr14:7117070-7117360:-	Gm6676:1	7116930	7117230		NA	7116930	7117530	NA	NA	NA	NA	170	NA	NA	NA	245	195278	NA	NA	NA	FALSE	NA	NA	NA	NA	TRUE	NA	NA	NA	FALSE	FALSE	NA	NA	TRUE	NA	TRUE
175878613	Gm6710	chr2	+	175869219	175899917	175878613	106.045	0.0804997	175878294	175878931	637	Gm6710:chr2:175878294-175878931:+	Gm6710:2	175878613	175878913		NA	175878313	175878913	234	NA	NA	132	NA	70	NA	NA	NA	NA	44,74	NA	NA	FALSE	FALSE	NA	NA	TRUE	NA	FALSE	NA	NA	NA	NA	FALSE	NA	TRUE	NA	TRUE
175879430	Gm6710	chr2	+	175869219	175899917	175879430	43.7951	0.641536	175879298	175879561	263	Gm6710:chr2:175879298-175879561:+	Gm6710:2	175879430	175879730	226	1	175879130	175879730	263	116207	281	NA	NA	NA	NA	250	205	NA	NA	22211	NA	FALSE	FALSE	TRUE	FALSE	NA	NA	NA	NA	FALSE	FALSE	NA	NA	FALSE	TRUE	NA	TRUE
175879588	Gm6710	chr2	+	175869219	175899917	175879588	169.748	0.121952	175879078	175880097	1019	Gm6710:chr2:175879078-175880097:+	Gm6710:2	175879588	175879888	68	1	175879288	175879888	105	49	123	NA	279	NA	NA	92	47	NA	153	53	NA	FALSE	TRUE	FALSE	TRUE	NA	FALSE	NA	NA	TRUE	FALSE	NA	TRUE	FALSE	TRUE	NA	TRUE
175883970	Gm6710	chr2	+	175869219	175899917	1.75884e+08	35.9957	1	175883847	175884063	216	Gm6710:chr2:175883847-175884063:+	Gm6710:3	175883970	175884270		NA	175883670	175884270	190	NA	NA	NA	NA	NA	NA	165	NA	46157173	161169	NA	NA	FALSE	FALSE	NA	NA	NA	NA	NA	NA	TRUE	NA	TRUE	TRUE	NA	TRUE	NA	TRUE
22286275	Gm7072	chr17	-	22282562	22314837	2.22863e+07	39.6399	0.0574031	22286161	22286399	238	Gm7072:chr17:22286161-22286399:-	Gm7072:1	22285975	22286275		NA	22285975	22286575	NA	42	NA	NA	NA	NA	NA	113	NA	NA	NA	NA	NA	FALSE	NA	FALSE	NA	NA	NA	NA	NA	TRUE	NA	NA	NA	NA	TRUE	NA	TRUE
43715019	Gm7324	chr14	+	43713732	43715378	4.3715e+07	64.4144	0.358172	43714812	43715198	386	Gm7324:chr14:43714812-43715198:+	Gm7324:1	43715019	43715319	234	1	43714719	43715319	157	NA	NA	NA	NA	210	132	NA	NA	NA	86137	52,90	NA	FALSE	TRUE	NA	NA	NA	NA	FALSE	TRUE	NA	NA	NA	TRUE	TRUE	TRUE	NA	TRUE
170298352	Gm7694	chr1	-	170298193	170306332	1.70298e+08	63.4479	1	170298193	170298548	355	Gm7694:chr1:170298193-170298548:-	Gm7694:1	170298193	170298352		NA	170298052	170298652	16	NA	145	NA	NA	NA	NA	NA	NA	137	NA	NA	NA	FALSE	FALSE	NA	TRUE	NA	NA	NA	NA	NA	NA	TRUE	NA	NA	TRUE	NA	TRUE
5858134	Gm8237	chr14	-	5857918	5880382	5.85821e+06	123.095	0.333172	5857918	5858574	656	Gm8237:chr14:5857918-5858574:-	Gm8237:1	5857918	5858134	216	1	5857834	5858434	NA	NA	NA	NA	171	NA	NA	NA	NA	196	NA	NA	NA	FALSE	NA	NA	NA	NA	TRUE	NA	NA	NA	NA	FALSE	NA	NA	TRUE	NA	TRUE
75937890	Gm867	chr10	-	75937700	75940611	7.59379e+07	84.3655	1	75937700	75938161	461	Gm867:chr10:75937700-75938161:-	Gm867:1	75937700	75937890		NA	75937590	75938190	NA	NA	NA	NA	NA	122154	NA	NA	NA	NA	NA	NA	NA	FALSE	NA	NA	NA	NA	NA	TRUE	NA	NA	NA	NA	NA	NA	TRUE	NA	TRUE
5575980	Gm8773	chr5	+	5573799	5576203	5.576e+06	96.453	1	5575713	5576203	490	Gm8773:chr5:5575713-5576203:+	Gm8773:1	5575980	5576203	223	1	5575680	5576280	20	99195	NA	NA	NA	NA	NA	NA	NA	199	114	24	NA	FALSE	FALSE	TRUE	NA	NA	NA	NA	NA	NA	NA	FALSE	TRUE	FALSE	TRUE	NA	TRUE
76495911	Gm9008	chr6	-	76495432	76497784	7.64959e+07	94.4344	0.116807	76495648	76496215	567	Gm9008:chr6:76495648-76496215:-	Gm9008:1	76495611	76495911		NA	76495611	76496211	123	NA	NA	NA	NA	NA	NA	NA	NA	NA	NA	NA	NA	FALSE	TRUE	NA	NA	NA	NA	NA	NA	NA	NA	NA	NA	NA	TRUE	NA	TRUE
4784659	Gm9602	chr14	+	4776337	4785002	4.78466e+06	30.3896	0.556051	4784568	4784751	183	Gm9602:chr14:4784568-4784751:+	Gm9602:1	4784659	4784959		NA	4784359	4784959	NA	NA	NA	NA	81	NA	NA	NA	NA	106189	NA	NA	NA	FALSE	NA	NA	NA	NA	FALSE	NA	NA	NA	NA	TRUE	NA	NA	TRUE	NA	TRUE
5679116	Gm9603	chr14	-	5678784	5687457	5.67913e+06	34.8748	0.161022	5679028	5679238	210	Gm9603:chr14:5679028-5679238:-	Gm9603:1	5678816	5679116		NA	5678816	5679416	NA	NA	NA	NA	70	NA	NA	NA	145	95178	NA	NA	NA	FALSE	NA	NA	NA	NA	FALSE	NA	NA	NA	TRUE	TRUE	NA	NA	TRUE	NA	TRUE
86720247	Gmcl1	chr6	-	86687822	86733383	8.67203e+07	67.3436	1	86720055	86720459	404	Gmcl1:chr6:86720055-86720459:-	Gmcl1:4	86719947	86720247	37	1	86719947	86720547	27	NA	NA	NA	NA	NA	NA	210	NA	15,19,176	160	164169	NA	FALSE	FALSE	NA	NA	NA	NA	NA	NA	FALSE	NA	TRUE	TRUE	TRUE	TRUE	NA	TRUE
64022340	Gmps	chr3	+	63976106	64022579	6.40221e+07	54.6844	0.321192	64021960	64022288	328	Gmps:chr3:64021960-64022288:+	Gmps:17	64022340	64022579	239	1	64022040	64022640	85	NA	NA	NA	106	NA	3	NA	NA	214	235	NA	NA	FALSE	FALSE	NA	NA	NA	TRUE	NA	FALSE	NA	NA	FALSE	FALSE	NA	TRUE	NA	TRUE
140758549	Gna12	chr5	-	140758407	140830431	1.40759e+08	72.7916	1	140758407	140758779	372	Gna12:chr5:140758407-140758779:-	Gna12:1	140758407	140758549	106	1	140758249	140758849	NA	NA	132	NA	107	NA	NA	NA	NA	111123	NA	NA	NA	FALSE	NA	NA	TRUE	NA	TRUE	NA	NA	NA	NA	TRUE	NA	NA	TRUE	NA	TRUE
16609736	Gna14	chr19	+	16435762	16610827	1.66097e+07	82.6715	1	16609460	16609956	496	Gna14:chr19:16609460-16609956:+	Gna14:2	16609736	16610036	38,85,208,274	4	16609436	16610036	37175200	NA	NA	NA	59	NA	251	NA	NA	180	192	NA	NA	FALSE	TRUE	NA	NA	NA	FALSE	NA	FALSE	NA	NA	TRUE	FALSE	NA	TRUE	NA	TRUE
107615632	Gnai2	chr9	-	107614125	107635367	1.07616e+08	40.2768	1	107615538	107615780	242	Gnai2:chr9:107615538-107615780:-	Gnai2:2	107615332	107615632	20,20	2	107615332	107615932	NA	NA	NA	NA	NA	NA	NA	NA	NA	137	NA	NA	NA	FALSE	NA	NA	NA	NA	NA	NA	NA	NA	NA	TRUE	NA	NA	TRUE	NA	TRUE
67224639	Gnal	chr18	+	67088216	67226792	6.72246e+07	34.891	0.0167362	67224455	67224664	209	Gnal:chr18:67224455-67224664:+	Gnal:9	67224639	67224939		NA	67224339	67224939	NA	NA	NA	NA	NA	NA	278	NA	NA	NA	171	83,88,92,96	NA	FALSE	NA	NA	NA	NA	NA	NA	FALSE	NA	NA	NA	TRUE	TRUE	TRUE	NA	TRUE
67224712	Gnal	chr18	+	67088216	67226792	6.72247e+07	66.3605	0.122408	67224489	67224888	399	Gnal:chr18:67224489-67224888:+	Gnal:9	67224712	67225012		NA	67224412	67225012	NA	293	NA	260	NA	NA	205	NA	291	NA	98282287	10,15,19,23	NA	FALSE	NA	FALSE	NA	FALSE	NA	NA	FALSE	NA	FALSE	NA	TRUE	FALSE	TRUE	NA	TRUE
19875396	Gng2	chr14	-	19872552	19977249	1.98754e+07	97.9957	0.17588	19875109	19875697	588	Gng2:chr14:19875109-19875697:-	Gng2:2	19875096	19875396	19	1	19875096	19875696	NA	NA	NA	NA	NA	NA	NA	124	NA	NA	182193	NA	NA	FALSE	NA	NA	NA	NA	NA	NA	NA	TRUE	NA	NA	FALSE	NA	TRUE	NA	TRUE
45376635	Gnpnat1	chr14	-	45376334	45388961	4.53766e+07	48.7408	0.614337	45376478	45376770	292	Gnpnat1:chr14:45376478-45376770:-	Gnpnat1:1	45376335	45376635		NA	45376335	45376935	NA	NA	NA	NA	287	NA	NA	NA	NA	160166170	NA	174	NA	FALSE	NA	NA	NA	NA	FALSE	NA	NA	NA	NA	TRUE	NA	TRUE	TRUE	NA	TRUE
45377797	Gnpnat1	chr14	-	45376334	45388961	4.53777e+07	117.807	0.035036	45377389	45378096	707	Gnpnat1:chr14:45377389-45378096:-	Gnpnat1:2	45377497	45377797	271	1	45377497	45378097	162239250	NA	NA	NA	NA	NA	NA	NA	NA	NA	NA	NA	NA	FALSE	TRUE	NA	NA	NA	NA	NA	NA	NA	NA	NA	NA	NA	TRUE	NA	TRUE
110226152	Golga3	chr5	+	110176701	110227804	1.10226e+08	30.0791	0.0322951	110225887	110226067	180	Golga3:chr5:110225887-110226067:+	Golga3:9	110226152	110226452	260289	2	110225852	110226452	214	130	NA	NA	NA	NA	NA	NA	263	NA	NA	201	NA	FALSE	FALSE	TRUE	NA	NA	NA	NA	NA	NA	FALSE	NA	NA	FALSE	TRUE	NA	TRUE
42270034	Golga7b	chr19	+	42247574	42270348	4.227e+07	97.5217	0.23262	42269738	42270324	586	Golga7b:chr19:42269738-42270324:+	Golga7b:3	42270034	42270334	264	1	42269734	42270334	NA	NA	NA	NA	NA	NA	NA	123	NA	286	NA	NA	NA	FALSE	NA	NA	NA	NA	NA	NA	NA	TRUE	NA	FALSE	NA	NA	TRUE	NA	TRUE
121935476	Golm2	chr2	+	121866970	121936220	1.21936e+08	91.6903	0.0945959	121935240	121935790	550	Golm2:chr2:121935240-121935790:+	Golm2:15	121935476	121935776	81226262	3	121935176	121935776	225	63142203	NA	36	NA	NA	NA	NA	NA	NA	NA	NA	NA	FALSE	FALSE	TRUE	NA	FALSE	NA	NA	NA	NA	NA	NA	NA	NA	TRUE	NA	TRUE
142403474	Golt1b	chr6	+	142387221	142405455	1.42404e+08	110.847	0.0964792	142403195	142403860	665	Golt1b:chr6:142403195-142403860:+	Golt1b:2	142403474	142403774		NA	142403174	142403774	49	NA	NA	NA	NA	NA	NA	NA	NA	NA	NA	53136143	NA	FALSE	FALSE	NA	NA	NA	NA	NA	NA	NA	NA	NA	NA	TRUE	TRUE	NA	TRUE
55068329	Gpam	chr19	-	55067264	55127216	5.50683e+07	89.6968	0.132351	55068078	55068616	538	Gpam:chr19:55068078-55068616:-	Gpam:1	55068029	55068329		NA	55068029	55068629	170	NA	NA	NA	203211	NA	NA	NA	NA	229	254	NA	NA	FALSE	TRUE	NA	NA	NA	FALSE	NA	NA	NA	NA	FALSE	FALSE	NA	TRUE	NA	TRUE
78846775	Gpatch11	chr17	+	78835589	78848308	7.88469e+07	149.195	0.308899	78846403	78847298	895	Gpatch11:chr17:78846403-78847298:+	Gpatch11:10	78846775	78847075	34283	2	78846475	78847075	94	NA	NA	NA	NA	NA	NA	NA	267	263	NA	NA	NA	FALSE	TRUE	NA	NA	NA	NA	NA	NA	NA	FALSE	FALSE	NA	NA	TRUE	NA	TRUE
78847195	Gpatch11	chr17	+	78835589	78848308	7.88472e+07	49.9154	0.0923684	78847057	78847356	299	Gpatch11:chr17:78847057-78847356:+	Gpatch11:10	78847195	78847495	216	1	78846895	78847495	19	NA	NA	10	NA	NA	NA	NA	NA	196	NA	84178	21,22,23,24,25	FALSE	FALSE	NA	NA	FALSE	NA	NA	NA	NA	NA	FALSE	NA	TRUE	TRUE	FALSE	TRUE
132529678	Gpcpd1	chr2	-	132528837	132578187	1.32529e+08	66.5576	0.237468	132529117	132529516	399	Gpcpd1:chr2:132529117-132529516:-	Gpcpd1:1	132529378	132529678	283,258,88	3	132529378	132529978	NA	157	212	NA	NA	16	NA	231278	109	67242	NA	NA	NA	FALSE	NA	TRUE	FALSE	NA	NA	FALSE	NA	FALSE	TRUE	FALSE	NA	NA	TRUE	NA	TRUE
132529833	Gpcpd1	chr2	-	132528837	132578187	1.3253e+08	36.6775	0.00640769	132529958	132530178	220	Gpcpd1:chr2:132529958-132530178:-	Gpcpd1:1	132529533	132529833	243,97	2	132529533	132530133	NA	NA	NA	69	NA	146171	NA	NA	264	222	NA	93	NA	FALSE	NA	NA	NA	FALSE	NA	TRUE	NA	NA	FALSE	FALSE	NA	TRUE	TRUE	NA	TRUE
57368450	Gpd2	chr2	+	57237678	57370719	5.73684e+07	76.5369	1	57368198	57368657	459	Gpd2:chr2:57368198-57368657:+	Gpd2:9	57368450	57368750	55209250	3	57368150	57368750	NA	NA	NA	NA	NA	NA	NA	NA	NA	37188193	NA	173	NA	FALSE	NA	NA	NA	NA	NA	NA	NA	NA	NA	FALSE	NA	TRUE	TRUE	NA	TRUE
31217749	Gpr107	chr2	+	31152316	31218778	3.12177e+07	50.7767	0.186161	31217579	31217884	305	Gpr107:chr2:31217579-31217884:+	Gpr107:10	31217749	31218049		NA	31217449	31218049	NA	171	NA	NA	NA	NA	NA	NA	NA	NA	NA	96100	NA	FALSE	NA	TRUE	NA	NA	NA	NA	NA	NA	NA	NA	NA	TRUE	TRUE	NA	TRUE
72069623	Gpr135	chr12	-	72067953	72071125	7.20696e+07	54.0609	0.305909	72069461	72069785	324	Gpr135:chr12:72069461-72069785:-	Gpr135:1	72069323	72069623		NA	72069323	72069923	83109158	NA	NA	95	NA	NA	89115	NA	NA	222287	NA	280	216217	FALSE	TRUE	NA	NA	TRUE	NA	NA	TRUE	NA	NA	FALSE	NA	FALSE	TRUE	FALSE	TRUE
13353797	Gpr137b	chr13	-	13353441	13393624	1.33538e+07	30.1498	0.0822207	13353756	13353937	181	Gpr137b:chr13:13353756-13353937:-	Gpr137b:1	13353497	13353797	282	1	13353497	13354097	185	NA	89	NA	NA	126	NA	NA	NA	34	NA	NA	NA	FALSE	FALSE	NA	FALSE	NA	NA	TRUE	NA	NA	NA	FALSE	NA	NA	TRUE	NA	TRUE
13361061	Gpr137b	chr13	-	13353441	13393624	13361061	62.7982	0.257995	13360872	13361249	377	Gpr137b:chr13:13360872-13361249:-	Gpr137b:4	13360761	13361061	263233	2	13360761	13361361	NA	NA	NA	NA	NA	NA	NA	NA	103130	NA	NA	NA	NA	FALSE	NA	NA	NA	NA	NA	NA	NA	NA	TRUE	NA	NA	NA	TRUE	NA	TRUE
45221517	Gpr137c	chr14	+	45219717	45282738	4.52215e+07	78.2966	1	45221290	45221760	470	Gpr137c:chr14:45221290-45221760:+	Gpr137c:1	45221517	45221817		NA	45221217	45221817	106	NA	NA	55228	NA	NA	NA	NA	NA	81165	NA	186	NA	FALSE	TRUE	NA	NA	FALSE	NA	NA	NA	NA	NA	TRUE	NA	FALSE	TRUE	NA	TRUE
45222170	Gpr137c	chr14	+	45219717	45282738	4.52222e+07	165.575	0.437063	45221744	45222737	993	Gpr137c:chr14:45221744-45222737:+	Gpr137c:2	45222170	45222470	291	1	45221870	45222470	NA	NA	NA	NA	249268	NA	NA	272	NA	191	110241	182	NA	FALSE	NA	NA	NA	NA	FALSE	NA	NA	FALSE	NA	FALSE	TRUE	FALSE	TRUE	NA	TRUE
45282505	Gpr137c	chr14	+	45219717	45282738	4.52824e+07	32.8714	0.117258	45282331	45282529	198	Gpr137c:chr14:45282331-45282529:+	Gpr137c:21	45282505	45282738	224	1	45282205	45282805	NA	NA	NA	NA	NA	NA	191	169	NA	201	NA	NA	NA	FALSE	NA	NA	NA	NA	NA	NA	FALSE	TRUE	NA	FALSE	NA	NA	TRUE	NA	TRUE
165326453	Gpr161	chr1	+	165302623	165326766	1.65326e+08	83.5054	0.25513	165326212	165326713	501	Gpr161:chr1:165326212-165326713:+	Gpr161:1	165326453	165326753	15294	2	165326153	165326753	NA	NA	192	NA	273	238	NA	NA	154	NA	NA	NA	NA	FALSE	NA	NA	FALSE	NA	FALSE	FALSE	NA	NA	TRUE	NA	NA	NA	TRUE	NA	TRUE
37518945	Gpr21	chr2	+	37516626	37522306	3.7519e+07	193.998	0.112927	37518439	37519603	1164	Gpr21:chr2:37518439-37519603:+	Gpr21:2	37518945	37519245		NA	37518645	37519245	NA	NA	NA	NA	NA	NA	NA	137	11	NA	NA	NA	NA	FALSE	NA	NA	NA	NA	NA	NA	NA	TRUE	FALSE	NA	NA	NA	TRUE	NA	TRUE
37522124	Gpr21	chr2	+	37516626	37522306	3.75221e+07	95.0574	1	37521829	37522306	477	Gpr21:chr2:37521829-37522306:+	Gpr21:4	37522124	37522306	74	1	37521824	37522424	NA	176	NA	NA	NA	56	NA	NA	NA	156	69	123	NA	FALSE	NA	TRUE	NA	NA	NA	FALSE	NA	NA	NA	TRUE	FALSE	TRUE	TRUE	NA	TRUE
99694348	Gpr27	chr6	+	99692679	99695087	9.96946e+07	177.274	0.0549643	99694043	99695087	1044	Gpr27:chr6:99694043-99695087:+	Gpr27:1	99694348	99694648	204	1	99694048	99694648	160	86	NA	NA	NA	167	NA	NA	NA	NA	NA	NA	NA	FALSE	TRUE	FALSE	NA	NA	NA	TRUE	NA	NA	NA	NA	NA	NA	TRUE	NA	TRUE
41070133	Gpr6	chr10	-	41069977	41072285	4.10701e+07	41.7769	1	41070002	41070253	251	Gpr6:chr10:41070002-41070253:-	Gpr6:1	41069977	41070133		NA	41069833	41070433	NA	145	NA	NA	NA	NA	NA	NA	151	134	NA	NA	NA	FALSE	NA	TRUE	NA	NA	NA	NA	NA	NA	TRUE	TRUE	NA	NA	TRUE	NA	TRUE
25012500	Gpr63	chr4	+	24973419	25012739	2.50123e+07	29.3434	0.0210886	25012163	25012339	176	Gpr63:chr4:25012163-25012339:+	Gpr63:4	25012500	25012739	35220	2	25012200	25012800	128	NA	NA	NA	57	NA	NA	96100198	NA	7190202	175	NA	NA	FALSE	TRUE	NA	NA	NA	FALSE	NA	NA	TRUE	NA	FALSE	TRUE	NA	TRUE	NA	TRUE
135845885	Gprasp2	chrX	+	135839034	135848765	1.35846e+08	32.9631	1	135845797	135845995	198	Gprasp2:chrX:135845797-135845995:+	Gprasp2:5	135845885	135846185		NA	135845585	135846185	52	271	NA	NA	NA	NA	NA	155	194	NA	NA	100	NA	FALSE	FALSE	FALSE	NA	NA	NA	NA	NA	TRUE	FALSE	NA	NA	TRUE	TRUE	NA	TRUE
118974019	Gprc5b	chr7	-	118972040	118995211	1.18974e+08	50.1684	0.063452	118973885	118974186	301	Gprc5b:chr7:118973885-118974186:-	Gprc5b:2	118973719	118974019	253209109	3	118973719	118974319	272	177231	NA	NA	88	NA	NA	NA	NA	NA	NA	NA	NA	FALSE	FALSE	TRUE	NA	NA	FALSE	NA	NA	NA	NA	NA	NA	NA	TRUE	NA	TRUE
115645915	Grb2	chr11	-	115644045	115699307	115645915	45.896	0.103849	115645777	115646052	275	Grb2:chr11:115645777-115646052:-	Grb2:2	115645615	115645915		NA	115645615	115646215	164	NA	NA	NA	NA	NA	NA	NA	NA	NA	168	NA	NA	FALSE	TRUE	NA	NA	NA	NA	NA	NA	NA	NA	NA	TRUE	NA	TRUE	NA	TRUE
41672456	Gria3	chrX	+	41401304	41678601	4.16724e+07	36.5437	1	41672316	41672535	219	Gria3:chrX:41672316-41672535:+	Gria3:18	41672456	41672756	8,10	2	41672156	41672756	139	NA	NA	NA	NA	27	NA	NA	262	NA	NA	NA	NA	FALSE	TRUE	NA	NA	NA	NA	FALSE	NA	NA	FALSE	NA	NA	NA	TRUE	NA	TRUE
41678242	Gria3	chrX	+	41401304	41678601	4.16783e+07	119.02	0.230882	41677908	41678601	693	Gria3:chrX:41677908-41678601:+	Gria3:20	41678242	41678542	93	1	41677942	41678542	78102	NA	NA	NA	NA	NA	NA	NA	NA	NA	NA	NA	80,81,82	FALSE	TRUE	NA	NA	NA	NA	NA	NA	NA	NA	NA	NA	NA	TRUE	FALSE	TRUE
49099885	Grik2	chr10	-	49093058	49788766	4.90999e+07	112.829	0.184985	49099594	49100271	677	Grik2:chr10:49099594-49100271:-	Grik2:1	49099585	49099885	271,50,271,50,271,50	6	49099585	49100185	NA	88	186	NA	282	NA	NA	164	NA	NA	44	NA	NA	FALSE	NA	FALSE	FALSE	NA	FALSE	NA	NA	TRUE	NA	NA	FALSE	NA	TRUE	NA	TRUE
25010003	Grik5	chr7	-	25009842	25072292	2.501e+07	71.651	1	25009842	25010218	376	Grik5:chr7:25009842-25010218:-	Grik5:1	25009842	25010003	76	1	25009703	25010303	NA	NA	NA	NA	NA	NA	NA	NA	NA	129	NA	141	NA	FALSE	NA	NA	NA	NA	NA	NA	NA	NA	NA	TRUE	NA	TRUE	TRUE	NA	TRUE
135713544	Grin2b	chr6	-	135713197	136173511	1.35714e+08	69.419	0.667006	135713321	135713738	417	Grin2b:chr6:135713321-135713738:-	Grin2b:1	135713244	135713544		NA	135713244	135713844	NA	208	NA	180	153	NA	NA	NA	NA	283	189287	146	NA	FALSE	NA	FALSE	NA	TRUE	TRUE	NA	NA	NA	NA	FALSE	FALSE	TRUE	TRUE	NA	TRUE
135718813	Grin2b	chr6	-	135713197	136173511	1.35719e+08	43.2192	1	135718677	135718937	260	Grin2b:chr6:135718677-135718937:-	Grin2b:2	135718513	135718813		NA	135718513	135719113	NA	NA	NA	145	158	182	201	NA	225	150	NA	174	NA	FALSE	NA	NA	NA	TRUE	TRUE	FALSE	FALSE	NA	FALSE	TRUE	NA	TRUE	TRUE	NA	TRUE
135726096	Grin2b	chr6	-	135713197	136173511	1.35726e+08	66.5842	1	135725875	135726274	399	Grin2b:chr6:135725875-135726274:-	Grin2b:3	135725796	135726096		NA	135725796	135726396	121184	NA	NA	225	211	194	NA	NA	NA	NA	198	NA	NA	FALSE	TRUE	NA	NA	FALSE	FALSE	FALSE	NA	NA	NA	NA	FALSE	NA	TRUE	NA	TRUE
61095707	Grk5	chr19	+	60889749	61098990	6.10957e+07	30.7148	0.191565	61095577	61095762	185	Grk5:chr19:61095577-61095762:+	Grk5:20	61095707	61096007	267	1	61095407	61096007	NA	NA	NA	NA	NA	NA	NA	101105252	NA	240	NA	NA	NA	FALSE	NA	NA	NA	NA	NA	NA	NA	TRUE	NA	FALSE	NA	NA	TRUE	NA	TRUE
88131407	Grm5	chr7	+	87584393	88135063	8.81312e+07	32.332	0.0403732	88131080	88131274	194	Grm5:chr7:88131080-88131274:+	Grm5:20	88131407	88131707	247	1	88131107	88131707	NA	NA	NA	NA	NA	NA	NA	102	NA	NA	187	1.06253e+23	285	FALSE	NA	NA	NA	NA	NA	NA	NA	TRUE	NA	NA	FALSE	TRUE	TRUE	FALSE	TRUE
65886382	Grp	chr18	+	65872820	65886596	6.58864e+07	72.5857	1	65886178	65886596	418	Grp:chr18:65886178-65886596:+	Grp:1	65886382	65886596	56208	2	65886082	65886682	NA	NA	NA	NA	NA	NA	32	114	NA	181	NA	NA	NA	FALSE	NA	NA	NA	NA	NA	NA	FALSE	TRUE	NA	FALSE	NA	NA	TRUE	NA	TRUE
105702814	Gskip	chr12	+	105684829	105703323	1.05703e+08	93.0767	0.985007	105702556	105703114	558	Gskip:chr12:105702556-105703114:+	Gskip:10	105702814	105703114	210241	2	105702514	105703114	159182	NA	NA	217	NA	NA	NA	NA	NA	186	NA	NA	NA	FALSE	TRUE	NA	NA	FALSE	NA	NA	NA	NA	NA	FALSE	NA	NA	TRUE	NA	TRUE
132981827	Gstcd	chr3	-	132977717	133091825	1.32982e+08	26.6879	0.0478428	132981703	132981863	160	Gstcd:chr3:132981703-132981863:-	Gstcd:1	132981527	132981827	75,40,25,13	4	132981527	132982127	169	NA	NA	209	NA	53201	NA	NA	NA	NA	142179248	151	NA	FALSE	TRUE	NA	NA	FALSE	NA	FALSE	NA	NA	NA	NA	TRUE	TRUE	TRUE	NA	TRUE
44565519	Gtdc1	chr2	-	44564407	44927236	4.45655e+07	18.1502	0.225513	44565450	44565559	109	Gtdc1:chr2:44565450-44565559:-	Gtdc1:2	44565219	44565519		NA	44565219	44565819	NA	NA	NA	NA	273	NA	NA	NA	NA	NA	158	NA	NA	FALSE	NA	NA	NA	NA	FALSE	NA	NA	NA	NA	NA	TRUE	NA	TRUE	NA	TRUE
91558393	Gtf2a1	chr12	-	91555118	91590009	9.15584e+07	49.8172	1	91558254	91558553	299	Gtf2a1:chr12:91558254-91558553:-	Gtf2a1:3	91558093	91558393		NA	91558093	91558693	194	NA	135	NA	NA	NA	NA	NA	NA	NA	152	NA	NA	FALSE	FALSE	NA	TRUE	NA	NA	NA	NA	NA	NA	NA	TRUE	NA	TRUE	NA	TRUE
75897396	Gtf2f2	chr14	-	75895676	76010865	7.58973e+07	84.4282	0.152086	75897040	75897547	507	Gtf2f2:chr14:75897040-75897547:-	Gtf2f2:1	75897096	75897396	275,236,66,19	4	75897096	75897696	NA	NA	NA	NA	210	NA	48	269	NA	NA	175	NA	NA	FALSE	NA	NA	NA	NA	FALSE	NA	FALSE	FALSE	NA	NA	TRUE	NA	TRUE	NA	TRUE
134358523	Gtf2ird1	chr5	-	134357656	134456576	134358523	91.0336	0.115654	134358249	134358796	547	Gtf2ird1:chr5:134358249-134358796:-	Gtf2ird1:2	134358223	134358523	249	1	134358223	134358823	NA	101	NA	NA	NA	NA	NA	245	NA	NA	6254	NA	NA	FALSE	NA	TRUE	NA	NA	NA	NA	NA	FALSE	NA	NA	FALSE	NA	TRUE	NA	TRUE
28822642	Gtf3c4	chr2	-	28822299	28840360	2.88226e+07	101.584	0.108848	28822320	28822930	610	Gtf3c4:chr2:28822320-28822930:-	Gtf3c4:1	28822342	28822642		NA	28822342	28822942	208	112	NA	NA	NA	NA	NA	NA	110	NA	NA	NA	NA	FALSE	FALSE	TRUE	NA	NA	NA	NA	NA	NA	TRUE	NA	NA	NA	TRUE	NA	TRUE
5538965	Gtpbp10	chr5	-	5537449	5559538	5.53896e+06	66.2119	0.867057	5538758	5539155	397	Gtpbp10:chr5:5538758-5539155:-	Gtpbp10:2	5538665	5538965		NA	5538665	5539265	83148170	NA	NA	NA	NA	NA	NA	NA	139	NA	96	NA	NA	FALSE	TRUE	NA	NA	NA	NA	NA	NA	NA	TRUE	NA	TRUE	NA	TRUE	NA	TRUE
5559046	Gtpbp10	chr5	-	5537449	5559538	5.55904e+06	53.8606	1	5558875	5559198	323	Gtpbp10:chr5:5558875-5559198:-	Gtpbp10:5	5558746	5559046		NA	5558746	5559346	214275	144	NA	NA	57	NA	NA	NA	NA	161183	187	NA	NA	FALSE	FALSE	TRUE	NA	NA	FALSE	NA	NA	NA	NA	TRUE	FALSE	NA	TRUE	NA	TRUE
69572825	Guf1	chr5	+	69556961	69575780	6.95728e+07	51.0767	0.147924	69572659	69572965	306	Guf1:chr5:69572659-69572965:+	Guf1:10	69572825	69573125	107205253280292	5	69572525	69573125	NA	NA	NA	NA	NA	NA	196	NA	NA	177222	273	248	NA	FALSE	NA	NA	NA	NA	NA	NA	FALSE	NA	NA	TRUE	FALSE	FALSE	TRUE	NA	TRUE
44795974	Gulp1	chr1	+	44551511	44797292	4.47959e+07	54.8731	0.273081	44795765	44796095	330	Gulp1:chr1:44795765-44796095:+	Gulp1:13	44795974	44796274	232232	2	44795674	44796274	NA	146	NA	NA	NA	NA	NA	97	NA	64206217225	211	NA	NA	FALSE	NA	TRUE	NA	NA	NA	NA	NA	TRUE	NA	FALSE	FALSE	NA	TRUE	NA	TRUE
129989368	Gusb	chr5	-	129988348	130003049	1.29989e+08	52.0258	0.035054	129989223	129989535	312	Gusb:chr5:129989223-129989535:-	Gusb:1	129989068	129989368	295,58	2	129989068	129989668	NA	NA	NA	NA	NA	NA	104	NA	NA	NA	NA	NA	NA	FALSE	NA	NA	NA	NA	NA	NA	TRUE	NA	NA	NA	NA	NA	TRUE	NA	TRUE
93244690	Gxylt1	chr15	-	93239730	93275179	9.32446e+07	153.682	0.503537	93244113	93245035	922	Gxylt1:chr15:93244113-93245035:-	Gxylt1:4	93244390	93244690	297,279,256,235,74,297,279,256,235,74	10	93244390	93244990	278	NA	NA	NA	NA	NA	NA	NA	NA	NA	152	NA	NA	FALSE	FALSE	NA	NA	NA	NA	NA	NA	NA	NA	NA	TRUE	NA	TRUE	NA	TRUE
100806567	Gxylt2	chr6	+	100704734	100810913	1.00807e+08	77.5396	0.953141	100806329	100806794	465	Gxylt2:chr6:100806329-100806794:+	Gxylt2:3	100806567	100806867		NA	100806267	100806867	NA	NA	NA	NA	NA	NA	NA	NA	NA	NA	1.1612e+53	NA	1.03104e+20	FALSE	NA	NA	NA	NA	NA	NA	NA	NA	NA	NA	TRUE	NA	TRUE	FALSE	TRUE
80510117	Gypa	chr8	+	80493781	80510785	8.05099e+07	57.5058	0.020017	80509746	80510091	345	Gypa:chr8:80509746-80510091:+	Gypa:4	80510117	80510417	232	1	80509817	80510417	NA	71,78	64	NA	NA	NA	286	NA	69,76	218	NA	180	NA	FALSE	NA	FALSE	FALSE	NA	NA	NA	FALSE	NA	FALSE	FALSE	NA	TRUE	TRUE	NA	TRUE
80510271	Gypa	chr8	+	80493781	80510785	8.05103e+07	54.2294	0.251258	80510186	80510512	326	Gypa:chr8:80510186-80510512:+	Gypa:4	80510271	80510571	78246271283	4	80509971	80510571	270	284	NA	NA	NA	NA	132	NA	263282	64256289	NA	26	NA	FALSE	FALSE	FALSE	NA	NA	NA	NA	TRUE	NA	FALSE	FALSE	NA	FALSE	TRUE	NA	TRUE
23618323	H1f4	chr13	-	23617170	23622558	2.36183e+07	47.5249	0.80938	23618182	23618468	286	H1f4:chr13:23618182-23618468:-	H1f4:1	23618023	23618323	21	1	23618023	23618623	NA	NA	NA	NA	NA	NA	NA	NA	NA	NA	1.41166e+38	NA	NA	FALSE	NA	NA	NA	NA	NA	NA	NA	NA	NA	NA	TRUE	NA	TRUE	NA	TRUE
36078086	H2-Bl	chr17	-	36077370	36084223	3.60781e+07	28.6813	1	36078017	36078189	172	H2-Bl:chr17:36078017-36078189:-	H2-Bl:1	36077786	36078086		NA	36077786	36078386	106250	137228	NA	NA	NA	NA	NA	212	NA	159	174	67,72,94	70,71,72,73,74,75,76,77,78	FALSE	TRUE	TRUE	NA	NA	NA	NA	NA	FALSE	NA	TRUE	TRUE	TRUE	TRUE	FALSE	TRUE
35476156	H2-Q10	chr17	+	35470089	35477083	3.54761e+07	27.4332	1	35476054	35476219	165	H2-Q10:chr17:35476054-35476219:+	H2-Q10:1	35476156	35476456		NA	35475856	35476456	NA	NA	NA	NA	NA	78	NA	NA	NA	82,86	NA	90,94,98,102,106	NA	FALSE	NA	NA	NA	NA	NA	FALSE	NA	NA	NA	FALSE	NA	TRUE	TRUE	NA	TRUE
36029877	H2-T23	chr17	-	36029769	36032855	36029877	27.0632	0.0184937	36029795	36029958	163	H2-T23:chr17:36029795-36029958:-	H2-T23:1	36029769	36029877		NA	36029577	36030177	83	NA	NA	69	75	NA	NA	NA	NA	90	NA	12	NA	FALSE	FALSE	NA	NA	FALSE	FALSE	NA	NA	NA	NA	TRUE	NA	FALSE	TRUE	NA	TRUE
36029934	H2-T23	chr17	-	36029769	36032855	36029934	89.8239	0.17787	36029769	36030203	434	H2-T23:chr17:36029769-36030203:-	H2-T23:1	36029769	36029934		NA	36029634	36030234	140	NA	NA	126	132	NA	NA	NA	NA	147	NA	69	NA	FALSE	TRUE	NA	NA	TRUE	TRUE	NA	NA	NA	NA	TRUE	NA	FALSE	TRUE	NA	TRUE
36030190	H2-T23	chr17	-	36029769	36032855	36030190	52.0672	0.519769	36030033	36030346	313	H2-T23:chr17:36030033-36030346:-	H2-T23:1	36029890	36030190	214	1	36029890	36030490	NA	NA	NA	NA	NA	NA	NA	214218222226230	NA	1.74178e+29	NA	NA	NA	FALSE	NA	NA	NA	NA	NA	NA	NA	FALSE	NA	TRUE	NA	NA	TRUE	NA	TRUE
21717227	H2ac13	chr13	+	21716422	21717456	21717227	79.3566	0.0162022	21716988	21717456	468	H2ac13:chr13:21716988-21717456:+	H2ac13:1	21717227	21717456	229	1	21716927	21717527	129224	NA	NA	NA	NA	NA	NA	NA	NA	207	184192	NA	NA	FALSE	TRUE	NA	NA	NA	NA	NA	NA	NA	NA	FALSE	FALSE	NA	TRUE	NA	TRUE
23933860	H2bc1	chr13	-	23933725	23934156	2.39339e+07	39.1405	1	23933741	23933976	235	H2bc1:chr13:23933741-23933976:-	H2bc1:1	23933725	23933860	87	1	23933560	23934160	NA	NA	NA	NA	NA	NA	NA	NA	NA	NA	NA	104	NA	FALSE	NA	NA	NA	NA	NA	NA	NA	NA	NA	NA	NA	TRUE	TRUE	NA	TRUE
23684613	H2bc4	chr13	+	23684199	23694190	23684613	98.6767	0.0486502	23684316	23684909	593	H2bc4:chr13:23684316-23684909:+	H2bc4:1	23684613	23684913	6	1	23684313	23684913	NA	124	NA	NA	NA	NA	NA	NA	NA	NA	NA	260	202	FALSE	NA	TRUE	NA	NA	NA	NA	NA	NA	NA	NA	NA	FALSE	TRUE	FALSE	TRUE
23584898	H2bc6	chr13	-	23583658	23621094	2.35849e+07	62.8628	1	23584711	23585088	377	H2bc6:chr13:23584711-23585088:-	H2bc6:1	23584598	23584898		NA	23584598	23585198	3	NA	NA	NA	NA	NA	NA	NA	NA	NA	124	NA	NA	FALSE	FALSE	NA	NA	NA	NA	NA	NA	NA	NA	NA	TRUE	NA	TRUE	NA	TRUE
136930991	H2bw2	chrX	+	136927325	136931493	1.36931e+08	31.1369	0.47536	136930896	136931082	186	H2bw2:chrX:136930896-136931082:+	H2bw2:1	136930991	136931291		NA	136930691	136931291	94	NA	NA	NA	NA	NA	NA	36	NA	NA	NA	NA	NA	FALSE	TRUE	NA	NA	NA	NA	NA	NA	FALSE	NA	NA	NA	NA	TRUE	NA	TRUE
23561621	H3c6	chr13	-	23561475	23562369	23561621	73.971	0.045418	23561475	23561842	367	H3c6:chr13:23561475-23561842:-	H3c6:1	23561475	23561621		NA	23561321	23561921	68	NA	NA	NA	117	NA	NA	NA	NA	NA	NA	NA	NA	FALSE	FALSE	NA	NA	NA	TRUE	NA	NA	NA	NA	NA	NA	NA	TRUE	NA	TRUE
23561674	H3c6	chr13	-	23561475	23562369	23561674	81.8936	0.162666	23561475	23561919	444	H3c6:chr13:23561475-23561919:-	H3c6:1	23561475	23561674		NA	23561374	23561974	121	NA	NA	NA	170	18	NA	NA	NA	NA	NA	NA	NA	FALSE	TRUE	NA	NA	NA	TRUE	FALSE	NA	NA	NA	NA	NA	NA	TRUE	NA	TRUE
23545221	H3c7	chr13	+	23544052	23549231	23545221	143.631	0.0524714	23544790	23545651	861	H3c7:chr13:23544790-23545651:+	H3c7:1	23545221	23545521	91	1	23544921	23545521	72266	NA	NA	234	121241	NA	NA	NA	NA	NA	NA	NA	NA	FALSE	FALSE	NA	NA	FALSE	TRUE	NA	NA	NA	NA	NA	NA	NA	TRUE	NA	TRUE
180802932	H3f3a	chr1	-	180800832	180813632	1.80803e+08	97.1173	0.422127	180802586	180803168	582	H3f3a:chr1:180802586-180803168:-	H3f3a:1	180802632	180802932	237226211	3	180802632	180803232	181	52131	NA	NA	NA	190	212	NA	50	135	NA	NA	NA	FALSE	FALSE	TRUE	NA	NA	NA	FALSE	FALSE	NA	FALSE	TRUE	NA	NA	TRUE	NA	TRUE
96261885	H4c14	chr3	-	96258100	96263311	9.62619e+07	54.036	0.641186	96261720	96262044	324	H4c14:chr3:96261720-96262044:-	H4c14:1	96261585	96261885		NA	96261585	96262185	NA	NA	NA	167	NA	NA	NA	NA	NA	172	195284	1,18,22,189,215,219	NA	FALSE	NA	NA	NA	TRUE	NA	NA	NA	NA	NA	TRUE	FALSE	FALSE	TRUE	NA	TRUE
96262072	H4c14	chr3	-	96258100	96263311	9.6262e+07	101.13	0.358814	96261705	96262312	607	H4c14:chr3:96261705-96262312:-	H4c14:1	96261772	96262072		NA	96261772	96262372	NA	NA	NA	NA	NA	NA	NA	NA	NA	NA	NA	175183188205209	NA	FALSE	NA	NA	NA	NA	NA	NA	NA	NA	NA	NA	NA	TRUE	TRUE	NA	TRUE
21831950	H4c18	chr13	-	21831767	21832196	21831950	57.6523	0.885596	21831777	21832122	345	H4c18:chr13:21831777-21832122:-	H4c18:1	21831767	21831950		NA	21831650	21832250	NA	NA	NA	NA	NA	NA	132	NA	NA	NA	NA	NA	NA	FALSE	NA	NA	NA	NA	NA	NA	TRUE	NA	NA	NA	NA	NA	TRUE	NA	TRUE
23582532	H4c4	chr13	+	23581598	23582735	2.35825e+07	76.8278	1	23582292	23582735	443	H4c4:chr13:23582292-23582735:+	H4c4:2	23582532	23582735	203	1	23582232	23582832	NA	NA	NA	NA	NA	NA	135	NA	NA	NA	51	NA	NA	FALSE	NA	NA	NA	NA	NA	NA	TRUE	NA	NA	NA	FALSE	NA	TRUE	NA	TRUE
23531961	H4c8	chr13	+	23531050	23533723	2.3532e+07	66.0772	1	23531758	23532154	396	H4c8:chr13:23531758-23532154:+	H4c8:2	23531961	23532261	56	1	23531661	23532261	NA	NA	NA	NA	NA	NA	NA	NA	NA	40	198219	178183194	NA	FALSE	NA	NA	NA	NA	NA	NA	NA	NA	NA	FALSE	FALSE	TRUE	TRUE	NA	TRUE
136802806	H4f16	chr6	-	136801553	136804415	1.36803e+08	41.4153	1	136802687	136802936	249	H4f16:chr6:136802687-136802936:-	H4f16:1	136802506	136802806		NA	136802506	136803106	NA	17	NA	NA	NA	NA	NA	145158	NA	NA	141	150202	NA	FALSE	NA	FALSE	NA	NA	NA	NA	NA	TRUE	NA	NA	TRUE	TRUE	TRUE	NA	TRUE
91720714	Harbi1	chr2	+	91710917	91725010	9.17207e+07	65.0696	0.0309714	91720463	91720853	390	Harbi1:chr2:91720463-91720853:+	Harbi1:3	91720714	91721014	76206	2	91720414	91721014	138	NA	NA	129	NA	NA	NA	279	NA	54	263	NA	NA	FALSE	TRUE	NA	NA	TRUE	NA	NA	NA	FALSE	NA	FALSE	FALSE	NA	TRUE	NA	TRUE
123873683	Hcar1	chr5	-	123873258	123880020	1.23874e+08	36.6361	1	123873548	123873768	220	Hcar1:chr5:123873548-123873768:-	Hcar1:1	123873383	123873683		NA	123873383	123873983	NA	NA	NA	NA	NA	NA	NA	NA	NA	NA	5,13,21,29,37,45,53,61,69,77,85,93,101	NA	NA	FALSE	NA	NA	NA	NA	NA	NA	NA	NA	NA	NA	TRUE	NA	TRUE	NA	TRUE
58860679	Hcn4	chr9	+	58823412	58863180	5.88607e+07	43.0111	1	58860552	58860810	258	Hcn4:chr9:58860552-58860810:+	Hcn4:1	58860679	58860979	216	1	58860379	58860979	NA	NA	NA	175	NA	NA	NA	NA	NA	NA	NA	198	NA	FALSE	NA	NA	NA	TRUE	NA	NA	NA	NA	NA	NA	NA	FALSE	TRUE	NA	TRUE
58862889	Hcn4	chr9	+	58823412	58863180	5.88629e+07	108.753	0.25666	58862570	58863180	610	Hcn4:chr9:58862570-58863180:+	Hcn4:2	58862889	58863180	205243287	3	58862589	58863189	219263	109	NA	NA	NA	NA	NA	NA	NA	267	NA	NA	NA	FALSE	FALSE	TRUE	NA	NA	NA	NA	NA	NA	NA	FALSE	NA	NA	TRUE	NA	TRUE
129516309	Hdac1	chr4	-	129516099	129542713	1.29516e+08	43.0129	0.830152	129516169	129516427	258	Hdac1:chr4:129516169-129516427:-	Hdac1:1	129516099	129516309	205	1	129516009	129516609	NA	NA	NA	NA	NA	NA	NA	NA	NA	180	NA	79	NA	FALSE	NA	NA	NA	NA	NA	NA	NA	NA	NA	TRUE	NA	FALSE	TRUE	NA	TRUE
102195858	Hdac5	chr11	-	102194426	102230166	102195858	47.0386	0.261644	102195716	102195999	283	Hdac5:chr11:102195716-102195999:-	Hdac5:1	102195558	102195858	109,77,109,77	4	102195558	102196158	NA	NA	NA	NA	86	NA	NA	NA	NA	NA	NA	92	NA	FALSE	NA	NA	NA	NA	FALSE	NA	NA	NA	NA	NA	NA	TRUE	TRUE	NA	TRUE
83781930	Heatr6	chr11	+	83753696	83786844	8.37819e+07	139.891	0.356414	83781430	83782270	840	Heatr6:chr11:83781430-83782270:+	Heatr6:12	83781930	83782230	2,91	2	83781630	83782230	120	NA	NA	NA	NA	NA	NA	NA	NA	65,69	58276	NA	273274275276277	FALSE	TRUE	NA	NA	NA	NA	NA	NA	NA	NA	FALSE	FALSE	NA	TRUE	FALSE	TRUE
66510860	Herc1	chr9	+	66350526	66510990	6.65109e+07	54.8345	1	66510685	66510990	305	Herc1:chr9:66510685-66510990:+	Herc1:22	66510860	66510990		NA	66510560	66511160	NA	NA	NA	NA	NA	NA	NA	NA	NA	113	NA	NA	NA	FALSE	NA	NA	NA	NA	NA	NA	NA	NA	NA	TRUE	NA	NA	TRUE	NA	TRUE
27002630	Hesx1	chr14	+	27000362	27003259	2.70026e+07	32.9216	1	27002531	27002728	197	Hesx1:chr14:27002531-27002728:+	Hesx1:1	27002630	27002930		NA	27002330	27002930	290	NA	NA	NA	NA	NA	NA	NA	105	NA	44	252	28,29,30,31,32,33,34,35,36,37	FALSE	FALSE	NA	NA	NA	NA	NA	NA	NA	TRUE	NA	FALSE	FALSE	TRUE	FALSE	TRUE
108329373	Hhipl1	chr12	+	108306270	108331159	1.08329e+08	54.083	1	108329208	108329532	324	Hhipl1:chr12:108329208-108329532:+	Hhipl1:3	108329373	108329673	223	1	108329073	108329673	136193	NA	NA	NA	NA	NA	NA	NA	NA	NA	156217	NA	NA	FALSE	TRUE	NA	NA	NA	NA	NA	NA	NA	NA	NA	TRUE	NA	TRUE	NA	TRUE
108330581	Hhipl1	chr12	+	108306270	108331159	1.08331e+08	45.538	0.512331	108330553	108330826	273	Hhipl1:chr12:108330553-108330826:+	Hhipl1:4	108330581	108330881	286	1	108330281	108330881	265	NA	NA	NA	NA	NA	NA	NA	NA	269	NA	125	NA	FALSE	FALSE	NA	NA	NA	NA	NA	NA	NA	NA	FALSE	NA	TRUE	TRUE	NA	TRUE
124005341	Hip1r	chr5	+	123973628	124005937	1.24005e+08	67.2923	1	124005141	124005545	404	Hip1r:chr5:124005141-124005545:+	Hip1r:3	124005341	124005641	106218228	3	124005041	124005641	100129	186	NA	NA	NA	211	NA	NA	184	85	NA	NA	NA	FALSE	TRUE	FALSE	NA	NA	NA	FALSE	NA	NA	FALSE	FALSE	NA	NA	TRUE	NA	TRUE
42184794	Hivep1	chr13	+	42052021	42188518	4.21848e+07	63.9993	0.258706	42184630	42185014	384	Hivep1:chr13:42184630-42185014:+	Hivep1:10	42184794	42185094	37,63,232	3	42184494	42185094	NA	58,92	NA	NA	NA	214	32	NA	56	19	NA	279	NA	FALSE	NA	TRUE	NA	NA	NA	FALSE	FALSE	NA	FALSE	FALSE	NA	FALSE	TRUE	NA	TRUE
90339307	Hlf	chr11	-	90336388	90390895	9.03393e+07	48.54	1	90339166	90339458	292	Hlf:chr11:90339166-90339458:-	Hlf:2	90339007	90339307	284,69	2	90339007	90339607	7184263	108	NA	NA	41	NA	NA	NA	NA	NA	NA	NA	NA	FALSE	FALSE	TRUE	NA	NA	FALSE	NA	NA	NA	NA	NA	NA	NA	TRUE	NA	TRUE
56475376	Hmg20a	chr9	+	56418609	56496936	5.64754e+07	48.2435	1	56475223	56475512	289	Hmg20a:chr9:56475223-56475512:+	Hmg20a:9	56475376	56475676		NA	56475076	56475676	29	NA	NA	NA	NA	175	NA	41	NA	NA	180	NA	NA	FALSE	FALSE	NA	NA	NA	NA	TRUE	NA	FALSE	NA	NA	TRUE	NA	TRUE	NA	TRUE
76136056	Hmgcll1	chr9	+	76014855	76136476	7.6136e+07	62.3993	0.258832	76135841	76136215	374	Hmgcll1:chr9:76135841-76136215:+	Hmgcll1:9	76136056	76136356	293	1	76135756	76136356	166	NA	NA	264	NA	221	NA	NA	NA	274	NA	118	NA	FALSE	TRUE	NA	NA	FALSE	NA	FALSE	NA	NA	NA	FALSE	NA	TRUE	TRUE	NA	TRUE
75031585	Hmgxb4	chr8	+	74993356	75031981	7.50316e+07	126.496	0.126878	75031263	75031981	718	Hmgxb4:chr8:75031263-75031981:+	Hmgxb4:8	75031585	75031885	205237250	3	75031285	75031885	296	NA	NA	NA	176	NA	NA	NA	NA	NA	NA	NA	NA	FALSE	FALSE	NA	NA	NA	TRUE	NA	NA	NA	NA	NA	NA	NA	TRUE	NA	TRUE
103244019	Hnrnpa1	chr15	+	103240432	103246689	1.03244e+08	114.694	0.0175668	103243587	103244275	688	Hnrnpa1:chr15:103243587-103244275:+	Hnrnpa1:1	103244019	103244319	9270	2	103243719	103244319	NA	NA	NA	NA	NA	108	NA	NA	NA	NA	NA	240	NA	FALSE	NA	NA	NA	NA	NA	TRUE	NA	NA	NA	NA	NA	FALSE	TRUE	NA	TRUE
75667125	Hnrnpa3	chr2	+	75659267	75669484	7.56671e+07	68.0193	1	75666914	75667322	408	Hnrnpa3:chr2:75666914-75667322:+	Hnrnpa3:5	75667125	75667425	220	1	75666825	75667425	NA	NA	NA	NA	149	NA	68	NA	NA	191	NA	NA	NA	FALSE	NA	NA	NA	NA	TRUE	NA	FALSE	NA	NA	FALSE	NA	NA	TRUE	NA	TRUE
99961061	Hnrnpd	chr5	-	99955935	99978938	9.9961e+07	141.46	0.0744749	99960617	99961466	849	Hnrnpd:chr5:99960617-99961466:-	Hnrnpd:1	99960761	99961061	277,74,59,21,9	5	99960761	99961361	210	53	153	139	NA	NA	NA	NA	NA	39	NA	NA	NA	FALSE	FALSE	FALSE	TRUE	TRUE	NA	NA	NA	NA	NA	FALSE	NA	NA	TRUE	NA	TRUE
99962524	Hnrnpd	chr5	-	99955935	99978938	9.99625e+07	24.4897	1	99962466	99962613	147	Hnrnpd:chr5:99962466-99962613:-	Hnrnpd:2	99962224	99962524	9	1	99962224	99962824	NA	NA	155	NA	NA	213	NA	NA	23,39,56	NA	270	NA	NA	FALSE	NA	NA	TRUE	NA	NA	FALSE	NA	NA	FALSE	NA	FALSE	NA	TRUE	NA	TRUE
100036113	Hnrnpdl	chr5	-	100032574	100039222	1.00036e+08	23.961	1	100036056	100036200	144	Hnrnpdl:chr5:100036056-100036200:-	Hnrnpdl:3	100035813	100036113	10	1	100035813	100036413	174	NA	NA	NA	263	82	NA	69	NA	NA	NA	NA	NA	FALSE	TRUE	NA	NA	NA	FALSE	FALSE	NA	FALSE	NA	NA	NA	NA	TRUE	NA	TRUE
93404642	Homer1	chr13	+	93303757	93413113	9.34047e+07	138.517	0.20425	93404269	93405100	831	Homer1:chr13:93404269-93405100:+	Homer1:17	93404642	93404942	101275101275	4	93404342	93404942	NA	NA	102	NA	79	NA	NA	NA	146	NA	NA	292	286287	FALSE	NA	NA	TRUE	NA	FALSE	NA	NA	NA	TRUE	NA	NA	FALSE	TRUE	FALSE	TRUE
93405836	Homer1	chr13	+	93303757	93413113	9.34058e+07	72.577	1	93405622	93406058	436	Homer1:chr13:93405622-93406058:+	Homer1:18	93405836	93406136		NA	93405536	93406136	50106	NA	NA	NA	NA	NA	NA	NA	NA	220230	224	93	NA	FALSE	TRUE	NA	NA	NA	NA	NA	NA	NA	NA	FALSE	FALSE	TRUE	TRUE	NA	TRUE
93407057	Homer1	chr13	+	93303757	93413113	9.34071e+07	86.8083	0.65768	93406813	93407334	521	Homer1:chr13:93406813-93407334:+	Homer1:19	93407057	93407357		NA	93406757	93407357	NA	161	NA	NA	132	143	NA	NA	159	153243	221	269	263264	FALSE	NA	TRUE	NA	NA	TRUE	TRUE	NA	NA	TRUE	TRUE	FALSE	FALSE	TRUE	FALSE	TRUE
93408902	Homer1	chr13	+	93303757	93413113	9.34089e+07	85.7731	0.559014	93408641	93409156	515	Homer1:chr13:93408641-93409156:+	Homer1:20	93408902	93409202		NA	93408602	93409202	NA	NA	NA	NA	NA	165	NA	136	NA	NA	1.79184e+23	NA	210	FALSE	NA	NA	NA	NA	NA	TRUE	NA	TRUE	NA	NA	TRUE	NA	TRUE	FALSE	TRUE
81605584	Homer2	chr7	-	81600481	81692965	8.16056e+07	45.8082	1	81605434	81605709	275	Homer2:chr7:81605434-81605709:-	Homer2:1	81605284	81605584		NA	81605284	81605884	103142	NA	162	NA	156	NA	NA	150	120	NA	NA	171	NA	FALSE	TRUE	NA	TRUE	NA	TRUE	NA	NA	TRUE	TRUE	NA	NA	TRUE	TRUE	NA	TRUE
95998729	Hook1	chr4	+	95967240	96025413	9.59987e+07	28.9781	1	95998649	95998823	174	Hook1:chr4:95998649-95998823:+	Hook1:5	95998729	95999029		NA	95998429	95999029	167	182	NA	NA	95	NA	NA	NA	NA	NA	NA	NA	NA	FALSE	TRUE	FALSE	NA	NA	TRUE	NA	NA	NA	NA	NA	NA	NA	TRUE	NA	TRUE
84998752	Hook2	chr8	+	84990617	85003369	8.49988e+07	186.648	0.132218	84998206	84999326	1120	Hook2:chr8:84998206-84999326:+	Hook2:2	84998752	84999052		NA	84998452	84999052	118	NA	NA	NA	NA	NA	NA	NA	NA	NA	NA	NA	2.40241e+26	FALSE	TRUE	NA	NA	NA	NA	NA	NA	NA	NA	NA	NA	NA	TRUE	FALSE	TRUE
84998962	Hook2	chr8	+	84990617	85003369	8.49989e+07	30.4785	0.453897	84998850	84999033	183	Hook2:chr8:84998850-84999033:+	Hook2:2	84998962	84999262		NA	84998662	84999262	NA	NA	NA	NA	134	NA	NA	NA	NA	NA	NA	NA	30,31,32,33,34,35,36,37,38	FALSE	NA	NA	NA	NA	TRUE	NA	NA	NA	NA	NA	NA	NA	TRUE	FALSE	TRUE
26021560	Hook3	chr8	-	26021421	26119224	2.60216e+07	71.9092	1	26021421	26021796	375	Hook3:chr8:26021421-26021796:-	Hook3:1	26021421	26021560	92,82,27	3	26021260	26021860	NA	126	NA	NA	NA	NA	NA	NA	5	114	NA	NA	NA	FALSE	NA	TRUE	NA	NA	NA	NA	NA	NA	FALSE	TRUE	NA	NA	TRUE	NA	TRUE
26027210	Hook3	chr8	-	26021421	26119224	2.60272e+07	53.152	1	26027051	26027370	319	Hook3:chr8:26027051-26027370:-	Hook3:3	26026910	26027210		NA	26026910	26027510	NA	NA	NA	NA	NA	NA	NA	NA	NA	169	NA	164180199	NA	FALSE	NA	NA	NA	NA	NA	NA	NA	NA	NA	TRUE	NA	TRUE	TRUE	NA	TRUE
26030419	Hook3	chr8	-	26021421	26119224	2.60304e+07	64.0471	1	26030233	26030617	384	Hook3:chr8:26030233-26030617:-	Hook3:5	26030119	26030419	210	1	26030119	26030719	160	NA	NA	NA	NA	NA	NA	NA	NA	NA	NA	1.6617e+17	NA	FALSE	TRUE	NA	NA	NA	NA	NA	NA	NA	NA	NA	NA	TRUE	TRUE	NA	TRUE
60905711	Hpf1	chr8	+	60890418	60907581	6.09057e+07	30.4547	1	60905597	60905780	183	Hpf1:chr8:60905597-60905780:+	Hpf1:3	60905711	60906011	9	1	60905411	60906011	NA	NA	NA	NA	NA	14133	NA	NA	NA	NA	NA	NA	NA	FALSE	NA	NA	NA	NA	NA	TRUE	NA	NA	NA	NA	NA	NA	TRUE	NA	TRUE
65118990	Hpgds	chr6	-	65117015	65144908	6.5119e+07	77.8731	0.316081	65118757	65119224	467	Hpgds:chr6:65118757-65119224:-	Hpgds:1	65118690	65118990		NA	65118690	65119290	215	222	NA	NA	NA	247	NA	NA	220	113257	117	131135139143147	250	FALSE	FALSE	FALSE	NA	NA	NA	FALSE	NA	NA	FALSE	TRUE	TRUE	TRUE	TRUE	FALSE	TRUE
65119057	Hpgds	chr6	-	65117015	65144908	6.51187e+07	42.7442	0.0125995	65118605	65118861	256	Hpgds:chr6:65118605-65118861:-	Hpgds:1	65118757	65119057	26	1	65118757	65119357	282	289	NA	NA	NA	NA	NA	NA	287	4180	8184	198202206210214	NA	FALSE	FALSE	FALSE	NA	NA	NA	NA	NA	NA	FALSE	TRUE	FALSE	FALSE	TRUE	NA	TRUE
144427463	Hs2st1	chr3	-	144423901	144570181	1.44428e+08	28.1666	0.00247206	144427718	144427887	169	Hs2st1:chr3:144427718-144427887:-	Hs2st1:2	144427163	144427463		NA	144427163	144427763	NA	NA	NA	NA	NA	NA	NA	NA	NA	NA	134150293	NA	NA	FALSE	NA	NA	NA	NA	NA	NA	NA	NA	NA	NA	TRUE	NA	TRUE	NA	TRUE
124397668	Hs3st4	chr7	+	123982869	124398989	1.24398e+08	79.5636	0.231796	124397419	124397897	478	Hs3st4:chr7:124397419-124397897:+	Hs3st4:31	124397668	124397968	236	1	124397368	124397968	NA	NA	61	NA	NA	NA	12	NA	NA	NA	105193197201	NA	NA	FALSE	NA	NA	FALSE	NA	NA	NA	FALSE	NA	NA	NA	TRUE	NA	TRUE	NA	TRUE
124398034	Hs3st4	chr7	+	123982869	124398989	1.24398e+08	72.8125	0.768204	124397799	124398236	437	Hs3st4:chr7:124397799-124398236:+	Hs3st4:31	124398034	124398334		NA	124397734	124398334	NA	NA	NA	NA	NA	NA	NA	NA	NA	169174179184	NA	189194	NA	FALSE	NA	NA	NA	NA	NA	NA	NA	NA	NA	TRUE	NA	FALSE	TRUE	NA	TRUE
36106043	Hs6st1	chr1	+	36068400	36106446	3.61062e+07	93.5408	0.279736	36105893	36106446	553	Hs6st1:chr1:36105893-36106446:+	Hs6st1:3	36106043	36106343	277	1	36105743	36106343	231268	NA	NA	NA	260	NA	NA	NA	NA	NA	NA	95	NA	FALSE	FALSE	NA	NA	NA	FALSE	NA	NA	NA	NA	NA	NA	TRUE	TRUE	NA	TRUE
57512929	Hsf2	chr10	+	57486396	57516704	5.75129e+07	57.7269	0.223611	57512759	57513105	346	Hsf2:chr10:57512759-57513105:+	Hsf2:11	57512929	57513229	76206	2	57512629	57513229	16157	NA	NA	NA	NA	NA	NA	NA	286	192	NA	NA	NA	FALSE	TRUE	NA	NA	NA	NA	NA	NA	NA	FALSE	FALSE	NA	NA	TRUE	NA	TRUE
57513031	Hsf2	chr10	+	57486396	57516704	5.75131e+07	31.0791	0.043772	57512963	57513149	186	Hsf2:chr10:57512963-57513149:+	Hsf2:11	57513031	57513331	104	1	57512731	57513331	55253	NA	NA	NA	NA	NA	NA	NA	184	90	NA	NA	NA	FALSE	FALSE	NA	NA	NA	NA	NA	NA	NA	FALSE	TRUE	NA	NA	TRUE	NA	TRUE
40791118	Hspa4l	chr3	+	40745430	40798485	4.07911e+07	174.742	0.555848	40790584	40791632	1048	Hspa4l:chr3:40790584-40791632:+	Hspa4l:11	40791118	40791418	300	1	40790818	40791418	283	NA	NA	NA	NA	NA	NA	NA	8201	NA	96	NA	NA	FALSE	FALSE	NA	NA	NA	NA	NA	NA	NA	FALSE	NA	TRUE	NA	TRUE	NA	TRUE
8995850	Hus1	chr11	-	8993136	9011191	8.99585e+06	56.0319	1	8995681	8996017	336	Hus1:chr11:8995681-8996017:-	Hus1:2	8995550	8995850	204	1	8995550	8996150	NA	NA	NA	113	186	NA	NA	NA	NA	NA	173180	190	NA	FALSE	NA	NA	NA	TRUE	FALSE	NA	NA	NA	NA	NA	TRUE	FALSE	TRUE	NA	TRUE
69432614	Ice2	chr9	+	69397906	69434810	6.94326e+07	111.296	0.207067	69432245	69432913	668	Ice2:chr9:69432245-69432913:+	Ice2:3	69432614	69432914	20,87	2	69432314	69432914	NA	132	NA	NA	NA	NA	NA	NA	NA	NA	64	138259268	2.56257e+23	FALSE	NA	TRUE	NA	NA	NA	NA	NA	NA	NA	NA	FALSE	TRUE	TRUE	FALSE	TRUE
48263231	Id4	chr13	+	48261228	48266031	4.82634e+07	94.4253	0.0669659	48263079	48263646	567	Id4:chr13:48263079-48263646:+	Id4:3	48263231	48263531		NA	48262931	48263531	194	NA	NA	NA	NA	NA	NA	NA	152	NA	NA	NA	NA	FALSE	FALSE	NA	NA	NA	NA	NA	NA	NA	TRUE	NA	NA	NA	TRUE	NA	TRUE
48265754	Id4	chr13	+	48261228	48266031	4.82657e+07	105.587	0.311595	48265424	48266031	607	Id4:chr13:48265424-48266031:+	Id4:4	48265754	48266031	224271	2	48265454	48266054	190198	NA	100	NA	NA	NA	NA	NA	NA	254	12	NA	NA	FALSE	FALSE	NA	TRUE	NA	NA	NA	NA	NA	NA	FALSE	FALSE	NA	TRUE	NA	TRUE
37270687	Ide	chr19	-	37268730	37330613	3.72707e+07	49.1133	0.322574	37270599	37270894	295	Ide:chr19:37270599-37270894:-	Ide:2	37270387	37270687	238104	2	37270387	37270987	122	95	NA	NA	NA	NA	NA	NA	NA	87	200	NA	258259260261262	FALSE	TRUE	TRUE	NA	NA	NA	NA	NA	NA	NA	FALSE	FALSE	NA	TRUE	FALSE	TRUE
8890576	Idi1	chr13	+	8885501	8892459	8.89054e+06	101.593	1	8890233	8890843	610	Idi1:chr13:8890233-8890843:+	Idi1:1	8890576	8890876		NA	8890276	8890876	114	NA	NA	NA	NA	279	NA	NA	NA	NA	175	NA	NA	FALSE	TRUE	NA	NA	NA	NA	FALSE	NA	NA	NA	NA	TRUE	NA	TRUE	NA	TRUE
88599528	Ifna12	chr4	-	88598982	88603376	8.85995e+07	150.96	0.10242	88599084	88599989	905	Ifna12:chr4:88599084-88599989:-	Ifna12:1	88599228	88599528		NA	88599228	88599828	NA	NA	NA	NA	NA	NA	NA	NA	NA	NA	NA	139	NA	FALSE	NA	NA	NA	NA	NA	NA	NA	NA	NA	NA	NA	TRUE	TRUE	NA	TRUE
68233344	Igf1r	chr7	+	67952827	68233689	6.82334e+07	44.3917	0.130212	68233278	68233545	267	Igf1r:chr7:68233278-68233545:+	Igf1r:38	68233344	68233644	6,90,233,280	4	68233044	68233644	NA	61,99	NA	42	NA	NA	NA	NA	NA	NA	104208	NA	NA	FALSE	NA	TRUE	NA	FALSE	NA	NA	NA	NA	NA	NA	TRUE	NA	TRUE	NA	TRUE
142653614	Igf2	chr7	-	142650764	142657496	1.42654e+08	92.0259	0.810368	142653410	142653962	552	Igf2:chr7:142653410-142653962:-	Igf2:2	142653314	142653614	242,88,53,242,88,53,53	7	142653314	142653914	80,98	NA	NA	NA	68147	NA	155183	NA	NA	NA	119159	104	NA	FALSE	TRUE	NA	NA	NA	TRUE	NA	TRUE	NA	NA	NA	TRUE	TRUE	TRUE	NA	TRUE
95963336	Igf2bp1	chr11	-	95957163	96005940	9.59633e+07	158.732	0.170852	95962787	95963739	952	Igf2bp1:chr11:95962787-95963739:-	Igf2bp1:4	95963036	95963336	290209107	3	95963036	95963636	103	195	NA	NA	NA	NA	NA	NA	NA	174	NA	NA	NA	FALSE	TRUE	FALSE	NA	NA	NA	NA	NA	NA	NA	TRUE	NA	NA	TRUE	NA	TRUE
39026856	Igsf11	chr16	+	38902316	39027159	3.90268e+07	126.488	0.270902	39026452	39027159	707	Igsf11:chr16:39026452-39027159:+	Igsf11:9	39026856	39027156		NA	39026556	39027156	149	NA	NA	NA	NA	NA	NA	157	NA	153282	NA	NA	NA	FALSE	TRUE	NA	NA	NA	NA	NA	NA	TRUE	NA	TRUE	NA	NA	TRUE	NA	TRUE
19936773	Igsf23	chr7	-	19934641	19950573	1.99368e+07	35.142	1	19936646	19936857	211	Igsf23:chr7:19936646-19936857:-	Igsf23:1	19936473	19936773		NA	19936473	19937073	109	NA	NA	NA	NA	NA	NA	NA	NA	80,84,88,92,96,100	NA	NA	NA	FALSE	TRUE	NA	NA	NA	NA	NA	NA	NA	NA	TRUE	NA	NA	TRUE	NA	TRUE
108404081	Iho1	chr9	-	108402484	108428484	1.08404e+08	29.8582	0.741744	108403997	108404176	179	Iho1:chr9:108403997-108404176:-	Iho1:1	108403781	108404081		NA	108403781	108404381	NA	NA	NA	NA	125	NA	NA	NA	NA	NA	NA	106110	NA	FALSE	NA	NA	NA	NA	TRUE	NA	NA	NA	NA	NA	NA	TRUE	TRUE	NA	TRUE
91097508	Ikbip	chr10	+	91082940	91105516	9.10975e+07	28.5969	0.058463	91097398	91097569	171	Ikbip:chr10:91097398-91097569:+	Ikbip:2	91097508	91097808	42,89,102,278	4	91097208	91097808	3,60,110	NA	9	NA	NA	NA	84	NA	NA	25280	246	236241252	NA	FALSE	TRUE	NA	FALSE	NA	NA	NA	FALSE	NA	NA	FALSE	FALSE	FALSE	TRUE	NA	TRUE
22659046	Ikbkb	chr8	-	22658684	22706589	2.2659e+07	87.0235	0.0435135	22658772	22659294	522	Ikbkb:chr8:22658772-22659294:-	Ikbkb:1	22658746	22659046		NA	22658746	22659346	NA	NA	NA	NA	NA	NA	NA	NA	NA	102122126	133215	106110114118	NA	FALSE	NA	NA	NA	NA	NA	NA	NA	NA	NA	TRUE	TRUE	TRUE	TRUE	NA	TRUE
131391338	Ikzf5	chr7	-	131388169	131410521	1.31391e+08	81.3054	1	131391077	131391565	488	Ikzf5:chr7:131391077-131391565:-	Ikzf5:3	131391038	131391338		NA	131391038	131391638	255	262	NA	71235	131	NA	NA	267	NA	209	NA	NA	NA	FALSE	FALSE	FALSE	NA	FALSE	TRUE	NA	NA	FALSE	NA	FALSE	NA	NA	TRUE	NA	TRUE
42656055	Il11ra2	chr4	-	42655275	42665763	4.26562e+07	79.0152	0.685171	42655948	42656423	475	Il11ra2:chr4:42655948-42656423:-	Il11ra2:1	42655755	42656055	54	1	42655755	42656355	128	NA	NA	NA	NA	NA	NA	NA	NA	31	NA	NA	NA	FALSE	TRUE	NA	NA	NA	NA	NA	NA	NA	NA	FALSE	NA	NA	TRUE	NA	TRUE
138847116	Il1rapl2	chrX	+	137570608	138849077	1.38847e+08	34.835	1	138847013	138847222	209	Il1rapl2:chrX:138847013-138847222:+	Il1rapl2:9	138847116	138847416		NA	138846816	138847416	114	156	NA	NA	NA	NA	NA	127	275	NA	17,21,25,29,33,37,41,45,49,53,85,89	192	NA	FALSE	TRUE	TRUE	NA	NA	NA	NA	NA	TRUE	FALSE	NA	FALSE	FALSE	TRUE	NA	TRUE
47024678	Ina	chr19	+	47014698	47025327	4.70247e+07	90.6298	0.169375	47024385	47024929	544	Ina:chr19:47024385-47024929:+	Ina:3	47024678	47024978	61219267	3	47024378	47024978	NA	NA	NA	NA	177	NA	NA	NA	NA	NA	181185189196	200	NA	FALSE	NA	NA	NA	NA	TRUE	NA	NA	NA	NA	NA	FALSE	FALSE	TRUE	NA	TRUE
119416612	Inhbb	chr1	-	119415461	119422248	1.19417e+08	75.1978	0.964368	119416415	119416866	451	Inhbb:chr1:119416415-119416866:-	Inhbb:2	119416312	119416612	103	1	119416312	119416912	53	NA	NA	NA	NA	NA	NA	NA	NA	NA	167	NA	NA	FALSE	FALSE	NA	NA	NA	NA	NA	NA	NA	NA	NA	TRUE	NA	TRUE	NA	TRUE
52789000	Inpp1	chr1	-	52784688	52817688	5.2789e+07	55.9887	0.237009	52788842	52789178	336	Inpp1:chr1:52788842-52789178:-	Inpp1:2	52788700	52789000	66	1	52788700	52789300	NA	NA	NA	NA	NA	NA	NA	NA	NA	NA	73,77,89,122,131,135,139,143,147,151,155,159,163,167,171,175,179,183,187,191,195,199	NA	NA	FALSE	NA	NA	NA	NA	NA	NA	NA	NA	NA	NA	TRUE	NA	TRUE	NA	TRUE
52789196	Inpp1	chr1	-	52784688	52817688	5.27891e+07	79.8333	0.0574139	52788909	52789388	479	Inpp1:chr1:52788909-52789388:-	Inpp1:2	52788896	52789196	262,59	2	52788896	52789496	104	NA	NA	NA	42	NA	NA	NA	NA	NA	269273285	173	NA	FALSE	TRUE	NA	NA	NA	FALSE	NA	NA	NA	NA	NA	FALSE	TRUE	TRUE	NA	TRUE
124801143	Inpp5b	chr4	+	124741850	124801511	1.24801e+08	104.84	0.191898	124800886	124801511	625	Inpp5b:chr4:124800886-124801511:+	Inpp5b:3	124801143	124801443	287	1	124800843	124801443	NA	NA	125	NA	NA	NA	NA	NA	NA	NA	247	NA	NA	FALSE	NA	NA	TRUE	NA	NA	NA	NA	NA	NA	NA	FALSE	NA	TRUE	NA	TRUE
28077021	Insig1	chr5	+	28071363	28078662	2.8077e+07	94.6179	0.889731	28076740	28077307	567	Insig1:chr5:28076740-28077307:+	Insig1:1	28077021	28077321	253	1	28076721	28077321	NA	NA	NA	NA	227	NA	NA	127	NA	232	NA	NA	NA	FALSE	NA	NA	NA	NA	FALSE	NA	NA	TRUE	NA	FALSE	NA	NA	TRUE	NA	TRUE
3155334	Insr	chr8	-	3150918	3279617	3.15534e+06	58.5533	1	3155165	3155516	351	Insr:chr8:3155165-3155516:-	Insr:3	3155034	3155334	2	1	3155034	3155634	NA	NA	NA	NA	NA	NA	NA	NA	NA	NA	156	176181186	NA	FALSE	NA	NA	NA	NA	NA	NA	NA	NA	NA	NA	TRUE	TRUE	TRUE	NA	TRUE
134882072	Insyn2a	chr7	-	134881908	134938430	1.34882e+08	66.52	1	134881908	134882266	358	Insyn2a:chr7:134881908-134882266:-	Insyn2a:1	134881908	134882072		NA	134881772	134882372	145	NA	NA	NA	127	50107	NA	NA	NA	149	NA	158	NA	FALSE	TRUE	NA	NA	NA	TRUE	TRUE	NA	NA	NA	TRUE	NA	TRUE	TRUE	NA	TRUE
133110730	Ints12	chr3	+	133091840	133110988	1.33111e+08	106.695	0.188661	133110340	133110981	641	Ints12:chr3:133110340-133110981:+	Ints12:3	133110730	133110988	107215253	3	133110430	133111030	24115150	NA	NA	NA	NA	NA	NA	NA	NA	82185208232	NA	NA	NA	FALSE	TRUE	NA	NA	NA	NA	NA	NA	NA	NA	FALSE	NA	NA	TRUE	NA	TRUE
11204536	Ints8	chr4	-	11199158	11254258	11204536	46.3028	0.928885	11204397	11204674	277	Ints8:chr4:11204397-11204674:-	Ints8:3	11204236	11204536	72	1	11204236	11204836	102	215	NA	NA	130	120	NA	NA	NA	NA	NA	193203219	NA	FALSE	TRUE	FALSE	NA	NA	TRUE	TRUE	NA	NA	NA	NA	NA	FALSE	TRUE	NA	TRUE
40654244	Intu	chr3	+	40531286	40704786	4.06544e+07	150.213	0.434009	40653928	40654829	901	Intu:chr3:40653928-40654829:+	Intu:2	40654244	40654544		NA	40653944	40654544	NA	NA	NA	NA	NA	110	NA	NA	233	NA	NA	NA	NA	FALSE	NA	NA	NA	NA	NA	TRUE	NA	NA	FALSE	NA	NA	NA	TRUE	NA	TRUE
108033486	Ip6k1	chr9	+	108002501	108048782	1.08034e+08	78.477	0.990941	108033307	108033777	470	Ip6k1:chr9:108033307-108033777:+	Ip6k1:5	108033486	108033786	235	1	108033186	108033786	255	NA	NA	295	NA	NA	NA	33164	NA	215	NA	201	NA	FALSE	FALSE	NA	NA	FALSE	NA	NA	NA	TRUE	NA	FALSE	NA	FALSE	TRUE	NA	TRUE
110058231	Ipo7	chr7	+	110018274	110059406	1.10058e+08	57.2321	0.522215	110058040	110058383	343	Ipo7:chr7:110058040-110058383:+	Ipo7:6	110058231	110058531		NA	110057931	110058531	NA	108	NA	NA	NA	NA	NA	240	NA	NA	156290	161	NA	FALSE	NA	TRUE	NA	NA	NA	NA	NA	FALSE	NA	NA	TRUE	TRUE	TRUE	NA	TRUE
148770936	Ipo8	chr6	-	148770683	148831467	1.48771e+08	121.962	0.0886045	148770683	148771354	671	Ipo8:chr6:148770683-148771354:-	Ipo8:1	148770683	148770936	251209101	3	148770636	148771236	121	NA	NA	NA	79	NA	NA	NA	NA	223	NA	NA	NA	FALSE	TRUE	NA	NA	NA	FALSE	NA	NA	NA	NA	FALSE	NA	NA	TRUE	NA	TRUE
68056269	Iqcj	chr3	+	67892220	68056593	6.80563e+07	106.882	1	68055962	68056593	631	Iqcj:chr3:68055962-68056593:+	Iqcj:5	68056269	68056569		NA	68055969	68056569	NA	NA	NA	NA	NA	188	NA	NA	NA	NA	156160	NA	NA	FALSE	NA	NA	NA	NA	NA	FALSE	NA	NA	NA	NA	TRUE	NA	TRUE	NA	TRUE
80712541	Iqgap1	chr7	-	80710704	80803416	8.07127e+07	127.145	0.0937159	80712302	80713064	762	Iqgap1:chr7:80712302-80713064:-	Iqgap1:2	80712241	80712541	240	1	80712241	80712841	NA	NA	NA	NA	NA	NA	NA	NA	NA	NA	175244262	NA	254255256257	FALSE	NA	NA	NA	NA	NA	NA	NA	NA	NA	NA	TRUE	NA	TRUE	FALSE	TRUE
90662311	Iqsec1	chr6	-	90656088	90810123	9.06623e+07	71.6545	1	90662100	90662530	430	Iqsec1:chr6:90662100-90662530:-	Iqsec1:4	90662011	90662311	282209	2	90662011	90662611	NA	NA	NA	NA	NA	NA	NA	NA	262	NA	170	NA	NA	FALSE	NA	NA	NA	NA	NA	NA	NA	NA	FALSE	NA	TRUE	NA	TRUE	NA	TRUE
29537211	Irf5	chr6	+	29526625	29541875	2.95371e+07	63.7476	0.930602	29536950	29537332	382	Irf5:chr6:29536950-29537332:+	Irf5:1	29537211	29537511	27,63,108	3	29536911	29537511	NA	NA	NA	NA	NA	NA	NA	NA	77	93	NA	NA	NA	FALSE	NA	NA	NA	NA	NA	NA	NA	NA	FALSE	TRUE	NA	NA	TRUE	NA	TRUE
82237239	Irs1	chr1	-	82233081	82291416	8.22372e+07	99.8199	1	82236909	82237508	599	Irs1:chr1:82236909-82237508:-	Irs1:2	82236939	82237239	293,222,73	3	82236939	82237539	180	NA	NA	NA	57	NA	NA	102192	268	NA	NA	NA	NA	FALSE	TRUE	NA	NA	NA	FALSE	NA	NA	TRUE	FALSE	NA	NA	NA	TRUE	NA	TRUE
114954540	Itga1	chr13	-	114953096	115101964	1.14955e+08	55.0138	0.995385	114954348	114954678	330	Itga1:chr13:114954348-114954678:-	Itga1:2	114954240	114954540		NA	114954240	114954840	NA	62215	NA	NA	NA	NA	NA	NA	NA	NA	133	226	237238239	FALSE	NA	FALSE	NA	NA	NA	NA	NA	NA	NA	NA	TRUE	FALSE	TRUE	FALSE	TRUE
99769508	Itgb3bp	chr4	-	99762702	99829186	9.97695e+07	16.6104	1	99769465	99769565	100	Itgb3bp:chr4:99769465-99769565:-	Itgb3bp:3	99769208	99769508	14	1	99769208	99769808	122	NA	NA	NA	NA	NA	NA	NA	NA	NA	NA	NA	NA	FALSE	TRUE	NA	NA	NA	NA	NA	NA	NA	NA	NA	NA	NA	TRUE	NA	TRUE
30902422	Itih4	chr14	+	30886476	30905394	3.09024e+07	26.3723	1	30902347	30902506	159	Itih4:chr14:30902347-30902506:+	Itih4:1	30902422	30902722		NA	30902122	30902722	NA	NA	NA	NA	NA	NA	NA	NA	NA	224	NA	1.07112e+26	NA	FALSE	NA	NA	NA	NA	NA	NA	NA	NA	NA	FALSE	NA	TRUE	TRUE	NA	TRUE
180426959	Itpkb	chr1	+	180330485	180427193	1.80427e+08	42.2843	1	180426843	180427097	254	Itpkb:chr1:180426843-180427097:+	Itpkb:7	180426959	180427193	234	1	180426659	180427259	NA	219	NA	NA	NA	NA	NA	NA	NA	223	NA	88,95	83,84,91	FALSE	NA	FALSE	NA	NA	NA	NA	NA	NA	NA	FALSE	NA	TRUE	TRUE	FALSE	TRUE
79674573	Itprid2	chr2	+	79635352	79676424	7.96746e+07	47.0815	1	79674425	79674707	282	Itprid2:chr2:79674425-79674707:+	Itprid2:3	79674573	79674873		NA	79674273	79674873	NA	NA	NA	NA	NA	NA	NA	NA	NA	166	179	264	NA	FALSE	NA	NA	NA	NA	NA	NA	NA	NA	NA	TRUE	TRUE	FALSE	TRUE	NA	TRUE
91871172	Itsn1	chr16	+	91729353	91920597	9.18712e+07	62.4639	0.159844	91870976	91871351	375	Itsn1:chr16:91870976-91871351:+	Itsn1:13	91871172	91871472	33	1	91870872	91871472	NA	NA	NA	NA	NA	NA	NA	NA	NA	177	4183189	NA	NA	FALSE	NA	NA	NA	NA	NA	NA	NA	NA	NA	TRUE	FALSE	NA	TRUE	NA	TRUE
32098776	Iws1	chr18	+	32067741	32104331	3.20988e+07	43.125	0.450521	32098652	32098910	258	Iws1:chr18:32098652-32098910:+	Iws1:16	32098776	32099076	92,92	2	32098476	32099076	173	NA	NA	207	218	NA	NA	NA	NA	NA	194	NA	NA	FALSE	TRUE	NA	NA	FALSE	FALSE	NA	NA	NA	NA	NA	FALSE	NA	TRUE	NA	TRUE
41614082	Jade1	chr3	+	41555731	41619350	4.16141e+07	55.3881	0.710284	41613921	41614253	332	Jade1:chr3:41613921-41614253:+	Jade1:3	41614082	41614382	22,50,79,206,291	5	41613782	41614382	NA	65167	NA	NA	NA	NA	158	186	NA	NA	NA	182	NA	FALSE	NA	TRUE	NA	NA	NA	NA	TRUE	FALSE	NA	NA	NA	FALSE	TRUE	NA	TRUE
41616443	Jade1	chr3	+	41555731	41619350	4.16164e+07	108.305	0.0127098	41616087	41616737	650	Jade1:chr3:41616087-41616737:+	Jade1:5	41616443	41616743	68,84,210	3	41616143	41616743	59102	46	NA	NA	NA	NA	184	63	NA	NA	NA	233	NA	FALSE	TRUE	FALSE	NA	NA	NA	NA	FALSE	FALSE	NA	NA	NA	FALSE	TRUE	NA	TRUE
71688121	Jak3	chr8	+	71676296	71690577	7.16881e+07	59.0964	1	71687958	71688312	354	Jak3:chr8:71687958-71688312:+	Jak3:1	71688121	71688421	41	1	71687821	71688421	NA	NA	NA	NA	169	NA	NA	NA	NA	NA	NA	NA	NA	FALSE	NA	NA	NA	NA	TRUE	NA	NA	NA	NA	NA	NA	NA	TRUE	NA	TRUE
84823614	Jam2	chr16	+	84774123	84826380	8.48236e+07	63.9723	1	84823433	84823817	384	Jam2:chr16:84823433-84823817:+	Jam2:9	84823614	84823914		NA	84823314	84823914	NA	NA	NA	208	177	NA	NA	NA	NA	NA	NA	1.82186e+17	NA	FALSE	NA	NA	NA	FALSE	TRUE	NA	NA	NA	NA	NA	NA	FALSE	TRUE	NA	TRUE
44920195	Jarid2	chr13	+	44731271	44921657	4.49202e+07	75.9017	0.0888755	44920009	44920464	455	Jarid2:chr13:44920009-44920464:+	Jarid2:15	44920195	44920495	101	1	44919895	44920495	136	NA	NA	NA	NA	NA	NA	NA	NA	84	226	129	NA	FALSE	TRUE	NA	NA	NA	NA	NA	NA	NA	NA	FALSE	FALSE	TRUE	TRUE	NA	TRUE
52770298	Jazf1	chr6	-	52767685	53068631	5.27703e+07	45.2266	0.201558	52770166	52770437	271	Jazf1:chr6:52770166-52770437:-	Jazf1:2	52769998	52770298	228	1	52769998	52770598	NA	NA	NA	NA	202	NA	NA	191	NA	NA	117	NA	NA	FALSE	NA	NA	NA	NA	FALSE	NA	NA	FALSE	NA	NA	TRUE	NA	TRUE	NA	TRUE
24942969	Jpt2	chr17	-	24940687	24960689	2.4943e+07	111.04	0.0380753	24942641	24943307	666	Jpt2:chr17:24942641-24943307:-	Jpt2:1	24942669	24942969	225,201,95,46	4	24942669	24943269	NA	NA	173	100	NA	NA	NA	NA	NA	NA	90	NA	NA	FALSE	NA	NA	TRUE	TRUE	NA	NA	NA	NA	NA	NA	TRUE	NA	TRUE	NA	TRUE
152294991	Kantr	chrX	-	152294824	152327495	1.52295e+08	54.0191	1	152294824	152295147	323	Kantr:chrX:152294824-152295147:-	Kantr:1	152294824	152294991		NA	152294691	152295291	NA	NA	4	NA	NA	NA	NA	NA	NA	142158	NA	NA	NA	FALSE	NA	NA	FALSE	NA	NA	NA	NA	NA	NA	TRUE	NA	NA	TRUE	NA	TRUE
53672413	Kat2b	chr17	+	53566971	53672889	5.36724e+07	111.703	0.147171	53672077	53672747	670	Kat2b:chr17:53672077-53672747:+	Kat2b:17	53672413	53672713	109234	2	53672113	53672713	2103154285	NA	NA	NA	NA	NA	NA	NA	259	187	NA	NA	NA	FALSE	TRUE	NA	NA	NA	NA	NA	NA	NA	FALSE	FALSE	NA	NA	TRUE	NA	TRUE
5603172	Kat5	chr19	-	5603014	5610237	5.60317e+06	67.2634	1	5603014	5603373	359	Kat5:chr19:5603014-5603373:-	Kat5:1	5603014	5603172	107,56,45	3	5602872	5603472	NA	70	NA	NA	NA	NA	NA	NA	NA	137	NA	NA	NA	FALSE	NA	FALSE	NA	NA	NA	NA	NA	NA	NA	TRUE	NA	NA	TRUE	NA	TRUE
95129442	Kbtbd8	chr6	+	95117740	95129793	9.51294e+07	104.705	0.344087	95129088	95129717	629	Kbtbd8:chr6:95129088-95129717:+	Kbtbd8:1	95129442	95129742	217276	2	95129142	95129742	130	NA	NA	NA	258	NA	NA	243	NA	192	NA	NA	NA	FALSE	TRUE	NA	NA	NA	FALSE	NA	NA	FALSE	NA	FALSE	NA	NA	TRUE	NA	TRUE
152391013	Kcnab2	chr4	-	152390742	152448840	1.52391e+08	101.037	0.240856	152390742	152391301	559	Kcnab2:chr4:152390742-152391301:-	Kcnab2:1	152390742	152391013	268,258,227,211,108,44	6	152390713	152391313	133	NA	NA	NA	NA	NA	NA	NA	NA	244	NA	NA	NA	FALSE	TRUE	NA	NA	NA	NA	NA	NA	NA	NA	FALSE	NA	NA	TRUE	NA	TRUE
15716584	Kcnb2	chr1	+	15312452	15723750	1.57166e+07	48.2027	1	15716444	15716733	289	Kcnb2:chr1:15716444-15716733:+	Kcnb2:62	15716584	15716884		NA	15716284	15716884	119210	NA	NA	NA	NA	NA	172	200	NA	NA	123133167177	NA	NA	FALSE	TRUE	NA	NA	NA	NA	NA	TRUE	FALSE	NA	NA	TRUE	NA	TRUE	NA	TRUE
15718896	Kcnb2	chr1	+	15312452	15723750	1.57189e+07	61.6914	1	15718704	15719075	371	Kcnb2:chr1:15718704-15719075:+	Kcnb2:63	15718896	15719196		NA	15718596	15719196	21253	NA	NA	275	2268	NA	122	NA	110	104	175179186	NA	NA	FALSE	FALSE	NA	NA	FALSE	FALSE	NA	TRUE	NA	TRUE	TRUE	TRUE	NA	TRUE	NA	TRUE
46438019	Kcnc1	chr7	+	46396497	46438704	4.64381e+07	87.7122	0.885026	46437862	46438388	526	Kcnc1:chr7:46437862-46438388:+	Kcnc1:3	46438019	46438319	239269	2	46437719	46438319	NA	NA	NA	NA	NA	260	NA	NA	NA	268272281286	276290	107	NA	FALSE	NA	NA	NA	NA	NA	FALSE	NA	NA	NA	FALSE	FALSE	TRUE	TRUE	NA	TRUE
21727469	Kcnd2	chr6	+	21215503	21729805	2.17275e+07	84.9185	0.435391	21727221	21727730	509	Kcnd2:chr6:21727221-21727730:+	Kcnd2:42	21727469	21727769	208	1	21727169	21727769	NA	NA	246	NA	NA	NA	NA	122	NA	169178	NA	174183220	218	FALSE	NA	NA	FALSE	NA	NA	NA	NA	TRUE	NA	TRUE	NA	TRUE	TRUE	FALSE	TRUE
62693562	Kcnh7	chr2	-	62693414	63184287	6.26937e+07	83.1093	0.177651	62693414	62693912	498	Kcnh7:chr2:62693414-62693912:-	Kcnh7:1	62693414	62693562	106	1	62693262	62693862	NA	128	NA	NA	88	NA	NA	NA	NA	132	NA	39	NA	FALSE	NA	TRUE	NA	NA	FALSE	NA	NA	NA	NA	TRUE	NA	FALSE	TRUE	NA	TRUE
62699492	Kcnh7	chr2	-	62693414	63184287	6.26995e+07	65.6253	1	62699292	62699686	394	Kcnh7:chr2:62699292-62699686:-	Kcnh7:2	62699192	62699492		NA	62699192	62699792	NA	NA	NA	NA	NA	NA	NA	NA	NA	NA	1.63167e+35	NA	NA	FALSE	NA	NA	NA	NA	NA	NA	NA	NA	NA	NA	TRUE	NA	TRUE	NA	TRUE
62787546	Kcnh7	chr2	-	62693414	63184287	6.27876e+07	82.1248	0.840143	62787363	62787855	492	Kcnh7:chr2:62787363-62787855:-	Kcnh7:19	62787246	62787546		NA	62787246	62787846	NA	NA	NA	89	NA	239	6	94	10	NA	NA	NA	NA	FALSE	NA	NA	NA	FALSE	NA	FALSE	FALSE	TRUE	FALSE	NA	NA	NA	TRUE	NA	TRUE
62787640	Kcnh7	chr2	-	62693414	63184287	6.27879e+07	46.9305	0.159857	62787727	62788008	281	Kcnh7:chr2:62787727-62788008:-	Kcnh7:19	62787340	62787640		NA	62787340	62787940	NA	NA	NA	183	NA	NA	100	188	104	NA	NA	NA	NA	FALSE	NA	NA	NA	FALSE	NA	NA	TRUE	FALSE	TRUE	NA	NA	NA	TRUE	NA	TRUE
98434320	Kcnk10	chr12	-	98429435	98578310	98434320	73.5742	0.0703885	98434099	98434540	441	Kcnk10:chr12:98434099-98434540:-	Kcnk10:2	98434020	98434320		NA	98434020	98434620	NA	NA	NA	136	NA	NA	NA	49	NA	NA	NA	NA	NA	FALSE	NA	NA	NA	TRUE	NA	NA	NA	FALSE	NA	NA	NA	NA	TRUE	NA	TRUE
32199072	Kcnmb2	chr3	+	31902696	32200180	3.21991e+07	85.8316	0.512806	32198825	32199340	515	Kcnmb2:chr3:32198825-32199340:+	Kcnmb2:7	32199072	32199372	252252	2	32198772	32199372	251	NA	NA	NA	NA	187	NA	NA	94	NA	NA	NA	219220221222	FALSE	FALSE	NA	NA	NA	NA	FALSE	NA	NA	TRUE	NA	NA	NA	TRUE	FALSE	TRUE
65989541	Kcnq3	chr15	-	65986376	66286642	6.59896e+07	50.9261	1	65989400	65989705	305	Kcnq3:chr15:65989400-65989705:-	Kcnq3:2	65989241	65989541		NA	65989241	65989841	NA	NA	NA	NA	154	NA	NA	NA	NA	NA	NA	NA	NA	FALSE	NA	NA	NA	NA	TRUE	NA	NA	NA	NA	NA	NA	NA	TRUE	NA	TRUE
45108064	Kcnv1	chr15	-	45096083	45114827	4.51081e+07	143.117	0.521675	45107636	45108495	859	Kcnv1:chr15:45107636-45108495:-	Kcnv1:1	45107764	45108064	269	1	45107764	45108364	128	NA	NA	NA	113291	NA	NA	NA	107	228245249	137	37188	NA	FALSE	TRUE	NA	NA	NA	TRUE	NA	NA	NA	TRUE	FALSE	TRUE	FALSE	TRUE	NA	TRUE
102979146	Kctd12	chr14	-	102976561	102982637	1.02979e+08	78.2413	0.413014	102978922	102979391	469	Kctd12:chr14:102978922-102979391:-	Kctd12:2	102978846	102979146		NA	102978846	102979446	NA	NA	NA	NA	NA	NA	NA	NA	NA	188	172176	NA	NA	FALSE	NA	NA	NA	NA	NA	NA	NA	NA	NA	FALSE	TRUE	NA	TRUE	NA	TRUE
69109980	Kctd8	chr5	-	69109285	69341679	6.911e+07	88.7291	0.417125	69109729	69110261	532	Kctd8:chr5:69109729-69110261:-	Kctd8:1	69109680	69109980	257	1	69109680	69110280	72	221	NA	205	180	NA	NA	NA	60197213	28,87,129,188,225,229	139171	209	NA	FALSE	FALSE	FALSE	NA	FALSE	TRUE	NA	NA	NA	FALSE	TRUE	TRUE	FALSE	TRUE	NA	TRUE
4316790	Kdm2a	chr19	-	4314419	4398285	4.31681e+06	63.9817	0.965918	4316615	4316999	384	Kdm2a:chr19:4316615-4316999:-	Kdm2a:1	4316490	4316790	251221	2	4316490	4317090	259	195	NA	NA	212	NA	NA	NA	193	231235	160	NA	NA	FALSE	FALSE	FALSE	NA	NA	FALSE	NA	NA	NA	FALSE	FALSE	TRUE	NA	TRUE	NA	TRUE
34838917	Kdm3b	chr18	+	34777047	34839370	3.48388e+07	73.9449	0.932775	34838574	34839018	444	Kdm3b:chr18:34838574-34839018:+	Kdm3b:15	34838917	34839217	79,94	2	34838617	34839217	NA	NA	NA	NA	62	NA	NA	NA	NA	NA	128	74	NA	FALSE	NA	NA	NA	NA	FALSE	NA	NA	NA	NA	NA	TRUE	FALSE	TRUE	NA	TRUE
120442752	Kdm5a	chr6	+	120364124	120444574	1.20443e+08	101.104	0.580634	120442494	120443101	607	Kdm5a:chr6:120442494-120443101:+	Kdm5a:26	120442752	120443052		NA	120442452	120443052	NA	121	NA	NA	290	NA	NA	NA	119	NA	72125271	NA	2.48249e+23	FALSE	NA	TRUE	NA	NA	FALSE	NA	NA	NA	TRUE	NA	TRUE	NA	TRUE	FALSE	TRUE
152273424	Kdm5c	chrX	+	152233229	152279099	1.52274e+08	135.584	0.410392	152273176	152273989	813	Kdm5c:chrX:152273176-152273989:+	Kdm5c:16	152273424	152273724	106	1	152273124	152273724	177	NA	NA	NA	NA	NA	NA	181	NA	NA	NA	NA	NA	FALSE	TRUE	NA	NA	NA	NA	NA	NA	FALSE	NA	NA	NA	NA	TRUE	NA	TRUE
152274334	Kdm5c	chrX	+	152233229	152279099	1.52274e+08	68.0955	1	152274137	152274546	409	Kdm5c:chrX:152274137-152274546:+	Kdm5c:17	152274334	152274634	206	1	152274034	152274634	NA	178	NA	NA	NA	NA	NA	182	NA	NA	NA	NA	NA	FALSE	NA	TRUE	NA	NA	NA	NA	NA	FALSE	NA	NA	NA	NA	TRUE	NA	TRUE
39139479	Kdm7a	chr6	-	39136620	39206789	3.91395e+07	64.4125	0.0397996	39139293	39139679	386	Kdm7a:chr6:39139293-39139679:-	Kdm7a:2	39139179	39139479		NA	39139179	39139779	NA	NA	NA	NA	NA	81	NA	NA	87	NA	173179	NA	NA	FALSE	NA	NA	NA	NA	NA	FALSE	NA	NA	FALSE	NA	TRUE	NA	TRUE	NA	TRUE
32243934	Khdrbs2	chr1	+	32172714	32658569	3.2244e+07	48.4486	1	32243814	32244105	291	Khdrbs2:chr1:32243814-32244105:+	Khdrbs2:5	32243934	32244234		NA	32243634	32244234	NA	NA	150	46	NA	NA	NA	NA	NA	NA	9,14	38141	NA	FALSE	NA	NA	TRUE	FALSE	NA	NA	NA	NA	NA	NA	FALSE	TRUE	TRUE	NA	TRUE
32244554	Khdrbs2	chr1	+	32172714	32658569	3.22446e+07	105.24	1	32244279	32244910	631	Khdrbs2:chr1:32244279-32244910:+	Khdrbs2:6	32244554	32244854		NA	32244254	32244854	22	NA	154	NA	NA	NA	NA	183292	97223	140179207273277	NA	NA	NA	FALSE	FALSE	NA	TRUE	NA	NA	NA	NA	FALSE	TRUE	TRUE	NA	NA	TRUE	NA	TRUE
37421447	Kif11	chr19	+	37376403	37421874	37421447	98.1436	0.15253	37421152	37421741	589	Kif11:chr19:37421152-37421741:+	Kif11:13	37421447	37421747	216	1	37421147	37421747	NA	NA	NA	295	NA	NA	NA	NA	NA	282	158222	153175	NA	FALSE	NA	NA	NA	FALSE	NA	NA	NA	NA	NA	FALSE	TRUE	TRUE	TRUE	NA	TRUE
149178173	Kif1b	chr4	-	149176156	149307692	1.49178e+08	56.1158	1	149178009	149178345	336	Kif1b:chr4:149178009-149178345:-	Kif1b:3	149177873	149178173		NA	149177873	149178473	85113134	NA	NA	NA	NA	NA	NA	213	NA	NA	NA	1.38142e+17	NA	FALSE	TRUE	NA	NA	NA	NA	NA	NA	FALSE	NA	NA	NA	TRUE	TRUE	NA	TRUE
90934327	Kif21a	chr15	-	90933225	91049948	9.09343e+07	85.0492	0.598568	90934024	90934535	511	Kif21a:chr15:90934024-90934535:-	Kif21a:2	90934027	90934327	213,95,57,32	4	90934027	90934627	NA	129159	NA	NA	NA	NA	NA	NA	NA	13192	NA	NA	285286	FALSE	NA	TRUE	NA	NA	NA	NA	NA	NA	NA	FALSE	NA	NA	TRUE	FALSE	TRUE
24660776	Klf11	chr12	+	24651274	24662789	2.46607e+07	47.8938	0.316903	24660508	24660795	287	Klf11:chr12:24660508-24660795:+	Klf11:1	24660776	24661076	23,70	2	24660476	24661076	NA	139	NA	NA	NA	NA	NA	NA	NA	51	5	36216	NA	FALSE	NA	TRUE	NA	NA	NA	NA	NA	NA	NA	FALSE	FALSE	FALSE	TRUE	NA	TRUE
24660853	Klf11	chr12	+	24651274	24662789	2.46609e+07	89.1789	0.236296	24660606	24661141	535	Klf11:chr12:24660606-24661141:+	Klf11:1	24660853	24661153	269286	2	24660553	24661153	NA	62	NA	NA	NA	NA	NA	NA	NA	257281	NA	139	NA	FALSE	NA	FALSE	NA	NA	NA	NA	NA	NA	NA	FALSE	NA	TRUE	TRUE	NA	TRUE
99872366	Klf12	chr14	-	99866161	100284679	9.98724e+07	68.2826	1	99872154	99872564	410	Klf12:chr14:99872154-99872564:-	Klf12:3	99872066	99872366		NA	99872066	99872666	NA	NA	NA	NA	NA	NA	103	NA	NA	NA	203	NA	NA	FALSE	NA	NA	NA	NA	NA	NA	TRUE	NA	NA	NA	FALSE	NA	TRUE	NA	TRUE
64832536	Klf3	chr5	+	64803388	64832922	6.48326e+07	130.728	0.24102	64832173	64832922	749	Klf3:chr5:64832173-64832922:+	Klf3:10	64832536	64832836	109210	2	64832236	64832836	NA	59	NA	278	NA	NA	186	NA	91	81	NA	NA	NA	FALSE	NA	FALSE	NA	FALSE	NA	NA	FALSE	NA	TRUE	FALSE	NA	NA	TRUE	NA	TRUE
55528056	Klf4	chr4	-	55525310	55532466	5.55281e+07	51.6727	0.600804	55527911	55528221	310	Klf4:chr4:55527911-55528221:-	Klf4:1	55527756	55528056		NA	55527756	55528356	NA	NA	NA	NA	NA	NA	127	NA	NA	NA	165	133137141149153	NA	FALSE	NA	NA	NA	NA	NA	NA	TRUE	NA	NA	NA	TRUE	TRUE	TRUE	NA	TRUE
99303467	Klf5	chr14	+	99298691	99315047	9.93035e+07	17.4881	1	99303403	99303508	105	Klf5:chr14:99303403-99303508:+	Klf5:1	99303467	99303767		NA	99303167	99303767	72291	NA	NA	NA	NA	NA	NA	NA	NA	NA	179	NA	NA	FALSE	FALSE	NA	NA	NA	NA	NA	NA	NA	NA	NA	TRUE	NA	TRUE	NA	TRUE
64035757	Klf7	chr1	-	64029447	64121491	6.40358e+07	10.3732	0.310365	64035719	64035781	62	Klf7:chr1:64035719-64035781:-	Klf7:5	64035457	64035757		NA	64035457	64036057	NA	NA	NA	NA	NA	81	NA	NA	NA	65	210	45,50,71,75,105	83,84,85,86,87,88	FALSE	NA	NA	NA	NA	NA	FALSE	NA	NA	NA	FALSE	FALSE	TRUE	TRUE	FALSE	TRUE
153395553	Klf8	chrX	+	153237748	153398928	1.53396e+08	44.6327	0.365914	153395487	153395755	268	Klf8:chrX:153395487-153395755:+	Klf8:9	153395553	153395853	242	1	153395253	153395853	221	NA	NA	NA	NA	NA	NA	NA	NA	225	143	NA	NA	FALSE	FALSE	NA	NA	NA	NA	NA	NA	NA	NA	FALSE	TRUE	NA	TRUE	NA	TRUE
94253090	Klhl15	chrX	+	94234987	94277814	94253090	23.9739	0.413538	94253018	94253161	143	Klhl15:chrX:94253018-94253161:+	Klhl15:4	94253090	94253390		NA	94252790	94253390	75196	NA	NA	NA	NA	NA	NA	NA	NA	222	123	NA	NA	FALSE	FALSE	NA	NA	NA	NA	NA	NA	NA	NA	FALSE	TRUE	NA	TRUE	NA	TRUE
161089590	Klhl20	chr1	-	161087041	161131511	1.6109e+08	59.6116	1	161089399	161089756	357	Klhl20:chr1:161089399-161089756:-	Klhl20:2	161089290	161089590		NA	161089290	161089890	207	279	NA	NA	189	NA	245	195	179	NA	218	NA	NA	FALSE	FALSE	FALSE	NA	NA	FALSE	NA	FALSE	FALSE	TRUE	NA	FALSE	NA	TRUE	NA	TRUE
69835099	Klhl23	chr2	+	69822370	69836651	6.98351e+07	88.1338	1	69834842	69835371	529	Klhl23:chr2:69834842-69835371:+	Klhl23:5	69835099	69835399	231298	2	69834799	69835399	173200271	NA	NA	NA	NA	NA	NA	NA	NA	204275	NA	NA	NA	FALSE	TRUE	NA	NA	NA	NA	NA	NA	NA	NA	FALSE	NA	NA	TRUE	NA	TRUE
20123023	Klhl24	chr16	+	20097542	20129240	2.0123e+07	76.042	1	20122807	20123264	457	Klhl24:chr16:20122807-20123264:+	Klhl24:4	20123023	20123323	207	1	20122723	20123323	138	NA	NA	172232	NA	NA	84	NA	NA	180	176	NA	NA	FALSE	TRUE	NA	NA	TRUE	NA	NA	FALSE	NA	NA	TRUE	TRUE	NA	TRUE	NA	TRUE
20125190	Klhl24	chr16	+	20097542	20129240	2.0125e+07	37.4213	0.0144039	20124861	20125086	225	Klhl24:chr16:20124861-20125086:+	Klhl24:6	20125190	20125490	203278290	3	20124890	20125490	NA	177255	NA	245	NA	273	NA	NA	249	NA	NA	164	NA	FALSE	NA	TRUE	NA	FALSE	NA	FALSE	NA	NA	FALSE	NA	NA	TRUE	TRUE	NA	TRUE
64941277	Klhl28	chr12	-	64938797	64965534	6.49413e+07	63.2166	1	64941102	64941482	380	Klhl28:chr12:64941102-64941482:-	Klhl28:2	64940977	64941277		NA	64940977	64941577	NA	148158	NA	NA	NA	NA	NA	NA	193	NA	NA	141	NA	FALSE	NA	TRUE	NA	NA	NA	NA	NA	NA	FALSE	NA	NA	TRUE	TRUE	NA	TRUE
5079353	Klhl29	chr12	-	5077142	5375682	5.07932e+06	76.8556	0.393192	5079086	5079547	461	Klhl29:chr12:5079086-5079547:-	Klhl29:3	5079053	5079353	271258	2	5079053	5079653	NA	170	NA	NA	NA	NA	NA	NA	241	237	NA	NA	NA	FALSE	NA	TRUE	NA	NA	NA	NA	NA	NA	FALSE	FALSE	NA	NA	TRUE	NA	TRUE
65167287	Klhl5	chr5	+	65131075	65171294	6.51671e+07	41.5139	0.00543427	65166983	65167232	249	Klhl5:chr5:65166983-65167232:+	Klhl5:11	65167287	65167587	229257	2	65166987	65167587	NA	NA	NA	NA	222	NA	108178	NA	NA	200242	204	NA	NA	FALSE	NA	NA	NA	NA	FALSE	NA	TRUE	NA	NA	FALSE	FALSE	NA	TRUE	NA	TRUE
3808187	Kmt5b	chr19	+	3767421	3818321	3.80818e+06	97.9872	0.301334	3807887	3808475	588	Kmt5b:chr19:3807887-3808475:+	Kmt5b:16	3808187	3808487		NA	3807887	3808487	NA	NA	NA	NA	NA	NA	NA	NA	NA	NA	171	151	NA	FALSE	NA	NA	NA	NA	NA	NA	NA	NA	NA	NA	TRUE	TRUE	TRUE	NA	TRUE
3815957	Kmt5b	chr19	+	3767421	3818321	3.81581e+06	31.514	0.0175704	3815713	3815902	189	Kmt5b:chr19:3815713-3815902:+	Kmt5b:19	3815957	3816257		NA	3815657	3816257	NA	NA	NA	NA	290	NA	NA	NA	NA	NA	170	NA	NA	FALSE	NA	NA	NA	NA	FALSE	NA	NA	NA	NA	NA	TRUE	NA	TRUE	NA	TRUE
69073034	Kpna4	chr3	-	69067149	69127113	6.9073e+07	49.6282	0.293195	69072881	69073179	298	Kpna4:chr3:69072881-69073179:-	Kpna4:3	69072734	69073034	250205	2	69072734	69073334	79	NA	NA	NA	NA	NA	NA	NA	NA	167	42	NA	NA	FALSE	FALSE	NA	NA	NA	NA	NA	NA	NA	NA	TRUE	FALSE	NA	TRUE	NA	TRUE
69073091	Kpna4	chr3	-	69067149	69127113	6.90731e+07	149.222	0.706805	69072608	69073504	896	Kpna4:chr3:69072608-69073504:-	Kpna4:3	69072791	69073091	262,48	2	69072791	69073391	136	NA	NA	30	NA	49	NA	NA	NA	224	99	NA	NA	FALSE	TRUE	NA	NA	FALSE	NA	FALSE	NA	NA	NA	FALSE	TRUE	NA	TRUE	NA	TRUE
73853880	L1cam	chrX	-	73853771	73869905	7.38539e+07	45.3989	0.36512	73853771	73854028	257	L1cam:chrX:73853771-73854028:-	L1cam:1	73853771	73853880	102,34	2	73853580	73854180	NA	NA	NA	NA	NA	NA	NA	98	NA	30,84	NA	34,38	NA	FALSE	NA	NA	NA	NA	NA	NA	NA	TRUE	NA	FALSE	NA	FALSE	TRUE	NA	TRUE
69692365	L2hgdh	chr12	-	69690371	69724873	6.96924e+07	54.3964	1	69692197	69692523	326	L2hgdh:chr12:69692197-69692523:-	L2hgdh:2	69692065	69692365	205	1	69692065	69692665	131229	NA	NA	NA	NA	NA	NA	NA	NA	183	147260	256	NA	FALSE	TRUE	NA	NA	NA	NA	NA	NA	NA	NA	FALSE	TRUE	FALSE	TRUE	NA	TRUE
74352882	Lage3	chrX	-	74350305	74353618	7.43529e+07	59.5905	0.0325961	74352716	74353074	358	Lage3:chrX:74352716-74353074:-	Lage3:1	74352582	74352882	37,37	2	74352582	74353182	NA	NA	NA	NA	NA	NA	NA	NA	NA	NA	177	NA	NA	FALSE	NA	NA	NA	NA	NA	NA	NA	NA	NA	NA	TRUE	NA	TRUE	NA	TRUE
31330825	Lamb1	chr12	+	31265293	31331729	3.13308e+07	32.5827	1	31330733	31330928	195	Lamb1:chr12:31330733-31330928:+	Lamb1:7	31330825	31331125	67	1	31330525	31331125	NA	NA	NA	NA	177	133	NA	NA	NA	NA	NA	NA	NA	FALSE	NA	NA	NA	NA	TRUE	TRUE	NA	NA	NA	NA	NA	NA	TRUE	NA	TRUE
38421293	Lamp2	chrX	-	38398718	38456454	3.84213e+07	84.4988	0.431389	38421049	38421556	507	Lamp2:chrX:38421049-38421556:-	Lamp2:5	38420993	38421293	108,91	2	38420993	38421593	173203	NA	NA	NA	NA	65	NA	288	NA	NA	NA	126	NA	FALSE	TRUE	NA	NA	NA	NA	FALSE	NA	FALSE	NA	NA	NA	TRUE	TRUE	NA	TRUE
72939720	Lbh	chr17	+	72918305	72943778	7.29397e+07	63.3949	0.296319	72939543	72939924	381	Lbh:chr17:72939543-72939924:+	Lbh:3	72939720	72940020	52208	2	72939420	72940020	188	NA	NA	NA	NA	NA	NA	NA	NA	NA	121	158163168173	NA	FALSE	FALSE	NA	NA	NA	NA	NA	NA	NA	NA	NA	TRUE	TRUE	TRUE	NA	TRUE
121137377	Lcmt2	chr2	-	121128307	121140653	1.21137e+08	73.0797	0.935041	121137203	121137641	438	Lcmt2:chr2:121137203-121137641:-	Lcmt2:1	121137077	121137377		NA	121137077	121137677	105	NA	NA	NA	NA	NA	NA	NA	NA	70,74,78	112	NA	86,87,88,89,90,91,92	FALSE	TRUE	NA	NA	NA	NA	NA	NA	NA	NA	FALSE	TRUE	NA	TRUE	FALSE	TRUE
41596007	Lcor	chr19	+	41482637	41596160	4.1596e+07	57.6987	0.528228	41595840	41596160	320	Lcor:chr19:41595840-41596160:+	Lcor:28	41596007	41596160	1	1	41595707	41596307	NA	NA	NA	NA	134	NA	NA	NA	NA	NA	NA	NA	NA	FALSE	NA	NA	NA	NA	TRUE	NA	NA	NA	NA	NA	NA	NA	TRUE	NA	TRUE
45731121	Lcorl	chr5	-	45697181	45857615	4.57311e+07	83.4509	0.240656	45730846	45731346	500	Lcorl:chr5:45730846-45731346:-	Lcorl:11	45730821	45731121	93	1	45730821	45731421	85218291	NA	NA	NA	50	281	NA	154	NA	223	240	NA	NA	FALSE	FALSE	NA	NA	NA	FALSE	FALSE	NA	TRUE	NA	FALSE	FALSE	NA	TRUE	NA	TRUE
44472963	Ldb2	chr5	-	44472123	44799639	4.4473e+07	59.3116	1	44472782	44473137	355	Ldb2:chr5:44472782-44473137:-	Ldb2:2	44472663	44472963		NA	44472663	44473263	NA	NA	NA	NA	NA	166	NA	NA	NA	NA	174179184	NA	NA	FALSE	NA	NA	NA	NA	NA	TRUE	NA	NA	NA	NA	TRUE	NA	TRUE	NA	TRUE
65685410	Lekr1	chr3	+	65666228	65831355	6.56854e+07	43.6241	0.489183	65685270	65685532	262	Lekr1:chr3:65685270-65685532:+	Lekr1:2	65685410	65685710		NA	65685110	65685710	180212	NA	NA	NA	NA	NA	NA	NA	NA	NA	156	66188	NA	FALSE	TRUE	NA	NA	NA	NA	NA	NA	NA	NA	NA	TRUE	FALSE	TRUE	NA	TRUE
101811884	Lepr	chr4	+	101717404	101819179	1.01812e+08	30.9868	1	101811774	101811960	186	Lepr:chr4:101811774-101811960:+	Lepr:1	101811884	101812184		NA	101811584	101812184	NA	NA	124136	NA	112151	NA	NA	57	NA	116140144	NA	NA	NA	FALSE	NA	NA	TRUE	NA	TRUE	NA	NA	FALSE	NA	TRUE	NA	NA	TRUE	NA	TRUE
20826459	Lgalsl	chr11	-	20823332	20831056	2.08265e+07	37.9695	0.440582	20826336	20826564	228	Lgalsl:chr11:20826336-20826564:-	Lgalsl:2	20826159	20826459		NA	20826159	20826759	91	NA	NA	46	NA	NA	NA	NA	NA	NA	180269281	185191	NA	FALSE	TRUE	NA	NA	FALSE	NA	NA	NA	NA	NA	NA	TRUE	FALSE	TRUE	NA	TRUE
28583015	Lhfpl5	chr17	+	28575641	28585679	2.8583e+07	59.507	0.110404	28582814	28583171	357	Lhfpl5:chr17:28582814-28583171:+	Lhfpl5:1	28583015	28583315	10,10	2	28582715	28583315	NA	NA	NA	NA	NA	NA	274	NA	NA	NA	171	NA	NA	FALSE	NA	NA	NA	NA	NA	NA	FALSE	NA	NA	NA	TRUE	NA	TRUE	NA	TRUE
120440538	Lhx5	chr5	+	120431699	120441457	1.20441e+08	60.0785	0.0932553	120440355	120440715	360	Lhx5:chr5:120440355-120440715:+	Lhx5:1	120440538	120440838	208	1	120440238	120440838	121	NA	NA	NA	NA	NA	NA	NA	NA	NA	129133161165	NA	NA	FALSE	TRUE	NA	NA	NA	NA	NA	NA	NA	NA	NA	TRUE	NA	TRUE	NA	TRUE
36082283	Lhx6	chr2	-	36081953	36104060	3.60822e+07	84.1016	0.337725	36081953	36082436	483	Lhx6:chr2:36081953-36082436:-	Lhx6:1	36081983	36082283	264264	2	36081983	36082583	127	NA	NA	NA	NA	NA	NA	NA	NA	287291	NA	NA	NA	FALSE	TRUE	NA	NA	NA	NA	NA	NA	NA	NA	FALSE	NA	NA	TRUE	NA	TRUE
138828698	Lhx9	chr1	-	138825186	138847719	1.38829e+08	53.1836	0.0673124	138828509	138828828	319	Lhx9:chr1:138828509-138828828:-	Lhx9:2	138828398	138828698	68	1	138828398	138828998	128	NA	NA	NA	49	NA	NA	NA	NA	NA	230	288	NA	FALSE	TRUE	NA	NA	NA	FALSE	NA	NA	NA	NA	NA	FALSE	FALSE	TRUE	NA	TRUE
138830271	Lhx9	chr1	-	138825186	138847719	1.3883e+08	56.3935	1	138830108	138830446	338	Lhx9:chr1:138830108-138830446:-	Lhx9:4	138829971	138830271		NA	138829971	138830571	NA	NA	NA	NA	NA	NA	NA	NA	NA	141174	NA	NA	NA	FALSE	NA	NA	NA	NA	NA	NA	NA	NA	NA	TRUE	NA	NA	TRUE	NA	TRUE
138830884	Lhx9	chr1	-	138825186	138847719	1.38831e+08	91.805	0.737587	138830658	138831208	550	Lhx9:chr1:138830658-138831208:-	Lhx9:5	138830584	138830884		NA	138830584	138831184	50	NA	NA	NA	25	NA	NA	NA	NA	NA	265	29151156161	NA	FALSE	FALSE	NA	NA	NA	FALSE	NA	NA	NA	NA	NA	FALSE	TRUE	TRUE	NA	TRUE
138830954	Lhx9	chr1	-	138825186	138847719	1.38831e+08	52.9778	0.262413	138830947	138831264	317	Lhx9:chr1:138830947-138831264:-	Lhx9:5	138830654	138830954	10	1	138830654	138831254	31120	NA	NA	NA	4,19,95	NA	NA	NA	42	NA	23	99221226231	NA	FALSE	TRUE	NA	NA	NA	TRUE	NA	NA	NA	FALSE	NA	FALSE	TRUE	TRUE	NA	TRUE
84531161	Lin52	chr12	+	84451422	84533509	8.45309e+07	25.2553	0.00485269	84530821	84530973	152	Lin52:chr12:84530821-84530973:+	Lin52:10	84531161	84531461		NA	84530861	84531461	NA	NA	NA	NA	NA	NA	138	NA	NA	NA	NA	NA	NA	FALSE	NA	NA	NA	NA	NA	NA	TRUE	NA	NA	NA	NA	NA	TRUE	NA	TRUE
107412074	Lin7a	chr10	+	107271686	107425143	1.07412e+08	64.5655	1	107411872	107412259	387	Lin7a:chr10:107411872-107412259:+	Lin7a:2	107412074	107412374	97	1	107411774	107412374	NA	NA	NA	167	NA	185236	NA	NA	NA	NA	212	79	NA	FALSE	NA	NA	NA	TRUE	NA	FALSE	NA	NA	NA	NA	FALSE	FALSE	TRUE	NA	TRUE
107421216	Lin7a	chr10	+	107271686	107425143	1.07421e+08	81.777	0.397404	107420982	107421472	490	Lin7a:chr10:107420982-107421472:+	Lin7a:4	107421216	107421516	84258	2	107420916	107421516	183	NA	NA	NA	NA	NA	NA	171	NA	56	NA	266273277281	260261262	FALSE	FALSE	NA	NA	NA	NA	NA	NA	TRUE	NA	FALSE	NA	FALSE	TRUE	FALSE	TRUE
109899775	Lin7c	chr2	+	109890853	109901003	1.099e+08	48.7705	0.34821	109899742	109900035	293	Lin7c:chr2:109899742-109900035:+	Lin7c:5	109899775	109900075	248292	2	109899475	109900075	NA	NA	NA	NA	NA	NA	NA	NA	NA	267	NA	165	NA	FALSE	NA	NA	NA	NA	NA	NA	NA	NA	NA	FALSE	NA	TRUE	TRUE	NA	TRUE
180690437	Lin9	chr1	+	180641150	180690694	1.8069e+08	95.6921	0.468758	180690136	180690694	558	Lin9:chr1:180690136-180690694:+	Lin9:15	180690437	180690694	73,98,248	3	180690137	180690737	97	NA	NA	22194	NA	NA	NA	NA	NA	53228	186	NA	NA	FALSE	TRUE	NA	NA	FALSE	NA	NA	NA	NA	NA	FALSE	FALSE	NA	TRUE	NA	TRUE
35708014	Lingo2	chr4	-	35696815	35845204	3.5708e+07	40.4075	0.472839	35707881	35708123	242	Lingo2:chr4:35707881-35708123:-	Lingo2:2	35707714	35708014	248	1	35707714	35708314	NA	NA	NA	NA	187222	NA	171	108	NA	NA	NA	NA	NA	FALSE	NA	NA	NA	NA	FALSE	NA	TRUE	TRUE	NA	NA	NA	NA	TRUE	NA	TRUE
17457817	Lix1	chr17	+	17402672	17459388	17457817	100.31	0.0703403	17457516	17458117	601	Lix1:chr17:17457516-17458117:+	Lix1:11	17457817	17458117		NA	17457517	17458117	123159	NA	NA	NA	NA	137	NA	NA	NA	141	NA	247	NA	FALSE	TRUE	NA	NA	NA	NA	TRUE	NA	NA	NA	TRUE	NA	FALSE	TRUE	NA	TRUE
17458112	Lix1	chr17	+	17402672	17459388	17458112	75.512	0.302752	17457885	17458338	453	Lix1:chr17:17457885-17458338:+	Lix1:11	17458112	17458412	201	1	17457812	17458412	59,75	NA	NA	NA	NA	NA	NA	NA	NA	180	196	NA	NA	FALSE	FALSE	NA	NA	NA	NA	NA	NA	NA	NA	TRUE	FALSE	NA	TRUE	NA	TRUE
120231211	Llph	chr10	+	120227070	120232582	1.20231e+08	77.9152	0.101945	120231122	120231589	467	Llph:chr10:120231122-120231589:+	Llph:3	120231211	120231511		NA	120230911	120231511	NA	NA	NA	NA	NA	NA	NA	NA	NA	NA	84112	NA	NA	FALSE	NA	NA	NA	NA	NA	NA	NA	NA	NA	NA	TRUE	NA	TRUE	NA	TRUE
9200780	Lmbrd2	chr15	+	9140550	9202494	9.20078e+06	43.4524	1	9200645	9200905	260	Lmbrd2:chr15:9200645-9200905:+	Lmbrd2:15	9200780	9201080		NA	9200480	9201080	NA	NA	NA	NA	NA	NA	NA	NA	NA	NA	NA	1.68173e+17	NA	FALSE	NA	NA	NA	NA	NA	NA	NA	NA	NA	NA	NA	TRUE	TRUE	NA	TRUE
25657537	Lmf1	chr17	+	25579085	25668540	2.56576e+07	35.8981	0.605678	25657451	25657667	216	Lmf1:chr17:25657451-25657667:+	Lmf1:2	25657537	25657837		NA	25657237	25657837	NA	NA	NA	NA	NA	NA	NA	NA	NA	NA	1.07111e+29	NA	91,92,93,94,95,96,97,98,99,100	FALSE	NA	NA	NA	NA	NA	NA	NA	NA	NA	NA	TRUE	NA	TRUE	FALSE	TRUE
138365547	Lmo3	chr6	-	138362918	138581968	1.38366e+08	69.401	0.0200196	138365317	138365734	417	Lmo3:chr6:138365317-138365734:-	Lmo3:3	138365247	138365547		NA	138365247	138365847	265	NA	NA	NA	NA	153	NA	NA	NA	NA	NA	157161	NA	FALSE	FALSE	NA	NA	NA	NA	TRUE	NA	NA	NA	NA	NA	TRUE	TRUE	NA	TRUE
74520778	Lnpk	chr2	-	74514805	74578948	7.45209e+07	36.0859	0.011217	74520823	74521039	216	Lnpk:chr2:74520823-74521039:-	Lnpk:3	74520478	74520778		NA	74520478	74521078	NA	NA	NA	NA	NA	NA	NA	129	NA	NA	NA	NA	NA	FALSE	NA	NA	NA	NA	NA	NA	NA	TRUE	NA	NA	NA	NA	TRUE	NA	TRUE
74597266	Lnx1	chr5	-	74592447	74677873	7.45973e+07	75.3453	1	74597034	74597486	452	Lnx1:chr5:74597034-74597486:-	Lnx1:1	74596966	74597266	30,30	2	74596966	74597566	64	NA	NA	NA	NA	NA	NA	NA	71	140222	NA	NA	NA	FALSE	FALSE	NA	NA	NA	NA	NA	NA	NA	FALSE	TRUE	NA	NA	TRUE	NA	TRUE
106933656	Lpar4	chrX	+	106920625	106935496	1.06934e+08	55.6866	0.230681	106933436	106933770	334	Lpar4:chrX:106933436-106933770:+	Lpar4:4	106933656	106933956	97245	2	106933356	106933956	198	NA	NA	NA	209	NA	NA	NA	62,99,213	78218	NA	NA	NA	FALSE	FALSE	NA	NA	NA	FALSE	NA	NA	NA	TRUE	FALSE	NA	NA	TRUE	NA	TRUE
71247117	Lpin2	chr17	+	71183556	71249818	7.12471e+07	62.374	1	71246913	71247287	374	Lpin2:chr17:71246913-71247287:+	Lpin2:13	71247117	71247417	211	1	71246817	71247417	NA	NA	NA	NA	NA	194	NA	NA	NA	NA	146	NA	NA	FALSE	NA	NA	NA	NA	NA	FALSE	NA	NA	NA	NA	TRUE	NA	TRUE	NA	TRUE
86782395	Lrba	chr3	+	86224680	86782703	8.67824e+07	68.4138	0.339036	86782203	86782613	410	Lrba:chr3:86782203-86782613:+	Lrba:14	86782395	86782695	228252292	3	86782095	86782695	NA	NA	NA	268	NA	NA	NA	NA	NA	272	174	NA	NA	FALSE	NA	NA	NA	FALSE	NA	NA	NA	NA	NA	FALSE	TRUE	NA	TRUE	NA	TRUE
147472649	Lrch2	chrX	-	147470375	147554050	1.47473e+08	95.3757	0.283218	147472361	147472934	573	Lrch2:chrX:147472361-147472934:-	Lrch2:2	147472349	147472649		NA	147472349	147472949	NA	110	NA	NA	NA	NA	NA	NA	NA	NA	NA	NA	NA	FALSE	NA	TRUE	NA	NA	NA	NA	NA	NA	NA	NA	NA	NA	TRUE	NA	TRUE
4612055	Lrfn4	chr19	-	4611783	4615667	4.61205e+06	60.1098	0.247251	4611873	4612233	360	Lrfn4:chr19:4611873-4612233:-	Lrfn4:1	4611783	4612055	265206	2	4611755	4612355	NA	NA	NA	NA	NA	NA	162	NA	NA	249	NA	NA	NA	FALSE	NA	NA	NA	NA	NA	NA	TRUE	NA	NA	FALSE	NA	NA	TRUE	NA	TRUE
61844889	Lrfn5	chr12	+	61523948	61857931	6.1845e+07	92.3593	0.825479	61844705	61845259	554	Lrfn5:chr12:61844705-61845259:+	Lrfn5:48	61844889	61845189	257280	2	61844589	61845189	209	59109	NA	NA	NA	NA	NA	147	57107	168241	236	NA	NA	FALSE	FALSE	TRUE	NA	NA	NA	NA	NA	TRUE	TRUE	TRUE	FALSE	NA	TRUE	NA	TRUE
42651956	Lrp1b	chr2	-	40595248	42653624	4.2652e+07	51.8548	1	42651801	42652112	311	Lrp1b:chr2:42651801-42652112:-	Lrp1b:21	42651656	42651956		NA	42651656	42652256	150	289	NA	108	189	NA	NA	278	NA	174	178	182	NA	FALSE	TRUE	FALSE	NA	TRUE	FALSE	NA	NA	FALSE	NA	TRUE	TRUE	FALSE	TRUE	NA	TRUE
134450519	Lrp6	chr6	-	134446476	134566913	1.34451e+08	112.718	0.546223	134450292	134450969	677	Lrp6:chr6:134450292-134450969:-	Lrp6:3	134450219	134450519	203,16	2	134450219	134450819	NA	NA	NA	NA	NA	NA	NA	NA	NA	103	54212	NA	NA	FALSE	NA	NA	NA	NA	NA	NA	NA	NA	NA	TRUE	FALSE	NA	TRUE	NA	TRUE
77431295	Lrrc1	chr9	-	77430819	77544870	7.74313e+07	53.9993	0.105439	77431139	77431463	324	Lrrc1:chr9:77431139-77431463:-	Lrrc1:1	77430995	77431295	284234215	3	77430995	77431595	NA	NA	176	NA	NA	NA	NA	NA	NA	189	NA	279	NA	FALSE	NA	NA	TRUE	NA	NA	NA	NA	NA	NA	FALSE	NA	FALSE	TRUE	NA	TRUE
28828376	Lrrc4	chr6	-	28661831	28831747	2.88284e+07	37.2907	0.0994358	28828319	28828543	224	Lrrc4:chr6:28828319-28828543:-	Lrrc4:7	28828076	28828376	248	1	28828076	28828676	NA	NA	NA	NA	NA	NA	NA	NA	NA	224	NA	175	NA	FALSE	NA	NA	NA	NA	NA	NA	NA	NA	NA	FALSE	NA	TRUE	TRUE	NA	TRUE
101913444	Lrrc51	chr7	-	101912984	101921212	1.01913e+08	29.3196	0.093631	101913378	101913554	176	Lrrc51:chr7:101913378-101913554:-	Lrrc51:1	101913144	101913444	299286270	3	101913144	101913744	NA	NA	NA	NA	NA	NA	NA	147	NA	NA	70	NA	NA	FALSE	NA	NA	NA	NA	NA	NA	NA	TRUE	NA	NA	FALSE	NA	TRUE	NA	TRUE
66380100	Lrrc6	chr15	-	66379858	66500910	6.63803e+07	87.2511	0.222692	66379993	66380516	523	Lrrc6:chr15:66379993-66380516:-	Lrrc6:1	66379858	66380100	241	1	66379800	66380400	96	NA	NA	NA	NA	NA	NA	NA	NA	218	NA	NA	NA	FALSE	TRUE	NA	NA	NA	NA	NA	NA	NA	NA	FALSE	NA	NA	TRUE	NA	TRUE
158067392	Lrrc7	chr3	-	158067186	158562221	1.58067e+08	74.9223	0.629056	158067186	158067597	411	Lrrc7:chr3:158067186-158067597:-	Lrrc7:1	158067186	158067392		NA	158067092	158067692	144	181	NA	166	NA	NA	NA	NA	NA	188	NA	NA	NA	FALSE	TRUE	FALSE	NA	TRUE	NA	NA	NA	NA	NA	FALSE	NA	NA	TRUE	NA	TRUE
158082243	Lrrc7	chr3	-	158067186	158562221	1.58082e+08	60.5701	1	158082039	158082402	363	Lrrc7:chr3:158082039-158082402:-	Lrrc7:4	158081943	158082243		NA	158081943	158082543	49	NA	NA	160237	NA	NA	131	NA	NA	NA	191195201	NA	NA	FALSE	FALSE	NA	NA	TRUE	NA	NA	TRUE	NA	NA	NA	FALSE	NA	TRUE	NA	TRUE
63929475	Lrrtm3	chr10	-	63928471	64090274	6.39294e+07	39.142	0.0594254	63929282	63929517	235	Lrrtm3:chr10:63929282-63929517:-	Lrrtm3:2	63929175	63929475	218,41	2	63929175	63929775	NA	93	193	NA	NA	NA	NA	97226	NA	NA	NA	211	NA	FALSE	NA	TRUE	FALSE	NA	NA	NA	NA	TRUE	NA	NA	NA	FALSE	TRUE	NA	TRUE
80023125	Lrrtm4	chr6	+	80018877	80810143	8.00232e+07	80.01	1	80022913	80023393	480	Lrrtm4:chr6:80022913-80023393:+	Lrrtm4:1	80023125	80023425		NA	80022825	80023425	NA	NA	NA	NA	179	NA	NA	NA	NA	267	235	NA	NA	FALSE	NA	NA	NA	NA	TRUE	NA	NA	NA	NA	FALSE	FALSE	NA	TRUE	NA	TRUE
75392646	Ltbp1	chr17	+	75005568	75393334	7.53927e+07	147.065	1	75392270	75393152	882	Ltbp1:chr17:75392270-75393152:+	Ltbp1:21	75392646	75392946	294	1	75392346	75392946	NA	NA	NA	NA	NA	NA	NA	NA	NA	275	268	120280293	2.78279e+32	FALSE	NA	NA	NA	NA	NA	NA	NA	NA	NA	FALSE	FALSE	TRUE	TRUE	FALSE	TRUE
84781765	Ltbp2	chr12	-	84781385	84876532	8.47818e+07	32.2952	1	84781654	84781848	194	Ltbp2:chr12:84781654-84781848:-	Ltbp2:1	84781465	84781765		NA	84781465	84782065	NA	NA	161	NA	NA	NA	NA	NA	NA	NA	NA	NA	NA	FALSE	NA	NA	TRUE	NA	NA	NA	NA	NA	NA	NA	NA	NA	TRUE	NA	TRUE
144920712	LTO1	chr7	+	144915100	144931368	1.44921e+08	101.157	0.100966	144920472	144921079	607	LTO1:chr7:144920472-144921079:+	LTO1:3	144920712	144921012	44	1	144920412	144921012	NA	NA	NA	NA	NA	NA	NA	NA	NA	156	NA	NA	NA	FALSE	NA	NA	NA	NA	NA	NA	NA	NA	NA	TRUE	NA	NA	TRUE	NA	TRUE
38606136	Luc7l2	chr6	+	38551465	38617682	3.86061e+07	61.814	0.798241	38605950	38606321	371	Luc7l2:chr6:38605950-38606321:+	Luc7l2:16	38606136	38606436	205231	2	38605836	38606436	185212	NA	NA	NA	NA	NA	NA	NA	NA	167173177194198	226	NA	2.14215e+20	FALSE	FALSE	NA	NA	NA	NA	NA	NA	NA	NA	TRUE	FALSE	NA	TRUE	FALSE	TRUE
38606260	Luc7l2	chr6	+	38551465	38617682	3.86063e+07	19.787	0.0587857	38606216	38606334	118	Luc7l2:chr6:38606216-38606334:+	Luc7l2:16	38606260	38606560	81107	2	38605960	38606560	61,88	NA	NA	NA	NA	NA	NA	NA	NA	43,49,53,70,74	102	NA	90,91,92,93,94,95,96	FALSE	FALSE	NA	NA	NA	NA	NA	NA	NA	NA	FALSE	TRUE	NA	TRUE	FALSE	TRUE
38608884	Luc7l2	chr6	+	38551465	38617682	3.86089e+07	23.3676	0.0156855	38608830	38608971	141	Luc7l2:chr6:38608830-38608971:+	Luc7l2:18	38608884	38609184	42,55,213,236	4	38608584	38609184	205	NA	NA	NA	NA	NA	NA	229	NA	NA	93	NA	NA	FALSE	FALSE	NA	NA	NA	NA	NA	NA	FALSE	NA	NA	TRUE	NA	TRUE	NA	TRUE
50193205	Lypd6	chr2	+	50066429	50193569	5.01932e+07	157.334	0.0395201	50192707	50193569	862	Lypd6:chr2:50192707-50193569:+	Lypd6:13	50193205	50193505		NA	50192905	50193505	169	NA	NA	NA	181	NA	NA	NA	NA	NA	NA	NA	NA	FALSE	TRUE	NA	NA	NA	FALSE	NA	NA	NA	NA	NA	NA	NA	TRUE	NA	TRUE
4841079	Lypla1	chr1	+	4807823	4847745	4.84109e+06	57.6332	1	4840915	4841260	345	Lypla1:chr1:4840915-4841260:+	Lypla1:3	4841079	4841379	53207221	3	4840779	4841379	143211	NA	119	NA	204	NA	NA	154	NA	170	NA	NA	NA	FALSE	TRUE	NA	TRUE	NA	FALSE	NA	NA	TRUE	NA	TRUE	NA	NA	TRUE	NA	TRUE
67225106	Lysmd4	chr7	+	67222608	67228468	6.72251e+07	58.0715	1	67224918	67225267	349	Lysmd4:chr7:67224918-67225267:+	Lysmd4:2	67225106	67225406	53205	2	67224806	67225406	70	NA	123	NA	NA	NA	NA	NA	NA	NA	NA	167171179184	NA	FALSE	FALSE	NA	TRUE	NA	NA	NA	NA	NA	NA	NA	NA	TRUE	TRUE	NA	TRUE
123697217	Lztfl1	chr9	-	123694406	123717625	1.23697e+08	75.547	0.34451	123696992	123697445	453	Lztfl1:chr9:123696992-123697445:-	Lztfl1:2	123696917	123697217	233205	2	123696917	123697517	NA	NA	NA	146	NA	NA	NA	NA	NA	151155	174	NA	NA	FALSE	NA	NA	NA	TRUE	NA	NA	NA	NA	NA	TRUE	TRUE	NA	TRUE	NA	TRUE
55784592	Mab21l1	chr3	+	55782510	55785287	5.57847e+07	85.3308	0.686253	55784434	55784946	512	Mab21l1:chr3:55784434-55784946:+	Mab21l1:1	55784592	55784892	226286	2	55784292	55784892	108	NA	NA	NA	NA	274	NA	269	62112	265	NA	38	NA	FALSE	TRUE	NA	NA	NA	NA	FALSE	NA	FALSE	TRUE	FALSE	NA	FALSE	TRUE	NA	TRUE
97638667	Macir	chr1	-	97606318	97662074	9.76386e+07	47.6409	1	97638503	97638789	286	Macir:chr1:97638503-97638789:-	Macir:1	97638367	97638667		NA	97638367	97638967	NA	NA	NA	NA	116	NA	NA	NA	NA	NA	107	NA	103104	FALSE	NA	NA	NA	NA	TRUE	NA	NA	NA	NA	NA	TRUE	NA	TRUE	FALSE	TRUE
142384378	Macrod2	chr2	+	140395309	142392966	1.42384e+08	22.2429	1	142384295	142384429	134	Macrod2:chr2:142384295-142384429:+	Macrod2:20	142384378	142384678	10	1	142384078	142384678	145234	NA	NA	NA	NA	NA	NA	NA	NA	NA	171	NA	NA	FALSE	TRUE	NA	NA	NA	NA	NA	NA	NA	NA	NA	TRUE	NA	TRUE	NA	TRUE
142389867	Macrod2	chr2	+	140395309	142392966	1.4239e+08	38.384	1	142389765	142389996	231	Macrod2:chr2:142389765-142389996:+	Macrod2:21	142389867	142390167		NA	142389567	142390167	NA	NA	NA	NA	NA	NA	NA	214	NA	NA	107165193198208	182187	NA	FALSE	NA	NA	NA	NA	NA	NA	NA	FALSE	NA	NA	TRUE	FALSE	TRUE	NA	TRUE
66539905	Mad2l1	chr6	+	66535390	66547220	6.65399e+07	77.5146	1	66539664	66540129	465	Mad2l1:chr6:66539664-66540129:+	Mad2l1:1	66539905	66540205	45	1	66539605	66540205	283	NA	163	NA	NA	NA	NA	273	NA	NA	141	NA	NA	FALSE	FALSE	NA	TRUE	NA	NA	NA	NA	FALSE	NA	NA	TRUE	NA	TRUE	NA	TRUE
93681184	Magi1	chr6	-	93673263	94283322	9.36812e+07	73.402	0.0726813	93680930	93681370	440	Magi1:chr6:93680930-93681370:-	Magi1:6	93680884	93681184		NA	93680884	93681484	NA	NA	NA	NA	NA	NA	NA	197	NA	169	100	7,29,34,39,193	NA	FALSE	NA	NA	NA	NA	NA	NA	NA	FALSE	NA	TRUE	TRUE	FALSE	TRUE	NA	TRUE
93681349	Magi1	chr6	-	93673263	94283322	9.36814e+07	57.2675	0.130064	93681180	93681523	343	Magi1:chr6:93681180-93681523:-	Magi1:6	93681049	93681349		NA	93681049	93681649	NA	NA	NA	NA	NA	NA	NA	NA	NA	NA	265	172194199204	NA	FALSE	NA	NA	NA	NA	NA	NA	NA	NA	NA	NA	FALSE	TRUE	TRUE	NA	TRUE
104015491	Magi3	chr3	-	104013091	104220374	1.04015e+08	190.642	0.329176	104014872	104016016	1144	Magi3:chr3:104014872-104016016:-	Magi3:2	104015191	104015491	224	1	104015191	104015791	NA	NA	NA	NA	NA	161	NA	NA	NA	NA	NA	NA	NA	FALSE	NA	NA	NA	NA	NA	TRUE	NA	NA	NA	NA	NA	NA	TRUE	NA	TRUE
105968872	Magt1	chrX	-	105968084	106011899	1.05969e+08	69.0785	0.0931237	105968677	105969091	414	Magt1:chrX:105968677-105969091:-	Magt1:2	105968572	105968872		NA	105968572	105969172	NA	NA	NA	124	NA	NA	NA	NA	NA	NA	159	149	NA	FALSE	NA	NA	NA	TRUE	NA	NA	NA	NA	NA	NA	TRUE	TRUE	TRUE	NA	TRUE
105969287	Magt1	chrX	-	105968084	106011899	1.05969e+08	68.8646	0.425284	105969088	105969502	414	Magt1:chrX:105969088-105969502:-	Magt1:2	105968987	105969287		NA	105968987	105969587	NA	NA	NA	NA	NA	NA	NA	NA	NA	NA	6.13414e+57	NA	NA	FALSE	NA	NA	NA	NA	NA	NA	NA	NA	NA	NA	TRUE	NA	TRUE	NA	TRUE
121309875	Map1a	chr2	+	121289600	121310832	1.2131e+08	64.7139	0.0662987	121309674	121310062	388	Map1a:chr2:121309674-121310062:+	Map1a:3	121309875	121310175	268	1	121309575	121310175	NA	129	NA	90168	NA	95	NA	NA	127	247	110	114118	NA	FALSE	NA	TRUE	NA	TRUE	NA	TRUE	NA	NA	TRUE	FALSE	TRUE	TRUE	TRUE	NA	TRUE
66442279	Map2	chr1	+	66175316	66442583	6.64423e+07	110.309	0.183838	66441958	66442583	625	Map2:chr1:66441958-66442583:+	Map2:13	66442279	66442579	44,75,86	3	66441979	66442579	NA	NA	NA	NA	NA	NA	NA	NA	NA	284	NA	95	NA	FALSE	NA	NA	NA	NA	NA	NA	NA	NA	NA	FALSE	NA	TRUE	TRUE	NA	TRUE
65689584	Map2k4	chr11	-	65688240	65788297	6.56896e+07	73.1942	0.167453	65689378	65689817	439	Map2k4:chr11:65689378-65689817:-	Map2k4:2	65689284	65689584		NA	65689284	65689884	NA	NA	153	NA	NA	NA	NA	NA	NA	NA	NA	NA	NA	FALSE	NA	NA	TRUE	NA	NA	NA	NA	NA	NA	NA	NA	NA	TRUE	NA	TRUE
32020524	Map3k7	chr4	+	31964097	32023477	3.20205e+07	157.335	0.23628	32020068	32021012	944	Map3k7:chr4:32020068-32021012:+	Map3k7:6	32020524	32020824	0,102,201,238,283,294,0,102,201,238,283,294	12	32020224	32020824	NA	NA	NA	NA	93270	NA	NA	NA	NA	259278	NA	NA	NA	FALSE	NA	NA	NA	NA	TRUE	NA	NA	NA	NA	FALSE	NA	NA	TRUE	NA	TRUE
32023181	Map3k7	chr4	+	31964097	32023477	3.20232e+07	78.3062	0.169112	32022956	32023425	469	Map3k7:chr4:32022956-32023425:+	Map3k7:8	32023181	32023477	251283251283	4	32022881	32023481	NA	NA	NA	NA	NA	NA	NA	115	NA	266	NA	NA	NA	FALSE	NA	NA	NA	NA	NA	NA	NA	TRUE	NA	FALSE	NA	NA	TRUE	NA	TRUE
99317646	Map6	chr7	+	99267447	99337137	99317646	79.2488	0.46464	99317408	99317883	475	Map6:chr7:99317408-99317883:+	Map6:5	99317646	99317946		NA	99317346	99317946	70	NA	NA	NA	NA	23	NA	NA	NA	1	NA	86,90	NA	FALSE	FALSE	NA	NA	NA	NA	FALSE	NA	NA	NA	FALSE	NA	TRUE	TRUE	NA	TRUE
99336834	Map6	chr7	+	99267447	99337137	9.93368e+07	110.945	0.227732	99336514	99337137	623	Map6:chr7:99336514-99337137:+	Map6:9	99336834	99337134	269269	2	99336534	99337134	NA	NA	NA	NA	NA	NA	NA	NA	147	281	NA	28	NA	FALSE	NA	NA	NA	NA	NA	NA	NA	NA	TRUE	FALSE	NA	FALSE	TRUE	NA	TRUE
47321062	Mapk1ip1l	chr14	+	47308550	47323566	4.73208e+07	17.901	0.00893636	47320730	47320837	107	Mapk1ip1l:chr14:47320730-47320837:+	Mapk1ip1l:4	47321062	47321362		NA	47320762	47321362	NA	NA	NA	NA	158	NA	NA	NA	224	NA	NA	NA	NA	FALSE	NA	NA	NA	NA	TRUE	NA	NA	NA	FALSE	NA	NA	NA	TRUE	NA	TRUE
47321134	Mapk1ip1l	chr14	+	47308550	47323566	4.73212e+07	105.963	0.517272	47320832	47321467	635	Mapk1ip1l:chr14:47320832-47321467:+	Mapk1ip1l:4	47321134	47321434		NA	47320834	47321434	NA	NA	NA	NA	86	NA	NA	NA	152	277282	265	NA	NA	FALSE	NA	NA	NA	NA	FALSE	NA	NA	NA	TRUE	FALSE	FALSE	NA	TRUE	NA	TRUE
47321191	Mapk1ip1l	chr14	+	47308550	47323566	4.73212e+07	46.3947	0.354859	47321097	47321376	279	Mapk1ip1l:chr14:47321097-47321376:+	Mapk1ip1l:4	47321191	47321491		NA	47320891	47321491	NA	NA	NA	NA	29	NA	NA	NA	95	220225	208	NA	NA	FALSE	NA	NA	NA	NA	FALSE	NA	NA	NA	TRUE	FALSE	FALSE	NA	TRUE	NA	TRUE
47321247	Mapk1ip1l	chr14	+	47308550	47323566	4.73215e+07	51.4539	0.118932	47321299	47321607	308	Mapk1ip1l:chr14:47321299-47321607:+	Mapk1ip1l:4	47321247	47321547		NA	47320947	47321547	NA	NA	NA	NA	NA	NA	NA	NA	39	164169	152	254	NA	FALSE	NA	NA	NA	NA	NA	NA	NA	NA	FALSE	TRUE	TRUE	FALSE	TRUE	NA	TRUE
73928766	Mapk4	chr18	-	73928475	74064929	7.39287e+07	103.589	0.292418	73928475	73929042	567	Mapk4:chr18:73928475-73929042:-	Mapk4:1	73928475	73928766	280,209,17,280,209,17	6	73928466	73929066	NA	NA	NA	276	234	148	NA	NA	NA	258	NA	NA	NA	FALSE	NA	NA	NA	FALSE	FALSE	TRUE	NA	NA	NA	FALSE	NA	NA	TRUE	NA	TRUE
33381617	Mapk8	chr14	-	33377173	33447158	3.33816e+07	77.5659	0.178521	33381386	33381851	465	Mapk8:chr14:33381386-33381851:-	Mapk8:4	33381317	33381617		NA	33381317	33381917	101	NA	NA	NA	NA	NA	NA	NA	NA	NA	153	NA	NA	FALSE	TRUE	NA	NA	NA	NA	NA	NA	NA	NA	NA	TRUE	NA	TRUE	NA	TRUE
131048977	Mapkapk2	chr1	-	131047305	131097826	1.31049e+08	54.8352	1	131048822	131049151	329	Mapkapk2:chr1:131048822-131049151:-	Mapkapk2:2	131048677	131048977		NA	131048677	131049277	NA	278	NA	NA	NA	NA	NA	NA	NA	NA	NA	1.51157e+26	NA	FALSE	NA	FALSE	NA	NA	NA	NA	NA	NA	NA	NA	NA	TRUE	TRUE	NA	TRUE
33695739	Marchf2	chr17	-	33685692	33718670	3.36957e+07	53.8433	1	33695575	33695898	323	Marchf2:chr17:33695575-33695898:-	Marchf2:2	33695439	33695739		NA	33695439	33696039	NA	146	NA	NA	151	218	NA	NA	NA	156160	175179183187	NA	NA	FALSE	NA	TRUE	NA	NA	TRUE	FALSE	NA	NA	NA	TRUE	TRUE	NA	TRUE	NA	TRUE
34429148	Matn2	chr15	+	34306680	34436273	3.44291e+07	49.5912	1	34428988	34429285	297	Matn2:chr15:34428988-34429285:+	Matn2:2	34429148	34429448		NA	34428848	34429448	18247	NA	NA	NA	NA	NA	219	139	NA	NA	NA	NA	NA	FALSE	FALSE	NA	NA	NA	NA	NA	FALSE	TRUE	NA	NA	NA	NA	TRUE	NA	TRUE
34431135	Matn2	chr15	+	34306680	34436273	3.44311e+07	45.0083	1	34430995	34431265	270	Matn2:chr15:34430995-34431265:+	Matn2:3	34431135	34431435		NA	34430835	34431435	112	214	NA	NA	NA	NA	NA	NA	NA	100104196	NA	38	NA	FALSE	TRUE	FALSE	NA	NA	NA	NA	NA	NA	NA	TRUE	NA	FALSE	TRUE	NA	TRUE
70010711	Mau2	chr8	-	70010400	70042700	7.00107e+07	70.0667	0.121286	70010517	70010937	420	Mau2:chr8:70010517-70010937:-	Mau2:1	70010411	70010711	290	1	70010411	70011011	294	NA	NA	NA	NA	NA	NA	NA	NA	261	172	NA	NA	FALSE	FALSE	NA	NA	NA	NA	NA	NA	NA	NA	FALSE	TRUE	NA	TRUE	NA	TRUE
49264156	Mbd5	chr2	+	48949508	49321017	4.92643e+07	111.53	0.328506	49263952	49264621	669	Mbd5:chr2:49263952-49264621:+	Mbd5:35	49264156	49264456		NA	49263856	49264456	NA	NA	132	NA	NA	NA	NA	NA	NA	NA	67,97	NA	NA	FALSE	NA	NA	TRUE	NA	NA	NA	NA	NA	NA	NA	TRUE	NA	TRUE	NA	TRUE
66857833	Mc4r	chr18	-	66857704	66860506	6.68578e+07	74.654	1	66857704	66858063	359	Mc4r:chr18:66857704-66858063:-	Mc4r:1	66857704	66857833		NA	66857533	66858133	NA	NA	119	NA	NA	NA	NA	NA	NA	110	NA	NA	NA	FALSE	NA	NA	TRUE	NA	NA	NA	NA	NA	NA	TRUE	NA	NA	TRUE	NA	TRUE
66858759	Mc4r	chr18	-	66857704	66860506	6.6859e+07	87.2712	0.463387	66858690	66859213	523	Mc4r:chr18:66858690-66859213:-	Mc4r:2	66858459	66858759	240,205,101,10	4	66858459	66859059	159	NA	NA	NA	78181	277	NA	NA	NA	223	NA	NA	NA	FALSE	TRUE	NA	NA	NA	FALSE	FALSE	NA	NA	NA	FALSE	NA	NA	TRUE	NA	TRUE
35958303	Mccc1	chr3	-	35955484	36000678	3.59583e+07	51.814	1	35958157	35958468	311	Mccc1:chr3:35958157-35958468:-	Mccc1:2	35958003	35958303	202	1	35958003	35958603	10	NA	4	NA	NA	NA	NA	NA	NA	179	145151	15	NA	FALSE	FALSE	NA	FALSE	NA	NA	NA	NA	NA	NA	TRUE	TRUE	FALSE	TRUE	NA	TRUE
18632543	Mcph1	chr8	+	18595131	18804382	18632543	59.4272	0.474167	18632364	18632721	357	Mcph1:chr8:18632364-18632721:+	Mcph1:5	18632543	18632843		NA	18632243	18632843	164	NA	NA	NA	NA	NA	NA	NA	NA	NA	66	NA	NA	FALSE	TRUE	NA	NA	NA	NA	NA	NA	NA	NA	NA	FALSE	NA	TRUE	NA	TRUE
77030546	Mctp1	chr13	+	76384535	77033291	7.70306e+07	59.9277	1	77030377	77030737	360	Mctp1:chr13:77030377-77030737:+	Mctp1:23	77030546	77030846	218	1	77030246	77030846	NA	137	NA	NA	115265	NA	NA	NA	NA	119	201	270276281285289	NA	FALSE	NA	TRUE	NA	NA	TRUE	NA	NA	NA	NA	TRUE	FALSE	FALSE	TRUE	NA	TRUE
66471522	Mdga2	chr12	-	66456202	67222549	6.64714e+07	119.858	0.474552	66471029	66471748	719	Mdga2:chr12:66471029-66471748:-	Mdga2:2	66471222	66471522	53,7	2	66471222	66471822	NA	27	NA	NA	129167	NA	NA	NA	190	136	55	87	NA	FALSE	NA	FALSE	NA	NA	TRUE	NA	NA	NA	FALSE	TRUE	FALSE	FALSE	TRUE	NA	TRUE
118763984	Med13l	chr5	+	118560719	118765438	1.18764e+08	45.8976	0.108616	118763844	118764120	276	Med13l:chr5:118763844-118764120:+	Med13l:17	118763984	118764284	40283	2	118763684	118764284	237	NA	NA	NA	NA	NA	NA	NA	NA	NA	169	165	NA	FALSE	FALSE	NA	NA	NA	NA	NA	NA	NA	NA	NA	TRUE	TRUE	TRUE	NA	TRUE
81570428	Med6	chr12	-	81569750	81595006	8.15704e+07	38.3332	1	81570315	81570545	230	Med6:chr12:81570315-81570545:-	Med6:1	81570128	81570428		NA	81570128	81570728	NA	218	NA	NA	95	NA	NA	NA	NA	NA	NA	NA	53,54,55,56,57,58,59,60	FALSE	NA	FALSE	NA	NA	TRUE	NA	NA	NA	NA	NA	NA	NA	TRUE	FALSE	TRUE
70432129	Megf9	chr4	-	70427065	70534928	7.04321e+07	46.367	0.268263	70431986	70432264	278	Megf9:chr4:70431986-70432264:-	Megf9:4	70431829	70432129	292207	2	70431829	70432429	180	NA	NA	234	185	NA	NA	NA	NA	268	191	NA	NA	FALSE	TRUE	NA	NA	FALSE	FALSE	NA	NA	NA	NA	FALSE	FALSE	NA	TRUE	NA	TRUE
70432591	Megf9	chr4	-	70427065	70534928	7.04327e+07	158.962	0.132666	70432250	70433204	954	Megf9:chr4:70432250-70433204:-	Megf9:4	70432291	70432591	28,10	2	70432291	70432891	NA	NA	NA	NA	NA	NA	NA	NA	NA	NA	6167	NA	NA	FALSE	NA	NA	NA	NA	NA	NA	NA	NA	NA	NA	TRUE	NA	TRUE	NA	TRUE
70432798	Megf9	chr4	-	70427065	70534928	7.04328e+07	49.804	0.0558525	70432650	70432949	299	Megf9:chr4:70432650-70432949:-	Megf9:4	70432498	70432798	235217	2	70432498	70433098	NA	107	NA	NA	NA	NA	NA	NA	NA	183	213	NA	NA	FALSE	NA	TRUE	NA	NA	NA	NA	NA	NA	NA	FALSE	FALSE	NA	TRUE	NA	TRUE
127045116	Mettl1	chr10	+	127041932	127047526	127045116	41.6611	0.254724	127044991	127045240	249	Mettl1:chr10:127044991-127045240:+	Mettl1:2	127045116	127045416	11233	2	127044816	127045416	122	NA	NA	NA	NA	NA	NA	NA	NA	NA	212	NA	NA	FALSE	TRUE	NA	NA	NA	NA	NA	NA	NA	NA	NA	FALSE	NA	TRUE	NA	TRUE
109092738	Mettl15	chr2	-	109092297	109278290	1.09093e+08	95.5454	0.0707164	109092455	109093028	573	Mettl15:chr2:109092455-109093028:-	Mettl15:1	109092438	109092738	84	1	109092438	109093038	120138	NA	NA	NA	NA	NA	NA	NA	143	65	NA	NA	NA	FALSE	TRUE	NA	NA	NA	NA	NA	NA	NA	TRUE	FALSE	NA	NA	TRUE	NA	TRUE
94724391	Mettl4	chr17	-	94722589	94749892	9.47244e+07	112.388	0.182884	94724111	94724785	674	Mettl4:chr17:94724111-94724785:-	Mettl4:3	94724091	94724391	258	1	94724091	94724691	NA	NA	NA	NA	NA	NA	NA	NA	24	NA	134195	NA	268269270	FALSE	NA	NA	NA	NA	NA	NA	NA	NA	FALSE	NA	TRUE	NA	TRUE	FALSE	TRUE
31479447	Mettl6	chr14	-	31473556	31495040	3.14795e+07	83.8113	0.118348	31479199	31479702	503	Mettl6:chr14:31479199-31479702:-	Mettl6:3	31479147	31479447		NA	31479147	31479747	NA	NA	NA	NA	NA	NA	NA	NA	NA	NA	166	NA	NA	FALSE	NA	NA	NA	NA	NA	NA	NA	NA	NA	NA	TRUE	NA	TRUE	NA	TRUE
100305282	Mettl7a1	chr15	+	100304228	100330481	100305282	52.443	0.771704	100305124	100305439	315	Mettl7a1:chr15:100305124-100305439:+	Mettl7a1:1	100305282	100305582	62	1	100304982	100305582	NA	NA	NA	NA	NA	NA	NA	NA	NA	NA	NA	1.45149e+20	NA	FALSE	NA	NA	NA	NA	NA	NA	NA	NA	NA	NA	NA	TRUE	TRUE	NA	TRUE
121494039	Mfap1a	chr2	-	121491911	121506665	1.21494e+08	69.1827	0.180293	121493975	121494390	415	Mfap1a:chr2:121493975-121494390:-	Mfap1a:2	121493739	121494039	280	1	121493739	121494339	NA	NA	NA	NA	NA	NA	41	106	NA	263	21	NA	NA	FALSE	NA	NA	NA	NA	NA	NA	FALSE	TRUE	NA	FALSE	FALSE	NA	TRUE	NA	TRUE
121494250	Mfap1a	chr2	-	121491911	121506665	1.21494e+08	33.9671	0.0998576	121494173	121494377	204	Mfap1a:chr2:121494173-121494377:-	Mfap1a:2	121493950	121494250		NA	121493950	121494550	NA	25	NA	NA	NA	NA	80252	NA	29	NA	232	109	NA	FALSE	NA	FALSE	NA	NA	NA	NA	FALSE	NA	FALSE	NA	FALSE	TRUE	TRUE	NA	TRUE
121461797	Mfap1b	chr2	-	121458323	121474067	1.21462e+08	53.6834	0.0569634	121461642	121461964	322	Mfap1b:chr2:121461642-121461964:-	Mfap1b:1	121461497	121461797		NA	121461497	121462097	NA	115	NA	NA	NA	NA	170	NA	119	NA	NA	199	NA	FALSE	NA	TRUE	NA	NA	NA	NA	TRUE	NA	TRUE	NA	NA	FALSE	TRUE	NA	TRUE
132026689	Mfsd4a	chr1	-	132022806	132067965	1.32027e+08	59.0895	0.476039	132026532	132026887	355	Mfsd4a:chr1:132026532-132026887:-	Mfsd4a:2	132026389	132026689	68	1	132026389	132026989	273	NA	NA	NA	NA	291	NA	NA	NA	NA	83,91	NA	69,70,71,72,73,74,75,76,77,78,79,80,86,87	FALSE	FALSE	NA	NA	NA	NA	FALSE	NA	NA	NA	NA	TRUE	NA	TRUE	FALSE	TRUE
102282401	Mfsd5	chr15	+	102279454	102284874	1.02282e+08	34.4463	1	102282297	102282504	207	Mfsd5:chr15:102282297-102282504:+	Mfsd5:2	102282401	102282701		NA	102282101	102282701	NA	NA	NA	NA	NA	NA	NA	NA	NA	NA	NA	9.71021e+16	NA	FALSE	NA	NA	NA	NA	NA	NA	NA	NA	NA	NA	NA	TRUE	TRUE	NA	TRUE
40819214	Mfsd8	chr3	-	40818063	40846885	4.08192e+07	28.161	0.0672648	40819093	40819262	169	Mfsd8:chr3:40819093-40819262:-	Mfsd8:2	40818914	40819214	97,61,26	3	40818914	40819514	35	NA	NA	NA	NA	148	4	70	NA	8,41,75	NA	NA	NA	FALSE	FALSE	NA	NA	NA	NA	TRUE	FALSE	FALSE	NA	FALSE	NA	NA	TRUE	NA	TRUE
40819403	Mfsd8	chr3	-	40818063	40846885	4.08195e+07	113.165	0.262829	40819114	40819793	679	Mfsd8:chr3:40819114-40819793:-	Mfsd8:2	40819103	40819403	286250215	3	40819103	40819703	169188224	103	NA	NA	NA	NA	193	176259	NA	197230264	NA	NA	NA	FALSE	TRUE	TRUE	NA	NA	NA	NA	FALSE	TRUE	NA	FALSE	NA	NA	TRUE	NA	TRUE
80253004	Mief1	chr15	+	80234018	80254124	8.02529e+07	42.1688	0.0168916	80252731	80252984	253	Mief1:chr15:80252731-80252984:+	Mief1:6	80253004	80253304		NA	80252704	80253304	126	NA	NA	NA	NA	NA	NA	NA	NA	NA	NA	NA	NA	FALSE	TRUE	NA	NA	NA	NA	NA	NA	NA	NA	NA	NA	NA	TRUE	NA	TRUE
152274120	Miga1	chr3	-	152273460	152340407	1.52274e+08	156.053	0.20652	152273528	152274465	937	Miga1:chr3:152273528-152274465:-	Miga1:1	152273820	152274120	275229	2	152273820	152274420	166207	NA	NA	NA	190	NA	NA	NA	NA	255	NA	NA	NA	FALSE	TRUE	NA	NA	NA	FALSE	NA	NA	NA	NA	FALSE	NA	NA	TRUE	NA	TRUE
152281877	Miga1	chr3	-	152273460	152340407	1.52282e+08	52.3473	0.575298	152281730	152282044	314	Miga1:chr3:152281730-152282044:-	Miga1:3	152281577	152281877	300	1	152281577	152282177	35	NA	NA	NA	NA	NA	NA	NA	NA	239257	145252294	NA	NA	FALSE	FALSE	NA	NA	NA	NA	NA	NA	NA	NA	FALSE	TRUE	NA	TRUE	NA	TRUE
152332607	Miga1	chr3	-	152273460	152340407	1.52333e+08	54.6293	1	152332436	152332763	327	Miga1:chr3:152332436-152332763:-	Miga1:9	152332307	152332607		NA	152332307	152332907	199	NA	149	139	NA	NA	NA	169	NA	155	190	NA	NA	FALSE	FALSE	NA	TRUE	TRUE	NA	NA	NA	TRUE	NA	TRUE	FALSE	NA	TRUE	NA	TRUE
70603396	Mindy2	chr9	-	70599014	70657174	7.06034e+07	34.8824	0.421009	70603290	70603499	209	Mindy2:chr9:70603290-70603499:-	Mindy2:2	70603096	70603396	28	1	70603096	70603696	NA	22,93	NA	NA	NA	NA	NA	NA	NA	5	162	170	NA	FALSE	NA	TRUE	NA	NA	NA	NA	NA	NA	NA	FALSE	TRUE	TRUE	TRUE	NA	TRUE
8243746	Mios	chr6	+	8209222	8245505	8.24375e+06	37.9377	0.807267	8243639	8243866	227	Mios:chr6:8243639-8243866:+	Mios:7	8243746	8244046	109	1	8243446	8244046	96247	166175258	NA	NA	NA	NA	109	NA	87	79,83	NA	NA	NA	FALSE	TRUE	TRUE	NA	NA	NA	NA	TRUE	NA	FALSE	FALSE	NA	NA	TRUE	NA	TRUE
8243812	Mios	chr6	+	8209222	8245505	8.24381e+06	11.4895	0.192733	8243779	8243848	69	Mios:chr6:8243779-8243848:+	Mios:7	8243812	8244112	43	1	8243512	8244112	30181	100109192	NA	NA	NA	NA	43	NA	21	13,17,292	NA	NA	NA	FALSE	FALSE	TRUE	NA	NA	NA	NA	FALSE	NA	FALSE	FALSE	NA	NA	TRUE	NA	TRUE
65154759	Mis18bp1	chr12	-	65132734	65172598	6.51548e+07	42.2569	1	65154648	65154901	253	Mis18bp1:chr12:65154648-65154901:-	Mis18bp1:5	65154459	65154759	41	1	65154459	65155059	NA	NA	NA	110	NA	NA	NA	NA	NA	95	NA	228	NA	FALSE	NA	NA	NA	TRUE	NA	NA	NA	NA	NA	TRUE	NA	FALSE	TRUE	NA	TRUE
111309704	Mlkl	chr8	-	111306874	111338177	1.1131e+08	28.6256	0.0393934	111309599	111309771	172	Mlkl:chr8:111309599-111309771:-	Mlkl:1	111309404	111309704	36,14	2	111309404	111310004	NA	NA	NA	NA	NA	NA	43	NA	NA	29	56,60,64,68,72,76,80,84,90,94,100,106	NA	45,46,47,48,49	FALSE	NA	NA	NA	NA	NA	NA	FALSE	NA	NA	FALSE	TRUE	NA	TRUE	FALSE	TRUE
116701982	Mmachc	chr4	-	116699544	116708406	1.16702e+08	38.0909	0.100794	116701875	116702104	229	Mmachc:chr4:116701875-116702104:-	Mmachc:1	116701682	116701982	84	1	116701682	116702282	NA	NA	NA	NA	98	289	85	NA	NA	53,78,90	114118122	NA	1.00101e+23	FALSE	NA	NA	NA	NA	TRUE	FALSE	FALSE	NA	NA	TRUE	TRUE	NA	TRUE	FALSE	TRUE
56585859	Mmgt1	chrX	-	56585503	56598069	5.65858e+07	110.406	0.109695	56585503	56586125	622	Mmgt1:chrX:56585503-56586125:-	Mmgt1:1	56585559	56585859	297	1	56585559	56586159	NA	NA	NA	NA	NA	NA	NA	NA	293	106277	NA	NA	NA	FALSE	NA	NA	NA	NA	NA	NA	NA	NA	FALSE	TRUE	NA	NA	TRUE	NA	TRUE
18116486	Mmp16	chr4	+	17853458	18125405	1.81165e+07	68.3222	1	18116268	18116678	410	Mmp16:chr4:18116268-18116678:+	Mmp16:32	18116486	18116786	240	1	18116186	18116786	67216	NA	NA	NA	NA	6	NA	NA	38	NA	45118150207	156226	NA	FALSE	FALSE	NA	NA	NA	NA	FALSE	NA	NA	FALSE	NA	TRUE	TRUE	TRUE	NA	TRUE
18118579	Mmp16	chr4	+	17853458	18125405	1.81185e+07	76.8791	0.337992	18118313	18118775	462	Mmp16:chr4:18118313-18118775:+	Mmp16:34	18118579	18118879		NA	18118279	18118879	NA	NA	NA	NA	NA	NA	NA	NA	NA	NA	157163	NA	NA	FALSE	NA	NA	NA	NA	NA	NA	NA	NA	NA	NA	TRUE	NA	TRUE	NA	TRUE
88756823	Mob1b	chr5	+	88720855	88764220	8.87563e+07	61.3709	0.0326922	88756091	88756460	369	Mob1b:chr5:88756091-88756460:+	Mob1b:7	88756823	88757123	7,53,103	3	88756523	88757123	106	NA	NA	38	NA	NA	NA	NA	84	NA	NA	NA	NA	FALSE	TRUE	NA	NA	FALSE	NA	NA	NA	NA	FALSE	NA	NA	NA	TRUE	NA	TRUE
88763088	Mob1b	chr5	+	88720855	88764220	8.87631e+07	67.7341	0.444236	88762889	88763295	406	Mob1b:chr5:88762889-88763295:+	Mob1b:9	88763088	88763388		NA	88762788	88763388	NA	NA	NA	NA	185	NA	NA	169	55	NA	237249	214	NA	FALSE	NA	NA	NA	NA	FALSE	NA	NA	TRUE	FALSE	NA	FALSE	FALSE	TRUE	NA	TRUE
115835907	Mob3c	chr4	+	115828092	115836195	1.15836e+08	24.9315	0.0181699	115835665	115835814	149	Mob3c:chr4:115835665-115835814:+	Mob3c:2	115835907	115836195	210249275288	4	115835607	115836207	NA	NA	NA	NA	NA	NA	270	NA	156	256	10229	NA	NA	FALSE	NA	NA	NA	NA	NA	NA	FALSE	NA	TRUE	FALSE	FALSE	NA	TRUE	NA	TRUE
114824684	Mocs2	chr13	+	114818259	114833162	1.14825e+08	43.9665	1	114824508	114824772	264	Mocs2:chr13:114824508-114824772:+	Mocs2:2	114824684	114824984	10,10,10,10	4	114824384	114824984	NA	NA	197245	NA	171	NA	NA	NA	250	NA	NA	269	NA	FALSE	NA	NA	FALSE	NA	TRUE	NA	NA	NA	FALSE	NA	NA	FALSE	TRUE	NA	TRUE
114826166	Mocs2	chr13	+	114818259	114833162	1.14826e+08	16.299	1	114826125	114826223	98	Mocs2:chr13:114826125-114826223:+	Mocs2:4	114826166	114826466	82,109,82,109,82,109,82,109	8	114825866	114826466	86	NA	168	NA	NA	NA	NA	NA	286291	NA	NA	NA	NA	FALSE	FALSE	NA	TRUE	NA	NA	NA	NA	NA	FALSE	NA	NA	NA	TRUE	NA	TRUE
168232238	Mocs3	chr2	+	168230622	168232594	1.68232e+08	31.0975	0.169392	168232129	168232316	187	Mocs3:chr2:168232129-168232316:+	Mocs3:1	168232238	168232538	13,57,85	3	168231938	168232538	106	NA	NA	NA	37,48	NA	NA	NA	NA	NA	NA	NA	NA	FALSE	TRUE	NA	NA	NA	FALSE	NA	NA	NA	NA	NA	NA	NA	TRUE	NA	TRUE
136733114	Morf4l2	chrX	-	136732942	136741661	1.36733e+08	60.4208	1	136732942	136733302	360	Morf4l2:chrX:136732942-136733302:-	Morf4l2:1	136732942	136733114		NA	136732814	136733414	NA	NA	NA	NA	NA	NA	NA	NA	NA	135	NA	NA	NA	FALSE	NA	NA	NA	NA	NA	NA	NA	NA	NA	TRUE	NA	NA	TRUE	NA	TRUE
124252970	Mphosph9	chr5	-	124250959	124327972	1.24253e+08	141.643	0.347988	124252493	124253343	850	Mphosph9:chr5:124252493-124253343:-	Mphosph9:2	124252670	124252970	300	1	124252670	124253270	NA	103	NA	NA	282	NA	NA	NA	NA	NA	73107	293	285286287288289	FALSE	NA	TRUE	NA	NA	FALSE	NA	NA	NA	NA	NA	TRUE	FALSE	TRUE	FALSE	TRUE
124253507	Mphosph9	chr5	-	124250959	124327972	1.24254e+08	64.2115	0.197693	124253332	124253718	386	Mphosph9:chr5:124253332-124253718:-	Mphosph9:2	124253207	124253507		NA	124253207	124253807	147	NA	NA	NA	NA	164	NA	NA	NA	NA	NA	NA	NA	FALSE	TRUE	NA	NA	NA	NA	TRUE	NA	NA	NA	NA	NA	NA	TRUE	NA	TRUE
4781557	Mrpl15	chr1	-	4773200	4785739	4.78156e+06	65.1566	1	4781367	4781758	391	Mrpl15:chr1:4781367-4781758:-	Mrpl15:5	4781257	4781557		NA	4781257	4781857	NA	NA	NA	NA	NA	NA	128	NA	287	140146	NA	135157	NA	FALSE	NA	NA	NA	NA	NA	NA	TRUE	NA	FALSE	TRUE	NA	TRUE	TRUE	NA	TRUE
84715486	Mrpl39	chr16	-	84713340	84735742	8.47155e+07	35.5972	1	84715388	84715602	214	Mrpl39:chr16:84715388-84715602:-	Mrpl39:1	84715186	84715486	67	1	84715186	84715786	72	97	NA	31,57	102180	NA	NA	NA	35106	61	NA	NA	74,75,76,77,78,79,80	FALSE	FALSE	TRUE	NA	FALSE	TRUE	NA	NA	NA	TRUE	FALSE	NA	NA	TRUE	FALSE	TRUE
24988267	Mrs2	chr13	-	24987483	25020379	2.49882e+07	68.7076	0.199005	24987989	24988402	413	Mrs2:chr13:24987989-24988402:-	Mrs2:1	24987967	24988267	292	1	24987967	24988567	NA	NA	NA	220	81	NA	NA	NA	85224	201266	94	NA	NA	FALSE	NA	NA	NA	FALSE	FALSE	NA	NA	NA	FALSE	FALSE	TRUE	NA	TRUE	NA	TRUE
35028783	Msh5	chr17	-	35028605	35046622	3.50288e+07	57.0459	1	35028605	35028941	336	Msh5:chr17:35028605-35028941:-	Msh5:1	35028605	35028783	100	1	35028483	35029083	NA	NA	NA	NA	NA	NA	NA	NA	NA	158	NA	NA	NA	FALSE	NA	NA	NA	NA	NA	NA	NA	NA	NA	TRUE	NA	NA	TRUE	NA	TRUE
88341827	Msi2	chr11	-	88339382	88718229	8.83418e+07	44.0891	0.132616	88341683	88341948	265	Msi2:chr11:88341683-88341948:-	Msi2:2	88341527	88341827		NA	88341527	88342127	99	NA	NA	NA	122	NA	NA	NA	NA	NA	173	NA	NA	FALSE	TRUE	NA	NA	NA	TRUE	NA	NA	NA	NA	NA	TRUE	NA	TRUE	NA	TRUE
88342547	Msi2	chr11	-	88339382	88718229	8.83426e+07	37.7185	0.029986	88342438	88342665	227	Msi2:chr11:88342438-88342665:-	Msi2:2	88342247	88342547	98	1	88342247	88342847	NA	NA	NA	199	NA	NA	NA	NA	NA	NA	40155229	207239	NA	FALSE	NA	NA	NA	FALSE	NA	NA	NA	NA	NA	NA	TRUE	FALSE	TRUE	NA	TRUE
88347066	Msi2	chr11	-	88339382	88718229	8.83471e+07	23.087	1	88347010	88347149	139	Msi2:chr11:88347010-88347149:-	Msi2:4	88346766	88347066	13	1	88346766	88347366	NA	NA	NA	NA	NA	NA	NA	NA	NA	162	NA	NA	NA	FALSE	NA	NA	NA	NA	NA	NA	NA	NA	NA	TRUE	NA	NA	TRUE	NA	TRUE
37820708	Msx1	chr5	-	37820485	37824583	3.78208e+07	96.3429	0.473445	37820529	37821107	578	Msx1:chr5:37820529-37821107:-	Msx1:1	37820485	37820708	220	1	37820408	37821008	NA	NA	NA	NA	NA	38	NA	NA	140	195	216	NA	40,41,42,43,44,45,46,47,48,49	FALSE	NA	NA	NA	NA	NA	FALSE	NA	NA	TRUE	FALSE	FALSE	NA	TRUE	FALSE	TRUE
3783	mt-Nd1	chrM	+	2751	3911	3783	45.6497	0.000674986	3646	3911	265	mt-Nd1:chrM:3646-3911:+	mt-Nd1:1	3783	3911		NA	3483	4083	112	NA	NA	NA	NA	NA	NA	NA	NA	NA	NA	NA	NA	FALSE	TRUE	NA	NA	NA	NA	NA	NA	NA	NA	NA	NA	NA	TRUE	NA	TRUE
11374	mt-Nd4l	chrM	+	9877	11739	11364	64.3844	1	11170	11557	387	mt-Nd4l:chrM:11170-11557:+	mt-Nd4l:1	11374	11674		NA	11074	11674	278	NA	NA	NA	NA	NA	NA	NA	14175	220	240	NA	NA	FALSE	FALSE	NA	NA	NA	NA	NA	NA	NA	TRUE	FALSE	FALSE	NA	TRUE	NA	TRUE
11957	mt-Nd6	chrM	-	11743	14070	11957	47.5025	0.0521435	11814	12099	285	mt-Nd6:chrM:11814-12099:-	mt-Nd6:1	11743	11957		NA	11657	12257	NA	NA	NA	NA	NA	NA	NA	82178	NA	NA	NA	NA	NA	FALSE	NA	NA	NA	NA	NA	NA	NA	TRUE	NA	NA	NA	NA	TRUE	NA	TRUE
12267	mt-Nd6	chrM	-	11743	14070	12267	130.856	0.00907077	11874	12659	785	mt-Nd6:chrM:11874-12659:-	mt-Nd6:1	11967	12267		NA	11967	12567	NA	NA	NA	NA	NA	NA	NA	101173	NA	NA	NA	NA	NA	FALSE	NA	NA	NA	NA	NA	NA	NA	TRUE	NA	NA	NA	NA	TRUE	NA	TRUE
12427	mt-Nd6	chrM	-	11743	14070	12427	151.34	0.0456285	11972	12881	909	mt-Nd6:chrM:11972-12881:-	mt-Nd6:1	12127	12427		NA	12127	12727	NA	NA	NA	NA	NA	NA	NA	138261	79	NA	NA	NA	NA	FALSE	NA	NA	NA	NA	NA	NA	NA	TRUE	FALSE	NA	NA	NA	TRUE	NA	TRUE
13123	mt-Nd6	chrM	-	11743	14070	13123	57.4165	0.049057	12950	13295	345	mt-Nd6:chrM:12950-13295:-	mt-Nd6:1	12823	13123		NA	12823	13423	NA	NA	NA	NA	NA	98	NA	NA	NA	NA	NA	NA	NA	FALSE	NA	NA	NA	NA	NA	TRUE	NA	NA	NA	NA	NA	NA	TRUE	NA	TRUE
13299	mt-Nd6	chrM	-	11743	14070	13299	65.5241	0.0520432	13102	13495	393	mt-Nd6:chrM:13102-13495:-	mt-Nd6:1	12999	13299		NA	12999	13599	99	NA	NA	NA	NA	274	NA	NA	NA	NA	NA	NA	NA	FALSE	TRUE	NA	NA	NA	NA	FALSE	NA	NA	NA	NA	NA	NA	TRUE	NA	TRUE
13641	mt-Nd6	chrM	-	11743	14070	13641	192.332	1.52337e-12	13064	14070	1006	mt-Nd6:chrM:13064-14070:-	mt-Nd6:1	13341	13641	89	1	13341	13941	NA	134	NA	NA	NA	NA	NA	NA	NA	NA	NA	NA	NA	FALSE	NA	TRUE	NA	NA	NA	NA	NA	NA	NA	NA	NA	NA	TRUE	NA	TRUE
83814683	Mta3	chr17	+	83706163	83818083	8.38147e+07	15.3325	0.140638	83814615	83814707	92	Mta3:chr17:83814615-83814707:+	Mta3:13	83814683	83814983	225	1	83814383	83814983	192	173181	NA	NA	NA	NA	NA	163211	179	153201	NA	NA	NA	FALSE	FALSE	TRUE	NA	NA	NA	NA	NA	TRUE	TRUE	TRUE	NA	NA	TRUE	NA	TRUE
124849174	Mtf1	chr4	+	124802549	124849800	1.24849e+08	45.8295	0.242958	124849096	124849371	275	Mtf1:chr4:124849096-124849371:+	Mtf1:8	124849174	124849474	202213	2	124848874	124849474	112201	93	NA	NA	167189	NA	NA	177	NA	28	4	NA	NA	FALSE	TRUE	TRUE	NA	NA	TRUE	NA	NA	TRUE	NA	FALSE	FALSE	NA	TRUE	NA	TRUE
108107239	Mtf2	chr5	+	108065742	108112193	108107239	148.627	0.103524	108106793	108107684	891	Mtf2:chr5:108106793-108107684:+	Mtf2:18	108107239	108107539	3202219266279	5	108106939	108107539	NA	NA	NA	170	NA	NA	NA	NA	245295	NA	NA	128	NA	FALSE	NA	NA	NA	TRUE	NA	NA	NA	NA	FALSE	NA	NA	TRUE	TRUE	NA	TRUE
108111736	Mtf2	chr5	+	108065742	108112193	1.08112e+08	154.607	0.452209	108111304	108112193	889	Mtf2:chr5:108111304-108112193:+	Mtf2:21	108111736	108112036		NA	108111436	108112036	NA	NA	NA	NA	NA	NA	NA	NA	143	NA	NA	NA	2.81282e+29	FALSE	NA	NA	NA	NA	NA	NA	NA	NA	TRUE	NA	NA	NA	TRUE	FALSE	TRUE
89239983	Mthfs	chr9	+	89211157	89241587	8.924e+07	56.073	0.864764	89239812	89240149	337	Mthfs:chr9:89239812-89240149:+	Mthfs:4	89239983	89240283	240257	2	89239683	89240283	3	213229	NA	NA	183	NA	NA	165	227	219	NA	NA	NA	FALSE	FALSE	FALSE	NA	NA	FALSE	NA	NA	TRUE	FALSE	FALSE	NA	NA	TRUE	NA	TRUE
121097076	Mthfsd	chr8	-	121091628	121108327	1.21097e+08	48.3622	1	121096941	121097231	290	Mthfsd:chr8:121096941-121097231:-	Mthfsd:1	121096776	121097076		NA	121096776	121097376	NA	NA	NA	NA	NA	NA	NA	NA	NA	NA	NA	1.1412e+23	NA	FALSE	NA	NA	NA	NA	NA	NA	NA	NA	NA	NA	NA	TRUE	TRUE	NA	TRUE
127791823	Mtln	chr2	-	127791343	127792488	1.27792e+08	17.595	0.133277	127791755	127791860	105	Mtln:chr2:127791755-127791860:-	Mtln:1	127791523	127791823	107,88,77,46,30	5	127791523	127792123	56	NA	NA	NA	69	NA	NA	NA	NA	7,61	103	NA	NA	FALSE	FALSE	NA	NA	NA	FALSE	NA	NA	NA	NA	FALSE	TRUE	NA	TRUE	NA	TRUE
71418790	Mtmr1	chrX	+	71364760	71419341	7.14188e+07	156.341	0.0751405	71418298	71419236	938	Mtmr1:chrX:71418298-71419236:+	Mtmr1:6	71418790	71419090		NA	71418490	71419090	171	NA	NA	NA	NA	NA	NA	NA	NA	NA	NA	NA	NA	FALSE	TRUE	NA	NA	NA	NA	NA	NA	NA	NA	NA	NA	NA	TRUE	NA	TRUE
12271634	Mtmr12	chr15	+	12205028	12274500	1.22716e+07	80.5625	0.097223	12271403	12271886	483	Mtmr12:chr15:12271403-12271886:+	Mtmr12:6	12271634	12271934		NA	12271334	12271934	90157	NA	NA	NA	136	176	NA	NA	NA	NA	NA	NA	NA	FALSE	TRUE	NA	NA	NA	TRUE	TRUE	NA	NA	NA	NA	NA	NA	TRUE	NA	TRUE
12271698	Mtmr12	chr15	+	12205028	12274500	1.22718e+07	106.516	0.0986624	12271494	12272133	639	Mtmr12:chr15:12271494-12272133:+	Mtmr12:6	12271698	12271998	272289	2	12271398	12271998	26,93,288	NA	NA	NA	72262	112	NA	NA	NA	NA	NA	NA	NA	FALSE	TRUE	NA	NA	NA	FALSE	TRUE	NA	NA	NA	NA	NA	NA	TRUE	NA	TRUE
12272027	Mtmr12	chr15	+	12205028	12274500	1.2272e+07	44.8117	0.0520738	12271904	12272173	269	Mtmr12:chr15:12271904-12272173:+	Mtmr12:6	12272027	12272327	19,89,211	3	12271727	12272327	75	NA	53272	NA	68190	NA	NA	144	NA	NA	NA	NA	NA	FALSE	FALSE	NA	FALSE	NA	FALSE	NA	NA	TRUE	NA	NA	NA	NA	TRUE	NA	TRUE
13806124	Mtmr2	chr9	+	13748410	13808909	1.38062e+07	133.979	0.173408	13805808	13806612	804	Mtmr2:chr9:13805808-13806612:+	Mtmr2:5	13806124	13806424		NA	13805824	13806424	107	NA	NA	NA	NA	203	NA	NA	NA	NA	NA	NA	NA	FALSE	TRUE	NA	NA	NA	NA	FALSE	NA	NA	NA	NA	NA	NA	TRUE	NA	TRUE
54700796	Mturn	chr6	+	54681624	54703855	5.47007e+07	174.337	0.0909446	54700135	54701181	1046	Mturn:chr6:54700135-54701181:+	Mturn:5	54700796	54701096	65206225	3	54700496	54701096	192	NA	NA	NA	NA	NA	NA	NA	47162	NA	NA	NA	NA	FALSE	FALSE	NA	NA	NA	NA	NA	NA	NA	TRUE	NA	NA	NA	TRUE	NA	TRUE
40991289	Mtus1	chr8	-	40990675	41133726	4.09913e+07	42.6613	0.0283954	40991177	40991433	256	Mtus1:chr8:40991177-40991433:-	Mtus1:1	40990989	40991289	277,237,82	3	40990989	40991589	267	NA	NA	NA	214	NA	NA	NA	NA	NA	123	NA	NA	FALSE	FALSE	NA	NA	NA	FALSE	NA	NA	NA	NA	NA	TRUE	NA	TRUE	NA	TRUE
163084443	Mybl2	chr2	+	163054687	163084688	1.63084e+08	61.7042	0.206	163084179	163084549	370	Mybl2:chr2:163084179-163084549:+	Mybl2:3	163084443	163084688	244	1	163084143	163084743	165	NA	NA	NA	NA	NA	NA	NA	NA	226	NA	NA	NA	FALSE	TRUE	NA	NA	NA	NA	NA	NA	NA	NA	FALSE	NA	NA	TRUE	NA	TRUE
125087696	Myef2	chr2	-	125085935	125123626	1.25088e+08	96.9551	0.632626	125087630	125088212	582	Myef2:chr2:125087630-125088212:-	Myef2:1	125087396	125087696	19	1	125087396	125087996	101	NA	NA	NA	61	NA	68	NA	NA	NA	NA	232	NA	FALSE	TRUE	NA	NA	NA	FALSE	NA	FALSE	NA	NA	NA	NA	FALSE	TRUE	NA	TRUE
122106713	Myl2	chr5	+	122100957	122113525	1.22107e+08	41.5603	1	122106598	122106848	250	Myl2:chr5:122106598-122106848:+	Myl2:1	122106713	122107013	66,76	2	122106413	122107013	NA	NA	NA	NA	NA	NA	NA	NA	NA	117	NA	NA	NA	FALSE	NA	NA	NA	NA	NA	NA	NA	NA	NA	TRUE	NA	NA	TRUE	NA	TRUE
128492069	Myl6	chr10	-	128490857	128493875	128492069	28.0272	0.579546	128491984	128492153	169	Myl6:chr10:128491984-128492153:-	Myl6:2	128491769	128492069	204	1	128491769	128492369	NA	NA	NA	25	NA	171	NA	NA	NA	NA	NA	NA	NA	FALSE	NA	NA	NA	FALSE	NA	TRUE	NA	NA	NA	NA	NA	NA	TRUE	NA	TRUE
75218168	Myo5a	chr9	+	75071188	75223688	7.52182e+07	154.898	0.176904	75217730	75218659	929	Myo5a:chr9:75217730-75218659:+	Myo5a:27	75218168	75218468	43264279	3	75217868	75218468	22138	NA	103	NA	NA	NA	NA	NA	NA	296	223	NA	NA	FALSE	TRUE	NA	TRUE	NA	NA	NA	NA	NA	NA	FALSE	FALSE	NA	TRUE	NA	TRUE
59926982	Myo9a	chr9	+	59750896	59928866	5.99269e+07	137.257	0.25499	59926504	59927328	824	Myo9a:chr9:59926504-59927328:+	Myo9a:36	59926982	59927282	216	1	59926682	59927282	NA	56	NA	NA	136	61	NA	NA	NA	182192	NA	NA	77,78,79	FALSE	NA	FALSE	NA	NA	TRUE	FALSE	NA	NA	NA	FALSE	NA	NA	TRUE	FALSE	TRUE
63115409	Mypn	chr10	-	63111539	63203952	6.31154e+07	35.0265	1	63115278	63115488	210	Mypn:chr10:63115278-63115488:-	Mypn:1	63115109	63115409		NA	63115109	63115709	NA	NA	154	NA	NA	NA	NA	NA	NA	NA	96112	80,86	NA	FALSE	NA	NA	TRUE	NA	NA	NA	NA	NA	NA	NA	TRUE	FALSE	TRUE	NA	TRUE
94942822	Mysm1	chr4	-	94942040	94979100	9.49429e+07	74.1433	0.358738	94942658	94943103	445	Mysm1:chr4:94942658-94943103:-	Mysm1:1	94942522	94942822		NA	94942522	94943122	76	NA	NA	NA	NA	NA	NA	NA	NA	82	278	87,92,96,100,104,123	2.76277e+32	FALSE	FALSE	NA	NA	NA	NA	NA	NA	NA	NA	FALSE	FALSE	TRUE	TRUE	FALSE	TRUE
94942881	Mysm1	chr4	-	94942040	94979100	9.49431e+07	42.9676	0.0134048	94942981	94943238	257	Mysm1:chr4:94942981-94943238:-	Mysm1:1	94942581	94942881	0	1	94942581	94943181	135	NA	NA	NA	NA	NA	NA	NA	NA	141	NA	1.46151e+17	NA	FALSE	TRUE	NA	NA	NA	NA	NA	NA	NA	NA	TRUE	NA	TRUE	TRUE	NA	TRUE
29856992	Myt1l	chr12	+	29528384	29923213	2.9857e+07	92.5788	0.800699	29856732	29857287	555	Myt1l:chr12:29856732-29857287:+	Myt1l:45	29856992	29857292		NA	29856692	29857292	149	NA	NA	NA	NA	158	129	219	NA	211215223227	NA	NA	NA	FALSE	TRUE	NA	NA	NA	NA	TRUE	TRUE	FALSE	NA	FALSE	NA	NA	TRUE	NA	TRUE
29857050	Myt1l	chr12	+	29528384	29923213	2.98571e+07	31.4007	0.199301	29856981	29857169	188	Myt1l:chr12:29856981-29857169:+	Myt1l:45	29857050	29857350		NA	29856750	29857350	91	NA	NA	NA	NA	100	71	161	NA	153157165169	NA	NA	NA	FALSE	TRUE	NA	NA	NA	NA	TRUE	FALSE	TRUE	NA	TRUE	NA	NA	TRUE	NA	TRUE
150636073	N4bp2l2	chr5	-	150635972	150665612	1.50636e+08	54.7918	0.613968	150635972	150636283	311	N4bp2l2:chr5:150635972-150636283:-	N4bp2l2:1	150635972	150636073	100,51	2	150635773	150636373	NA	NA	NA	NA	NA	NA	NA	91	NA	83	NA	NA	NA	FALSE	NA	NA	NA	NA	NA	NA	NA	TRUE	NA	FALSE	NA	NA	TRUE	NA	TRUE
145915872	Naa20	chr2	+	145903241	145916474	1.45916e+08	168.046	0.0661537	145915370	145916378	1008	Naa20:chr2:145915370-145916378:+	Naa20:2	145915872	145916172	15	1	145915572	145916172	NA	148	NA	NA	NA	210	NA	NA	NA	NA	278	NA	NA	FALSE	NA	TRUE	NA	NA	NA	FALSE	NA	NA	NA	NA	FALSE	NA	TRUE	NA	TRUE
121439847	Naa25	chr5	+	121397936	121444804	121439847	59.7386	0.048059	121439667	121440026	359	Naa25:chr5:121439667-121440026:+	Naa25:9	121439847	121440147	218240278	3	121439547	121440147	NA	287	NA	117	255273	NA	92	NA	259	NA	87	268	NA	FALSE	NA	FALSE	NA	TRUE	FALSE	NA	TRUE	NA	FALSE	NA	FALSE	FALSE	TRUE	NA	TRUE
49188186	Naa30	chr14	+	49172598	49193036	4.91882e+07	106.45	0.445358	49187844	49188482	638	Naa30:chr14:49187844-49188482:+	Naa30:1	49188186	49188486	77205	2	49187886	49188486	167	NA	NA	NA	51	38	NA	NA	NA	186	NA	NA	NA	FALSE	TRUE	NA	NA	NA	FALSE	FALSE	NA	NA	NA	FALSE	NA	NA	TRUE	NA	TRUE
44159484	Naa50	chr16	+	44139853	44163556	4.41596e+07	49.0832	0.201741	44159403	44159697	294	Naa50:chr16:44159403-44159697:+	Naa50:5	44159484	44159784	225	1	44159184	44159784	NA	NA	NA	NA	NA	NA	NA	168	NA	198	203	157	NA	FALSE	NA	NA	NA	NA	NA	NA	NA	TRUE	NA	FALSE	FALSE	TRUE	TRUE	NA	TRUE
44163070	Naa50	chr16	+	44139853	44163556	4.41631e+07	101.697	0.429125	44162829	44163439	610	Naa50:chr16:44162829-44163439:+	Naa50:8	44163070	44163370	253295	2	44162770	44163370	NA	NA	NA	NA	277	NA	NA	153	NA	NA	NA	102	NA	FALSE	NA	NA	NA	NA	FALSE	NA	NA	TRUE	NA	NA	NA	TRUE	TRUE	NA	TRUE
83802492	Nagk	chr6	+	83794982	83803420	8.38025e+07	41.6195	0.371668	83802345	83802594	249	Nagk:chr6:83802345-83802594:+	Nagk:5	83802492	83802792	25,63,63	3	83802192	83802792	17140	NA	NA	NA	NA	NA	NA	NA	NA	40	35	NA	NA	FALSE	TRUE	NA	NA	NA	NA	NA	NA	NA	NA	FALSE	FALSE	NA	TRUE	NA	TRUE
111495365	Nap1l1	chr10	+	111473223	111502026	111495365	19.3737	0.152442	111495306	111495423	117	Nap1l1:chr10:111495306-111495423:+	Nap1l1:6	111495365	111495665	243	1	111495065	111495665	110	NA	NA	NA	118226	283	NA	NA	NA	NA	NA	NA	NA	FALSE	TRUE	NA	NA	NA	TRUE	FALSE	NA	NA	NA	NA	NA	NA	TRUE	NA	TRUE
148695950	Napb	chr2	-	148692915	148732467	1.48696e+08	89.9939	0.0981757	148695702	148696242	540	Napb:chr2:148695702-148696242:-	Napb:2	148695650	148695950		NA	148695650	148696250	176	NA	97	NA	NA	NA	NA	115194	NA	161	182	NA	NA	FALSE	TRUE	NA	TRUE	NA	NA	NA	NA	TRUE	NA	TRUE	FALSE	NA	TRUE	NA	TRUE
103719977	Nat10	chr2	-	103719829	103761270	1.0372e+08	59.5437	1	103719829	103720162	333	Nat10:chr2:103719829-103720162:-	Nat10:1	103719829	103719977		NA	103719677	103720277	NA	NA	NA	NA	NA	NA	NA	NA	NA	130	NA	NA	NA	FALSE	NA	NA	NA	NA	NA	NA	NA	NA	NA	TRUE	NA	NA	TRUE	NA	TRUE
153725833	Nbdy	chrX	+	153723593	153741920	1.53726e+08	24.3297	1	153725743	153725889	146	Nbdy:chrX:153725743-153725889:+	Nbdy:1	153725833	153726133	8,8	2	153725533	153726133	23	NA	114	NA	NA	NA	155	140	NA	27	NA	NA	NA	FALSE	FALSE	NA	TRUE	NA	NA	NA	TRUE	TRUE	NA	FALSE	NA	NA	TRUE	NA	TRUE
153728929	Nbdy	chrX	+	153723593	153741920	1.53729e+08	24.6629	1	153728838	153728986	148	Nbdy:chrX:153728838-153728986:+	Nbdy:2	153728929	153729229	10	1	153728629	153729229	NA	172184216	NA	NA	NA	236	NA	NA	199	NA	NA	NA	NA	FALSE	NA	TRUE	NA	NA	NA	FALSE	NA	NA	FALSE	NA	NA	NA	TRUE	NA	TRUE
55625763	Nbea	chr3	-	55625188	56183701	5.56258e+07	89.6824	0.0941843	55625492	55626030	538	Nbea:chr3:55625492-55626030:-	Nbea:1	55625463	55625763		NA	55625463	55626063	NA	NA	156	NA	NA	NA	NA	NA	NA	NA	NA	NA	NA	FALSE	NA	NA	TRUE	NA	NA	NA	NA	NA	NA	NA	NA	NA	TRUE	NA	TRUE
116463248	Ncapg2	chr12	+	116405402	116463688	1.16463e+08	84.2385	0.208513	116462959	116463464	505	Ncapg2:chr12:116462959-116463464:+	Ncapg2:9	116463248	116463548	221282	2	116462948	116463548	97	169179	194	NA	NA	NA	NA	NA	200	260	74	NA	NA	FALSE	TRUE	TRUE	FALSE	NA	NA	NA	NA	NA	FALSE	FALSE	FALSE	NA	TRUE	NA	TRUE
116463461	Ncapg2	chr12	+	116405402	116463688	1.16463e+08	26.4045	0.134574	116463398	116463557	159	Ncapg2:chr12:116463398-116463557:+	Ncapg2:9	116463461	116463688	8,69,98	3	116463161	116463761	92	NA	NA	NA	NA	NA	NA	NA	NA	47206	NA	NA	NA	FALSE	TRUE	NA	NA	NA	NA	NA	NA	NA	NA	FALSE	NA	NA	TRUE	NA	TRUE
31957415	Ncbp2	chr16	+	31948513	31961781	31957415	183.966	0.131472	31956863	31957966	1103	Ncbp2:chr16:31956863-31957966:+	Ncbp2:2	31957415	31957715	203	1	31957115	31957715	177	NA	NA	NA	NA	NA	NA	267	NA	NA	NA	187192198	NA	FALSE	TRUE	NA	NA	NA	NA	NA	NA	FALSE	NA	NA	NA	FALSE	TRUE	NA	TRUE
27241700	Nceh1	chr3	+	27182965	27284613	2.72417e+07	62.2012	1	27241512	27241885	373	Nceh1:chr3:27241512-27241885:+	Nceh1:2	27241700	27242000		NA	27241400	27242000	NA	NA	NA	NA	NA	NA	NA	NA	NA	NA	NA	1.74179e+17	NA	FALSE	NA	NA	NA	NA	NA	NA	NA	NA	NA	NA	NA	TRUE	TRUE	NA	TRUE
38460612	Ndfip1	chr18	+	38410396	38466386	3.84606e+07	34.6736	1	38460499	38460707	208	Ndfip1:chr18:38460499-38460707:+	Ndfip1:2	38460612	38460912	38,38	2	38460312	38460912	NA	NA	NA	130	33149	NA	NA	NA	NA	NA	NA	NA	NA	FALSE	NA	NA	NA	TRUE	TRUE	NA	NA	NA	NA	NA	NA	NA	TRUE	NA	TRUE
123526803	Ndst3	chr3	-	123526166	123619501	1.23527e+08	81.1894	0.380932	123526576	123527063	487	Ndst3:chr3:123526576-123527063:-	Ndst3:1	123526503	123526803		NA	123526503	123527103	NA	NA	81	NA	NA	NA	NA	156	NA	130	NA	NA	NA	FALSE	NA	NA	FALSE	NA	NA	NA	NA	TRUE	NA	TRUE	NA	NA	TRUE	NA	TRUE
122091610	Ndufab1	chr7	-	122085403	122101886	1.22092e+08	32.4499	1	122091530	122091725	195	Ndufab1:chr7:122091530-122091725:-	Ndufab1:2	122091310	122091610	24,24	2	122091310	122091910	NA	NA	NA	39,98	NA	84	NA	NA	NA	13	NA	NA	NA	FALSE	NA	NA	NA	TRUE	NA	FALSE	NA	NA	NA	FALSE	NA	NA	TRUE	NA	TRUE
78946461	Ndufaf7	chr17	+	78937136	78951663	7.89464e+07	46.8813	0.065483	78946277	78946558	281	Ndufaf7:chr17:78946277-78946558:+	Ndufaf7:3	78946461	78946761		NA	78946161	78946761	57	NA	NA	NA	NA	NA	31	NA	NA	NA	179	NA	NA	FALSE	FALSE	NA	NA	NA	NA	NA	FALSE	NA	NA	NA	TRUE	NA	TRUE	NA	TRUE
78947217	Ndufaf7	chr17	+	78937136	78951663	7.89472e+07	69.7484	0.14469	78946994	78947413	419	Ndufaf7:chr17:78946994-78947413:+	Ndufaf7:3	78947217	78947517	8,284,8,284	4	78946917	78947517	NA	198	NA	NA	NA	267	NA	NA	NA	NA	NA	146150174178	NA	FALSE	NA	FALSE	NA	NA	NA	FALSE	NA	NA	NA	NA	NA	TRUE	TRUE	NA	TRUE
78947429	Ndufaf7	chr17	+	78937136	78951663	7.89474e+07	33.6591	0.070141	78947318	78947520	202	Ndufaf7:chr17:78947318-78947520:+	Ndufaf7:3	78947429	78947729	72,72	2	78947129	78947729	114200	NA	NA	NA	NA	55252	NA	NA	NA	NA	NA	NA	NA	FALSE	TRUE	NA	NA	NA	NA	FALSE	NA	NA	NA	NA	NA	NA	TRUE	NA	TRUE
101968197	Ndufb1	chr12	-	101968083	101976254	1.01968e+08	29.2799	1	101968088	101968263	175	Ndufb1:chr12:101968088-101968263:-	Ndufb1:1	101968083	101968197	99,87,32	3	101967897	101968497	103	54	NA	NA	NA	20	NA	1	NA	72	NA	NA	NA	FALSE	TRUE	FALSE	NA	NA	NA	FALSE	NA	FALSE	NA	FALSE	NA	NA	TRUE	NA	TRUE
14955870	Necab1	chr4	-	14952041	15149131	1.49559e+07	54.2342	1	14955695	14956020	325	Necab1:chr4:14955695-14956020:-	Necab1:3	14955570	14955870	229	1	14955570	14956170	102	207	NA	NA	NA	NA	NA	NA	190	211219	NA	179	NA	FALSE	TRUE	FALSE	NA	NA	NA	NA	NA	NA	FALSE	FALSE	NA	TRUE	TRUE	NA	TRUE
46387996	Nectin3	chr16	-	46387706	46496967	4.6388e+07	88.9785	0.34555	46387706	46388240	534	Nectin3:chr16:46387706-46388240:-	Nectin3:1	46387706	46387996	289256	2	46387696	46388296	168	56	98	NA	NA	130	NA	NA	NA	271	NA	NA	NA	FALSE	TRUE	FALSE	TRUE	NA	NA	TRUE	NA	NA	NA	FALSE	NA	NA	TRUE	NA	TRUE
41311253	Nedd9	chr13	-	41309581	41487293	4.13113e+07	37.697	0.0814358	41311179	41311405	226	Nedd9:chr13:41311179-41311405:-	Nedd9:2	41310953	41311253	279	1	41310953	41311553	NA	NA	NA	NA	NA	NA	NA	NA	141	252	122126	NA	NA	FALSE	NA	NA	NA	NA	NA	NA	NA	NA	TRUE	FALSE	TRUE	NA	TRUE	NA	TRUE
157172384	Negr1	chr3	+	156561794	157316464	1.57172e+08	85.0485	1	157172140	157172650	510	Negr1:chr3:157172140-157172650:+	Negr1:53	157172384	157172684		NA	157172084	157172684	NA	NA	NA	149	NA	NA	NA	NA	NA	NA	93	87	NA	FALSE	NA	NA	NA	TRUE	NA	NA	NA	NA	NA	NA	TRUE	FALSE	TRUE	NA	TRUE
157200053	Negr1	chr3	+	156561794	157316464	1.572e+08	86.128	1	157199762	157200279	517	Negr1:chr3:157199762-157200279:+	Negr1:55	157200053	157200353		NA	157199753	157200353	194	NA	70	NA	NA	133	236	NA	74	240244	159	NA	NA	FALSE	FALSE	NA	FALSE	NA	NA	TRUE	FALSE	NA	FALSE	FALSE	TRUE	NA	TRUE	NA	TRUE
157315394	Negr1	chr3	+	156561794	157316464	1.57315e+08	63.6962	0.726157	157315206	157315589	383	Negr1:chr3:157315206-157315589:+	Negr1:60	157315394	157315694	206224	2	157315094	157315694	163	NA	239	NA	NA	NA	NA	NA	NA	NA	167	NA	NA	FALSE	TRUE	NA	FALSE	NA	NA	NA	NA	NA	NA	NA	TRUE	NA	TRUE	NA	TRUE
157316108	Negr1	chr3	+	156561794	157316464	1.57316e+08	48.5728	0.0868024	157315932	157316224	292	Negr1:chr3:157315932-157316224:+	Negr1:61	157316108	157316408	95272	2	157315808	157316408	106221	NA	NA	NA	NA	253	NA	NA	NA	71	NA	NA	NA	FALSE	TRUE	NA	NA	NA	NA	FALSE	NA	NA	NA	FALSE	NA	NA	TRUE	NA	TRUE
127700814	Nemp1	chr10	+	127677064	127701066	1.27701e+08	67.5429	0.388632	127700626	127701032	406	Nemp1:chr10:127700626-127701032:+	Nemp1:6	127700814	127701066	4234	2	127700514	127701114	247	NA	52	NA	NA	NA	NA	NA	NA	216	154	104	NA	FALSE	FALSE	NA	FALSE	NA	NA	NA	NA	NA	NA	FALSE	TRUE	TRUE	TRUE	NA	TRUE
85639485	Neto2	chr8	-	85636581	85690973	8.56396e+07	85.2148	0.188107	85639321	85639832	511	Neto2:chr8:85639321-85639832:-	Neto2:2	85639185	85639485	239,63,53	3	85639185	85639785	19	28,43,103,213	NA	NA	NA	NA	NA	NA	NA	NA	NA	NA	NA	FALSE	FALSE	TRUE	NA	NA	NA	NA	NA	NA	NA	NA	NA	NA	TRUE	NA	TRUE
26446255	Neurl1b	chr17	+	26414965	26446780	2.64462e+07	62.7133	0.692683	26446002	26446378	376	Neurl1b:chr17:26446002-26446378:+	Neurl1b:1	26446255	26446555	67,77,95	3	26445955	26446555	158176	NA	NA	43	NA	NA	NA	NA	NA	NA	NA	62	NA	FALSE	TRUE	NA	NA	FALSE	NA	NA	NA	NA	NA	NA	NA	FALSE	TRUE	NA	TRUE
55678296	Neurod6	chr6	-	55677819	55681263	5.56781e+07	76.1226	0.212549	55677839	55678295	456	Neurod6:chr6:55677839-55678295:-	Neurod6:1	55677996	55678296	202,100,75,17	4	55677996	55678596	138	67	NA	NA	165	82	NA	NA	NA	NA	NA	NA	NA	FALSE	TRUE	FALSE	NA	NA	TRUE	FALSE	NA	NA	NA	NA	NA	NA	TRUE	NA	TRUE
127635130	Neurog2	chr3	+	127633135	127635631	1.27635e+08	98.2751	0.204643	127634826	127635416	590	Neurog2:chr3:127634826-127635416:+	Neurog2:1	127635130	127635430		NA	127634830	127635430	NA	NA	NA	NA	281	NA	NA	NA	NA	287	175	NA	NA	FALSE	NA	NA	NA	NA	FALSE	NA	NA	NA	NA	FALSE	TRUE	NA	TRUE	NA	TRUE
79580589	Nf1	chr11	+	79339825	79581632	7.95806e+07	73.4611	0.0916244	79580356	79580797	441	Nf1:chr11:79580356-79580797:+	Nf1:35	79580589	79580889		NA	79580289	79580889	NA	NA	NA	NA	NA	NA	NA	NA	NA	NA	161	166	NA	FALSE	NA	NA	NA	NA	NA	NA	NA	NA	NA	NA	TRUE	TRUE	TRUE	NA	TRUE
84705480	Nfix	chr8	-	84704712	84800140	8.47055e+07	81.3881	0.0772643	84705249	84705738	489	Nfix:chr8:84705249-84705738:-	Nfix:1	84705180	84705480		NA	84705180	84705780	NA	NA	NA	NA	NA	NA	NA	NA	NA	164	NA	NA	NA	FALSE	NA	NA	NA	NA	NA	NA	NA	NA	NA	TRUE	NA	NA	TRUE	NA	TRUE
28759191	Nfkbib	chr7	-	28758251	28766640	2.87592e+07	29.4455	1	28759081	28759258	177	Nfkbib:chr7:28759081-28759258:-	Nfkbib:1	28758891	28759191	93	1	28758891	28759491	NA	NA	NA	NA	NA	NA	NA	NA	106	123	NA	NA	NA	FALSE	NA	NA	NA	NA	NA	NA	NA	NA	TRUE	TRUE	NA	NA	TRUE	NA	TRUE
102013575	Nhlh2	chr3	+	102010146	102015492	1.02014e+08	31.6073	0.0205232	102013498	102013688	190	Nhlh2:chr3:102013498-102013688:+	Nhlh2:1	102013575	102013875		NA	102013275	102013875	176225	NA	NA	NA	NA	NA	151	19	NA	43	NA	NA	NA	FALSE	TRUE	NA	NA	NA	NA	NA	TRUE	FALSE	NA	FALSE	NA	NA	TRUE	NA	TRUE
108295515	Nicn1	chr9	+	108290429	108296498	1.08296e+08	41.2121	0.370374	108295411	108295658	247	Nicn1:chr9:108295411-108295658:+	Nicn1:1	108295515	108295815	48,76	2	108295215	108295815	NA	NA	NA	NA	NA	NA	NA	NA	NA	NA	3.91652e+22	NA	NA	FALSE	NA	NA	NA	NA	NA	NA	NA	NA	NA	NA	TRUE	NA	TRUE	NA	TRUE
19811255	Nid2	chr14	+	19751265	19811910	1.98113e+07	158.588	0.103821	19810847	19811798	951	Nid2:chr14:19810847-19811798:+	Nid2:1	19811255	19811555	203249	2	19810955	19811555	129153206	NA	NA	NA	180	NA	253	NA	NA	NA	293	135	NA	FALSE	TRUE	NA	NA	NA	TRUE	NA	FALSE	NA	NA	NA	FALSE	TRUE	TRUE	NA	TRUE
19811450	Nid2	chr14	+	19751265	19811910	1.98115e+07	65.2606	0.323026	19811347	19811739	392	Nid2:chr14:19811347-19811739:+	Nid2:1	19811450	19811750	8,54,256,276,298	5	19811150	19811750	11	NA	NA	NA	NA	104	58	NA	NA	NA	98	NA	NA	FALSE	FALSE	NA	NA	NA	NA	TRUE	FALSE	NA	NA	NA	TRUE	NA	TRUE	NA	TRUE
150934769	Ninl	chr2	-	150934519	151009398	1.50935e+08	22.4011	0.0512242	150934694	150934828	134	Ninl:chr2:150934694-150934828:-	Ninl:1	150934519	150934769	248,61	2	150934469	150935069	118	NA	NA	NA	229	NA	NA	NA	NA	NA	122	61,68,75,82	50,52,53,54,55,56,57,64,71	FALSE	TRUE	NA	NA	NA	FALSE	NA	NA	NA	NA	NA	TRUE	FALSE	TRUE	FALSE	TRUE
55978404	Nipa1	chr7	-	55976063	56019954	5.59786e+07	145.552	0.238515	55978125	55978999	874	Nipa1:chr7:55978125-55978999:-	Nipa1:1	55978104	55978404		NA	55978104	55978704	NA	NA	NA	NA	NA	154	NA	NA	NA	127	111	132137142147	NA	FALSE	NA	NA	NA	NA	NA	TRUE	NA	NA	NA	TRUE	TRUE	TRUE	TRUE	NA	TRUE
37149118	Nkap	chrX	+	37126795	37150746	3.71491e+07	192.754	0.466045	37148565	37149721	1156	Nkap:chrX:37148565-37149721:+	Nkap:10	37149118	37149418	251	1	37148818	37149418	64	NA	NA	NA	NA	227	NA	NA	162	NA	NA	NA	NA	FALSE	FALSE	NA	NA	NA	NA	FALSE	NA	NA	TRUE	NA	NA	NA	TRUE	NA	TRUE
37150377	Nkap	chrX	+	37126795	37150746	3.71503e+07	62.3286	0.0414936	37150069	37150443	374	Nkap:chrX:37150069-37150443:+	Nkap:11	37150377	37150677	245	1	37150077	37150677	NA	NA	NA	134	NA	NA	NA	290	NA	294	NA	NA	NA	FALSE	NA	NA	NA	TRUE	NA	NA	NA	FALSE	NA	FALSE	NA	NA	TRUE	NA	TRUE
50607927	Nkapd1	chr9	-	50605227	50617464	5.06079e+07	54.5866	0.415138	50607741	50608068	327	Nkapd1:chr9:50607741-50608068:-	Nkapd1:2	50607627	50607927	69	1	50607627	50608227	NA	NA	NA	NA	NA	NA	NA	NA	NA	NA	80128236	134	NA	FALSE	NA	NA	NA	NA	NA	NA	NA	NA	NA	NA	TRUE	TRUE	TRUE	NA	TRUE
25423834	Nlgn1	chr3	-	25421799	26332460	2.54238e+07	31.9816	0.0802064	25423707	25423899	192	Nlgn1:chr3:25423707-25423899:-	Nlgn1:2	25423534	25423834		NA	25423534	25424134	55	NA	NA	NA	NA	NA	NA	NA	75209	37205267	91159	41	NA	FALSE	FALSE	NA	NA	NA	NA	NA	NA	NA	FALSE	FALSE	TRUE	FALSE	TRUE	NA	TRUE
25423893	Nlgn1	chr3	-	25421799	26332460	2.54239e+07	51.9614	0.533021	25423738	25424050	312	Nlgn1:chr3:25423738-25424050:-	Nlgn1:2	25423593	25423893		NA	25423593	25424193	114	NA	NA	NA	50,55	NA	23	NA	134268	28,96,264	150218	100	26,27	FALSE	TRUE	NA	NA	NA	FALSE	NA	FALSE	NA	TRUE	TRUE	TRUE	TRUE	TRUE	FALSE	TRUE
25423945	Nlgn1	chr3	-	25421799	26332460	2.5424e+07	47.7337	0.288155	25423881	25424168	287	Nlgn1:chr3:25423881-25424168:-	Nlgn1:2	25423645	25423945		NA	25423645	25424245	41166	NA	NA	NA	102107	NA	75	NA	29186	80148	202270	152	78,79	FALSE	TRUE	NA	NA	NA	TRUE	NA	FALSE	NA	FALSE	TRUE	FALSE	TRUE	TRUE	FALSE	TRUE
25425916	Nlgn1	chr3	-	25421799	26332460	2.54259e+07	54.2961	0.262368	25425742	25426068	326	Nlgn1:chr3:25425742-25426068:-	Nlgn1:3	25425616	25425916		NA	25425616	25426216	NA	NA	125	NA	NA	247	NA	NA	NA	272	NA	1.62167e+17	NA	FALSE	NA	NA	TRUE	NA	NA	FALSE	NA	NA	NA	FALSE	NA	TRUE	TRUE	NA	TRUE
25433437	Nlgn1	chr3	-	25421799	26332460	2.54334e+07	43.1836	0.487921	25433301	25433560	259	Nlgn1:chr3:25433301-25433560:-	Nlgn1:6	25433137	25433437	6	1	25433137	25433737	143	NA	NA	NA	NA	NA	NA	NA	NA	178	NA	149153160166172	NA	FALSE	TRUE	NA	NA	NA	NA	NA	NA	NA	NA	TRUE	NA	TRUE	TRUE	NA	TRUE
101322678	Nlgn3	chrX	+	101299168	101325963	1.01323e+08	102.476	1	101322336	101322951	615	Nlgn3:chrX:101322336-101322951:+	Nlgn3:3	101322678	101322978		NA	101322378	101322978	NA	NA	NA	118	NA	NA	NA	NA	NA	NA	NA	124130	NA	FALSE	NA	NA	NA	TRUE	NA	NA	NA	NA	NA	NA	NA	TRUE	TRUE	NA	TRUE
93960676	Nme1	chr11	-	93956973	93968521	9.39607e+07	15.9715	1	93960636	93960732	96	Nme1:chr11:93960636-93960732:-	Nme1:2	93960376	93960676	9	1	93960376	93960976	138	NA	NA	NA	NA	NA	NA	84	NA	NA	NA	NA	NA	FALSE	TRUE	NA	NA	NA	NA	NA	NA	FALSE	NA	NA	NA	NA	TRUE	NA	TRUE
18651978	Nmrk1	chr19	+	18631950	18654005	1.86521e+07	32.9974	0.635771	18651964	18652162	198	Nmrk1:chr19:18651964-18652162:+	Nmrk1:3	18651978	18652278	214214	2	18651678	18652278	NA	NA	NA	NA	179	NA	NA	168	NA	164172183	NA	NA	NA	FALSE	NA	NA	NA	NA	TRUE	NA	NA	TRUE	NA	TRUE	NA	NA	TRUE	NA	TRUE
153407797	Nol4l	chr2	-	153407456	153529971	1.53408e+08	102.861	0.177362	153407456	153408046	590	Nol4l:chr2:153407456-153408046:-	Nol4l:1	153407497	153407797	256,87	2	153407497	153408097	NA	30	NA	NA	NA	65	122	NA	NA	NA	NA	NA	NA	FALSE	NA	FALSE	NA	NA	NA	FALSE	TRUE	NA	NA	NA	NA	NA	TRUE	NA	TRUE
152058349	Nol9	chr4	+	152039327	152061551	152058349	26.892	0.125159	152058268	152058429	161	Nol9:chr4:152058268-152058429:+	Nol9:6	152058349	152058649		NA	152058049	152058649	37	NA	NA	NA	NA	NA	NA	NA	NA	NA	118	NA	NA	FALSE	FALSE	NA	NA	NA	NA	NA	NA	NA	NA	NA	TRUE	NA	TRUE	NA	TRUE
54070028	Npas3	chr12	+	53248677	54072175	5.40701e+07	129.878	0.194689	54069697	54070476	779	Npas3:chr12:54069697-54070476:+	Npas3:80	54070028	54070328		NA	54069728	54070328	264	NA	NA	NA	NA	109	270	NA	NA	NA	NA	NA	NA	FALSE	FALSE	NA	NA	NA	NA	TRUE	FALSE	NA	NA	NA	NA	NA	TRUE	NA	TRUE
54071565	Npas3	chr12	+	53248677	54072175	5.40716e+07	103.279	0.161174	54071277	54071897	620	Npas3:chr12:54071277-54071897:+	Npas3:81	54071565	54071865		NA	54071265	54071865	90134	50	NA	NA	NA	NA	NA	148	216	NA	NA	NA	NA	FALSE	TRUE	FALSE	NA	NA	NA	NA	NA	TRUE	FALSE	NA	NA	NA	TRUE	NA	TRUE
38248058	Nr1i2	chr16	-	38246076	38294824	3.8248e+07	43.8269	1	38247909	38248172	263	Nr1i2:chr16:38247909-38248172:-	Nr1i2:1	38247758	38248058		NA	38247758	38248358	NA	NA	NA	NA	NA	NA	NA	NA	NA	207	NA	119	NA	FALSE	NA	NA	NA	NA	NA	NA	NA	NA	NA	FALSE	NA	TRUE	TRUE	NA	TRUE
94197005	Nr2c1	chr10	+	94148023	94198553	9.4197e+07	85.7095	0.958085	94196741	94197256	515	Nr2c1:chr10:94196741-94197256:+	Nr2c1:6	94197005	94197305	109212233	3	94196705	94197305	177	NA	NA	NA	188	NA	NA	NA	NA	NA	NA	NA	97,98	FALSE	TRUE	NA	NA	NA	FALSE	NA	NA	NA	NA	NA	NA	NA	TRUE	FALSE	TRUE
92168724	Nr2c2	chr6	+	92091390	92173058	9.21689e+07	109.756	0.503729	92168544	92169203	659	Nr2c2:chr6:92168544-92169203:+	Nr2c2:11	92168724	92169024		NA	92168424	92169024	250	NA	NA	NA	NA	NA	NA	NA	NA	NA	NA	65,92	NA	FALSE	FALSE	NA	NA	NA	NA	NA	NA	NA	NA	NA	NA	TRUE	TRUE	NA	TRUE
103066490	Nras	chr3	+	103058285	103068771	1.03067e+08	130.085	0.208389	103066186	103066966	780	Nras:chr3:103066186-103066966:+	Nras:5	103066490	103066790	296	1	103066190	103066790	NA	97	NA	NA	NA	NA	NA	NA	NA	NA	NA	109	NA	FALSE	NA	TRUE	NA	NA	NA	NA	NA	NA	NA	NA	NA	TRUE	TRUE	NA	TRUE
67267915	Nrbf2	chr10	-	67266682	67285305	6.72679e+07	52.4056	1	67267756	67268071	315	Nrbf2:chr10:67267756-67268071:-	Nrbf2:2	67267615	67267915	74	1	67267615	67268215	NA	NA	83	NA	NA	NA	NA	158	NA	179	174	NA	NA	FALSE	NA	NA	FALSE	NA	NA	NA	NA	TRUE	NA	TRUE	TRUE	NA	TRUE	NA	TRUE
31814248	Nrg1	chr8	-	31809511	32009541	3.18142e+07	42.6772	0.251153	31814099	31814355	256	Nrg1:chr8:31814099-31814355:-	Nrg1:3	31813948	31814248		NA	31813948	31814548	NA	NA	NA	NA	NA	NA	NA	NA	NA	165	106171176182	NA	NA	FALSE	NA	NA	NA	NA	NA	NA	NA	NA	NA	TRUE	TRUE	NA	TRUE	NA	TRUE
31816764	Nrg1	chr8	-	31809511	32009541	3.18169e+07	87.425	0.0387739	31816640	31817165	525	Nrg1:chr8:31816640-31817165:-	Nrg1:4	31816464	31816764	263263	2	31816464	31817064	NA	NA	NA	118	NA	NA	NA	240	NA	NA	272	236	266	FALSE	NA	NA	NA	TRUE	NA	NA	NA	FALSE	NA	NA	FALSE	FALSE	TRUE	FALSE	TRUE
62798741	Nrp2	chr1	+	62703285	62818695	6.27987e+07	56.1129	0.383212	62798565	62798902	337	Nrp2:chr1:62798565-62798902:+	Nrp2:17	62798741	62799041		NA	62798441	62799041	NA	NA	NA	NA	274	NA	NA	NA	NA	238	180184188	193	NA	FALSE	NA	NA	NA	NA	FALSE	NA	NA	NA	NA	FALSE	TRUE	FALSE	TRUE	NA	TRUE
25674478	Nsd3	chr8	+	25602284	25719667	2.56745e+07	98.7256	0.0960231	25674235	25674827	592	Nsd3:chr8:25674235-25674827:+	Nsd3:13	25674478	25674778		NA	25674178	25674778	6228	48	NA	NA	126	250	NA	174	NA	233	130	237	NA	FALSE	FALSE	FALSE	NA	NA	TRUE	FALSE	NA	TRUE	NA	FALSE	TRUE	FALSE	TRUE	NA	TRUE
25674575	Nsd3	chr8	+	25602284	25719667	2.56747e+07	67.7967	0.25231	25674450	25674857	407	Nsd3:chr8:25674450-25674857:+	Nsd3:13	25674575	25674875		NA	25674275	25674875	131	NA	NA	NA	29	153	NA	77	NA	136	33	140	NA	FALSE	TRUE	NA	NA	NA	FALSE	TRUE	NA	FALSE	NA	TRUE	FALSE	TRUE	TRUE	NA	TRUE
6396557	Nsmaf	chr4	-	6396144	6454271	6.39658e+06	89.7674	0.0711889	6396308	6396846	538	Nsmaf:chr4:6396308-6396846:-	Nsmaf:1	6396257	6396557	273,249,203,57	4	6396257	6396857	NA	NA	90	NA	NA	NA	NA	NA	NA	NA	NA	NA	NA	FALSE	NA	NA	TRUE	NA	NA	NA	NA	NA	NA	NA	NA	NA	TRUE	NA	TRUE
77044548	Nsrp1	chr11	-	77044286	77078435	7.70445e+07	99.1239	0.328191	77044286	77044843	557	Nsrp1:chr11:77044286-77044843:-	Nsrp1:1	77044286	77044548	256244	2	77044248	77044848	NA	NA	NA	NA	NA	NA	121137	156	NA	225	NA	NA	NA	FALSE	NA	NA	NA	NA	NA	NA	TRUE	TRUE	NA	FALSE	NA	NA	TRUE	NA	TRUE
28996000	Ntm	chr9	-	28994747	29963129	2.89962e+07	123.02	0.317716	28995805	28996543	738	Ntm:chr9:28995805-28996543:-	Ntm:2	28995700	28996000	279,229,8	3	28995700	28996300	NA	NA	NA	NA	NA	NA	NA	NA	NA	NA	2,87	94,98	NA	FALSE	NA	NA	NA	NA	NA	NA	NA	NA	NA	NA	FALSE	TRUE	TRUE	NA	TRUE
58887639	Ntrk2	chr13	+	58807697	59133970	5.88876e+07	97.5264	0.788764	58887348	58887933	585	Ntrk2:chr13:58887348-58887933:+	Ntrk2:8	58887639	58887939		NA	58887339	58887939	102	NA	NA	NA	NA	NA	NA	NA	NA	NA	1.10114e+89	NA	NA	FALSE	TRUE	NA	NA	NA	NA	NA	NA	NA	NA	NA	TRUE	NA	TRUE	NA	TRUE
58887761	Ntrk2	chr13	+	58807697	59133970	5.88876e+07	34.8751	0.211236	58887538	58887747	209	Ntrk2:chr13:58887538-58887747:+	Ntrk2:8	58887761	58888061		NA	58887461	58888061	NA	NA	NA	NA	NA	NA	NA	NA	NA	NA	4,8,12,16,20,24,28,32,36,40,44,78,83,93,98,103,108,113,118,123,128,133,138,143,148,153	NA	NA	FALSE	NA	NA	NA	NA	NA	NA	NA	NA	NA	NA	TRUE	NA	TRUE	NA	TRUE
78185085	Ntrk3	chr7	-	78175262	78578408	7.81851e+07	156.149	0.171772	78184628	78185565	937	Ntrk3:chr7:78184628-78185565:-	Ntrk3:3	78184785	78185085		NA	78184785	78185385	NA	NA	NA	NA	173	NA	NA	NA	158	NA	NA	223	NA	FALSE	NA	NA	NA	NA	TRUE	NA	NA	NA	TRUE	NA	NA	FALSE	TRUE	NA	TRUE
180544746	Ntsr1	chr2	+	180499976	180544980	1.80545e+08	98.2754	0.139394	180544326	180544916	590	Ntsr1:chr2:180544326-180544916:+	Ntsr1:1	180544746	180544980	233	1	180544446	180545046	NA	NA	NA	NA	NA	NA	NA	NA	NA	176205212	NA	NA	NA	FALSE	NA	NA	NA	NA	NA	NA	NA	NA	NA	TRUE	NA	NA	TRUE	NA	TRUE
116540007	Nucb2	chr7	+	116504369	116545761	1.1654e+08	34.2999	0.607664	116539889	116540095	206	Nucb2:chr7:116539889-116540095:+	Nucb2:4	116540007	116540307	73,89	2	116539707	116540307	NA	64	NA	NA	160	NA	NA	NA	NA	54	164	NA	NA	FALSE	NA	FALSE	NA	NA	TRUE	NA	NA	NA	NA	FALSE	TRUE	NA	TRUE	NA	TRUE
131935917	Nucks1	chr1	+	131910556	131936380	1.31936e+08	117.484	0.186463	131935668	131936373	705	Nucks1:chr1:131935668-131936373:+	Nucks1:11	131935917	131936217	53228258	3	131935617	131936217	NA	NA	NA	117	NA	NA	NA	NA	NA	NA	227	127	NA	FALSE	NA	NA	NA	TRUE	NA	NA	NA	NA	NA	NA	FALSE	TRUE	TRUE	NA	TRUE
6053600	Nudt11	chrX	+	6047453	6055110	6.05359e+06	86.7547	0.112947	6053330	6053851	521	Nudt11:chrX:6053330-6053851:+	Nudt11:1	6053600	6053900		NA	6053300	6053900	169	107155	NA	NA	NA	NA	NA	132	177	162	NA	NA	NA	FALSE	TRUE	TRUE	NA	NA	NA	NA	NA	TRUE	TRUE	TRUE	NA	NA	TRUE	NA	TRUE
20316427	Nudt13	chr14	+	20294722	20319012	2.03162e+07	65.2269	0.0299671	20315957	20316348	391	Nudt13:chr14:20315957-20316348:+	Nudt13:6	20316427	20316727	69,71,95,281	4	20316127	20316727	NA	NA	NA	NA	NA	NA	NA	NA	NA	79	74	178	NA	FALSE	NA	NA	NA	NA	NA	NA	NA	NA	NA	FALSE	FALSE	TRUE	TRUE	NA	TRUE
73519869	Nudt15	chr14	-	73518556	73548242	7.35199e+07	32.3504	0.150885	73519792	73519986	194	Nudt15:chr14:73519792-73519986:-	Nudt15:2	73519569	73519869		NA	73519569	73520169	282	61	147	NA	11	NA	38	NA	NA	294	171	NA	NA	FALSE	FALSE	FALSE	TRUE	NA	FALSE	NA	FALSE	NA	NA	FALSE	TRUE	NA	TRUE	NA	TRUE
46680258	Nup153	chr13	-	46676911	46727940	4.66803e+07	74.3285	0.779628	46680039	46680485	446	Nup153:chr13:46680039-46680485:-	Nup153:1	46679958	46680258		NA	46679958	46680558	NA	NA	125	NA	79	NA	NA	NA	NA	138	NA	NA	NA	FALSE	NA	NA	TRUE	NA	FALSE	NA	NA	NA	NA	TRUE	NA	NA	TRUE	NA	TRUE
46680456	Nup153	chr13	-	46676911	46727940	4.66804e+07	144.996	0.118803	46679916	46680786	870	Nup153:chr13:46679916-46680786:-	Nup153:1	46680156	46680456	16	1	46680156	46680756	118	NA	NA	NA	277	NA	NA	NA	NA	NA	NA	NA	NA	FALSE	TRUE	NA	NA	NA	FALSE	NA	NA	NA	NA	NA	NA	NA	TRUE	NA	TRUE
8156770	Nup155	chr15	+	8109273	8161863	8.15676e+06	30.432	1	8156665	8156848	183	Nup155:chr15:8156665-8156848:+	Nup155:6	8156770	8157070	49266	2	8156470	8157070	9	29	NA	NA	34	150247	NA	NA	NA	NA	NA	NA	NA	FALSE	FALSE	FALSE	NA	NA	FALSE	TRUE	NA	NA	NA	NA	NA	NA	TRUE	NA	TRUE
32053012	Nup214	chr2	+	31974436	32053975	3.2053e+07	74.1383	0.927917	32052799	32053243	444	Nup214:chr2:32052799-32053243:+	Nup214:17	32053012	32053312		NA	32052712	32053312	NA	NA	NA	NA	160	NA	NA	NA	NA	NA	NA	NA	NA	FALSE	NA	NA	NA	NA	TRUE	NA	NA	NA	NA	NA	NA	NA	TRUE	NA	TRUE
181093620	Nvl	chr1	-	181087124	181144204	1.81094e+08	79.4013	0.388379	181093348	181093824	476	Nvl:chr1:181093348-181093824:-	Nvl:4	181093320	181093620	202,71,58	3	181093320	181093920	NA	112	NA	NA	NA	46	NA	NA	NA	177	NA	NA	NA	FALSE	NA	TRUE	NA	NA	NA	FALSE	NA	NA	NA	TRUE	NA	NA	TRUE	NA	TRUE
9248703	Nxph1	chr6	+	8948614	9264104	9.24873e+06	197.041	0.177384	9248136	9249318	1182	Nxph1:chr6:9248136-9249318:+	Nxph1:21	9248703	9249003	94	1	9248403	9249003	NA	NA	NA	296	83175	NA	NA	NA	192	NA	286	NA	NA	FALSE	NA	NA	NA	FALSE	TRUE	NA	NA	NA	FALSE	NA	FALSE	NA	TRUE	NA	TRUE
73322962	Ociad2	chr5	-	73322194	73338948	7.3323e+07	92.9724	0.333585	73322722	73323279	557	Ociad2:chr5:73322722-73323279:-	Ociad2:1	73322662	73322962		NA	73322662	73323262	NA	NA	NA	147	NA	NA	NA	NA	NA	152156165170175	NA	NA	NA	FALSE	NA	NA	NA	TRUE	NA	NA	NA	NA	NA	TRUE	NA	NA	TRUE	NA	TRUE
38964898	Olfml2a	chr2	+	38931978	38965240	3.89649e+07	45.1016	1	38964758	38965028	270	Olfml2a:chr2:38964758-38965028:+	Olfml2a:4	38964898	38965198		NA	38964598	38965198	NA	NA	NA	NA	NA	NA	NA	NA	NA	NA	58155	NA	54,55,56,57,58,59,60,61,62,63,64,65,66,67,68,69,70,71,72,73,74	FALSE	NA	NA	NA	NA	NA	NA	NA	NA	NA	NA	TRUE	NA	TRUE	FALSE	TRUE
87435507	Olfr1124	chr2	+	87430275	87436623	8.74355e+07	39.7538	1	87435401	87435639	238	Olfr1124:chr2:87435401-87435639:+	Olfr1124:1	87435507	87435807		NA	87435207	87435807	NA	NA	NA	NA	NA	NA	NA	NA	108269	216	99103	NA	85,86,87,88,89,90,91,92	FALSE	NA	NA	NA	NA	NA	NA	NA	NA	TRUE	FALSE	TRUE	NA	TRUE	FALSE	TRUE
12033718	Olfr1423	chr19	-	12031787	12041317	1.20337e+07	41.2215	1	12033566	12033814	248	Olfr1423:chr19:12033566-12033814:-	Olfr1423:1	12033418	12033718		NA	12033418	12034018	82	104204	NA	NA	NA	NA	NA	NA	NA	70,74	NA	NA	84,85,86	FALSE	FALSE	TRUE	NA	NA	NA	NA	NA	NA	NA	FALSE	NA	NA	TRUE	FALSE	TRUE
36909826	Olfr354	chr2	+	36905680	36916038	3.69098e+07	15.123	1	36909786	36909877	91	Olfr354:chr2:36909786-36909877:+	Olfr354:1	36909826	36910126		NA	36909526	36910126	NA	84	NA	NA	NA	NA	NA	10	NA	NA	NA	3.91703e+16	31,32,33,34,35,36	FALSE	NA	FALSE	NA	NA	NA	NA	NA	FALSE	NA	NA	NA	TRUE	TRUE	FALSE	TRUE
72102184	Olfr373	chr8	+	72083177	72103084	7.21022e+07	35.0163	1	72102050	72102260	210	Olfr373:chr8:72102050-72102260:+	Olfr373:1	72102184	72102484		NA	72101884	72102484	NA	NA	NA	NA	NA	146	NA	102	NA	NA	NA	NA	NA	FALSE	NA	NA	NA	NA	NA	TRUE	NA	TRUE	NA	NA	NA	NA	TRUE	NA	TRUE
102883916	Olfr569	chr7	-	102883709	102890882	1.02884e+08	34.9266	1	102883794	102884004	210	Olfr569:chr7:102883794-102884004:-	Olfr569:1	102883709	102883916		NA	102883616	102884216	NA	NA	NA	NA	NA	3177	NA	NA	NA	NA	NA	NA	NA	FALSE	NA	NA	NA	NA	NA	TRUE	NA	NA	NA	NA	NA	NA	TRUE	NA	TRUE
[truncated: 1,058 more rows]
