# Supplementary material for: Infernape uncovers cell type–specific and spatially resolved alternative polyadenylation in the brain
Source: HighWire-hosted journal article supplement (doi:10.1101/gr.277864.123), 2023-10-01
Supplement: Supplemental_Tables.zip [file Supplemental_Table_S2.xlsx]

## Sheet: README
	Table legend
	This table shows differential PA events between cell-type pairs in the E14.5 mouse brain scRNA-seq dataset.
	The sheet name is of format 'A.B.vs.C'
	where 'A' represents the type of test:
	gene: gene-level
	utr: within-UTR level
	btw: across-UTR level
	'B' and 'C' represent the baseline and alternative cell-type in comparison, respectively.
	For example, sheet 'gene.rgc.vs.neu' shows the differential PA events for comparing RGC with Neuron by using the gene-level test.

## Sheet: gene.rgc.vs.neu
	pval.chisq	pval.DM	warm.base	warm.alt	delta.warm	low.pct.flag	max.log.or	max.abs.log.or.id	max.prpchg	max.abs.prpchg.id	prp.dif.base	prp.dif.alt	pks	gene	pval.chisq.adj	pval.DM.adj	sig.chisq	sig.DM	pval.inter	pval.adj	sig
1	0.0297002	NA	1	0	1	TRUE	Inf	2 vs 1	2	2 vs 1	1	-1	Mylk:chr16:35000299-35000592:1, Mylk:chr16:35002109-35002375:1	Mylk	NA	NA	FALSE	FALSE	0.0297002	NA	FALSE
2	1	NA	1	0	1	TRUE	Inf	1 vs 2	2	1 vs 2	1	-1	Sox17:chr1:4490938-4491265:-1, Sox17:chr1:4491300-4491797:-1	Sox17	NA	NA	FALSE	FALSE	1	NA	FALSE
3	0.00463661	NA	0.916667	0	0.916667	TRUE	Inf	1 vs 4	1.83333	1 vs 4	0.833333	-1	Rbpms:chr8:33782624-33783000:-1, Rbpms:chr8:33782920-33783188:-1, Rbpms:chr8:33784095-33784229:-1, Rbpms:chr8:33803996-33804263:-1	Rbpms	NA	NA	FALSE	FALSE	0.00463661	NA	FALSE
4	0.41926	NA	0.925	0.5	0.425	TRUE	Inf	3 vs 2	1.7	3 vs 2	0.7	-1	Eva1a:chr6:82092478-82092645:1, Eva1a:chr6:82092622-82092924:1, Eva1a:chr6:82092748-82093099:1	Eva1a	NA	NA	FALSE	FALSE	0.41926	NA	FALSE
5	0.135335	NA	0.666667	0	0.666667	TRUE	Inf	2 vs 1	1.66667	2 vs 1	0.666667	-1	Heyl:chr4:123247147-123247578:1, Heyl:chr4:123248414-123248709:1, Heyl:chr4:123249503-123249888:1	Heyl	NA	NA	FALSE	FALSE	0.135335	NA	FALSE
6	0.0235473	NA	0.73913	0	0.73913	TRUE	Inf	1 vs 2	1.47826	1 vs 2	0.478261	-1	Commd1b:chr11:22834674-22835228:-1, Commd1b:chr11:22836122-22836390:-1	Commd1b	NA	NA	FALSE	FALSE	0.0235473	NA	FALSE
7	0.644577	NA	1	0.275	0.725	TRUE	Inf	1 vs 2	1.45	1 vs 2	1	-0.45	Efcab6:chr15:83866244-83866666:-1, Efcab6:chr15:83866677-83867100:-1	Efcab6	NA	NA	FALSE	FALSE	0.644577	NA	FALSE
8	0.158291	NA	1	0.290323	0.709677	TRUE	Inf	3 vs 1	1.41935	3 vs 1	1	-0.419355	Foxq1:chr13:31560134-31560435:1, Foxq1:chr13:31560385-31560605:1, Foxq1:chr13:31560594-31560976:1	Foxq1	NA	NA	FALSE	FALSE	0.158291	NA	FALSE
9	0.0718978	NA	0.666667	0	0.666667	TRUE	Inf	2 vs 1	1.4	2 vs 1	0.4	-1	Ebf2:chr14:67428082-67428767:1, Ebf2:chr14:67429484-67429721:1, Ebf2:chr14:67430566-67430952:1, Ebf2:chr14:67430700-67430913:1	Ebf2	NA	NA	FALSE	FALSE	0.0718978	NA	FALSE
10	0.75702	NA	0.692308	0	0.692308	TRUE	Inf	1 vs 2	1.38462	1 vs 2	0.384615	-1	Ptges:chr2:30891756-30892125:-1, Ptges:chr2:30892195-30892668:-1	Ptges	NA	NA	FALSE	FALSE	0.75702	NA	FALSE
11	0.0778329	NA	0.5	0.414894	0.0851064	TRUE	Inf	2 vs 1	1.3617	2 vs 1	1	-0.361702	Rgs6:chr12:83158358-83158807:1, Rgs6:chr12:83158546-83158756:1, Rgs6:chr12:83161553-83161764:1	Rgs6	NA	NA	FALSE	FALSE	0.0778329	NA	FALSE
12	1	NA	1	0.666667	0.333333	TRUE	Inf	3 vs 2	1.33333	3 vs 2	1	-0.333333	Bmp5:chr9:75898376-75898647:1, Bmp5:chr9:75898409-75898975:1, Bmp5:chr9:75900001-75900280:1	Bmp5	NA	NA	FALSE	FALSE	1	NA	FALSE
13	0.147232	NA	1	0.333333	0.666667	TRUE	Inf	1 vs 2	1.33333	1 vs 2	1	-0.333333	Chrna3:chr9:55011541-55011822:-1, Chrna3:chr9:55012440-55012956:-1	Chrna3	NA	NA	FALSE	FALSE	0.147232	NA	FALSE
14	0.57615	NA	1	0.333333	0.666667	TRUE	Inf	1 vs 2	1.33333	1 vs 2	1	-0.333333	Ggta1:chr2:35400129-35400550:-1, Ggta1:chr2:35400591-35400678:-1	Ggta1	NA	NA	FALSE	FALSE	0.57615	NA	FALSE
15	0.779288	NA	0.666667	0	0.666667	TRUE	Inf	1 vs 2	1.33333	1 vs 2	0.333333	-1	Kank2:chr9:21766768-21767127:-1, Kank2:chr9:21768106-21768286:-1	Kank2	NA	NA	FALSE	FALSE	0.779288	NA	FALSE
16	1	NA	1	0.333333	0.666667	TRUE	Inf	1 vs 2	1.33333	1 vs 2	1	-0.333333	Plek:chr11:16971378-16971846:-1, Plek:chr11:16973699-16974131:-1	Plek	NA	NA	FALSE	FALSE	1	NA	FALSE
17	0.757967	NA	1	0.340426	0.659574	TRUE	Inf	2 vs 1	1.31915	2 vs 1	1	-0.319149	Adamts17:chr7:67152231-67152662:1, Adamts17:chr7:67152376-67152588:1	Adamts17	NA	NA	FALSE	FALSE	0.757967	NA	FALSE
18	0.26829	NA	0.458333	0	0.458333	TRUE	Inf	1 vs 3	1.28333	2 vs 3	0.283333	-1	Wdsub1:chr2:59852358-59852512:-1, Wdsub1:chr2:59852393-59852651:-1, Wdsub1:chr2:59852768-59853000:-1	Wdsub1	NA	NA	FALSE	FALSE	0.26829	NA	FALSE
19	0.79006	NA	0.64	0	0.64	TRUE	Inf	2 vs 1	1.28	2 vs 1	0.28	-1	Tanc1:chr2:59843769-59844640:1, Tanc1:chr2:59845299-59845765:1	Tanc1	NA	NA	FALSE	FALSE	0.79006	NA	FALSE
20	0.00407698	0.00883776	0.729642	0.1	0.629642	TRUE	Inf	1 vs 2	1.25928	1 vs 3	0.459283	-0.8	Sall1:chr8:89027226-89027600:-1, Sall1:chr8:89027396-89027789:-1, Sall1:chr8:89027914-89028343:-1	Sall1	NA	NA	FALSE	FALSE	0.00883776	NA	FALSE
21	0	3.21326e-302	0.460218	0.298564	0.161654	FALSE	-3.90133	2 vs 3	1.20725	3 vs 5	0.762144	-0.445101	Elavl1:chr8:4284796-4285437:-1, Elavl1:chr8:4285336-4285761:-1, Elavl1:chr8:4288319-4288705:-1, Elavl1:chr8:4289049-4289190:-1, Elavl1:chr8:4289443-4289907:-1	Elavl1	0	3.89125e-299	TRUE	TRUE	3.21326e-302	4.08084e-299	TRUE
22	0.438578	NA	0.6	0	0.6	TRUE	Inf	2 vs 1	1.2	2 vs 1	0.2	-1	Galnt4:chr10:99110430-99110742:1, Galnt4:chr10:99112845-99113247:1	Galnt4	NA	NA	FALSE	FALSE	0.438578	NA	FALSE
23	0.851711	NA	1	0.402174	0.597826	TRUE	Inf	2 vs 1	1.19565	2 vs 1	1	-0.195652	Kcnu1:chr8:25937457-25937886:1, Kcnu1:chr8:25937670-25937906:1	Kcnu1	NA	NA	FALSE	FALSE	0.851711	NA	FALSE
24	0.200916	NA	0.575758	0.333333	0.242424	TRUE	#NAME?	2 vs 1	1.19481	4 vs 2	0.194805	-1	Mdfic:chr6:15773016-15773280:1, Mdfic:chr6:15800428-15800931:1, Mdfic:chr6:15801617-15802273:1, Mdfic:chr6:15801861-15802162:1	Mdfic	NA	NA	FALSE	FALSE	0.200916	NA	FALSE
25	0.128119	NA	0.5	0.349315	0.150685	TRUE	Inf	2 vs 1	1.17808	2 vs 1	1	-0.178082	Ptpre:chr7:135683194-135683302:1, Ptpre:chr7:135684519-135684813:1, Ptpre:chr7:135685924-135686294:1	Ptpre	NA	NA	FALSE	FALSE	0.128119	NA	FALSE
26	0.117786	NA	0.444444	0.166667	0.277778	TRUE	#NAME?	2 vs 1	1.16667	3 vs 2	0.666667	-0.5	Nxph1:chr6:9248415-9248991:1, Nxph1:chr6:9248136-9249318:1, Nxph1:chr6:9248722-9248996:1, Nxph1:chr6:9249296-9249604:1	Nxph1	NA	NA	FALSE	FALSE	0.117786	NA	FALSE
27	0.00564791	NA	0.583333	0	0.583333	TRUE	Inf	2 vs 1	1.16667	3 vs 1	0.166667	-1	Rad54b:chr4:11585390-11585756:1, Rad54b:chr4:11615417-11615544:1, Rad54b:chr4:11615436-11615808:1	Rad54b	NA	NA	FALSE	FALSE	0.00564791	NA	FALSE
28	0.019964	NA	0.666667	0.0849057	0.581761	TRUE	3.07063	2 vs 1	1.16352	2 vs 1	0.333333	-0.830189	Akr1c19:chr13:4248005-4248392:1, Akr1c19:chr13:4249446-4249793:1	Akr1c19	NA	NA	FALSE	FALSE	0.019964	NA	FALSE
29	0.0196048	NA	0.394231	0.222222	0.172009	TRUE	Inf	1 vs 2	1.13782	3 vs 4	0.471154	-0.666667	Elk3:chr10:93247438-93247695:-1, Elk3:chr10:93247412-93247956:-1, Elk3:chr10:93249320-93249658:-1, Elk3:chr10:93249710-93250142:-1	Elk3	NA	NA	FALSE	FALSE	0.0196048	NA	FALSE
30	0.507307	NA	0.764463	0.5	0.264463	TRUE	#NAME?	2 vs 1	1.13223	3 vs 2	0.132231	-1	Aspm:chr1:139493633-139493761:1, Aspm:chr1:139493655-139493905:1, Aspm:chr1:139493846-139494032:1	Aspm	NA	NA	FALSE	FALSE	0.507307	NA	FALSE
31	0.038875	NA	0.857143	0.294118	0.563025	TRUE	2.66723	2 vs 1	1.12605	2 vs 1	0.714286	-0.411765	Gm3278:chr14:4901766-4902138:1, Gm3278:chr14:4902023-4902431:1	Gm3278	NA	NA	FALSE	FALSE	0.038875	NA	FALSE
32	0.48435	NA	0.368159	0	0.368159	TRUE	Inf	2 vs 4	1.10448	2 vs 4	0.104478	-1	Slc25a13:chr6:6041274-6041469:-1, Slc25a13:chr6:6041214-6041552:-1, Slc25a13:chr6:6041285-6041712:-1, Slc25a13:chr6:6041714-6042190:-1	Slc25a13	NA	NA	FALSE	FALSE	0.48435	NA	FALSE
33	0.126105	NA	0.875	0.333333	0.541667	TRUE	2.63906	2 vs 1	1.08333	2 vs 1	0.75	-0.333333	S1pr3:chr13:51421473-51422137:1, S1pr3:chr13:51421818-51422174:1	S1pr3	NA	NA	FALSE	FALSE	0.126105	NA	FALSE
34	0.0281995	NA	0.647059	0.111111	0.535948	TRUE	2.68558	1 vs 2	1.0719	1 vs 2	0.294118	-0.777778	Sfxn5:chr6:85213376-85213537:-1, Sfxn5:chr6:85299092-85299420:-1	Sfxn5	NA	NA	FALSE	FALSE	0.0281995	NA	FALSE
35	0.502995	NA	0.529412	0	0.529412	TRUE	Inf	2 vs 1	1.05882	2 vs 1	0.0588235	-1	Fbln2:chr6:91271790-91272245:1, Fbln2:chr6:91272126-91272540:1	Fbln2	NA	NA	FALSE	FALSE	0.502995	NA	FALSE
36	0.237615	NA	1	0.503401	0.496599	TRUE	Inf	6 vs 1	1.04762	6 vs 3	1	-0.047619	Cntn1:chr15:92339479-92340050:1, Cntn1:chr15:92339687-92340049:1, Cntn1:chr15:92339822-92340070:1, Cntn1:chr15:92341363-92341921:1, Cntn1:chr15:92341471-92341656:1, Cntn1:chr15:92341655-92341929:1	Cntn1	NA	NA	FALSE	FALSE	0.237615	NA	FALSE
37	0.588304	NA	1	0.490814	0.509186	TRUE	Inf	4 vs 1	1.0315	4 vs 1	1	-0.0314961	Phf24:chr4:42939447-42939959:1, Phf24:chr4:42941071-42941710:1, Phf24:chr4:42941311-42941570:1, Phf24:chr4:42943797-42944199:1	Phf24	NA	NA	FALSE	FALSE	0.588304	NA	FALSE
38	0.00685136	NA	0.34	0.166667	0.173333	TRUE	#NAME?	1 vs 2	1.02667	2 vs 3	0.36	-0.666667	Zfp456:chr13:67365653-67365942:-1, Zfp456:chr13:67365812-67366045:-1, Zfp456:chr13:67365404-67366430:-1	Zfp456	NA	NA	FALSE	FALSE	0.00685136	NA	FALSE
39	0.283804	NA	0.5	0	0.5	TRUE	Inf	2 vs 1	1	3 vs 1	0	-1	Adora2b:chr11:62265689-62266161:1, Adora2b:chr11:62266048-62266289:1, Adora2b:chr11:62266134-62266434:1	Adora2b	NA	NA	FALSE	FALSE	0.283804	NA	FALSE
40	0.759463	NA	0.5	0	0.5	TRUE	Inf	1 vs 2	1	1 vs 2	0	-1	Npnt:chr3:132881752-132882027:-1, Npnt:chr3:132882709-132883024:-1	Npnt	NA	NA	FALSE	FALSE	0.759463	NA	FALSE
41	0.759463	NA	0.5	0	0.5	TRUE	Inf	1 vs 2	1	1 vs 2	0	-1	Rapgef3:chr15:97744759-97745430:-1, Rapgef3:chr15:97744987-97745272:-1	Rapgef3	NA	NA	FALSE	FALSE	0.759463	NA	FALSE
42	0.0570609	NA	1	0.5	0.5	TRUE	Inf	3 vs 1	1	3 vs 1	1	0	Rtl10:chr16:18502272-18502541:1, Rtl10:chr16:18502833-18503054:1, Rtl10:chr16:18502978-18503460:1	Rtl10	NA	NA	FALSE	FALSE	0.0570609	NA	FALSE
43	1	NA	1	0.5	0.5	TRUE	Inf	1 vs 4	1	1 vs 4	1	0	Slc40a1:chr1:45908081-45908552:-1, Slc40a1:chr1:45908335-45908811:-1, Slc40a1:chr1:45909301-45909546:-1, Slc40a1:chr1:45909213-45909758:-1	Slc40a1	NA	NA	FALSE	FALSE	1	NA	FALSE
44	0.338465	NA	0.6875	0.5	0.1875	TRUE	Inf	1 vs 2	1	1 vs 2	0	-1	Steap2:chr5:5670046-5670380:-1, Steap2:chr5:5671728-5672035:-1, Steap2:chr5:5671918-5672170:-1	Steap2	NA	NA	FALSE	FALSE	0.338465	NA	FALSE
45	0.00159968	NA	0.59589	0.1	0.49589	TRUE	Inf	3 vs 1	0.991781	3 vs 1	0.191781	-0.8	Hhipl1:chr12:108329208-108329532:1, Hhipl1:chr12:108330553-108330826:1, Hhipl1:chr12:108330258-108331143:1	Hhipl1	NA	NA	FALSE	FALSE	0.00159968	NA	FALSE
46	4.7066e-155	3.42646e-105	0.576147	0.100143	0.476004	FALSE	2.50261	2 vs 1	0.952007	2 vs 1	0.152294	-0.799714	Klc1:chr12:111794499-111794943:1, Klc1:chr12:111806348-111806728:1	Klc1	2.39095e-152	1.65978e-102	TRUE	TRUE	3.42646e-105	1.74064e-102	TRUE
47	1	NA	1	0.525	0.475	TRUE	Inf	1 vs 2	0.95	1 vs 2	1	0.05	Tenm1:chrX:42527866-42528314:-1, Tenm1:chrX:42528726-42529023:-1	Tenm1	NA	NA	FALSE	FALSE	1	NA	FALSE
48	6.26493e-06	NA	0.9	0.43038	0.46962	TRUE	2.47753	2 vs 1	0.939241	2 vs 1	0.8	-0.139241	Lamb1:chr12:31329304-31329641:1, Lamb1:chr12:31330733-31330928:1	Lamb1	NA	NA	FALSE	FALSE	6.26493e-06	NA	FALSE
49	0.0154946	NA	0.714286	0.5125	0.201786	TRUE	2.5177	3 vs 2	0.935714	3 vs 2	0.285714	-0.65	Cd59b:chr2:104084594-104085670:1, Cd59b:chr2:104085138-104085332:1, Cd59b:chr2:104090934-104091137:1	Cd59b	NA	NA	FALSE	FALSE	0.0154946	NA	FALSE
50	0.0354873	NA	0.75	0.296296	0.453704	TRUE	Inf	2 vs 1	0.907407	3 vs 1	0.5	-0.407407	Adamts4:chr1:171259618-171259900:1, Adamts4:chr1:171260305-171260650:1, Adamts4:chr1:171261984-171262232:1	Adamts4	NA	NA	FALSE	FALSE	0.0354873	NA	FALSE
51	0.0185143	NA	0.775862	0.5	0.275862	TRUE	2.83321	1 vs 2	0.896552	1 vs 2	0.646552	-0.25	Axl:chr7:25757276-25757597:-1, Axl:chr7:25757102-25757834:-1, Axl:chr7:25757431-25758297:-1	Axl	NA	NA	FALSE	FALSE	0.0185143	NA	FALSE
52	0.229217	NA	1	0.555556	0.444444	TRUE	Inf	1 vs 2	0.888889	1 vs 2	1	0.111111	Cacna1d:chr14:30039944-30040262:-1, Cacna1d:chr14:30061110-30061471:-1	Cacna1d	NA	NA	FALSE	FALSE	0.229217	NA	FALSE
53	0.104914	NA	1	0.555556	0.444444	TRUE	Inf	1 vs 2	0.888889	1 vs 2	1	0.111111	Zfp791:chr8:85108555-85108870:-1, Zfp791:chr8:85109253-85109596:-1	Zfp791	NA	NA	FALSE	FALSE	0.104914	NA	FALSE
54	0.0273278	NA	0.714286	0.272397	0.441889	TRUE	#NAME?	2 vs 1	0.883777	3 vs 1	0.428571	-0.455206	Tes:chr6:17104542-17104826:1, Tes:chr6:17104713-17105020:1, Tes:chr6:17105420-17105828:1	Tes	NA	NA	FALSE	FALSE	0.0273278	NA	FALSE
55	0.420264	NA	1	0.558824	0.441176	TRUE	Inf	3 vs 1	0.882353	3 vs 1	1	0.117647	Rapgef5:chr12:117756810-117757203:1, Rapgef5:chr12:117759159-117759266:1, Rapgef5:chr12:117759137-117759666:1	Rapgef5	NA	NA	FALSE	FALSE	0.420264	NA	FALSE
56	2.58361e-20	1.68985e-23	0.855172	0.401176	0.453996	TRUE	Inf	2 vs 1	0.87931	5 vs 2	0.37931	-0.5	Aak1:chr6:86991243-86991907:1, Aak1:chr6:86991511-86991897:1, Aak1:chr6:86994318-86994610:1, Aak1:chr6:87002523-87002824:1, Aak1:chr6:87002763-87003217:1, Aak1:chr6:87002925-87003227:1	Aak1	NA	NA	FALSE	FALSE	2.58361e-20	NA	FALSE
57	3.48091e-08	NA	0.833333	0.394737	0.438596	TRUE	2.03688	2 vs 1	0.877193	2 vs 1	0.666667	-0.210526	Baiap2:chr11:120002276-120002622:1, Baiap2:chr11:120006418-120006782:1	Baiap2	NA	NA	FALSE	FALSE	3.48091e-08	NA	FALSE
58	9.78974e-05	NA	0.746667	0.310345	0.436322	TRUE	1.87942	1 vs 2	0.872644	1 vs 2	0.493333	-0.37931	Slc15a2:chr16:36750164-36750555:-1, Slc15a2:chr16:36771822-36772224:-1	Slc15a2	NA	NA	FALSE	FALSE	9.78974e-05	NA	FALSE
59	0.605141	NA	1	0.56391	0.43609	TRUE	Inf	1 vs 2	0.87218	1 vs 2	1	0.12782	Faim2:chr15:99498612-99499032:-1, Faim2:chr15:99500026-99500362:-1	Faim2	NA	NA	FALSE	FALSE	0.605141	NA	FALSE
60	0.388212	NA	0.666667	0.466667	0.2	TRUE	#NAME?	2 vs 1	0.866667	4 vs 2	0.666667	-0.2	Rhoj:chr12:75400522-75400997:1, Rhoj:chr12:75400216-75401311:1, Rhoj:chr12:75400770-75400989:1, Rhoj:chr12:75401122-75401454:1	Rhoj	NA	NA	FALSE	FALSE	0.388212	NA	FALSE
61	0.0362796	NA	0.571429	0.214286	0.357143	TRUE	2.52573	2 vs 1	0.857143	2 vs 1	0.285714	-0.571429	Ctbs:chr3:146463916-146464272:1, Ctbs:chr3:146464759-146465054:1, Ctbs:chr3:146465456-146465821:1	Ctbs	NA	NA	FALSE	FALSE	0.0362796	NA	FALSE
62	0.125661	NA	0.857143	0.428571	0.428571	TRUE	2.07944	1 vs 2	0.857143	1 vs 2	0.714286	-0.142857	Gm3755:chr14:7440924-7441253:-1, Gm3755:chr14:7441247-7441719:-1	Gm3755	NA	NA	FALSE	FALSE	0.125661	NA	FALSE
63	0.599275	NA	0.5	0.0952381	0.404762	TRUE	2.25129	2 vs 1	0.809524	2 vs 1	0	-0.809524	Pcdhb3:chr18:37303531-37304007:1, Pcdhb3:chr18:37303892-37304165:1	Pcdhb3	NA	NA	FALSE	FALSE	0.599275	NA	FALSE
64	0.0651524	NA	0.7	0.296296	0.403704	TRUE	1.7123	1 vs 2	0.807407	1 vs 2	0.4	-0.407407	Tet2:chr3:133463677-133463998:-1, Tet2:chr3:133465839-133466246:-1	Tet2	NA	NA	FALSE	FALSE	0.0651524	NA	FALSE
65	0.0950127	NA	0.903614	0.5	0.403614	TRUE	2.23805	1 vs 2	0.807229	1 vs 2	0.807229	0	Itgb8:chr12:119158022-119158399:-1, Itgb8:chr12:119158022-119158750:-1	Itgb8	NA	NA	FALSE	FALSE	0.0950127	NA	FALSE
66	0.729034	NA	0.9	0.5	0.4	TRUE	2.19722	2 vs 1	0.8	2 vs 1	0.8	0	Arsg:chr11:109572885-109573206:1, Arsg:chr11:109573024-109573334:1	Arsg	NA	NA	FALSE	FALSE	0.729034	NA	FALSE
67	0.0918679	NA	0.9	0.5	0.4	TRUE	Inf	1 vs 3	0.8	1 vs 3	0.8	0	Cdkl1:chr12:69746350-69746520:-1, Cdkl1:chr12:69746502-69747257:-1, Cdkl1:chr12:69747158-69747627:-1	Cdkl1	NA	NA	FALSE	FALSE	0.0918679	NA	FALSE
68	0.729034	NA	0.9	0.5	0.4	TRUE	2.19722	2 vs 1	0.8	2 vs 1	0.8	0	Jcad:chr18:4682367-4682869:1, Jcad:chr18:4682591-4682860:1	Jcad	NA	NA	FALSE	FALSE	0.729034	NA	FALSE
69	0.869204	NA	0.50641	0.5	0.00641026	TRUE	Inf	1 vs 3	0.794872	1 vs 3	-0.205128	-1	Eif2ak2:chr17:78852534-78852902:-1, Eif2ak2:chr17:78852742-78853225:-1, Eif2ak2:chr17:78853097-78853494:-1, Eif2ak2:chr17:78854472-78854793:-1, Eif2ak2:chr17:78854581-78855084:-1	Eif2ak2	NA	NA	FALSE	FALSE	0.869204	NA	FALSE
70	8.01638e-05	NA	0.867647	0.471591	0.396056	TRUE	2.72944	1 vs 3	0.792112	1 vs 3	0.735294	-0.0568182	Gm14296:chr2:176914048-176914423:-1, Gm14296:chr2:176914752-176915135:-1, Gm14296:chr2:176915603-176916025:-1	Gm14296	NA	NA	FALSE	FALSE	8.01638e-05	NA	FALSE
71	1	NA	1	0.604651	0.395349	TRUE	Inf	1 vs 2	0.790698	1 vs 2	1	0.209302	Grin1:chr2:25291177-25291428:-1, Grin1:chr2:25291202-25291573:-1	Grin1	NA	NA	FALSE	FALSE	1	NA	FALSE
72	0.0244586	NA	0.894737	0.5	0.394737	TRUE	2.14007	2 vs 1	0.789474	2 vs 1	0.789474	0	Emp1:chr6:135381749-135382467:1, Emp1:chr6:135382794-135383205:1	Emp1	NA	NA	FALSE	FALSE	0.0244586	NA	FALSE
73	1	NA	1	0.608696	0.391304	TRUE	Inf	2 vs 1	0.782609	2 vs 1	1	0.217391	Pcdhb14:chr18:37449990-37451103:1, Pcdhb14:chr18:37450395-37450841:1	Pcdhb14	NA	NA	FALSE	FALSE	1	NA	FALSE
74	0.714495	NA	1	0.609756	0.390244	TRUE	Inf	1 vs 2	0.780488	1 vs 2	1	0.219512	Ndst3:chr3:123526166-123526517:-1, Ndst3:chr3:123526576-123527063:-1	Ndst3	NA	NA	FALSE	FALSE	0.714495	NA	FALSE
75	0.147433	NA	0.857143	0.46875	0.388393	TRUE	1.91692	2 vs 1	0.776786	2 vs 1	0.714286	-0.0625	Magel2:chr7:62381171-62381635:1, Magel2:chr7:62381354-62381630:1	Magel2	NA	NA	FALSE	FALSE	0.147433	NA	FALSE
76	8.28168e-59	9.66757e-55	0.904167	0.625083	0.279084	FALSE	2.49026	1 vs 4	0.774109	1 vs 2	0.685	-0.0891089	Masp1:chr16:23468340-23468693:-1, Masp1:chr16:23479305-23479624:-1, Masp1:chr16:23479392-23479761:-1, Masp1:chr16:23479621-23480204:-1	Masp1	1.31472e-56	1.95124e-52	TRUE	TRUE	9.66757e-55	2.0463e-52	TRUE
77	0.00719487	NA	0.86	0.65625	0.20375	TRUE	2.10476	3 vs 2	0.77375	3 vs 2	0.68	-0.09375	Zfp446:chr7:12982901-12983221:1, Zfp446:chr7:12983647-12984456:1, Zfp446:chr7:12984016-12984408:1	Zfp446	NA	NA	FALSE	FALSE	0.00719487	NA	FALSE
78	1	NA	0.384615	0	0.384615	TRUE	Inf	1 vs 2	0.769231	1 vs 2	-0.230769	-1	Wipf1:chr2:73429614-73429937:-1, Wipf1:chr2:73430731-73431221:-1	Wipf1	NA	NA	FALSE	FALSE	1	NA	FALSE
79	0.700985	NA	1	0.616803	0.383197	TRUE	Inf	1 vs 2	0.766393	1 vs 2	1	0.233607	Camk2b:chr11:5969710-5969941:-1, Camk2b:chr11:5971554-5971895:-1	Camk2b	NA	NA	FALSE	FALSE	0.700985	NA	FALSE
80	0.259332	NA	0.666667	0.285714	0.380952	TRUE	1.60944	1 vs 2	0.761905	1 vs 2	0.333333	-0.428571	Fyco1:chr9:123789500-123789790:-1, Fyco1:chr9:123792599-123792816:-1	Fyco1	NA	NA	FALSE	FALSE	0.259332	NA	FALSE
81	1	NA	0.375	0	0.375	TRUE	Inf	2 vs 1	0.75	2 vs 1	-0.25	-1	Fgd6:chr10:94141673-94141976:1, Fgd6:chr10:94145051-94145294:1	Fgd6	NA	NA	FALSE	FALSE	1	NA	FALSE
82	1	NA	0.375	0	0.375	TRUE	Inf	2 vs 1	0.75	2 vs 1	-0.25	-1	Wnt6:chr1:74784475-74785011:1, Wnt6:chr1:74784995-74785308:1	Wnt6	NA	NA	FALSE	FALSE	1	NA	FALSE
83	0.000365089	NA	0.8125	0.44	0.3725	TRUE	1.7075	1 vs 2	0.745	1 vs 2	0.625	-0.12	Rarg:chr15:102233493-102233571:-1, Rarg:chr15:102234877-102235292:-1	Rarg	NA	NA	FALSE	FALSE	0.000365089	NA	FALSE
84	0.129658	NA	0.833333	0.6	0.233333	TRUE	#NAME?	1 vs 2	0.733333	2 vs 3	0.333333	-0.4	Cfap69:chr5:5581034-5581320:-1, Cfap69:chr5:5581166-5581334:-1, Cfap69:chr5:5581243-5581389:-1	Cfap69	NA	NA	FALSE	FALSE	0.129658	NA	FALSE
85	0.639517	NA	0.7	0.333333	0.366667	TRUE	1.54045	2 vs 1	0.733333	2 vs 1	0.4	-0.333333	Dlk1:chr12:109460087-109460699:1, Dlk1:chr12:109460343-109460622:1	Dlk1	NA	NA	FALSE	FALSE	0.639517	NA	FALSE
86	0.668385	NA	0.865672	0.5	0.365672	TRUE	1.86322	2 vs 1	0.731343	2 vs 1	0.731343	0	Rtkn2:chr10:68041927-68042408:1, Rtkn2:chr10:68042181-68042514:1	Rtkn2	NA	NA	FALSE	FALSE	0.668385	NA	FALSE
87	0.0665617	NA	0.409091	0.178571	0.230519	TRUE	1.74297	2 vs 3	0.727273	2 vs 3	0.227273	-0.5	Slc35a3:chr3:116669542-116669767:-1, Slc35a3:chr3:116669593-116670327:-1, Slc35a3:chr3:116673109-116673539:-1	Slc35a3	NA	NA	FALSE	FALSE	0.0665617	NA	FALSE
88	9.52018e-05	0.00136055	0.574074	0.211165	0.362909	TRUE	1.79638	1 vs 3	0.725818	1 vs 3	0.148148	-0.57767	Nin:chr12:70011433-70011781:-1, Nin:chr12:70012069-70012458:-1, Nin:chr12:70018685-70019106:-1	Nin	NA	NA	FALSE	FALSE	0.00136055	NA	FALSE
89	0.068796	NA	0.645833	0.285714	0.360119	TRUE	Inf	3 vs 1	0.720238	3 vs 1	0.291667	-0.428571	Bmp2k:chr5:97069294-97069656:1, Bmp2k:chr5:97088492-97088801:1, Bmp2k:chr5:97091562-97091873:1	Bmp2k	NA	NA	FALSE	FALSE	0.068796	NA	FALSE
90	1.53762e-23	7.91784e-26	0.773653	0.490746	0.282906	FALSE	Inf	1 vs 5	0.718938	2 vs 4	0.844311	0.125373	Asph:chr4:9451251-9451624:-1, Asph:chr4:9575203-9575649:-1, Asph:chr4:9621710-9622055:-1, Asph:chr4:9628618-9629023:-1, Asph:chr4:9629767-9630014:-1, Asph:chr4:9629787-9630361:-1	Asph	5.42438e-22	3.36439e-24	TRUE	TRUE	1.53762e-23	6.40254e-22	TRUE
91	5.13664e-52	5.62177e-38	0.657328	0.299253	0.358075	FALSE	1.50227	1 vs 2	0.71615	1 vs 2	0.314655	-0.401495	Atat1:chr17:35897595-35897947:-1, Atat1:chr17:35899766-35900219:-1	Atat1	6.21288e-50	4.53864e-36	TRUE	TRUE	5.62177e-38	4.75977e-36	TRUE
92	0.0770095	NA	0.45614	0.1	0.35614	TRUE	2.02133	1 vs 2	0.712281	1 vs 2	-0.0877193	-0.8	Tirap:chr9:35186716-35187153:-1, Tirap:chr9:35187314-35187697:-1	Tirap	NA	NA	FALSE	FALSE	0.0770095	NA	FALSE
93	0.311048	NA	0.555556	0.2	0.355556	TRUE	1.60944	2 vs 1	0.711111	2 vs 1	0.111111	-0.6	Sp8:chr12:118850130-118850583:1, Sp8:chr12:118852202-118852578:1	Sp8	NA	NA	FALSE	FALSE	0.311048	NA	FALSE
94	0.766182	NA	0.353591	0	0.353591	TRUE	Inf	1 vs 2	0.707182	1 vs 2	-0.292818	-1	Cdca2:chr14:67676335-67676696:-1, Cdca2:chr14:67676645-67677072:-1	Cdca2	NA	NA	FALSE	FALSE	0.766182	NA	FALSE
95	1.02599e-14	2.20064e-13	0.565359	0.276094	0.289265	TRUE	3.44999	3 vs 6	0.701277	3 vs 7	0.357843	-0.343434	Magi1:chr6:93675440-93675770:-1, Magi1:chr6:93676583-93677178:-1, Magi1:chr6:93678009-93678367:-1, Magi1:chr6:93680930-93681370:-1, Magi1:chr6:93681180-93681523:-1, Magi1:chr6:93681441-93681745:-1, Magi1:chr6:93682058-93682412:-1	Magi1	NA	NA	FALSE	FALSE	2.20064e-13	NA	FALSE
96	0.0550752	NA	0.444444	0.0967742	0.34767	TRUE	2.01045	2 vs 1	0.695341	2 vs 1	-0.111111	-0.806452	Zfp52:chr17:21561843-21562248:1, Zfp52:chr17:21562313-21562404:1	Zfp52	NA	NA	FALSE	FALSE	0.0550752	NA	FALSE
97	3.91584e-15	2.03653e-16	0.910828	0.568027	0.342801	FALSE	2.04998	2 vs 1	0.685602	2 vs 1	0.821656	0.136054	Arhgef7:chr8:11826818-11827148:1, Arhgef7:chr8:11834860-11835219:1	Arhgef7	8.80198e-14	5.54212e-15	TRUE	TRUE	3.91584e-15	1.03607e-13	TRUE
98	0.458466	NA	0.777778	0.449891	0.327887	TRUE	#NAME?	1 vs 2	0.679739	2 vs 7	0.666667	-0.0130719	Cacng2:chr15:77991764-77992003:-1, Cacng2:chr15:77991748-77992403:-1, Cacng2:chr15:77993610-77993998:-1, Cacng2:chr15:77993866-77994197:-1, Cacng2:chr15:77994609-77994868:-1, Cacng2:chr15:77994688-77995081:-1, Cacng2:chr15:77994952-77995131:-1	Cacng2	NA	NA	FALSE	FALSE	0.458466	NA	FALSE
99	0.000584201	0.00381013	0.666667	0.293173	0.373494	TRUE	2.50471	3 vs 1	0.67759	4 vs 1	0.28	-0.39759	2210408I21Rik:chr13:77192935-77193434:1, 2210408I21Rik:chr13:77193307-77194056:1, 2210408I21Rik:chr13:77193665-77193986:1, 2210408I21Rik:chr13:77612454-77612797:1	2210408I21Rik	NA	NA	FALSE	FALSE	0.00381013	NA	FALSE
100	1	NA	0.333333	0	0.333333	TRUE	Inf	2 vs 1	0.666667	2 vs 1	-0.333333	-1	Arap1:chr7:101411490-101411862:1, Arap1:chr7:101411624-101411892:1	Arap1	NA	NA	FALSE	FALSE	1	NA	FALSE
101	1	NA	0.333333	0	0.333333	TRUE	Inf	3 vs 1	0.666667	3 vs 1	-0.333333	-1	Foxc1:chr13:31809215-31809584:1, Foxc1:chr13:31810050-31810226:1, Foxc1:chr13:31810250-31810687:1	Foxc1	NA	NA	FALSE	FALSE	1	NA	FALSE
102	0.395949	NA	1	0.666667	0.333333	TRUE	Inf	2 vs 1	0.666667	2 vs 1	1	0.333333	Inka2:chr3:105716857-105717291:1, Inka2:chr3:105718886-105719273:1	Inka2	NA	NA	FALSE	FALSE	0.395949	NA	FALSE
103	0.435724	NA	0.5	0.166667	0.333333	TRUE	1.60944	2 vs 1	0.666667	2 vs 1	0	-0.666667	Nos3:chr5:24383841-24384453:1, Nos3:chr5:24384098-24384303:1	Nos3	NA	NA	FALSE	FALSE	0.435724	NA	FALSE
104	0.151486	NA	0.833333	0.5	0.333333	TRUE	1.60944	1 vs 2	0.666667	1 vs 2	0.666667	0	Ooep:chr9:78377370-78377717:-1, Ooep:chr9:78377515-78377732:-1	Ooep	NA	NA	FALSE	FALSE	0.151486	NA	FALSE
105	0.0881151	NA	0.894737	0.5625	0.332237	TRUE	2.48491	3 vs 1	0.664474	3 vs 1	0.789474	0.125	Car2:chr3:14900080-14900700:1, Car2:chr3:14900158-14900733:1, Car2:chr3:14900433-14900750:1	Car2	NA	NA	FALSE	FALSE	0.0881151	NA	FALSE
106	0.0519097	NA	0.713415	0.4	0.313415	TRUE	Inf	2 vs 1	0.660976	2 vs 1	0.0609756	-0.6	Dock1:chr7:134782909-134783172:1, Dock1:chr7:135173108-135173671:1, Dock1:chr7:135173303-135173674:1	Dock1	NA	NA	FALSE	FALSE	0.0519097	NA	FALSE
107	0.193639	NA	0.75	0.571429	0.178571	TRUE	1.60944	1 vs 2	0.660714	1 vs 2	0.375	-0.285714	Zfp597:chr16:3861524-3861874:-1, Zfp597:chr16:3862371-3862733:-1, Zfp597:chr16:3862022-3863206:-1	Zfp597	NA	NA	FALSE	FALSE	0.193639	NA	FALSE
108	0.0524521	0.10576	0.8	0.686579	0.113421	TRUE	-2.20596	2 vs 3	0.660393	1 vs 2	0.5	-0.160393	Hecw1:chr13:14226438-14226805:-1, Hecw1:chr13:14228024-14228408:-1, Hecw1:chr13:14230340-14230624:-1	Hecw1	NA	NA	FALSE	FALSE	0.10576	NA	FALSE
109	0.352991	NA	0.5	0.171053	0.328947	TRUE	Inf	1 vs 2	0.657895	1 vs 3	0	-0.657895	Clvs2:chr10:33512301-33512565:-1, Clvs2:chr10:33512310-33512826:-1, Clvs2:chr10:33512820-33513297:-1	Clvs2	NA	NA	FALSE	FALSE	0.352991	NA	FALSE
110	0.251104	NA	0.628159	0.3	0.328159	TRUE	1.7398	1 vs 3	0.656318	1 vs 3	0.256318	-0.4	Ednrb:chr14:103814615-103815033:-1, Ednrb:chr14:103816624-103817022:-1, Ednrb:chr14:103817068-103817242:-1	Ednrb	NA	NA	FALSE	FALSE	0.251104	NA	FALSE
111	0.00486272	NA	0.483871	0.431034	0.0528365	TRUE	2.35138	1 vs 2	0.655172	1 vs 2	0	-0.655172	Pot1b:chr17:55650353-55650662:-1, Pot1b:chr17:55651209-55651522:-1, Pot1b:chr17:55651908-55652309:-1	Pot1b	NA	NA	FALSE	FALSE	0.00486272	NA	FALSE
112	0.112999	NA	0.727273	0.4	0.327273	TRUE	1.38629	1 vs 2	0.654545	1 vs 2	0.454545	-0.2	Stxbp5:chr10:9757797-9758025:-1, Stxbp5:chr10:9759891-9760318:-1	Stxbp5	NA	NA	FALSE	FALSE	0.112999	NA	FALSE
113	0.0267757	NA	1	0.673469	0.326531	TRUE	Inf	1 vs 2	0.653061	1 vs 2	1	0.346939	Tsku:chr7:98350638-98351016:-1, Tsku:chr7:98351529-98351892:-1	Tsku	NA	NA	FALSE	FALSE	0.0267757	NA	FALSE
114	0.102398	NA	0.633333	0.307692	0.325641	TRUE	1.35747	2 vs 1	0.651282	2 vs 1	0.266667	-0.384615	Tbc1d8b:chrX:139753103-139753478:1, Tbc1d8b:chrX:139753838-139754236:1	Tbc1d8b	NA	NA	FALSE	FALSE	0.102398	NA	FALSE
115	0.212156	NA	0.70566	0.666667	0.0389937	TRUE	#NAME?	2 vs 1	0.65	4 vs 3	0.4	-0.25	Kif11:chr19:37420282-37420681:1, Kif11:chr19:37420758-37421287:1, Kif11:chr19:37421152-37421741:1, Kif11:chr19:37421501-37421866:1	Kif11	NA	NA	FALSE	FALSE	0.212156	NA	FALSE
116	0.0624452	NA	0.647059	0.322581	0.324478	TRUE	1.34807	1 vs 2	0.648956	1 vs 2	0.294118	-0.354839	Scd1:chr19:44394437-44394776:-1, Scd1:chr19:44397731-44398079:-1	Scd1	NA	NA	FALSE	FALSE	0.0624452	NA	FALSE
117	0.0439441	NA	1	0.675676	0.324324	TRUE	Inf	3 vs 1	0.648649	3 vs 1	1	0.351351	Cpeb4:chr11:31933657-31934009:1, Cpeb4:chr11:31935019-31935635:1, Cpeb4:chr11:31935312-31935616:1	Cpeb4	NA	NA	FALSE	FALSE	0.0439441	NA	FALSE
118	0.465125	NA	0.433036	0.125	0.308036	TRUE	Inf	1 vs 4	0.642857	1 vs 4	0.142857	-0.5	Agtrap:chr4:148077012-148077388:-1, Agtrap:chr4:148077310-148077773:-1, Agtrap:chr4:148077538-148077899:-1, Agtrap:chr4:148079882-148080278:-1, Agtrap:chr4:148080240-148080629:-1	Agtrap	NA	NA	FALSE	FALSE	0.465125	NA	FALSE
119	0.00936305	NA	0.55	0.228571	0.321429	TRUE	1.41707	1 vs 2	0.642857	1 vs 2	0.1	-0.542857	Tbc1d5:chr17:50733123-50733482:-1, Tbc1d5:chr17:50733868-50734287:-1	Tbc1d5	NA	NA	FALSE	FALSE	0.00936305	NA	FALSE
120	0.265322	NA	0.821429	0.516173	0.305256	TRUE	Inf	1 vs 3	0.641509	2 vs 5	0.5	-0.141509	Cnksr2:chrX:157821430-157821873:-1, Cnksr2:chrX:157821607-157821921:-1, Cnksr2:chrX:157821875-157822124:-1, Cnksr2:chrX:157823175-157823453:-1, Cnksr2:chrX:157832335-157832935:-1, Cnksr2:chrX:157832757-157832985:-1, Cnksr2:chrX:157832783-157833118:-1, Cnksr2:chrX:157832955-157833225:-1	Cnksr2	NA	NA	FALSE	FALSE	0.265322	NA	FALSE
121	0.137614	NA	0.9	0.583333	0.316667	TRUE	1.86075	2 vs 1	0.633333	2 vs 1	0.8	0.166667	D830030K20Rik:chr14:3233603-3234010:1, D830030K20Rik:chr14:3233897-3234562:1	D830030K20Rik	NA	NA	FALSE	FALSE	0.137614	NA	FALSE
122	0.510104	NA	0.566667	0.25	0.316667	TRUE	1.36688	1 vs 2	0.633333	1 vs 2	0.133333	-0.5	Tmem144:chr3:79812551-79812928:-1, Tmem144:chr3:79813153-79813477:-1	Tmem144	NA	NA	FALSE	FALSE	0.510104	NA	FALSE
123	0.364548	NA	0.381373	0.0666667	0.314706	TRUE	Inf	1 vs 4	0.632353	2 vs 6	-0.20098	-0.833333	Sall3:chr18:80966376-80966763:-1, Sall3:chr18:80966941-80967360:-1, Sall3:chr18:80967415-80967581:-1, Sall3:chr18:80968502-80968831:-1, Sall3:chr18:80968954-80969109:-1, Sall3:chr18:80969229-80969569:-1	Sall3	NA	NA	FALSE	FALSE	0.364548	NA	FALSE
124	1	NA	0.315789	0	0.315789	TRUE	Inf	1 vs 2	0.631579	1 vs 2	-0.368421	-1	St3gal6:chr16:58469687-58470147:-1, St3gal6:chr16:58470559-58470797:-1	St3gal6	NA	NA	FALSE	FALSE	1	NA	FALSE
125	0.0179581	NA	0.71	0.4	0.31	TRUE	2.0149	3 vs 1	0.62	3 vs 1	0.42	-0.2	Lrrc8c:chr5:105608270-105609025:1, Lrrc8c:chr5:105608635-105608953:1, Lrrc8c:chr5:105612656-105613018:1	Lrrc8c	NA	NA	FALSE	FALSE	0.0179581	NA	FALSE
126	0.436982	NA	0.909091	0.6	0.309091	TRUE	1.89712	2 vs 1	0.618182	2 vs 1	0.818182	0.2	Rora:chr9:69378750-69378994:1, Rora:chr9:69379441-69379796:1	Rora	NA	NA	FALSE	FALSE	0.436982	NA	FALSE
127	0.573946	NA	1	0.77193	0.22807	TRUE	Inf	3 vs 1	0.617544	3 vs 2	1	0.382456	Hs3st4:chr7:124397419-124397897:1, Hs3st4:chr7:124397799-124398236:1, Hs3st4:chr7:124398631-124398989:1	Hs3st4	NA	NA	FALSE	FALSE	0.573946	NA	FALSE
128	0.22544	NA	0.857143	0.548872	0.308271	TRUE	1.59564	1 vs 2	0.616541	1 vs 2	0.714286	0.0977444	Fgf18:chr11:33117081-33117465:-1, Fgf18:chr11:33117368-33117860:-1	Fgf18	NA	NA	FALSE	FALSE	0.22544	NA	FALSE
129	1	NA	1	0.695652	0.304348	TRUE	Inf	1 vs 2	0.608696	1 vs 2	1	0.391304	Prickle2:chr6:92370920-92371203:-1, Prickle2:chr6:92370886-92371394:-1	Prickle2	NA	NA	FALSE	FALSE	1	NA	FALSE
130	1.94756e-11	NA	0.552928	0.508772	0.044156	TRUE	#NAME?	1 vs 4	0.607752	6 vs 7	0.344595	-0.263158	Chpt1:chr10:88470795-88471167:-1, Chpt1:chr10:88472777-88473091:-1, Chpt1:chr10:88473679-88473962:-1, Chpt1:chr10:88473925-88474032:-1, Chpt1:chr10:88474904-88475729:-1, Chpt1:chr10:88475221-88475621:-1, Chpt1:chr10:88486856-88487457:-1	Chpt1	NA	NA	FALSE	FALSE	1.94756e-11	NA	FALSE
131	1	NA	0.303571	0	0.303571	TRUE	Inf	1 vs 2	0.607143	1 vs 2	-0.392857	-1	Sox8:chr17:25565931-25566253:-1, Sox8:chr17:25568692-25569080:-1	Sox8	NA	NA	FALSE	FALSE	1	NA	FALSE
132	0.0749533	NA	0.444444	0.307692	0.136752	TRUE	#NAME?	3 vs 1	0.605523	4 vs 3	0.333333	-0.272189	Unc79:chr12:103183566-103183809:1, Unc79:chr12:103183437-103183881:1, Unc79:chr12:103183714-103183998:1, Unc79:chr12:103183970-103184174:1	Unc79	NA	NA	FALSE	FALSE	0.0749533	NA	FALSE
133	0.746752	NA	1	0.697531	0.302469	TRUE	Inf	3 vs 1	0.604938	3 vs 1	1	0.395062	Usp29:chr7:6964122-6964670:1, Usp29:chr7:6966726-6967120:1, Usp29:chr7:6966922-6967206:1	Usp29	NA	NA	FALSE	FALSE	0.746752	NA	FALSE
134	0.246059	NA	0.625	0.322581	0.302419	TRUE	1.25276	1 vs 2	0.604839	1 vs 2	0.25	-0.354839	S1pr5:chr9:21242537-21242706:-1, S1pr5:chr9:21242769-21243461:-1	S1pr5	NA	NA	FALSE	FALSE	0.246059	NA	FALSE
135	0.020059	NA	0.534014	0.25	0.284014	TRUE	Inf	3 vs 1	0.602041	5 vs 1	0.102041	-0.5	Sox1:chr8:12397603-12397839:1, Sox1:chr8:12398824-12399171:1, Sox1:chr8:12398668-12399443:1, Sox1:chr8:12399081-12399529:1, Sox1:chr8:12399291-12399564:1	Sox1	NA	NA	FALSE	FALSE	0.020059	NA	FALSE
136	0.276453	0.499667	0.6	0.54	0.06	TRUE	1.55814	1 vs 2	0.6	1 vs 2	0	-0.6	Acer3:chr7:98216331-98216547:-1, Acer3:chr7:98216450-98216716:-1, Acer3:chr7:98216544-98216931:-1	Acer3	NA	NA	FALSE	FALSE	0.499667	NA	FALSE
137	0.552194	NA	0.443609	0.25	0.193609	TRUE	Inf	2 vs 1	0.597744	4 vs 3	0.0977444	-0.5	Knl1:chr2:119103594-119104546:1, Knl1:chr2:119104302-119104730:1, Knl1:chr2:119105100-119105443:1, Knl1:chr2:119106167-119106464:1, Knl1:chr2:119109232-119109659:1	Knl1	NA	NA	FALSE	FALSE	0.552194	NA	FALSE
138	0	0	0.848024	0.477131	0.370894	FALSE	3.10261	4 vs 5	0.597418	1 vs 6	0.644675	0.0472575	Cdc42:chr4:137319661-137320081:-1, Cdc42:chr4:137320051-137320697:-1, Cdc42:chr4:137320804-137321188:-1, Cdc42:chr4:137321071-137321232:-1, Cdc42:chr4:137321729-137322125:-1, Cdc42:chr4:137322444-137322692:-1	Cdc42	0	0	TRUE	TRUE	0	0	TRUE
139	0.107158	NA	0.708333	0.444444	0.263889	TRUE	#NAME?	1 vs 3	0.597222	1 vs 4	0.375	-0.222222	Prr11:chr11:87089152-87089564:-1, Prr11:chr11:87089415-87089737:-1, Prr11:chr11:87089622-87089965:-1, Prr11:chr11:87090687-87091872:-1	Prr11	NA	NA	FALSE	FALSE	0.107158	NA	FALSE
140	0.130556	NA	0.444444	0.36747	0.0769746	TRUE	#NAME?	3 vs 1	0.597055	2 vs 1	0.777778	0.180723	Klhdc8a:chr1:132304758-132305245:1, Klhdc8a:chr1:132305124-132305605:1, Klhdc8a:chr1:132305310-132305533:1	Klhdc8a	NA	NA	FALSE	FALSE	0.130556	NA	FALSE
141	0.799167	NA	1	0.703125	0.296875	TRUE	Inf	3 vs 1	0.59375	3 vs 1	1	0.40625	Wipf3:chr6:54500935-54501174:1, Wipf3:chr6:54501141-54501394:1, Wipf3:chr6:54503366-54503768:1	Wipf3	NA	NA	FALSE	FALSE	0.799167	NA	FALSE
142	9.28954e-65	8.2794e-61	0.647354	0.463887	0.183468	FALSE	1.81897	3 vs 2	0.59338	3 vs 2	0.0164234	-0.576956	Glud1:chr14:34343941-34344247:1, Glud1:chr14:34344514-34344949:1, Glud1:chr14:34345025-34345671:1	Glud1	1.68539e-62	1.82297e-58	TRUE	TRUE	8.2794e-61	1.91179e-58	TRUE
143	0.0598507	NA	0.75	0.640625	0.109375	TRUE	Inf	3 vs 1	0.592262	4 vs 2	0.833333	0.241071	Shank2:chr7:144423517-144423889:1, Shank2:chr7:144423721-144424025:1, Shank2:chr7:144423794-144424434:1, Shank2:chr7:144424166-144424483:1, Shank2:chr7:144425658-144426044:1	Shank2	NA	NA	FALSE	FALSE	0.0598507	NA	FALSE
144	0.297313	NA	0.571429	0.275862	0.295567	TRUE	1.25276	1 vs 2	0.591133	1 vs 2	0.142857	-0.448276	Rad9b:chr5:122323239-122323819:-1, Rad9b:chr5:122325491-122325815:-1	Rad9b	NA	NA	FALSE	FALSE	0.297313	NA	FALSE
145	0.652406	NA	0.666667	0.533333	0.133333	TRUE	Inf	2 vs 1	0.590909	4 vs 3	0.5	-0.0909091	Spink10:chr18:62660913-62661043:1, Spink10:chr18:62660924-62661279:1, Spink10:chr18:62661095-62661311:1, Spink10:chr18:62662582-62662867:1	Spink10	NA	NA	FALSE	FALSE	0.652406	NA	FALSE
146	0.0820671	NA	0.96	0.666667	0.293333	TRUE	2.48491	2 vs 1	0.586667	2 vs 1	0.92	0.333333	Slc35g1:chr19:38405176-38405422:1, Slc35g1:chr19:38405271-38405610:1	Slc35g1	NA	NA	FALSE	FALSE	0.0820671	NA	FALSE
147	0.153013	NA	0.692308	0.4	0.292308	TRUE	1.2164	1 vs 2	0.584615	1 vs 2	0.384615	-0.2	Zfp850:chr7:27987040-27987468:-1, Zfp850:chr7:27987253-27987598:-1	Zfp850	NA	NA	FALSE	FALSE	0.153013	NA	FALSE
148	7.9673e-20	6.53708e-10	0.566176	0.499473	0.0667039	TRUE	#NAME?	7 vs 1	0.584264	6 vs 5	0.0294118	-0.554852	Dusp4:chr8:34818544-34819269:1, Dusp4:chr8:34818853-34819116:1, Dusp4:chr8:34819237-34819912:1, Dusp4:chr8:34819537-34819925:1, Dusp4:chr8:34821549-34821985:1, Dusp4:chr8:34822318-34822505:1, Dusp4:chr8:34822183-34822564:1	Dusp4	NA	NA	FALSE	FALSE	6.53708e-10	NA	FALSE
149	0.852911	NA	0.666667	0.375	0.291667	TRUE	1.20397	1 vs 2	0.583333	1 vs 2	0.333333	-0.25	Cpxm2:chr7:132042830-132043133:-1, Cpxm2:chr7:132043804-132044130:-1	Cpxm2	NA	NA	FALSE	FALSE	0.852911	NA	FALSE
150	1	NA	0.290323	0	0.290323	TRUE	Inf	1 vs 2	0.580645	1 vs 2	-0.419355	-1	Gucy1b2:chr14:62392670-62393007:-1, Gucy1b2:chr14:62392916-62392978:-1	Gucy1b2	NA	NA	FALSE	FALSE	1	NA	FALSE
151	0.0906514	NA	0.727273	0.44	0.287273	TRUE	1.22199	2 vs 1	0.574545	2 vs 1	0.454545	-0.12	Stc1:chr14:69038464-69039144:1, Stc1:chr14:69040928-69041427:1	Stc1	NA	NA	FALSE	FALSE	0.0906514	NA	FALSE
152	0.0274188	NA	0.419118	0.279762	0.139356	TRUE	1.90954	3 vs 2	0.57423	3 vs 1	0.264706	-0.309524	Birc6:chr17:74702014-74702949:1, Birc6:chr17:74702680-74702924:1, Birc6:chr17:74702760-74703037:1, Birc6:chr17:74702818-74703345:1, Birc6:chr17:74703074-74703367:1	Birc6	NA	NA	FALSE	FALSE	0.0274188	NA	FALSE
153	0.0236674	NA	0.513228	0.380952	0.132275	TRUE	2.65676	2 vs 1	0.571429	2 vs 1	0.047619	-0.52381	Nemp1:chr10:127694541-127694807:1, Nemp1:chr10:127696504-127696904:1, Nemp1:chr10:127700626-127701032:1, Nemp1:chr10:127700728-127701056:1	Nemp1	NA	NA	FALSE	FALSE	0.0236674	NA	FALSE
154	6.92647e-44	1.75964e-45	0.686567	0.382372	0.304195	FALSE	3.97489	1 vs 7	0.569805	1 vs 7	0.231343	-0.338462	Tmod3:chr9:75497743-75498126:-1, Tmod3:chr9:75498036-75498547:-1, Tmod3:chr9:75498592-75499637:-1, Tmod3:chr9:75499356-75499648:-1, Tmod3:chr9:75499681-75499906:-1, Tmod3:chr9:75499588-75500172:-1, Tmod3:chr9:75520841-75521256:-1	Tmod3	5.86441e-42	2.36769e-43	TRUE	TRUE	6.92647e-44	8.79662e-42	TRUE
155	0.0121808	NA	0.98	0.695122	0.284878	TRUE	Inf	1 vs 3	0.569756	1 vs 3	0.96	0.390244	Rsbn1l:chr5:20892997-20893359:-1, Rsbn1l:chr5:20893091-20893557:-1, Rsbn1l:chr5:20895321-20895589:-1	Rsbn1l	NA	NA	FALSE	FALSE	0.0121808	NA	FALSE
156	0.814454	NA	0.153846	0	0.153846	TRUE	Inf	1 vs 3	0.569231	2 vs 3	-0.430769	-1	Sft2d2:chr1:165174207-165174854:-1, Sft2d2:chr1:165174337-165174657:-1, Sft2d2:chr1:165178660-165179046:-1	Sft2d2	NA	NA	FALSE	FALSE	0.814454	NA	FALSE
157	0.121194	NA	0.95122	0.666667	0.284553	TRUE	2.27727	2 vs 1	0.569106	2 vs 1	0.902439	0.333333	Rpp25:chr9:57504725-57505448:1, Rpp25:chr9:57505065-57505448:1	Rpp25	NA	NA	FALSE	FALSE	0.121194	NA	FALSE
158	6.8748e-49	9.85949e-46	0.562738	0.278761	0.283977	FALSE	1.2029	1 vs 2	0.567953	1 vs 2	0.125475	-0.442478	Pea15a:chr1:172196716-172197098:-1, Pea15a:chr1:172197423-172197813:-1	Pea15a	7.27583e-47	1.49248e-43	TRUE	TRUE	9.85949e-46	1.56519e-43	TRUE
159	1.36977e-10	1.04283e-08	0.546218	0.264523	0.281696	TRUE	1.40856	1 vs 3	0.563391	1 vs 3	0.092437	-0.470954	Fcho1:chr8:71704083-71704372:-1, Fcho1:chr8:71708329-71708806:-1, Fcho1:chr8:71708659-71708885:-1	Fcho1	NA	NA	FALSE	FALSE	1.04283e-08	NA	FALSE
160	2.56632e-13	2.7306e-14	0.920188	0.640884	0.279304	FALSE	1.8657	1 vs 2	0.558608	1 vs 2	0.840376	0.281768	Sgce:chr6:4674350-4674697:-1, Sgce:chr6:4677033-4677310:-1	Sgce	5.09255e-12	6.01229e-13	TRUE	TRUE	2.56632e-13	5.71795e-12	TRUE
161	0.00023539	0.000720387	0.666667	0.388298	0.278369	TRUE	1.40691	3 vs 1	0.556738	3 vs 1	0.333333	-0.223404	Ankrd40:chr11:94339550-94339956:1, Ankrd40:chr11:94340955-94341503:1, Ankrd40:chr11:94341460-94341857:1	Ankrd40	NA	NA	FALSE	FALSE	0.000720387	NA	FALSE
162	0.0575639	NA	0.903226	0.625	0.278226	TRUE	1.72277	1 vs 2	0.556452	1 vs 2	0.806452	0.25	Eme1:chr11:94644999-94645298:-1, Eme1:chr11:94644973-94645581:-1	Eme1	NA	NA	FALSE	FALSE	0.0575639	NA	FALSE
163	1	NA	1	0.722222	0.277778	TRUE	Inf	2 vs 1	0.555556	2 vs 1	1	0.444444	Pcdhb15:chr18:37475850-37476285:1, Pcdhb15:chr18:37476047-37476294:1	Pcdhb15	NA	NA	FALSE	FALSE	1	NA	FALSE
164	0.693816	NA	0.276923	0	0.276923	TRUE	Inf	1 vs 2	0.553846	1 vs 2	-0.446154	-1	Pask:chr1:93309427-93309814:-1, Pask:chr1:93309836-93310157:-1	Pask	NA	NA	FALSE	FALSE	0.693816	NA	FALSE
165	0.00250346	NA	0.892473	0.603333	0.28914	TRUE	Inf	2 vs 1	0.54871	4 vs 1	0.83871	0.29	Dip2c:chr13:9665942-9666528:1, Dip2c:chr13:9666401-9666903:1, Dip2c:chr13:9666464-9667030:1, Dip2c:chr13:9668566-9668917:1	Dip2c	NA	NA	FALSE	FALSE	0.00250346	NA	FALSE
166	0.439648	NA	0.666667	0.392857	0.27381	TRUE	1.12847	1 vs 2	0.547619	1 vs 2	0.333333	-0.214286	Stxbp5l:chr16:37103725-37104038:-1, Stxbp5l:chr16:37113030-37113414:-1	Stxbp5l	NA	NA	FALSE	FALSE	0.439648	NA	FALSE
167	0.814916	NA	0.5	0.393204	0.106796	TRUE	Inf	2 vs 1	0.543689	2 vs 1	1	0.456311	Ccser1:chr6:62380931-62381351:1, Ccser1:chr6:62382544-62382859:1, Ccser1:chr6:62382705-62382868:1	Ccser1	NA	NA	FALSE	FALSE	0.814916	NA	FALSE
168	0.233774	0.279488	0.642857	0.472222	0.170635	TRUE	1.72277	3 vs 2	0.539683	3 vs 2	0.428571	-0.111111	Bmp3:chr5:98879721-98880074:1, Bmp3:chr5:98883719-98884053:1, Bmp3:chr5:98886786-98887047:1	Bmp3	NA	NA	FALSE	FALSE	0.279488	NA	FALSE
169	0.585236	NA	0.75	0.480392	0.269608	TRUE	Inf	2 vs 1	0.539216	3 vs 1	0.5	-0.0392157	Klf8:chrX:153395487-153395755:1, Klf8:chrX:153395150-153396078:1, Klf8:chrX:153398575-153398928:1	Klf8	NA	NA	FALSE	FALSE	0.585236	NA	FALSE
170	2.78963e-08	NA	0.483544	0.126531	0.357014	TRUE	Inf	1 vs 3	0.537716	1 vs 6	-0.0949367	-0.632653	Nectin3:chr16:46387706-46387994:-1, Nectin3:chr16:46387706-46388240:-1, Nectin3:chr16:46394137-46394784:-1, Nectin3:chr16:46436140-46436473:-1, Nectin3:chr16:46447187-46447461:-1, Nectin3:chr16:46448101-46448402:-1	Nectin3	NA	NA	FALSE	FALSE	2.78963e-08	NA	FALSE
171	0.0116689	NA	0.552632	0.285714	0.266917	TRUE	1.1276	1 vs 2	0.533835	1 vs 2	0.105263	-0.428571	Zc3hav1l:chr6:38287394-38287799:-1, Zc3hav1l:chr6:38292394-38292858:-1	Zc3hav1l	NA	NA	FALSE	FALSE	0.0116689	NA	FALSE
172	0.212294	NA	0.666667	0.4	0.266667	TRUE	1.09861	1 vs 2	0.533333	1 vs 2	0.333333	-0.2	Tmem170:chr8:111862996-111863391:-1, Tmem170:chr8:111864681-111865413:-1	Tmem170	NA	NA	FALSE	FALSE	0.212294	NA	FALSE
173	0.406926	NA	0.5	0.4375	0.0625	TRUE	#NAME?	1 vs 2	0.53125	2 vs 3	1	0.46875	Chrnb2:chr3:89746235-89746519:-1, Chrnb2:chr3:89753428-89753777:-1, Chrnb2:chr3:89754744-89755109:-1	Chrnb2	NA	NA	FALSE	FALSE	0.406926	NA	FALSE
174	0.0222849	NA	0.686275	0.421053	0.265222	TRUE	1.10121	2 vs 1	0.530444	2 vs 1	0.372549	-0.157895	Srcap:chr7:127529076-127529287:1, Srcap:chr7:127560735-127561040:1	Srcap	NA	NA	FALSE	FALSE	0.0222849	NA	FALSE
175	0.149048	NA	0.542857	0.277778	0.265079	TRUE	1.29277	1 vs 3	0.530159	1 vs 3	0.0857143	-0.444444	Fndc3b:chr3:27416138-27416475:-1, Fndc3b:chr3:27416321-27416642:-1, Fndc3b:chr3:27417447-27417782:-1	Fndc3b	NA	NA	FALSE	FALSE	0.149048	NA	FALSE
176	0.348462	NA	0.627451	0.666667	-0.0392157	TRUE	#NAME?	3 vs 1	0.529412	4 vs 3	-0.470588	-1	Sp9:chr2:73274525-73275142:1, Sp9:chr2:73274980-73275247:1, Sp9:chr2:73275086-73275598:1, Sp9:chr2:73275452-73275764:1	Sp9	NA	NA	FALSE	FALSE	0.348462	NA	FALSE
177	0.0545022	NA	0.764706	0.529412	0.235294	TRUE	1.61991	1 vs 2	0.529412	1 vs 2	0.588235	0.0588235	Zfp974:chr7:27905413-27905738:-1, Zfp974:chr7:27906908-27907231:-1, Zfp974:chr7:27908626-27909116:-1	Zfp974	NA	NA	FALSE	FALSE	0.0545022	NA	FALSE
178	1	NA	1	0.736842	0.263158	TRUE	Inf	2 vs 1	0.526316	2 vs 1	1	0.473684	Htatip2:chr7:49773204-49773701:1, Htatip2:chr7:49773626-49774006:1	Htatip2	NA	NA	FALSE	FALSE	1	NA	FALSE
179	0.000670129	NA	0.790805	0.527778	0.263027	TRUE	1.21856	1 vs 2	0.526054	1 vs 2	0.581609	0.0555556	Nuf2:chr1:169498275-169498668:-1, Nuf2:chr1:169510145-169510399:-1	Nuf2	NA	NA	FALSE	FALSE	0.000670129	NA	FALSE
180	0.00467483	NA	0.862903	0.6	0.262903	TRUE	1.43415	2 vs 1	0.525806	2 vs 1	0.725806	0.2	Cgrrf1:chr14:46840107-46840398:1, Cgrrf1:chr14:46853828-46854214:1	Cgrrf1	NA	NA	FALSE	FALSE	0.00467483	NA	FALSE
181	0.234689	NA	0.484848	0.222222	0.262626	TRUE	1.70475	1 vs 3	0.525253	1 vs 3	-0.030303	-0.555556	Mast4:chr13:102732486-102732830:-1, Mast4:chr13:102734879-102735150:-1, Mast4:chr13:102852527-102852791:-1	Mast4	NA	NA	FALSE	FALSE	0.234689	NA	FALSE
182	0.539339	NA	0.833333	0.571429	0.261905	TRUE	1.32176	1 vs 2	0.52381	1 vs 2	0.666667	0.142857	Rab26:chr17:24527271-24527591:-1, Rab26:chr17:24529044-24529416:-1	Rab26	NA	NA	FALSE	FALSE	0.539339	NA	FALSE
183	7.92673e-08	8.32961e-07	0.611842	0.306641	0.305201	TRUE	Inf	2 vs 1	0.523163	5 vs 2	-0.0263158	-0.549479	Map6:chr7:99317408-99317883:1, Map6:chr7:99319780-99320365:1, Map6:chr7:99320046-99320375:1, Map6:chr7:99336514-99337137:1, Map6:chr7:99336781-99337137:1	Map6	NA	NA	FALSE	FALSE	8.32961e-07	NA	FALSE
184	0.169305	NA	0.416667	0.358974	0.0576923	TRUE	-1.38629	3 vs 2	0.519231	2 vs 1	0.416667	-0.102564	Vstm2b:chr7:40929395-40930031:1, Vstm2b:chr7:40929673-40929918:1, Vstm2b:chr7:40929771-40930033:1	Vstm2b	NA	NA	FALSE	FALSE	0.169305	NA	FALSE
185	0.00816418	NA	0.285714	0.028169	0.257545	TRUE	2.62467	1 vs 2	0.515091	1 vs 2	-0.428571	-0.943662	Kcna1:chr6:126636854-126636963:-1, Kcna1:chr6:126641648-126642047:-1	Kcna1	NA	NA	FALSE	FALSE	0.00816418	NA	FALSE
186	0.264243	NA	0.533333	0.245	0.288333	TRUE	Inf	1 vs 2	0.514286	1 vs 6	0	-0.514286	Lrrtm3:chr10:63928471-63928825:-1, Lrrtm3:chr10:63928603-63928983:-1, Lrrtm3:chr10:63929282-63929517:-1, Lrrtm3:chr10:63929641-63929958:-1, Lrrtm3:chr10:63930046-63930307:-1, Lrrtm3:chr10:63929839-63930202:-1	Lrrtm3	NA	NA	FALSE	FALSE	0.264243	NA	FALSE
187	0.735317	NA	0.4	0.142857	0.257143	TRUE	1.38629	1 vs 2	0.514286	1 vs 2	-0.2	-0.714286	Nfatc2:chr2:168476410-168476706:-1, Nfatc2:chr2:168519056-168519483:-1	Nfatc2	NA	NA	FALSE	FALSE	0.735317	NA	FALSE
188	0.74256	NA	1	0.74359	0.25641	TRUE	Inf	1 vs 2	0.512821	1 vs 2	1	0.487179	Slc8a3:chr12:81197911-81198238:-1, Slc8a3:chr12:81197911-81198455:-1	Slc8a3	NA	NA	FALSE	FALSE	0.74256	NA	FALSE
189	0.141962	NA	0.470588	0.214286	0.256303	TRUE	1.1815	1 vs 2	0.512605	1 vs 2	-0.0588235	-0.571429	Amot:chrX:145446466-145446608:-1, Amot:chrX:145446454-145446821:-1	Amot	NA	NA	FALSE	FALSE	0.141962	NA	FALSE
190	0.286149	NA	0.632927	0.444444	0.188482	TRUE	#NAME?	1 vs 4	0.511518	1 vs 5	0.0670732	-0.444444	Nek7:chr1:138484071-138484498:-1, Nek7:chr1:138484570-138485515:-1, Nek7:chr1:138484976-138485208:-1, Nek7:chr1:138486097-138486424:-1, Nek7:chr1:138486009-138486288:-1, Nek7:chr1:138485560-138486669:-1	Nek7	NA	NA	FALSE	FALSE	0.286149	NA	FALSE
191	7.79442e-07	1.93817e-07	0.441558	0.444444	-0.002886	TRUE	-1.77542	4 vs 3	0.511496	3 vs 2	0.207792	-0.303704	Dnajb14:chr3:137908295-137908538:1, Dnajb14:chr3:137908323-137909018:1, Dnajb14:chr3:137914007-137914171:1, Dnajb14:chr3:137914887-137915270:1, Dnajb14:chr3:137916262-137916557:1	Dnajb14	NA	NA	FALSE	FALSE	7.79442e-07	NA	FALSE
192	0.0532297	NA	0.5	0.409091	0.0909091	TRUE	1.39872	2 vs 1	0.50974	2 vs 1	0.464286	-0.0454545	Zfp758:chr17:22376522-22377108:1, Zfp758:chr17:22376906-22377276:1, Zfp758:chr17:22378337-22378704:1	Zfp758	NA	NA	FALSE	FALSE	0.0532297	NA	FALSE
193	1.11988e-11	8.81634e-11	0.409309	0.238276	0.171032	FALSE	1.23413	2 vs 4	0.509443	2 vs 4	0.178645	-0.330798	Asrgl1:chr19:9109868-9110239:-1, Asrgl1:chr19:9112014-9112391:-1, Asrgl1:chr19:9112628-9113074:-1, Asrgl1:chr19:9112897-9113266:-1	Asrgl1	1.97534e-10	1.61767e-09	TRUE	TRUE	8.81634e-11	1.70943e-09	TRUE
194	0.563696	NA	0.441038	0.25	0.191038	TRUE	Inf	1 vs 2	0.509434	2 vs 3	0.509434	0	Esco2:chr14:65818388-65818915:-1, Esco2:chr14:65819051-65819344:-1, Esco2:chr14:65818952-65819581:-1	Esco2	NA	NA	FALSE	FALSE	0.563696	NA	FALSE
195	0.0180514	NA	0.866667	0.612069	0.254598	TRUE	1.8902	1 vs 3	0.509195	1 vs 3	0.733333	0.224138	Fcho2:chr13:98723391-98723782:-1, Fcho2:chr13:98723649-98724090:-1, Fcho2:chr13:98724845-98725172:-1	Fcho2	NA	NA	FALSE	FALSE	0.0180514	NA	FALSE
196	0.00374405	NA	0.789474	0.535714	0.253759	TRUE	1.17865	2 vs 1	0.507519	2 vs 1	0.578947	0.0714286	Phlpp2:chr8:109942479-109942821:1, Phlpp2:chr8:109944243-109944671:1	Phlpp2	NA	NA	FALSE	FALSE	0.00374405	NA	FALSE
197	0.00950192	NA	0.77551	0.522388	0.253122	TRUE	1.15008	1 vs 2	0.506244	1 vs 2	0.55102	0.0447761	Ranbp10:chr8:105768308-105768638:-1, Ranbp10:chr8:105771157-105771503:-1	Ranbp10	NA	NA	FALSE	FALSE	0.00950192	NA	FALSE
198	6.75667e-07	5.18445e-05	0.664815	0.451111	0.213704	TRUE	-1.8718	4 vs 3	0.505556	6 vs 1	0.324074	-0.181481	Alg13:chrX:144323957-144324169:1, Alg13:chrX:144323734-144324779:1, Alg13:chrX:144324459-144324741:1, Alg13:chrX:144324683-144325057:1, Alg13:chrX:144324844-144325206:1, Alg13:chrX:144374005-144374492:1	Alg13	NA	NA	FALSE	FALSE	5.18445e-05	NA	FALSE
199	0.649706	NA	0.75	0.592437	0.157563	TRUE	Inf	2 vs 1	0.504202	3 vs 2	0	-0.504202	Jph3:chr8:121790202-121790746:1, Jph3:chr8:121790476-121790842:1, Jph3:chr8:121790683-121791083:1	Jph3	NA	NA	FALSE	FALSE	0.649706	NA	FALSE
200	1	NA	1	0.75	0.25	TRUE	Inf	2 vs 1	0.5	2 vs 1	1	0.5	6430571L13Rik:chr9:107349145-107349645:1, 6430571L13Rik:chr9:107349378-107349706:1	6430571L13Rik	NA	NA	FALSE	FALSE	1	NA	FALSE
201	0.52189	NA	0.583333	0.333333	0.25	TRUE	1.02962	2 vs 1	0.5	2 vs 1	0.166667	-0.333333	Cntln:chr4:85130837-85131384:1, Cntln:chr4:85131620-85131892:1	Cntln	NA	NA	FALSE	FALSE	0.52189	NA	FALSE
202	1	NA	0.625	0.5	0.125	TRUE	Inf	3 vs 2	0.5	3 vs 2	-0.5	-1	Col1a2:chr6:4540461-4540701:1, Col1a2:chr6:4540609-4541021:1, Col1a2:chr6:4541101-4541544:1	Col1a2	NA	NA	FALSE	FALSE	1	NA	FALSE
203	0.670544	NA	0.25	0	0.25	TRUE	Inf	1 vs 3	0.5	1 vs 3	-0.5	-1	Hacd4:chr4:88410330-88410662:-1, Hacd4:chr4:88413804-88414511:-1, Hacd4:chr4:88414241-88414382:-1	Hacd4	NA	NA	FALSE	FALSE	0.670544	NA	FALSE
204	1	NA	1	0.75	0.25	TRUE	Inf	2 vs 1	0.5	2 vs 1	1	0.5	Mical2:chr7:112412777-112412894:1, Mical2:chr7:112412791-112413098:1	Mical2	NA	NA	FALSE	FALSE	1	NA	FALSE
205	0.117323	NA	0.666667	0.642857	0.0238095	TRUE	Inf	1 vs 2	0.5	3 vs 4	0.5	0	Scube1:chr15:83602583-83602888:-1, Scube1:chr15:83602592-83603131:-1, Scube1:chr15:83603381-83603706:-1, Scube1:chr15:83604979-83605363:-1	Scube1	NA	NA	FALSE	FALSE	0.117323	NA	FALSE
206	1	NA	0.25	0	0.25	TRUE	Inf	3 vs 1	0.5	3 vs 1	-0.5	-1	Sulf1:chr1:12859937-12860458:1, Sulf1:chr1:12860553-12860924:1, Sulf1:chr1:12860816-12861196:1	Sulf1	NA	NA	FALSE	FALSE	1	NA	FALSE
207	1	NA	0.75	0.5	0.25	TRUE	1.09861	2 vs 1	0.5	2 vs 1	0.5	0	Wnt10a:chr1:74803621-74804179:1, Wnt10a:chr1:74803852-74804179:1	Wnt10a	NA	NA	FALSE	FALSE	1	NA	FALSE
208	0.00228199	0.00851648	0.386364	0.244361	0.142003	TRUE	1.1127	2 vs 1	0.498291	2 vs 1	0.272727	-0.225564	Emc1:chr4:139375575-139375925:1, Emc1:chr4:139377217-139377485:1, Emc1:chr4:139378339-139378735:1	Emc1	NA	NA	FALSE	FALSE	0.00851648	NA	FALSE
209	0.251732	NA	0.5625	0.411111	0.151389	TRUE	Inf	2 vs 1	0.497222	2 vs 1	0.875	0.377778	Zfp273:chr13:67826448-67826757:1, Zfp273:chr13:67826737-67826935:1, Zfp273:chr13:67827179-67827353:1	Zfp273	NA	NA	FALSE	FALSE	0.251732	NA	FALSE
210	0.0107547	NA	0.638889	0.489796	0.149093	TRUE	2.20374	3 vs 2	0.494331	3 vs 2	0.555556	0.0612245	Ccdc93:chr1:121501165-121501662:1, Ccdc93:chr1:121505961-121506497:1, Ccdc93:chr1:121506178-121506432:1	Ccdc93	NA	NA	FALSE	FALSE	0.0107547	NA	FALSE
211	0.0914571	NA	0.784884	0.538462	0.246422	TRUE	1.14021	1 vs 2	0.492844	1 vs 2	0.569767	0.0769231	Rad51ap1:chr6:126923378-126923808:-1, Rad51ap1:chr6:126923548-126924074:-1	Rad51ap1	NA	NA	FALSE	FALSE	0.0914571	NA	FALSE
212	0.00303948	NA	0.634615	0.389831	0.244785	TRUE	1.00009	1 vs 2	0.48957	1 vs 2	0.269231	-0.220339	Leng9:chr7:4147878-4148278:-1, Leng9:chr7:4148122-4148547:-1	Leng9	NA	NA	FALSE	FALSE	0.00303948	NA	FALSE
213	0.749119	0.55133	0.909091	0.666667	0.242424	TRUE	1.60944	1 vs 2	0.484848	1 vs 2	0.818182	0.333333	Zcchc24:chr14:25711642-25711982:-1, Zcchc24:chr14:25711642-25712253:-1	Zcchc24	NA	NA	FALSE	FALSE	0.749119	NA	FALSE
214	0.497732	NA	0.707317	0.5	0.207317	TRUE	1.40877	1 vs 3	0.481707	1 vs 2	0.231707	-0.25	Chek1:chr9:36709436-36709722:-1, Chek1:chr9:36709556-36709934:-1, Chek1:chr9:36709646-36710225:-1	Chek1	NA	NA	FALSE	FALSE	0.497732	NA	FALSE
215	6.02225e-20	1.58864e-11	0.668122	0.538931	0.129191	TRUE	1.90587	5 vs 4	0.480296	5 vs 4	0.231441	-0.248855	Eid2b:chr7:28277960-28278391:1, Eid2b:chr7:28278345-28278540:1, Eid2b:chr7:28278569-28279004:1, Eid2b:chr7:28279099-28279508:1, Eid2b:chr7:28282248-28282413:1	Eid2b	NA	NA	FALSE	FALSE	1.58864e-11	NA	FALSE
216	0.0189927	NA	0.837209	0.688172	0.149037	TRUE	1.10787	1 vs 2	0.477619	1 vs 2	0.488372	0.0107527	Zfp141:chr7:42473349-42473748:-1, Zfp141:chr7:42473632-42474198:-1, Zfp141:chr7:42474648-42474790:-1	Zfp141	NA	NA	FALSE	FALSE	0.0189927	NA	FALSE
217	0.0426792	NA	0.346154	0.220588	0.125566	TRUE	1.04351	2 vs 1	0.47681	2 vs 1	0.182692	-0.294118	Mcm8:chr2:132843454-132843542:1, Mcm8:chr2:132843475-132843896:1, Mcm8:chr2:132843814-132844197:1	Mcm8	NA	NA	FALSE	FALSE	0.0426792	NA	FALSE
218	1.80459e-08	0.0381026	0.284483	0.282227	0.0022562	TRUE	-2.03065	5 vs 2	0.476338	2 vs 1	0.0114943	-0.464844	Cldn34c1:chrX:123142911-123143344:1, Cldn34c1:chrX:123143256-123143617:1, Cldn34c1:chrX:123144408-123144826:1, Cldn34c1:chrX:123145084-123145552:1, Cldn34c1:chrX:123145381-123145581:1	Cldn34c1	NA	NA	FALSE	FALSE	0.0381026	NA	FALSE
219	0.609034	NA	0.444444	0.506591	-0.0621469	TRUE	#NAME?	1 vs 2	0.474576	2 vs 3	0.666667	0.19209	Pde1a:chr2:79834452-79834747:-1, Pde1a:chr2:79836527-79836908:-1, Pde1a:chr2:79838893-79839049:-1, Pde1a:chr2:79859044-79859304:-1	Pde1a	NA	NA	FALSE	FALSE	0.609034	NA	FALSE
220	0.315603	NA	0.901961	0.666667	0.235294	TRUE	1.52606	2 vs 1	0.470588	2 vs 1	0.803922	0.333333	Sp5:chr2:70477061-70477841:1, Sp5:chr2:70477378-70477734:1	Sp5	NA	NA	FALSE	FALSE	0.315603	NA	FALSE
221	0.0844541	0.202436	0.7625	0.529412	0.233088	TRUE	#NAME?	1 vs 2	0.466176	1 vs 3	0.525	0.0588235	Net1:chr13:3882521-3882936:-1, Net1:chr13:3882543-3883190:-1, Net1:chr13:3917307-3917617:-1	Net1	NA	NA	FALSE	FALSE	0.202436	NA	FALSE
222	2.11524e-11	9.37531e-08	0.501873	0.418425	0.0834479	FALSE	-1.31742	4 vs 3	0.463163	3 vs 1	0.191011	-0.272152	Ctnnd2:chr15:31027832-31028451:1, Ctnnd2:chr15:31028085-31028331:1, Ctnnd2:chr15:31028275-31028639:1, Ctnnd2:chr15:31028945-31029343:1	Ctnnd2	3.60585e-10	1.14682e-06	TRUE	TRUE	9.37531e-08	1.22749e-06	TRUE
223	0.282746	0.472106	0.5	0.4	0.1	TRUE	1.67398	1 vs 2	0.463158	1 vs 2	0.263158	-0.2	Eaf2:chr16:36793957-36794070:-1, Eaf2:chr16:36793738-36793987:-1, Eaf2:chr16:36800540-36800675:-1	Eaf2	NA	NA	FALSE	FALSE	0.472106	NA	FALSE
224	0.53835	NA	0.564103	0.333333	0.230769	TRUE	0.950976	1 vs 2	0.461538	1 vs 2	0.128205	-0.333333	Ctnnal1:chr4:56810900-56811283:-1, Ctnnal1:chr4:56811462-56811849:-1	Ctnnal1	NA	NA	FALSE	FALSE	0.53835	NA	FALSE
225	0.574849	NA	0.698507	0.45	0.248507	TRUE	#NAME?	1 vs 2	0.458955	1 vs 5	0.208955	-0.25	Phactr2:chr10:13207702-13208098:-1, Phactr2:chr10:13213359-13213748:-1, Phactr2:chr10:13213510-13214081:-1, Phactr2:chr10:13213559-13213938:-1, Phactr2:chr10:13213837-13214172:-1, Phactr2:chr10:13214040-13214174:-1	Phactr2	NA	NA	FALSE	FALSE	0.574849	NA	FALSE
226	0.204527	0.304739	0.840278	0.611111	0.229167	TRUE	1.35239	3 vs 1	0.458333	3 vs 1	0.680556	0.222222	Etfbkmt:chr6:149144753-149145168:1, Etfbkmt:chr6:149150520-149151171:1, Etfbkmt:chr6:149150800-149151171:1	Etfbkmt	NA	NA	FALSE	FALSE	0.304739	NA	FALSE
227	0.37354	NA	0.5	0.270833	0.229167	TRUE	0.990399	1 vs 2	0.458333	1 vs 2	0	-0.458333	Iba57:chr11:59155372-59155661:-1, Iba57:chr11:59157445-59157698:-1	Iba57	NA	NA	FALSE	FALSE	0.37354	NA	FALSE
228	0.102435	NA	0.823529	0.596386	0.227144	TRUE	1.36098	3 vs 1	0.454288	3 vs 1	0.647059	0.192771	Zfp398:chr6:47866679-47867066:1, Zfp398:chr6:47866908-47867770:1, Zfp398:chr6:47873169-47873562:1	Zfp398	NA	NA	FALSE	FALSE	0.102435	NA	FALSE
229	0.00206608	NA	0.452586	0.358051	0.0945354	TRUE	1.87607	3 vs 5	0.452659	3 vs 5	0.206897	-0.245763	Uba6:chr5:86107708-86108039:-1, Uba6:chr5:86108407-86108664:-1, Uba6:chr5:86109199-86109663:-1, Uba6:chr5:86110265-86110538:-1, Uba6:chr5:86112320-86112729:-1	Uba6	NA	NA	FALSE	FALSE	0.00206608	NA	FALSE
230	0.0121031	0.0598279	0.473333	0.333333	0.14	TRUE	1.24171	3 vs 1	0.45	2 vs 1	0.533333	0.0833333	Tbl2:chr5:135159500-135159824:1, Tbl2:chr5:135162327-135162665:1, Tbl2:chr5:135164275-135164484:1	Tbl2	NA	NA	FALSE	FALSE	0.0598279	NA	FALSE
231	0.202031	NA	0.807692	0.583333	0.224359	TRUE	1.09861	2 vs 1	0.448718	2 vs 1	0.615385	0.166667	Swap70:chr7:110282154-110282511:1, Swap70:chr7:110283039-110283498:1	Swap70	NA	NA	FALSE	FALSE	0.202031	NA	FALSE
232	0.59359	NA	0.666667	0.444444	0.222222	TRUE	0.916291	1 vs 2	0.444444	1 vs 2	0.333333	-0.111111	Tmem88:chr11:69396516-69396876:-1, Tmem88:chr11:69397214-69397559:-1	Tmem88	NA	NA	FALSE	FALSE	0.59359	NA	FALSE
233	0.0185653	NA	0.890625	0.809091	0.0815341	TRUE	-2.70805	2 vs 3	0.44375	1 vs 2	0.84375	0.4	Mcu:chr10:59446984-59447307:-1, Mcu:chr10:59448333-59448784:-1, Mcu:chr10:59448701-59448950:-1	Mcu	NA	NA	FALSE	FALSE	0.0185653	NA	FALSE
234	0.088168	NA	0.688596	0.611111	0.0774854	TRUE	#NAME?	1 vs 4	0.442982	1 vs 3	0.276316	-0.166667	Lrrc1:chr9:77430819-77431187:-1, Lrrc1:chr9:77430993-77431202:-1, Lrrc1:chr9:77431037-77431325:-1, Lrrc1:chr9:77431139-77431463:-1	Lrrc1	NA	NA	FALSE	FALSE	0.088168	NA	FALSE
235	0.134325	NA	0.6	0.627976	-0.0279762	TRUE	Inf	1 vs 3	0.442857	2 vs 3	0.466667	0.0238095	Dgke:chr11:89035179-89035573:-1, Dgke:chr11:89037732-89038029:-1, Dgke:chr11:89037895-89038447:-1, Dgke:chr11:89037932-89038617:-1, Dgke:chr11:89039681-89039992:-1	Dgke	NA	NA	FALSE	FALSE	0.134325	NA	FALSE
236	3.56641e-25	8.49577e-23	0.524709	0.310597	0.214112	FALSE	1.7682	3 vs 2	0.441765	3 vs 2	0.328488	-0.113276	Rbbp6:chr7:122978633-122979031:1, Rbbp6:chr7:122979786-122980224:1, Rbbp6:chr7:123002137-123002611:1	Rbbp6	1.35204e-23	3.21512e-21	TRUE	TRUE	8.49577e-23	3.37176e-21	TRUE
237	0.12546	NA	0.894737	0.673913	0.220824	TRUE	1.41413	1 vs 2	0.441648	1 vs 2	0.789474	0.347826	Dgkq:chr5:108646964-108647408:-1, Dgkq:chr5:108647619-108647951:-1	Dgkq	NA	NA	FALSE	FALSE	0.12546	NA	FALSE
238	0.571491	NA	0.675676	0.666667	0.00900901	TRUE	#NAME?	1 vs 3	0.441441	1 vs 2	0.108108	-0.333333	Eya4:chr10:23102962-23103283:-1, Eya4:chr10:23103669-23103969:-1, Eya4:chr10:23105451-23105727:-1	Eya4	NA	NA	FALSE	FALSE	0.571491	NA	FALSE
239	0.227574	NA	0.705128	0.633333	0.0717949	TRUE	#NAME?	1 vs 3	0.441026	1 vs 2	-0.025641	-0.466667	Jph1:chr1:16994920-16995256:-1, Jph1:chr1:16995051-16995381:-1, Jph1:chr1:16995250-16995447:-1	Jph1	NA	NA	FALSE	FALSE	0.227574	NA	FALSE
240	7.59198e-74	2.79356e-34	0.437943	0.232778	0.205165	FALSE	3.16336	4 vs 3	0.438723	4 vs 1	-0.12766	-0.566382	Rufy3:chr5:88640553-88640954:1, Rufy3:chr5:88641240-88641635:1, Rufy3:chr5:88642309-88642735:1, Rufy3:chr5:88651011-88651418:1	Rufy3	1.60697e-71	1.82865e-32	TRUE	TRUE	2.79356e-34	1.91774e-32	TRUE
241	0.0491317	NA	0.641509	0.422222	0.219287	TRUE	0.895579	1 vs 2	0.438574	1 vs 2	0.283019	-0.155556	Prrc2c:chr1:162671750-162672130:-1, Prrc2c:chr1:162673554-162673705:-1	Prrc2c	NA	NA	FALSE	FALSE	0.0491317	NA	FALSE
242	0.0495272	NA	0.896552	0.677966	0.218586	TRUE	1.41504	2 vs 1	0.437171	2 vs 1	0.793103	0.355932	Eif2ak4:chr2:118427893-118428182:1, Eif2ak4:chr2:118474926-118475197:1	Eif2ak4	NA	NA	FALSE	FALSE	0.0495272	NA	FALSE
243	0.119066	NA	0.785714	0.568966	0.216749	TRUE	1.29928	1 vs 3	0.433498	1 vs 3	0.571429	0.137931	Bicral:chr17:46798126-46798416:-1, Bicral:chr17:46798184-46798625:-1, Bicral:chr17:46798262-46798689:-1	Bicral	NA	NA	FALSE	FALSE	0.119066	NA	FALSE
244	3.46516e-05	0.000112777	0.612069	0.395712	0.216357	FALSE	0.879384	1 vs 2	0.432715	1 vs 2	0.224138	-0.208577	Zfp251:chr15:76851528-76852006:-1, Zfp251:chr15:76852122-76852526:-1	Zfp251	0.000245852	0.000782656	TRUE	TRUE	0.000112777	0.000840043	TRUE
245	0.0121542	0.0186474	0.605364	0.361111	0.244253	TRUE	1.76359	4 vs 1	0.431034	4 vs 1	0.264368	-0.166667	Intu:chr3:40653928-40654829:1, Intu:chr3:40654280-40654670:1, Intu:chr3:40701206-40701677:1, Intu:chr3:40704436-40704779:1	Intu	NA	NA	FALSE	FALSE	0.0186474	NA	FALSE
246	0.0855004	NA	0.438889	0.421053	0.0178363	TRUE	1.41084	2 vs 1	0.430702	2 vs 1	0.483333	0.0526316	Cip2a:chr16:49018573-49019410:1, Cip2a:chr16:49018920-49019260:1, Cip2a:chr16:49019237-49019524:1, Cip2a:chr16:49019354-49019709:1	Cip2a	NA	NA	FALSE	FALSE	0.0855004	NA	FALSE
247	0.826565	NA	0.214286	0	0.214286	TRUE	Inf	2 vs 1	0.428571	2 vs 1	-0.571429	-1	Efcc1:chr6:87755564-87755946:1, Efcc1:chr6:87757136-87757281:1, Efcc1:chr6:87757174-87757706:1	Efcc1	NA	NA	FALSE	FALSE	0.826565	NA	FALSE
248	0.305507	NA	0.785714	0.571429	0.214286	TRUE	1.0116	1 vs 2	0.428571	1 vs 2	0.571429	0.142857	Sh2b3:chr5:121815435-121815871:-1, Sh2b3:chr5:121817197-121817689:-1	Sh2b3	NA	NA	FALSE	FALSE	0.305507	NA	FALSE
249	2.13286e-05	0.0304041	0.843902	0.631148	0.212755	TRUE	1.15041	1 vs 2	0.42551	1 vs 2	0.687805	0.262295	Fam120a:chr13:48879216-48879572:-1, Fam120a:chr13:48880587-48880913:-1	Fam120a	NA	NA	FALSE	FALSE	0.0304041	NA	FALSE
250	0.0246992	NA	0.693694	0.514493	0.179201	TRUE	Inf	2 vs 1	0.421857	4 vs 1	0.378378	-0.0434783	Alg11:chr8:22067816-22068549:1, Alg11:chr8:22068445-22068587:1, Alg11:chr8:22071079-22071623:1, Alg11:chr8:22071310-22071599:1	Alg11	NA	NA	FALSE	FALSE	0.0246992	NA	FALSE
251	0.215437	NA	0.416667	0.22807	0.188596	TRUE	1.60944	1 vs 4	0.421053	1 vs 4	0	-0.421053	Pdlim5:chr3:142239835-142240054:-1, Pdlim5:chr3:142242164-142242577:-1, Pdlim5:chr3:142242578-142242983:-1, Pdlim5:chr3:142302790-142303090:-1	Pdlim5	NA	NA	FALSE	FALSE	0.215437	NA	FALSE
252	0.0928198	NA	0.752381	0.543478	0.208903	TRUE	1.09406	1 vs 3	0.417805	1 vs 3	0.504762	0.0869565	Grik2:chr10:49099537-49099913:-1, Grik2:chr10:49099594-49100271:-1, Grik2:chr10:49100941-49101326:-1	Grik2	NA	NA	FALSE	FALSE	0.0928198	NA	FALSE
253	0.101251	NA	1	0.791822	0.208178	TRUE	Inf	2 vs 1	0.416357	2 vs 1	1	0.583643	Ackr3:chr1:90215102-90215769:1, Ackr3:chr1:90215411-90215712:1	Ackr3	NA	NA	FALSE	FALSE	0.101251	NA	FALSE
254	5.13187e-09	0.000933612	0.488095	0.476069	0.012026	TRUE	3.45456	5 vs 4	0.415624	5 vs 4	0.0714286	-0.344196	Ak1:chr2:32633516-32633849:1, Ak1:chr2:32633805-32634346:1, Ak1:chr2:32634419-32635089:1, Ak1:chr2:32634721-32635068:1, Ak1:chr2:32638703-32638898:1	Ak1	NA	NA	FALSE	FALSE	0.000933612	NA	FALSE
255	9.95615e-09	2.38782e-08	0.830556	0.622754	0.207801	FALSE	1.32404	1 vs 3	0.415602	1 vs 3	0.661111	0.245509	Pcid2:chr8:13077146-13077547:-1, Pcid2:chr8:13077437-13077895:-1, Pcid2:chr8:13077735-13078259:-1	Pcid2	1.2772e-07	3.28597e-07	TRUE	TRUE	2.38782e-08	3.48567e-07	TRUE
256	0.151283	NA	0.636364	0.428571	0.207792	TRUE	2.30259	1 vs 3	0.415584	1 vs 3	0.272727	-0.142857	Gm49394:chr7:142650764-142651106:-1, Gm49394:chr7:142653411-142653962:-1, Gm49394:chr7:142653364-142654115:-1	Gm49394	NA	NA	FALSE	FALSE	0.151283	NA	FALSE
257	0.151283	NA	0.636364	0.428571	0.207792	TRUE	2.30259	1 vs 3	0.415584	1 vs 3	0.272727	-0.142857	Igf2:chr7:142650764-142651107:-1, Igf2:chr7:142653410-142653962:-1, Igf2:chr7:142653366-142654114:-1	Igf2	NA	NA	FALSE	FALSE	0.151283	NA	FALSE
258	0.12497	NA	0.862069	0.655172	0.206897	TRUE	1.19073	2 vs 1	0.413793	2 vs 1	0.724138	0.310345	Ppfibp1:chr6:147030796-147031214:1, Ppfibp1:chr6:147031689-147032025:1	Ppfibp1	NA	NA	FALSE	FALSE	0.12497	NA	FALSE
259	0.410908	NA	0.7	0.688312	0.0116883	TRUE	-1.79176	2 vs 1	0.412987	3 vs 2	0.4	-0.012987	Cbln2:chr18:86717126-86717432:1, Cbln2:chr18:86717281-86717577:1, Cbln2:chr18:86717967-86718298:1	Cbln2	NA	NA	FALSE	FALSE	0.410908	NA	FALSE
260	0.403778	NA	0.6	0.59375	0.00625	TRUE	Inf	1 vs 2	0.4125	1 vs 2	0.6	0.1875	Sik1:chr17:31844477-31844739:-1, Sik1:chr17:31845294-31845708:-1, Sik1:chr17:31845938-31846438:-1	Sik1	NA	NA	FALSE	FALSE	0.403778	NA	FALSE
261	0.0195163	NA	0.851852	0.646154	0.205698	TRUE	1.14702	2 vs 1	0.411396	2 vs 1	0.703704	0.292308	Ak4:chr4:101464208-101464561:1, Ak4:chr4:101466646-101467010:1	Ak4	NA	NA	FALSE	FALSE	0.0195163	NA	FALSE
262	0.0120581	NA	0.65812	0.5	0.15812	TRUE	#NAME?	2 vs 1	0.410256	3 vs 2	0.410256	0	Ripk1:chr13:34032666-34033008:1, Ripk1:chr13:34033088-34033797:1, Ripk1:chr13:34033334-34033683:1, Ripk1:chr13:34034773-34035190:1	Ripk1	NA	NA	FALSE	FALSE	0.0120581	NA	FALSE
263	0.375491	0.394674	0.666667	0.4618	0.204867	TRUE	0.846247	1 vs 2	0.409734	1 vs 2	0.333333	-0.0764007	Cygb:chr11:116645562-116645938:-1, Cygb:chr11:116646118-116646509:-1	Cygb	NA	NA	FALSE	FALSE	0.394674	NA	FALSE
264	0.432533	NA	1	0.795455	0.204545	TRUE	Inf	2 vs 1	0.409091	2 vs 1	1	0.590909	Rgs8:chr1:153692760-153693040:1, Rgs8:chr1:153697329-153697685:1	Rgs8	NA	NA	FALSE	FALSE	0.432533	NA	FALSE
265	0.0738176	NA	0.766667	0.5625	0.204167	TRUE	0.93827	2 vs 1	0.408333	2 vs 1	0.533333	0.125	Ehd3:chr17:73830696-73831069:1, Ehd3:chr17:73831732-73832107:1	Ehd3	NA	NA	FALSE	FALSE	0.0738176	NA	FALSE
266	0.0149927	NA	0.36	0.155844	0.204156	TRUE	1.11412	2 vs 1	0.408312	2 vs 1	-0.28	-0.688312	Nr2c1:chr10:94195314-94195686:1, Nr2c1:chr10:94196741-94197256:1	Nr2c1	NA	NA	FALSE	FALSE	0.0149927	NA	FALSE
267	6.78485e-05	0.000293546	0.924242	0.841667	0.0825758	FALSE	2.52675	4 vs 3	0.407792	4 vs 3	0.886364	0.478571	Afdn:chr17:13897252-13898015:1, Afdn:chr17:13897866-13898451:1, Afdn:chr17:13898056-13898471:1, Afdn:chr17:13905360-13905849:1	Afdn	0.000449961	0.001823	TRUE	TRUE	0.000293546	0.00197251	TRUE
268	1	NA	0.601351	0.5	0.101351	TRUE	Inf	3 vs 2	0.405405	3 vs 2	-0.594595	-1	Erbb2:chr11:98436909-98437102:1, Erbb2:chr11:98436708-98437305:1, Erbb2:chr11:98437271-98437716:1	Erbb2	NA	NA	FALSE	FALSE	1	NA	FALSE
269	0.245604	NA	0.583333	0.380952	0.202381	TRUE	#NAME?	1 vs 2	0.404762	1 vs 3	0.166667	-0.238095	Myh9:chr15:77760579-77760877:-1, Myh9:chr15:77760727-77761064:-1, Myh9:chr15:77760987-77761385:-1	Myh9	NA	NA	FALSE	FALSE	0.245604	NA	FALSE
270	0.112906	NA	0.557971	0.409091	0.14888	TRUE	1.71765	2 vs 1	0.403162	2 vs 1	0.130435	-0.272727	Il6st:chr13:112506497-112506863:1, Il6st:chr13:112508090-112508495:1, Il6st:chr13:112508957-112509317:1, Il6st:chr13:112509119-112509343:1	Il6st	NA	NA	FALSE	FALSE	0.112906	NA	FALSE
271	0.00853229	NA	0.678571	0.473251	0.20532	TRUE	2.01085	4 vs 1	0.402557	4 vs 1	0.464286	0.0617284	Nufip2:chr11:77710370-77710806:1, Nufip2:chr11:77711552-77712082:1, Nufip2:chr11:77711927-77712174:1, Nufip2:chr11:77717568-77718008:1	Nufip2	NA	NA	FALSE	FALSE	0.00853229	NA	FALSE
272	0.186727	NA	0.571429	0.340909	0.230519	TRUE	Inf	1 vs 3	0.400974	1 vs 4	0.0714286	-0.329545	Ncoa7:chr10:30645525-30645984:-1, Ncoa7:chr10:30646328-30646634:-1, Ncoa7:chr10:30646948-30647256:-1, Ncoa7:chr10:30695855-30696249:-1	Ncoa7	NA	NA	FALSE	FALSE	0.186727	NA	FALSE
273	0.0365374	0.0158171	0.601571	0.492754	0.108818	TRUE	#NAME?	2 vs 1	0.400527	4 vs 2	-0.121212	-0.521739	Dusp10:chr1:184074901-184075058:1, Dusp10:chr1:184074563-184074874:1, Dusp10:chr1:184075044-184075633:1, Dusp10:chr1:184075098-184075644:1	Dusp10	NA	NA	FALSE	FALSE	0.0365374	NA	FALSE
274	1	NA	0.2	0	0.2	TRUE	Inf	1 vs 2	0.4	1 vs 2	-0.6	-1	Dgkg:chr16:22466518-22466909:-1, Dgkg:chr16:22468488-22468815:-1	Dgkg	NA	NA	FALSE	FALSE	1	NA	FALSE
275	0.580543	NA	1	0.8	0.2	TRUE	Inf	2 vs 1	0.4	2 vs 1	1	0.6	Fam209:chr2:172473869-172474140:1, Fam209:chr2:172473905-172474332:1	Fam209	NA	NA	FALSE	FALSE	0.580543	NA	FALSE
276	1	NA	1	0.8	0.2	TRUE	Inf	1 vs 2	0.4	1 vs 2	1	0.6	Lgals9:chr11:78962974-78963333:-1, Lgals9:chr11:78963183-78963456:-1	Lgals9	NA	NA	FALSE	FALSE	1	NA	FALSE
277	0.517673	NA	0.6	0.4	0.2	TRUE	0.81093	2 vs 1	0.4	2 vs 1	0.2	-0.2	Mcmdc2:chr1:9920901-9921213:1, Mcmdc2:chr1:9940522-9941014:1	Mcmdc2	NA	NA	FALSE	FALSE	0.517673	NA	FALSE
278	0.836454	NA	0.4	0.2	0.2	TRUE	0.980829	1 vs 2	0.4	1 vs 2	-0.2	-0.6	Sugct:chr13:17682694-17683039:-1, Sugct:chr13:17683569-17683924:-1	Sugct	NA	NA	FALSE	FALSE	0.836454	NA	FALSE
279	0.954564	NA	0.2	0	0.2	TRUE	Inf	1 vs 2	0.4	1 vs 2	-0.6	-1	Tent5a:chr9:85322892-85323181:-1, Tent5a:chr9:85324136-85324448:-1	Tent5a	NA	NA	FALSE	FALSE	0.954564	NA	FALSE
280	9.55944e-21	1.08318e-16	0.673745	0.473917	0.199828	FALSE	0.8296	2 vs 1	0.399657	2 vs 1	0.34749	-0.0521662	Aars:chr8:111055190-111055599:1, Aars:chr8:111057219-111057636:1	Aars	2.9611e-19	3.01548e-15	TRUE	TRUE	1.08318e-16	3.19917e-15	TRUE
281	0.0620311	NA	0.416667	0.199275	0.217391	TRUE	1.70475	2 vs 5	0.399209	1 vs 5	-0.151515	-0.550725	Zfyve9:chr4:108637401-108637775:-1, Zfyve9:chr4:108637576-108637816:-1, Zfyve9:chr4:108637699-108638307:-1, Zfyve9:chr4:108638525-108638950:-1, Zfyve9:chr4:108638823-108639100:-1	Zfyve9	NA	NA	FALSE	FALSE	0.0620311	NA	FALSE
282	0.0934572	0.0924713	0.552381	0.477419	0.0749616	TRUE	#NAME?	2 vs 1	0.398618	5 vs 1	0.285714	-0.112903	Cyld:chr8:88746965-88747450:1, Cyld:chr8:88747284-88747474:1, Cyld:chr8:88747300-88747714:1, Cyld:chr8:88747617-88747933:1, Cyld:chr8:88748087-88748525:1, Cyld:chr8:88751572-88751946:1	Cyld	NA	NA	FALSE	FALSE	0.0934572	NA	FALSE
283	0.0220099	NA	0.80597	0.606667	0.199303	TRUE	1.14967	3 vs 1	0.398607	3 vs 1	0.61194	0.213333	Arnt:chr3:95495214-95495591:1, Arnt:chr3:95496619-95497240:1, Arnt:chr3:95496887-95497240:1	Arnt	NA	NA	FALSE	FALSE	0.0220099	NA	FALSE
284	0.243465	NA	0.842105	0.642857	0.199248	TRUE	1.08619	2 vs 1	0.398496	2 vs 1	0.684211	0.285714	Cnnm4:chr1:36508200-36508776:1, Cnnm4:chr1:36508445-36508772:1	Cnnm4	NA	NA	FALSE	FALSE	0.243465	NA	FALSE
285	0.128665	NA	0.197802	0	0.197802	TRUE	Inf	3 vs 1	0.395604	3 vs 1	-0.604396	-1	Riox2:chr16:59491726-59492371:1, Riox2:chr16:59492052-59492212:1, Riox2:chr16:59492143-59492509:1	Riox2	NA	NA	FALSE	FALSE	0.128665	NA	FALSE
286	0.106093	NA	0.68	0.653846	0.0261538	TRUE	1.76359	2 vs 1	0.395385	2 vs 1	0.28	-0.115385	Klhl42:chr6:147107755-147108203:1, Klhl42:chr6:147108043-147108800:1, Klhl42:chr6:147112439-147112766:1	Klhl42	NA	NA	FALSE	FALSE	0.106093	NA	FALSE
287	0.445132	NA	0.768939	0.571429	0.197511	TRUE	0.91465	1 vs 2	0.395022	1 vs 2	0.537879	0.142857	Ajuba:chr14:54567463-54567708:-1, Ajuba:chr14:54567579-54567999:-1	Ajuba	NA	NA	FALSE	FALSE	0.445132	NA	FALSE
288	0.0135112	NA	0.739726	0.542373	0.197353	TRUE	1.22595	1 vs 3	0.394706	1 vs 3	0.479452	0.0847458	Sclt1:chr3:41626713-41627015:-1, Sclt1:chr3:41626827-41627186:-1, Sclt1:chr3:41626972-41627261:-1	Sclt1	NA	NA	FALSE	FALSE	0.0135112	NA	FALSE
289	0.428393	NA	0.416667	0.360759	0.0559072	TRUE	1.56219	1 vs 2	0.394515	1 vs 2	0.166667	-0.227848	Fbxo32:chr15:58175874-58176214:-1, Fbxo32:chr15:58180074-58180395:-1, Fbxo32:chr15:58180805-58181162:-1	Fbxo32	NA	NA	FALSE	FALSE	0.428393	NA	FALSE
290	0.100996	0.320634	0.45	0.350211	0.099789	TRUE	1.29721	2 vs 4	0.393038	2 vs 4	-0.05	-0.443038	Frrs1l:chr4:56957173-56957499:-1, Frrs1l:chr4:56957344-56957671:-1, Frrs1l:chr4:56957534-56957849:-1, Frrs1l:chr4:56960077-56960524:-1	Frrs1l	NA	NA	FALSE	FALSE	0.320634	NA	FALSE
291	0.537052	NA	0.485714	0.395062	0.0906526	TRUE	#NAME?	3 vs 1	0.389771	2 vs 1	0.142857	-0.246914	Brdt:chr5:107385415-107385670:1, Brdt:chr5:107385493-107385876:1, Brdt:chr5:107385670-107386537:1, Brdt:chr5:107385961-107386500:1, Brdt:chr5:107386602-107387043:1, Brdt:chr5:107386759-107387064:1	Brdt	NA	NA	FALSE	FALSE	0.537052	NA	FALSE
292	0.170922	NA	0.483333	0.444444	0.0388889	TRUE	1.04145	2 vs 3	0.388889	2 vs 3	0.333333	-0.0555556	Caskin2:chr11:115798986-115799301:-1, Caskin2:chr11:115799180-115799459:-1, Caskin2:chr11:115799088-115799824:-1	Caskin2	NA	NA	FALSE	FALSE	0.170922	NA	FALSE
293	0.221557	NA	0.444444	0.25	0.194444	TRUE	#NAME?	2 vs 1	0.388889	3 vs 1	-0.111111	-0.5	Drp2:chrX:134453010-134453427:1, Drp2:chrX:134456188-134456382:1, Drp2:chrX:134456246-134456548:1	Drp2	NA	NA	FALSE	FALSE	0.221557	NA	FALSE
294	0.567117	NA	0.193548	0	0.193548	TRUE	Inf	1 vs 2	0.387097	1 vs 2	-0.612903	-1	Frzb:chr2:80411999-80412231:-1, Frzb:chr2:80412040-80412663:-1	Frzb	NA	NA	FALSE	FALSE	0.567117	NA	FALSE
295	0.011205	NA	0.333333	0.209195	0.124138	TRUE	#NAME?	1 vs 2	0.386207	2 vs 4	0	-0.386207	Zfhx2:chr14:55060254-55060423:-1, Zfhx2:chr14:55060297-55060684:-1, Zfhx2:chr14:55061577-55062199:-1, Zfhx2:chr14:55062246-55062681:-1	Zfhx2	NA	NA	FALSE	FALSE	0.011205	NA	FALSE
296	0.0434303	NA	0.280488	0.166667	0.113821	TRUE	1.41707	2 vs 3	0.384681	2 vs 3	-0.317073	-0.701754	Dynlt2a2:chr17:14991284-14991546:-1, Dynlt2a2:chr17:14991066-14991802:-1, Dynlt2a2:chr17:15009014-15009735:-1	Dynlt2a2	NA	NA	FALSE	FALSE	0.0434303	NA	FALSE
297	0.0642325	NA	0.656863	0.465517	0.191346	TRUE	1.45343	2 vs 1	0.382691	3 vs 1	0.313725	-0.0689655	Stk35:chr2:129827700-129827951:1, Stk35:chr2:129831683-129832232:1, Stk35:chr2:129831999-129832287:1	Stk35	NA	NA	FALSE	FALSE	0.0642325	NA	FALSE
298	4.47667e-05	0.000196868	0.724832	0.563636	0.161196	TRUE	3.01945	4 vs 5	0.382001	1 vs 5	0.345638	-0.0363636	Slc1a3:chr15:8634119-8634468:-1, Slc1a3:chr15:8634735-8635077:-1, Slc1a3:chr15:8634636-8635460:-1, Slc1a3:chr15:8635780-8636201:-1, Slc1a3:chr15:8683864-8684248:-1	Slc1a3	NA	NA	FALSE	FALSE	0.000196868	NA	FALSE
299	6.17912e-21	2.05961e-15	0.49438	0.336601	0.157778	TRUE	2.18582	4 vs 1	0.38098	3 vs 1	0.341764	-0.0392157	Ttyh1:chr7:4133889-4134276:1, Ttyh1:chr7:4134442-4135010:1, Ttyh1:chr7:4134935-4135374:1, Ttyh1:chr7:4135846-4136228:1	Ttyh1	NA	NA	FALSE	FALSE	2.05961e-15	NA	FALSE
300	0.0356646	NA	0.87037	0.68	0.19037	TRUE	1.15047	1 vs 2	0.380741	1 vs 2	0.740741	0.36	L2hgdh:chr12:69690459-69690738:-1, L2hgdh:chr12:69692197-69692523:-1	L2hgdh	NA	NA	FALSE	FALSE	0.0356646	NA	FALSE
301	0.521009	NA	0.722222	0.532258	0.189964	TRUE	0.944462	1 vs 3	0.379928	1 vs 3	0.444444	0.0645161	Lrrc3:chr10:77897575-77897869:-1, Lrrc3:chr10:77897575-77898081:-1, Lrrc3:chr10:77898939-77899238:-1	Lrrc3	NA	NA	FALSE	FALSE	0.521009	NA	FALSE
302	0.310874	NA	0.529412	0.454545	0.0748663	TRUE	Inf	3 vs 1	0.379679	3 vs 2	-0.529412	-0.909091	Col5a1:chr2:28036833-28037798:1, Col5a1:chr2:28037206-28037556:1, Col5a1:chr2:28038788-28039184:1	Col5a1	NA	NA	FALSE	FALSE	0.310874	NA	FALSE
303	0.161882	NA	0.769231	0.57971	0.189521	TRUE	Inf	2 vs 1	0.379041	3 vs 1	0.538462	0.15942	Edem3:chr1:151819500-151819796:1, Edem3:chr1:151821704-151822032:1, Edem3:chr1:151821869-151822328:1	Edem3	NA	NA	FALSE	FALSE	0.161882	NA	FALSE
304	0.620624	NA	0.188679	0	0.188679	TRUE	Inf	2 vs 1	0.377358	2 vs 1	-0.622642	-1	Ccdc80:chr16:45127306-45127689:1, Ccdc80:chr16:45127473-45127932:1	Ccdc80	NA	NA	FALSE	FALSE	0.620624	NA	FALSE
305	0.479157	NA	0.666667	0.478873	0.187793	TRUE	0.777705	1 vs 2	0.375587	1 vs 2	0.333333	-0.0422535	Cux2:chr5:121858330-121858776:-1, Cux2:chr5:121860161-121860616:-1	Cux2	NA	NA	FALSE	FALSE	0.479157	NA	FALSE
306	6.77344e-30	4.28298e-23	0.446154	0.293596	0.152558	TRUE	2.3111	6 vs 3	0.375458	6 vs 3	-0.0769231	-0.452381	Phf20l1:chr15:66609676-66610108:1, Phf20l1:chr15:66610344-66610876:1, Phf20l1:chr15:66611226-66611638:1, Phf20l1:chr15:66643150-66644002:1, Phf20l1:chr15:66643529-66643815:1, Phf20l1:chr15:66644675-66645124:1	Phf20l1	NA	NA	FALSE	FALSE	4.28298e-23	NA	FALSE
307	1	NA	1	0.813953	0.186047	TRUE	Inf	1 vs 2	0.372093	1 vs 2	1	0.627907	Fhl4:chr10:85097736-85098028:-1, Fhl4:chr10:85097454-85098455:-1	Fhl4	NA	NA	FALSE	FALSE	1	NA	FALSE
308	0.000437015	0.00787504	0.358696	0.172691	0.186005	TRUE	0.985646	1 vs 2	0.37201	1 vs 2	-0.282609	-0.654618	Zfp521:chr18:13687013-13687376:-1, Zfp521:chr18:13688203-13688541:-1	Zfp521	NA	NA	FALSE	FALSE	0.00787504	NA	FALSE
309	0.00539219	0.0133911	0.948276	0.763158	0.185118	TRUE	2.50395	1 vs 3	0.370236	1 vs 3	0.896552	0.526316	Dipk2a:chr9:94517858-94518187:-1, Dipk2a:chr9:94518906-94519217:-1, Dipk2a:chr9:94518822-94519426:-1	Dipk2a	NA	NA	FALSE	FALSE	0.0133911	NA	FALSE
310	0.478319	NA	0.44186	0.291667	0.150194	TRUE	Inf	1 vs 2	0.369186	1 vs 3	-0.255814	-0.625	Sdc4:chr2:164424221-164424608:-1, Sdc4:chr2:164425541-164425775:-1, Sdc4:chr2:164425310-164426020:-1, Sdc4:chr2:164425695-164426427:-1	Sdc4	NA	NA	FALSE	FALSE	0.478319	NA	FALSE
311	0.800446	NA	0.333333	0.29087	0.0424628	TRUE	#NAME?	1 vs 2	0.367834	3 vs 4	0.25	-0.117834	Mc4r:chr18:66857704-66858063:-1, Mc4r:chr18:66858471-66858918:-1, Mc4r:chr18:66858690-66859213:-1, Mc4r:chr18:66858754-66859027:-1	Mc4r	NA	NA	FALSE	FALSE	0.800446	NA	FALSE
312	0.0136999	NA	0.527273	0.384956	0.142317	TRUE	1.32398	3 vs 1	0.367498	2 vs 1	0.509091	0.141593	Usp30:chr5:114121798-114122183:1, Usp30:chr5:114122525-114122958:1, Usp30:chr5:114123037-114123595:1	Usp30	NA	NA	FALSE	FALSE	0.0136999	NA	FALSE
313	1.4861e-42	2.58203e-34	0.392483	0.208808	0.183675	FALSE	0.895237	1 vs 2	0.36735	1 vs 2	-0.215033	-0.582383	Psip1:chr4:83455651-83456024:-1, Psip1:chr4:83461858-83462227:-1	Psip1	1.14385e-40	1.73713e-32	TRUE	TRUE	2.58203e-34	1.82177e-32	TRUE
314	0.275022	NA	1	0.816667	0.183333	TRUE	Inf	2 vs 1	0.366667	2 vs 1	1	0.633333	Zfp128:chr7:12891116-12892026:1, Zfp128:chr7:12891442-12891860:1	Zfp128	NA	NA	FALSE	FALSE	0.275022	NA	FALSE
315	0.742585	NA	0.583333	0.540984	0.0423497	TRUE	Inf	3 vs 1	0.36612	3 vs 2	0.833333	0.467213	Dlgap1:chr17:70816328-70816761:1, Dlgap1:chr17:70819122-70819412:1, Dlgap1:chr17:70819390-70819785:1, Dlgap1:chr17:70820816-70821208:1, Dlgap1:chr17:70821016-70821413:1	Dlgap1	NA	NA	FALSE	FALSE	0.742585	NA	FALSE
316	0.00482763	NA	0.628049	0.479167	0.148882	TRUE	2.64302	5 vs 2	0.365346	5 vs 2	0.219512	-0.145833	Ttc19:chr11:62314484-62314845:1, Ttc19:chr11:62314614-62315241:1, Ttc19:chr11:62314891-62315275:1, Ttc19:chr11:62316025-62316458:1, Ttc19:chr11:62317421-62317838:1	Ttc19	NA	NA	FALSE	FALSE	0.00482763	NA	FALSE
317	0.341495	NA	0.59375	0.411483	0.182267	TRUE	0.785612	1 vs 3	0.364533	1 vs 3	0.1875	-0.177033	Me1:chr9:86581343-86581702:-1, Me1:chr9:86581226-86582041:-1, Me1:chr9:86582350-86582773:-1	Me1	NA	NA	FALSE	FALSE	0.341495	NA	FALSE
318	2.81647e-13	9.68806e-09	0.396825	0.214665	0.18216	FALSE	0.87832	1 vs 2	0.36432	1 vs 2	-0.206349	-0.57067	Fndc4:chr5:31292242-31292624:-1, Fndc4:chr5:31292854-31293237:-1	Fndc4	5.50294e-12	1.40506e-07	TRUE	TRUE	9.68806e-09	1.47351e-07	TRUE
319	0.853514	NA	0.681818	0.5	0.181818	TRUE	0.76214	2 vs 1	0.363636	2 vs 1	0.363636	0	Zic2:chr14:122479072-122479463:1, Zic2:chr14:122479996-122480328:1	Zic2	NA	NA	FALSE	FALSE	0.853514	NA	FALSE
320	0.612084	NA	0.875	0.693299	0.181701	TRUE	Inf	1 vs 3	0.363402	1 vs 3	0.75	0.386598	Gipr:chr7:19156061-19156484:-1, Gipr:chr7:19156934-19157233:-1, Gipr:chr7:19157188-19157629:-1	Gipr	NA	NA	FALSE	FALSE	0.612084	NA	FALSE
321	0.075519	NA	0.733333	0.551724	0.181609	TRUE	0.952658	3 vs 1	0.363218	3 vs 1	0.466667	0.103448	Ing5:chr1:93818230-93818385:1, Ing5:chr1:93818929-93819238:1, Ing5:chr1:93821707-93822100:1	Ing5	NA	NA	FALSE	FALSE	0.075519	NA	FALSE
322	0.307606	NA	0.625	0.607143	0.0178571	TRUE	Inf	1 vs 2	0.363095	1 vs 2	0.625	0.261905	Gfod1:chr13:43195244-43195615:-1, Gfod1:chr13:43195510-43195867:-1, Gfod1:chr13:43195756-43196251:-1	Gfod1	NA	NA	FALSE	FALSE	0.307606	NA	FALSE
323	0.0135644	0.0399352	0.484375	0.482659	0.00171604	TRUE	-1.72507	5 vs 3	0.362355	3 vs 1	0.4375	0.0751445	Zfp846:chr9:20594617-20595308:1, Zfp846:chr9:20594892-20595198:1, Zfp846:chr9:20596541-20596929:1, Zfp846:chr9:20602086-20602446:1, Zfp846:chr9:20605076-20605399:1	Zfp846	NA	NA	FALSE	FALSE	0.0399352	NA	FALSE
324	0.441531	NA	0.780488	0.6	0.180488	TRUE	0.863046	1 vs 2	0.360976	1 vs 2	0.560976	0.2	Nt5dc1:chr10:34303596-34303947:-1, Nt5dc1:chr10:34304754-34305059:-1	Nt5dc1	NA	NA	FALSE	FALSE	0.441531	NA	FALSE
325	1	NA	1	0.82	0.18	TRUE	Inf	2 vs 1	0.36	2 vs 1	1	0.64	Scube3:chr17:28171113-28171467:1, Scube3:chr17:28174538-28174843:1	Scube3	NA	NA	FALSE	FALSE	1	NA	FALSE
326	0.292857	NA	0.679688	0.5	0.179688	TRUE	0.752336	2 vs 1	0.359375	2 vs 1	0.359375	0	Pole:chr5:110290832-110291239:1, Pole:chr5:110337094-110337473:1	Pole	NA	NA	FALSE	FALSE	0.292857	NA	FALSE
327	7.74666e-08	2.38611e-06	0.716981	0.652294	0.0646876	FALSE	0.882304	1 vs 2	0.359287	1 vs 2	0.320755	-0.0385321	Surf4:chr2:26920032-26920369:-1, Surf4:chr2:26920784-26921181:-1, Surf4:chr2:26921685-26922099:-1	Surf4	8.44851e-07	2.29332e-05	TRUE	TRUE	2.38611e-06	2.44384e-05	TRUE
328	0.268526	NA	0.823529	0.644068	0.179462	TRUE	0.947381	1 vs 2	0.358923	1 vs 2	0.647059	0.288136	Fam161b:chr12:84345309-84345674:-1, Fam161b:chr12:84346445-84346803:-1	Fam161b	NA	NA	FALSE	FALSE	0.268526	NA	FALSE
329	0.758928	NA	0.5	0.44403	0.0559701	TRUE	Inf	1 vs 2	0.358209	1 vs 2	0.5	0.141791	Scn3a:chr2:65458290-65458512:-1, Scn3a:chr2:65458228-65458696:-1, Scn3a:chr2:65459529-65460300:-1	Scn3a	NA	NA	FALSE	FALSE	0.758928	NA	FALSE
330	0.106091	NA	0.558824	0.379747	0.179077	TRUE	1.64581	3 vs 1	0.358153	3 vs 1	0.117647	-0.240506	Mbp:chr18:82554946-82555325:1, Mbp:chr18:82558228-82558743:1, Mbp:chr18:82585295-82585637:1	Mbp	NA	NA	FALSE	FALSE	0.106091	NA	FALSE
331	0.0678312	0.23491	0.372549	0.291883	0.0806665	TRUE	Inf	1 vs 3	0.357818	1 vs 2	0.176471	-0.181347	Tmem74:chr15:43861639-43861975:-1, Tmem74:chr15:43863311-43863680:-1, Tmem74:chr15:43863347-43863937:-1, Tmem74:chr15:43866084-43866466:-1	Tmem74	NA	NA	FALSE	FALSE	0.23491	NA	FALSE
332	0.0295893	NA	0.645522	0.581395	0.064127	TRUE	2.1564	4 vs 3	0.356821	4 vs 3	0.19403	-0.162791	Specc1:chr11:62139068-62139877:1, Specc1:chr11:62139350-62139736:1, Specc1:chr11:62219501-62220051:1, Specc1:chr11:62222521-62223013:1, Specc1:chr11:62222719-62223013:1	Specc1	NA	NA	FALSE	FALSE	0.0295893	NA	FALSE
333	0.0765487	0.10239	0.466667	0.292517	0.17415	TRUE	1.18003	4 vs 1	0.355532	4 vs 1	-0.0526316	-0.408163	Rif1:chr2:52121747-52122094:1, Rif1:chr2:52121589-52121923:1, Rif1:chr2:52121946-52122259:1, Rif1:chr2:52122055-52122361:1	Rif1	NA	NA	FALSE	FALSE	0.10239	NA	FALSE
334	0.000163005	0.0959107	0.365854	0.188119	0.177735	FALSE	0.912234	2 vs 1	0.35547	2 vs 1	-0.268293	-0.623762	Mul1:chr4:138439521-138439934:1, Mul1:chr4:138441918-138442265:1	Mul1	0.000992883	0.225093	TRUE	FALSE	0.0959107	0.253209	FALSE
335	0.691626	NA	0.7	0.523256	0.176744	TRUE	0.987387	3 vs 1	0.353488	3 vs 1	0.4	0.0465116	Hmgcll1:chr9:76134401-76134736:1, Hmgcll1:chr9:76135841-76136215:1, Hmgcll1:chr9:76135961-76136402:1	Hmgcll1	NA	NA	FALSE	FALSE	0.691626	NA	FALSE
336	0.00212187	0.00366073	0.747549	0.625541	0.122008	TRUE	2.1242	1 vs 2	0.352559	1 vs 3	0.127451	-0.225108	Snx18:chr13:113592139-113592527:-1, Snx18:chr13:113592781-113593121:-1, Snx18:chr13:113593488-113593830:-1, Snx18:chr13:113594324-113594620:-1, Snx18:chr13:113594172-113595040:-1	Snx18	NA	NA	FALSE	FALSE	0.00366073	NA	FALSE
337	0.666461	NA	0.509434	0.333333	0.176101	TRUE	0.730888	2 vs 1	0.352201	2 vs 1	0.0188679	-0.333333	Ttk:chr9:83871957-83872355:1, Ttk:chr9:83872129-83872376:1	Ttk	NA	NA	FALSE	FALSE	0.666461	NA	FALSE
338	0.00119911	0.00276231	0.786624	0.662963	0.123661	TRUE	1.66092	3 vs 1	0.35197	3 vs 2	0.203822	-0.148148	Hsdl2:chr4:59617585-59617905:1, Hsdl2:chr4:59617711-59618060:1, Hsdl2:chr4:59618307-59618694:1	Hsdl2	NA	NA	FALSE	FALSE	0.00276231	NA	FALSE
339	0.286969	0.396588	0.555556	0.365591	0.189964	TRUE	1.25276	1 vs 4	0.350929	1 vs 4	0.0606061	-0.290323	Uggt2:chr14:118982016-118982282:-1, Uggt2:chr14:118982916-118983292:-1, Uggt2:chr14:118986184-118986467:-1, Uggt2:chr14:118986182-118986930:-1	Uggt2	NA	NA	FALSE	FALSE	0.396588	NA	FALSE
340	0.0928216	0.101018	0.707143	0.713322	-0.00617923	TRUE	#NAME?	3 vs 1	0.349603	5 vs 4	0.342857	-0.00674536	Flrt2:chr12:95780579-95781146:1, Flrt2:chr12:95780836-95781078:1, Flrt2:chr12:95782409-95782747:1, Flrt2:chr12:95783226-95783621:1, Flrt2:chr12:95784824-95785231:1	Flrt2	NA	NA	FALSE	FALSE	0.101018	NA	FALSE
341	0.0159223	0.0571422	0.936364	0.761905	0.174459	TRUE	1.52567	2 vs 1	0.348918	2 vs 1	0.872727	0.52381	Fkbp9:chr6:56878128-56878557:1, Fkbp9:chr6:56879011-56879371:1	Fkbp9	NA	NA	FALSE	FALSE	0.0571422	NA	FALSE
342	0.153276	NA	0.627907	0.585586	0.0423214	TRUE	Inf	2 vs 1	0.348837	3 vs 2	0.348837	0	Zfp952:chr17:33004589-33004697:1, Zfp952:chr17:33004967-33005219:1, Zfp952:chr17:33004711-33005374:1, Zfp952:chr17:33005151-33005466:1	Zfp952	NA	NA	FALSE	FALSE	0.153276	NA	FALSE
343	0.119335	0.211978	0.734568	0.581395	0.153173	TRUE	1.26292	4 vs 1	0.347115	4 vs 1	0.37037	0.0232558	Lekr1:chr3:65683955-65684363:1, Lekr1:chr3:65684223-65684388:1, Lekr1:chr3:65685270-65685532:1, Lekr1:chr3:65685814-65686216:1	Lekr1	NA	NA	FALSE	FALSE	0.211978	NA	FALSE
344	8.11348e-10	6.41996e-09	0.426782	0.339286	0.0874966	FALSE	0.892547	2 vs 1	0.345801	2 vs 1	0.55684	0.211039	Gclm:chr3:122266141-122266499:1, Gclm:chr3:122266528-122266959:1, Gclm:chr3:122267370-122267826:1	Gclm	1.18438e-08	9.45518e-08	TRUE	TRUE	6.41996e-09	9.91583e-08	TRUE
345	0.121418	NA	0.672414	0.5	0.172414	TRUE	1.25276	3 vs 1	0.344828	3 vs 1	0.344828	0	Scyl3:chr1:163953389-163953809:1, Scyl3:chr1:163953636-163954063:1, Scyl3:chr1:163954720-163955126:1	Scyl3	NA	NA	FALSE	FALSE	0.121418	NA	FALSE
346	0.21821	NA	0.75	0.586207	0.163793	TRUE	Inf	1 vs 3	0.344828	1 vs 2	0	-0.344828	Ern1:chr11:106392989-106393347:-1, Ern1:chr11:106394608-106395042:-1, Ern1:chr11:106394996-106395223:-1	Ern1	NA	NA	FALSE	FALSE	0.21821	NA	FALSE
347	0.574144	NA	0.8	0.665441	0.134559	TRUE	#NAME?	2 vs 1	0.344118	3 vs 2	0.8	0.455882	St18:chr1:6858431-6858718:1, St18:chr1:6858527-6859056:1, St18:chr1:6860575-6860939:1	St18	NA	NA	FALSE	FALSE	0.574144	NA	FALSE
348	0.168809	NA	0.362745	0.237892	0.124853	TRUE	#NAME?	1 vs 2	0.343891	3 vs 7	-0.117647	-0.461538	Smarca1:chrX:47809345-47809555:-1, Smarca1:chrX:47809401-47809767:-1, Smarca1:chrX:47809574-47809748:-1, Smarca1:chrX:47809628-47810001:-1, Smarca1:chrX:47810054-47810146:-1, Smarca1:chrX:47810053-47810461:-1, Smarca1:chrX:47810299-47810481:-1	Smarca1	NA	NA	FALSE	FALSE	0.168809	NA	FALSE
349	0.192671	0.115961	0.477778	0.363636	0.114141	TRUE	1.03407	2 vs 3	0.341414	2 vs 3	-0.0222222	-0.363636	Dync2h1:chr9:6929007-6929317:-1, Dync2h1:chr9:6929047-6929500:-1, Dync2h1:chr9:6929263-6929680:-1	Dync2h1	NA	NA	FALSE	FALSE	0.192671	NA	FALSE
350	0.00117148	0.0106902	0.333333	0.265651	0.0676819	TRUE	1.26827	3 vs 4	0.340948	3 vs 4	-0.166667	-0.507614	Ntm:chr9:28994747-28995031:-1, Ntm:chr9:28994756-28995351:-1, Ntm:chr9:28995805-28996543:-1, Ntm:chr9:28995994-28996337:-1	Ntm	NA	NA	FALSE	FALSE	0.0106902	NA	FALSE
351	0.513523	NA	1	0.829787	0.170213	TRUE	Inf	1 vs 2	0.340426	1 vs 2	1	0.659574	Plxnd1:chr6:115954801-115955118:-1, Plxnd1:chr6:115954815-115955540:-1	Plxnd1	NA	NA	FALSE	FALSE	0.513523	NA	FALSE
352	0.0857973	NA	0.979167	0.809211	0.169956	TRUE	Inf	2 vs 1	0.339912	3 vs 1	0.958333	0.618421	Simc1:chr13:54550472-54550917:1, Simc1:chr13:54550364-54551238:1, Simc1:chr13:54550918-54551290:1	Simc1	NA	NA	FALSE	FALSE	0.0857973	NA	FALSE
353	0.0759231	0.190629	0.493023	0.323529	0.169494	TRUE	1.17622	2 vs 3	0.338988	1 vs 3	-0.0139535	-0.352941	Dusp16:chr6:134715461-134715734:-1, Dusp16:chr6:134715461-134715967:-1, Dusp16:chr6:134737500-134737829:-1	Dusp16	NA	NA	FALSE	FALSE	0.190629	NA	FALSE
354	2.31489e-05	4.30613e-05	0.786458	0.721899	0.0645591	TRUE	#NAME?	2 vs 1	0.337573	3 vs 1	0.421875	0.0843023	Map4:chr9:110005057-110005399:1, Map4:chr9:110082514-110083317:1, Map4:chr9:110082842-110083157:1, Map4:chr9:110083549-110083955:1	Map4	NA	NA	FALSE	FALSE	4.30613e-05	NA	FALSE
355	0.0277172	0.053639	0.810256	0.642157	0.1681	TRUE	1.50408	4 vs 2	0.33733	4 vs 2	0.646154	0.308824	Slf2:chr19:44981875-44982592:1, Slf2:chr19:44982748-44982959:1, Slf2:chr19:44982478-44983375:1, Slf2:chr19:44983424-44983784:1	Slf2	NA	NA	FALSE	FALSE	0.053639	NA	FALSE
356	0.0524263	0.207356	0.57277	0.508772	0.063998	TRUE	0.807506	3 vs 2	0.336916	3 vs 2	0.521127	0.184211	B230307C23Rik:chr16:98016091-98016651:1, B230307C23Rik:chr16:98016380-98016768:1, B230307C23Rik:chr16:98031194-98031389:1, B230307C23Rik:chr16:98031079-98031713:1	B230307C23Rik	NA	NA	FALSE	FALSE	0.207356	NA	FALSE
357	3.03878e-07	1.28247e-07	0.43769	0.378659	0.0590314	FALSE	1.09287	3 vs 4	0.336326	3 vs 4	0.0851064	-0.25122	Sc5d:chr9:42251585-42251929:-1, Sc5d:chr9:42253354-42253647:-1, Sc5d:chr9:42254087-42254548:-1, Sc5d:chr9:42254698-42255107:-1, Sc5d:chr9:42254983-42255478:-1	Sc5d	3.00331e-06	1.52262e-06	TRUE	TRUE	3.03878e-07	3.65806e-06	TRUE
358	0.219508	NA	0.536326	0.368421	0.167905	TRUE	0.684557	1 vs 2	0.33581	1 vs 2	0.0726521	-0.263158	Ccna2:chr3:36564856-36565221:-1, Ccna2:chr3:36565928-36566337:-1	Ccna2	NA	NA	FALSE	FALSE	0.219508	NA	FALSE
359	9.61975e-48	3.25345e-38	0.254808	0.0870066	0.167801	FALSE	1.39105	3 vs 1	0.335602	3 vs 1	-0.490385	-0.825987	Lrrc58:chr16:37883338-37883555:1, Lrrc58:chr16:37883904-37884274:1, Lrrc58:chr16:37888453-37888858:1	Lrrc58	9.04969e-46	2.71719e-36	TRUE	TRUE	3.25345e-38	2.84957e-36	TRUE
360	0.29805	NA	0.454545	0.373849	0.0806965	TRUE	1.40089	3 vs 1	0.335008	3 vs 2	-0.272727	-0.607735	Kirrel3:chr9:35030426-35030968:1, Kirrel3:chr9:35036000-35036310:1, Kirrel3:chr9:35036381-35036716:1, Kirrel3:chr9:35036553-35036716:1	Kirrel3	NA	NA	FALSE	FALSE	0.29805	NA	FALSE
361	0.0478896	NA	0.355556	0.188119	0.167437	TRUE	0.867573	2 vs 1	0.334873	2 vs 1	-0.288889	-0.623762	Chpf2:chr5:24592088-24592533:1, Chpf2:chr5:24593912-24594535:1	Chpf2	NA	NA	FALSE	FALSE	0.0478896	NA	FALSE
362	0.158292	0.160256	0.559259	0.523622	0.0356372	TRUE	Inf	1 vs 7	0.334733	4 vs 5	0.311111	-0.023622	Fam126b:chr1:58522806-58523209:-1, Fam126b:chr1:58523141-58523400:-1, Fam126b:chr1:58524686-58525030:-1, Fam126b:chr1:58526336-58526556:-1, Fam126b:chr1:58527685-58527932:-1, Fam126b:chr1:58527762-58528065:-1, Fam126b:chr1:58528030-58528253:-1	Fam126b	NA	NA	FALSE	FALSE	0.160256	NA	FALSE
363	0.463489	NA	0.909091	0.741935	0.167155	TRUE	1.24653	1 vs 2	0.334311	1 vs 2	0.818182	0.483871	Trpc1:chr9:95705086-95705371:-1, Trpc1:chr9:95705171-95705562:-1	Trpc1	NA	NA	FALSE	FALSE	0.463489	NA	FALSE
364	0.452112	NA	0.647059	0.48	0.167059	TRUE	0.686179	2 vs 1	0.334118	2 vs 1	0.294118	-0.04	Ttll3:chr6:113399120-113399437:1, Ttll3:chr6:113414248-113414591:1	Ttll3	NA	NA	FALSE	FALSE	0.452112	NA	FALSE
365	0.0290432	0.0788871	0.745098	0.614754	0.130344	TRUE	0.974118	3 vs 1	0.333655	3 vs 2	0.235294	-0.0983607	Arpc1b:chr5:145127611-145127772:1, Arpc1b:chr5:145127775-145127992:1, Arpc1b:chr5:145127764-145128199:1	Arpc1b	NA	NA	FALSE	FALSE	0.0788871	NA	FALSE
366	0.765087	NA	0.833333	0.666667	0.166667	TRUE	0.916291	1 vs 2	0.333333	1 vs 2	0.666667	0.333333	Asic2:chr11:80880163-80880479:-1, Asic2:chr11:80880163-80880725:-1	Asic2	NA	NA	FALSE	FALSE	0.765087	NA	FALSE
367	0.539615	NA	0.75	0.583333	0.166667	TRUE	0.76214	2 vs 1	0.333333	2 vs 1	0.5	0.166667	Gsap:chr5:21290789-21291214:1, Gsap:chr5:21291352-21291753:1	Gsap	NA	NA	FALSE	FALSE	0.539615	NA	FALSE
368	0.8841	NA	1	0.833333	0.166667	TRUE	Inf	2 vs 1	0.333333	2 vs 1	1	0.666667	Hoga1:chr19:42070496-42070969:1, Hoga1:chr19:42070651-42070989:1	Hoga1	NA	NA	FALSE	FALSE	0.8841	NA	FALSE
369	1	NA	0.583333	0.5	0.0833333	TRUE	Inf	3 vs 2	0.333333	3 vs 2	-0.666667	-1	Irf8:chr8:120754971-120755087:1, Irf8:chr8:120755327-120755566:1, Irf8:chr8:120756321-120756729:1	Irf8	NA	NA	FALSE	FALSE	1	NA	FALSE
370	1	NA	1	0.833333	0.166667	TRUE	Inf	2 vs 1	0.333333	2 vs 1	1	0.666667	Lhfpl5:chr17:28582814-28583171:1, Lhfpl5:chr17:28583248-28583581:1	Lhfpl5	NA	NA	FALSE	FALSE	1	NA	FALSE
371	1	NA	0.666667	0.5	0.166667	TRUE	0.693147	1 vs 2	0.333333	1 vs 2	0.333333	0	Lyz2:chr10:117277304-117277670:-1, Lyz2:chr10:117277321-117278036:-1	Lyz2	NA	NA	FALSE	FALSE	1	NA	FALSE
372	0.34899	NA	0.666667	0.5	0.166667	TRUE	0.753772	3 vs 1	0.333333	3 vs 1	0.333333	0	Stim1:chr7:102436436-102436875:1, Stim1:chr7:102436777-102437186:1, Stim1:chr7:102436975-102437319:1	Stim1	NA	NA	FALSE	FALSE	0.34899	NA	FALSE
373	0.975509	NA	0.666667	0.5	0.166667	TRUE	0.693147	1 vs 2	0.333333	1 vs 2	0.333333	0	Stox1:chr10:62659070-62659357:-1, Stox1:chr10:62659049-62659631:-1	Stox1	NA	NA	FALSE	FALSE	0.975509	NA	FALSE
374	0.00036794	0.000212479	0.606918	0.484496	0.122422	TRUE	1.55302	1 vs 3	0.333041	1 vs 3	0.367925	0.0348837	Katnal1:chr5:148871572-148871938:-1, Katnal1:chr5:148873741-148874028:-1, Katnal1:chr5:148874321-148874669:-1, Katnal1:chr5:148876060-148876411:-1	Katnal1	NA	NA	FALSE	FALSE	0.00036794	NA	FALSE
375	0.000982313	0.00273345	0.759494	0.593074	0.16642	FALSE	0.773219	1 vs 2	0.33284	1 vs 2	0.518987	0.186147	Ndst1:chr18:60684484-60684855:-1, Ndst1:chr18:60685967-60686332:-1	Ndst1	0.00490191	0.0131097	TRUE	TRUE	0.00273345	0.0143449	TRUE
376	0.00290446	0.869508	0.37	0.204082	0.165918	TRUE	0.902032	1 vs 3	0.331837	1 vs 3	-0.26	-0.591837	Klhl28:chr12:64938821-64939153:-1, Klhl28:chr12:64941102-64941482:-1, Klhl28:chr12:64943267-64943617:-1	Klhl28	NA	NA	FALSE	FALSE	0.869508	NA	FALSE
377	0.60041	NA	0.71875	0.654362	0.0643876	TRUE	Inf	1 vs 4	0.331795	2 vs 3	0.6875	0.355705	Ankrd12:chr17:65965705-65966031:-1, Ankrd12:chr17:65967458-65967862:-1, Ankrd12:chr17:65967982-65968542:-1, Ankrd12:chr17:65968935-65969099:-1, Ankrd12:chr17:65969061-65969474:-1	Ankrd12	NA	NA	FALSE	FALSE	0.60041	NA	FALSE
378	0.00781189	0.0130473	0.857143	0.814505	0.042638	FALSE	-1.54045	2 vs 1	0.331515	4 vs 3	0.482143	0.150628	Dffa:chr4:149117737-149118345:1, Dffa:chr4:149118307-149118707:1, Dffa:chr4:149118510-149118934:1, Dffa:chr4:149120071-149120686:1	Dffa	0.0299941	0.048245	TRUE	TRUE	0.0130473	0.053974	FALSE
379	5.03418e-05	0.000190477	0.796825	0.677184	0.119641	TRUE	0.883488	1 vs 2	0.331315	1 vs 2	0.520635	0.18932	Ginm1:chr10:7767938-7768272:-1, Ginm1:chr10:7791335-7791780:-1, Ginm1:chr10:7792466-7792592:-1	Ginm1	NA	NA	FALSE	FALSE	0.000190477	NA	FALSE
380	0.499393	NA	0.8125	0.647059	0.165441	TRUE	0.860201	1 vs 2	0.330882	1 vs 2	0.625	0.294118	8030462N17Rik:chr18:77631471-77631818:-1, 8030462N17Rik:chr18:77631675-77631938:-1	8030462N17Rik	NA	NA	FALSE	FALSE	0.499393	NA	FALSE
381	1	NA	1	0.834783	0.165217	TRUE	Inf	2 vs 1	0.330435	2 vs 1	1	0.669565	Kcnj3:chr2:55595530-55595948:1, Kcnj3:chr2:55597793-55598148:1	Kcnj3	NA	NA	FALSE	FALSE	1	NA	FALSE
382	0.684428	NA	0.833333	0.668394	0.16494	TRUE	0.908509	1 vs 2	0.329879	1 vs 2	0.666667	0.336788	Nrsn1:chr13:25252039-25252399:-1, Nrsn1:chr13:25252603-25253162:-1	Nrsn1	NA	NA	FALSE	FALSE	0.684428	NA	FALSE
383	0.293403	0.413333	0.470339	0.305556	0.164783	TRUE	1.04634	1 vs 3	0.329567	1 vs 3	-0.059322	-0.388889	Napepld:chr5:21662676-21663413:-1, Napepld:chr5:21662915-21663339:-1, Napepld:chr5:21664850-21665442:-1	Napepld	NA	NA	FALSE	FALSE	0.413333	NA	FALSE
384	0.234909	NA	0.15	0.111579	0.0384211	TRUE	#NAME?	1 vs 4	0.328947	4 vs 6	-0.25	-0.578947	Cacnb4:chr2:52428320-52428553:-1, Cacnb4:chr2:52428320-52428747:-1, Cacnb4:chr2:52428763-52428894:-1, Cacnb4:chr2:52430995-52431346:-1, Cacnb4:chr2:52433213-52433739:-1, Cacnb4:chr2:52434029-52434380:-1	Cacnb4	NA	NA	FALSE	FALSE	0.234909	NA	FALSE
385	0.174582	NA	0.42029	0.399123	0.021167	TRUE	1.0937	3 vs 4	0.328947	3 vs 4	0.5	0.171053	Gm5141:chr13:62771479-62771801:-1, Gm5141:chr13:62772182-62772576:-1, Gm5141:chr13:62772830-62773103:-1, Gm5141:chr13:62772735-62773308:-1	Gm5141	NA	NA	FALSE	FALSE	0.174582	NA	FALSE
386	0.368337	NA	1	0.835821	0.164179	TRUE	Inf	1 vs 2	0.328358	1 vs 2	1	0.671642	Ankrd44:chr1:54645334-54645674:-1, Ankrd44:chr1:54645345-54645943:-1	Ankrd44	NA	NA	FALSE	FALSE	0.368337	NA	FALSE
387	0.010583	NA	0.907692	0.74359	0.164103	TRUE	1.22107	1 vs 2	0.328205	1 vs 2	0.815385	0.487179	Fbxo45:chr16:32230107-32230459:-1, Fbxo45:chr16:32231550-32231990:-1	Fbxo45	NA	NA	FALSE	FALSE	0.010583	NA	FALSE
388	0.181416	0.297353	0.381188	0.305556	0.0756326	TRUE	0.81093	2 vs 3	0.327283	2 vs 3	0.049505	-0.277778	Gabra4:chr5:71569718-71570116:-1, Gabra4:chr5:71569745-71570355:-1, Gabra4:chr5:71571383-71571737:-1	Gabra4	NA	NA	FALSE	FALSE	0.297353	NA	FALSE
389	1.12057e-51	1.49991e-45	0.506831	0.401197	0.105635	FALSE	3.97327	14 vs 5	0.326671	10 vs 8	0.0778589	-0.248812	Gabbr1:chr17:37048485-37049226:1, Gabbr1:chr17:37048806-37048973:1, Gabbr1:chr17:37048858-37049570:1, Gabbr1:chr17:37049132-37049469:1, Gabbr1:chr17:37072789-37073179:1, Gabbr1:chr17:37073405-37074435:1, Gabbr1:chr17:37073817-37074277:1, Gabbr1:chr17:37073973-37074308:1, Gabbr1:chr17:37074789-37075118:1, Gabbr1:chr17:37078186-37078613:1, Gabbr1:chr17:37078727-37078960:1, Gabbr1:chr17:37080284-370…	Gabbr1	1.29375e-49	2.13693e-43	TRUE	TRUE	1.49991e-45	2.24105e-43	TRUE
390	0.293224	NA	0.642857	0.48	0.162857	TRUE	0.667829	1 vs 2	0.325714	1 vs 2	0.285714	-0.04	Bmpr1b:chr3:141837136-141837526:-1, Bmpr1b:chr3:141840347-141840686:-1	Bmpr1b	NA	NA	FALSE	FALSE	0.293224	NA	FALSE
391	0.794037	NA	0.411765	0.25	0.161765	TRUE	Inf	3 vs 1	0.323529	3 vs 1	-0.176471	-0.5	Vstm2a:chr11:16283296-16283972:1, Vstm2a:chr11:16283576-16283813:1, Vstm2a:chr11:16283836-16284199:1	Vstm2a	NA	NA	FALSE	FALSE	0.794037	NA	FALSE
392	0.00472476	0.010875	0.564444	0.52605	0.038394	TRUE	-2.19722	1 vs 2	0.323156	2 vs 3	-0.122222	-0.445378	Gm4631:chr2:175314011-175314363:-1, Gm4631:chr2:175315932-175316471:-1, Gm4631:chr2:175321865-175322180:-1, Gm4631:chr2:175322380-175322824:-1, Gm4631:chr2:175323204-175323453:-1, Gm4631:chr2:175323884-175324096:-1	Gm4631	NA	NA	FALSE	FALSE	0.010875	NA	FALSE
393	0.335548	NA	0.555556	0.46875	0.0868056	TRUE	2.42775	2 vs 4	0.322917	2 vs 4	0	-0.322917	Arfgef3:chr10:18581842-18582142:-1, Arfgef3:chr10:18581825-18582353:-1, Arfgef3:chr10:18584685-18584999:-1, Arfgef3:chr10:18588011-18588356:-1	Arfgef3	NA	NA	FALSE	FALSE	0.335548	NA	FALSE
394	0.0792701	NA	0.507692	0.346939	0.160754	TRUE	0.663294	2 vs 1	0.321507	2 vs 1	0.0153846	-0.306122	Rbbp8:chr18:11742555-11742840:1, Rbbp8:chr18:11742510-11743140:1	Rbbp8	NA	NA	FALSE	FALSE	0.0792701	NA	FALSE
395	0.0391567	0.00963668	0.625	0.46436	0.16064	TRUE	0.653627	2 vs 1	0.32128	2 vs 1	0.25	-0.0712797	Cnr1:chr4:33944708-33945054:1, Cnr1:chr4:33948467-33948831:1	Cnr1	NA	NA	FALSE	FALSE	0.0391567	NA	FALSE
396	4.48549e-37	4.27136e-30	0.552464	0.391861	0.160602	FALSE	0.650124	2 vs 1	0.321204	2 vs 1	0.104927	-0.216277	Polr1d:chr5:147078712-147079102:1, Polr1d:chr5:147110995-147111366:1	Polr1d	2.42407e-35	2.20111e-28	TRUE	TRUE	4.27136e-30	2.30835e-28	TRUE
397	0.301788	NA	0.347826	0.1875	0.160326	TRUE	0.837728	2 vs 1	0.320652	2 vs 1	-0.304348	-0.625	Spaca6:chr17:17838582-17839249:1, Spaca6:chr17:17842652-17843010:1	Spaca6	NA	NA	FALSE	FALSE	0.301788	NA	FALSE
398	0.35419	NA	0.875	0.793478	0.0815217	TRUE	0.898899	1 vs 2	0.320652	1 vs 2	0.625	0.304348	Zhx3:chr2:160765716-160766162:-1, Zhx3:chr2:160768678-160769093:-1, Zhx3:chr2:160771254-160771588:-1	Zhx3	NA	NA	FALSE	FALSE	0.35419	NA	FALSE
399	0.904556	NA	0.75	0.59	0.16	TRUE	0.734647	1 vs 2	0.32	1 vs 2	0.5	0.18	Kctd8:chr5:69109375-69109775:-1, Kctd8:chr5:69109729-69110261:-1	Kctd8	NA	NA	FALSE	FALSE	0.904556	NA	FALSE
400	0.284722	NA	0.43	0.373333	0.0566667	TRUE	1.442	3 vs 1	0.32	3 vs 1	0.04	-0.28	Slc38a9:chr13:112731439-112731731:1, Slc38a9:chr13:112731742-112732113:1, Slc38a9:chr13:112734682-112735098:1, Slc38a9:chr13:112738178-112738752:1, Slc38a9:chr13:112738425-112738752:1	Slc38a9	NA	NA	FALSE	FALSE	0.284722	NA	FALSE
401	0.101149	NA	0.651515	0.491803	0.159712	TRUE	0.658496	2 vs 1	0.319424	2 vs 1	0.30303	-0.0163934	Mier3:chr13:111717200-111717747:1, Mier3:chr13:111718199-111718615:1	Mier3	NA	NA	FALSE	FALSE	0.101149	NA	FALSE
402	0.0958697	NA	0.458333	0.298851	0.159483	TRUE	0.685723	1 vs 2	0.318966	1 vs 2	-0.0833333	-0.402299	Frs2:chr10:117069417-117069741:-1, Frs2:chr10:117070034-117070521:-1	Frs2	NA	NA	FALSE	FALSE	0.0958697	NA	FALSE
403	0.352631	NA	0.595238	0.436364	0.158874	TRUE	0.855666	1 vs 3	0.317749	1 vs 3	0.190476	-0.127273	Zfp729a:chr13:67612822-67613118:-1, Zfp729a:chr13:67616961-67617397:-1, Zfp729a:chr13:67618081-67618366:-1	Zfp729a	NA	NA	FALSE	FALSE	0.352631	NA	FALSE
404	0.251779	0.626968	0.846154	0.6875	0.158654	TRUE	1.06171	1 vs 3	0.317308	1 vs 3	0.692308	0.375	Zbtb38:chr9:96682712-96683153:-1, Zbtb38:chr9:96682973-96683280:-1, Zbtb38:chr9:96683619-96684132:-1	Zbtb38	NA	NA	FALSE	FALSE	0.626968	NA	FALSE
405	0.600163	NA	0.625	0.466667	0.158333	TRUE	0.644357	2 vs 1	0.316667	2 vs 1	0.25	-0.0666667	Slc43a3:chr2:84957551-84958000:1, Slc43a3:chr2:84958065-84958519:1	Slc43a3	NA	NA	FALSE	FALSE	0.600163	NA	FALSE
406	0.281585	NA	0.5	0.368421	0.131579	TRUE	0.916291	2 vs 3	0.315789	2 vs 3	0	-0.315789	Wipi1:chr11:109573327-109573634:-1, Wipi1:chr11:109573378-109573924:-1, Wipi1:chr11:109575160-109575401:-1	Wipi1	NA	NA	FALSE	FALSE	0.281585	NA	FALSE
407	0.0239305	0.0553179	0.743548	0.655844	0.0877042	TRUE	-1.38629	3 vs 4	0.315291	1 vs 3	0.445161	0.12987	Pkn2:chr3:142791493-142791863:-1, Pkn2:chr3:142791512-142792591:-1, Pkn2:chr3:142792049-142792340:-1, Pkn2:chr3:142793235-142794097:-1, Pkn2:chr3:142793519-142793866:-1	Pkn2	NA	NA	FALSE	FALSE	0.0553179	NA	FALSE
408	0.433849	NA	0.309524	0.152174	0.15735	TRUE	0.998529	1 vs 3	0.3147	1 vs 3	-0.380952	-0.695652	Ehd4:chr2:120089460-120089819:-1, Ehd4:chr2:120090246-120090800:-1, Ehd4:chr2:120090883-120091284:-1	Ehd4	NA	NA	FALSE	FALSE	0.433849	NA	FALSE
409	0.552994	NA	0.557143	0.4	0.157143	TRUE	0.63504	1 vs 2	0.314286	1 vs 2	0.114286	-0.2	Hus1:chr11:8993136-8993525:-1, Hus1:chr11:8995681-8996017:-1	Hus1	NA	NA	FALSE	FALSE	0.552994	NA	FALSE
410	0.484019	0.835842	0.472222	0.387387	0.0848348	TRUE	0.704631	3 vs 1	0.314189	3 vs 1	0.25	-0.0641892	Cdh13:chr8:119322937-119323121:1, Cdh13:chr8:119323077-119323586:1, Cdh13:chr8:119324151-119324474:1, Cdh13:chr8:119324544-119324948:1	Cdh13	NA	NA	FALSE	FALSE	0.835842	NA	FALSE
411	0.231268	NA	0.62069	0.463768	0.156922	TRUE	0.637658	1 vs 2	0.313843	1 vs 2	0.241379	-0.0724638	Ankrd61:chr5:143890658-143890897:-1, Ankrd61:chr5:143890582-143891115:-1	Ankrd61	NA	NA	FALSE	FALSE	0.231268	NA	FALSE
412	0.0527174	0.232426	0.323529	0.25	0.0735294	TRUE	0.825029	2 vs 3	0.313833	2 vs 3	-0.109244	-0.423077	Cep76:chr18:67616950-67617284:-1, Cep76:chr18:67617753-67618176:-1, Cep76:chr18:67618930-67619383:-1	Cep76	NA	NA	FALSE	FALSE	0.232426	NA	FALSE
413	0.881808	NA	0.555556	0.380952	0.174603	TRUE	#NAME?	2 vs 1	0.313665	4 vs 1	0	-0.313665	Gria1:chr11:57327402-57327804:1, Gria1:chr11:57327696-57328001:1, Gria1:chr11:57329759-57330017:1, Gria1:chr11:57329522-57330265:1	Gria1	NA	NA	FALSE	FALSE	0.881808	NA	FALSE
414	0.0340548	0.0486485	0.685897	0.526171	0.159727	TRUE	1.62924	1 vs 4	0.313414	1 vs 4	0.230769	-0.0826446	Zfp334:chr2:165374264-165374575:-1, Zfp334:chr2:165377392-165377779:-1, Zfp334:chr2:165377436-165378003:-1, Zfp334:chr2:165378643-165379247:-1	Zfp334	NA	NA	FALSE	FALSE	0.0486485	NA	FALSE
415	3.57451e-17	2.4899e-15	0.190476	0.0338295	0.156647	FALSE	1.90509	2 vs 1	0.313293	2 vs 1	-0.619048	-0.932341	Tacc2:chr7:130764344-130764772:1, Tacc2:chr7:130767293-130767589:1	Tacc2	9.26454e-16	6.28181e-14	TRUE	TRUE	2.4899e-15	6.72802e-14	TRUE
416	0.00424738	NA	0.429348	0.272727	0.156621	TRUE	2.70002	3 vs 1	0.313241	3 vs 1	-0.141304	-0.454545	Etv6:chr6:134266477-134266762:1, Etv6:chr6:134269611-134270125:1, Etv6:chr6:134269880-134270153:1	Etv6	NA	NA	FALSE	FALSE	0.00424738	NA	FALSE
417	0.0784097	NA	0.797872	0.675	0.122872	TRUE	1.97716	2 vs 1	0.312766	2 vs 1	0.212766	-0.1	Shc1:chr3:89429279-89429661:1, Shc1:chr3:89429512-89429999:1, Shc1:chr3:89429721-89430029:1	Shc1	NA	NA	FALSE	FALSE	0.0784097	NA	FALSE
418	0.00436645	0.0072881	0.450549	0.294224	0.156326	TRUE	0.676506	2 vs 1	0.312651	2 vs 1	-0.0989011	-0.411552	Ttl:chr2:129093365-129093753:1, Ttl:chr2:129095905-129096287:1	Ttl	NA	NA	FALSE	FALSE	0.0072881	NA	FALSE
419	0.155169	NA	0.572727	0.415267	0.15746	TRUE	2.05412	5 vs 2	0.312283	5 vs 2	0.0909091	-0.221374	Pcdh7:chr5:57729156-57729448:1, Pcdh7:chr5:57731048-57731859:1, Pcdh7:chr5:57913086-57913525:1, Pcdh7:chr5:58129467-58129824:1, Pcdh7:chr5:58132795-58133216:1, Pcdh7:chr5:58132937-58133254:1	Pcdh7	NA	NA	FALSE	FALSE	0.155169	NA	FALSE
420	0.000118147	0.00237141	0.4	0.48	-0.08	TRUE	Inf	1 vs 3	0.31219	5 vs 6	-0.0238095	-0.336	Tmf1:chr6:97151932-97152210:-1, Tmf1:chr6:97152805-97153520:-1, Tmf1:chr6:97153147-97153520:-1, Tmf1:chr6:97153513-97153854:-1, Tmf1:chr6:97154416-97154872:-1, Tmf1:chr6:97155250-97155575:-1	Tmf1	NA	NA	FALSE	FALSE	0.00237141	NA	FALSE
421	0.248466	NA	0.854167	0.698113	0.156053	TRUE	1.28988	3 vs 1	0.312107	3 vs 1	0.708333	0.396226	Cfap97:chr8:46192633-46193030:1, Cfap97:chr8:46194946-46195590:1, Cfap97:chr8:46195196-46195590:1	Cfap97	NA	NA	FALSE	FALSE	0.248466	NA	FALSE
422	0.0451771	0.251461	0.475	0.40873	0.0662698	TRUE	-1.01693	4 vs 3	0.311905	3 vs 1	0.3	-0.0119048	Zfp318:chr17:46413382-46413974:1, Zfp318:chr17:46413768-46414077:1, Zfp318:chr17:46414337-46414833:1, Zfp318:chr17:46420566-46420891:1	Zfp318	NA	NA	FALSE	FALSE	0.251461	NA	FALSE
423	0.0104112	0.0150018	0.682889	0.527027	0.155862	TRUE	0.658865	2 vs 1	0.311723	2 vs 1	0.365777	0.0540541	Psrc1:chr3:108387535-108387922:1, Psrc1:chr3:108387796-108388197:1	Psrc1	NA	NA	FALSE	FALSE	0.0150018	NA	FALSE
424	0.0282115	NA	0.847222	0.691589	0.155633	TRUE	0.905421	2 vs 1	0.311267	2 vs 1	0.694444	0.383178	Ankzf1:chr1:75195216-75195561:1, Ankzf1:chr1:75199023-75199406:1	Ankzf1	NA	NA	FALSE	FALSE	0.0282115	NA	FALSE
425	0.296325	NA	0.633333	0.477778	0.155556	TRUE	#NAME?	2 vs 1	0.311111	3 vs 1	0.266667	-0.0444444	Zfp809:chr9:22238920-22239509:1, Zfp809:chr9:22239425-22239598:1, Zfp809:chr9:22242994-22243354:1	Zfp809	NA	NA	FALSE	FALSE	0.296325	NA	FALSE
426	9.85992e-09	4.37152e-08	0.919732	0.788401	0.131331	FALSE	1.6211	1 vs 2	0.310942	1 vs 2	0.859532	0.548589	Ptpn2:chr18:67665495-67665878:-1, Ptpn2:chr18:67671194-67671555:-1, Ptpn2:chr18:67671934-67672376:-1	Ptpn2	1.27128e-07	5.75425e-07	TRUE	TRUE	4.37152e-08	6.06758e-07	TRUE
427	0.0971376	NA	0.259259	0.103896	0.155363	TRUE	1.10484	2 vs 1	0.310726	2 vs 1	-0.481481	-0.792208	Ldlrad4:chr18:68254315-68254676:1, Ldlrad4:chr18:68254574-68254989:1	Ldlrad4	NA	NA	FALSE	FALSE	0.0971376	NA	FALSE
428	0.813824	NA	0.75	0.62069	0.12931	TRUE	Inf	1 vs 3	0.310345	1 vs 2	0	-0.310345	Adora1:chr1:134199215-134199566:-1, Adora1:chr1:134201391-134201715:-1, Adora1:chr1:134201575-134201845:-1	Adora1	NA	NA	FALSE	FALSE	0.813824	NA	FALSE
429	0.00303554	0.0124746	0.859903	0.707672	0.152231	FALSE	1.17123	4 vs 1	0.310041	4 vs 1	0.702899	0.392857	Sun1:chr5:139227950-139228306:1, Sun1:chr5:139228081-139228318:1, Sun1:chr5:139249121-139249840:1, Sun1:chr5:139249459-139249826:1	Sun1	0.0133396	0.046554	TRUE	TRUE	0.0124746	0.0521144	FALSE
430	1.57329e-41	1.3025e-35	0.476791	0.461242	0.0155493	FALSE	0.983953	3 vs 2	0.309816	3 vs 2	-0.228557	-0.538373	Mpped2:chr2:106866873-106867233:1, Mpped2:chr2:106867088-106867409:1, Mpped2:chr2:106867958-106868360:1	Mpped2	1.02465e-39	9.55957e-34	TRUE	TRUE	1.3025e-35	1.00253e-33	TRUE
431	3.84705e-06	4.27053e-07	0.94357	0.838652	0.104917	FALSE	1.75052	3 vs 2	0.309223	4 vs 2	0.846457	0.537234	Triobp:chr15:78971763-78971964:1, Triobp:chr15:78971857-78972242:1, Triobp:chr15:79005115-79005869:1, Triobp:chr15:79005489-79005869:1	Triobp	3.25717e-05	4.65911e-06	TRUE	TRUE	3.84705e-06	3.80214e-05	TRUE
432	0.564475	NA	0.369048	0.351632	0.0174156	TRUE	#NAME?	6 vs 1	0.309029	4 vs 1	0.142857	-0.166172	Camk4:chr18:33184924-33185410:1, Camk4:chr18:33185901-33186482:1, Camk4:chr18:33190519-33191406:1, Camk4:chr18:33190876-33191191:1, Camk4:chr18:33193261-33193559:1, Camk4:chr18:33195233-33195767:1, Camk4:chr18:33195467-33195767:1	Camk4	NA	NA	FALSE	FALSE	0.564475	NA	FALSE
433	5.42665e-05	8.63801e-05	0.33945	0.223704	0.115746	TRUE	1.74469	3 vs 4	0.308583	2 vs 4	-0.366972	-0.675556	Txlng:chrX:162778914-162779297:-1, Txlng:chrX:162788772-162789214:-1, Txlng:chrX:162788810-162789404:-1, Txlng:chrX:162790522-162790866:-1	Txlng	NA	NA	FALSE	FALSE	8.63801e-05	NA	FALSE
434	0.130523	NA	0.527273	0.293023	0.234249	TRUE	1.79176	6 vs 2	0.307259	6 vs 2	0.121212	-0.186047	Tmem260:chr14:48447911-48448375:1, Tmem260:chr14:48448274-48448559:1, Tmem260:chr14:48512133-48512914:1, Tmem260:chr14:48512509-48512750:1, Tmem260:chr14:48512589-48512911:1, Tmem260:chr14:48514814-48515250:1	Tmem260	NA	NA	FALSE	FALSE	0.130523	NA	FALSE
435	0.018728	0.0138256	0.638158	0.648289	-0.0101311	TRUE	#NAME?	4 vs 1	0.305884	9 vs 8	0.184211	-0.121673	Sh3bgrl2:chr9:83597259-83597614:1, Sh3bgrl2:chr9:83597607-83597701:1, Sh3bgrl2:chr9:83597621-83597791:1, Sh3bgrl2:chr9:83597591-83598005:1, Sh3bgrl2:chr9:83597784-83598198:1, Sh3bgrl2:chr9:83599562-83600311:1, Sh3bgrl2:chr9:83599913-83600296:1, Sh3bgrl2:chr9:83600966-83601392:1, Sh3bgrl2:chr9:83603023-83603086:1	Sh3bgrl2	NA	NA	FALSE	FALSE	0.018728	NA	FALSE
436	0.00539623	0.0463776	0.847458	0.694805	0.152652	TRUE	0.892117	1 vs 2	0.305305	1 vs 2	0.694915	0.38961	Tmem201:chr4:149715374-149715721:-1, Tmem201:chr4:149724809-149725220:-1	Tmem201	NA	NA	FALSE	FALSE	0.0463776	NA	FALSE
437	0.0452387	0.0992146	0.661364	0.565517	0.0958464	TRUE	Inf	3 vs 1	0.303422	5 vs 1	0.268939	-0.0344828	Gca:chr2:62691522-62691719:1, Gca:chr2:62691561-62691980:1, Gca:chr2:62691853-62692101:1, Gca:chr2:62693103-62693317:1, Gca:chr2:62693223-62693470:1, Gca:chr2:62693555-62694025:1	Gca	NA	NA	FALSE	FALSE	0.0992146	NA	FALSE
438	0.792647	NA	0.5	0.368852	0.131148	TRUE	#NAME?	2 vs 1	0.303279	3 vs 2	0.5	0.196721	Gabrb2:chr11:42630377-42630678:1, Gabrb2:chr11:42632007-42632591:1, Gabrb2:chr11:42632274-42632568:1	Gabrb2	NA	NA	FALSE	FALSE	0.792647	NA	FALSE
439	0.623062	NA	0.818182	0.666667	0.151515	TRUE	0.81093	1 vs 2	0.30303	1 vs 2	0.636364	0.333333	Abca5:chr11:110269365-110269697:-1, Abca5:chr11:110272184-110272609:-1	Abca5	NA	NA	FALSE	FALSE	0.623062	NA	FALSE
440	0.915923	NA	0.818182	0.666667	0.151515	TRUE	0.81093	1 vs 2	0.30303	1 vs 2	0.636364	0.333333	Enkur:chr2:21180714-21181028:-1, Enkur:chr2:21180836-21181155:-1	Enkur	NA	NA	FALSE	FALSE	0.915923	NA	FALSE
441	0.67011	0.822091	0.625	0.477401	0.147599	TRUE	1.01523	4 vs 1	0.302966	4 vs 2	0.125	-0.177966	Plppr5:chr3:117686586-117687014:1, Plppr5:chr3:117686962-117687384:1, Plppr5:chr3:117687454-117687941:1, Plppr5:chr3:117689147-117689508:1	Plppr5	NA	NA	FALSE	FALSE	0.822091	NA	FALSE
442	1.08287e-09	1.9804e-09	0.336	0.316802	0.0191984	FALSE	1.67398	2 vs 6	0.302952	5 vs 6	0.541818	0.238866	Ube2w:chr1:16569353-16569795:-1, Ube2w:chr1:16569944-16570751:-1, Ube2w:chr1:16569540-16570190:-1, Ube2w:chr1:16570652-16571044:-1, Ube2w:chr1:16570135-16570474:-1, Ube2w:chr1:16570525-16570877:-1	Ube2w	1.54522e-08	3.11464e-08	TRUE	TRUE	1.9804e-09	3.26638e-08	TRUE
443	0.130958	0.0981057	0.483871	0.332461	0.15141	TRUE	0.632538	1 vs 2	0.30282	1 vs 2	-0.0322581	-0.335079	Rgs17:chr10:5832202-5832625:-1, Rgs17:chr10:5832934-5833220:-1	Rgs17	NA	NA	FALSE	FALSE	0.130958	NA	FALSE
444	2.72873e-28	1.29299e-25	0.336803	0.253185	0.0836179	FALSE	1.14157	5 vs 1	0.30261	3 vs 1	0.0743494	-0.228261	Gsk3b:chr16:38240463-38240602:1, Gsk3b:chr16:38240266-38241169:1, Gsk3b:chr16:38240805-38241140:1, Gsk3b:chr16:38243552-38244112:1, Gsk3b:chr16:38245077-38245510:1, Gsk3b:chr16:38245727-38246084:1	Gsk3b	1.21596e-26	5.39934e-24	TRUE	TRUE	1.29299e-25	5.86463e-24	TRUE
445	0.126368	0.227952	0.266667	0.107372	0.159295	TRUE	#NAME?	2 vs 1	0.302564	4 vs 1	-0.466667	-0.769231	Plcxd3:chr15:4575276-4575544:1, Plcxd3:chr15:4575381-4575894:1, Plcxd3:chr15:4580787-4580954:1, Plcxd3:chr15:4580871-4581459:1	Plcxd3	NA	NA	FALSE	FALSE	0.227952	NA	FALSE
446	0.0343491	NA	0.452632	0.301724	0.150907	TRUE	0.649057	4 vs 1	0.301815	4 vs 1	-0.0947368	-0.396552	Tmem38b:chr4:53860203-53860610:1, Tmem38b:chr4:53861454-53861822:1, Tmem38b:chr4:53861630-53861850:1, Tmem38b:chr4:53861686-53862026:1	Tmem38b	NA	NA	FALSE	FALSE	0.0343491	NA	FALSE
447	0.0556369	NA	0.616279	0.567391	0.0488878	TRUE	-0.93282	2 vs 3	0.300506	1 vs 2	-0.325581	-0.626087	Srl:chr16:4476924-4477352:-1, Srl:chr16:4480187-4480563:-1, Srl:chr16:4481979-4482304:-1	Srl	NA	NA	FALSE	FALSE	0.0556369	NA	FALSE
448	0.529651	NA	0.9	0.75	0.15	TRUE	1.09861	1 vs 2	0.3	1 vs 2	0.8	0.5	C2cd2:chr16:97858722-97859091:-1, C2cd2:chr16:97858919-97859374:-1	C2cd2	NA	NA	FALSE	FALSE	0.529651	NA	FALSE
449	0.421446	0.398838	0.322222	0.155556	0.166667	TRUE	Inf	4 vs 1	0.3	4 vs 1	-0.366667	-0.666667	Usp2:chr9:44093572-44093995:1, Usp2:chr9:44094942-44095316:1, Usp2:chr9:44095261-44095598:1, Usp2:chr9:44095404-44095627:1	Usp2	NA	NA	FALSE	FALSE	0.421446	NA	FALSE
450	0.304076	0.574989	0.45	0.35	0.1	TRUE	1.38629	3 vs 1	0.3	2 vs 1	0.6	0.3	Usp45:chr4:21834056-21834690:1, Usp45:chr4:21837461-21837874:1, Usp45:chr4:21837172-21838126:1	Usp45	NA	NA	FALSE	FALSE	0.574989	NA	FALSE
451	0.375647	NA	0.941176	0.791667	0.14951	TRUE	1.43759	1 vs 2	0.29902	1 vs 2	0.882353	0.583333	Cep350:chr1:155844964-155845302:-1, Cep350:chr1:155844993-155845623:-1	Cep350	NA	NA	FALSE	FALSE	0.375647	NA	FALSE
452	0.0534032	0.115175	0.6	0.485981	0.114019	TRUE	2.05573	5 vs 2	0.298413	5 vs 2	0.139535	-0.158879	AU041133:chr10:82151974-82152083:1, AU041133:chr10:82152040-82152656:1, AU041133:chr10:82152688-82153040:1, AU041133:chr10:82152544-82153033:1, AU041133:chr10:82152910-82153362:1, AU041133:chr10:82153175-82153541:1	AU041133	NA	NA	FALSE	FALSE	0.115175	NA	FALSE
453	0.00112676	0.00345992	0.791628	0.690655	0.100973	FALSE	0.686752	1 vs 4	0.297959	1 vs 4	0.4	0.102041	Efnb2:chr8:8617396-8617795:-1, Efnb2:chr8:8617215-8618063:-1, Efnb2:chr8:8617768-8617974:-1, Efnb2:chr8:8617567-8618309:-1, Efnb2:chr8:8618907-8619471:-1, Efnb2:chr8:8619096-8619616:-1	Efnb2	0.00553571	0.0160843	TRUE	TRUE	0.00345992	0.0176116	TRUE
454	0.133466	NA	0.471429	0.358974	0.112454	TRUE	2.19722	1 vs 4	0.297802	1 vs 3	-0.471429	-0.769231	Iqsec1:chr6:90656132-90656383:-1, Iqsec1:chr6:90659568-90659954:-1, Iqsec1:chr6:90660335-90660718:-1, Iqsec1:chr6:90662100-90662530:-1	Iqsec1	NA	NA	FALSE	FALSE	0.133466	NA	FALSE
455	0.371102	NA	0.5625	0.413636	0.148864	TRUE	0.954031	3 vs 1	0.297727	3 vs 1	0.125	-0.172727	Retreg1:chr15:25971730-25972148:1, Retreg1:chr15:25972006-25972317:1, Retreg1:chr15:25973241-25973732:1	Retreg1	NA	NA	FALSE	FALSE	0.371102	NA	FALSE
456	0.555079	NA	0.736842	0.588235	0.148607	TRUE	0.672944	1 vs 2	0.297214	1 vs 2	0.473684	0.176471	Rffl:chr11:82803791-82804141:-1, Rffl:chr11:82805575-82805934:-1	Rffl	NA	NA	FALSE	FALSE	0.555079	NA	FALSE
457	0.0394902	NA	0.863636	0.79703	0.0666067	TRUE	1.52606	1 vs 2	0.29667	1 vs 2	0.781818	0.485149	Zfp799:chr17:32817155-32817693:-1, Zfp799:chr17:32818591-32819138:-1, Zfp799:chr17:32820914-32821166:-1	Zfp799	NA	NA	FALSE	FALSE	0.0394902	NA	FALSE
458	0.0958603	NA	0.782511	0.675926	0.106585	TRUE	-1.75402	2 vs 1	0.295632	5 vs 2	0.591928	0.296296	Sema5a:chr15:32690006-32690361:1, Sema5a:chr15:32690223-32690524:1, Sema5a:chr15:32692297-32692699:1, Sema5a:chr15:32695733-32696341:1, Sema5a:chr15:32695945-32696341:1	Sema5a	NA	NA	FALSE	FALSE	0.0958603	NA	FALSE
459	0.6308	NA	0.7	0.552632	0.147368	TRUE	0.635989	2 vs 1	0.294737	2 vs 1	0.4	0.105263	Slc36a1:chr11:55235707-55236334:1, Slc36a1:chr11:55236022-55236334:1	Slc36a1	NA	NA	FALSE	FALSE	0.6308	NA	FALSE
460	0.0776106	0.220137	0.569231	0.422018	0.147212	TRUE	0.965081	3 vs 2	0.294425	3 vs 1	0.138462	-0.155963	Etv3:chr3:87530658-87531048:1, Etv3:chr3:87539142-87539662:1, Etv3:chr3:87539753-87540165:1	Etv3	NA	NA	FALSE	FALSE	0.220137	NA	FALSE
461	0.158608	NA	0.484848	0.465116	0.0197322	TRUE	1.47331	3 vs 4	0.293869	3 vs 4	0.363636	0.0697674	Atxn1l:chr8:109726451-109726633:-1, Atxn1l:chr8:109726455-109726823:-1, Atxn1l:chr8:109726642-109726977:-1, Atxn1l:chr8:109731061-109731473:-1	Atxn1l	NA	NA	FALSE	FALSE	0.158608	NA	FALSE
462	3.84637e-05	0.000124768	0.78012	0.633238	0.146883	FALSE	0.720236	2 vs 1	0.293765	2 vs 1	0.560241	0.266476	Tceal3:chrX:136667759-136668306:1, Tceal3:chrX:136668068-136668378:1	Tceal3	0.000270631	0.000856058	TRUE	TRUE	0.000124768	0.000915928	TRUE
463	0.208931	0.24156	0.527778	0.376701	0.151077	TRUE	Inf	1 vs 6	0.292517	2 vs 7	0.0833333	-0.209184	Cbfa2t3:chr8:122625144-122625451:-1, Cbfa2t3:chr8:122628727-122629066:-1, Cbfa2t3:chr8:122628829-122629272:-1, Cbfa2t3:chr8:122629245-122629525:-1, Cbfa2t3:chr8:122629315-122629795:-1, Cbfa2t3:chr8:122629652-122629983:-1, Cbfa2t3:chr8:122629965-122630357:-1	Cbfa2t3	NA	NA	FALSE	FALSE	0.24156	NA	FALSE
464	0.950045	NA	0.895833	0.75	0.145833	TRUE	1.05315	1 vs 2	0.291667	1 vs 2	0.791667	0.5	Gypc:chr18:32528310-32528652:-1, Gypc:chr18:32528443-32528798:-1	Gypc	NA	NA	FALSE	FALSE	0.950045	NA	FALSE
465	0.152612	NA	0.846154	0.833333	0.0128205	TRUE	Inf	1 vs 3	0.290148	2 vs 3	0.307692	0.0175439	2310034G01Rik:chr19:46348210-46348535:-1, 2310034G01Rik:chr19:46348247-46348749:-1, 2310034G01Rik:chr19:46348519-46348813:-1	2310034G01Rik	NA	NA	FALSE	FALSE	0.152612	NA	FALSE
466	0.049593	0.0866108	0.686869	0.601504	0.0853649	TRUE	0.741937	3 vs 1	0.289967	3 vs 2	-0.10101	-0.390977	Zfp965:chr2:175478280-175478491:1, Zfp965:chr2:175478873-175479391:1, Zfp965:chr2:175485482-175485848:1	Zfp965	NA	NA	FALSE	FALSE	0.0866108	NA	FALSE
467	0.181775	NA	0.385714	0.346154	0.0395604	TRUE	1.14513	3 vs 2	0.288462	3 vs 2	0	-0.288462	Dstyk:chr1:132465571-132465890:1, Dstyk:chr1:132466388-132466671:1, Dstyk:chr1:132466183-132466894:1	Dstyk	NA	NA	FALSE	FALSE	0.181775	NA	FALSE
468	0.305858	NA	0.836466	0.692308	0.144158	TRUE	0.960308	1 vs 3	0.288317	1 vs 3	0.672932	0.384615	Notch1:chr2:26457902-26458387:-1, Notch1:chr2:26459174-26459433:-1, Notch1:chr2:26459138-26459615:-1	Notch1	NA	NA	FALSE	FALSE	0.305858	NA	FALSE
469	0.593309	NA	0.666667	0.648649	0.018018	TRUE	Inf	2 vs 1	0.288288	2 vs 1	0.666667	0.378378	Pnpla3:chr15:84188553-84188865:1, Pnpla3:chr15:84188759-84189113:1, Pnpla3:chr15:84189093-84189521:1	Pnpla3	NA	NA	FALSE	FALSE	0.593309	NA	FALSE
470	0.560946	NA	0.916667	0.772727	0.143939	TRUE	1.17412	2 vs 1	0.287879	2 vs 1	0.833333	0.545455	Slc25a47:chr12:108856311-108856734:1, Slc25a47:chr12:108856468-108856815:1	Slc25a47	NA	NA	FALSE	FALSE	0.560946	NA	FALSE
471	0.663488	0.821044	0.5	0.427912	0.0720884	TRUE	Inf	1 vs 4	0.286637	3 vs 7	0.181818	-0.104819	Arpp21:chr9:112065231-112065540:-1, Arpp21:chr9:112065197-112065778:-1, Arpp21:chr9:112159921-112160366:-1, Arpp21:chr9:112159819-112160628:-1, Arpp21:chr9:112180019-112180376:-1, Arpp21:chr9:112180875-112181444:-1, Arpp21:chr9:112182766-112183103:-1	Arpp21	NA	NA	FALSE	FALSE	0.821044	NA	FALSE
472	2.70254e-05	0.000227676	0.350515	0.207237	0.143279	FALSE	0.724888	2 vs 1	0.286557	2 vs 1	-0.298969	-0.585526	Mlx:chr11:101091128-101091585:1, Mlx:chr11:101091824-101092236:1	Mlx	0.000197823	0.00147049	TRUE	TRUE	0.000227676	0.00157146	TRUE
473	0.102172	NA	0.243184	0.1	0.143184	TRUE	#NAME?	1 vs 2	0.286368	1 vs 3	-0.513632	-0.8	Ccnb1:chr13:100778683-100779120:-1, Ccnb1:chr13:100779104-100779635:-1, Ccnb1:chr13:100779585-100779874:-1	Ccnb1	NA	NA	FALSE	FALSE	0.102172	NA	FALSE
474	0.354072	NA	0.526316	0.41875	0.107566	TRUE	0.980829	1 vs 3	0.286184	2 vs 3	0.473684	0.1875	Camk1d:chr2:5293457-5293770:-1, Camk1d:chr2:5293678-5294062:-1, Camk1d:chr2:5298551-5299066:-1	Camk1d	NA	NA	FALSE	FALSE	0.354072	NA	FALSE
475	0.0322366	0.0558029	0.693878	0.597015	0.0968626	TRUE	1.07044	3 vs 1	0.286019	3 vs 2	-0.102041	-0.38806	Zfp973:chr2:176678817-176679030:1, Zfp973:chr2:176679410-176679928:1, Zfp973:chr2:176686019-176686385:1	Zfp973	NA	NA	FALSE	FALSE	0.0558029	NA	FALSE
476	0.0457293	0.032473	0.728938	0.62931	0.0996274	TRUE	-0.887303	3 vs 2	0.285904	4 vs 3	0.406593	0.12069	Zfp971:chr2:178032260-178032495:1, Zfp971:chr2:178032073-178032691:1, Zfp971:chr2:178032367-178032631:1, Zfp971:chr2:178038444-178038771:1	Zfp971	NA	NA	FALSE	FALSE	0.0457293	NA	FALSE
477	1	NA	1	0.857143	0.142857	TRUE	Inf	1 vs 2	0.285714	1 vs 2	1	0.714286	B3gnt9:chr8:105252638-105252998:-1, B3gnt9:chr8:105252950-105253112:-1	B3gnt9	NA	NA	FALSE	FALSE	1	NA	FALSE
478	0.791547	NA	0.642857	0.571429	0.0714286	TRUE	0.693147	3 vs 2	0.285714	3 vs 2	0	-0.285714	Phospho1:chr11:95831358-95832064:1, Phospho1:chr11:95831840-95832058:1, Phospho1:chr11:95831944-95832140:1	Phospho1	NA	NA	FALSE	FALSE	0.791547	NA	FALSE
479	1	NA	1	0.857143	0.142857	TRUE	Inf	1 vs 2	0.285714	1 vs 2	1	0.714286	Slc25a42:chr8:70184322-70184623:-1, Slc25a42:chr8:70184487-70184653:-1	Slc25a42	NA	NA	FALSE	FALSE	1	NA	FALSE
480	0.0544425	NA	0.59596	0.55144	0.0445193	TRUE	#NAME?	2 vs 1	0.285634	8 vs 2	0.242424	-0.0432099	Crim1:chr17:78374005-78374236:1, Crim1:chr17:78374167-78374594:1, Crim1:chr17:78375028-78375308:1, Crim1:chr17:78375575-78375786:1, Crim1:chr17:78375695-78376119:1, Crim1:chr17:78375872-78376209:1, Crim1:chr17:78376029-78376298:1, Crim1:chr17:78376171-78376529:1, Crim1:chr17:78376380-78376456:1, Crim1:chr17:78376342-78376583:1	Crim1	NA	NA	FALSE	FALSE	0.0544425	NA	FALSE
481	0.0336813	NA	0.745833	0.641509	0.104324	TRUE	1.8579	4 vs 2	0.285613	4 vs 2	0.5875	0.301887	Atl3:chr19:7533875-7534172:1, Atl3:chr19:7534651-7534955:1, Atl3:chr19:7538248-7538582:1, Atl3:chr19:7539283-7539688:1	Atl3	NA	NA	FALSE	FALSE	0.0336813	NA	FALSE
482	5.60246e-08	1.57828e-05	0.256	0.113376	0.142624	FALSE	0.98985	2 vs 1	0.285248	2 vs 1	-0.488	-0.773248	Slc48a1:chr15:97791431-97791823:1, Slc48a1:chr15:97792318-97792694:1	Slc48a1	6.29656e-07	0.000130464	TRUE	TRUE	1.57828e-05	0.000139195	TRUE
483	0.000477751	NA	0.767857	0.69382	0.0740369	TRUE	Inf	2 vs 1	0.285179	2 vs 1	0.142857	-0.142322	Tmem178b:chr6:40251781-40252191:1, Tmem178b:chr6:40254304-40254458:1, Tmem178b:chr6:40254454-40254820:1, Tmem178b:chr6:40254663-40255142:1, Tmem178b:chr6:40254857-40255160:1	Tmem178b	NA	NA	FALSE	FALSE	0.000477751	NA	FALSE
484	0.501201	NA	0.375	0.282726	0.092274	TRUE	#NAME?	4 vs 1	0.285088	6 vs 2	-0.0833333	-0.368421	B3galt2:chr1:143647503-143648294:1, B3galt2:chr1:143647767-143648116:1, B3galt2:chr1:143648024-143648249:1, B3galt2:chr1:143648302-143648702:1, B3galt2:chr1:143648423-143648741:1, B3galt2:chr1:143650521-143650917:1, B3galt2:chr1:143652133-143652441:1	B3galt2	NA	NA	FALSE	FALSE	0.501201	NA	FALSE
485	0.111508	0.181928	0.658333	0.681004	-0.0226703	TRUE	-0.985284	2 vs 4	0.284767	1 vs 2	0.05	-0.234767	Nol4:chr18:22693165-22693452:-1, Nol4:chr18:22693325-22693796:-1, Nol4:chr18:22694124-22694776:-1, Nol4:chr18:22694331-22694944:-1	Nol4	NA	NA	FALSE	FALSE	0.181928	NA	FALSE
486	0.148078	0.257904	0.601064	0.582143	0.018921	TRUE	1.17792	5 vs 4	0.284498	5 vs 4	0.170213	-0.114286	Fbxo30:chr10:11295121-11295617:1, Fbxo30:chr10:11295560-11296430:1, Fbxo30:chr10:11295857-11296222:1, Fbxo30:chr10:11296623-11296967:1, Fbxo30:chr10:11297517-11298054:1	Fbxo30	NA	NA	FALSE	FALSE	0.257904	NA	FALSE
487	0.923881	NA	0.892241	0.75	0.142241	TRUE	1.01523	2 vs 1	0.284483	2 vs 1	0.784483	0.5	Pawr:chr10:108414098-108414869:1, Pawr:chr10:108414472-108414856:1	Pawr	NA	NA	FALSE	FALSE	0.923881	NA	FALSE
488	0.36654	NA	0.450893	0.402116	0.0487765	TRUE	Inf	1 vs 2	0.282407	3 vs 6	-0.125	-0.407407	Qpctl:chr7:19138410-19138697:-1, Qpctl:chr7:19139608-19139757:-1, Qpctl:chr7:19139628-19139981:-1, Qpctl:chr7:19139829-19140137:-1, Qpctl:chr7:19140005-19140547:-1, Qpctl:chr7:19140240-19140729:-1, Qpctl:chr7:19140594-19140754:-1, Qpctl:chr7:19140801-19141290:-1	Qpctl	NA	NA	FALSE	FALSE	0.36654	NA	FALSE
489	0.227981	0.28889	0.291139	0.15	0.141139	TRUE	1.7346	1 vs 2	0.282278	1 vs 3	-0.417722	-0.7	Eln:chr5:134702597-134702964:-1, Eln:chr5:134702653-134703303:-1, Eln:chr5:134702831-134703132:-1	Eln	NA	NA	FALSE	FALSE	0.28889	NA	FALSE
490	0.0521522	0.154687	0.868852	0.72807	0.140782	TRUE	0.905997	1 vs 2	0.281565	1 vs 2	0.737705	0.45614	Dand5:chr8:84815400-84815756:-1, Dand5:chr8:84815939-84816384:-1	Dand5	NA	NA	FALSE	FALSE	0.154687	NA	FALSE
491	0.211084	0.655033	0.462046	0.436508	0.0255383	TRUE	0.942608	3 vs 1	0.281235	2 vs 1	0.257426	-0.0238095	Usp25:chr16:77115662-77116768:1, Usp25:chr16:77116246-77116599:1, Usp25:chr16:77116454-77116617:1, Usp25:chr16:77116525-77116794:1	Usp25	NA	NA	FALSE	FALSE	0.655033	NA	FALSE
492	0.523024	NA	0.240437	0.1	0.140437	TRUE	1.04694	1 vs 2	0.280874	1 vs 2	-0.519126	-0.8	Dtl:chr1:191536058-191536382:-1, Dtl:chr1:191537337-191537882:-1	Dtl	NA	NA	FALSE	FALSE	0.523024	NA	FALSE
493	2.12329e-07	1.11449e-05	0.772906	0.630872	0.142034	TRUE	1.62573	1 vs 4	0.28068	1 vs 4	0.428331	0.147651	Skp2:chr15:9111982-9112374:-1, Skp2:chr15:9112336-9112830:-1, Skp2:chr15:9112987-9113529:-1, Skp2:chr15:9114139-9114521:-1	Skp2	NA	NA	FALSE	FALSE	1.11449e-05	NA	FALSE
494	0.327392	NA	0.461538	0.321429	0.14011	TRUE	0.593064	1 vs 2	0.28022	1 vs 2	-0.0769231	-0.357143	Prr14l:chr5:32789215-32789545:-1, Prr14l:chr5:32789810-32790171:-1	Prr14l	NA	NA	FALSE	FALSE	0.327392	NA	FALSE
495	0.000353814	0.0013331	0.67382	0.642415	0.0314049	FALSE	-0.787079	2 vs 1	0.279887	3 vs 2	0.248927	-0.0309598	Ryk:chr9:102906816-102907374:1, Ryk:chr9:102907163-102907473:1, Ryk:chr9:102907613-102907944:1	Ryk	0.00197081	0.0069887	TRUE	TRUE	0.0013331	0.00752463	TRUE
496	0.0636593	NA	0.973154	0.833333	0.139821	TRUE	1.981	1 vs 2	0.279642	1 vs 2	0.946309	0.666667	Cdk2:chr10:128697999-128698307:-1, Cdk2:chr10:128697987-128698487:-1	Cdk2	NA	NA	FALSE	FALSE	0.0636593	NA	FALSE
497	6.17393e-10	3.8654e-08	0.375	0.280621	0.0943792	FALSE	0.951428	2 vs 1	0.279362	2 vs 1	-0.25	-0.529362	Csnk2a1:chr2:152278895-152279208:1, Csnk2a1:chr2:152279964-152280366:1, Csnk2a1:chr2:152281513-152281873:1	Csnk2a1	9.22458e-09	5.14395e-07	TRUE	TRUE	3.8654e-08	5.45451e-07	TRUE
498	0.0917581	NA	0.652778	0.579545	0.0732323	TRUE	Inf	1 vs 5	0.279293	3 vs 5	0.361111	0.0818182	Rnf152:chr1:105276914-105277196:-1, Rnf152:chr1:105276914-105277334:-1, Rnf152:chr1:105279927-105280280:-1, Rnf152:chr1:105280184-105280657:-1, Rnf152:chr1:105283742-105284112:-1	Rnf152	NA	NA	FALSE	FALSE	0.0917581	NA	FALSE
499	1.14616e-05	9.82196e-05	0.83871	0.699449	0.139261	FALSE	0.986426	1 vs 3	0.278522	1 vs 3	0.677419	0.398897	Dcaf12:chr4:41291299-41291667:-1, Dcaf12:chr4:41292420-41292969:-1, Dcaf12:chr4:41292961-41293303:-1	Dcaf12	8.87575e-05	0.00068953	TRUE	TRUE	9.82196e-05	0.0007381	TRUE
500	0.442124	NA	0.313559	0.285714	0.027845	TRUE	1.45529	3 vs 2	0.27845	3 vs 2	0.135593	-0.142857	Tcf7l2:chr19:55932818-55933247:1, Tcf7l2:chr19:55933120-55933655:1, Tcf7l2:chr19:55933361-55933655:1	Tcf7l2	NA	NA	FALSE	FALSE	0.442124	NA	FALSE
501	0.00597814	NA	0.940789	0.801587	0.139202	TRUE	2.61007	1 vs 3	0.278404	1 vs 3	0.881579	0.603175	Pitpnm2:chr5:124118664-124118985:-1, Pitpnm2:chr5:124119586-124120131:-1, Pitpnm2:chr5:124120233-124120670:-1	Pitpnm2	NA	NA	FALSE	FALSE	0.00597814	NA	FALSE
502	0.0185899	0.0674173	0.505319	0.366242	0.139077	TRUE	0.888892	2 vs 3	0.278154	1 vs 3	0.0106383	-0.267516	Pcf11:chr7:92643460-92644297:-1, Pcf11:chr7:92644156-92644684:-1, Pcf11:chr7:92668154-92668542:-1	Pcf11	NA	NA	FALSE	FALSE	0.0674173	NA	FALSE
503	0.0291081	0.0807664	0.284946	0.184524	0.100422	TRUE	2.13515	4 vs 1	0.277266	3 vs 1	-0.365591	-0.642857	Col9a3:chr2:180621463-180621815:1, Col9a3:chr2:180621306-180621706:1, Col9a3:chr2:180621635-180621938:1, Col9a3:chr2:180621670-180622145:1, Col9a3:chr2:180621883-180622189:1	Col9a3	NA	NA	FALSE	FALSE	0.0807664	NA	FALSE
504	0.177596	NA	0.835206	0.734848	0.100358	TRUE	0.961411	4 vs 2	0.276558	4 vs 2	0.662921	0.386364	AY358078:chr14:51826184-51826355:1, AY358078:chr14:51826381-51826566:1, AY358078:chr14:51827036-51827270:1, AY358078:chr14:51827895-51828134:1	AY358078	NA	NA	FALSE	FALSE	0.177596	NA	FALSE
505	0.192251	NA	0.763158	0.625	0.138158	TRUE	0.659246	1 vs 2	0.276316	1 vs 2	0.526316	0.25	Abcb7:chrX:104280598-104281031:-1, Abcb7:chrX:104283814-104284311:-1	Abcb7	NA	NA	FALSE	FALSE	0.192251	NA	FALSE
506	0.142067	NA	0.80597	0.719298	0.0866719	TRUE	0.945278	1 vs 2	0.275988	1 vs 2	0.626866	0.350877	Khsrp:chr17:57021041-57021382:-1, Khsrp:chr17:57021210-57021859:-1, Khsrp:chr17:57021603-57021908:-1	Khsrp	NA	NA	FALSE	FALSE	0.142067	NA	FALSE
507	3.17762e-05	0.00102286	0.353952	0.21611	0.137842	FALSE	0.686768	1 vs 2	0.275684	1 vs 2	-0.292096	-0.56778	Ddx49:chr8:70292778-70293265:-1, Ddx49:chr8:70293436-70293773:-1	Ddx49	0.000227999	0.0055314	TRUE	TRUE	0.00102286	0.00596019	TRUE
508	0.117477	0.0990295	0.621951	0.484663	0.137289	TRUE	0.579854	1 vs 4	0.274652	1 vs 4	0.231707	-0.0429448	Gpalpp1:chr14:76086218-76086580:-1, Gpalpp1:chr14:76088399-76088782:-1, Gpalpp1:chr14:76090367-76090792:-1, Gpalpp1:chr14:76090516-76090751:-1	Gpalpp1	NA	NA	FALSE	FALSE	0.117477	NA	FALSE
509	7.14831e-14	1.6515e-10	0.190647	0.0536013	0.137046	FALSE	1.42528	2 vs 1	0.274092	2 vs 1	-0.618705	-0.892797	Araf:chrX:20852497-20852934:1, Araf:chrX:20860020-20860532:1	Araf	1.47616e-12	2.92663e-09	TRUE	TRUE	1.6515e-10	3.06922e-09	TRUE
510	0.804703	0.646946	0.469828	0.333333	0.136494	TRUE	0.572311	2 vs 1	0.272989	2 vs 1	-0.0603448	-0.333333	Tnfaip8:chr18:50090552-50090995:1, Tnfaip8:chr18:50091380-50091833:1	Tnfaip8	NA	NA	FALSE	FALSE	0.804703	NA	FALSE
511	0.585503	NA	0.886076	0.75	0.136076	TRUE	0.952658	2 vs 1	0.272152	2 vs 1	0.772152	0.5	Angptl2:chr2:33246147-33246591:1, Angptl2:chr2:33247289-33247791:1	Angptl2	NA	NA	FALSE	FALSE	0.585503	NA	FALSE
512	0.398779	0.627339	0.264706	0.150943	0.113762	TRUE	0.980829	1 vs 3	0.27192	2 vs 3	-0.294118	-0.566038	Chst2:chr9:95399309-95399593:-1, Chst2:chr9:95400921-95401284:-1, Chst2:chr9:95404086-95404428:-1	Chst2	NA	NA	FALSE	FALSE	0.627339	NA	FALSE
513	0.14431	0.472843	0.6	0.521097	0.078903	TRUE	0.759434	4 vs 2	0.271477	4 vs 2	-0.0133333	-0.28481	Pcdh17:chr14:84533380-84533791:1, Pcdh17:chr14:84533747-84534234:1, Pcdh17:chr14:84536234-84536644:1, Pcdh17:chr14:84537169-84537610:1	Pcdh17	NA	NA	FALSE	FALSE	0.472843	NA	FALSE
514	4.46386e-09	1.12969e-05	0.179515	0.097981	0.0815344	FALSE	0.899361	2 vs 3	0.271391	2 vs 3	-0.447137	-0.718527	Cops2:chr2:125830329-125830532:-1, Cops2:chr2:125830320-125830845:-1, Cops2:chr2:125831546-125832008:-1	Cops2	6.09581e-08	9.73707e-05	TRUE	TRUE	1.12969e-05	0.000103217	TRUE
515	0.201261	0.17207	0.479167	0.34375	0.135417	TRUE	0.693147	2 vs 3	0.270833	1 vs 3	-0.0416667	-0.3125	Xpo4:chr14:57577501-57577854:-1, Xpo4:chr14:57577501-57578228:-1, Xpo4:chr14:57577804-57578055:-1	Xpo4	NA	NA	FALSE	FALSE	0.201261	NA	FALSE
516	0.0394956	0.164696	0.774194	0.638889	0.135305	TRUE	0.661599	2 vs 1	0.270609	2 vs 1	0.548387	0.277778	Osbp:chr19:11993559-11994114:1, Osbp:chr19:11993774-11994114:1	Osbp	NA	NA	FALSE	FALSE	0.164696	NA	FALSE
517	0.640676	NA	1	0.865031	0.134969	TRUE	Inf	2 vs 1	0.269939	2 vs 1	1	0.730061	Olfml2b:chr1:170682146-170682789:1, Olfml2b:chr1:170682437-170682789:1	Olfml2b	NA	NA	FALSE	FALSE	0.640676	NA	FALSE
518	0.00874994	0.00753218	0.740741	0.63285	0.10789	TRUE	Inf	2 vs 1	0.269928	9 vs 4	0.0416667	-0.228261	Timp3:chr10:86345892-86346191:1, Timp3:chr10:86346636-86347043:1, Timp3:chr10:86346470-86347385:1, Timp3:chr10:86347906-86348536:1, Timp3:chr10:86348284-86348556:1, Timp3:chr10:86348590-86349032:1, Timp3:chr10:86348794-86349074:1, Timp3:chr10:86348703-86349326:1, Timp3:chr10:86349015-86349412:1, Timp3:chr10:86349187-86349521:1	Timp3	NA	NA	FALSE	FALSE	0.00874994	NA	FALSE
519	0.0163739	0.014225	0.571429	0.436548	0.13488	TRUE	0.542865	2 vs 1	0.269761	2 vs 1	0.142857	-0.126904	Syne2:chr12:76110172-76110928:1, Syne2:chr12:76110533-76110928:1	Syne2	NA	NA	FALSE	FALSE	0.0163739	NA	FALSE
520	0.365801	NA	0.833333	0.743243	0.0900901	TRUE	1.06471	1 vs 3	0.269627	1 vs 2	0.404762	0.135135	Zfp772:chr7:7202112-7202475:-1, Zfp772:chr7:7203019-7203483:-1, Zfp772:chr7:7203352-7203618:-1	Zfp772	NA	NA	FALSE	FALSE	0.365801	NA	FALSE
521	0.17648	NA	0.752137	0.659574	0.0925623	TRUE	1.50408	2 vs 3	0.269504	1 vs 3	0.333333	0.0638298	Lats2:chr14:57689652-57690046:-1, Lats2:chr14:57690088-57690605:-1, Lats2:chr14:57693407-57693590:-1, Lats2:chr14:57722149-57722535:-1	Lats2	NA	NA	FALSE	FALSE	0.17648	NA	FALSE
522	0.333369	NA	0.911192	0.8	0.111192	TRUE	1.09299	1 vs 3	0.268856	1 vs 2	0.768856	0.5	Ect2:chr3:27097202-27097569:-1, Ect2:chr3:27097184-27097935:-1, Ect2:chr3:27098276-27098542:-1	Ect2	NA	NA	FALSE	FALSE	0.333369	NA	FALSE
523	0.137297	0.235005	0.58	0.490625	0.089375	TRUE	2.80336	3 vs 2	0.26875	5 vs 2	0.3	0.03125	Mpv17l:chr16:13946746-13947329:1, Mpv17l:chr16:13947423-13947709:1, Mpv17l:chr16:13947965-13948220:1, Mpv17l:chr16:13948026-13948743:1, Mpv17l:chr16:13949097-13949365:1, Mpv17l:chr16:13949316-13949610:1	Mpv17l	NA	NA	FALSE	FALSE	0.235005	NA	FALSE
524	0.0179925	0.0484596	0.627706	0.621129	0.0065763	TRUE	1.28093	4 vs 3	0.268114	4 vs 3	-0.480519	-0.748634	Mib1:chr18:10816382-10816797:1, Mib1:chr18:10816967-10817776:1, Mib1:chr18:10817379-10817747:1, Mib1:chr18:10818244-10818554:1	Mib1	NA	NA	FALSE	FALSE	0.0484596	NA	FALSE
525	0.200575	0.336562	0.418301	0.296296	0.122004	TRUE	#NAME?	1 vs 2	0.267974	3 vs 4	-0.176471	-0.444444	Trmt5:chr12:73276968-73277306:-1, Trmt5:chr12:73276974-73277592:-1, Trmt5:chr12:73279968-73280381:-1, Trmt5:chr12:73280383-73280700:-1	Trmt5	NA	NA	FALSE	FALSE	0.336562	NA	FALSE
526	2.2861e-43	1.88377e-43	0.369184	0.354686	0.0144986	FALSE	1.29033	4 vs 5	0.267863	4 vs 5	0.493969	0.226106	Celf2:chr2:6539694-6540280:-1, Celf2:chr2:6541844-6542222:-1, Celf2:chr2:6543432-6543765:-1, Celf2:chr2:6544760-6545177:-1, Celf2:chr2:6546325-6546686:-1	Celf2	1.81459e-41	2.17262e-41	TRUE	TRUE	2.2861e-43	2.72164e-41	TRUE
527	0.0095189	NA	0.175	0.0410959	0.133904	TRUE	1.59929	2 vs 1	0.267808	2 vs 1	-0.65	-0.917808	Zfp3:chr11:70772546-70772950:1, Zfp3:chr11:70775932-70776258:1	Zfp3	NA	NA	FALSE	FALSE	0.0095189	NA	FALSE
528	2.49743e-05	0.000197232	0.372788	0.264803	0.107985	FALSE	#NAME?	1 vs 2	0.267466	2 vs 5	-0.00884956	-0.276316	Cyhr1:chr15:76643387-76644298:-1, Cyhr1:chr15:76643643-76644173:-1, Cyhr1:chr15:76645720-76646097:-1, Cyhr1:chr15:76646881-76647272:-1, Cyhr1:chr15:76658124-76658473:-1	Cyhr1	0.000184403	0.00129809	TRUE	TRUE	0.000197232	0.00139158	TRUE
529	0.209465	NA	0.896552	0.763158	0.133394	TRUE	0.989413	2 vs 1	0.266788	2 vs 1	0.793103	0.526316	Hs1bp3:chr12:8342645-8342950:1, Hs1bp3:chr12:8343475-8343824:1	Hs1bp3	NA	NA	FALSE	FALSE	0.209465	NA	FALSE
530	0.623251	NA	0.133333	0	0.133333	TRUE	Inf	1 vs 2	0.266667	1 vs 2	-0.733333	-1	Pex11g:chr8:3457105-3457442:-1, Pex11g:chr8:3458779-3459197:-1	Pex11g	NA	NA	FALSE	FALSE	0.623251	NA	FALSE
531	0.420951	NA	0.857143	0.833333	0.0238095	TRUE	#NAME?	2 vs 1	0.266667	3 vs 2	0.6	0.333333	Zhx2:chr15:57839166-57839547:1, Zhx2:chr15:57839365-57839625:1, Zhx2:chr15:57839467-57839832:1	Zhx2	NA	NA	FALSE	FALSE	0.420951	NA	FALSE
532	0.0906321	0.0329484	0.695035	0.60472	0.0903157	TRUE	Inf	1 vs 2	0.265863	1 vs 3	0.212766	-0.0530973	Frmd5:chr2:121545488-121545892:-1, Frmd5:chr2:121548053-121548403:-1, Frmd5:chr2:121548325-121548595:-1, Frmd5:chr2:121548120-121548826:-1	Frmd5	NA	NA	FALSE	FALSE	0.0906321	NA	FALSE
533	0.201204	NA	0.744681	0.61194	0.132741	TRUE	0.614966	1 vs 2	0.265481	1 vs 2	0.489362	0.223881	Setd7:chr3:51515318-51515679:-1, Setd7:chr3:51516023-51516467:-1	Setd7	NA	NA	FALSE	FALSE	0.201204	NA	FALSE
534	0.00921261	0.0163882	0.708333	0.682415	0.0259186	TRUE	2.5337	2 vs 1	0.265186	2 vs 1	0.178571	-0.0866142	Kif3b:chr2:153330577-153330943:1, Kif3b:chr2:153331791-153332265:1, Kif3b:chr2:153332921-153333390:1, Kif3b:chr2:153333069-153333390:1	Kif3b	NA	NA	FALSE	FALSE	0.0163882	NA	FALSE
535	0.546342	NA	0.882353	0.75	0.132353	TRUE	0.916291	2 vs 1	0.264706	2 vs 1	0.764706	0.5	Rims3:chr4:120896200-120896402:1, Rims3:chr4:120896253-120896586:1	Rims3	NA	NA	FALSE	FALSE	0.546342	NA	FALSE
536	0.000113008	0.000400356	0.207692	0.0922266	0.115466	FALSE	1.7492	3 vs 2	0.264336	3 vs 1	-0.553846	-0.818182	Alg14:chr3:121361623-121362063:1, Alg14:chr3:121362490-121362660:1, Alg14:chr3:121362536-121363055:1, Alg14:chr3:121362769-121363112:1	Alg14	0.000721205	0.00241209	TRUE	TRUE	0.000400356	0.00259414	TRUE
537	0.294694	NA	0.678571	0.683333	-0.0047619	TRUE	Inf	2 vs 1	0.264286	2 vs 1	0.464286	0.2	Tmem64:chr4:15284735-15285041:1, Tmem64:chr4:15284972-15285372:1, Tmem64:chr4:15286331-15286706:1, Tmem64:chr4:15286295-15286858:1	Tmem64	NA	NA	FALSE	FALSE	0.294694	NA	FALSE
538	0.107779	0.104222	0.364865	0.350575	0.0142902	TRUE	#NAME?	1 vs 2	0.264057	2 vs 3	0.459459	0.195402	Zfp770:chr2:114193306-114193564:-1, Zfp770:chr2:114193454-114193738:-1, Zfp770:chr2:114193378-114193959:-1	Zfp770	NA	NA	FALSE	FALSE	0.107779	NA	FALSE
539	0.516358	NA	0.571429	0.471545	0.0998839	TRUE	Inf	1 vs 3	0.263647	2 vs 3	0.857143	0.593496	Fgf12:chr16:28161746-28162356:-1, Fgf12:chr16:28162117-28162473:-1, Fgf12:chr16:28162327-28162590:-1	Fgf12	NA	NA	FALSE	FALSE	0.516358	NA	FALSE
540	0.00409684	0.0186672	0.77305	0.641343	0.131707	FALSE	0.644415	1 vs 2	0.263414	1 vs 2	0.546099	0.282686	Zcchc14:chr8:121598695-121599060:-1, Zcchc14:chr8:121600355-121600712:-1	Zcchc14	0.017257	0.0657872	TRUE	FALSE	0.0186672	0.0728017	FALSE
541	0.00187142	0.0121138	0.412955	0.28125	0.131705	FALSE	0.586509	1 vs 2	0.263411	1 vs 2	-0.174089	-0.4375	Rnf6:chr5:146209175-146209552:-1, Rnf6:chr5:146210104-146210460:-1	Rnf6	0.0088259	0.0454173	TRUE	TRUE	0.0121138	0.0511113	FALSE
542	1.24118e-11	5.18772e-15	0.259119	0.127708	0.131411	FALSE	0.870827	1 vs 2	0.262823	1 vs 2	-0.481761	-0.744584	Med25:chr7:44876763-44877159:-1, Med25:chr7:44879371-44879636:-1	Med25	2.17421e-10	1.26916e-13	TRUE	TRUE	1.24118e-11	2.46298e-10	TRUE
543	0.267434	NA	0.742424	0.72973	0.0126945	TRUE	-1.20397	2 vs 1	0.26208	3 vs 2	0.424242	0.162162	Gpatch2:chr1:187233967-187234369:1, Gpatch2:chr1:187351045-187351457:1, Gpatch2:chr1:187351372-187351689:1	Gpatch2	NA	NA	FALSE	FALSE	0.267434	NA	FALSE
544	0.625159	NA	0.75	0.619048	0.130952	TRUE	0.613104	1 vs 2	0.261905	1 vs 2	0.5	0.238095	Gcg:chr2:62474530-62474795:-1, Gcg:chr2:62474530-62475085:-1	Gcg	NA	NA	FALSE	FALSE	0.625159	NA	FALSE
545	0.182235	0.352309	0.4	0.398876	0.0011236	TRUE	1.06752	1 vs 2	0.261798	1 vs 2	-0.3	-0.561798	Zfp747:chr7:127372528-127372688:-1, Zfp747:chr7:127372528-127372907:-1, Zfp747:chr7:127372998-127373327:-1	Zfp747	NA	NA	FALSE	FALSE	0.352309	NA	FALSE
546	1.51361e-05	7.66173e-05	0.793796	0.662953	0.130843	FALSE	0.671478	2 vs 1	0.261686	2 vs 1	0.587591	0.325905	Amotl2:chr9:102732690-102733343:1, Amotl2:chr9:102733050-102733418:1	Amotl2	0.000116502	0.000553932	TRUE	TRUE	7.66173e-05	0.000589721	TRUE
547	0.122992	NA	0.584615	0.453782	0.130834	TRUE	0.527153	2 vs 1	0.261668	2 vs 1	0.169231	-0.092437	Tmem175:chr5:108646241-108646715:1, Tmem175:chr5:108646902-108647280:1	Tmem175	NA	NA	FALSE	FALSE	0.122992	NA	FALSE
548	0.000221863	0.000126054	0.883562	0.785877	0.0976847	FALSE	1.79966	3 vs 2	0.2616	3 vs 2	0.842466	0.580866	Bpnt1:chr1:185356406-185356864:1, Bpnt1:chr1:185356626-185356932:1, Bpnt1:chr1:185357375-185357806:1	Bpnt1	0.0013075	0.000862435	TRUE	TRUE	0.000221863	0.00153971	TRUE
549	0.646174	NA	0.9	0.769231	0.130769	TRUE	Inf	1 vs 3	0.261538	1 vs 3	0.8	0.538462	Klhl11:chr11:100462534-100462979:-1, Klhl11:chr11:100462670-100463053:-1, Klhl11:chr11:100462786-100463057:-1	Klhl11	NA	NA	FALSE	FALSE	0.646174	NA	FALSE
550	0.803898	NA	0.727273	0.613855	0.113418	TRUE	Inf	3 vs 1	0.260756	6 vs 1	0.363636	0.102881	Gnal:chr18:67089124-67089477:1, Gnal:chr18:67223461-67224020:1, Gnal:chr18:67223895-67224283:1, Gnal:chr18:67224455-67224664:1, Gnal:chr18:67224489-67224888:1, Gnal:chr18:67224645-67225071:1, Gnal:chr18:67226387-67226792:1	Gnal	NA	NA	FALSE	FALSE	0.803898	NA	FALSE
551	0.103314	0.171386	0.595745	0.465517	0.130227	TRUE	1.39734	1 vs 3	0.260455	1 vs 3	0.191489	-0.0689655	Adat1:chr8:111964848-111965162:-1, Adat1:chr8:111966888-111967314:-1, Adat1:chr8:111968071-111968446:-1	Adat1	NA	NA	FALSE	FALSE	0.171386	NA	FALSE
552	0.0147549	0.0159612	0.45122	0.451064	0.000155682	TRUE	1.2205	4 vs 3	0.260353	4 vs 3	0.256098	-0.00425532	Tmem87b:chr2:128851458-128851772:1, Tmem87b:chr2:128851903-128852564:1, Tmem87b:chr2:128852199-128852652:1, Tmem87b:chr2:128853896-128854290:1	Tmem87b	NA	NA	FALSE	FALSE	0.0159612	NA	FALSE
553	0.127159	NA	0.512821	0.385135	0.127685	TRUE	1.1944	3 vs 1	0.260222	2 vs 1	0.435897	0.175676	Ascc3:chr10:50618543-50618950:1, Ascc3:chr10:50850834-50851215:1, Ascc3:chr10:50852346-50852697:1	Ascc3	NA	NA	FALSE	FALSE	0.127159	NA	FALSE
554	0.790648	NA	0.857143	0.727273	0.12987	TRUE	0.81093	2 vs 1	0.25974	2 vs 1	0.714286	0.454545	Neurl1b:chr17:26445906-26446317:1, Neurl1b:chr17:26446002-26446378:1	Neurl1b	NA	NA	FALSE	FALSE	0.790648	NA	FALSE
555	0.295806	0.336192	0.44697	0.337662	0.109307	TRUE	0.927987	2 vs 1	0.25974	2 vs 1	-0.181818	-0.441558	Zbtb4:chr11:69780943-69781168:1, Zbtb4:chr11:69781496-69782008:1, Zbtb4:chr11:69782812-69783643:1, Zbtb4:chr11:69783178-69783526:1	Zbtb4	NA	NA	FALSE	FALSE	0.336192	NA	FALSE
556	0.267621	NA	0.916667	0.786842	0.129825	TRUE	Inf	2 vs 1	0.259649	3 vs 1	0.833333	0.573684	Zfpm2:chr15:41103357-41103786:1, Zfpm2:chr15:41103496-41103734:1, Zfpm2:chr15:41104151-41104592:1	Zfpm2	NA	NA	FALSE	FALSE	0.267621	NA	FALSE
557	1	NA	1	0.870504	0.129496	TRUE	Inf	1 vs 2	0.258993	1 vs 2	1	0.741007	Bsn:chr9:108096022-108096350:-1, Bsn:chr9:108098557-108098878:-1	Bsn	NA	NA	FALSE	FALSE	1	NA	FALSE
558	0.00377632	0.0250398	0.553672	0.537954	0.0157185	TRUE	2.06369	4 vs 3	0.258684	4 vs 3	-0.389831	-0.648515	Hip1r:chr5:124002356-124003004:1, Hip1r:chr5:124002768-124003146:1, Hip1r:chr5:124002895-124003222:1, Hip1r:chr5:124005141-124005545:1	Hip1r	NA	NA	FALSE	FALSE	0.0250398	NA	FALSE
559	0.0197788	0.0616975	0.36478	0.293561	0.0712193	TRUE	1.69378	2 vs 3	0.258469	2 vs 3	0.264151	0.00568182	Mindy2:chr9:70599014-70599378:-1, Mindy2:chr9:70603290-70603499:-1, Mindy2:chr9:70603151-70603710:-1, Mindy2:chr9:70604556-70604925:-1	Mindy2	NA	NA	FALSE	FALSE	0.0616975	NA	FALSE
560	0.00340382	0.00441827	0.842105	0.712934	0.129172	FALSE	0.764301	2 vs 1	0.258343	2 vs 1	0.684211	0.425868	2310022A10Rik:chr7:27581216-27581693:1, 2310022A10Rik:chr7:27581676-27582099:1	2310022A10Rik	0.0147538	0.019599	TRUE	TRUE	0.00441827	0.0214988	TRUE
561	0.53123	NA	1	0.870968	0.129032	TRUE	Inf	2 vs 1	0.258065	2 vs 1	1	0.741935	Sema7a:chr9:57962078-57962843:1, Sema7a:chr9:57962503-57962865:1	Sema7a	NA	NA	FALSE	FALSE	0.53123	NA	FALSE
562	0.355827	NA	0.416667	0.287671	0.128995	TRUE	0.570249	2 vs 1	0.257991	2 vs 1	-0.166667	-0.424658	Zfp992:chr4:146467786-146468136:1, Zfp992:chr4:146469165-146469435:1	Zfp992	NA	NA	FALSE	FALSE	0.355827	NA	FALSE
563	0.0222035	NA	0.778761	0.64977	0.128991	FALSE	0.640434	1 vs 2	0.257983	1 vs 2	0.557522	0.299539	1810030O07Rik:chrX:12654879-12655224:-1, 1810030O07Rik:chrX:12656333-12656525:-1	1810030O07Rik	0.0700584	NA	FALSE	NA	0.0222035	0.0837994	FALSE
564	0.503306	NA	0.509524	0.473684	0.0358396	TRUE	0.942608	1 vs 3	0.257895	1 vs 3	0.1	-0.157895	Gabpb2:chr3:95181766-95182029:-1, Gabpb2:chr3:95181766-95182186:-1, Gabpb2:chr3:95187347-95187740:-1, Gabpb2:chr3:95187704-95188091:-1	Gabpb2	NA	NA	FALSE	FALSE	0.503306	NA	FALSE
565	0.0976382	0.164556	0.342105	0.312987	0.0291183	TRUE	Inf	5 vs 1	0.257861	3 vs 1	0.355263	0.0974026	Abhd13:chr8:9988597-9989106:1, Abhd13:chr8:9989527-9989977:1, Abhd13:chr8:9989709-9989991:1, Abhd13:chr8:9991516-9991933:1, Abhd13:chr8:9991782-9991963:1, Abhd13:chr8:9991774-9992155:1	Abhd13	NA	NA	FALSE	FALSE	0.164556	NA	FALSE
566	0.00232882	0.00495765	0.720149	0.59127	0.128879	TRUE	1.25943	1 vs 3	0.257759	1 vs 3	0.440299	0.18254	Zfp871:chr17:32765490-32765818:-1, Zfp871:chr17:32771223-32771581:-1, Zfp871:chr17:32773252-32773623:-1	Zfp871	NA	NA	FALSE	FALSE	0.00495765	NA	FALSE
567	2.58359e-16	6.74703e-15	0.411299	0.282505	0.128794	FALSE	0.573473	1 vs 2	0.257589	1 vs 2	-0.177401	-0.43499	Dtymk:chr1:93792549-93792952:-1, Dtymk:chr1:93800456-93800860:-1	Dtymk	6.24983e-15	1.63413e-13	TRUE	TRUE	6.74703e-15	1.73106e-13	TRUE
568	2.51866e-05	7.78397e-05	0.667984	0.539427	0.128558	FALSE	0.541048	1 vs 2	0.257115	1 vs 2	0.335968	0.078853	Sbds:chr5:130245692-130246104:-1, Sbds:chr5:130246077-130246512:-1	Sbds	0.000185432	0.000561094	TRUE	TRUE	7.78397e-05	0.000597319	TRUE
569	0.0730539	0.0611184	0.537634	0.409091	0.128543	TRUE	0.691294	2 vs 1	0.257087	3 vs 1	0.0752688	-0.181818	Ocrl:chrX:47959456-47959935:1, Ocrl:chrX:47965290-47965943:1, Ocrl:chrX:47965536-47965836:1	Ocrl	NA	NA	FALSE	FALSE	0.0730539	NA	FALSE
570	0.190072	0.0528123	0.552083	0.5	0.0520833	TRUE	0.796159	2 vs 3	0.256877	2 vs 3	0.208333	-0.0485437	Galnt7:chr8:57523824-57524180:-1, Galnt7:chr8:57524495-57525158:-1, Galnt7:chr8:57525729-57526056:-1	Galnt7	NA	NA	FALSE	FALSE	0.190072	NA	FALSE
571	0.0111409	0.0239431	0.27	0.214945	0.0550546	FALSE	-0.889369	2 vs 3	0.256814	3 vs 4	0.015	-0.241814	Zmym5:chr14:56790565-56790941:-1, Zmym5:chr14:56790573-56791166:-1, Zmym5:chr14:56792879-56793317:-1, Zmym5:chr14:56793271-56793731:-1	Zmym5	0.0401958	0.0806538	TRUE	FALSE	0.0239431	0.0887816	FALSE
572	1	NA	0.333333	0.205128	0.128205	TRUE	0.661398	1 vs 2	0.25641	1 vs 2	-0.333333	-0.589744	Faah:chr4:115996670-115997004:-1, Faah:chr4:115997781-115998114:-1	Faah	NA	NA	FALSE	FALSE	1	NA	FALSE
573	0.0538151	0.0304332	0.522727	0.516667	0.00606061	TRUE	Inf	1 vs 4	0.256061	2 vs 3	0.272727	0.0166667	Slc35b4:chr6:34153356-34153734:-1, Slc35b4:chr6:34155801-34156251:-1, Slc35b4:chr6:34156489-34156865:-1, Slc35b4:chr6:34157043-34157264:-1, Slc35b4:chr6:34158051-34158464:-1	Slc35b4	NA	NA	FALSE	FALSE	0.0538151	NA	FALSE
574	1.75538e-11	8.38065e-08	0.652348	0.632043	0.0203048	FALSE	2.39093	7 vs 2	0.255993	7 vs 6	-0.0790378	-0.335031	Cxadr:chr16:78336359-78336818:1, Cxadr:chr16:78336635-78337009:1, Cxadr:chr16:78336932-78337749:1, Cxadr:chr16:78337263-78337566:1, Cxadr:chr16:78337582-78338023:1, Cxadr:chr16:78340365-78340783:1, Cxadr:chr16:78359454-78359785:1	Cxadr	3.03311e-10	1.03561e-06	TRUE	TRUE	8.38065e-08	1.10295e-06	TRUE
575	0.0916203	NA	0.203125	0.0754717	0.127653	TRUE	1.13865	1 vs 2	0.255307	1 vs 2	-0.59375	-0.849057	Zfp969:chr2:175686937-175687712:-1, Zfp969:chr2:175687927-175688209:-1	Zfp969	NA	NA	FALSE	FALSE	0.0916203	NA	FALSE
576	0.00606664	0.000639713	0.625	0.502732	0.122268	TRUE	3.09104	3 vs 1	0.255237	4 vs 1	0.402778	0.147541	Pde4b:chr4:102542181-102542533:1, Pde4b:chr4:102605477-102605828:1, Pde4b:chr4:102606595-102607361:1, Pde4b:chr4:102606869-102607267:1	Pde4b	NA	NA	FALSE	FALSE	0.00606664	NA	FALSE
577	0.735785	0.882922	0.555556	0.423077	0.132479	TRUE	1.24522	4 vs 1	0.255189	4 vs 1	0.222222	-0.032967	Nefl:chr14:68087278-68087956:1, Nefl:chr14:68087509-68087915:1, Nefl:chr14:68088562-68089096:1, Nefl:chr14:68088779-68089096:1	Nefl	NA	NA	FALSE	FALSE	0.882922	NA	FALSE
578	0.0531186	0.300506	0.587209	0.459627	0.127582	TRUE	0.799289	3 vs 1	0.255164	3 vs 1	0.174419	-0.0807453	Fut11:chr14:20698156-20698332:1, Fut11:chr14:20699752-20700234:1, Fut11:chr14:20700637-20701016:1	Fut11	NA	NA	FALSE	FALSE	0.300506	NA	FALSE
579	1.56242e-07	7.69e-06	0.540193	0.442222	0.0979707	FALSE	1.62814	1 vs 2	0.254962	1 vs 2	0.228296	-0.0266667	Palld:chr8:61511375-61511833:-1, Palld:chr8:61512541-61513326:-1, Palld:chr8:61513258-61513569:-1, Palld:chr8:61514603-61515104:-1	Palld	1.63989e-06	6.84749e-05	TRUE	TRUE	7.69e-06	7.26119e-05	TRUE
580	0.361509	0.643444	0.540024	0.462963	0.0770609	TRUE	Inf	4 vs 1	0.25448	6 vs 2	0.365591	0.111111	2810459M11Rik:chr1:86053078-86053856:1, 2810459M11Rik:chr1:86054156-86054354:1, 2810459M11Rik:chr1:86054259-86054721:1, 2810459M11Rik:chr1:86054352-86055303:1, 2810459M11Rik:chr1:86054759-86055020:1, 2810459M11Rik:chr1:86055060-86055477:1, 2810459M11Rik:chr1:86055497-86056069:1	2810459M11Rik	NA	NA	FALSE	FALSE	0.643444	NA	FALSE
581	0.0307629	0.010914	0.853659	0.726519	0.127139	TRUE	Inf	2 vs 1	0.254278	3 vs 1	0.707317	0.453039	Fat4:chr3:39011096-39011732:1, Fat4:chr3:39011548-39011872:1, Fat4:chr3:39011714-39011986:1	Fat4	NA	NA	FALSE	FALSE	0.0307629	NA	FALSE
582	0.0482152	NA	0.356618	0.229508	0.127109	TRUE	#NAME?	1 vs 2	0.254219	1 vs 3	-0.286765	-0.540984	AI987944:chr7:41372900-41373260:-1, AI987944:chr7:41373182-41373462:-1, AI987944:chr7:41373780-41374176:-1	AI987944	NA	NA	FALSE	FALSE	0.0482152	NA	FALSE
583	0.220461	0.257241	0.688172	0.651852	0.0363202	TRUE	Inf	2 vs 1	0.253763	4 vs 3	0.387097	0.133333	Vps54:chr11:21319772-21320014:1, Vps54:chr11:21319921-21320504:1, Vps54:chr11:21320202-21320668:1, Vps54:chr11:21320749-21321138:1	Vps54	NA	NA	FALSE	FALSE	0.257241	NA	FALSE
584	0.64275	NA	0.8	0.743902	0.0560976	TRUE	Inf	2 vs 1	0.253659	2 vs 1	0.4	0.146341	Nck2:chr1:43569931-43570313:1, Nck2:chr1:43570100-43570393:1, Nck2:chr1:43570230-43570518:1	Nck2	NA	NA	FALSE	FALSE	0.64275	NA	FALSE
585	0.0096749	0.0266815	0.577391	0.504527	0.0728646	TRUE	1.75402	3 vs 5	0.253641	2 vs 5	0.356522	0.102881	Pdik1l:chr4:134274996-134275243:-1, Pdik1l:chr4:134275114-134275565:-1, Pdik1l:chr4:134275289-134276087:-1, Pdik1l:chr4:134276542-134277027:-1, Pdik1l:chr4:134277760-134278232:-1, Pdik1l:chr4:134278106-134278508:-1	Pdik1l	NA	NA	FALSE	FALSE	0.0266815	NA	FALSE
586	5.89323e-07	6.48104e-07	0.515996	0.454432	0.0615639	FALSE	1.88644	4 vs 3	0.253186	4 vs 3	-0.0464396	-0.299625	Tor1aip2:chr1:156052112-156052908:1, Tor1aip2:chr1:156052429-156052815:1, Tor1aip2:chr1:156053154-156053543:1, Tor1aip2:chr1:156068461-156068841:1	Tor1aip2	5.52354e-06	6.88468e-06	TRUE	TRUE	6.48104e-07	7.34904e-06	TRUE
587	0.406982	NA	0.735294	0.609023	0.126272	TRUE	1.09861	1 vs 2	0.252543	1 vs 3	0.470588	0.218045	Slc29a3:chr10:60712059-60712416:-1, Slc29a3:chr10:60715237-60715598:-1, Slc29a3:chr10:60715518-60715886:-1	Slc29a3	NA	NA	FALSE	FALSE	0.406982	NA	FALSE
588	0.0250708	0.0376002	0.617647	0.509346	0.108301	TRUE	Inf	2 vs 1	0.25252	5 vs 2	-0.196078	-0.448598	Gm14440:chr2:175284261-175284461:1, Gm14440:chr2:175284177-175284764:1, Gm14440:chr2:175284821-175284971:1, Gm14440:chr2:175290326-175290658:1, Gm14440:chr2:175290818-175291657:1	Gm14440	NA	NA	FALSE	FALSE	0.0376002	NA	FALSE
589	0.499402	0.596557	0.416667	0.315315	0.101351	TRUE	1.53148	4 vs 1	0.252252	2 vs 1	-0.166667	-0.418919	Gm43517:chr12:49392346-49392853:1, Gm43517:chr12:49392589-49392870:1, Gm43517:chr12:49392941-49393623:1, Gm43517:chr12:49393574-49393678:1	Gm43517	NA	NA	FALSE	FALSE	0.596557	NA	FALSE
590	0.744692	0.6365	0.833333	0.756757	0.0765766	TRUE	Inf	1 vs 3	0.252252	2 vs 3	0.333333	0.0810811	Ica1l:chr1:59989068-59989465:-1, Ica1l:chr1:59990554-59990932:-1, Ica1l:chr1:59990713-59991185:-1	Ica1l	NA	NA	FALSE	FALSE	0.744692	NA	FALSE
591	0.0308319	0.0607184	0.556231	0.405506	0.150725	TRUE	1.90954	5 vs 2	0.252216	5 vs 2	0.106383	-0.145833	Zfp563:chr17:33105239-33105935:1, Zfp563:chr17:33105564-33105885:1, Zfp563:chr17:33105398-33106380:1, Zfp563:chr17:33105855-33106209:1, Zfp563:chr17:33106609-33107105:1, Zfp563:chr17:33106745-33107496:1, Zfp563:chr17:33107860-33108241:1, Zfp563:chr17:33110236-33110713:1	Zfp563	NA	NA	FALSE	FALSE	0.0607184	NA	FALSE
592	0.000404351	0.000427416	0.427313	0.40458	0.0227326	FALSE	-1.32097	3 vs 2	0.252093	2 vs 1	0.629956	0.377863	Zfp160:chr17:21028415-21028921:1, Zfp160:chr17:21031453-21031695:1, Zfp160:chr17:21042663-21043039:1	Zfp160	0.00223272	0.00253218	TRUE	TRUE	0.000427416	0.00273582	TRUE
593	0.15765	NA	0.68	0.554054	0.125946	TRUE	0.536707	1 vs 2	0.251892	1 vs 2	0.36	0.108108	Nfatc2ip:chr7:126382854-126383169:-1, Nfatc2ip:chr7:126382944-126383420:-1	Nfatc2ip	NA	NA	FALSE	FALSE	0.15765	NA	FALSE
594	0.720374	NA	0.857143	0.747166	0.109977	TRUE	Inf	1 vs 3	0.251701	1 vs 2	0.142857	-0.108844	Kcnq3:chr15:65986376-65986765:-1, Kcnq3:chr15:65986893-65987200:-1, Kcnq3:chr15:65989400-65989705:-1, Kcnq3:chr15:65994755-65995285:-1	Kcnq3	NA	NA	FALSE	FALSE	0.720374	NA	FALSE
595	0.0638937	0.112281	0.669048	0.607407	0.0616402	TRUE	2.0232	2 vs 6	0.251323	2 vs 6	0.214286	-0.037037	Mphosph9:chr5:124250959-124251329:-1, Mphosph9:chr5:124252726-124252999:-1, Mphosph9:chr5:124252493-124253343:-1, Mphosph9:chr5:124253332-124253718:-1, Mphosph9:chr5:124254284-124254682:-1, Mphosph9:chr5:124254491-124255071:-1	Mphosph9	NA	NA	FALSE	FALSE	0.112281	NA	FALSE
596	0.0123665	0.0301513	0.292308	0.166667	0.125641	TRUE	1.55571	1 vs 3	0.251282	1 vs 3	-0.415385	-0.666667	Pdgfa:chr5:138975998-138976358:-1, Pdgfa:chr5:138976462-138976688:-1, Pdgfa:chr5:138976954-138977294:-1	Pdgfa	NA	NA	FALSE	FALSE	0.0301513	NA	FALSE
597	2.89776e-08	2.20701e-07	0.416811	0.291295	0.125516	FALSE	0.699644	2 vs 3	0.251033	1 vs 3	-0.166378	-0.417411	Irf2bpl:chr12:86880685-86881024:-1, Irf2bpl:chr12:86880880-86881154:-1, Irf2bpl:chr12:86881094-86881535:-1	Irf2bpl	3.36088e-07	2.55759e-06	TRUE	TRUE	2.20701e-07	2.73454e-06	TRUE
598	0.0847538	0.0368717	0.49053	0.365819	0.124711	TRUE	1.38629	2 vs 4	0.250963	1 vs 7	-0.0795455	-0.330508	Gm14418:chr2:177384301-177384674:-1, Gm14418:chr2:177386186-177386466:-1, Gm14418:chr2:177388055-177388396:-1, Gm14418:chr2:177388245-177388410:-1, Gm14418:chr2:177388173-177388634:-1, Gm14418:chr2:177388095-177388836:-1, Gm14418:chr2:177389118-177389285:-1	Gm14418	NA	NA	FALSE	FALSE	0.0847538	NA	FALSE
599	4.39058e-20	6.22517e-21	0.341512	0.245312	0.0961999	FALSE	1.68351	1 vs 7	0.250615	5 vs 7	0.241379	-0.00923594	Syncrip:chr9:88449428-88450317:-1, Syncrip:chr9:88449672-88450148:-1, Syncrip:chr9:88451588-88452363:-1, Syncrip:chr9:88452415-88452769:-1, Syncrip:chr9:88452603-88453093:-1, Syncrip:chr9:88453915-88454307:-1, Syncrip:chr9:88455538-88455969:-1	Syncrip	1.31201e-18	2.09408e-19	TRUE	TRUE	4.39058e-20	1.52768e-18	TRUE
600	0.2999	0.410838	0.83871	0.71345	0.125259	TRUE	Inf	1 vs 2	0.250519	1 vs 3	0.677419	0.426901	Shf:chr2:122348880-122349211:-1, Shf:chr2:122349296-122349579:-1, Shf:chr2:122349172-122349441:-1	Shf	NA	NA	FALSE	FALSE	0.410838	NA	FALSE
601	1	NA	1	0.875	0.125	TRUE	Inf	2 vs 1	0.25	2 vs 1	1	0.75	Arhgap20:chr9:51852167-51852335:1, Arhgap20:chr9:51853545-51853840:1	Arhgap20	NA	NA	FALSE	FALSE	1	NA	FALSE
602	1	NA	1	0.875	0.125	TRUE	Inf	1 vs 2	0.25	1 vs 2	1	0.75	Col6a2:chr10:76595730-76596079:-1, Col6a2:chr10:76595695-76596368:-1	Col6a2	NA	NA	FALSE	FALSE	1	NA	FALSE
603	0.266556	NA	0.5	0.375	0.125	TRUE	0.657556	2 vs 1	0.25	3 vs 1	0	-0.25	Igsf9b:chr9:27350571-27351277:1, Igsf9b:chr9:27355989-27356372:1, Igsf9b:chr9:27357210-27357549:1	Igsf9b	NA	NA	FALSE	FALSE	0.266556	NA	FALSE
604	1	NA	0.5	0.375	0.125	TRUE	0.510826	1 vs 2	0.25	1 vs 2	0	-0.25	Kcnh2:chr5:24319642-24319880:-1, Kcnh2:chr5:24319548-24320029:-1	Kcnh2	NA	NA	FALSE	FALSE	1	NA	FALSE
605	0.522956	NA	0.5	0.375	0.125	TRUE	0.510826	1 vs 2	0.25	1 vs 2	0	-0.25	Letm2:chr8:25578578-25578832:-1, Letm2:chr8:25587146-25587475:-1	Letm2	NA	NA	FALSE	FALSE	0.522956	NA	FALSE
606	0.31817	0.495639	0.642857	0.640476	0.00238095	TRUE	#NAME?	5 vs 1	0.25	4 vs 2	0.107143	-0.142857	Nbeal1:chr1:60331109-60331462:1, Nbeal1:chr1:60331339-60331725:1, Nbeal1:chr1:60331483-60331751:1, Nbeal1:chr1:60337036-60337316:1, Nbeal1:chr1:60337825-60337982:1, Nbeal1:chr1:60337932-60338328:1	Nbeal1	NA	NA	FALSE	FALSE	0.495639	NA	FALSE
607	0.160975	0.347752	0.233333	0.17284	0.0604938	TRUE	1.16315	2 vs 3	0.249383	2 vs 3	-0.466667	-0.716049	Fam81a:chr9:70088550-70088850:-1, Fam81a:chr9:70089795-70090135:-1, Fam81a:chr9:70090398-70090866:-1	Fam81a	NA	NA	FALSE	FALSE	0.347752	NA	FALSE
608	0.268719	NA	0.647887	0.602941	0.0449461	TRUE	0.579334	3 vs 2	0.249379	3 vs 2	0.0140845	-0.235294	Xiap:chrX:42107729-42108217:1, Xiap:chrX:42109100-42109590:1, Xiap:chrX:42109342-42109664:1	Xiap	NA	NA	FALSE	FALSE	0.268719	NA	FALSE
609	0.180963	NA	0.444444	0.333333	0.111111	TRUE	Inf	1 vs 2	0.248656	1 vs 4	-0.0416667	-0.290323	Zfp800:chr6:28239853-28240075:-1, Zfp800:chr6:28239891-28240268:-1, Zfp800:chr6:28240042-28240765:-1, Zfp800:chr6:28242918-28243199:-1	Zfp800	NA	NA	FALSE	FALSE	0.180963	NA	FALSE
610	0.225178	0.44211	0.617188	0.521028	0.0961595	TRUE	1.54045	2 vs 1	0.24854	5 vs 3	-0.21875	-0.46729	Myadm:chr7:3298169-3298480:1, Myadm:chr7:3298616-3298914:1, Myadm:chr7:3298805-3299322:1, Myadm:chr7:3299140-3299369:1, Myadm:chr7:3300085-3300404:1	Myadm	NA	NA	FALSE	FALSE	0.44211	NA	FALSE
611	0.00619296	0.0178907	0.716567	0.662474	0.0540931	TRUE	1.25391	2 vs 3	0.248409	2 vs 3	0.562874	0.314465	Ikzf5:chr7:131388602-131389011:-1, Ikzf5:chr7:131388949-131389391:-1, Ikzf5:chr7:131390315-131390737:-1, Ikzf5:chr7:131391077-131391565:-1	Ikzf5	NA	NA	FALSE	FALSE	0.0178907	NA	FALSE
612	0.0252644	0.0676243	0.805085	0.680952	0.124132	TRUE	1.42139	2 vs 3	0.248265	1 vs 3	0.610169	0.361905	Jmy:chr13:93430097-93430440:-1, Jmy:chr13:93433047-93433904:-1, Jmy:chr13:93433810-93434307:-1	Jmy	NA	NA	FALSE	FALSE	0.0676243	NA	FALSE
613	0.0670828	0.0755965	0.754023	0.702381	0.051642	TRUE	1.06224	2 vs 4	0.248189	2 vs 4	0.344828	0.0966387	Zfp113:chr5:138139693-138140043:-1, Zfp113:chr5:138141480-138141882:-1, Zfp113:chr5:138141449-138142248:-1, Zfp113:chr5:138143084-138143443:-1, Zfp113:chr5:138142902-138143889:-1, Zfp113:chr5:138150922-138151182:-1, Zfp113:chr5:138150976-138151504:-1	Zfp113	NA	NA	FALSE	FALSE	0.0755965	NA	FALSE
614	0.226636	NA	0.3125	0.188679	0.123821	TRUE	0.670158	2 vs 1	0.247642	2 vs 1	-0.375	-0.622642	Zfp97:chr17:17146473-17146843:1, Zfp97:chr17:17146823-17147158:1	Zfp97	NA	NA	FALSE	FALSE	0.226636	NA	FALSE
615	0.0123354	0.0261458	0.510791	0.383117	0.127674	TRUE	0.932951	1 vs 3	0.247454	1 vs 3	0.00719424	-0.24026	Irak1:chrX:74013891-74014272:-1, Irak1:chrX:74014257-74014590:-1, Irak1:chrX:74014820-74015061:-1, Irak1:chrX:74014696-74015426:-1	Irak1	NA	NA	FALSE	FALSE	0.0261458	NA	FALSE
616	0.0208483	0.026161	0.404762	0.28122	0.123542	TRUE	0.86354	3 vs 2	0.247084	3 vs 1	-0.190476	-0.437561	Phactr1:chr13:43135117-43135290:1, Phactr1:chr13:43137923-43138526:1, Phactr1:chr13:43138182-43138526:1	Phactr1	NA	NA	FALSE	FALSE	0.026161	NA	FALSE
617	0.147602	NA	0.463415	0.340027	0.123388	TRUE	0.516571	2 vs 1	0.246776	2 vs 1	-0.0731707	-0.319946	Atl1:chr12:69963098-69963895:1, Atl1:chr12:69963752-69964000:1	Atl1	NA	NA	FALSE	FALSE	0.147602	NA	FALSE
618	1	NA	1	0.876623	0.123377	TRUE	Inf	1 vs 2	0.246753	1 vs 2	1	0.753247	Slc45a1:chr4:150629375-150629733:-1, Slc45a1:chr4:150630002-150630336:-1	Slc45a1	NA	NA	FALSE	FALSE	1	NA	FALSE
619	0.454958	NA	0.894737	0.771429	0.123308	TRUE	0.923671	1 vs 2	0.246617	1 vs 2	0.789474	0.542857	Kcnab2:chr4:152390742-152391021:-1, Kcnab2:chr4:152390742-152391301:-1	Kcnab2	NA	NA	FALSE	FALSE	0.454958	NA	FALSE
620	2.67304e-05	6.84702e-05	0.873239	0.799046	0.0741938	FALSE	0.68868	1 vs 2	0.246474	1 vs 2	0.611268	0.364793	Gmcl1:chr6:86691758-86692125:-1, Gmcl1:chr6:86692266-86692597:-1, Gmcl1:chr6:86720055-86720459:-1	Gmcl1	0.000196229	0.00050253	TRUE	TRUE	6.84702e-05	0.000533479	TRUE
621	0.329906	0.469636	0.625	0.501767	0.123233	TRUE	0.503758	1 vs 2	0.246466	1 vs 2	0.25	0.00353357	Ldb2:chr5:44472123-44472493:-1, Ldb2:chr5:44472782-44473137:-1	Ldb2	NA	NA	FALSE	FALSE	0.469636	NA	FALSE
622	0.460784	NA	0.666667	0.543478	0.123188	TRUE	0.518794	1 vs 2	0.246377	1 vs 2	0.333333	0.0869565	Kazn:chr4:142139240-142139655:-1, Kazn:chr4:142140752-142141165:-1	Kazn	NA	NA	FALSE	FALSE	0.460784	NA	FALSE
623	0.0304277	0.0998366	0.519928	0.49932	0.0206078	TRUE	-0.757442	3 vs 4	0.246029	2 vs 3	0.168478	-0.077551	Usp7:chr16:8688722-8689078:-1, Usp7:chr16:8689578-8689902:-1, Usp7:chr16:8689918-8690308:-1, Usp7:chr16:8690307-8691024:-1	Usp7	NA	NA	FALSE	FALSE	0.0998366	NA	FALSE
624	0.184102	0.253655	0.258503	0.264124	-0.00562089	TRUE	-1.687	4 vs 6	0.245936	6 vs 7	0.55102	0.305085	Zfp931:chr2:178060197-178060505:-1, Zfp931:chr2:178064948-178065332:-1, Zfp931:chr2:178065561-178065983:-1, Zfp931:chr2:178066356-178066857:-1, Zfp931:chr2:178068262-178068678:-1, Zfp931:chr2:178068382-178068944:-1, Zfp931:chr2:178069403-178069812:-1	Zfp931	NA	NA	FALSE	FALSE	0.253655	NA	FALSE
625	0.136164	NA	0.448276	0.442568	0.00570829	TRUE	#NAME?	1 vs 2	0.245806	2 vs 3	0.793103	0.547297	Ntn3:chr17:24201992-24202360:-1, Ntn3:chr17:24203840-24204192:-1, Ntn3:chr17:24206198-24206540:-1	Ntn3	NA	NA	FALSE	FALSE	0.136164	NA	FALSE
626	0.183976	NA	0.958333	0.835821	0.122512	TRUE	1.50804	1 vs 2	0.245025	1 vs 2	0.916667	0.671642	Bend6:chr1:33852052-33852416:-1, Bend6:chr1:33852286-33852994:-1	Bend6	NA	NA	FALSE	FALSE	0.183976	NA	FALSE
627	0.815593	NA	0.5	0.391837	0.108163	TRUE	1.17007	3 vs 2	0.244898	3 vs 2	0	-0.244898	Gas7:chr11:67684578-67685012:1, Gas7:chr11:67688351-67688580:1, Gas7:chr11:67688523-67688793:1, Gas7:chr11:67688589-67688992:1	Gas7	NA	NA	FALSE	FALSE	0.815593	NA	FALSE
628	1.1541e-06	2.84361e-06	0.426653	0.331015	0.0956382	TRUE	1.02976	1 vs 5	0.244803	4 vs 5	0.0123967	-0.232406	Fbxo28:chr1:182313049-182313444:-1, Fbxo28:chr1:182314059-182314398:-1, Fbxo28:chr1:182315152-182315552:-1, Fbxo28:chr1:182315459-182316015:-1, Fbxo28:chr1:182316495-182316850:-1	Fbxo28	NA	NA	FALSE	FALSE	2.84361e-06	NA	FALSE
629	0.121816	NA	0.239437	0.125	0.114437	TRUE	1.02864	2 vs 3	0.244558	2 vs 3	-0.528169	-0.772727	Tpp1:chr7:105744811-105745138:-1, Tpp1:chr7:105745911-105746191:-1, Tpp1:chr7:105746024-105746470:-1	Tpp1	NA	NA	FALSE	FALSE	0.121816	NA	FALSE
630	0.0728889	0.160311	0.630769	0.508785	0.121984	TRUE	0.500373	2 vs 1	0.243968	2 vs 1	0.261538	0.0175707	Nrxn2:chr19:6531938-6532289:1, Nrxn2:chr19:6532878-6533199:1	Nrxn2	NA	NA	FALSE	FALSE	0.160311	NA	FALSE
631	3.33969e-15	1.10436e-12	0.264106	0.142361	0.121745	FALSE	0.771079	1 vs 2	0.243489	1 vs 2	-0.471789	-0.715278	Ythdf2:chr4:132186035-132186421:-1, Ythdf2:chr4:132186790-132187009:-1	Ythdf2	7.57395e-14	2.19242e-11	TRUE	TRUE	1.10436e-12	2.3572e-11	TRUE
632	0.283157	0.400943	0.604167	0.482558	0.121609	TRUE	0.623554	1 vs 3	0.243217	1 vs 3	0.208333	-0.0348837	Ndor1:chr2:25244812-25245115:-1, Ndor1:chr2:25244812-25245311:-1, Ndor1:chr2:25247180-25247577:-1	Ndor1	NA	NA	FALSE	FALSE	0.400943	NA	FALSE
633	0.035759	0.142395	0.485294	0.401481	0.0838126	TRUE	2.51881	6 vs 3	0.242919	6 vs 2	0.205882	-0.037037	2210418O10Rik:chr2:176235527-176235844:1, 2210418O10Rik:chr2:176237901-176238942:1, 2210418O10Rik:chr2:176238412-176238719:1, 2210418O10Rik:chr2:176239107-176239683:1, 2210418O10Rik:chr2:176239609-176240330:1, 2210418O10Rik:chr2:176239965-176240330:1	2210418O10Rik	NA	NA	FALSE	FALSE	0.142395	NA	FALSE
634	0.590027	NA	0.666667	0.6	0.0666667	TRUE	Inf	1 vs 2	0.242857	5 vs 7	0.142857	-0.1	Col4a1:chr8:11198445-11198724:-1, Col4a1:chr8:11198423-11199017:-1, Col4a1:chr8:11198582-11199385:-1, Col4a1:chr8:11199106-11199299:-1, Col4a1:chr8:11199160-11199461:-1, Col4a1:chr8:11199478-11199843:-1, Col4a1:chr8:11199669-11199924:-1	Col4a1	NA	NA	FALSE	FALSE	0.590027	NA	FALSE
635	1.84707e-07	1.31963e-08	0.97037	0.84897	0.1214	FALSE	1.76236	2 vs 1	0.2428	2 vs 1	0.940741	0.697941	Arrdc3:chr13:80893484-80893916:1, Arrdc3:chr13:80895632-80896091:1	Arrdc3	1.90714e-06	1.86957e-07	TRUE	TRUE	1.84707e-07	2.31111e-06	TRUE
636	0.00233529	0.0245799	0.79668	0.736581	0.0601	FALSE	0.530479	1 vs 2	0.242615	1 vs 2	0.311203	0.0685885	Dusp8:chr7:142079487-142079842:-1, Dusp8:chr7:142081491-142081808:-1, Dusp8:chr7:142081379-142082133:-1	Dusp8	0.0105545	0.0821137	TRUE	FALSE	0.0245799	0.0903514	FALSE
637	0.00723488	0.0175446	0.303922	0.249383	0.0545389	FALSE	0.577388	2 vs 1	0.242556	2 vs 1	-0.0784314	-0.320988	Nampt:chr12:32850672-32851142:1, Nampt:chr12:32851205-32851638:1, Nampt:chr12:32853010-32853344:1	Nampt	0.0278433	0.0623978	TRUE	FALSE	0.0175446	0.0689832	FALSE
638	0.540484	NA	0.370968	0.25	0.120968	TRUE	0.570545	1 vs 2	0.241935	1 vs 2	-0.258065	-0.5	Ddias:chr7:92857522-92857743:-1, Ddias:chr7:92857539-92857948:-1	Ddias	NA	NA	FALSE	FALSE	0.540484	NA	FALSE
639	0.0363061	0.0566908	0.461279	0.431159	0.03012	TRUE	1.36828	1 vs 2	0.241656	1 vs 2	0.252525	0.0108696	Smc5:chr19:23206435-23206741:-1, Smc5:chr19:23206887-23207129:-1, Smc5:chr19:23206791-23207423:-1, Smc5:chr19:23208733-23209031:-1	Smc5	NA	NA	FALSE	FALSE	0.0566908	NA	FALSE
640	0.279322	0.454645	0.613095	0.492308	0.120788	TRUE	0.551845	3 vs 1	0.241575	3 vs 1	0.22619	-0.0153846	Ptgr2:chr12:84313884-84314053:1, Ptgr2:chr12:84314468-84314885:1, Ptgr2:chr12:84315436-84315832:1	Ptgr2	NA	NA	FALSE	FALSE	0.454645	NA	FALSE
641	0.313183	NA	0.755208	0.661538	0.0936699	TRUE	0.723606	1 vs 4	0.240946	1 vs 3	0.328125	0.0871795	Atf7:chr15:102528570-102529035:-1, Atf7:chr15:102530311-102530629:-1, Atf7:chr15:102533505-102533967:-1, Atf7:chr15:102537323-102537634:-1	Atf7	NA	NA	FALSE	FALSE	0.313183	NA	FALSE
642	3.72586e-05	7.46413e-05	0.611888	0.476864	0.135024	TRUE	0.899893	5 vs 1	0.240836	5 vs 1	0.132867	-0.107969	Ppt1:chr4:122848619-122848943:1, Ppt1:chr4:122857498-122858135:1, Ppt1:chr4:122857992-122858489:1, Ppt1:chr4:122858658-122858974:1, Ppt1:chr4:122858433-122859175:1	Ppt1	NA	NA	FALSE	FALSE	7.46413e-05	NA	FALSE
643	1.22444e-43	1.65135e-19	0.481736	0.388786	0.09295	FALSE	1.09362	1 vs 5	0.240523	1 vs 6	0.0584443	-0.182079	Nfix:chr8:84704712-84705160:-1, Nfix:chr8:84705249-84705738:-1, Nfix:chr8:84706040-84706513:-1, Nfix:chr8:84706329-84706488:-1, Nfix:chr8:84706389-84706839:-1, Nfix:chr8:84708627-84708696:-1, Nfix:chr8:84708354-84709101:-1	Nfix	1.00325e-41	5.12765e-18	TRUE	TRUE	1.65135e-19	5.51898e-18	TRUE
644	0.0935897	0.0115575	0.659722	0.570466	0.0892565	TRUE	1.37793	7 vs 3	0.239869	7 vs 3	0.122222	-0.117647	Selenoi:chr5:30266901-30267257:1, Selenoi:chr5:30267892-30268439:1, Selenoi:chr5:30268117-30268423:1, Selenoi:chr5:30267789-30267958:1, Selenoi:chr5:30268296-30268593:1, Selenoi:chr5:30268328-30269017:1, Selenoi:chr5:30268649-30268936:1, Selenoi:chr5:30271297-30271619:1, Selenoi:chr5:30272052-30272430:1	Selenoi	NA	NA	FALSE	FALSE	0.0935897	NA	FALSE
645	0.629154	NA	0.614035	0.547101	0.0669336	TRUE	Inf	1 vs 2	0.237414	1 vs 3	0.0526316	-0.184783	Jazf1:chr6:52768021-52768421:-1, Jazf1:chr6:52769716-52769879:-1, Jazf1:chr6:52769780-52770385:-1, Jazf1:chr6:52770166-52770437:-1	Jazf1	NA	NA	FALSE	FALSE	0.629154	NA	FALSE
646	0.453632	NA	0.444444	0.348485	0.0959596	TRUE	2.0149	4 vs 1	0.237374	4 vs 1	0.0555556	-0.181818	Qpct:chr17:79089568-79090140:1, Qpct:chr17:79089904-79090144:1, Qpct:chr17:79089966-79090203:1, Qpct:chr17:79090005-79090385:1	Qpct	NA	NA	FALSE	FALSE	0.453632	NA	FALSE
647	0.19795	NA	1	0.881356	0.118644	TRUE	Inf	1 vs 2	0.237288	1 vs 2	1	0.762712	Zswim9:chr7:13258960-13259299:-1, Zswim9:chr7:13259102-13259583:-1	Zswim9	NA	NA	FALSE	FALSE	0.19795	NA	FALSE
648	1	NA	0.5	0.381443	0.118557	TRUE	0.483427	1 vs 2	0.237113	1 vs 2	0	-0.237113	Fbn2:chr18:58008600-58008999:-1, Fbn2:chr18:58010145-58010460:-1	Fbn2	NA	NA	FALSE	FALSE	1	NA	FALSE
649	0.503816	NA	0.944444	0.826087	0.118357	TRUE	1.27507	2 vs 1	0.236715	2 vs 1	0.888889	0.652174	Foxj2:chr6:122844775-122845359:1, Foxj2:chr6:122845018-122845354:1	Foxj2	NA	NA	FALSE	FALSE	0.503816	NA	FALSE
650	0.0194538	0.00399567	0.757102	0.659871	0.097231	TRUE	Inf	2 vs 1	0.236686	7 vs 2	0.511364	0.274678	Epha7:chr4:28946165-28946414:1, Epha7:chr4:28946230-28946529:1, Epha7:chr4:28946638-28947019:1, Epha7:chr4:28946715-28947044:1, Epha7:chr4:28963888-28964097:1, Epha7:chr4:28963953-28964453:1, Epha7:chr4:28964492-28964721:1, Epha7:chr4:28966150-28966275:1, Epha7:chr4:28967111-28967506:1	Epha7	NA	NA	FALSE	FALSE	0.0194538	NA	FALSE
651	0.027716	0.158674	0.294118	0.287356	0.00676133	TRUE	#NAME?	1 vs 3	0.23597	3 vs 4	-0.235294	-0.471264	Rbms1:chr2:60750192-60750515:-1, Rbms1:chr2:60751374-60751681:-1, Rbms1:chr2:60752021-60752645:-1, Rbms1:chr2:60752696-60753052:-1, Rbms1:chr2:60753685-60753822:-1	Rbms1	NA	NA	FALSE	FALSE	0.158674	NA	FALSE
652	0.00589526	0.0889296	0.5	0.462085	0.0379147	TRUE	1.37391	2 vs 3	0.23582	2 vs 3	-0.209677	-0.445498	Smim19:chr8:22462589-22462933:-1, Smim19:chr8:22462659-22463077:-1, Smim19:chr8:22462951-22463394:-1	Smim19	NA	NA	FALSE	FALSE	0.0889296	NA	FALSE
653	0.113859	0.257263	0.42029	0.302469	0.117821	TRUE	0.513984	2 vs 1	0.235641	2 vs 1	-0.15942	-0.395062	Tafa5:chr15:87757880-87758296:1, Tafa5:chr15:87759006-87759364:1	Tafa5	NA	NA	FALSE	FALSE	0.257263	NA	FALSE
654	0.000294523	0.00119007	0.651017	0.62249	0.0285273	FALSE	1.62668	1 vs 3	0.235251	1 vs 2	-0.511737	-0.746988	Pdcd6ip:chr9:113651716-113652090:-1, Pdcd6ip:chr9:113654462-113654790:-1, Pdcd6ip:chr9:113654291-113654448:-1, Pdcd6ip:chr9:113654398-113655084:-1	Pdcd6ip	0.00169251	0.00630709	TRUE	TRUE	0.00119007	0.0067775	TRUE
655	0.374379	NA	0.813586	0.7	0.113586	TRUE	0.776582	1 vs 4	0.235229	1 vs 4	0.601896	0.366667	Hopx:chr5:77086983-77087277:-1, Hopx:chr5:77087195-77087407:-1, Hopx:chr5:77087131-77087675:-1, Hopx:chr5:77087599-77087858:-1	Hopx	NA	NA	FALSE	FALSE	0.374379	NA	FALSE
656	0.0860004	0.0413099	0.752101	0.77095	-0.0188489	TRUE	-1.22536	2 vs 4	0.235012	1 vs 2	0.134454	-0.100559	Pus7:chr5:23740641-23740962:-1, Pus7:chr5:23740905-23741226:-1, Pus7:chr5:23740862-23741553:-1, Pus7:chr5:23740842-23741875:-1, Pus7:chr5:23741737-23742019:-1	Pus7	NA	NA	FALSE	FALSE	0.0860004	NA	FALSE
657	3.80509e-06	1.63428e-05	0.446667	0.413889	0.0327778	FALSE	0.605788	2 vs 1	0.234921	2 vs 1	0.466667	0.231746	Copg1:chr6:87890368-87890785:1, Copg1:chr6:87912135-87912573:1, Copg1:chr6:87913228-87913595:1	Copg1	3.24327e-05	0.000134177	TRUE	TRUE	1.63428e-05	0.000143141	TRUE
658	0.00510957	0.0178876	0.547619	0.390741	0.156878	TRUE	2.05412	5 vs 1	0.234921	4 vs 1	0.32381	0.0888889	Zfp968:chr2:175381336-175381604:1, Zfp968:chr2:175381526-175381770:1, Zfp968:chr2:175381311-175382102:1, Zfp968:chr2:175387995-175388209:1, Zfp968:chr2:175388390-175389229:1	Zfp968	NA	NA	FALSE	FALSE	0.0178876	NA	FALSE
659	0.724602	NA	0.4	0.282609	0.117391	TRUE	0.526093	1 vs 2	0.234783	1 vs 2	-0.2	-0.434783	Zfyve1:chr12:83547542-83548043:-1, Zfyve1:chr12:83547863-83548179:-1	Zfyve1	NA	NA	FALSE	FALSE	0.724602	NA	FALSE
660	0.732734	NA	0.8	0.682927	0.117073	TRUE	0.619039	1 vs 2	0.234146	1 vs 2	0.6	0.365854	Relb:chr7:19604849-19605042:-1, Relb:chr7:19606182-19606555:-1	Relb	NA	NA	FALSE	FALSE	0.732734	NA	FALSE
661	0.044917	0.02775	0.319675	0.281046	0.0386294	TRUE	-1.79176	9 vs 3	0.232949	5 vs 2	-0.0863787	-0.319328	Hspa4l:chr3:40789213-40789600:1, Hspa4l:chr3:40790076-40790458:1, Hspa4l:chr3:40790584-40791632:1, Hspa4l:chr3:40791422-40791911:1, Hspa4l:chr3:40793568-40793909:1, Hspa4l:chr3:40794641-40794991:1, Hspa4l:chr3:40794817-40795025:1, Hspa4l:chr3:40794463-40795444:1, Hspa4l:chr3:40795506-40796115:1, Hspa4l:chr3:40795737-40796131:1	Hspa4l	NA	NA	FALSE	FALSE	0.044917	NA	FALSE
662	0.64835	NA	0.857143	0.740741	0.116402	TRUE	0.741937	1 vs 2	0.232804	1 vs 2	0.714286	0.481481	B3gntl1:chr11:121616156-121616583:-1, B3gntl1:chr11:121616736-121617106:-1	B3gntl1	NA	NA	FALSE	FALSE	0.64835	NA	FALSE
663	0.00638587	0.0104986	0.369505	0.407787	-0.0382814	FALSE	-1.09931	4 vs 2	0.232661	2 vs 1	0.576923	0.344262	Cilk1:chr9:78125190-78125716:1, Cilk1:chr9:78167549-78167982:1, Cilk1:chr9:78168254-78168607:1, Cilk1:chr9:78170061-78170521:1, Cilk1:chr9:78171754-78172126:1	Cilk1	0.0249925	0.0404255	TRUE	TRUE	0.0104986	0.0453512	TRUE
664	0.471312	NA	0.608696	0.492537	0.116158	TRUE	0.471686	2 vs 1	0.232317	2 vs 1	0.217391	-0.0149254	Dclre1c:chr2:3453412-3453889:1, Dclre1c:chr2:3454976-3455366:1	Dclre1c	NA	NA	FALSE	FALSE	0.471312	NA	FALSE
665	0.625784	NA	0.928571	0.8125	0.116071	TRUE	Inf	2 vs 1	0.232143	3 vs 1	0.857143	0.625	Lhx5:chr5:120440355-120440715:1, Lhx5:chr5:120440127-120441020:1, Lhx5:chr5:120440867-120441312:1	Lhx5	NA	NA	FALSE	FALSE	0.625784	NA	FALSE
666	0.575274	NA	0.333333	0.217391	0.115942	TRUE	0.587787	2 vs 1	0.231884	2 vs 1	-0.333333	-0.565217	Nckipsd:chr9:108818041-108818447:1, Nckipsd:chr9:108818548-108818860:1	Nckipsd	NA	NA	FALSE	FALSE	0.575274	NA	FALSE
667	0.000329534	0.000364277	0.750853	0.635427	0.115426	FALSE	0.547596	2 vs 1	0.230852	2 vs 1	0.501706	0.270855	Mex3b:chr7:82870400-82870792:1, Mex3b:chr7:82871171-82871576:1	Mex3b	0.0018518	0.0022002	TRUE	TRUE	0.000364277	0.00237247	TRUE
668	0.858295	NA	1	0.885057	0.114943	TRUE	Inf	4 vs 1	0.230769	4 vs 1	1	0.769231	Lrfn5:chr12:61844705-61845259:1, Lrfn5:chr12:61845046-61845202:1, Lrfn5:chr12:61845124-61845445:1, Lrfn5:chr12:61857535-61857931:1	Lrfn5	NA	NA	FALSE	FALSE	0.858295	NA	FALSE
669	0.000136011	0.000254425	0.485278	0.4121	0.0731773	TRUE	1.94591	13 vs 10	0.230731	13 vs 7	0.203333	-0.0273973	Rint1:chr5:23788180-23788525:1, Rint1:chr5:23789188-23789637:1, Rint1:chr5:23789634-23790044:1, Rint1:chr5:23790489-23790806:1, Rint1:chr5:23793627-23793889:1, Rint1:chr5:23819365-23819633:1, Rint1:chr5:23819394-23819824:1, Rint1:chr5:23819682-23819928:1, Rint1:chr5:23819767-23820407:1, Rint1:chr5:23819950-23820379:1, Rint1:chr5:23820926-23821197:1, Rint1:chr5:23821159-23821606:1, Rint1:chr5:2382…	Rint1	NA	NA	FALSE	FALSE	0.000254425	NA	FALSE
670	0.134447	0.0479695	0.634921	0.622047	0.0128734	TRUE	#NAME?	5 vs 1	0.230596	4 vs 2	0.285714	0.0551181	Map3k7:chr4:32020206-32020434:1, Map3k7:chr4:32020068-32021012:1, Map3k7:chr4:32020469-32020809:1, Map3k7:chr4:32021966-32022512:1, Map3k7:chr4:32022440-32022572:1, Map3k7:chr4:32022956-32023425:1, Map3k7:chr4:32023143-32023477:1	Map3k7	NA	NA	FALSE	FALSE	0.134447	NA	FALSE
671	0.479499	NA	0.181818	0.0666667	0.115152	TRUE	1.13498	2 vs 1	0.230303	2 vs 1	-0.636364	-0.866667	Frrs1:chr3:116903101-116903531:1, Frrs1:chr3:116907308-116907752:1	Frrs1	NA	NA	FALSE	FALSE	0.479499	NA	FALSE
672	0.105567	0.198024	0.447368	0.332524	0.114844	TRUE	0.684179	1 vs 3	0.229688	1 vs 3	-0.105263	-0.334951	Zfp866:chr8:69761267-69761706:-1, Zfp866:chr8:69763824-69764167:-1, Zfp866:chr8:69764721-69765141:-1	Zfp866	NA	NA	FALSE	FALSE	0.198024	NA	FALSE
673	2.89825e-07	3.15194e-06	0.420376	0.361157	0.0592184	FALSE	1.17071	3 vs 1	0.228957	3 vs 1	-0.308605	-0.537563	Ubfd1:chr7:122078450-122078860:1, Ubfd1:chr7:122079129-122079325:1, Ubfd1:chr7:122078725-122079197:1, Ubfd1:chr7:122081836-122082193:1	Ubfd1	2.87561e-06	2.99373e-05	TRUE	TRUE	3.15194e-06	3.17696e-05	TRUE
674	0.0762164	0.0271396	0.763964	0.671351	0.0926126	TRUE	1.60944	3 vs 4	0.228829	1 vs 5	0.531532	0.302703	Gm49336:chr14:60218063-60218405:-1, Gm49336:chr14:60218106-60218523:-1, Gm49336:chr14:60217962-60219078:-1, Gm49336:chr14:60218401-60218735:-1, Gm49336:chr14:60219464-60219805:-1, Gm49336:chr14:60219556-60220471:-1	Gm49336	NA	NA	FALSE	FALSE	0.0762164	NA	FALSE
675	0.0408681	0.133741	0.578095	0.574165	0.00393061	FALSE	-1.09061	4 vs 6	0.228432	3 vs 4	0.142857	-0.0855746	Abi1:chr2:22940062-22940331:-1, Abi1:chr2:22940095-22940455:-1, Abi1:chr2:22940401-22940639:-1, Abi1:chr2:22941239-22941549:-1, Abi1:chr2:22941423-22941596:-1, Abi1:chr2:22941064-22941948:-1, Abi1:chr2:22941508-22941937:-1	Abi1	0.114241	0.285392	FALSE	FALSE	0.133741	0.318969	FALSE
676	0.000321197	0.00165562	0.853659	0.739474	0.114185	FALSE	0.720354	2 vs 1	0.22837	2 vs 1	0.707317	0.478947	Ykt6:chr11:5965939-5966311:1, Ykt6:chr11:5967435-5967781:1	Ykt6	0.00182076	0.00847763	TRUE	TRUE	0.00165562	0.00914192	TRUE
677	0.0909488	0.129102	0.819672	0.70557	0.114102	TRUE	0.640162	1 vs 2	0.228204	1 vs 2	0.639344	0.411141	Smap2:chr4:120968305-120968702:-1, Smap2:chr4:120969518-120969733:-1	Smap2	NA	NA	FALSE	FALSE	0.129102	NA	FALSE
678	0.471309	NA	0.180723	0.0666667	0.114056	TRUE	1.1276	1 vs 2	0.228112	1 vs 2	-0.638554	-0.866667	Blm:chr7:80453834-80454199:-1, Blm:chr7:80455017-80455426:-1	Blm	NA	NA	FALSE	FALSE	0.471309	NA	FALSE
679	1	NA	0.5	0.385965	0.114035	TRUE	0.464306	2 vs 1	0.22807	2 vs 1	0	-0.22807	Bdnf:chr2:109724144-109724475:1, Bdnf:chr2:109723894-109724883:1	Bdnf	NA	NA	FALSE	FALSE	1	NA	FALSE
680	0.00076429	0.00255766	0.774038	0.660099	0.11394	FALSE	0.567523	1 vs 2	0.22788	1 vs 2	0.548077	0.320197	H4c9:chr13:22040575-22041044:-1, H4c9:chr13:22040851-22041345:-1	H4c9	0.00389819	0.0123399	TRUE	TRUE	0.00255766	0.0134781	TRUE
681	0.461534	NA	0.533333	0.522541	0.0107923	TRUE	Inf	1 vs 2	0.227322	3 vs 4	-0.133333	-0.360656	Ezh1:chr11:101191106-101191451:-1, Ezh1:chr11:101191106-101191781:-1, Ezh1:chr11:101197386-101197693:-1, Ezh1:chr11:101198136-101198486:-1, Ezh1:chr11:101199010-101199399:-1	Ezh1	NA	NA	FALSE	FALSE	0.461534	NA	FALSE
682	0.979013	NA	0.75	0.636364	0.113636	TRUE	0.538997	2 vs 1	0.227273	2 vs 1	0.5	0.272727	Slc38a6:chr12:73352966-73353348:1, Slc38a6:chr12:73353686-73354053:1	Slc38a6	NA	NA	FALSE	FALSE	0.979013	NA	FALSE
683	0.0017364	0.00290863	0.557377	0.443787	0.11359	TRUE	1.5433	3 vs 1	0.22718	3 vs 1	0.114754	-0.112426	Virma:chr4:11527228-11527613:1, Virma:chr4:11549533-11549901:1, Virma:chr4:11550286-11550709:1	Virma	NA	NA	FALSE	FALSE	0.00290863	NA	FALSE
684	0.149096	NA	0.970588	0.857143	0.113445	TRUE	1.70475	1 vs 2	0.226891	1 vs 2	0.941176	0.714286	Ccdc28a:chr10:18213675-18214025:-1, Ccdc28a:chr10:18218223-18218459:-1	Ccdc28a	NA	NA	FALSE	FALSE	0.149096	NA	FALSE
685	2.49637e-17	1.32788e-15	0.427766	0.424074	0.00369177	FALSE	-0.7906	1 vs 2	0.226811	2 vs 3	0.409774	0.182963	Tmed10:chr12:85340602-85340950:-1, Tmed10:chr12:85342765-85343161:-1, Tmed10:chr12:85343144-85343577:-1	Tmed10	6.60499e-16	3.38541e-14	TRUE	TRUE	1.32788e-15	3.62669e-14	TRUE
686	0.17543	NA	0.646825	0.550725	0.0961008	TRUE	2.26176	4 vs 3	0.226708	4 vs 1	0.357143	0.130435	Maml2:chr9:13706886-13707445:1, Maml2:chr9:13707215-13707506:1, Maml2:chr9:13708824-13709045:1, Maml2:chr9:13709017-13709424:1	Maml2	NA	NA	FALSE	FALSE	0.17543	NA	FALSE
687	0.000693016	0.00233167	0.285211	0.206689	0.0785227	FALSE	Inf	4 vs 1	0.226371	5 vs 1	-0.359155	-0.585526	Zfp955b:chr17:33303408-33303857:1, Zfp955b:chr17:33303796-33304184:1, Zfp955b:chr17:33304028-33304282:1, Zfp955b:chr17:33304095-33304475:1, Zfp955b:chr17:33304171-33304760:1, Zfp955b:chr17:33304351-33304684:1, Zfp955b:chr17:33306081-33306867:1	Zfp955b	0.00357777	0.0115017	TRUE	TRUE	0.00233167	0.0124421	TRUE
688	0.0133724	0.013551	0.619048	0.533999	0.0850489	TRUE	1.22132	3 vs 8	0.225764	2 vs 8	0.3	0.0742358	Pmepa1:chr2:173224458-173224813:-1, Pmepa1:chr2:173226792-173227132:-1, Pmepa1:chr2:173226714-173227364:-1, Pmepa1:chr2:173227147-173227341:-1, Pmepa1:chr2:173227184-173227665:-1, Pmepa1:chr2:173227360-173227684:-1, Pmepa1:chr2:173227503-173228253:-1, Pmepa1:chr2:173227817-173228070:-1	Pmepa1	NA	NA	FALSE	FALSE	0.013551	NA	FALSE
689	2.17238e-37	1.00428e-29	0.188623	0.0760513	0.112571	FALSE	1.03826	2 vs 1	0.225143	2 vs 1	-0.622754	-0.847897	Cirbp:chr10:80171272-80171699:1, Cirbp:chr10:80172584-80172776:1	Cirbp	1.19953e-35	5.06741e-28	TRUE	TRUE	1.00428e-29	5.31429e-28	TRUE
690	0.0456019	0.0468837	0.564626	0.490085	0.0745409	FALSE	-0.890973	4 vs 2	0.225126	6 vs 1	0.346939	0.121813	D10Wsu102e:chr10:83365845-83366044:1, D10Wsu102e:chr10:83365834-83366265:1, D10Wsu102e:chr10:83366124-83366565:1, D10Wsu102e:chr10:83367393-83368188:1, D10Wsu102e:chr10:83367641-83367981:1, D10Wsu102e:chr10:83368501-83368845:1, D10Wsu102e:chr10:83488174-83488505:1	D10Wsu102e	0.123651	0.132965	FALSE	FALSE	0.0468837	0.148504	FALSE
691	0.084261	0.170068	0.702857	0.663793	0.039064	TRUE	0.647103	1 vs 2	0.225123	1 vs 2	0.328571	0.103448	9430038I01Rik:chr7:137375515-137375960:-1, 9430038I01Rik:chr7:137376126-137376435:-1, 9430038I01Rik:chr7:137383014-137383327:-1, 9430038I01Rik:chr7:137387299-137387458:-1	9430038I01Rik	NA	NA	FALSE	FALSE	0.170068	NA	FALSE
692	0.250011	NA	0.619355	0.608264	0.0110904	TRUE	#NAME?	4 vs 1	0.225007	6 vs 5	0.258065	0.0330579	Rock2:chr12:16985006-16985321:1, Rock2:chr12:16985145-16985639:1, Rock2:chr12:16985348-16985895:1, Rock2:chr12:16985913-16986240:1, Rock2:chr12:16986082-16986671:1, Rock2:chr12:16987390-16987868:1	Rock2	NA	NA	FALSE	FALSE	0.250011	NA	FALSE
693	0.420667	NA	0.362069	0.333333	0.0287356	TRUE	0.980829	3 vs 2	0.22466	3 vs 2	0.103448	-0.121212	Scrn3:chr2:73320508-73320735:1, Scrn3:chr2:73335664-73335816:1, Scrn3:chr2:73337403-73337832:1	Scrn3	NA	NA	FALSE	FALSE	0.420667	NA	FALSE
694	0.52802	NA	0.766667	0.686901	0.0797657	TRUE	Inf	1 vs 6	0.224175	3 vs 6	0.166667	-0.057508	Unc5d:chr8:28646718-28647040:-1, Unc5d:chr8:28646769-28647220:-1, Unc5d:chr8:28648445-28649064:-1, Unc5d:chr8:28649225-28649533:-1, Unc5d:chr8:28650296-28650801:-1, Unc5d:chr8:28652387-28652741:-1	Unc5d	NA	NA	FALSE	FALSE	0.52802	NA	FALSE
695	0.450973	NA	0.421053	0.309237	0.111816	TRUE	0.485235	1 vs 2	0.223631	1 vs 2	-0.157895	-0.381526	Prkaa2:chr4:105029824-105030258:-1, Prkaa2:chr4:105034777-105035130:-1	Prkaa2	NA	NA	FALSE	FALSE	0.450973	NA	FALSE
696	0.0365779	0.00820241	0.600733	0.6	0.000732601	TRUE	-0.859938	2 vs 3	0.223443	1 vs 2	-0.10989	-0.333333	Lrp6:chr6:134446476-134446807:-1, Lrp6:chr6:134448815-134449090:-1, Lrp6:chr6:134450292-134450969:-1, Lrp6:chr6:134450481-134450758:-1	Lrp6	NA	NA	FALSE	FALSE	0.0365779	NA	FALSE
697	0.722793	NA	0.419355	0.307692	0.111663	TRUE	0.485508	1 vs 2	0.223325	1 vs 2	-0.16129	-0.384615	Spin4:chrX:95022519-95022851:-1, Spin4:chrX:95022668-95023188:-1	Spin4	NA	NA	FALSE	FALSE	0.722793	NA	FALSE
698	0.0643012	0.254476	0.540769	0.47619	0.0645788	TRUE	1.77716	4 vs 1	0.223297	3 vs 1	0.366154	0.142857	Creb5:chr6:53694034-53694381:1, Creb5:chr6:53695360-53695932:1, Creb5:chr6:53695700-53696002:1, Creb5:chr6:53697484-53697879:1, Creb5:chr6:53699983-53700376:1	Creb5	NA	NA	FALSE	FALSE	0.254476	NA	FALSE
699	0.478745	NA	0.954545	0.842995	0.11155	TRUE	Inf	2 vs 1	0.223101	3 vs 1	0.909091	0.68599	Syt16:chr12:74266970-74267622:1, Syt16:chr12:74267397-74267746:1, Syt16:chr12:74267547-74267909:1	Syt16	NA	NA	FALSE	FALSE	0.478745	NA	FALSE
700	0.187971	NA	0.677419	0.565891	0.111528	TRUE	0.47683	1 vs 2	0.223056	1 vs 2	0.354839	0.131783	Xxylt1:chr16:30955139-30955517:-1, Xxylt1:chr16:30955519-30956029:-1	Xxylt1	NA	NA	FALSE	FALSE	0.187971	NA	FALSE
701	0.273954	0.530286	0.816842	0.790541	0.0263016	TRUE	-0.944462	2 vs 4	0.222262	1 vs 2	0.526316	0.304054	Btbd7:chr12:102780778-102781137:-1, Btbd7:chr12:102782364-102782611:-1, Btbd7:chr12:102783934-102784653:-1, Btbd7:chr12:102784317-102784558:-1, Btbd7:chr12:102784591-102785041:-1, Btbd7:chr12:102784931-102785222:-1	Btbd7	NA	NA	FALSE	FALSE	0.530286	NA	FALSE
702	1	NA	1	0.888889	0.111111	TRUE	Inf	1 vs 3	0.222222	1 vs 3	1	0.777778	C2cd4c:chr10:79610695-79611055:-1, C2cd4c:chr10:79610936-79611100:-1, C2cd4c:chr10:79611123-79611241:-1	C2cd4c	NA	NA	FALSE	FALSE	1	NA	FALSE
703	0.762491	NA	0.888889	0.777778	0.111111	TRUE	0.826679	2 vs 1	0.222222	2 vs 1	0.777778	0.555556	Tcaim:chr9:122835716-122836322:1, Tcaim:chr9:122835981-122836333:1	Tcaim	NA	NA	FALSE	FALSE	0.762491	NA	FALSE
704	0.0894171	0.46286	0.606897	0.495935	0.110962	TRUE	0.450546	2 vs 1	0.221923	2 vs 1	0.213793	-0.00813008	Bicd2:chr13:49384808-49385136:1, Bicd2:chr13:49386671-49387025:1	Bicd2	NA	NA	FALSE	FALSE	0.46286	NA	FALSE
705	0.0036673	0.00487203	0.768657	0.737252	0.0314052	FALSE	0.577057	1 vs 2	0.221775	1 vs 2	0.324627	0.102852	Actr2:chr11:20062259-20062659:-1, Actr2:chr11:20062460-20063033:-1, Actr2:chr11:20063266-20063859:-1, Actr2:chr11:20064665-20064939:-1	Actr2	0.0156817	0.0213383	TRUE	TRUE	0.00487203	0.0234819	TRUE
706	0.388513	NA	0.810811	0.7	0.110811	TRUE	0.607989	2 vs 1	0.221622	2 vs 1	0.621622	0.4	Syndig1:chr2:150003814-150004382:1, Syndig1:chr2:150004005-150004327:1	Syndig1	NA	NA	FALSE	FALSE	0.388513	NA	FALSE
707	0.0539967	NA	0.553571	0.6	-0.0464286	TRUE	-2.82138	4 vs 5	0.221429	3 vs 4	0.321429	0.1	Pik3c2a:chr7:116337248-116337620:-1, Pik3c2a:chr7:116337474-116337645:-1, Pik3c2a:chr7:116337495-116338005:-1, Pik3c2a:chr7:116338612-116339112:-1, Pik3c2a:chr7:116338904-116339445:-1	Pik3c2a	NA	NA	FALSE	FALSE	0.0539967	NA	FALSE
708	0.158344	NA	0.863388	0.753623	0.109765	TRUE	Inf	1 vs 3	0.220955	1 vs 4	0.655738	0.434783	Cpd:chr11:76778383-76778782:-1, Cpd:chr11:76779364-76779678:-1, Cpd:chr11:76779299-76779955:-1, Cpd:chr11:76781989-76782317:-1	Cpd	NA	NA	FALSE	FALSE	0.158344	NA	FALSE
709	0.0354415	0.0254134	0.5	0.374603	0.125397	TRUE	1.64866	1 vs 3	0.220952	1 vs 4	-0.16	-0.380952	Gm14288:chr2:175784511-175785286:-1, Gm14288:chr2:175785492-175785810:-1, Gm14288:chr2:175791205-175792024:-1, Gm14288:chr2:175791457-175791951:-1	Gm14288	NA	NA	FALSE	FALSE	0.0354415	NA	FALSE
710	2.05554e-17	7.53154e-10	0.125843	0.0154015	0.110441	FALSE	2.21954	1 vs 2	0.220882	1 vs 2	-0.748315	-0.969197	Fbxw2:chr2:34801671-34801966:-1, Fbxw2:chr2:34805302-34805725:-1	Fbxw2	5.49588e-16	1.26676e-08	TRUE	TRUE	7.53154e-10	1.33777e-08	TRUE
711	0.183075	0.232871	0.416667	0.405512	0.0111549	TRUE	0.76074	3 vs 2	0.22066	3 vs 2	0.0238095	-0.19685	Tnik:chr3:28669991-28670596:1, Tnik:chr3:28670263-28670599:1, Tnik:chr3:28675294-28675858:1	Tnik	NA	NA	FALSE	FALSE	0.232871	NA	FALSE
712	1.66146e-05	0.000442767	0.25495	0.144737	0.110214	FALSE	0.704111	1 vs 2	0.220427	1 vs 2	-0.490099	-0.710526	Snx12:chrX:101097775-101098143:-1, Snx12:chrX:101211927-101212324:-1	Snx12	0.000127112	0.00260006	TRUE	TRUE	0.000442767	0.00280773	TRUE
713	1.65975e-07	1.21665e-06	0.487111	0.413968	0.0731429	FALSE	1.51984	2 vs 4	0.22019	2 vs 4	-0.216	-0.43619	Cnot6:chr11:49671440-49671905:-1, Cnot6:chr11:49672502-49672875:-1, Cnot6:chr11:49673457-49673868:-1, Cnot6:chr11:49674721-49675050:-1	Cnot6	1.73489e-06	1.22781e-05	TRUE	TRUE	1.21665e-06	1.30392e-05	TRUE
714	0.104388	0.126444	0.697674	0.579802	0.117872	TRUE	2.99573	4 vs 2	0.219945	7 vs 2	0.186047	-0.0338983	Plekha1:chr7:130909327-130909816:1, Plekha1:chr7:130909520-130909805:1, Plekha1:chr7:130911080-130911514:1, Plekha1:chr7:130912597-130912967:1, Plekha1:chr7:130913036-130913272:1, Plekha1:chr7:130912851-130913391:1, Plekha1:chr7:130913173-130913502:1	Plekha1	NA	NA	FALSE	FALSE	0.126444	NA	FALSE
715	0.0743518	0.00956433	0.748148	0.643766	0.104382	TRUE	1.23676	3 vs 4	0.219508	2 vs 4	0.311111	0.0916031	Med14:chrX:12675364-12675698:-1, Med14:chrX:12675501-12675916:-1, Med14:chrX:12675831-12676015:-1, Med14:chrX:12679667-12680112:-1	Med14	NA	NA	FALSE	FALSE	0.0743518	NA	FALSE
716	0.0110375	0.0162798	0.863636	0.818436	0.0452006	TRUE	2.21557	2 vs 1	0.219502	2 vs 1	0.163636	-0.0558659	Fam117b:chr1:59981849-59982410:1, Fam117b:chr1:59984634-59985348:1, Fam117b:chr1:59985020-59985343:1	Fam117b	NA	NA	FALSE	FALSE	0.0162798	NA	FALSE
717	0.0310338	0.0651963	0.705882	0.653262	0.0526205	FALSE	0.840102	2 vs 3	0.218972	1 vs 3	0.323529	0.104558	Dyrk2:chr10:118855571-118855958:-1, Dyrk2:chr10:118855844-118856541:-1, Dyrk2:chr10:118857917-118858296:-1, Dyrk2:chr10:118859321-118859711:-1	Dyrk2	0.0911283	0.16745	FALSE	FALSE	0.0651963	0.189039	FALSE
718	0.10913	0.131012	0.534884	0.566748	-0.0318639	TRUE	1.02928	2 vs 1	0.218898	2 vs 1	0.267442	0.0485437	Ube3c:chr5:29632137-29632458:1, Ube3c:chr5:29674936-29675355:1, Ube3c:chr5:29675481-29675824:1, Ube3c:chr5:29675289-29676254:1, Ube3c:chr5:29675728-29676076:1	Ube3c	NA	NA	FALSE	FALSE	0.131012	NA	FALSE
719	0.27301	NA	0.471605	0.434711	0.0368942	TRUE	0.916291	5 vs 3	0.218753	5 vs 3	0.0617284	-0.157025	Kdm5a:chr6:120439908-120440309:1, Kdm5a:chr6:120441349-120441793:1, Kdm5a:chr6:120441948-120442215:1, Kdm5a:chr6:120441668-120442484:1, Kdm5a:chr6:120442494-120443101:1, Kdm5a:chr6:120444197-120444549:1	Kdm5a	NA	NA	FALSE	FALSE	0.27301	NA	FALSE
720	0.242959	0.184752	0.405063	0.305556	0.0995077	TRUE	Inf	3 vs 1	0.218706	3 vs 2	-0.392405	-0.611111	Klf5:chr14:99303403-99303508:1, Klf5:chr14:99313078-99313408:1, Klf5:chr14:99314718-99315040:1	Klf5	NA	NA	FALSE	FALSE	0.242959	NA	FALSE
721	0.027675	0.452294	0.435052	0.389796	0.0452556	TRUE	Inf	3 vs 1	0.218441	4 vs 1	-0.0927835	-0.311224	Fam160b1:chr19:57386552-57386952:1, Fam160b1:chr19:57387805-57388048:1, Fam160b1:chr19:57388668-57388814:1, Fam160b1:chr19:57388697-57389564:1, Fam160b1:chr19:57389125-57389409:1, Fam160b1:chr19:57389231-57389594:1	Fam160b1	NA	NA	FALSE	FALSE	0.452294	NA	FALSE
722	0.0563507	0.177837	0.255319	0.146138	0.109181	TRUE	0.789434	3 vs 1	0.218363	3 vs 1	-0.489362	-0.707724	Bmerb1:chr16:14100582-14101052:1, Bmerb1:chr16:14100461-14101535:1, Bmerb1:chr16:14100972-14101257:1	Bmerb1	NA	NA	FALSE	FALSE	0.177837	NA	FALSE
723	0.124954	NA	0.659864	0.614035	0.0458289	TRUE	1.63064	3 vs 4	0.218199	3 vs 4	0.376093	0.157895	Sox6:chr7:115470872-115471221:-1, Sox6:chr7:115473314-115473615:-1, Sox6:chr7:115474452-115474825:-1, Sox6:chr7:115476657-115477044:-1	Sox6	NA	NA	FALSE	FALSE	0.124954	NA	FALSE
724	0.491325	NA	0.909091	0.8	0.109091	TRUE	0.916291	2 vs 1	0.218182	2 vs 1	0.818182	0.6	Piga:chrX:164433252-164433804:1, Piga:chrX:164433519-164433904:1	Piga	NA	NA	FALSE	FALSE	0.491325	NA	FALSE
725	0.928932	NA	0.909091	0.8	0.109091	TRUE	0.916291	1 vs 2	0.218182	1 vs 2	0.818182	0.6	Zscan26:chr13:21442152-21442567:-1, Zscan26:chr13:21442371-21442697:-1	Zscan26	NA	NA	FALSE	FALSE	0.928932	NA	FALSE
726	0.412206	NA	0.857143	0.748252	0.108891	TRUE	0.70245	1 vs 2	0.217782	1 vs 2	0.714286	0.496503	Zfp786:chr6:47819278-47819595:-1, Zfp786:chr6:47819078-47820049:-1	Zfp786	NA	NA	FALSE	FALSE	0.412206	NA	FALSE
727	0.0119405	0.0206831	0.4375	0.384783	0.0527174	TRUE	-2.40267	5 vs 4	0.21762	4 vs 1	0.0263158	-0.191304	Arid1b:chr17:5342745-5343339:1, Arid1b:chr17:5343633-5344134:1, Arid1b:chr17:5343942-5344411:1, Arid1b:chr17:5344193-5344554:1, Arid1b:chr17:5345503-5345867:1	Arid1b	NA	NA	FALSE	FALSE	0.0206831	NA	FALSE
728	0.0692999	0.189615	0.59633	0.487544	0.108786	TRUE	0.44003	2 vs 1	0.217572	2 vs 1	0.192661	-0.024911	Tmem42:chr9:123022977-123023504:1, Tmem42:chr9:123023204-123023485:1	Tmem42	NA	NA	FALSE	FALSE	0.189615	NA	FALSE
729	0.236018	NA	0.719858	0.611111	0.108747	TRUE	1.97716	1 vs 3	0.217494	1 vs 3	0.439716	0.222222	Egln3:chr12:54178985-54179257:-1, Egln3:chr12:54179619-54179983:-1, Egln3:chr12:54180278-54180353:-1	Egln3	NA	NA	FALSE	FALSE	0.236018	NA	FALSE
730	0.0651887	0.0938225	0.244444	0.244931	-0.000486185	TRUE	#NAME?	4 vs 1	0.217408	3 vs 1	-0.0888889	-0.306297	Taok3:chr5:117273624-117273811:1, Taok3:chr5:117274060-117274373:1, Taok3:chr5:117273795-117274718:1, Taok3:chr5:117274505-117275117:1, Taok3:chr5:117274703-117275207:1	Taok3	NA	NA	FALSE	FALSE	0.0938225	NA	FALSE
731	1	NA	1	0.891304	0.108696	TRUE	Inf	2 vs 1	0.217391	2 vs 1	1	0.782609	Ntsr1:chr2:180544326-180544916:1, Ntsr1:chr2:180544611-180544980:1	Ntsr1	NA	NA	FALSE	FALSE	1	NA	FALSE
732	0.14358	0.165647	0.794872	0.686275	0.108597	TRUE	0.571786	2 vs 1	0.217195	2 vs 1	0.589744	0.372549	Cnp:chr11:100580559-100580967:1, Cnp:chr11:100581362-100581767:1	Cnp	NA	NA	FALSE	FALSE	0.165647	NA	FALSE
733	0.149015	NA	0.314815	0.274411	0.040404	TRUE	-1.1748	4 vs 3	0.217172	3 vs 1	-0.333333	-0.550505	Vldlr:chr19:27249296-27249599:1, Vldlr:chr19:27251585-27252188:1, Vldlr:chr19:27251816-27252013:1, Vldlr:chr19:27253871-27254221:1	Vldlr	NA	NA	FALSE	FALSE	0.149015	NA	FALSE
734	0.093303	0.103752	0.797753	0.689252	0.1085	FALSE	0.997416	3 vs 2	0.217001	3 vs 1	0.595506	0.378505	Ankrd27:chr7:35608637-35609107:1, Ankrd27:chr7:35609200-35609647:1, Ankrd27:chr7:35638829-35639241:1	Ankrd27	0.212166	0.237737	FALSE	FALSE	0.103752	0.266731	FALSE
735	0.305685	NA	0.84375	0.735294	0.108456	TRUE	0.664748	1 vs 2	0.216912	1 vs 2	0.6875	0.470588	Cox6b2:chr7:4751790-4752039:-1, Cox6b2:chr7:4752007-4752188:-1	Cox6b2	NA	NA	FALSE	FALSE	0.305685	NA	FALSE
736	0.00209296	0.00800781	0.347701	0.273118	0.0745829	TRUE	1.42473	1 vs 3	0.216518	1 vs 3	-0.318966	-0.535484	Lcmt2:chr2:121137203-121137641:-1, Lcmt2:chr2:121137899-121138288:-1, Lcmt2:chr2:121138428-121138962:-1, Lcmt2:chr2:121138548-121138811:-1	Lcmt2	NA	NA	FALSE	FALSE	0.00800781	NA	FALSE
737	0.448355	NA	0.263158	0.15493	0.108228	TRUE	0.66683	2 vs 1	0.216457	2 vs 1	-0.473684	-0.690141	Rnf41:chr10:128439997-128440362:1, Rnf41:chr10:128441116-128441464:1	Rnf41	NA	NA	FALSE	FALSE	0.448355	NA	FALSE
738	0.266007	0.371783	0.810458	0.723333	0.0871242	TRUE	1.25522	4 vs 3	0.216275	4 vs 3	0.686275	0.47	Cald1:chr6:34773465-34774149:1, Cald1:chr6:34773766-34774047:1, Cald1:chr6:34774853-34775492:1, Cald1:chr6:34775109-34775498:1	Cald1	NA	NA	FALSE	FALSE	0.371783	NA	FALSE
739	0.330864	NA	0.756757	0.648649	0.108108	TRUE	0.521875	2 vs 1	0.216216	2 vs 1	0.513514	0.297297	Naf1:chr8:66889281-66889590:1, Naf1:chr8:66890160-66890566:1	Naf1	NA	NA	FALSE	FALSE	0.330864	NA	FALSE
740	0.0111766	0.0500884	0.487963	0.470255	0.017708	TRUE	Inf	1 vs 5	0.216137	2 vs 6	0.148148	-0.0679887	Rnf214:chr9:45862331-45862634:-1, Rnf214:chr9:45862739-45863015:-1, Rnf214:chr9:45862874-45863138:-1, Rnf214:chr9:45863270-45863624:-1, Rnf214:chr9:45862940-45863405:-1, Rnf214:chr9:45863504-45863846:-1, Rnf214:chr9:45863529-45864119:-1, Rnf214:chr9:45864288-45864618:-1, Rnf214:chr9:45864716-45865075:-1	Rnf214	NA	NA	FALSE	FALSE	0.0500884	NA	FALSE
741	0.00217272	0.00409328	0.501253	0.396552	0.104701	TRUE	1.83873	2 vs 4	0.215582	2 vs 4	-0.353383	-0.568966	Kmt2c:chr5:25271808-25272106:-1, Kmt2c:chr5:25271629-25272410:-1, Kmt2c:chr5:25272239-25272460:-1, Kmt2c:chr5:25272398-25272827:-1	Kmt2c	NA	NA	FALSE	FALSE	0.00409328	NA	FALSE
742	0.422769	0.651157	0.448795	0.359155	0.0896403	TRUE	0.960789	4 vs 1	0.21534	4 vs 1	-0.0240964	-0.239437	Zfp882:chr8:71914641-71915114:1, Zfp882:chr8:71915513-71916282:1, Zfp882:chr8:71915907-71916288:1, Zfp882:chr8:71917722-71918170:1, Zfp882:chr8:71918501-71918849:1	Zfp882	NA	NA	FALSE	FALSE	0.651157	NA	FALSE
743	0.0250068	0.134415	0.4	0.29235	0.10765	FALSE	0.478534	1 vs 2	0.215301	1 vs 2	-0.2	-0.415301	Epn2:chr11:61517211-61517597:-1, Epn2:chr11:61518595-61518973:-1	Epn2	0.0767116	0.285738	FALSE	FALSE	0.134415	0.319263	FALSE
744	0.546519	NA	0.76	0.699029	0.0609709	TRUE	Inf	1 vs 3	0.214757	1 vs 2	0.04	-0.174757	Rps6ka5:chr12:100548424-100548784:-1, Rps6ka5:chr12:100549728-100550272:-1, Rps6ka5:chr12:100549803-100550542:-1	Rps6ka5	NA	NA	FALSE	FALSE	0.546519	NA	FALSE
745	0.25684	0.469234	0.816562	0.75	0.0665618	TRUE	0.592183	1 vs 2	0.214609	1 vs 2	0.530398	0.315789	Gas1:chr13:60174401-60174780:-1, Gas1:chr13:60174436-60175329:-1, Gas1:chr13:60175059-60175516:-1	Gas1	NA	NA	FALSE	FALSE	0.469234	NA	FALSE
746	0.015526	0.106386	0.517857	0.410557	0.1073	FALSE	0.433121	1 vs 2	0.2146	1 vs 2	0.0357143	-0.178886	Tent2:chr13:93146253-93146644:-1, Tent2:chr13:93147397-93147744:-1	Tent2	0.0525113	0.243311	FALSE	FALSE	0.106386	0.272399	FALSE
747	1	NA	0.5	0.392857	0.107143	TRUE	0.435318	2 vs 1	0.214286	2 vs 1	0	-0.214286	Plaat1:chr16:29228050-29228390:1, Plaat1:chr16:29230199-29230531:1	Plaat1	NA	NA	FALSE	FALSE	1	NA	FALSE
748	0.0119047	0.320316	0.423077	0.315942	0.107135	TRUE	0.701425	3 vs 1	0.21427	3 vs 1	-0.153846	-0.368116	Zfp282:chr6:47906662-47906955:1, Zfp282:chr6:47906461-47907072:1, Zfp282:chr6:47906755-47907709:1	Zfp282	NA	NA	FALSE	FALSE	0.320316	NA	FALSE
749	0.568927	NA	0.777778	0.720588	0.0571895	TRUE	1.32176	2 vs 3	0.214052	2 vs 3	0.111111	-0.102941	Sertm1:chr3:54897068-54897444:-1, Sertm1:chr3:54898041-54898385:-1, Sertm1:chr3:54898319-54898883:-1	Sertm1	NA	NA	FALSE	FALSE	0.568927	NA	FALSE
750	0.021076	0.0454576	0.623529	0.516539	0.10699	FALSE	0.461635	3 vs 1	0.21398	3 vs 1	0.247059	0.0330789	Lpcat1:chr13:73514764-73515129:1, Lpcat1:chr13:73515684-73516463:1, Lpcat1:chr13:73516032-73516456:1	Lpcat1	0.0672524	0.130473	FALSE	FALSE	0.0454576	0.145435	FALSE
751	0.000259352	0.00250685	0.515957	0.465372	0.0505858	FALSE	1.35946	1 vs 2	0.21388	1 vs 2	-0.585106	-0.798986	Chn1:chr2:73610697-73611020:-1, Chn1:chr2:73612300-73612705:-1, Chn1:chr2:73612835-73613237:-1	Chn1	0.00150745	0.0121432	TRUE	TRUE	0.00250685	0.0132379	TRUE
752	0.345964	0.478729	0.708455	0.636119	0.0723362	TRUE	Inf	3 vs 2	0.21382	6 vs 4	0.204082	-0.00973828	Ank3:chr10:70023829-70023928:1, Ank3:chr10:70023852-70024629:1, Ank3:chr10:70023975-70024584:1, Ank3:chr10:70024284-70024609:1, Ank3:chr10:70024524-70024926:1, Ank3:chr10:70024742-70025079:1, Ank3:chr10:70025021-70025401:1, Ank3:chr10:70026882-70027326:1	Ank3	NA	NA	FALSE	FALSE	0.478729	NA	FALSE
753	0.428321	NA	0.263158	0.15625	0.106908	TRUE	0.65678	1 vs 2	0.213816	1 vs 2	-0.473684	-0.6875	Garnl3:chr2:32986250-32986464:-1, Garnl3:chr2:32986268-32986777:-1	Garnl3	NA	NA	FALSE	FALSE	0.428321	NA	FALSE
754	0.453396	NA	0.884615	0.777778	0.106838	TRUE	0.784119	2 vs 1	0.213675	2 vs 1	0.769231	0.555556	AW554918:chr18:25466059-25466517:1, AW554918:chr18:25466979-25467321:1	AW554918	NA	NA	FALSE	FALSE	0.453396	NA	FALSE
755	0.00941583	0.0201209	0.869318	0.827731	0.0415871	TRUE	-2.541	2 vs 1	0.213617	3 vs 2	0.852273	0.638655	Jmjd1c:chr10:67255304-67256232:1, Jmjd1c:chr10:67255773-67256310:1, Jmjd1c:chr10:67255976-67256312:1	Jmjd1c	NA	NA	FALSE	FALSE	0.0201209	NA	FALSE
756	0.228228	0.261492	0.646429	0.573284	0.0731447	TRUE	Inf	2 vs 1	0.212987	8 vs 5	0.2	-0.012987	Chic1:chrX:103389173-103389332:1, Chic1:chrX:103389393-103389703:1, Chic1:chrX:103389733-103390049:1, Chic1:chrX:103389258-103390346:1, Chic1:chrX:103391181-103391731:1, Chic1:chrX:103391744-103392311:1, Chic1:chrX:103391939-103392370:1, Chic1:chrX:103395726-103396108:1	Chic1	NA	NA	FALSE	FALSE	0.261492	NA	FALSE
757	0.223324	0.613648	0.693548	0.587156	0.106392	TRUE	0.464541	1 vs 2	0.212785	1 vs 2	0.387097	0.174312	Gm43951:chr11:72154072-72154430:-1, Gm43951:chr11:72198382-72198674:-1	Gm43951	NA	NA	FALSE	FALSE	0.613648	NA	FALSE
758	0.271303	0.394308	0.468927	0.40824	0.0606869	TRUE	0.916291	4 vs 1	0.212436	3 vs 2	-0.186441	-0.398876	Atxn7l1:chr12:33250570-33251223:1, Atxn7l1:chr12:33250814-33251138:1, Atxn7l1:chr12:33328417-33328859:1, Atxn7l1:chr12:33376109-33376405:1	Atxn7l1	NA	NA	FALSE	FALSE	0.394308	NA	FALSE
759	1	NA	0.5	0.393939	0.106061	TRUE	0.430783	1 vs 2	0.212121	1 vs 2	0	-0.212121	Coro2a:chr4:46536972-46537221:-1, Coro2a:chr4:46536937-46537550:-1	Coro2a	NA	NA	FALSE	FALSE	1	NA	FALSE
760	0.805378	NA	0.875	0.769231	0.105769	TRUE	0.741937	2 vs 1	0.211538	2 vs 1	0.75	0.538462	Inf2:chr12:112614998-112615557:1, Inf2:chr12:112615253-112615557:1	Inf2	NA	NA	FALSE	FALSE	0.805378	NA	FALSE
761	0.0164035	0.363153	0.897321	0.791667	0.105655	TRUE	Inf	1 vs 2	0.21131	1 vs 3	0.794643	0.583333	Fgfr2:chr7:130162426-130162856:-1, Fgfr2:chr7:130163506-130163719:-1, Fgfr2:chr7:130163349-130163955:-1	Fgfr2	NA	NA	FALSE	FALSE	0.363153	NA	FALSE
762	0.747669	NA	0.440741	0.366667	0.0740741	TRUE	1.00823	2 vs 3	0.211111	2 vs 3	0.311111	0.1	Stk17b:chr1:53755506-53755964:-1, Stk17b:chr1:53756093-53756401:-1, Stk17b:chr1:53756051-53756606:-1, Stk17b:chr1:53757160-53757539:-1	Stk17b	NA	NA	FALSE	FALSE	0.747669	NA	FALSE
763	1	NA	0.305556	0.2	0.105556	TRUE	0.565314	2 vs 1	0.211111	2 vs 1	-0.388889	-0.6	Ticrr:chr7:79697769-79698148:1, Ticrr:chr7:79697964-79698148:1	Ticrr	NA	NA	FALSE	FALSE	1	NA	FALSE
764	0.000898707	0.00261684	0.700224	0.629167	0.071057	TRUE	1.79823	3 vs 1	0.211074	3 vs 1	0.161074	-0.05	Pbx2:chr17:34595812-34596181:1, Pbx2:chr17:34595999-34596745:1, Pbx2:chr17:34596366-34596677:1, Pbx2:chr17:34597058-34597404:1	Pbx2	NA	NA	FALSE	FALSE	0.00261684	NA	FALSE
765	0.72641	NA	0.409091	0.303738	0.105353	TRUE	0.532805	1 vs 3	0.210705	1 vs 3	-0.181818	-0.392523	Cdh8:chr8:99028906-99029335:-1, Cdh8:chr8:99029670-99029982:-1, Cdh8:chr8:99030397-99030738:-1	Cdh8	NA	NA	FALSE	FALSE	0.72641	NA	FALSE
766	0.0808869	0.158934	0.731343	0.785861	-0.0545174	TRUE	-2.83321	6 vs 1	0.210668	9 vs 8	0.358209	0.147541	Zfp382:chr7:30134288-30134652:1, Zfp382:chr7:30134460-30134800:1, Zfp382:chr7:30134597-30134937:1, Zfp382:chr7:30134589-30135060:1, Zfp382:chr7:30134708-30135125:1, Zfp382:chr7:30134884-30135188:1, Zfp382:chr7:30139450-30140122:1, Zfp382:chr7:30139767-30140192:1, Zfp382:chr7:30140299-30140784:1	Zfp382	NA	NA	FALSE	FALSE	0.158934	NA	FALSE
767	1.72177e-05	0.000190475	0.810484	0.723684	0.0867997	FALSE	1.03909	2 vs 3	0.210314	1 vs 3	0.552419	0.342105	Clic4:chr4:135213936-135214335:-1, Clic4:chr4:135214236-135214895:-1, Clic4:chr4:135215384-135215821:-1, Clic4:chr4:135216482-135216971:-1	Clic4	0.00013133	0.00125703	TRUE	TRUE	0.000190475	0.00134765	TRUE
768	0.489209	0.402227	0.9	0.794931	0.105069	TRUE	Inf	2 vs 1	0.210138	3 vs 1	0.8	0.589862	Sema3c:chr5:17728228-17728741:1, Sema3c:chr5:17729031-17729420:1, Sema3c:chr5:17729934-17730263:1	Sema3c	NA	NA	FALSE	FALSE	0.489209	NA	FALSE
769	0.050834	0.0179638	0.555556	0.461957	0.093599	TRUE	Inf	1 vs 2	0.209952	1 vs 4	0.0577778	-0.152174	Hjurp:chr1:88258856-88259154:-1, Hjurp:chr1:88258878-88259612:-1, Hjurp:chr1:88263093-88263428:-1, Hjurp:chr1:88263712-88264027:-1, Hjurp:chr1:88264498-88264805:-1	Hjurp	NA	NA	FALSE	FALSE	0.050834	NA	FALSE
770	0.00297011	0.00380666	0.573864	0.490922	0.0829418	FALSE	1.62268	1 vs 5	0.209815	3 vs 5	0.352273	0.142458	Ttll12:chr15:83575075-83575407:-1, Ttll12:chr15:83575616-83575973:-1, Ttll12:chr15:83575783-83576159:-1, Ttll12:chr15:83575481-83576531:-1, Ttll12:chr15:83576730-83577034:-1	Ttll12	0.013143	0.0173957	TRUE	TRUE	0.00380666	0.0190708	TRUE
771	0.00474649	0.0845493	0.413978	0.361511	0.0524677	TRUE	2.63906	2 vs 4	0.209793	2 vs 5	-0.322581	-0.532374	Ddi2:chr4:141677549-141677914:-1, Ddi2:chr4:141678979-141679443:-1, Ddi2:chr4:141681441-141681826:-1, Ddi2:chr4:141683182-141683507:-1, Ddi2:chr4:141683529-141683933:-1	Ddi2	NA	NA	FALSE	FALSE	0.0845493	NA	FALSE
772	0.14666	NA	1	0.895171	0.104829	TRUE	Inf	1 vs 2	0.209658	1 vs 2	1	0.790342	Cd200:chr16:45382110-45382504:-1, Cd200:chr16:45383006-45383317:-1	Cd200	NA	NA	FALSE	FALSE	0.14666	NA	FALSE
773	0.265155	NA	0.846154	0.741379	0.104775	TRUE	0.651598	1 vs 2	0.209549	1 vs 2	0.692308	0.482759	Flvcr1:chr1:191005792-191006228:-1, Flvcr1:chr1:191024854-191025278:-1	Flvcr1	NA	NA	FALSE	FALSE	0.265155	NA	FALSE
774	0.150307	0.446955	0.5	0.403614	0.0963855	TRUE	0.82736	1 vs 2	0.209497	1 vs 2	0.305882	0.0963855	Mrs2:chr13:24987483-24987856:-1, Mrs2:chr13:24987989-24988402:-1, Mrs2:chr13:24992901-24993314:-1	Mrs2	NA	NA	FALSE	FALSE	0.446955	NA	FALSE
775	0.0586241	NA	0.915663	0.811024	0.104639	TRUE	0.928148	2 vs 1	0.209278	2 vs 1	0.831325	0.622047	Zfp180:chr7:24106773-24107274:1, Zfp180:chr7:24107283-24107713:1	Zfp180	NA	NA	FALSE	FALSE	0.0586241	NA	FALSE
776	0.363887	NA	0.766551	0.714286	0.0522648	TRUE	1.62746	2 vs 3	0.209059	2 vs 3	0.351916	0.142857	Tcf7l1:chr6:72626369-72626702:-1, Tcf7l1:chr6:72627181-72627459:-1, Tcf7l1:chr6:72627119-72627745:-1	Tcf7l1	NA	NA	FALSE	FALSE	0.363887	NA	FALSE
777	0.677673	NA	0.222222	0.186441	0.0357815	TRUE	#NAME?	4 vs 1	0.20904	3 vs 1	-0.333333	-0.542373	Cntnap4:chr8:112882027-112882486:1, Cntnap4:chr8:112881947-112882021:1, Cntnap4:chr8:112882223-112882592:1, Cntnap4:chr8:112882454-112882672:1	Cntnap4	NA	NA	FALSE	FALSE	0.677673	NA	FALSE
778	0.429737	NA	0.810345	0.705882	0.104462	TRUE	Inf	2 vs 1	0.208925	3 vs 1	0.62069	0.411765	Wasf2:chr4:133197974-133198342:1, Wasf2:chr4:133198965-133199769:1, Wasf2:chr4:133199335-133199794:1	Wasf2	NA	NA	FALSE	FALSE	0.429737	NA	FALSE
779	0.00321484	0.018683	0.592702	0.529052	0.0636502	TRUE	-1.62113	4 vs 3	0.208892	3 vs 1	0.153846	-0.0550459	Prkcb:chr7:122628219-122628673:1, Prkcb:chr7:122628420-122628641:1, Prkcb:chr7:122628749-122628977:1, Prkcb:chr7:122630164-122630453:1, Prkcb:chr7:122630774-122631117:1, Prkcb:chr7:122633115-122633321:1, Prkcb:chr7:122633984-122634402:1	Prkcb	NA	NA	FALSE	FALSE	0.018683	NA	FALSE
780	0.0269659	0.0933699	0.711779	0.653465	0.0583141	TRUE	1.56952	2 vs 7	0.208864	2 vs 5	0.142857	-0.0660066	Gm49359:chr13:62452614-62452948:-1, Gm49359:chr13:62453030-62453287:-1, Gm49359:chr13:62452535-62453191:-1, Gm49359:chr13:62453121-62453960:-1, Gm49359:chr13:62453494-62453772:-1, Gm49359:chr13:62453679-62454213:-1, Gm49359:chr13:62454196-62454719:-1	Gm49359	NA	NA	FALSE	FALSE	0.0933699	NA	FALSE
781	0.0269659	0.0933699	0.711779	0.653465	0.0583141	TRUE	1.56952	2 vs 7	0.208864	2 vs 5	0.142857	-0.0660066	Zfp935:chr13:62452614-62452948:-1, Zfp935:chr13:62453030-62453287:-1, Zfp935:chr13:62452535-62453191:-1, Zfp935:chr13:62453121-62453960:-1, Zfp935:chr13:62453494-62453772:-1, Zfp935:chr13:62453679-62454213:-1, Zfp935:chr13:62454196-62454719:-1	Zfp935	NA	NA	FALSE	FALSE	0.0933699	NA	FALSE
782	0.00989388	0.0154744	0.444444	0.355691	0.0887534	TRUE	1.23214	2 vs 3	0.207577	1 vs 3	-0.0851064	-0.292683	Abcc5:chr16:20331282-20331635:-1, Abcc5:chr16:20332208-20332503:-1, Abcc5:chr16:20400736-20401116:-1, Abcc5:chr16:20402126-20402489:-1	Abcc5	NA	NA	FALSE	FALSE	0.0154744	NA	FALSE
783	0.0826766	0.0838972	0.414894	0.311111	0.103783	TRUE	1.38629	3 vs 2	0.207565	3 vs 1	-0.170213	-0.377778	Ap4m1:chr5:138178276-138178729:1, Ap4m1:chr5:138179005-138179581:1, Ap4m1:chr5:138180033-138180460:1	Ap4m1	NA	NA	FALSE	FALSE	0.0838972	NA	FALSE
784	0.50721	NA	0.875	0.771429	0.103571	TRUE	0.729515	2 vs 1	0.207143	2 vs 1	0.75	0.542857	Ercc6l2:chr13:63853476-63853810:1, Ercc6l2:chr13:63899921-63900291:1	Ercc6l2	NA	NA	FALSE	FALSE	0.50721	NA	FALSE
785	0.445299	0.585818	0.793103	0.689655	0.103448	TRUE	0.545227	1 vs 2	0.206897	1 vs 2	0.586207	0.37931	Tiam1:chr16:89787104-89787485:-1, Tiam1:chr16:89788442-89788752:-1	Tiam1	NA	NA	FALSE	FALSE	0.585818	NA	FALSE
786	0.158331	0.155268	0.723684	0.620253	0.103431	TRUE	0.472188	2 vs 1	0.206862	2 vs 1	0.447368	0.240506	Dvl3:chr16:20531313-20531695:1, Dvl3:chr16:20533603-20534066:1	Dvl3	NA	NA	FALSE	FALSE	0.158331	NA	FALSE
787	0.121475	0.275561	0.490196	0.510363	-0.0201666	TRUE	1.08786	1 vs 2	0.206594	1 vs 2	-0.215686	-0.42228	Slc49a4:chr16:35694044-35694499:-1, Slc49a4:chr16:35696861-35697351:-1, Slc49a4:chr16:35697335-35697679:-1, Slc49a4:chr16:35697441-35697852:-1	Slc49a4	NA	NA	FALSE	FALSE	0.275561	NA	FALSE
788	6.3914e-17	1.01936e-13	0.528295	0.425013	0.103283	FALSE	0.415531	2 vs 1	0.206565	2 vs 1	0.0565903	-0.149975	Gm20521:chr14:54897808-54898196:1, Gm20521:chr14:54898531-54898927:1	Gm20521	1.63981e-15	2.16569e-12	TRUE	TRUE	1.01936e-13	2.31175e-12	TRUE
789	0.347315	NA	0.807692	0.704545	0.103147	TRUE	0.566047	1 vs 2	0.206294	1 vs 2	0.615385	0.409091	Tmem231:chr8:111911991-111912347:-1, Tmem231:chr8:111912280-111913068:-1	Tmem231	NA	NA	FALSE	FALSE	0.347315	NA	FALSE
790	0.00095957	0.00317575	0.326403	0.22335	0.103053	FALSE	0.521751	1 vs 2	0.206106	1 vs 2	-0.347193	-0.553299	2310011J03Rik:chr10:80318221-80318625:-1, 2310011J03Rik:chr10:80318663-80319081:-1	2310011J03Rik	0.00480731	0.0149353	TRUE	TRUE	0.00317575	0.0162958	TRUE
791	0.399185	NA	0.23913	0.136364	0.102767	TRUE	0.688374	1 vs 2	0.205534	1 vs 2	-0.521739	-0.727273	Acadl:chr1:66830813-66831247:-1, Acadl:chr1:66831336-66831573:-1	Acadl	NA	NA	FALSE	FALSE	0.399185	NA	FALSE
792	0.361429	0.348475	0.56621	0.479452	0.086758	TRUE	0.76214	1 vs 2	0.205479	1 vs 3	0.136986	-0.0684932	Nup98:chr7:102119354-102119758:-1, Nup98:chr7:102133539-102133863:-1, Nup98:chr7:102134193-102134565:-1, Nup98:chr7:102145162-102145739:-1	Nup98	NA	NA	FALSE	FALSE	0.361429	NA	FALSE
793	0.236756	0.398905	0.802632	0.7	0.102632	TRUE	1.38629	2 vs 1	0.205263	3 vs 1	0.605263	0.4	Traf3ip1:chr1:91527638-91527987:1, Traf3ip1:chr1:91528810-91529370:1, Traf3ip1:chr1:91528971-91529305:1	Traf3ip1	NA	NA	FALSE	FALSE	0.398905	NA	FALSE
794	0.54789	NA	0.948718	0.846154	0.102564	TRUE	1.21302	2 vs 1	0.205128	2 vs 1	0.897436	0.692308	Gm49333:chr16:20645521-20645725:1, Gm49333:chr16:20645586-20645920:1	Gm49333	NA	NA	FALSE	FALSE	0.54789	NA	FALSE
795	0.0375596	NA	0.990566	0.88806	0.102506	TRUE	Inf	1 vs 3	0.205013	1 vs 3	0.981132	0.776119	Clcn6:chr4:148004199-148004643:-1, Clcn6:chr4:148006072-148006495:-1, Clcn6:chr4:148006290-148006644:-1	Clcn6	NA	NA	FALSE	FALSE	0.0375596	NA	FALSE
796	0.260618	0.718811	0.868421	0.766129	0.102292	TRUE	1.16179	1 vs 2	0.204584	1 vs 3	0.736842	0.532258	Rlf:chr4:121145860-121146196:-1, Rlf:chr4:121145991-121146516:-1, Rlf:chr4:121146129-121146381:-1	Rlf	NA	NA	FALSE	FALSE	0.718811	NA	FALSE
797	0.586504	NA	0.333333	0.306452	0.0268817	TRUE	#NAME?	3 vs 1	0.204301	2 vs 1	0.333333	0.129032	Ggcx:chr6:72429939-72430709:1, Ggcx:chr6:72430369-72430723:1, Ggcx:chr6:72430630-72430729:1	Ggcx	NA	NA	FALSE	FALSE	0.586504	NA	FALSE
798	0.682555	NA	0.6875	0.585366	0.102134	TRUE	0.443617	1 vs 2	0.204268	1 vs 2	0.375	0.170732	Dnajc28:chr16:91614236-91614576:-1, Dnajc28:chr16:91615714-91616063:-1	Dnajc28	NA	NA	FALSE	FALSE	0.682555	NA	FALSE
799	0.0192924	0.0665957	0.395122	0.293413	0.101709	FALSE	0.453032	2 vs 1	0.203418	2 vs 1	-0.209756	-0.413174	Mtpap:chr18:4396328-4396837:1, Mtpap:chr18:4396934-4397349:1	Mtpap	0.0623445	0.170682	FALSE	FALSE	0.0665957	0.192657	FALSE
800	0.550089	NA	0.8	0.698413	0.101587	TRUE	0.546544	1 vs 2	0.203175	1 vs 2	0.6	0.396825	H4c14:chr3:96261720-96262044:-1, H4c14:chr3:96261705-96262312:-1	H4c14	NA	NA	FALSE	FALSE	0.550089	NA	FALSE
801	0.0599665	0.206984	0.434211	0.329235	0.104976	TRUE	1.56862	4 vs 1	0.202977	5 vs 1	-0.0921053	-0.295082	Sesn3:chr9:14325640-14326199:1, Sesn3:chr9:14325812-14326113:1, Sesn3:chr9:14328353-14328753:1, Sesn3:chr9:14332312-14333122:1, Sesn3:chr9:14332746-14333104:1	Sesn3	NA	NA	FALSE	FALSE	0.206984	NA	FALSE
802	0.00194051	0.013286	0.205479	0.104	0.101479	FALSE	0.801157	1 vs 2	0.202959	1 vs 2	-0.589041	-0.792	Nectin2:chr7:19716642-19717021:-1, Nectin2:chr7:19724128-19724514:-1	Nectin2	0.00906045	0.0489783	TRUE	TRUE	0.013286	0.0546944	FALSE
803	0.388813	NA	0.75	0.648649	0.101351	TRUE	0.485508	1 vs 2	0.202703	1 vs 2	0.5	0.297297	Akap7:chr10:25169090-25169433:-1, Akap7:chr10:25170096-25170394:-1	Akap7	NA	NA	FALSE	FALSE	0.388813	NA	FALSE
804	0.674478	NA	0.54902	0.481481	0.0675381	TRUE	Inf	3 vs 2	0.202614	4 vs 2	-0.352941	-0.555556	Matn2:chr15:34428988-34429285:1, Matn2:chr15:34430995-34431265:1, Matn2:chr15:34435651-34436169:1, Matn2:chr15:34435941-34436206:1	Matn2	NA	NA	FALSE	FALSE	0.674478	NA	FALSE
805	1.17306e-07	7.70862e-07	0.515759	0.43412	0.0816392	FALSE	1.16898	2 vs 4	0.202411	1 vs 3	-0.401146	-0.603557	Rbfox2:chr15:77078986-77079338:-1, Rbfox2:chr15:77082321-77082684:-1, Rbfox2:chr15:77083820-77084161:-1, Rbfox2:chr15:77084101-77084244:-1	Rbfox2	1.26253e-06	8.04753e-06	TRUE	TRUE	7.70862e-07	8.58767e-06	TRUE
806	0.000614164	0.00516748	0.494318	0.43109	0.0632284	TRUE	1.16298	3 vs 2	0.202214	3 vs 2	-0.477273	-0.679487	Fam177a:chr12:55138678-55139084:1, Fam177a:chr12:55139194-55139627:1, Fam177a:chr12:55141671-55142104:1	Fam177a	NA	NA	FALSE	FALSE	0.00516748	NA	FALSE
807	1	NA	0.545455	0.444444	0.10101	TRUE	0.405465	2 vs 1	0.20202	2 vs 1	0.0909091	-0.111111	Mboat1:chr13:30246233-30246542:1, Mboat1:chr13:30246347-30246700:1	Mboat1	NA	NA	FALSE	FALSE	1	NA	FALSE
808	0.000393725	0.000355457	0.569307	0.49	0.0793069	TRUE	1.38216	2 vs 4	0.201881	2 vs 4	0.311881	0.11	Sp3:chr2:72936414-72936829:-1, Sp3:chr2:72936653-72936952:-1, Sp3:chr2:72936779-72937196:-1, Sp3:chr2:72937128-72937644:-1	Sp3	NA	NA	FALSE	FALSE	0.000393725	NA	FALSE
809	0.711297	NA	0.493333	0.442105	0.0512281	TRUE	#NAME?	5 vs 1	0.201754	6 vs 3	0.166667	-0.0350877	Lpp:chr16:24979124-24979363:1, Lpp:chr16:24980680-24981029:1, Lpp:chr16:24983659-24984042:1, Lpp:chr16:24989265-24989466:1, Lpp:chr16:24992013-24992214:1, Lpp:chr16:24992153-24992578:1	Lpp	NA	NA	FALSE	FALSE	0.711297	NA	FALSE
810	8.62834e-05	0.00154336	0.289541	0.258343	0.031198	FALSE	-1.19749	1 vs 4	0.201652	4 vs 5	-0.306122	-0.507774	Klf7:chr1:64029447-64029799:-1, Klf7:chr1:64032857-64033211:-1, Klf7:chr1:64033479-64033824:-1, Klf7:chr1:64034702-64035035:-1, Klf7:chr1:64035719-64035781:-1	Klf7	0.000561948	0.00793635	TRUE	TRUE	0.00154336	0.00855925	TRUE
811	1	NA	1	0.899254	0.100746	TRUE	Inf	1 vs 2	0.201493	1 vs 2	1	0.798507	Nefm:chr14:68119524-68119876:-1, Nefm:chr14:68119501-68120332:-1	Nefm	NA	NA	FALSE	FALSE	1	NA	FALSE
812	0.251122	NA	0.833333	0.732673	0.10066	TRUE	0.60121	2 vs 1	0.20132	2 vs 1	0.666667	0.465347	Alg10b:chr15:90230089-90230556:1, Alg10b:chr15:90233045-90233481:1	Alg10b	NA	NA	FALSE	FALSE	0.251122	NA	FALSE
813	0.692346	NA	0.560811	0.583333	-0.0225225	TRUE	-1.09861	5 vs 1	0.201201	4 vs 3	-0.243243	-0.444444	Dcbld2:chr16:58468456-58468648:1, Dcbld2:chr16:58468617-58468890:1, Dcbld2:chr16:58468689-58469068:1, Dcbld2:chr16:58468857-58469115:1, Dcbld2:chr16:58469334-58469745:1	Dcbld2	NA	NA	FALSE	FALSE	0.692346	NA	FALSE
814	0.352951	NA	0.880952	0.780488	0.100465	TRUE	0.732969	1 vs 2	0.200929	1 vs 2	0.761905	0.560976	Pigw:chr11:84876284-84876700:-1, Pigw:chr11:84876708-84877340:-1	Pigw	NA	NA	FALSE	FALSE	0.352951	NA	FALSE
815	0.281132	NA	0.962963	0.8625	0.100463	TRUE	1.42189	1 vs 2	0.200926	1 vs 2	0.925926	0.725	Ccdc186:chr19:56787481-56787804:-1, Ccdc186:chr19:56789214-56789661:-1	Ccdc186	NA	NA	FALSE	FALSE	0.281132	NA	FALSE
816	0.474368	NA	0.839286	0.73913	0.100155	TRUE	0.611469	1 vs 2	0.200311	1 vs 2	0.678571	0.478261	Ppwd1:chr13:104205113-104205415:-1, Ppwd1:chr13:104205097-104205684:-1	Ppwd1	NA	NA	FALSE	FALSE	0.474368	NA	FALSE
817	0.948985	NA	0.75	0.65	0.1	TRUE	0.479573	2 vs 1	0.2	2 vs 1	0.5	0.3	Cavin4:chr4:48673107-48673531:1, Cavin4:chr4:48675588-48675974:1	Cavin4	NA	NA	FALSE	FALSE	0.948985	NA	FALSE
818	0.975227	NA	1	0.9	0.1	TRUE	Inf	1 vs 2	0.2	1 vs 2	1	0.8	Dennd5b:chr6:148988069-148988425:-1, Dennd5b:chr6:148988429-148988612:-1	Dennd5b	NA	NA	FALSE	FALSE	0.975227	NA	FALSE
819	0.051051	0.0318122	0.898551	0.797101	0.101449	FALSE	1.91621	7 vs 2	0.2	7 vs 2	0.808696	0.608696	Epm2aip1:chr9:111273756-111273987:1, Epm2aip1:chr9:111273775-111274144:1, Epm2aip1:chr9:111273580-111274441:1, Epm2aip1:chr9:111275189-111275675:1, Epm2aip1:chr9:111275389-111275739:1, Epm2aip1:chr9:111275002-111275989:1, Epm2aip1:chr9:111278714-111279114:1	Epm2aip1	0.135489	0.0999342	FALSE	FALSE	0.051051	0.157327	FALSE
820	1	NA	1	0.9	0.1	TRUE	Inf	2 vs 1	0.2	2 vs 1	1	0.8	Nfkbid:chr7:30428207-30428660:1, Nfkbid:chr7:30428439-30428746:1	Nfkbid	NA	NA	FALSE	FALSE	1	NA	FALSE
821	1	NA	0.6	0.5	0.1	TRUE	0.405465	1 vs 2	0.2	1 vs 2	0.2	0	Prkg1:chr19:30564487-30564810:-1, Prkg1:chr19:30568556-30568865:-1	Prkg1	NA	NA	FALSE	FALSE	1	NA	FALSE
822	0.833411	NA	0.6	0.555556	0.0444444	TRUE	0.800778	1 vs 3	0.2	1 vs 3	0.333333	0.133333	Zfyve16:chr13:92487049-92487758:-1, Zfyve16:chr13:92487713-92487957:-1, Zfyve16:chr13:92487740-92488166:-1, Zfyve16:chr13:92487768-92488451:-1	Zfyve16	NA	NA	FALSE	FALSE	0.833411	NA	FALSE
823	0.438588	0.616361	0.636364	0.536585	0.0997783	TRUE	0.413012	1 vs 2	0.199557	1 vs 2	0.272727	0.0731707	Lamc1:chr1:153218898-153219161:-1, Lamc1:chr1:153218855-153219394:-1	Lamc1	NA	NA	FALSE	FALSE	0.616361	NA	FALSE
824	0.000541171	0.00214668	0.474255	0.453883	0.0203712	FALSE	0.680716	2 vs 3	0.19947	2 vs 3	0.701897	0.502427	Ddx19a:chr8:110974508-110974918:-1, Ddx19a:chr8:110974948-110975360:-1, Ddx19a:chr8:110975828-110976132:-1	Ddx19a	0.00288171	0.0106761	FALSE	FALSE	0.00214668	0.0116012	FALSE
825	7.01889e-10	9.70268e-10	0.904762	0.805106	0.0996555	FALSE	0.832771	2 vs 1	0.199311	2 vs 1	0.809524	0.610213	Cbx3:chr6:51482404-51482660:1, Cbx3:chr6:51483297-51483716:1	Cbx3	1.04257e-08	1.58783e-08	FALSE	FALSE	9.70268e-10	1.66519e-08	FALSE
826	0.226376	NA	0.766234	0.666667	0.0995671	TRUE	0.494019	2 vs 1	0.199134	2 vs 1	0.532468	0.333333	Traf3:chr12:111261954-111262847:1, Traf3:chr12:111266780-111267155:1	Traf3	NA	NA	FALSE	FALSE	0.226376	NA	FALSE
827	0.0282847	0.0570528	0.326087	0.226562	0.0995245	TRUE	1.79868	3 vs 2	0.199049	3 vs 1	-0.347826	-0.546875	Mbnl2:chr14:120429217-120429642:1, Mbnl2:chr14:120429630-120430000:1, Mbnl2:chr14:120431339-120431698:1	Mbnl2	NA	NA	FALSE	FALSE	0.0570528	NA	FALSE
828	0.307328	0.292569	0.930556	0.836918	0.093638	TRUE	Inf	1 vs 3	0.198925	2 vs 5	0.277778	0.078853	Kif5a:chr10:127225694-127226006:-1, Kif5a:chr10:127225694-127226156:-1, Kif5a:chr10:127227048-127227354:-1, Kif5a:chr10:127228033-127228467:-1, Kif5a:chr10:127228261-127228462:-1	Kif5a	NA	NA	FALSE	FALSE	0.307328	NA	FALSE
829	0.620576	NA	0.842105	0.742857	0.0992481	TRUE	0.613104	1 vs 2	0.198496	1 vs 2	0.684211	0.485714	Tada2b:chr5:36473689-36473971:-1, Tada2b:chr5:36473727-36474134:-1	Tada2b	NA	NA	FALSE	FALSE	0.620576	NA	FALSE
830	0.104314	0.233378	0.704762	0.658915	0.0458472	TRUE	0.972461	1 vs 3	0.198339	2 vs 3	0.628571	0.430233	Zfp955a:chr17:33239376-33240366:-1, Zfp955a:chr17:33239735-33240049:-1, Zfp955a:chr17:33240021-33240926:-1, Zfp955a:chr17:33240236-33240472:-1	Zfp955a	NA	NA	FALSE	FALSE	0.233378	NA	FALSE
831	0.0381471	0.0949899	0.357692	0.376056	-0.018364	TRUE	-1.95119	6 vs 4	0.198131	4 vs 2	-0.259615	-0.457746	Ipp:chr4:116537732-116538176:1, Ipp:chr4:116537907-116538245:1, Ipp:chr4:116540136-116540475:1, Ipp:chr4:116540255-116540770:1, Ipp:chr4:116540540-116540807:1, Ipp:chr4:116540686-116541267:1	Ipp	NA	NA	FALSE	FALSE	0.0949899	NA	FALSE
832	0.841729	NA	0.75	0.650943	0.0990566	TRUE	0.475424	2 vs 1	0.198113	2 vs 1	0.5	0.301887	Prr18:chr17:8342835-8343133:1, Prr18:chr17:8343726-8344113:1	Prr18	NA	NA	FALSE	FALSE	0.841729	NA	FALSE
833	0.312871	0.402087	0.623932	0.522831	0.101101	TRUE	0.998529	1 vs 4	0.198103	1 vs 4	0.307692	0.109589	Zfp316:chr5:143249730-143249950:-1, Zfp316:chr5:143250831-143251162:-1, Zfp316:chr5:143251703-143252005:-1, Zfp316:chr5:143251791-143252140:-1	Zfp316	NA	NA	FALSE	FALSE	0.402087	NA	FALSE
834	0.620898	NA	0.717949	0.619048	0.0989011	TRUE	0.448801	1 vs 2	0.197802	1 vs 2	0.435897	0.238095	Sgms1:chr19:32122726-32123036:-1, Sgms1:chr19:32122848-32123193:-1	Sgms1	NA	NA	FALSE	FALSE	0.620898	NA	FALSE
835	0.0743443	0.153663	0.741722	0.642857	0.0988647	TRUE	0.467151	2 vs 1	0.197729	2 vs 1	0.483444	0.285714	Txnrd2:chr16:18437464-18437820:1, Txnrd2:chr16:18478780-18479055:1	Txnrd2	NA	NA	FALSE	FALSE	0.153663	NA	FALSE
836	0.315171	0.763077	0.285714	0.186916	0.0987984	TRUE	0.553885	2 vs 1	0.197597	2 vs 1	-0.428571	-0.626168	Socs5:chr17:87136273-87136653:1, Socs5:chr17:87137231-87137686:1	Socs5	NA	NA	FALSE	FALSE	0.763077	NA	FALSE
837	0.361562	NA	0.783333	0.710199	0.0731343	TRUE	1.07044	3 vs 4	0.197015	1 vs 4	0.6	0.402985	Ptpn4:chr1:119652458-119652850:-1, Ptpn4:chr1:119652726-119653447:-1, Ptpn4:chr1:119659745-119659999:-1, Ptpn4:chr1:119772843-119773454:-1, Ptpn4:chr1:119773212-119773289:-1	Ptpn4	NA	NA	FALSE	FALSE	0.361562	NA	FALSE
838	0.326706	NA	0.659091	0.560606	0.0984848	TRUE	0.820981	2 vs 3	0.19697	1 vs 3	0.318182	0.121212	AW549877:chr15:3982013-3982344:-1, AW549877:chr15:3985714-3986016:-1, AW549877:chr15:3985575-3986309:-1	AW549877	NA	NA	FALSE	FALSE	0.326706	NA	FALSE
839	0.308381	0.433906	0.530516	0.478632	0.051884	TRUE	0.684242	3 vs 1	0.196822	3 vs 1	0.478873	0.282051	Gdap2:chr3:100202068-100202472:1, Gdap2:chr3:100205787-100206548:1, Gdap2:chr3:100206261-100206655:1, Gdap2:chr3:100206565-100207035:1	Gdap2	NA	NA	FALSE	FALSE	0.433906	NA	FALSE
840	0.000332514	0.00023148	0.619632	0.522523	0.0971094	TRUE	#NAME?	4 vs 1	0.196319	6 vs 4	0.196319	0	Pard3:chr8:127401035-127401414:1, Pard3:chr8:127401605-127402107:1, Pard3:chr8:127402160-127402617:1, Pard3:chr8:127432732-127433147:1, Pard3:chr8:127611881-127612078:1, Pard3:chr8:127611961-127612286:1	Pard3	NA	NA	FALSE	FALSE	0.000332514	NA	FALSE
841	6.34294e-09	2.89391e-08	0.447776	0.34971	0.098066	FALSE	0.410654	1 vs 2	0.196132	1 vs 2	-0.104449	-0.300581	Ncam1:chr9:49502129-49502497:-1, Ncam1:chr9:49505033-49505369:-1	Ncam1	8.39118e-08	3.95992e-07	FALSE	FALSE	2.89391e-08	4.2003e-07	FALSE
842	0.000133907	0.0125304	0.261494	0.163484	0.0980098	FALSE	0.59431	2 vs 1	0.19602	2 vs 1	-0.477011	-0.673031	Tax1bp1:chr6:52766061-52766549:1, Tax1bp1:chr6:52766410-52766800:1	Tax1bp1	0.000829568	0.0466903	FALSE	FALSE	0.0125304	0.0522616	FALSE
843	0.360165	NA	0.861111	0.850746	0.0103648	TRUE	-1.79176	2 vs 3	0.195688	1 vs 2	0.777778	0.58209	Slc16a13:chr11:70216802-70217087:-1, Slc16a13:chr11:70217114-70217483:-1, Slc16a13:chr11:70217408-70217787:-1	Slc16a13	NA	NA	FALSE	FALSE	0.360165	NA	FALSE
844	0.517029	NA	0.944444	0.846698	0.0977463	TRUE	Inf	1 vs 3	0.195493	1 vs 3	0.888889	0.693396	Brinp2:chr1:158245264-158245631:-1, Brinp2:chr1:158245764-158245946:-1, Brinp2:chr1:158245479-158246350:-1	Brinp2	NA	NA	FALSE	FALSE	0.517029	NA	FALSE
845	0.713131	NA	0.39375	0.318606	0.0751437	TRUE	Inf	1 vs 6	0.195402	1 vs 8	0	-0.195402	Ttc39b:chr4:83220300-83220621:-1, Ttc39b:chr4:83220388-83220862:-1, Ttc39b:chr4:83221934-83222288:-1, Ttc39b:chr4:83222225-83222667:-1, Ttc39b:chr4:83225040-83225414:-1, Ttc39b:chr4:83226122-83226527:-1, Ttc39b:chr4:83225933-83226061:-1, Ttc39b:chr4:83226383-83226766:-1, Ttc39b:chr4:83226582-83227288:-1	Ttc39b	NA	NA	FALSE	FALSE	0.713131	NA	FALSE
846	0.330002	0.249707	0.549738	0.452381	0.0973573	TRUE	0.390668	1 vs 2	0.194715	1 vs 2	0.0994764	-0.0952381	Cmtm8:chr9:114789332-114789678:-1, Cmtm8:chr9:114789605-114789818:-1	Cmtm8	NA	NA	FALSE	FALSE	0.330002	NA	FALSE
847	0.201339	NA	0.758333	0.761905	-0.00357143	TRUE	1.86075	3 vs 1	0.194643	2 vs 1	0.0875	-0.107143	Myo10:chr15:25812007-25812541:1, Myo10:chr15:25812217-25812426:1, Myo10:chr15:25812988-25813730:1, Myo10:chr15:25813351-25813675:1	Myo10	NA	NA	FALSE	FALSE	0.201339	NA	FALSE
848	0.0301174	0.0579933	0.300296	0.203008	0.0972883	TRUE	0.521713	2 vs 1	0.194577	2 vs 1	-0.399408	-0.593985	Eci1:chr17:24438894-24439228:1, Eci1:chr17:24438915-24439376:1	Eci1	NA	NA	FALSE	FALSE	0.0579933	NA	FALSE
849	0.159475	0.283849	0.345794	0.248571	0.097223	FALSE	0.511867	3 vs 1	0.194446	3 vs 1	-0.308411	-0.502857	Scaf8:chr17:3198454-3198905:1, Scaf8:chr17:3206853-3207488:1, Scaf8:chr17:3207153-3207432:1	Scaf8	0.313519	0.470234	FALSE	FALSE	0.283849	0.534849	FALSE
850	0.159389	NA	0.944444	0.883065	0.0613799	TRUE	#NAME?	2 vs 1	0.194444	3 vs 2	0.944444	0.75	Krba1:chr6:48416257-48416676:1, Krba1:chr6:48416066-48416712:1, Krba1:chr6:48416570-48416904:1	Krba1	NA	NA	FALSE	FALSE	0.159389	NA	FALSE
851	0.526706	0.695223	0.571429	0.472222	0.0992063	TRUE	1.11923	1 vs 4	0.194444	1 vs 3	0	-0.194444	Zfp945:chr17:22847476-22847837:-1, Zfp945:chr17:22849041-22849367:-1, Zfp945:chr17:22849054-22849696:-1, Zfp945:chr17:22850545-22850864:-1	Zfp945	NA	NA	FALSE	FALSE	0.695223	NA	FALSE
852	0.0173282	0.0678404	0.552778	0.489664	0.0631137	TRUE	0.865655	3 vs 2	0.194186	3 vs 2	-0.383333	-0.577519	Mapk8ip2:chr15:89461738-89462483:1, Mapk8ip2:chr15:89462059-89462473:1, Mapk8ip2:chr15:89462418-89463090:1, Mapk8ip2:chr15:89464075-89464471:1	Mapk8ip2	NA	NA	FALSE	FALSE	0.0678404	NA	FALSE
853	0.123609	0.215029	0.809524	0.712451	0.0970732	TRUE	0.539603	2 vs 1	0.194146	2 vs 1	0.619048	0.424901	Bhlhe22:chr3:18056502-18056902:1, Bhlhe22:chr3:18057116-18057517:1	Bhlhe22	NA	NA	FALSE	FALSE	0.215029	NA	FALSE
854	0.269822	NA	0.307087	0.210145	0.0969417	TRUE	0.620025	1 vs 3	0.193883	1 vs 3	-0.385827	-0.57971	Eef2kmt:chr16:5244115-5244509:-1, Eef2kmt:chr16:5244882-5245159:-1, Eef2kmt:chr16:5245092-5245445:-1	Eef2kmt	NA	NA	FALSE	FALSE	0.269822	NA	FALSE
855	0.460226	0.636664	0.625	0.52809	0.0969101	TRUE	0.398348	2 vs 1	0.19382	2 vs 1	0.25	0.0561798	Amigo1:chr3:108188693-108189013:1, Amigo1:chr3:108191282-108191830:1	Amigo1	NA	NA	FALSE	FALSE	0.636664	NA	FALSE
856	0.638132	NA	0.830189	0.733333	0.0968553	TRUE	0.575364	1 vs 2	0.193711	1 vs 2	0.660377	0.466667	1700017B05Rik:chr9:57253126-57253386:-1, 1700017B05Rik:chr9:57253567-57253920:-1	1700017B05Rik	NA	NA	FALSE	FALSE	0.638132	NA	FALSE
857	0.368611	NA	1	0.903226	0.0967742	TRUE	Inf	2 vs 1	0.193548	2 vs 1	1	0.806452	Arsb:chr13:93942330-93943016:1, Arsb:chr13:93942662-93943016:1	Arsb	NA	NA	FALSE	FALSE	0.368611	NA	FALSE
858	0.0140388	0.0379639	0.578767	0.563889	0.0148782	FALSE	-0.859557	2 vs 1	0.193303	3 vs 2	-0.417808	-0.611111	Elac2:chr11:65000938-65001430:1, Elac2:chr11:65001226-65001632:1, Elac2:chr11:65001701-65002135:1	Elac2	0.0487139	0.113377	FALSE	FALSE	0.0379639	0.126381	FALSE
859	0.263323	NA	0.883721	0.787234	0.0964869	TRUE	0.719815	1 vs 2	0.192974	1 vs 2	0.767442	0.574468	Fpgt:chr3:155084914-155085262:-1, Fpgt:chr3:155084987-155085478:-1	Fpgt	NA	NA	FALSE	FALSE	0.263323	NA	FALSE
860	6.51292e-06	9.38502e-05	0.194203	0.0978865	0.0963164	FALSE	0.798003	1 vs 2	0.192633	1 vs 2	-0.611594	-0.804227	Ppp2r3c:chr12:55280760-55281206:-1, Ppp2r3c:chr12:55281482-55281859:-1	Ppp2r3c	5.25168e-05	0.000663316	FALSE	FALSE	9.38502e-05	0.000709463	FALSE
861	0.000118616	0.00103889	0.4	0.40565	-0.00564972	FALSE	1.14513	2 vs 3	0.192507	5 vs 6	0.181208	-0.0112994	Wdr26:chr1:181173226-181173586:-1, Wdr26:chr1:181173226-181173944:-1, Wdr26:chr1:181175043-181175438:-1, Wdr26:chr1:181175844-181176228:-1, Wdr26:chr1:181176885-181177599:-1, Wdr26:chr1:181177649-181178018:-1	Wdr26	0.000753209	0.00555448	FALSE	FALSE	0.00103889	0.0059972	FALSE
862	0.347999	0.478444	0.539474	0.483421	0.0560531	TRUE	0.693147	1 vs 2	0.192408	1 vs 3	0.25	0.0575916	Gopc:chr10:52337039-52337438:-1, Gopc:chr10:52337253-52337639:-1, Gopc:chr10:52338181-52338481:-1, Gopc:chr10:52338170-52338779:-1	Gopc	NA	NA	FALSE	FALSE	0.478444	NA	FALSE
863	0.00520343	0.0852013	0.290223	0.292465	-0.00224238	FALSE	-1.83275	7 vs 5	0.192146	5 vs 1	0.0188679	-0.173278	Zfp148:chr16:33497326-33497545:1, Zfp148:chr16:33497519-33498006:1, Zfp148:chr16:33497856-33498105:1, Zfp148:chr16:33498131-33498452:1, Zfp148:chr16:33498253-33498668:1, Zfp148:chr16:33501514-33501795:1, Zfp148:chr16:33501551-33502164:1, Zfp148:chr16:33501918-33502254:1, Zfp148:chr16:33502025-33502407:1, Zfp148:chr16:33502564-33503342:1, Zfp148:chr16:33502838-33503202:1, Zfp148:chr16:33503571-335…	Zfp148	0.0211467	0.204315	FALSE	FALSE	0.0852013	0.230716	FALSE
864	0.0736327	NA	0.863158	0.767196	0.0959621	FALSE	1.09861	2 vs 1	0.191924	3 vs 1	0.726316	0.534392	LTO1:chr7:144919391-144919846:1, LTO1:chr7:144920472-144921079:1, LTO1:chr7:144920774-144921137:1	LTO1	0.177277	NA	FALSE	FALSE	0.0736327	0.205299	FALSE
865	0.807798	0.907613	0.77193	0.680319	0.0916113	TRUE	0.599118	4 vs 1	0.191845	4 vs 1	0.526316	0.334471	Nrp2:chr1:62796613-62797000:1, Nrp2:chr1:62798565-62798902:1, Nrp2:chr1:62798953-62799334:1, Nrp2:chr1:62818334-62818695:1	Nrp2	NA	NA	FALSE	FALSE	0.907613	NA	FALSE
866	0.489248	0.832766	0.796296	0.715789	0.0805068	TRUE	0.916291	3 vs 1	0.191813	4 vs 2	0.444444	0.252632	Abitram:chr4:56805778-56806544:1, Abitram:chr4:56806074-56806526:1, Abitram:chr4:56806373-56806562:1, Abitram:chr4:56809240-56809605:1	Abitram	NA	NA	FALSE	FALSE	0.832766	NA	FALSE
867	0.061788	NA	0.663636	0.567797	0.0958398	TRUE	2.25129	3 vs 1	0.19168	3 vs 1	0.327273	0.135593	Lpar2:chr8:69824666-69824985:1, Lpar2:chr8:69827885-69828119:1, Lpar2:chr8:69830747-69831102:1	Lpar2	NA	NA	FALSE	FALSE	0.061788	NA	FALSE
868	0.00229813	0.013566	0.655827	0.568588	0.0872381	FALSE	2.20204	1 vs 4	0.191647	1 vs 5	0.308943	0.117296	Dusp11:chr6:85942268-85942620:-1, Dusp11:chr6:85944456-85944856:-1, Dusp11:chr6:85946994-85947164:-1, Dusp11:chr6:85947191-85947436:-1, Dusp11:chr6:85947289-85947704:-1, Dusp11:chr6:85947530-85947799:-1, Dusp11:chr6:85947686-85947799:-1	Dusp11	0.0104423	0.0498586	FALSE	FALSE	0.013566	0.0556665	FALSE
869	0.341689	0.353207	0.518519	0.438095	0.0804233	TRUE	0.733969	4 vs 3	0.191534	4 vs 2	-0.037037	-0.228571	Srek1ip1:chr13:104838037-104838356:1, Srek1ip1:chr13:104838275-104838690:1, Srek1ip1:chr13:104838788-104839284:1, Srek1ip1:chr13:104838981-104839292:1	Srek1ip1	NA	NA	FALSE	FALSE	0.353207	NA	FALSE
870	0.341814	0.199517	0.754386	0.658654	0.0957321	TRUE	0.601138	3 vs 1	0.191464	3 vs 1	0.508772	0.317308	Mettl7a1:chr15:100305124-100305439:1, Mettl7a1:chr15:100313674-100314376:1, Mettl7a1:chr15:100313988-100314345:1	Mettl7a1	NA	NA	FALSE	FALSE	0.341814	NA	FALSE
871	8.40745e-07	4.89075e-08	0.558227	0.523202	0.0350254	FALSE	-0.581488	4 vs 3	0.191373	3 vs 2	0.438472	0.2471	Pnisr:chr4:21869512-21869664:1, Pnisr:chr4:21870321-21870435:1, Pnisr:chr4:21874871-21875302:1, Pnisr:chr4:21876061-21876531:1	Pnisr	7.68162e-06	6.36849e-07	FALSE	FALSE	8.40745e-07	9.24455e-06	FALSE
872	0.000141874	0.000699085	0.42462	0.380405	0.0442146	FALSE	-1.84827	2 vs 3	0.191348	3 vs 4	-0.302905	-0.494253	Arl4c:chr1:88698196-88698579:-1, Arl4c:chr1:88698907-88699259:-1, Arl4c:chr1:88699909-88700175:-1, Arl4c:chr1:88700161-88700576:-1	Arl4c	0.00087254	0.00389237	FALSE	FALSE	0.000699085	0.00419781	FALSE
873	0.481942	NA	0.791667	0.774648	0.0170188	TRUE	-1.06087	2 vs 3	0.191315	1 vs 2	0.416667	0.225352	Lrrtm2:chr18:35211661-35212093:-1, Lrrtm2:chr18:35211919-35212553:-1, Lrrtm2:chr18:35212470-35212586:-1	Lrrtm2	NA	NA	FALSE	FALSE	0.481942	NA	FALSE
874	0.483758	0.622577	0.454545	0.358902	0.0956439	TRUE	0.397814	1 vs 2	0.191288	1 vs 2	-0.0909091	-0.282197	L1cam:chrX:73853771-73854028:-1, L1cam:chrX:73853875-73854351:-1	L1cam	NA	NA	FALSE	FALSE	0.622577	NA	FALSE
875	0.841979	NA	0.816667	0.746392	0.0702749	TRUE	Inf	1 vs 6	0.191151	1 vs 2	0.541667	0.350515	Scai:chr2:39066214-39066556:-1, Scai:chr2:39072367-39073349:-1, Scai:chr2:39072461-39073361:-1, Scai:chr2:39074377-39074916:-1, Scai:chr2:39074822-39075105:-1, Scai:chr2:39075065-39075224:-1	Scai	NA	NA	FALSE	FALSE	0.841979	NA	FALSE
876	0.431452	0.472075	0.74	0.644444	0.0955556	TRUE	0.451261	2 vs 1	0.191111	2 vs 1	0.48	0.288889	Smad7:chr18:75395282-75395910:1, Smad7:chr18:75395484-75395935:1	Smad7	NA	NA	FALSE	FALSE	0.472075	NA	FALSE
877	0.503512	NA	0.877778	0.822811	0.0549672	TRUE	Inf	1 vs 3	0.190971	1 vs 2	0.433333	0.242363	Satb2:chr1:56793969-56794242:-1, Satb2:chr1:56793973-56794451:-1, Satb2:chr1:56795305-56795574:-1, Satb2:chr1:56796091-56796431:-1	Satb2	NA	NA	FALSE	FALSE	0.503512	NA	FALSE
878	0.942321	NA	0.809524	0.714286	0.0952381	TRUE	0.530628	2 vs 1	0.190476	2 vs 1	0.619048	0.428571	Brca2:chr5:150569099-150569746:1, Brca2:chr5:150569411-150569746:1	Brca2	NA	NA	FALSE	FALSE	0.942321	NA	FALSE
879	1	NA	0.666667	0.571429	0.0952381	TRUE	0.405465	1 vs 2	0.190476	1 vs 2	0.333333	0.142857	Nrg2:chr18:36017708-36017920:-1, Nrg2:chr18:36017496-36018259:-1	Nrg2	NA	NA	FALSE	FALSE	1	NA	FALSE
880	0.0202351	0.035038	0.55	0.567623	-0.017623	TRUE	-2.27727	3 vs 4	0.190369	4 vs 5	-0.1375	-0.327869	Mettl4:chr17:94722603-94723009:-1, Mettl4:chr17:94724120-94724491:-1, Mettl4:chr17:94724111-94724785:-1, Mettl4:chr17:94725925-94726294:-1, Mettl4:chr17:94727027-94727463:-1	Mettl4	NA	NA	FALSE	FALSE	0.035038	NA	FALSE
881	0.0947036	0.268581	0.464865	0.345614	0.119251	TRUE	1.60944	5 vs 3	0.190138	6 vs 1	-0.108108	-0.298246	Pura:chr18:36288349-36288590:1, Pura:chr18:36288549-36289046:1, Pura:chr18:36289196-36289975:1, Pura:chr18:36289400-36289810:1, Pura:chr18:36291948-36292537:1, Pura:chr18:36292216-36292516:1	Pura	NA	NA	FALSE	FALSE	0.268581	NA	FALSE
882	0.00227857	0.00184257	0.555491	0.491045	0.0644466	TRUE	2.70805	9 vs 6	0.190004	10 vs 5	-0.0289017	-0.218905	Galnt1:chr18:24284646-24285090:1, Galnt1:chr18:24284935-24285208:1, Galnt1:chr18:24285029-24285374:1, Galnt1:chr18:24285246-24285713:1, Galnt1:chr18:24285710-24285985:1, Galnt1:chr18:24285614-24285867:1, Galnt1:chr18:24285801-24286134:1, Galnt1:chr18:24285972-24286243:1, Galnt1:chr18:24286105-24286476:1, Galnt1:chr18:24286284-24286630:1, Galnt1:chr18:24286458-24286831:1	Galnt1	NA	NA	FALSE	FALSE	0.00227857	NA	FALSE
883	1.97171e-08	2.37949e-07	0.581876	0.493625	0.0882508	FALSE	1.11158	4 vs 2	0.18986	4 vs 1	0.166181	-0.0236794	Smarcc1:chr9:110234904-110235337:1, Smarcc1:chr9:110237846-110238373:1, Smarcc1:chr9:110238369-110239074:1, Smarcc1:chr9:110238805-110239199:1, Smarcc1:chr9:110238941-110239161:1, Smarcc1:chr9:110239786-110240177:1, Smarcc1:chr9:110239617-110240251:1	Smarcc1	2.36233e-07	2.74435e-06	FALSE	FALSE	2.37949e-07	2.93394e-06	FALSE
884	1	NA	1	0.905172	0.0948276	TRUE	Inf	1 vs 2	0.189655	1 vs 2	1	0.810345	Sema4f:chr6:82911881-82912225:-1, Sema4f:chr6:82912999-82913343:-1	Sema4f	NA	NA	FALSE	FALSE	1	NA	FALSE
885	0.524957	0.53225	0.638889	0.575758	0.0631313	TRUE	0.980829	2 vs 3	0.189394	2 vs 3	-0.0833333	-0.272727	Spty2d1:chr7:46990389-46990698:-1, Spty2d1:chr7:46990560-46990770:-1, Spty2d1:chr7:46990513-46991230:-1, Spty2d1:chr7:46992677-46993021:-1	Spty2d1	NA	NA	FALSE	FALSE	0.53225	NA	FALSE
886	0.0300991	0.0562392	0.51046	0.415781	0.0946788	FALSE	0.402289	1 vs 3	0.189358	1 vs 3	0.0209205	-0.168437	Atp6v1a:chr16:44085396-44085755:-1, Atp6v1a:chr16:44085396-44086111:-1, Atp6v1a:chr16:44086259-44086676:-1	Atp6v1a	0.0892086	0.149683	FALSE	FALSE	0.0562392	0.168851	FALSE
887	0.497318	0.727077	0.561856	0.491667	0.070189	TRUE	0.693147	4 vs 2	0.189347	4 vs 1	0.42268	0.233333	Zfp516:chr18:83002347-83002714:1, Zfp516:chr18:83002090-83002989:1, Zfp516:chr18:83004587-83004875:1, Zfp516:chr18:83004793-83005381:1, Zfp516:chr18:83005004-83005239:1	Zfp516	NA	NA	FALSE	FALSE	0.727077	NA	FALSE
888	0.0122329	NA	0.623077	0.550562	0.0725151	TRUE	2.89037	4 vs 6	0.189283	4 vs 6	0.0769231	-0.11236	Txndc16:chr14:45133465-45133865:-1, Txndc16:chr14:45134547-45135076:-1, Txndc16:chr14:45134874-45135243:-1, Txndc16:chr14:45167340-45167710:-1, Txndc16:chr14:45208009-45208249:-1, Txndc16:chr14:45208006-45208491:-1	Txndc16	NA	NA	FALSE	FALSE	0.0122329	NA	FALSE
889	4.23878e-16	1.56536e-14	0.830717	0.781074	0.0496437	FALSE	0.446742	3 vs 2	0.189138	3 vs 2	0.429372	0.240234	Paip2:chr18:35616164-35616327:1, Paip2:chr18:35616131-35616592:1, Paip2:chr18:35616789-35617215:1	Paip2	1.00621e-14	3.54327e-13	FALSE	FALSE	1.56536e-14	3.75096e-13	FALSE
890	0.0223917	NA	1	0.905556	0.0944444	TRUE	Inf	2 vs 1	0.188889	2 vs 1	1	0.811111	Gtpbp2:chr17:46168739-46169402:1, Gtpbp2:chr17:46169015-46169375:1	Gtpbp2	NA	NA	FALSE	FALSE	0.0223917	NA	FALSE
891	9.14563e-41	1.48732e-30	0.735636	0.641253	0.0943832	FALSE	0.530186	1 vs 2	0.188766	1 vs 3	0.471272	0.282505	Ptov1:chr7:44863061-44863371:-1, Ptov1:chr7:44863348-44863470:-1, Ptov1:chr7:44863452-44863723:-1	Ptov1	5.53093e-39	8.18703e-29	FALSE	FALSE	1.48732e-30	8.5859e-29	FALSE
892	0.0699264	0.18307	0.35545	0.261146	0.0943037	TRUE	0.444851	2 vs 1	0.188607	2 vs 1	-0.2891	-0.477707	Tmem98:chr11:80821655-80822012:1, Tmem98:chr11:80821876-80822275:1	Tmem98	NA	NA	FALSE	FALSE	0.18307	NA	FALSE
893	0.321887	0.427483	0.617647	0.563636	0.0540107	TRUE	-1.05444	2 vs 3	0.188503	3 vs 6	0.196078	0.00757576	Miga1:chr3:152273818-152274175:-1, Miga1:chr3:152273528-152274465:-1, Miga1:chr3:152275922-152276296:-1, Miga1:chr3:152281563-152281911:-1, Miga1:chr3:152281730-152282044:-1, Miga1:chr3:152332436-152332763:-1	Miga1	NA	NA	FALSE	FALSE	0.427483	NA	FALSE
894	0.0018729	0.00582683	0.880567	0.794335	0.0862318	FALSE	1.05273	1 vs 3	0.188229	1 vs 2	0.631579	0.44335	Ubl3:chr5:148504613-148504995:-1, Ubl3:chr5:148505062-148505546:-1, Ubl3:chr5:148505923-148506280:-1	Ubl3	0.0088259	0.0245436	FALSE	FALSE	0.00582683	0.027057	FALSE
895	0.00443698	0.020834	0.260606	0.167164	0.0934419	FALSE	0.563039	2 vs 1	0.186884	2 vs 1	-0.478788	-0.665672	Mettl2:chr11:105139971-105140437:1, Mettl2:chr11:105140743-105141150:1	Mettl2	0.0184149	0.0721887	FALSE	FALSE	0.020834	0.0799371	FALSE
896	0.641063	NA	0.326923	0.285714	0.0412088	TRUE	0.847298	2 vs 3	0.186813	2 vs 3	-0.384615	-0.571429	Lactb2:chr1:13625911-13626178:-1, Lactb2:chr1:13625930-13626350:-1, Lactb2:chr1:13626629-13627156:-1	Lactb2	NA	NA	FALSE	FALSE	0.641063	NA	FALSE
897	0.00826459	0.000616441	0.430065	0.322222	0.107843	TRUE	1.32687	1 vs 4	0.186741	2 vs 6	-0.0196078	-0.206349	Armc8:chr9:99478371-99478739:-1, Armc8:chr9:99480078-99480387:-1, Armc8:chr9:99480032-99480755:-1, Armc8:chr9:99518828-99519103:-1, Armc8:chr9:99518664-99519359:-1, Armc8:chr9:99519952-99520337:-1	Armc8	NA	NA	FALSE	FALSE	0.00826459	NA	FALSE
898	0.08441	0.15018	0.641176	0.548077	0.0930995	TRUE	0.38757	1 vs 2	0.186199	1 vs 2	0.282353	0.0961538	Ifna12:chr4:88599218-88599419:-1, Ifna12:chr4:88599084-88599989:-1	Ifna12	NA	NA	FALSE	FALSE	0.15018	NA	FALSE
899	0.695619	0.876204	0.776316	0.7631	0.0132154	TRUE	1.20032	1 vs 2	0.186164	1 vs 2	0.631579	0.445415	Kcnn1:chr8:70843135-70843499:-1, Kcnn1:chr8:70843053-70843747:-1, Kcnn1:chr8:70843748-70844327:-1, Kcnn1:chr8:70843952-70844204:-1, Kcnn1:chr8:70844011-70844440:-1	Kcnn1	NA	NA	FALSE	FALSE	0.876204	NA	FALSE
900	0.0760051	0.0652406	0.680154	0.58701	0.0931443	TRUE	0.749633	4 vs 1	0.18614	4 vs 1	0.410405	0.224265	Mark3:chr12:111655531-111655788:1, Mark3:chr12:111655359-111655856:1, Mark3:chr12:111655406-111656093:1, Mark3:chr12:111655947-111656151:1	Mark3	NA	NA	FALSE	FALSE	0.0760051	NA	FALSE
901	0.0145085	0.0149751	0.623737	0.530726	0.0930111	FALSE	0.40129	1 vs 3	0.186022	1 vs 3	0.247475	0.0614525	Sinhcaf:chr6:148921047-148921368:-1, Sinhcaf:chr6:148921090-148921672:-1, Sinhcaf:chr6:148922676-148923017:-1	Sinhcaf	0.0497994	0.0542149	FALSE	FALSE	0.0149751	0.0604719	FALSE
902	0.368739	0.583464	0.51	0.42029	0.0897101	TRUE	0.70557	2 vs 1	0.185797	2 vs 1	-0.22	-0.405797	Lars2:chr9:123461833-123462156:1, Lars2:chr9:123462173-123462623:1, Lars2:chr9:123462339-123462672:1	Lars2	NA	NA	FALSE	FALSE	0.583464	NA	FALSE
903	1	NA	0.8	0.707317	0.0926829	TRUE	0.503905	2 vs 1	0.185366	2 vs 1	0.6	0.414634	Kctd7:chr5:130154418-130154900:1, Kctd7:chr5:130154754-130155133:1	Kctd7	NA	NA	FALSE	FALSE	1	NA	FALSE
904	0.0311426	0.0493646	0.739726	0.72449	0.0152362	FALSE	-0.97601	2 vs 1	0.185071	3 vs 2	0.205479	0.0204082	Eml4:chr17:83478960-83479615:1, Eml4:chr17:83479373-83479780:1, Eml4:chr17:83479935-83480364:1	Eml4	0.0913421	0.136873	FALSE	FALSE	0.0493646	0.154037	FALSE
905	0.315616	0.417839	0.67619	0.606771	0.0694196	TRUE	0.583146	4 vs 2	0.185045	4 vs 2	0.442857	0.257812	Plxnb1:chr9:109118389-109118631:1, Plxnb1:chr9:109118594-109119031:1, Plxnb1:chr9:109119021-109119189:1, Plxnb1:chr9:109119526-109119971:1	Plxnb1	NA	NA	FALSE	FALSE	0.417839	NA	FALSE
906	9.38819e-05	0.000574604	0.374121	0.320031	0.0540903	FALSE	0.426041	1 vs 3	0.184976	2 vs 3	0.285513	0.100537	Commd6:chr14:101632973-101633255:-1, Commd6:chr14:101633738-101634169:-1, Commd6:chr14:101634052-101634421:-1	Commd6	0.000606769	0.00325162	FALSE	FALSE	0.000574604	0.00349999	FALSE
907	0.174491	0.0358701	0.816038	0.723577	0.0924605	TRUE	0.668756	3 vs 1	0.184921	3 vs 1	0.632075	0.447154	Ppp1r15b:chr1:133136586-133137061:1, Ppp1r15b:chr1:133138067-133138461:1, Ppp1r15b:chr1:133139433-133139800:1	Ppp1r15b	NA	NA	FALSE	FALSE	0.174491	NA	FALSE
908	8.90845e-06	0.000122293	0.391803	0.299451	0.0923518	FALSE	0.410173	2 vs 1	0.184704	2 vs 1	-0.216393	-0.401097	Cited2:chr10:17724414-17724938:1, Cited2:chr10:17725268-17725696:1	Cited2	7.00541e-05	0.000841459	FALSE	FALSE	0.000122293	0.00090036	FALSE
909	0.338899	0.373445	0.657534	0.565217	0.0923169	TRUE	0.389961	2 vs 1	0.184634	2 vs 1	0.315068	0.130435	Pard6b:chr2:168100588-168101203:1, Pard6b:chr2:168100856-168101203:1	Pard6b	NA	NA	FALSE	FALSE	0.373445	NA	FALSE
910	0.270778	0.414078	0.813953	0.721713	0.092241	TRUE	0.522934	1 vs 2	0.184482	1 vs 2	0.627907	0.443425	Mpp3:chr11:101999632-102000003:-1, Mpp3:chr11:102000188-102000693:-1	Mpp3	NA	NA	FALSE	FALSE	0.414078	NA	FALSE
911	0.107024	0.194839	0.503049	0.525362	-0.0223135	TRUE	-1.1474	4 vs 3	0.184459	5 vs 4	-0.158537	-0.342995	Fam222b:chr11:78155464-78156275:1, Fam222b:chr11:78155730-78156030:1, Fam222b:chr11:78156203-78156596:1, Fam222b:chr11:78156363-78156704:1, Fam222b:chr11:78156923-78157302:1	Fam222b	NA	NA	FALSE	FALSE	0.194839	NA	FALSE
912	0.0381428	0.101235	0.263636	0.197917	0.0657197	TRUE	2.19722	1 vs 2	0.183838	1 vs 4	0.0727273	-0.111111	Slco3a1:chr7:74275409-74275719:-1, Slco3a1:chr7:74281820-74282102:-1, Slco3a1:chr7:74281851-74282366:-1, Slco3a1:chr7:74282986-74283894:-1, Slco3a1:chr7:74284209-74284570:-1	Slco3a1	NA	NA	FALSE	FALSE	0.101235	NA	FALSE
913	0.34608	NA	0.392157	0.309524	0.0826331	TRUE	0.875469	1 vs 2	0.183473	1 vs 2	-0.0784314	-0.261905	Arsk:chr13:76060712-76061218:-1, Arsk:chr13:76061958-76062161:-1, Arsk:chr13:76061990-76062465:-1	Arsk	NA	NA	FALSE	FALSE	0.34608	NA	FALSE
914	0.00453028	0.012755	0.589431	0.497768	0.091663	FALSE	1.45913	1 vs 3	0.183326	1 vs 3	0.178862	-0.00446429	2310057M21Rik:chr7:131342686-131343079:-1, 2310057M21Rik:chr7:131343154-131343573:-1, 2310057M21Rik:chr7:131343477-131343858:-1	2310057M21Rik	0.0187409	0.0473811	FALSE	FALSE	0.012755	0.0528509	FALSE
915	0.0053446	0.0149159	0.809969	0.718447	0.0915222	FALSE	0.513039	2 vs 1	0.183044	2 vs 1	0.619938	0.436893	Itgb1:chr8:128732140-128732730:1, Itgb1:chr8:128732772-128733238:1	Itgb1	0.0215481	0.0540812	FALSE	FALSE	0.0149159	0.0603285	FALSE
916	0.204202	0.357322	0.679348	0.587838	0.09151	TRUE	0.627158	2 vs 3	0.18302	1 vs 3	0.358696	0.175676	2510009E07Rik:chr16:21649045-21649425:-1, 2510009E07Rik:chr16:21649524-21650154:-1, 2510009E07Rik:chr16:21676649-21677081:-1	2510009E07Rik	NA	NA	FALSE	FALSE	0.357322	NA	FALSE
917	0.205463	0.34986	0.464623	0.373134	0.0914883	TRUE	0.377048	2 vs 1	0.182977	2 vs 1	-0.0707547	-0.253731	Aif1l:chr2:31971415-31971879:1, Aif1l:chr2:31973019-31973442:1	Aif1l	NA	NA	FALSE	FALSE	0.34986	NA	FALSE
918	0.234396	NA	0.25	0.158537	0.0914634	TRUE	0.570545	2 vs 1	0.182927	2 vs 1	-0.5	-0.682927	Pdcd11:chr19:47130804-47131159:1, Pdcd11:chr19:47131541-47131855:1	Pdcd11	NA	NA	FALSE	FALSE	0.234396	NA	FALSE
919	0.139604	0.266144	0.396266	0.388235	0.00803027	TRUE	0.653926	3 vs 2	0.182817	3 vs 2	-0.170124	-0.352941	Pi4k2b:chr5:52767814-52768418:1, Pi4k2b:chr5:52768109-52768337:1, Pi4k2b:chr5:52768957-52769347:1	Pi4k2b	NA	NA	FALSE	FALSE	0.266144	NA	FALSE
920	0.0429325	0.0582073	0.709635	0.643137	0.0664982	TRUE	0.958523	1 vs 5	0.182659	1 vs 2	0.0885417	-0.0941176	Zdhhc20:chr14:57832759-57833097:-1, Zdhhc20:chr14:57835623-57836106:-1, Zdhhc20:chr14:57836121-57836413:-1, Zdhhc20:chr14:57836023-57836666:-1, Zdhhc20:chr14:57836305-57836748:-1	Zdhhc20	NA	NA	FALSE	FALSE	0.0582073	NA	FALSE
921	0.511627	NA	1	0.909091	0.0909091	TRUE	Inf	2 vs 1	0.181818	2 vs 1	1	0.818182	Akr1b8:chr6:34368090-34368248:1, Akr1b8:chr6:34368117-34368463:1	Akr1b8	NA	NA	FALSE	FALSE	0.511627	NA	FALSE
922	0.615561	NA	0.555556	0.464912	0.0906433	TRUE	1.09861	1 vs 4	0.181818	1 vs 4	0.181818	0	Eml5:chr12:98786999-98787599:-1, Eml5:chr12:98787268-98787526:-1, Eml5:chr12:98789087-98789505:-1, Eml5:chr12:98789447-98789984:-1	Eml5	NA	NA	FALSE	FALSE	0.615561	NA	FALSE
923	1	NA	1	0.909091	0.0909091	TRUE	Inf	1 vs 2	0.181818	1 vs 2	1	0.818182	Fbxo41:chr6:85469578-85469879:-1, Fbxo41:chr6:85469670-85470003:-1	Fbxo41	NA	NA	FALSE	FALSE	1	NA	FALSE
924	1	NA	1	0.909091	0.0909091	TRUE	Inf	2 vs 1	0.181818	2 vs 1	1	0.818182	Pcdhb2:chr18:37297122-37297336:1, Pcdhb2:chr18:37297226-37297626:1	Pcdhb2	NA	NA	FALSE	FALSE	1	NA	FALSE
925	0.153216	0.19239	0.705628	0.6	0.105628	TRUE	0.823859	2 vs 3	0.18161	1 vs 4	0.38961	0.208	Dennd11:chr6:40401374-40401681:-1, Dennd11:chr6:40401414-40401798:-1, Dennd11:chr6:40401374-40402486:-1, Dennd11:chr6:40406338-40406730:-1	Dennd11	NA	NA	FALSE	FALSE	0.19239	NA	FALSE
926	0.106521	0.260201	0.454955	0.354938	0.100017	TRUE	1.17865	1 vs 3	0.181557	1 vs 4	-0.202703	-0.384259	Nr2f2:chr7:70351937-70352294:-1, Nr2f2:chr7:70353436-70353774:-1, Nr2f2:chr7:70353870-70354683:-1, Nr2f2:chr7:70354423-70354838:-1	Nr2f2	NA	NA	FALSE	FALSE	0.260201	NA	FALSE
927	0.0475408	0.0598598	0.534884	0.545333	-0.0104496	TRUE	-1.97045	1 vs 5	0.181395	2 vs 4	-0.418605	-0.6	Mysm1:chr4:94942040-94942400:-1, Mysm1:chr4:94942182-94942477:-1, Mysm1:chr4:94942316-94942591:-1, Mysm1:chr4:94942658-94943103:-1, Mysm1:chr4:94942981-94943238:-1, Mysm1:chr4:94946896-94947222:-1	Mysm1	NA	NA	FALSE	FALSE	0.0598598	NA	FALSE
928	4.22582e-16	4.34995e-05	0.609431	0.518796	0.0906352	FALSE	0.369702	2 vs 1	0.18127	2 vs 1	0.218862	0.0375914	Psma4:chr9:54957555-54957804:1, Psma4:chr9:54957669-54958030:1	Psma4	1.00621e-14	0.000333405	FALSE	FALSE	4.34995e-05	0.00035873	FALSE
929	0.883753	NA	0.5	0.409639	0.0903614	TRUE	0.36546	1 vs 2	0.180723	1 vs 2	0	-0.180723	Slit1:chr19:41597809-41598196:-1, Slit1:chr19:41600197-41600617:-1	Slit1	NA	NA	FALSE	FALSE	0.883753	NA	FALSE
930	0.185427	0.158554	0.670635	0.580292	0.0903429	FALSE	0.433108	3 vs 1	0.180686	3 vs 1	0.34127	0.160584	Mfsd1:chr3:67602700-67603099:1, Mfsd1:chr3:67602695-67603355:1, Mfsd1:chr3:67603835-67604258:1	Mfsd1	0.3493	0.320638	FALSE	FALSE	0.185427	0.400839	FALSE
931	0.201992	0.694532	0.662879	0.6	0.0628788	TRUE	0.90364	1 vs 4	0.180556	1 vs 2	-0.125	-0.305556	Slc11a2:chr15:100387892-100388217:-1, Slc11a2:chr15:100388753-100389106:-1, Slc11a2:chr15:100392589-100393048:-1, Slc11a2:chr15:100392958-100393311:-1	Slc11a2	NA	NA	FALSE	FALSE	0.694532	NA	FALSE
932	0.730413	0.72893	0.451923	0.443878	0.00804553	TRUE	1.29928	2 vs 3	0.180534	2 vs 3	0.384615	0.204082	Zfp438:chr18:5209904-5210177:-1, Zfp438:chr18:5209993-5210340:-1, Zfp438:chr18:5210170-5210425:-1, Zfp438:chr18:5210388-5210659:-1, Zfp438:chr18:5210475-5210793:-1	Zfp438	NA	NA	FALSE	FALSE	0.730413	NA	FALSE
933	0.529553	0.535342	0.598131	0.520833	0.0772975	TRUE	0.702717	2 vs 3	0.180491	1 vs 3	0.242991	0.0625	Abraxas1:chr5:100805124-100805562:-1, Abraxas1:chr5:100805611-100805915:-1, Abraxas1:chr5:100805773-100806045:-1, Abraxas1:chr5:100805524-100806406:-1	Abraxas1	NA	NA	FALSE	FALSE	0.535342	NA	FALSE
934	0.382411	0.51776	0.863636	0.773585	0.0900515	TRUE	0.617161	2 vs 1	0.180103	2 vs 1	0.727273	0.54717	Zbtb39:chr10:127746789-127747310:1, Zbtb39:chr10:127747013-127747349:1	Zbtb39	NA	NA	FALSE	FALSE	0.51776	NA	FALSE
935	5.89432e-10	1.01041e-08	0.524137	0.491548	0.0325882	FALSE	0.563646	3 vs 4	0.179835	3 vs 4	-0.0847724	-0.264608	Pcmt1:chr10:7629362-7629724:-1, Pcmt1:chr10:7630147-7630580:-1, Pcmt1:chr10:7630672-7631034:-1, Pcmt1:chr10:7637914-7638159:-1, Pcmt1:chr10:7638011-7638288:-1	Pcmt1	8.85892e-09	1.45667e-07	FALSE	FALSE	1.01041e-08	1.52764e-07	FALSE
936	0.567569	0.681071	0.414545	0.377786	0.0367598	TRUE	1.79176	2 vs 8	0.179767	1 vs 5	0.1	-0.0797665	Pou2f2:chr7:25087298-25087725:-1, Pou2f2:chr7:25088146-25088356:-1, Pou2f2:chr7:25088236-25088492:-1, Pou2f2:chr7:25088300-25088622:-1, Pou2f2:chr7:25088300-25088736:-1, Pou2f2:chr7:25089249-25089700:-1, Pou2f2:chr7:25089783-25090017:-1, Pou2f2:chr7:25089627-25090203:-1, Pou2f2:chr7:25091065-25091531:-1, Pou2f2:chr7:25091501-25091896:-1, Pou2f2:chr7:25092518-25092811:-1, Pou2f2:chr7:25092381-2509…	Pou2f2	NA	NA	FALSE	FALSE	0.681071	NA	FALSE
937	0.108537	0.354363	0.199119	0.16035	0.0387691	FALSE	Inf	1 vs 2	0.179679	4 vs 6	-0.348018	-0.527697	Rasa1:chr13:85214812-85215111:-1, Rasa1:chr13:85214653-85215144:-1, Rasa1:chr13:85215058-85215374:-1, Rasa1:chr13:85214880-85215995:-1, Rasa1:chr13:85215380-85215634:-1, Rasa1:chr13:85215941-85216352:-1	Rasa1	0.23603	0.546081	FALSE	FALSE	0.354363	0.61284	FALSE
938	0.475011	NA	0.450855	0.391386	0.0594689	TRUE	1.59109	7 vs 6	0.179631	7 vs 3	0.0897436	-0.0898876	Pcdh10:chr3:45382646-45383087:1, Pcdh10:chr3:45399309-45399376:1, Pcdh10:chr3:45399285-45399599:1, Pcdh10:chr3:45400967-45401302:1, Pcdh10:chr3:45423365-45423686:1, Pcdh10:chr3:45432517-45432798:1, Pcdh10:chr3:45432613-45433049:1	Pcdh10	NA	NA	FALSE	FALSE	0.475011	NA	FALSE
939	0.245098	0.18308	0.736791	0.681981	0.0548093	TRUE	Inf	2 vs 1	0.179425	8 vs 4	0.239726	0.0603015	Vkorc1l1:chr5:129982108-129982295:1, Vkorc1l1:chr5:129982237-129982565:1, Vkorc1l1:chr5:129982373-129982780:1, Vkorc1l1:chr5:129982534-129982888:1, Vkorc1l1:chr5:129984245-129984493:1, Vkorc1l1:chr5:129984306-129984676:1, Vkorc1l1:chr5:129984457-129984738:1, Vkorc1l1:chr5:129986308-129986738:1	Vkorc1l1	NA	NA	FALSE	FALSE	0.245098	NA	FALSE
940	0.398963	NA	0.170732	0.0810811	0.0896506	TRUE	0.847298	1 vs 2	0.179301	1 vs 2	-0.658537	-0.837838	Tctn3:chr19:40592933-40593230:-1, Tctn3:chr19:40596426-40596798:-1	Tctn3	NA	NA	FALSE	FALSE	0.398963	NA	FALSE
941	0.915727	NA	0.541667	0.542088	-0.000420875	TRUE	-0.782759	2 vs 1	0.179293	3 vs 2	0.25	0.0707071	Spock2:chr10:60131863-60132189:1, Spock2:chr10:60134662-60135199:1, Spock2:chr10:60134883-60135204:1, Spock2:chr10:60135018-60135229:1	Spock2	NA	NA	FALSE	FALSE	0.915727	NA	FALSE
942	6.33442e-05	4.13833e-05	0.681159	0.591687	0.0894724	FALSE	0.388161	2 vs 1	0.178945	2 vs 1	0.362319	0.183374	Rpp30:chr19:36104283-36104561:1, Rpp30:chr19:36104372-36104793:1	Rpp30	0.000424523	0.000320225	FALSE	FALSE	6.33442e-05	0.000496587	FALSE
943	0.156711	0.285975	0.479452	0.390037	0.0894146	TRUE	0.491414	3 vs 2	0.178829	3 vs 1	-0.0410959	-0.219925	Ina:chr19:47024073-47024320:1, Ina:chr19:47024385-47024929:1, Ina:chr19:47024926-47025327:1	Ina	NA	NA	FALSE	FALSE	0.285975	NA	FALSE
944	0.279319	NA	0.9	0.810606	0.0893939	TRUE	0.743272	2 vs 1	0.178788	2 vs 1	0.8	0.621212	Slc44a1:chr4:53549709-53550277:1, Slc44a1:chr4:53567387-53567854:1	Slc44a1	NA	NA	FALSE	FALSE	0.279319	NA	FALSE
945	0.35897	NA	0.775862	0.686567	0.0892949	TRUE	0.457594	1 vs 2	0.17859	1 vs 2	0.551724	0.373134	Evi5:chr5:107744795-107745148:-1, Evi5:chr5:107747127-107747644:-1	Evi5	NA	NA	FALSE	FALSE	0.35897	NA	FALSE
946	0.881676	NA	0.714286	0.625	0.0892857	TRUE	0.405465	2 vs 1	0.178571	2 vs 1	0.428571	0.25	Nek2:chr1:191832543-191833075:1, Nek2:chr1:191832747-191833044:1	Nek2	NA	NA	FALSE	FALSE	0.881676	NA	FALSE
947	0.508332	0.41299	0.714286	0.625	0.0892857	TRUE	0.405465	1 vs 2	0.178571	1 vs 2	0.428571	0.25	Rhobtb2:chr14:69784984-69785338:-1, Rhobtb2:chr14:69787159-69787570:-1	Rhobtb2	NA	NA	FALSE	FALSE	0.508332	NA	FALSE
948	4.23687e-09	4.99059e-08	0.612027	0.576036	0.0359919	FALSE	-0.786834	3 vs 4	0.178376	1 vs 3	0.0649485	-0.113428	Hnrnpll:chr17:80029486-80029893:-1, Hnrnpll:chr17:80029517-80030597:-1, Hnrnpll:chr17:80029831-80030176:-1, Hnrnpll:chr17:80030466-80030562:-1	Hnrnpll	5.81711e-08	6.46374e-07	FALSE	FALSE	4.99059e-08	6.85194e-07	FALSE
949	1.65356e-05	0.000180716	0.455988	0.366887	0.089101	FALSE	0.36909	2 vs 1	0.178202	2 vs 1	-0.0880231	-0.266225	Rab6a:chr7:100639790-100640181:1, Rab6a:chr7:100640852-100641305:1	Rab6a	0.00012689	0.00120245	FALSE	FALSE	0.000180716	0.00128938	FALSE
950	0.271562	0.357511	0.78325	0.777778	0.00547228	TRUE	-1.43056	2 vs 4	0.177889	1 vs 2	0.585296	0.407407	Zfp36l1:chr12:80107754-80108118:-1, Zfp36l1:chr12:80107813-80108629:-1, Zfp36l1:chr12:80108664-80109101:-1, Zfp36l1:chr12:80109141-80109700:-1	Zfp36l1	NA	NA	FALSE	FALSE	0.357511	NA	FALSE
951	0.310218	0.599447	0.48913	0.462687	0.0264439	TRUE	0.732164	1 vs 2	0.177807	1 vs 2	-0.456522	-0.634328	Klhl2:chr8:64739673-64739945:-1, Klhl2:chr8:64739742-64740278:-1, Klhl2:chr8:64740475-64741040:-1	Klhl2	NA	NA	FALSE	FALSE	0.599447	NA	FALSE
952	0.814066	NA	0.777778	0.766667	0.0111111	TRUE	-0.916291	2 vs 1	0.177778	3 vs 2	0.444444	0.266667	Dnaaf4:chr9:72972339-72972556:1, Dnaaf4:chr9:72972448-72972890:1, Dnaaf4:chr9:72972721-72973051:1	Dnaaf4	NA	NA	FALSE	FALSE	0.814066	NA	FALSE
953	0.873682	NA	0.533333	0.444444	0.0888889	TRUE	0.356675	1 vs 2	0.177778	1 vs 2	0.0666667	-0.111111	Fam184a:chr10:53633109-53633519:-1, Fam184a:chr10:53633261-53633755:-1	Fam184a	NA	NA	FALSE	FALSE	0.873682	NA	FALSE
954	1	NA	1	0.911111	0.0888889	TRUE	Inf	2 vs 1	0.177778	2 vs 1	1	0.822222	Oprl1:chr2:181720251-181720972:1, Oprl1:chr2:181720633-181720985:1	Oprl1	NA	NA	FALSE	FALSE	1	NA	FALSE
955	0.0303731	0.0459943	0.776923	0.688073	0.0888497	FALSE	0.599621	1 vs 3	0.177699	1 vs 3	0.553846	0.376147	Tram1:chr1:13564698-13565147:-1, Tram1:chr1:13565601-13566145:-1, Tram1:chr1:13566235-13566455:-1	Tram1	0.0898109	0.131211	FALSE	FALSE	0.0459943	0.146398	FALSE
956	0.329776	0.215394	0.854545	0.786885	0.0676602	TRUE	1.14991	3 vs 1	0.177645	3 vs 2	0.472727	0.295082	Srd5a3:chr5:76154664-76155030:1, Srd5a3:chr5:76154886-76155192:1, Srd5a3:chr5:76155103-76155483:1	Srd5a3	NA	NA	FALSE	FALSE	0.329776	NA	FALSE
957	0.00238953	0.00282357	0.590708	0.509804	0.080904	TRUE	1.72427	2 vs 1	0.177598	2 vs 1	-0.283186	-0.460784	Odf2:chr2:29922167-29922568:1, Odf2:chr2:29930758-29931431:1, Odf2:chr2:29931407-29931755:1	Odf2	NA	NA	FALSE	FALSE	0.00282357	NA	FALSE
958	0.458925	0.465241	0.409836	0.371212	0.0386239	TRUE	0.427079	2 vs 3	0.177596	2 vs 3	0.344262	0.166667	Gdf11:chr10:128881042-128881319:-1, Gdf11:chr10:128881910-128882254:-1, Gdf11:chr10:128882258-128882676:-1	Gdf11	NA	NA	FALSE	FALSE	0.465241	NA	FALSE
959	0.467025	NA	0.632653	0.54386	0.0887934	TRUE	0.367725	2 vs 1	0.177587	2 vs 1	0.265306	0.0877193	Rft1:chr14:30690700-30691317:1, Rft1:chr14:30691036-30691306:1	Rft1	NA	NA	FALSE	FALSE	0.467025	NA	FALSE
960	0.0354367	0.0154522	0.485251	0.422545	0.0627058	TRUE	1.69018	7 vs 1	0.177579	3 vs 1	0.0530973	-0.124481	Nsd3:chr8:25663238-25663615:1, Nsd3:chr8:25674235-25674827:1, Nsd3:chr8:25674450-25674857:1, Nsd3:chr8:25674565-25674912:1, Nsd3:chr8:25676618-25677387:1, Nsd3:chr8:25677545-25678057:1, Nsd3:chr8:25714298-25714713:1	Nsd3	NA	NA	FALSE	FALSE	0.0354367	NA	FALSE
961	0.0511016	NA	0.945055	0.856287	0.0887675	FALSE	1.06012	2 vs 1	0.177535	2 vs 1	0.89011	0.712575	Tm9sf4:chr2:153208518-153208876:1, Tm9sf4:chr2:153210048-153210466:1	Tm9sf4	0.135489	NA	FALSE	FALSE	0.0511016	0.157327	FALSE
962	0.0517331	0.226464	0.705128	0.616462	0.0886659	FALSE	0.39728	2 vs 1	0.177332	2 vs 1	0.410256	0.232925	Capn10:chr1:92940493-92941039:1, Capn10:chr1:92947585-92947970:1	Capn10	0.136735	0.409019	FALSE	FALSE	0.226464	0.46501	FALSE
963	0.00467241	0.00660705	0.199561	0.122368	0.077193	FALSE	0.711797	2 vs 1	0.177193	2 vs 1	-0.570175	-0.747368	Zfp41:chr15:75624895-75625333:1, Zfp41:chr15:75627143-75627403:1, Zfp41:chr15:75629433-75629827:1	Zfp41	0.0192349	0.0274953	FALSE	FALSE	0.00660705	0.030402	FALSE
964	0.0228384	0.0584253	0.241206	0.152672	0.0885343	FALSE	0.567719	2 vs 1	0.177069	2 vs 1	-0.517588	-0.694656	Bcl2l13:chr6:120888623-120889035:1, Bcl2l13:chr6:120892579-120892842:1	Bcl2l13	0.0716166	0.153978	FALSE	FALSE	0.0584253	0.174384	FALSE
965	2.88303e-08	1.30028e-07	0.527511	0.439248	0.0882632	FALSE	0.511921	3 vs 1	0.176526	3 vs 1	0.0550229	-0.121503	Ak2:chr4:129008045-129008358:1, Ak2:chr4:129010494-129010775:1, Ak2:chr4:129011130-129011529:1	Ak2	3.35912e-07	1.53145e-06	FALSE	FALSE	1.30028e-07	1.64602e-06	FALSE
966	0.984493	NA	1	0.911765	0.0882353	TRUE	Inf	2 vs 1	0.176471	2 vs 1	1	0.823529	Ccdc71l:chr12:32382338-32382904:1, Ccdc71l:chr12:32382576-32382940:1	Ccdc71l	NA	NA	FALSE	FALSE	0.984493	NA	FALSE
967	0.423381	NA	0.228571	0.140351	0.0882206	TRUE	0.595983	2 vs 1	0.176441	2 vs 1	-0.542857	-0.719298	Snx19:chr9:30465405-30465750:1, Snx19:chr9:30466265-30466844:1	Snx19	NA	NA	FALSE	FALSE	0.423381	NA	FALSE
968	1.51525e-11	1.8694e-09	0.772097	0.683892	0.0882047	FALSE	0.448472	1 vs 2	0.176409	1 vs 2	0.544193	0.367784	Myl12a:chr17:70994293-70994594:-1, Myl12a:chr17:70994189-70994828:-1	Myl12a	2.63611e-10	2.95926e-08	FALSE	FALSE	1.8694e-09	3.10344e-08	FALSE
969	0.198397	NA	0.670213	0.642857	0.0273556	TRUE	1.70475	2 vs 3	0.176102	2 vs 3	0.595745	0.419643	Ppip5k2:chr1:97706019-97706612:-1, Ppip5k2:chr1:97706185-97706467:-1, Ppip5k2:chr1:97706558-97707029:-1	Ppip5k2	NA	NA	FALSE	FALSE	0.198397	NA	FALSE
970	0.0905423	0.201244	0.515337	0.427562	0.0877756	FALSE	0.353175	1 vs 2	0.175551	1 vs 2	0.0306748	-0.144876	Phc1:chr6:122317662-122318163:-1, Phc1:chr6:122318254-122318675:-1	Phc1	0.207	0.373784	FALSE	FALSE	0.201244	0.427035	FALSE
971	0.000218818	0.000468192	0.848558	0.8024	0.0461577	FALSE	-1.60944	4 vs 2	0.175485	5 vs 4	0.677885	0.5024	Pkia:chr3:7442436-7443106:1, Pkia:chr3:7443150-7443436:1, Pkia:chr3:7442889-7443302:1, Pkia:chr3:7443740-7444208:1, Pkia:chr3:7444960-7445366:1	Pkia	0.00129256	0.00270635	FALSE	FALSE	0.000468192	0.0029076	FALSE
972	0.25082	NA	0.677966	0.590278	0.0876883	TRUE	0.379327	1 vs 2	0.175377	1 vs 2	0.355932	0.180556	Frmd4b:chr6:97286868-97287171:-1, Frmd4b:chr6:97286920-97287468:-1	Frmd4b	NA	NA	FALSE	FALSE	0.25082	NA	FALSE
973	0.335461	NA	0.734884	0.613333	0.12155	TRUE	Inf	1 vs 3	0.17416	1 vs 6	0.418605	0.244444	Dpy19l3:chr7:35685435-35685868:-1, Dpy19l3:chr7:35688765-35689155:-1, Dpy19l3:chr7:35689378-35689649:-1, Dpy19l3:chr7:35689530-35689719:-1, Dpy19l3:chr7:35689574-35689937:-1, Dpy19l3:chr7:35689838-35690449:-1	Dpy19l3	NA	NA	FALSE	FALSE	0.335461	NA	FALSE
974	0.177703	NA	0.94	0.852941	0.0870588	TRUE	0.993677	2 vs 1	0.174118	2 vs 1	0.88	0.705882	Nmrk1:chr19:18651421-18651672:1, Nmrk1:chr19:18651964-18652162:1	Nmrk1	NA	NA	FALSE	FALSE	0.177703	NA	FALSE
975	0.38488	0.609721	0.563207	0.556999	0.00620802	TRUE	-1.50408	7 vs 6	0.174043	8 vs 7	0.194245	0.020202	Adamts10:chr17:33528792-33529116:1, Adamts10:chr17:33528504-33529577:1, Adamts10:chr17:33529744-33530027:1, Adamts10:chr17:33531536-33531947:1, Adamts10:chr17:33532272-33532676:1, Adamts10:chr17:33532521-33532844:1, Adamts10:chr17:33532906-33533120:1, Adamts10:chr17:33553390-33553787:1	Adamts10	NA	NA	FALSE	FALSE	0.609721	NA	FALSE
976	0.00208713	0.0124266	0.494253	0.43109	0.0631631	TRUE	1.1137	3 vs 1	0.17374	3 vs 2	-0.505747	-0.679487	Fam177a2:chr12:55213741-55214147:1, Fam177a2:chr12:55214259-55214690:1, Fam177a2:chr12:55216733-55217168:1	Fam177a2	NA	NA	FALSE	FALSE	0.0124266	NA	FALSE
977	0.216792	0.309387	0.466387	0.380221	0.0861654	FALSE	0.523248	5 vs 4	0.173559	5 vs 1	-0.0672269	-0.240786	Rwdd4a:chr8:47550634-47550924:1, Rwdd4a:chr8:47550609-47551513:1, Rwdd4a:chr8:47550990-47551304:1, Rwdd4a:chr8:47551435-47551936:1, Rwdd4a:chr8:47552408-47552837:1	Rwdd4a	0.38833	0.49856	FALSE	FALSE	0.309387	0.563328	FALSE
978	0.625336	0.751303	0.764706	0.677928	0.086778	TRUE	0.434389	2 vs 1	0.173556	2 vs 1	0.529412	0.355856	Ppp1r14c:chr10:3463350-3463469:1, Ppp1r14c:chr10:3464612-3464982:1	Ppp1r14c	NA	NA	FALSE	FALSE	0.751303	NA	FALSE
979	0.800737	NA	0.566667	0.48	0.0866667	TRUE	0.441833	1 vs 2	0.173333	1 vs 3	0.133333	-0.04	Pigb:chr9:73013368-73013626:-1, Pigb:chr9:73013380-73013819:-1, Pigb:chr9:73013608-73014115:-1	Pigb	NA	NA	FALSE	FALSE	0.800737	NA	FALSE
980	0.0406813	0.0866121	0.557037	0.578571	-0.0215344	TRUE	-1.97408	1 vs 6	0.173214	2 vs 4	0.2	0.0267857	Trip4:chr9:65828902-65829373:-1, Trip4:chr9:65829845-65830247:-1, Trip4:chr9:65831688-65832164:-1, Trip4:chr9:65832175-65832650:-1, Trip4:chr9:65833041-65833499:-1, Trip4:chr9:65833248-65833510:-1	Trip4	NA	NA	FALSE	FALSE	0.0866121	NA	FALSE
981	0.0431085	0.0681498	0.384762	0.301587	0.0831746	FALSE	1.1314	1 vs 2	0.172789	1 vs 4	-0.228571	-0.401361	Fam53b:chr7:132712067-132712427:-1, Fam53b:chr7:132712761-132713142:-1, Fam53b:chr7:132715375-132715726:-1, Fam53b:chr7:132759256-132759595:-1	Fam53b	0.118144	0.173719	FALSE	FALSE	0.0681498	0.195328	FALSE
982	3.88887e-05	0.000444662	0.528128	0.518593	0.00953466	FALSE	0.885232	1 vs 2	0.172399	1 vs 2	-0.38539	-0.557789	Brwd1:chr16:95998704-95999063:-1, Brwd1:chr16:96066631-96067048:-1, Brwd1:chr16:96066670-96067383:-1, Brwd1:chr16:96068119-96068553:-1	Brwd1	0.000272866	0.00260006	FALSE	FALSE	0.000444662	0.00280773	FALSE
983	0.442162	0.572549	0.813636	0.752717	0.060919	TRUE	0.939671	1 vs 3	0.172332	1 vs 3	0.563636	0.391304	Pgap1:chr1:54472994-54473337:-1, Pgap1:chr1:54475382-54475650:-1, Pgap1:chr1:54475578-54475803:-1, Pgap1:chr1:54475212-54476100:-1, Pgap1:chr1:54479071-54479386:-1	Pgap1	NA	NA	FALSE	FALSE	0.572549	NA	FALSE
984	0.0167535	NA	0.120482	0.0344828	0.0859992	FALSE	1.34433	1 vs 2	0.171998	1 vs 2	-0.759036	-0.931034	Arhgap12:chr18:6024427-6024825:-1, Arhgap12:chr18:6025174-6025562:-1	Arhgap12	0.0556259	NA	FALSE	FALSE	0.0167535	0.0663866	FALSE
985	0.0145939	0.0310648	0.309013	0.291045	0.0179681	FALSE	-1.13242	1 vs 2	0.171674	2 vs 3	0.171674	0	Ap3m1:chr14:21033693-21034130:-1, Ap3m1:chr14:21034748-21035197:-1, Ap3m1:chr14:21035741-21036109:-1	Ap3m1	0.0499681	0.0978399	FALSE	FALSE	0.0310648	0.107793	FALSE
986	0.602662	NA	0.868421	0.782609	0.0858124	TRUE	0.606136	2 vs 1	0.171625	2 vs 1	0.736842	0.565217	Ctso:chr3:81954985-81955615:1, Ctso:chr3:81955250-81955574:1	Ctso	NA	NA	FALSE	FALSE	0.602662	NA	FALSE
987	1	NA	0.285714	0.2	0.0857143	TRUE	0.470004	1 vs 2	0.171429	1 vs 2	-0.428571	-0.6	Cckar:chr5:53698545-53698740:-1, Cckar:chr5:53698573-53699052:-1	Cckar	NA	NA	FALSE	FALSE	1	NA	FALSE
988	0.665531	NA	0.681818	0.596154	0.0856643	TRUE	0.372675	1 vs 2	0.171329	1 vs 2	0.363636	0.192308	Usp36:chr11:118259650-118259980:-1, Usp36:chr11:118260818-118261204:-1	Usp36	NA	NA	FALSE	FALSE	0.665531	NA	FALSE
989	0.603018	NA	0.935484	0.85	0.0854839	TRUE	0.939548	2 vs 1	0.170968	2 vs 1	0.870968	0.7	Kat2b:chr17:53672077-53672747:1, Kat2b:chr17:53672359-53672740:1	Kat2b	NA	NA	FALSE	FALSE	0.603018	NA	FALSE
990	0.0532608	0.0303454	0.926407	0.881279	0.0451284	FALSE	-2.0149	2 vs 1	0.170966	4 vs 3	0.62987	0.458904	Crkl:chr16:17483775-17483970:1, Crkl:chr16:17483903-17484499:1, Crkl:chr16:17486427-17486866:1, Crkl:chr16:17487060-17487448:1	Crkl	0.139899	0.0961575	FALSE	FALSE	0.0532608	0.162795	FALSE
991	0.023595	0.0523062	0.635854	0.550409	0.0854456	FALSE	0.355093	1 vs 2	0.170891	1 vs 2	0.271709	0.100817	Hccs:chrX:169311520-169311856:-1, Hccs:chrX:169311739-169312186:-1	Hccs	0.0735354	0.141844	FALSE	FALSE	0.0523062	0.160418	FALSE
992	2.41358e-07	1.16251e-06	0.864598	0.779153	0.0854453	FALSE	0.593281	2 vs 1	0.170891	2 vs 1	0.729196	0.558305	Gpm6a:chr8:55059800-55060642:1, Gpm6a:chr8:55060455-55060905:1	Gpm6a	2.44335e-06	1.17807e-05	FALSE	FALSE	1.16251e-06	1.25117e-05	FALSE
993	0.360132	0.162507	0.6875	0.60221	0.0852901	TRUE	0.373776	1 vs 2	0.17058	1 vs 2	0.375	0.20442	Hspa1a:chr17:34969372-34969610:-1, Hspa1a:chr17:34969706-34970122:-1	Hspa1a	NA	NA	FALSE	FALSE	0.360132	NA	FALSE
994	0.0272568	0.108209	0.53267	0.458183	0.074487	TRUE	2.14007	8 vs 1	0.170455	8 vs 1	0.170455	0	Lcor:chr19:41559176-41559921:1, Lcor:chr19:41559585-41559776:1, Lcor:chr19:41561857-41562251:1, Lcor:chr19:41565632-41565951:1, Lcor:chr19:41567153-41567638:1, Lcor:chr19:41567355-41567670:1, Lcor:chr19:41587024-41587315:1, Lcor:chr19:41595554-41596160:1, Lcor:chr19:41595840-41596160:1	Lcor	NA	NA	FALSE	FALSE	0.108209	NA	FALSE
995	0.119471	0.281619	0.635036	0.55	0.0850365	TRUE	0.815844	1 vs 3	0.170073	1 vs 3	0.270073	0.1	C330007P06Rik:chrX:36848544-36848863:-1, C330007P06Rik:chrX:36848542-36849126:-1, C330007P06Rik:chrX:36850276-36850716:-1	C330007P06Rik	NA	NA	FALSE	FALSE	0.281619	NA	FALSE
996	0.000101184	0.00102965	0.274707	0.18969	0.0850172	FALSE	0.554972	1 vs 2	0.170034	1 vs 3	-0.450586	-0.620621	Nsa2:chr13:97129393-97129781:-1, Nsa2:chr13:97130299-97130761:-1, Nsa2:chr13:97130983-97131298:-1	Nsa2	0.000650651	0.0055418	FALSE	FALSE	0.00102965	0.00597102	FALSE
997	0.0214381	NA	0.987179	0.90224	0.0849392	TRUE	2.12144	1 vs 2	0.169878	1 vs 2	0.974359	0.804481	Rasgef1b:chr5:99217385-99217776:-1, Rasgef1b:chr5:99375023-99375336:-1	Rasgef1b	NA	NA	FALSE	FALSE	0.0214381	NA	FALSE
998	0.0283102	0.107794	0.368098	0.348285	0.0198127	TRUE	-0.450386	3 vs 2	0.169639	2 vs 1	-0.0245399	-0.194179	Nrp1:chr8:128503009-128503370:1, Nrp1:chr8:128503845-128504642:1, Nrp1:chr8:128505061-128505536:1	Nrp1	NA	NA	FALSE	FALSE	0.107794	NA	FALSE
999	0.353128	NA	0.741379	0.656566	0.0848137	TRUE	0.405123	2 vs 1	0.169627	2 vs 1	0.482759	0.313131	Gys1:chr7:45456097-45456579:1, Gys1:chr7:45456283-45456536:1	Gys1	NA	NA	FALSE	FALSE	0.353128	NA	FALSE
1000	0.0161544	0.0553359	0.830357	0.798817	0.0315406	TRUE	1.83258	3 vs 4	0.169432	2 vs 4	0.133929	-0.035503	Wasl:chr6:24613805-24614169:-1, Wasl:chr6:24615872-24616205:-1, Wasl:chr6:24616213-24616376:-1, Wasl:chr6:24632609-24633088:-1	Wasl	NA	NA	FALSE	FALSE	0.0553359	NA	FALSE
1001	0.103173	NA	0.904149	0.817204	0.0869445	TRUE	1.38629	2 vs 4	0.169251	1 vs 4	0.798283	0.629032	Nedd9:chr13:41309918-41310377:-1, Nedd9:chr13:41310954-41311347:-1, Nedd9:chr13:41311179-41311405:-1, Nedd9:chr13:41311265-41311774:-1	Nedd9	NA	NA	FALSE	FALSE	0.103173	NA	FALSE
1002	0.0760418	NA	0.25	0.243243	0.00675676	TRUE	#NAME?	2 vs 1	0.168919	3 vs 2	0.25	0.0810811	Mbnl1:chr3:60629081-60629351:1, Mbnl1:chr3:60628866-60629521:1, Mbnl1:chr3:60629452-60629770:1	Mbnl1	NA	NA	FALSE	FALSE	0.0760418	NA	FALSE
1003	0.388993	NA	0.784348	0.7	0.0843478	TRUE	0.443888	2 vs 1	0.168696	2 vs 1	0.568696	0.4	Uhrf1:chr17:56322370-56322714:1, Uhrf1:chr17:56323115-56323486:1	Uhrf1	NA	NA	FALSE	FALSE	0.388993	NA	FALSE
1004	1.27727e-260	6.07242e-202	0.731402	0.706323	0.0250791	FALSE	-0.97067	2 vs 4	0.168654	1 vs 2	0.276188	0.107535	H3f3b:chr11:116022237-116022678:-1, H3f3b:chr11:116022812-116023249:-1, H3f3b:chr11:116023026-116023427:-1, H3f3b:chr11:116023115-116023910:-1	H3f3b	1.08142e-257	4.90247e-199	FALSE	FALSE	6.07242e-202	5.14131e-199	FALSE
1005	0.393766	0.428019	0.305	0.321888	-0.0168884	TRUE	-0.916291	3 vs 2	0.168498	2 vs 1	0.22	0.0515021	Rhbdd2:chr5:135643228-135643740:1, Rhbdd2:chr5:135643777-135644181:1, Rhbdd2:chr5:135644139-135644364:1, Rhbdd2:chr5:135644215-135644529:1, Rhbdd2:chr5:135645947-135646356:1	Rhbdd2	NA	NA	FALSE	FALSE	0.428019	NA	FALSE
1006	0.00997501	0.0166711	0.484483	0.369343	0.11514	TRUE	2.05412	1 vs 6	0.168387	1 vs 5	-0.258621	-0.427007	Raph1:chr1:60482271-60482750:-1, Raph1:chr1:60483156-60483490:-1, Raph1:chr1:60483492-60483749:-1, Raph1:chr1:60483368-60483953:-1, Raph1:chr1:60485093-60485468:-1, Raph1:chr1:60486075-60486376:-1	Raph1	NA	NA	FALSE	FALSE	0.0166711	NA	FALSE
1007	0.23947	0.109896	0.533333	0.447761	0.0855721	TRUE	Inf	1 vs 3	0.16791	1 vs 4	-0.05	-0.21791	Tmcc1:chr6:116018611-116018954:-1, Tmcc1:chr6:116021176-116021484:-1, Tmcc1:chr6:116021114-116021883:-1, Tmcc1:chr6:116021337-116021676:-1	Tmcc1	NA	NA	FALSE	FALSE	0.23947	NA	FALSE
1008	0.0927943	0.178525	0.564972	0.533835	0.0311372	TRUE	0.547193	2 vs 3	0.167877	2 vs 3	0.310734	0.142857	Ckap4:chr10:84526291-84526543:-1, Ckap4:chr10:84526227-84526847:-1, Ckap4:chr10:84527369-84527797:-1	Ckap4	NA	NA	FALSE	FALSE	0.178525	NA	FALSE
1009	1	NA	0.6	0.516129	0.083871	TRUE	0.340927	1 vs 2	0.167742	1 vs 2	0.2	0.0322581	Catsper2:chr2:121392592-121393007:-1, Catsper2:chr2:121394406-121394523:-1	Catsper2	NA	NA	FALSE	FALSE	1	NA	FALSE
1010	0.021837	0.0455202	0.25102	0.191366	0.0596544	FALSE	0.494734	1 vs 3	0.167689	2 vs 3	-0.240816	-0.408505	Slc25a51:chr4:45395920-45396196:-1, Slc25a51:chr4:45395980-45396458:-1, Slc25a51:chr4:45398387-45398786:-1	Slc25a51	0.0690736	0.130473	FALSE	FALSE	0.0455202	0.145435	FALSE
1011	0.151749	0.455839	0.683099	0.62707	0.0560282	TRUE	1.23428	3 vs 4	0.1676	2 vs 4	0.253521	0.0859213	Rbfox3:chr11:118489760-118490116:-1, Rbfox3:chr11:118490078-118490490:-1, Rbfox3:chr11:118491103-118491556:-1, Rbfox3:chr11:118491117-118491635:-1, Rbfox3:chr11:118491957-118492337:-1	Rbfox3	NA	NA	FALSE	FALSE	0.455839	NA	FALSE
1012	0.20868	0.184868	0.746226	0.74375	0.00247642	TRUE	#NAME?	1 vs 3	0.167453	3 vs 4	0.0424528	-0.125	Nedd1:chr10:92684737-92685025:-1, Nedd1:chr10:92684819-92685149:-1, Nedd1:chr10:92684501-92685607:-1, Nedd1:chr10:92685065-92685405:-1, Nedd1:chr10:92685594-92686229:-1, Nedd1:chr10:92685986-92686358:-1	Nedd1	NA	NA	FALSE	FALSE	0.20868	NA	FALSE
1013	0.0706507	0.0975787	0.626214	0.590807	0.0354064	FALSE	0.429037	3 vs 2	0.167291	3 vs 2	-0.334951	-0.502242	Lysmd3:chr13:81669731-81670272:1, Lysmd3:chr13:81671198-81671601:1, Lysmd3:chr13:81672483-81672892:1	Lysmd3	0.171725	0.227246	FALSE	FALSE	0.0975787	0.255515	FALSE
1014	0.660196	NA	0.633333	0.596899	0.0364341	TRUE	0.396415	1 vs 2	0.166667	1 vs 2	-0.166667	-0.333333	Aph1c:chr9:66818916-66819167:-1, Aph1c:chr9:66819034-66819242:-1, Aph1c:chr9:66818911-66819583:-1	Aph1c	NA	NA	FALSE	FALSE	0.660196	NA	FALSE
1015	0.314217	0.305766	0.399471	0.346939	0.0525321	TRUE	0.693147	3 vs 1	0.166667	2 vs 1	0.166667	0	Atp6v0a2:chr5:124721652-124722181:1, Atp6v0a2:chr5:124722250-124722725:1, Atp6v0a2:chr5:124723901-124724455:1, Atp6v0a2:chr5:124724142-124724442:1	Atp6v0a2	NA	NA	FALSE	FALSE	0.314217	NA	FALSE
1016	1	NA	1	0.916667	0.0833333	TRUE	Inf	2 vs 1	0.166667	2 vs 1	1	0.833333	Gfpt2:chr11:49838104-49838331:1, Gfpt2:chr11:49838253-49838628:1	Gfpt2	NA	NA	FALSE	FALSE	1	NA	FALSE
1017	1	NA	1	0.916667	0.0833333	TRUE	Inf	1 vs 2	0.166667	1 vs 2	1	0.833333	H2-T22:chr17:36038406-36038695:-1, H2-T22:chr17:36038359-36038830:-1	H2-T22	NA	NA	FALSE	FALSE	1	NA	FALSE
1018	0.907354	NA	0.541667	0.5	0.0416667	TRUE	#NAME?	1 vs 2	0.166667	2 vs 3	-0.333333	-0.5	Itga1:chr13:114953139-114953499:-1, Itga1:chr13:114953592-114953994:-1, Itga1:chr13:114954348-114954678:-1	Itga1	NA	NA	FALSE	FALSE	0.907354	NA	FALSE
1019	0.909291	NA	1	0.916667	0.0833333	TRUE	Inf	1 vs 2	0.166667	1 vs 2	1	0.833333	Klc3:chr7:19394428-19394791:-1, Klc3:chr7:19394863-19394945:-1	Klc3	NA	NA	FALSE	FALSE	0.909291	NA	FALSE
1020	0.688331	NA	0.833333	0.75	0.0833333	TRUE	0.510826	1 vs 2	0.166667	1 vs 2	0.666667	0.5	Nova1:chr12:46697866-46698244:-1, Nova1:chr12:46697823-46698616:-1	Nova1	NA	NA	FALSE	FALSE	0.688331	NA	FALSE
1021	0.662521	NA	0.895833	0.8125	0.0833333	TRUE	0.685425	1 vs 2	0.166667	1 vs 2	0.791667	0.625	Septin1:chr7:127214461-127214771:-1, Septin1:chr7:127214442-127215114:-1	Septin1	NA	NA	FALSE	FALSE	0.662521	NA	FALSE
1022	1	NA	0.333333	0.25	0.0833333	TRUE	0.405465	2 vs 1	0.166667	2 vs 1	-0.333333	-0.5	Slc39a8:chr3:135887854-135888554:1, Slc39a8:chr3:135888112-135888355:1	Slc39a8	NA	NA	FALSE	FALSE	1	NA	FALSE
1023	1	NA	0.75	0.666667	0.0833333	TRUE	0.405465	1 vs 2	0.166667	1 vs 2	0.5	0.333333	Zfp977:chr7:42579222-42579533:-1, Zfp977:chr7:42579251-42579707:-1	Zfp977	NA	NA	FALSE	FALSE	1	NA	FALSE
1024	0.0410044	NA	0.121212	0.0379747	0.0832374	TRUE	1.25112	1 vs 2	0.166475	1 vs 2	-0.757576	-0.924051	Gorasp1:chr9:119925654-119925985:-1, Gorasp1:chr9:119926557-119926933:-1	Gorasp1	NA	NA	FALSE	FALSE	0.0410044	NA	FALSE
1025	0.32282	NA	0.712871	0.701887	0.0109845	TRUE	Inf	4 vs 1	0.166262	6 vs 5	0.524752	0.358491	Tead1:chr7:112898946-112899572:1, Tead1:chr7:112904586-112904928:1, Tead1:chr7:112905484-112906017:1, Tead1:chr7:112905785-112906675:1, Tead1:chr7:112906194-112906555:1, Tead1:chr7:112906438-112906788:1	Tead1	NA	NA	FALSE	FALSE	0.32282	NA	FALSE
1026	0.212231	NA	0.152542	0.0694444	0.0830979	TRUE	0.880456	2 vs 1	0.166196	2 vs 1	-0.694915	-0.861111	Cnnm3:chr1:36526894-36527221:1, Cnnm3:chr1:36527727-36528244:1	Cnnm3	NA	NA	FALSE	FALSE	0.212231	NA	FALSE
1027	0.831358	NA	0.961538	0.92	0.0415385	TRUE	0.826679	3 vs 2	0.166154	3 vs 2	0.846154	0.68	Slc2a12:chr10:22702816-22703194:1, Slc2a12:chr10:22703449-22703948:1, Slc2a12:chr10:22704006-22704272:1	Slc2a12	NA	NA	FALSE	FALSE	0.831358	NA	FALSE
1028	1.01964e-05	8.08174e-06	0.863095	0.767008	0.0960869	FALSE	1.53148	3 vs 2	0.16614	4 vs 1	0.696429	0.530289	Cacfd1:chr2:27016311-27016921:1, Cacfd1:chr2:27017023-27017464:1, Cacfd1:chr2:27020132-27021083:1, Cacfd1:chr2:27020706-27021113:1	Cacfd1	7.94441e-05	7.11781e-05	FALSE	FALSE	1.01964e-05	9.34974e-05	FALSE
1029	0.313107	0.470105	0.556225	0.510703	0.0455215	TRUE	0.664976	1 vs 2	0.166077	1 vs 3	0.138554	-0.0275229	Samhd1:chr2:157097519-157097886:-1, Samhd1:chr2:157098645-157098996:-1, Samhd1:chr2:157099367-157099569:-1, Samhd1:chr2:157104778-157104937:-1	Samhd1	NA	NA	FALSE	FALSE	0.470105	NA	FALSE
1030	0.561599	NA	0.807692	0.796875	0.0108173	TRUE	Inf	1 vs 3	0.165865	2 vs 3	0.384615	0.21875	Zscan18:chr7:12768095-12768359:-1, Zscan18:chr7:12768117-12768505:-1, Zscan18:chr7:12768417-12768671:-1	Zscan18	NA	NA	FALSE	FALSE	0.561599	NA	FALSE
1031	0.0229942	0.181641	0.466245	0.470037	-0.00379273	TRUE	-1.27297	1 vs 3	0.165695	3 vs 4	-0.0253165	-0.191011	Tbc1d15:chr10:115197033-115197336:-1, Tbc1d15:chr10:115198433-115198831:-1, Tbc1d15:chr10:115198648-115199395:-1, Tbc1d15:chr10:115199361-115199786:-1	Tbc1d15	NA	NA	FALSE	FALSE	0.181641	NA	FALSE
1032	0.487168	0.620683	0.725664	0.642857	0.0828066	TRUE	0.384945	1 vs 2	0.165613	1 vs 2	0.451327	0.285714	Nog:chr11:89300631-89301004:-1, Nog:chr11:89300963-89301478:-1	Nog	NA	NA	FALSE	FALSE	0.620683	NA	FALSE
1033	0.128363	0.0315725	0.282187	0.286778	-0.00459145	TRUE	-1.22121	4 vs 2	0.165144	2 vs 1	0.343915	0.178771	Sin3a:chr9:57127775-57128169:1, Sin3a:chr9:57127954-57128392:1, Sin3a:chr9:57128970-57129169:1, Sin3a:chr9:57129728-57129937:1	Sin3a	NA	NA	FALSE	FALSE	0.128363	NA	FALSE
1034	3.41672e-10	2.24329e-08	0.31061	0.288751	0.0218594	FALSE	-0.482705	3 vs 2	0.165069	2 vs 1	-0.0964062	-0.261475	Skp1:chr11:52245899-52246286:1, Skp1:chr11:52246205-52246694:1, Skp1:chr11:52246465-52246852:1	Skp1	5.25968e-09	3.10471e-07	FALSE	FALSE	2.24329e-08	3.29361e-07	FALSE
1035	0.485613	NA	0.477642	0.395161	0.082481	TRUE	0.353534	3 vs 1	0.164962	3 vs 1	-0.0447154	-0.209677	Add3:chr19:53245016-53245551:1, Add3:chr19:53245472-53245967:1, Add3:chr19:53246702-53247127:1	Add3	NA	NA	FALSE	FALSE	0.485613	NA	FALSE
1036	0.0938121	0.219325	0.536	0.453532	0.0824684	TRUE	0.330661	2 vs 1	0.164937	2 vs 1	0.072	-0.0929368	Soga3:chr10:29198893-29199123:1, Soga3:chr10:29199250-29199657:1	Soga3	NA	NA	FALSE	FALSE	0.219325	NA	FALSE
1037	0.109017	0.043252	0.537037	0.458947	0.0780897	TRUE	Inf	5 vs 1	0.164912	6 vs 2	0.333333	0.168421	Ankle2:chr5:110254328-110254694:1, Ankle2:chr5:110254953-110255541:1, Ankle2:chr5:110255470-110256038:1, Ankle2:chr5:110255671-110255907:1, Ankle2:chr5:110256047-110256653:1, Ankle2:chr5:110256289-110256654:1	Ankle2	NA	NA	FALSE	FALSE	0.109017	NA	FALSE
1038	0.140901	0.368204	0.536765	0.53373	0.00303455	TRUE	-0.790453	3 vs 1	0.164799	5 vs 3	0.323529	0.15873	Zfp30:chr7:29793419-29793823:1, Zfp30:chr7:29793302-29793838:1, Zfp30:chr7:29793616-29794018:1, Zfp30:chr7:29793788-29793945:1, Zfp30:chr7:29794357-29794706:1	Zfp30	NA	NA	FALSE	FALSE	0.368204	NA	FALSE
1039	0.152398	0.00545375	0.353175	0.322409	0.0307661	FALSE	0.575287	1 vs 4	0.164618	1 vs 4	-0.179894	-0.344512	Dhdds:chr4:133969025-133969375:-1, Dhdds:chr4:133969036-133969559:-1, Dhdds:chr4:133970440-133971270:-1, Dhdds:chr4:133970730-133971048:-1, Dhdds:chr4:133970832-133971284:-1	Dhdds	0.301943	0.0231737	FALSE	FALSE	0.152398	0.351896	FALSE
1040	0.0102601	0.0240036	0.791667	0.707736	0.0839303	FALSE	1.3493	1 vs 3	0.164332	1 vs 4	0.574074	0.409742	Gtf2ird1:chr5:134357656-134357996:-1, Gtf2ird1:chr5:134358267-134358618:-1, Gtf2ird1:chr5:134358249-134358796:-1, Gtf2ird1:chr5:134358667-134358934:-1	Gtf2ird1	0.0373899	0.0807453	FALSE	FALSE	0.0240036	0.0888762	FALSE
1041	0.156469	0.188961	0.51	0.461172	0.0488283	TRUE	2.42037	4 vs 5	0.164294	3 vs 7	0.088	-0.0762943	Appl1:chr14:26917791-26918124:-1, Appl1:chr14:26918330-26918785:-1, Appl1:chr14:26918928-26919411:-1, Appl1:chr14:26921226-26921542:-1, Appl1:chr14:26921912-26922439:-1, Appl1:chr14:26922029-26922544:-1, Appl1:chr14:26922785-26923203:-1, Appl1:chr14:26923591-26923800:-1, Appl1:chr14:26923495-26923960:-1	Appl1	NA	NA	FALSE	FALSE	0.188961	NA	FALSE
1042	0.513984	0.565866	0.367816	0.285714	0.0821018	TRUE	0.374693	2 vs 1	0.164204	2 vs 1	-0.264368	-0.428571	Diaph2:chrX:130460842-130461184:1, Diaph2:chrX:130465430-130465838:1	Diaph2	NA	NA	FALSE	FALSE	0.565866	NA	FALSE
1043	0.574414	0.940009	0.439815	0.35743	0.0823851	TRUE	0.348104	1 vs 4	0.164157	1 vs 4	-0.125	-0.289157	Ankrd26:chr6:118501300-118501680:-1, Ankrd26:chr6:118501300-118501949:-1, Ankrd26:chr6:118502562-118502908:-1, Ankrd26:chr6:118502907-118503353:-1	Ankrd26	NA	NA	FALSE	FALSE	0.940009	NA	FALSE
1044	0.408158	NA	0.689815	0.607843	0.0819717	TRUE	0.626339	3 vs 1	0.163943	3 vs 1	0.37963	0.215686	Emb:chr13:117273004-117273187:1, Emb:chr13:117272982-117273433:1, Emb:chr13:117273730-117274151:1	Emb	NA	NA	FALSE	FALSE	0.408158	NA	FALSE
1045	0.386132	NA	0.964286	0.882353	0.0819328	TRUE	1.28093	1 vs 2	0.163866	1 vs 2	0.928571	0.764706	Camta2:chr11:70669461-70669756:-1, Camta2:chr11:70669464-70670009:-1	Camta2	NA	NA	FALSE	FALSE	0.386132	NA	FALSE
1046	1.85877e-12	8.73138e-10	0.292922	0.229412	0.0635102	FALSE	1.68036	2 vs 5	0.163611	2 vs 3	0.0707804	-0.0928309	Epha5:chr5:84054364-84054852:-1, Epha5:chr5:84054714-84055152:-1, Epha5:chr5:84065504-84065827:-1, Epha5:chr5:84065354-84066153:-1, Epha5:chr5:84066324-84066521:-1, Epha5:chr5:84066855-84067366:-1	Epha5	3.49724e-11	1.4386e-08	FALSE	FALSE	8.73138e-10	1.50869e-08	FALSE
1047	0.599216	0.722477	0.503401	0.448179	0.0552221	TRUE	0.620388	1 vs 3	0.163265	1 vs 3	-0.122449	-0.285714	Tsga10:chr1:37832369-37832795:-1, Tsga10:chr1:37832606-37833151:-1, Tsga10:chr1:37832718-37832956:-1, Tsga10:chr1:37833374-37834160:-1	Tsga10	NA	NA	FALSE	FALSE	0.722477	NA	FALSE
1048	0.656756	NA	0.421053	0.37	0.0510526	TRUE	0.81093	1 vs 2	0.163158	1 vs 2	0.263158	0.1	Cdkl5:chrX:160801410-160801664:-1, Cdkl5:chrX:160801378-160802137:-1, Cdkl5:chrX:160801644-160801950:-1	Cdkl5	NA	NA	FALSE	FALSE	0.656756	NA	FALSE
1049	0.240526	NA	0.349206	0.340067	0.00913901	TRUE	-1.3173	1 vs 2	0.163059	2 vs 3	-0.190476	-0.353535	Zfp119a:chr17:55862333-55862851:-1, Zfp119a:chr17:55862649-55863151:-1, Zfp119a:chr17:55864888-55865231:-1, Zfp119a:chr17:55864694-55865733:-1	Zfp119a	NA	NA	FALSE	FALSE	0.240526	NA	FALSE
1050	0.603892	NA	0.327103	0.277778	0.049325	TRUE	0.660357	2 vs 3	0.163032	2 vs 3	-0.392523	-0.555556	Tex9:chr9:72458505-72458971:-1, Tex9:chr9:72459716-72460005:-1, Tex9:chr9:72461121-72461347:-1	Tex9	NA	NA	FALSE	FALSE	0.603892	NA	FALSE
1051	0.279581	NA	0.8	0.71875	0.08125	TRUE	0.448025	2 vs 1	0.1625	2 vs 1	0.6	0.4375	Entpd4b:chr14:69568201-69568600:1, Entpd4b:chr14:69584533-69584972:1	Entpd4b	NA	NA	FALSE	FALSE	0.279581	NA	FALSE
1052	0.80394	NA	0.435484	0.358025	0.0774592	TRUE	1.09861	1 vs 2	0.162485	1 vs 4	-0.0967742	-0.259259	Gusb:chr5:129988970-129989390:-1, Gusb:chr5:129989223-129989535:-1, Gusb:chr5:129998670-129998959:-1, Gusb:chr5:129999591-129999954:-1	Gusb	NA	NA	FALSE	FALSE	0.80394	NA	FALSE
1053	0.00193894	0.00415702	0.469755	0.433888	0.0358679	FALSE	1.49752	4 vs 3	0.162355	4 vs 2	-0.189189	-0.351544	Faf2:chr13:54660895-54661137:1, Faf2:chr13:54661178-54661747:1, Faf2:chr13:54663296-54663745:1, Faf2:chr13:54663707-54664086:1	Faf2	0.00906045	0.0185762	FALSE	FALSE	0.00415702	0.0203446	FALSE
1054	1.75949e-05	9.14775e-05	0.456349	0.426871	0.0294779	FALSE	0.86406	7 vs 4	0.162287	8 vs 4	-0.200855	-0.363142	Ppp3ca:chr3:136934973-136935366:1, Ppp3ca:chr3:136935172-136935591:1, Ppp3ca:chr3:136935331-136935765:1, Ppp3ca:chr3:136935456-136935860:1, Ppp3ca:chr3:136935791-136936292:1, Ppp3ca:chr3:136936416-136936917:1, Ppp3ca:chr3:136936926-136937591:1, Ppp3ca:chr3:136937364-136937729:1	Ppp3ca	0.000133406	0.000649732	FALSE	FALSE	9.14775e-05	0.000693591	FALSE
1055	0.105866	0.17716	0.407609	0.326562	0.0810462	TRUE	1.0878	3 vs 2	0.162092	3 vs 1	-0.184783	-0.346875	Tiparp:chr3:65553431-65553898:1, Tiparp:chr3:65553853-65554181:1, Tiparp:chr3:65554749-65555189:1	Tiparp	NA	NA	FALSE	FALSE	0.17716	NA	FALSE
1056	0.743673	NA	0.714286	0.711111	0.0031746	TRUE	Inf	1 vs 4	0.161905	3 vs 4	0.428571	0.266667	Epb41l4a:chr18:33796495-33796719:-1, Epb41l4a:chr18:33796716-33796834:-1, Epb41l4a:chr18:33796932-33797293:-1, Epb41l4a:chr18:33797073-33797463:-1	Epb41l4a	NA	NA	FALSE	FALSE	0.743673	NA	FALSE
1057	0.326399	0.508243	0.452778	0.5	-0.0472222	TRUE	-1.20397	3 vs 5	0.161538	5 vs 7	0	-0.161538	Cadm2:chr16:66655416-66655780:-1, Cadm2:chr16:66656184-66656597:-1, Cadm2:chr16:66659310-66659611:-1, Cadm2:chr16:66660032-66660381:-1, Cadm2:chr16:66661019-66661459:-1, Cadm2:chr16:66662353-66662627:-1, Cadm2:chr16:66662175-66662878:-1	Cadm2	NA	NA	FALSE	FALSE	0.508243	NA	FALSE
1058	0.257147	NA	0.744681	0.663934	0.0807464	TRUE	0.389564	1 vs 2	0.161493	1 vs 2	0.489362	0.327869	Scaf4:chr16:90228935-90229292:-1, Scaf4:chr16:90229100-90229521:-1	Scaf4	NA	NA	FALSE	FALSE	0.257147	NA	FALSE
1059	8.39403e-05	0.0190109	0.699191	0.634105	0.0650863	TRUE	3.0053	2 vs 5	0.161369	2 vs 5	0.181132	0.0197628	Ago2:chr15:73095844-73096223:-1, Ago2:chr15:73097005-73097357:-1, Ago2:chr15:73098490-73098725:-1, Ago2:chr15:73098450-73098974:-1, Ago2:chr15:73106066-73106328:-1, Ago2:chr15:73106230-73106540:-1, Ago2:chr15:73106148-73106746:-1, Ago2:chr15:73106622-73106937:-1	Ago2	NA	NA	FALSE	FALSE	0.0190109	NA	FALSE
1060	0.044873	0.0362207	0.904762	0.844444	0.0603175	FALSE	1.57348	1 vs 3	0.16127	1 vs 3	0.730159	0.568889	Qser1:chr2:104754791-104755135:-1, Qser1:chr2:104757565-104757957:-1, Qser1:chr2:104757919-104758326:-1, Qser1:chr2:104757969-104758583:-1	Qser1	0.122183	0.109933	FALSE	FALSE	0.044873	0.144458	FALSE
1061	0.869979	NA	0.8	0.719512	0.0804878	TRUE	0.444251	1 vs 2	0.160976	1 vs 2	0.6	0.439024	Bcl6b:chr11:70224096-70224474:-1, Bcl6b:chr11:70225656-70226036:-1	Bcl6b	NA	NA	FALSE	FALSE	0.869979	NA	FALSE
1062	0.137434	0.208422	0.683453	0.602996	0.080457	FALSE	0.351722	2 vs 1	0.160914	2 vs 1	0.366906	0.205993	Trrap:chr5:144859208-144859685:1, Trrap:chr5:144859469-144859778:1	Trrap	0.280163	0.384462	FALSE	FALSE	0.208422	0.437514	FALSE
1063	0.0836773	0.2032	0.850242	0.786121	0.064121	FALSE	Inf	1 vs 6	0.160904	1 vs 4	0.42029	0.259386	Vps4b:chr1:106771163-106771444:-1, Vps4b:chr1:106771175-106771626:-1, Vps4b:chr1:106771364-106772136:-1, Vps4b:chr1:106771786-106772490:-1, Vps4b:chr1:106772008-106772117:-1, Vps4b:chr1:106772130-106772345:-1, Vps4b:chr1:106772342-106772599:-1	Vps4b	0.194965	0.376191	FALSE	FALSE	0.2032	0.429749	FALSE
1064	0.0821731	0.129899	0.632479	0.54955	0.0829291	TRUE	1.55335	3 vs 5	0.160776	1 vs 6	0.025641	-0.135135	Skida1:chr2:18040230-18040590:-1, Skida1:chr2:18041967-18042351:-1, Skida1:chr2:18042022-18042436:-1, Skida1:chr2:18043954-18044554:-1, Skida1:chr2:18044362-18044849:-1, Skida1:chr2:18044337-18044646:-1, Skida1:chr2:18045005-18045246:-1, Skida1:chr2:18045251-18045466:-1, Skida1:chr2:18045245-18045756:-1, Skida1:chr2:18045591-18045990:-1	Skida1	NA	NA	FALSE	FALSE	0.129899	NA	FALSE
1065	0.240855	0.32755	0.488372	0.408	0.0803721	TRUE	0.325719	1 vs 2	0.160744	1 vs 2	-0.0232558	-0.184	Atg13:chr2:91674582-91674959:-1, Atg13:chr2:91675642-91675923:-1	Atg13	NA	NA	FALSE	FALSE	0.32755	NA	FALSE
1066	0.245105	0.273644	0.392857	0.3125	0.0803571	TRUE	#NAME?	1 vs 2	0.160714	1 vs 3	-0.214286	-0.375	Aldh5a1:chr13:24907572-24907950:-1, Aldh5a1:chr13:24907857-24908164:-1, Aldh5a1:chr13:24911503-24911848:-1	Aldh5a1	NA	NA	FALSE	FALSE	0.273644	NA	FALSE
1067	0.735846	0.836609	0.434483	0.434286	0.000197044	TRUE	1.42712	2 vs 4	0.160591	2 vs 4	0.103448	-0.0571429	Spata1:chr3:146457196-146457493:-1, Spata1:chr3:146457383-146457534:-1, Spata1:chr3:146463044-146463337:-1, Spata1:chr3:146484431-146484670:-1, Spata1:chr3:146485458-146485729:-1, Spata1:chr3:146485369-146485965:-1	Spata1	NA	NA	FALSE	FALSE	0.836609	NA	FALSE
1068	0.00543406	0.00210382	0.542966	0.509846	0.0331196	FALSE	0.998529	3 vs 5	0.160526	3 vs 4	-0.0456274	-0.206154	Gapvd1:chr2:34674591-34674903:-1, Gapvd1:chr2:34676205-34676453:-1, Gapvd1:chr2:34676192-34676728:-1, Gapvd1:chr2:34677000-34677296:-1, Gapvd1:chr2:34676895-34677498:-1, Gapvd1:chr2:34677385-34677956:-1	Gapvd1	0.021874	0.0104845	FALSE	FALSE	0.00543406	0.0255129	FALSE
1069	0.0739476	0.0471665	0.425339	0.345161	0.0801781	FALSE	0.339485	2 vs 1	0.160356	2 vs 1	-0.149321	-0.309677	Ctu2:chr8:122481448-122481573:1, Ctu2:chr8:122481443-122481770:1	Ctu2	0.177866	0.133165	FALSE	FALSE	0.0739476	0.205951	FALSE
1070	0.439517	NA	0.455882	0.414894	0.0409887	TRUE	0.74444	3 vs 2	0.1602	3 vs 2	-0.382353	-0.542553	Zfp612:chr8:110090529-110091164:1, Zfp612:chr8:110092367-110092766:1, Zfp612:chr8:110092157-110092927:1	Zfp612	NA	NA	FALSE	FALSE	0.439517	NA	FALSE
1071	0.178299	NA	0.205882	0.125786	0.0800962	TRUE	0.588815	1 vs 2	0.160192	1 vs 2	-0.588235	-0.748428	Zfp867:chr11:59461255-59461460:-1, Zfp867:chr11:59461752-59462195:-1	Zfp867	NA	NA	FALSE	FALSE	0.178299	NA	FALSE
1072	0.330599	0.280127	0.511765	0.470238	0.0415266	TRUE	0.916291	4 vs 1	0.160131	4 vs 2	-0.117647	-0.277778	Crebzf:chr7:90443796-90444245:1, Crebzf:chr7:90445798-90446113:1, Crebzf:chr7:90446181-90446872:1, Crebzf:chr7:90446464-90446719:1, Crebzf:chr7:90447328-90447723:1	Crebzf	NA	NA	FALSE	FALSE	0.330599	NA	FALSE
1073	0.50177	NA	0.952381	0.872549	0.0798319	TRUE	1.07205	1 vs 2	0.159664	1 vs 2	0.904762	0.745098	Rapgef2:chr3:79062521-79062863:-1, Rapgef2:chr3:79064036-79064318:-1	Rapgef2	NA	NA	FALSE	FALSE	0.50177	NA	FALSE
1074	0.418948	NA	0.181818	0.102041	0.0797774	TRUE	0.670674	2 vs 1	0.159555	2 vs 1	-0.636364	-0.795918	Tmem265:chr7:127564894-127565302:1, Tmem265:chr7:127566642-127566925:1	Tmem265	NA	NA	FALSE	FALSE	0.418948	NA	FALSE
1075	0.637699	0.796625	0.572222	0.538318	0.0339045	TRUE	-1.0116	1 vs 3	0.159138	2 vs 5	-0.0277778	-0.186916	St8sia4:chr1:95587674-95588079:-1, St8sia4:chr1:95618509-95618914:-1, St8sia4:chr1:95618254-95619417:-1, St8sia4:chr1:95619844-95620158:-1, St8sia4:chr1:95627214-95627825:-1, St8sia4:chr1:95627433-95627635:-1	St8sia4	NA	NA	FALSE	FALSE	0.796625	NA	FALSE
1076	0.00812773	0.0050264	0.870968	0.791423	0.0795447	FALSE	1.18784	2 vs 3	0.159089	1 vs 3	0.741935	0.582846	Plekhf2:chr4:10988622-10989017:-1, Plekhf2:chr4:10989355-10990190:-1, Plekhf2:chr4:10990035-10990497:-1	Plekhf2	0.0309048	0.0218193	FALSE	FALSE	0.00812773	0.0361549	FALSE
1077	0.442516	0.37867	0.416667	0.445724	-0.029057	TRUE	-1.22121	5 vs 2	0.158772	2 vs 1	0.0666667	-0.0921053	Zfp189:chr4:49530830-49531601:1, Zfp189:chr4:49531122-49531560:1, Zfp189:chr4:49531256-49531498:1, Zfp189:chr4:49531291-49531715:1, Zfp189:chr4:49533378-49533798:1	Zfp189	NA	NA	FALSE	FALSE	0.442516	NA	FALSE
1078	0.231819	0.242131	0.182456	0.153846	0.02861	TRUE	#NAME?	1 vs 2	0.158637	3 vs 4	-0.463158	-0.621795	Fam160a2:chr7:105371211-105371553:-1, Fam160a2:chr7:105371429-105371567:-1, Fam160a2:chr7:105376294-105376621:-1, Fam160a2:chr7:105378577-105378962:-1	Fam160a2	NA	NA	FALSE	FALSE	0.242131	NA	FALSE
1079	0.00408179	0.00788901	0.417313	0.333333	0.0839793	FALSE	0.431055	1 vs 4	0.158535	1 vs 4	-0.213178	-0.371714	Glg1:chr8:111153288-111153641:-1, Glg1:chr8:111155301-111155695:-1, Glg1:chr8:111156641-111157094:-1, Glg1:chr8:111157523-111157910:-1	Glg1	0.0172222	0.03153	FALSE	FALSE	0.00788901	0.0351545	FALSE
1080	0.635594	0.480268	0.475191	0.44697	0.0282211	TRUE	-1.27046	4 vs 2	0.158223	2 vs 1	-0.114504	-0.272727	Gpc6:chr14:117975010-117975441:1, Gpc6:chr14:117976082-117976514:1, Gpc6:chr14:117976226-117976590:1, Gpc6:chr14:117979016-117979480:1, Gpc6:chr14:117979225-117979529:1	Gpc6	NA	NA	FALSE	FALSE	0.635594	NA	FALSE
1081	0.277373	0.1646	0.308333	0.304878	0.00345528	TRUE	-1.00311	3 vs 2	0.158049	2 vs 1	0.113333	-0.0447154	Cspp1:chr1:10066595-10067114:1, Cspp1:chr1:10066810-10067062:1, Cspp1:chr1:10067388-10068141:1, Cspp1:chr1:10067687-10067948:1, Cspp1:chr1:10136429-10136772:1	Cspp1	NA	NA	FALSE	FALSE	0.277373	NA	FALSE
1082	0.0350042	0.113587	0.653659	0.55102	0.102638	TRUE	1.26567	2 vs 6	0.158039	1 vs 6	0.280488	0.122449	Magt1:chrX:105968084-105968425:-1, Magt1:chrX:105968677-105969091:-1, Magt1:chrX:105969088-105969502:-1, Magt1:chrX:105969313-105969579:-1, Magt1:chrX:105970492-105970826:-1, Magt1:chrX:105970252-105971209:-1	Magt1	NA	NA	FALSE	FALSE	0.113587	NA	FALSE
1083	0.040449	0.113633	0.653017	0.574074	0.0789432	TRUE	0.739727	3 vs 1	0.157886	3 vs 1	0.306034	0.148148	Haus2:chr2:120619371-120619888:1, Haus2:chr2:120620872-120621362:1, Haus2:chr2:120621284-120621541:1	Haus2	NA	NA	FALSE	FALSE	0.113633	NA	FALSE
1084	0.000772133	0.00196755	0.280702	0.297428	-0.0167267	FALSE	-1.07541	4 vs 2	0.157882	2 vs 1	0.321637	0.163755	Stx6:chr1:155202304-155202732:1, Stx6:chr1:155203090-155203589:1, Stx6:chr1:155203485-155203838:1, Stx6:chr1:155205284-155205671:1	Stx6	0.0039303	0.00986627	FALSE	FALSE	0.00196755	0.0106786	FALSE
1085	8.04936e-06	2.97384e-05	0.493945	0.415036	0.0789082	FALSE	0.318961	1 vs 2	0.157816	1 vs 2	-0.0121107	-0.169927	Wtap:chr17:12966778-12967156:-1, Wtap:chr17:12974254-12974625:-1	Wtap	6.40921e-05	0.000234613	FALSE	FALSE	2.97384e-05	0.000250117	FALSE
1086	0.43883	NA	0.171429	0.0925926	0.078836	TRUE	0.706846	1 vs 2	0.157672	1 vs 2	-0.657143	-0.814815	Iho1:chr9:108403410-108403945:-1, Iho1:chr9:108403997-108404176:-1	Iho1	NA	NA	FALSE	FALSE	0.43883	NA	FALSE
1087	2.93397e-05	4.15569e-05	0.518519	0.445682	0.0728368	TRUE	Inf	1 vs 8	0.157519	2 vs 5	0.0595238	-0.0979955	Zfp451:chr1:33761476-33761915:-1, Zfp451:chr1:33761680-33762227:-1, Zfp451:chr1:33792090-33792482:-1, Zfp451:chr1:33796577-33796896:-1, Zfp451:chr1:33797666-33798043:-1, Zfp451:chr1:33798718-33799011:-1, Zfp451:chr1:33799537-33800088:-1, Zfp451:chr1:33800014-33800199:-1, Zfp451:chr1:33800932-33801550:-1, Zfp451:chr1:33801445-33801875:-1	Zfp451	NA	NA	FALSE	FALSE	4.15569e-05	NA	FALSE
1088	0.179709	NA	0.176471	0.15	0.0264706	TRUE	-1.48808	1 vs 2	0.157289	2 vs 3	-0.647059	-0.804348	Gabra2:chr5:70958361-70958684:-1, Gabra2:chr5:70958381-70958917:-1, Gabra2:chr5:70959518-70959907:-1	Gabra2	NA	NA	FALSE	FALSE	0.179709	NA	FALSE
1089	0.186121	0.290652	0.905405	0.826772	0.0786338	TRUE	0.695865	1 vs 2	0.157268	1 vs 2	0.810811	0.653543	Mlst8:chr17:24473548-24473889:-1, Mlst8:chr17:24475286-24475646:-1	Mlst8	NA	NA	FALSE	FALSE	0.290652	NA	FALSE
1090	0.638949	NA	0.818182	0.739726	0.0784558	TRUE	0.459532	2 vs 1	0.156912	2 vs 1	0.636364	0.479452	Gadd45b:chr10:80931394-80931705:1, Gadd45b:chr10:80931823-80932204:1	Gadd45b	NA	NA	FALSE	FALSE	0.638949	NA	FALSE
1091	0.616342	0.787769	0.612903	0.601307	0.011596	TRUE	1.09861	2 vs 1	0.156863	2 vs 1	0	-0.156863	D2hgdh:chr1:93850947-93851405:1, D2hgdh:chr1:93851637-93852025:1, D2hgdh:chr1:93851718-93852361:1, D2hgdh:chr1:93852054-93852285:1	D2hgdh	NA	NA	FALSE	FALSE	0.787769	NA	FALSE
1092	0.00342501	0.0365883	0.217007	0.171965	0.0450421	FALSE	#NAME?	6 vs 1	0.156427	4 vs 1	-0.244898	-0.401325	Pten:chr19:32819790-32820016:1, Pten:chr19:32819653-32820515:1, Pten:chr19:32821673-32821971:1, Pten:chr19:32823010-32823323:1, Pten:chr19:32825451-32825708:1, Pten:chr19:32825561-32826158:1, Pten:chr19:32825835-32826160:1	Pten	0.0148203	0.110887	FALSE	FALSE	0.0365883	0.122929	FALSE
1093	0.602884	NA	0.75	0.729508	0.0204918	TRUE	Inf	1 vs 3	0.155738	2 vs 3	0.5	0.344262	Lpin1:chr12:16535921-16536348:-1, Lpin1:chr12:16537052-16537390:-1, Lpin1:chr12:16537079-16537703:-1	Lpin1	NA	NA	FALSE	FALSE	0.602884	NA	FALSE
1094	0.0657206	0.219508	0.645688	0.56479	0.0808977	TRUE	0.681313	4 vs 1	0.15559	4 vs 1	0.195804	0.0402145	Pacc1:chr1:191349921-191350154:1, Pacc1:chr1:191349677-191350475:1, Pacc1:chr1:191350504-191350988:1, Pacc1:chr1:191350901-191351284:1	Pacc1	NA	NA	FALSE	FALSE	0.219508	NA	FALSE
1095	0.677625	NA	0.882353	0.804598	0.0777552	TRUE	0.599621	2 vs 1	0.15551	2 vs 1	0.764706	0.609195	Nt5dc3:chr10:86835926-86836572:1, Nt5dc3:chr10:86838036-86838389:1	Nt5dc3	NA	NA	FALSE	FALSE	0.677625	NA	FALSE
1096	0.0812918	0.3376	0.599715	0.548942	0.0507733	TRUE	0.631462	2 vs 3	0.155372	2 vs 3	0.175214	0.0198413	Tab2:chr10:7905648-7905970:-1, Tab2:chr10:7905674-7906132:-1, Tab2:chr10:7906011-7906718:-1, Tab2:chr10:7906305-7906522:-1	Tab2	NA	NA	FALSE	FALSE	0.3376	NA	FALSE
1097	0.0511713	0.250151	0.368771	0.291262	0.0775086	FALSE	0.351768	1 vs 2	0.155017	1 vs 2	-0.262458	-0.417476	Ccar1:chr10:62743872-62744352:-1, Ccar1:chr10:62744432-62744864:-1	Ccar1	0.135489	0.43556	FALSE	FALSE	0.250151	0.497169	FALSE
1098	0.404999	0.564668	0.526316	0.451923	0.0743927	TRUE	1.67398	3 vs 1	0.154858	2 vs 1	0.789474	0.634615	Arrb1:chr7:99606177-99606771:1, Arrb1:chr7:99606434-99606771:1, Arrb1:chr7:99606563-99606771:1	Arrb1	NA	NA	FALSE	FALSE	0.564668	NA	FALSE
1099	0.655832	NA	0.677419	0.6	0.0774194	TRUE	0.336472	2 vs 1	0.154839	2 vs 1	0.354839	0.2	Zcchc4:chr5:52824144-52824555:1, Zcchc4:chr5:52824350-52824668:1	Zcchc4	NA	NA	FALSE	FALSE	0.655832	NA	FALSE
1100	0.0796602	0.111454	0.457547	0.408163	0.0493839	FALSE	0.632523	1 vs 3	0.154794	2 vs 3	0.603774	0.44898	Arglu1:chr8:8665072-8665404:-1, Arglu1:chr8:8666562-8666917:-1, Arglu1:chr8:8667250-8667485:-1	Arglu1	0.188045	0.251062	FALSE	FALSE	0.111454	0.281405	FALSE
1101	0.702809	NA	0.611111	0.596552	0.0145594	TRUE	0.623621	2 vs 3	0.154789	2 vs 3	0.444444	0.289655	Klhl29:chr12:5077142-5077540:-1, Klhl29:chr12:5079091-5079388:-1, Klhl29:chr12:5079086-5079547:-1	Klhl29	NA	NA	FALSE	FALSE	0.702809	NA	FALSE
1102	0.249486	0.195038	0.70202	0.663743	0.0382775	TRUE	0.946144	2 vs 1	0.154705	5 vs 3	0.242424	0.0877193	Pcyt1a:chr16:32471185-32472190:1, Pcyt1a:chr16:32471538-32471969:1, Pcyt1a:chr16:32471722-32471981:1, Pcyt1a:chr16:32474186-32474889:1, Pcyt1a:chr16:32474650-32475128:1	Pcyt1a	NA	NA	FALSE	FALSE	0.249486	NA	FALSE
1103	0.0309709	0.0263524	0.201515	0.195652	0.00586298	FALSE	-0.780159	1 vs 4	0.154651	4 vs 5	-0.269697	-0.424348	Ccny:chr18:9312279-9312673:-1, Ccny:chr18:9313940-9314452:-1, Ccny:chr18:9314343-9314775:-1, Ccny:chr18:9315240-9315710:-1, Ccny:chr18:9315913-9316300:-1	Ccny	0.0910488	0.0871932	FALSE	FALSE	0.0309709	0.107614	FALSE
1104	0.625409	0.794661	0.278867	0.255639	0.023228	TRUE	#NAME?	3 vs 1	0.154602	2 vs 1	0.0718954	-0.0827068	Efcab14:chr4:115773778-115774027:1, Efcab14:chr4:115773740-115774466:1, Efcab14:chr4:115775282-115775446:1, Efcab14:chr4:115775328-115776017:1, Efcab14:chr4:115775615-115775865:1, Efcab14:chr4:115776807-115777333:1, Efcab14:chr4:115777004-115777336:1	Efcab14	NA	NA	FALSE	FALSE	0.794661	NA	FALSE
1105	0.0490775	NA	0.881818	0.85	0.0318182	TRUE	-1.79176	2 vs 1	0.154545	3 vs 2	0.854545	0.7	Zdhhc2:chr8:40483656-40483897:1, Zdhhc2:chr8:40483667-40484171:1, Zdhhc2:chr8:40485320-40485756:1	Zdhhc2	NA	NA	FALSE	FALSE	0.0490775	NA	FALSE
1106	0.253234	0.349263	0.813433	0.736301	0.0771315	TRUE	0.985284	1 vs 3	0.154263	1 vs 3	0.626866	0.472603	Rnf111:chr9:70425400-70425783:-1, Rnf111:chr9:70425767-70426304:-1, Rnf111:chr9:70425951-70426563:-1	Rnf111	NA	NA	FALSE	FALSE	0.349263	NA	FALSE
1107	6.99978e-07	2.47265e-05	0.234774	0.15217	0.0826042	FALSE	1.68948	9 vs 3	0.154231	8 vs 1	-0.435185	-0.589416	Wdr33:chr18:31833677-31834194:1, Wdr33:chr18:31834168-31834537:1, Wdr33:chr18:31834777-31835442:1, Wdr33:chr18:31835083-31835431:1, Wdr33:chr18:31835326-31835532:1, Wdr33:chr18:31841579-31841938:1, Wdr33:chr18:31906771-31907425:1, Wdr33:chr18:31906967-31907400:1, Wdr33:chr18:31907273-31907709:1, Wdr33:chr18:31907489-31907977:1	Wdr33	6.51262e-06	0.000196353	FALSE	FALSE	2.47265e-05	0.000210756	FALSE
1108	0.228424	0.352632	0.476562	0.52911	-0.0525471	TRUE	-1.23969	5 vs 2	0.15411	4 vs 3	0.25	0.0958904	Hif1an:chr19:44571033-44571503:1, Hif1an:chr19:44571377-44572074:1, Hif1an:chr19:44572562-44572910:1, Hif1an:chr19:44575903-44576318:1, Hif1an:chr19:44579908-44580358:1	Hif1an	NA	NA	FALSE	FALSE	0.352632	NA	FALSE
1109	0.0357224	0.0724174	0.828829	0.77208	0.0567491	TRUE	Inf	2 vs 1	0.153846	2 vs 1	0	-0.153846	Casp9:chr4:141813917-141814353:1, Casp9:chr4:141814327-141814572:1, Casp9:chr4:141815486-141815991:1, Casp9:chr4:141815672-141815991:1	Casp9	NA	NA	FALSE	FALSE	0.0724174	NA	FALSE
1110	1	NA	0.0769231	0	0.0769231	TRUE	Inf	1 vs 2	0.153846	1 vs 2	-0.846154	-1	Dnai4:chr4:103038024-103038219:-1, Dnai4:chr4:103038042-103038475:-1	Dnai4	NA	NA	FALSE	FALSE	1	NA	FALSE
1111	0.926418	NA	0.5	0.423077	0.0769231	TRUE	0.310155	1 vs 2	0.153846	1 vs 2	0	-0.153846	Fastkd1:chr2:69686820-69687088:-1, Fastkd1:chr2:69686948-69687183:-1	Fastkd1	NA	NA	FALSE	FALSE	0.926418	NA	FALSE
1112	0.280093	0.371419	0.849359	0.773504	0.0758547	TRUE	0.856472	4 vs 1	0.153846	4 vs 1	0.653846	0.5	Kat6a:chr8:22940362-22940748:1, Kat6a:chr8:22942496-22943304:1, Kat6a:chr8:22942868-22943102:1, Kat6a:chr8:22942928-22943270:1	Kat6a	NA	NA	FALSE	FALSE	0.371419	NA	FALSE
1113	1	NA	0.5	0.423077	0.0769231	TRUE	0.310155	2 vs 1	0.153846	2 vs 1	0	-0.153846	Luzp2:chr7:55267823-55268355:1, Luzp2:chr7:55268335-55268962:1	Luzp2	NA	NA	FALSE	FALSE	1	NA	FALSE
1114	1	NA	0.0769231	0	0.0769231	TRUE	Inf	2 vs 1	0.153846	2 vs 1	-0.846154	-1	Map3k20:chr2:72407122-72407504:1, Map3k20:chr2:72442272-72442619:1	Map3k20	NA	NA	FALSE	FALSE	1	NA	FALSE
1115	0.171402	NA	0.515152	0.486486	0.028665	TRUE	0.899761	3 vs 1	0.153657	3 vs 1	-0.251748	-0.405405	Pkd2:chr5:104504062-104504494:1, Pkd2:chr5:104505135-104505275:1, Pkd2:chr5:104505324-104505769:1, Pkd2:chr5:104505495-104505834:1	Pkd2	NA	NA	FALSE	FALSE	0.171402	NA	FALSE
1116	0.689938	0.732966	0.666389	0.605263	0.0611262	TRUE	0.595983	1 vs 3	0.153341	1 vs 2	-0.109817	-0.263158	Lpar1:chr4:58435212-58435630:-1, Lpar1:chr4:58436407-58436798:-1, Lpar1:chr4:58436730-58437548:-1	Lpar1	NA	NA	FALSE	FALSE	0.732966	NA	FALSE
1117	5.03846e-06	5.16573e-05	0.306624	0.300926	0.00569801	FALSE	0.96096	1 vs 2	0.153312	1 vs 2	0.0304487	-0.122863	Glod4:chr11:76210514-76210966:-1, Glod4:chr11:76220697-76221033:-1, Glod4:chr11:76221503-76221889:-1, Glod4:chr11:76221729-76222084:-1	Glod4	4.16191e-05	0.000390981	FALSE	FALSE	5.16573e-05	0.0004192	FALSE
1118	0.167036	0.0632805	0.376404	0.3319	0.0445049	TRUE	-0.725937	4 vs 5	0.153256	3 vs 6	-0.0617978	-0.215054	Satb1:chr17:51736135-51736546:-1, Satb1:chr17:51736456-51737127:-1, Satb1:chr17:51738629-51739002:-1, Satb1:chr17:51738803-51739272:-1, Satb1:chr17:51739231-51740008:-1, Satb1:chr17:51739486-51739774:-1	Satb1	NA	NA	FALSE	FALSE	0.167036	NA	FALSE
1119	0.0134728	0.0627687	0.436426	0.34809	0.0883358	FALSE	0.805483	3 vs 2	0.153163	4 vs 1	-0.120275	-0.273438	Nup50:chr15:84939640-84940049:1, Nup50:chr15:84940159-84940616:1, Nup50:chr15:84941933-84942571:1, Nup50:chr15:84942548-84942963:1	Nup50	0.0468781	0.162943	FALSE	FALSE	0.0627687	0.18389	FALSE
1120	0.190128	NA	0.163793	0.0872642	0.076529	TRUE	0.831984	1 vs 3	0.153058	1 vs 3	-0.672414	-0.825472	Hgsnat:chr8:25942471-25942776:-1, Hgsnat:chr8:25944455-25944706:-1, Hgsnat:chr8:25944566-25945045:-1	Hgsnat	NA	NA	FALSE	FALSE	0.190128	NA	FALSE
1121	0.441173	0.415274	0.641975	0.598039	0.0439361	TRUE	0.995428	2 vs 4	0.15305	2 vs 4	0.814815	0.661765	Mob3a:chr10:80684566-80685117:-1, Mob3a:chr10:80685179-80685641:-1, Mob3a:chr10:80685887-80686504:-1, Mob3a:chr10:80686381-80687005:-1	Mob3a	NA	NA	FALSE	FALSE	0.441173	NA	FALSE
1122	2.69767e-20	0.0050269	0.552395	0.475872	0.0765225	FALSE	0.306937	2 vs 1	0.153045	2 vs 1	0.104789	-0.0482556	Serbp1:chr6:67283869-67283992:1, Serbp1:chr6:67283874-67284409:1	Serbp1	8.15723e-19	0.0218193	FALSE	FALSE	0.0050269	0.0240912	FALSE
1123	0.0524519	0.109857	0.575123	0.498619	0.0765044	FALSE	0.39072	2 vs 3	0.153009	1 vs 3	0.150246	-0.00276243	Btg2:chr1:134075308-134075655:-1, Btg2:chr1:134076830-134077251:-1, Btg2:chr1:134077182-134077571:-1	Btg2	0.138347	0.248203	FALSE	FALSE	0.109857	0.27848	FALSE
1124	0.856521	NA	0.591549	0.571429	0.0201207	TRUE	0.510826	3 vs 2	0.152918	3 vs 2	0.295775	0.142857	Tifa:chr3:127797442-127798064:1, Tifa:chr3:127797856-127798376:1, Tifa:chr3:127798065-127798394:1	Tifa	NA	NA	FALSE	FALSE	0.856521	NA	FALSE
1125	0.224745	0.186437	0.451327	0.375	0.0763274	TRUE	0.856867	3 vs 2	0.152655	3 vs 1	-0.0973451	-0.25	Glcci1:chr6:8593304-8593699:1, Glcci1:chr6:8596962-8597425:1, Glcci1:chr6:8597186-8597549:1	Glcci1	NA	NA	FALSE	FALSE	0.224745	NA	FALSE
1126	0.0925176	0.117509	0.891429	0.815126	0.0763025	TRUE	0.621749	2 vs 1	0.152605	2 vs 1	0.782857	0.630252	Rnft1:chr11:86495684-86496541:1, Rnft1:chr11:86496174-86496547:1	Rnft1	NA	NA	FALSE	FALSE	0.117509	NA	FALSE
1127	0.296342	NA	0.160714	0.084507	0.0762072	TRUE	0.729705	1 vs 2	0.152414	1 vs 2	-0.678571	-0.830986	Spef1:chr2:131170265-131170761:-1, Spef1:chr2:131170999-131171378:-1	Spef1	NA	NA	FALSE	FALSE	0.296342	NA	FALSE
1128	0.0468144	0.061999	0.784483	0.728829	0.0556539	FALSE	0.862973	3 vs 1	0.152392	3 vs 2	0.206897	0.0545045	Cdk5r1:chr11:80478103-80478511:1, Cdk5r1:chr11:80480192-80480511:1, Cdk5r1:chr11:80480836-80481182:1	Cdk5r1	0.125979	0.161464	FALSE	FALSE	0.061999	0.182477	FALSE
1129	0.754969	NA	0.333333	0.257143	0.0761905	TRUE	0.367725	2 vs 1	0.152381	2 vs 1	-0.333333	-0.485714	Pcdhb17:chr18:37487923-37488294:1, Pcdhb17:chr18:37489078-37489444:1	Pcdhb17	NA	NA	FALSE	FALSE	0.754969	NA	FALSE
1130	0.109159	0.129219	0.394667	0.430303	-0.0356364	TRUE	-1.99243	6 vs 5	0.152323	5 vs 4	-0.08	-0.232323	Cand2:chr6:115803560-115803889:1, Cand2:chr6:115804062-115804443:1, Cand2:chr6:115804536-115804917:1, Cand2:chr6:115804755-115805557:1, Cand2:chr6:115805218-115805499:1, Cand2:chr6:115805251-115805557:1	Cand2	NA	NA	FALSE	FALSE	0.129219	NA	FALSE
1131	0.26346	0.398174	0.392628	0.321608	0.0710202	TRUE	0.719958	1 vs 2	0.152252	1 vs 4	-0.144231	-0.296482	Tor1aip1:chr1:156004543-156005050:-1, Tor1aip1:chr1:156005676-156006020:-1, Tor1aip1:chr1:156006221-156006444:-1, Tor1aip1:chr1:156006752-156007154:-1	Tor1aip1	NA	NA	FALSE	FALSE	0.398174	NA	FALSE
1132	0.503198	NA	0.25	0.173913	0.076087	TRUE	0.459532	2 vs 1	0.152174	2 vs 1	-0.5	-0.652174	Gm10130:chr2:150326606-150327009:1, Gm10130:chr2:150328611-150329040:1	Gm10130	NA	NA	FALSE	FALSE	0.503198	NA	FALSE
1133	0.725769	0.644337	0.59375	0.581081	0.0126689	TRUE	-0.405465	2 vs 3	0.152027	1 vs 2	0.125	-0.027027	Ybey:chr10:76459838-76460509:-1, Ybey:chr10:76461190-76461513:-1, Ybey:chr10:76462161-76462493:-1	Ybey	NA	NA	FALSE	FALSE	0.725769	NA	FALSE
1134	0.00572889	0.000659532	0.19699	0.167715	0.0292755	FALSE	-0.532566	3 vs 2	0.152016	2 vs 1	-0.372093	-0.524109	Carnmt1:chr19:18703938-18704321:1, Carnmt1:chr19:18704371-18704835:1, Carnmt1:chr19:18705808-18706172:1	Carnmt1	0.0228185	0.00368061	FALSE	FALSE	0.00572889	0.0266998	FALSE
1135	0.237266	NA	0.918033	0.842105	0.0759275	TRUE	0.741937	1 vs 2	0.151855	1 vs 2	0.836066	0.684211	Smug1:chr15:103153290-103153688:-1, Smug1:chr15:103155189-103155389:-1	Smug1	NA	NA	FALSE	FALSE	0.237266	NA	FALSE
1136	0.0937943	0.177928	0.497326	0.475177	0.0221489	FALSE	-1.52326	1 vs 2	0.151752	2 vs 3	0.529412	0.37766	Ggnbp2:chr11:84832081-84832260:-1, Ggnbp2:chr11:84832555-84832920:-1, Ggnbp2:chr11:84832372-84833392:-1, Ggnbp2:chr11:84832984-84833271:-1	Ggnbp2	0.212562	0.344041	FALSE	FALSE	0.177928	0.390275	FALSE
1137	0.836028	NA	0.636364	0.560606	0.0757576	TRUE	0.530628	1 vs 3	0.151515	1 vs 3	0.272727	0.121212	Eps8:chr6:137477670-137478010:-1, Eps8:chr6:137478079-137478438:-1, Eps8:chr6:137478304-137479068:-1	Eps8	NA	NA	FALSE	FALSE	0.836028	NA	FALSE
1138	0.803165	NA	0.409091	0.333333	0.0757576	TRUE	0.325422	2 vs 1	0.151515	2 vs 1	-0.181818	-0.333333	Rnf168:chr16:32300387-32301000:1, Rnf168:chr16:32301005-32301439:1	Rnf168	NA	NA	FALSE	FALSE	0.803165	NA	FALSE
1139	0.0629619	0.0489592	0.602273	0.59965	0.00262238	FALSE	-0.773041	1 vs 4	0.150932	2 vs 3	0.356061	0.205128	Cdip1:chr16:4765455-4765871:-1, Cdip1:chr16:4766804-4767209:-1, Cdip1:chr16:4767279-4767706:-1, Cdip1:chr16:4767753-4768065:-1, Cdip1:chr16:4768040-4768279:-1	Cdip1	0.15893	0.136612	FALSE	FALSE	0.0629619	0.184197	FALSE
1140	0.0240501	0.02967	0.306569	0.27907	0.0274996	FALSE	-0.723117	4 vs 2	0.150544	3 vs 1	-0.284672	-0.435216	Srfbp1:chr18:52490373-52490876:1, Srfbp1:chr18:52490786-52491189:1, Srfbp1:chr18:52490816-52491297:1, Srfbp1:chr18:52491421-52491944:1	Srfbp1	0.0747701	0.0943776	FALSE	FALSE	0.02967	0.10416	FALSE
1141	0.269013	0.442628	0.245283	0.170213	0.0750703	TRUE	0.46019	2 vs 1	0.150141	2 vs 1	-0.509434	-0.659574	Mblac2:chr13:81750142-81750483:1, Mblac2:chr13:81752998-81753217:1	Mblac2	NA	NA	FALSE	FALSE	0.442628	NA	FALSE
1142	1	NA	0.7	0.625	0.075	TRUE	0.336472	1 vs 2	0.15	1 vs 2	0.4	0.25	Fcer1g:chr1:171229572-171229843:-1, Fcer1g:chr1:171229572-171230021:-1	Fcer1g	NA	NA	FALSE	FALSE	1	NA	FALSE
1143	0.787438	NA	0.708333	0.633333	0.075	TRUE	0.693147	1 vs 3	0.15	1 vs 2	0.0833333	-0.0666667	Nfkbiz:chr16:55811370-55811756:-1, Nfkbiz:chr16:55812438-55812752:-1, Nfkbiz:chr16:55812609-55812807:-1	Nfkbiz	NA	NA	FALSE	FALSE	0.787438	NA	FALSE
1144	0.486674	NA	0.275	0.2	0.075	TRUE	0.416894	2 vs 1	0.15	2 vs 1	-0.45	-0.6	Zfp865:chr7:5032882-5033235:1, Zfp865:chr7:5036444-5036759:1	Zfp865	NA	NA	FALSE	FALSE	0.486674	NA	FALSE
1145	0.24808	0.383945	0.888337	0.869403	0.0189345	TRUE	-1.03407	2 vs 5	0.149883	1 vs 2	0.746898	0.597015	Lbr:chr1:181815283-181815716:-1, Lbr:chr1:181816100-181816452:-1, Lbr:chr1:181815996-181816732:-1, Lbr:chr1:181816561-181816804:-1, Lbr:chr1:181816632-181816958:-1	Lbr	NA	NA	FALSE	FALSE	0.383945	NA	FALSE
1146	0.282204	0.161932	0.642857	0.616743	0.0261137	TRUE	1.77822	4 vs 3	0.14977	4 vs 3	0.571429	0.421659	Lbh:chr17:72939226-72939346:1, Lbh:chr17:72939217-72939598:1, Lbh:chr17:72939543-72939924:1, Lbh:chr17:72941648-72941955:1	Lbh	NA	NA	FALSE	FALSE	0.282204	NA	FALSE
1147	0.537747	0.611871	0.606723	0.578188	0.0285343	TRUE	#NAME?	4 vs 1	0.149712	7 vs 2	0.0235294	-0.126183	Daam1:chr12:71989687-71990335:1, Daam1:chr12:71989947-71990240:1, Daam1:chr12:71990363-71991292:1, Daam1:chr12:71990685-71991023:1, Daam1:chr12:71990937-71991038:1, Daam1:chr12:71990827-71991028:1, Daam1:chr12:71991754-71992398:1, Daam1:chr12:71992029-71992312:1	Daam1	NA	NA	FALSE	FALSE	0.611871	NA	FALSE
1148	0.491458	0.699959	0.717262	0.685764	0.031498	TRUE	0.952009	6 vs 4	0.149554	5 vs 4	-0.0535714	-0.203125	Etnk1:chr6:143203993-143204616:1, Etnk1:chr6:143204536-143204990:1, Etnk1:chr6:143204616-143205259:1, Etnk1:chr6:143204790-143205077:1, Etnk1:chr6:143205932-143206712:1, Etnk1:chr6:143208019-143208402:1, Etnk1:chr6:143208185-143208563:1	Etnk1	NA	NA	FALSE	FALSE	0.699959	NA	FALSE
1149	0.594171	0.579993	0.533333	0.52484	0.00849359	TRUE	1.38629	7 vs 2	0.149551	3 vs 2	0.346667	0.197115	Synrg:chr11:84040730-84041018:1, Synrg:chr11:84041151-84041368:1, Synrg:chr11:84041240-84042382:1, Synrg:chr11:84043871-84044276:1, Synrg:chr11:84044146-84044372:1, Synrg:chr11:84044227-84044575:1, Synrg:chr11:84044377-84044606:1	Synrg	NA	NA	FALSE	FALSE	0.594171	NA	FALSE
1150	1	NA	1	0.925234	0.0747664	TRUE	Inf	2 vs 1	0.149533	2 vs 1	1	0.850467	Nfe2l3:chr6:51456504-51456890:1, Nfe2l3:chr6:51458381-51458772:1	Nfe2l3	NA	NA	FALSE	FALSE	1	NA	FALSE
1151	0.129721	0.34604	0.466	0.453237	0.0127626	TRUE	-0.97456	4 vs 3	0.149487	3 vs 2	0.008	-0.141487	Exog:chr9:119463450-119463711:1, Exog:chr9:119463280-119464028:1, Exog:chr9:119463918-119464252:1, Exog:chr9:119464248-119464617:1, Exog:chr9:119465134-119465559:1	Exog	NA	NA	FALSE	FALSE	0.34604	NA	FALSE
1152	0.00213313	0.0497514	0.454137	0.400332	0.0538045	FALSE	0.562292	3 vs 2	0.149269	3 vs 2	0.170863	0.0215947	Opa3:chr7:19246368-19246579:1, Opa3:chr7:19246579-19246806:1, Opa3:chr7:19247466-19247910:1	Opa3	0.00983329	0.137241	FALSE	FALSE	0.0497514	0.154674	FALSE
1153	0.441404	0.65946	0.38961	0.315	0.0746104	TRUE	0.393431	1 vs 3	0.149221	1 vs 3	-0.220779	-0.37	Rmnd5a:chr6:71388634-71388906:-1, Rmnd5a:chr6:71388657-71389017:-1, Rmnd5a:chr6:71388843-71389240:-1	Rmnd5a	NA	NA	FALSE	FALSE	0.65946	NA	FALSE
1154	0.0885529	0.221971	0.852349	0.777778	0.0745712	FALSE	0.500382	1 vs 2	0.149142	1 vs 2	0.704698	0.555556	Paip2b:chr6:83806032-83806412:-1, Paip2b:chr6:83808270-83809391:-1	Paip2b	0.203367	0.402105	FALSE	FALSE	0.221971	0.457636	FALSE
1155	0.311703	0.496697	0.318066	0.316151	0.00191496	FALSE	-0.5187	2 vs 3	0.14913	3 vs 4	0.427481	0.278351	Pex3:chr10:13523060-13523307:-1, Pex3:chr10:13523821-13524660:-1, Pex3:chr10:13524112-13524481:-1, Pex3:chr10:13524793-13525040:-1	Pex3	0.500143	0.667592	FALSE	FALSE	0.496697	0.740817	FALSE
1156	4.79326e-05	0.000103266	0.63142	0.619383	0.0120374	FALSE	0.418959	2 vs 3	0.148838	2 vs 3	0.392749	0.243911	Ywhaz:chr15:36770230-36770641:-1, Ywhaz:chr15:36770716-36771146:-1, Ywhaz:chr15:36771576-36772040:-1, Ywhaz:chr15:36771890-36772083:-1, Ywhaz:chr15:36771804-36772579:-1	Ywhaz	0.000330839	0.00072078	FALSE	FALSE	0.000103266	0.000771459	FALSE
1157	0.21435	0.410605	0.473333	0.471591	0.00174242	TRUE	-0.789539	1 vs 2	0.148333	2 vs 3	-0.226667	-0.375	Tet1:chr10:62804570-62804902:-1, Tet1:chr10:62811612-62812110:-1, Tet1:chr10:62812379-62812688:-1	Tet1	NA	NA	FALSE	FALSE	0.410605	NA	FALSE
1158	0.455422	0.701046	0.539062	0.513216	0.0258466	TRUE	0.417636	1 vs 2	0.148197	1 vs 2	0.046875	-0.101322	Ppp2r3a:chr9:101104872-101105800:-1, Ppp2r3a:chr9:101105290-101105600:-1, Ppp2r3a:chr9:101106750-101107130:-1	Ppp2r3a	NA	NA	FALSE	FALSE	0.701046	NA	FALSE
1159	0.291516	NA	1	0.925926	0.0740741	TRUE	Inf	1 vs 2	0.148148	1 vs 2	1	0.851852	Cxcr4:chr1:128588199-128588460:-1, Cxcr4:chr1:128588821-128588965:-1	Cxcr4	NA	NA	FALSE	FALSE	0.291516	NA	FALSE
1160	0.761141	NA	1	0.925926	0.0740741	TRUE	Inf	1 vs 2	0.148148	1 vs 2	1	0.851852	Fam13b:chr18:34442345-34442723:-1, Fam13b:chr18:34442636-34442808:-1	Fam13b	NA	NA	FALSE	FALSE	0.761141	NA	FALSE
1161	0.675836	NA	0.571429	0.547445	0.0239833	TRUE	0.654926	2 vs 1	0.148071	2 vs 1	0.571429	0.423358	Gmip:chr8:69818613-69818965:1, Gmip:chr8:69821037-69821796:1, Gmip:chr8:69821566-69821869:1	Gmip	NA	NA	FALSE	FALSE	0.675836	NA	FALSE
1162	0.0964484	0.0515639	0.561303	0.551724	0.00957854	FALSE	-0.96021	1 vs 2	0.147989	2 vs 3	0.626437	0.478448	Mdm4:chr1:132983109-132983436:-1, Mdm4:chr1:132986182-132986559:-1, Mdm4:chr1:132991242-132991703:-1, Mdm4:chr1:132991476-132992195:-1	Mdm4	0.216604	0.140639	FALSE	FALSE	0.0964484	0.254128	FALSE
1163	0.390867	0.39633	0.639785	0.603922	0.0358634	TRUE	1.20397	1 vs 3	0.147818	1 vs 3	0.241935	0.0941176	Clcn5:chrX:7153810-7154159:-1, Clcn5:chrX:7154182-7154579:-1, Clcn5:chrX:7155171-7155460:-1, Clcn5:chrX:7159362-7159933:-1	Clcn5	NA	NA	FALSE	FALSE	0.39633	NA	FALSE
1164	0.347714	0.48985	0.616667	0.595745	0.020922	TRUE	2.07944	3 vs 4	0.147801	2 vs 4	0.573333	0.425532	Adam17:chr12:21323509-21324137:-1, Adam17:chr12:21323738-21324130:-1, Adam17:chr12:21323582-21324347:-1, Adam17:chr12:21324168-21324446:-1, Adam17:chr12:21324618-21324963:-1	Adam17	NA	NA	FALSE	FALSE	0.48985	NA	FALSE
1165	0.670316	0.819187	0.633333	0.571429	0.0619048	TRUE	0.587787	2 vs 1	0.147619	2 vs 1	0.233333	0.0857143	Snx30:chr4:59901581-59901765:1, Snx30:chr4:59904064-59904531:1, Snx30:chr4:59904371-59904740:1	Snx30	NA	NA	FALSE	FALSE	0.819187	NA	FALSE
1166	0.00137264	0.000756273	0.793945	0.744978	0.0489676	FALSE	1.78627	3 vs 1	0.147321	3 vs 2	0.1875	0.0401786	Cdk16:chrX:20698429-20698561:1, Cdk16:chrX:20698549-20698902:1, Cdk16:chrX:20699497-20699905:1	Cdk16	0.00662833	0.00417242	FALSE	FALSE	0.00137264	0.00769648	FALSE
1167	0.705587	0.86951	0.372727	0.332	0.0407273	TRUE	1.15577	3 vs 4	0.147273	3 vs 6	-0.272727	-0.42	Fbxl17:chr17:63045969-63046289:-1, Fbxl17:chr17:63052346-63052662:-1, Fbxl17:chr17:63053906-63054173:-1, Fbxl17:chr17:63057503-63057796:-1, Fbxl17:chr17:63057808-63058046:-1, Fbxl17:chr17:63059428-63059825:-1	Fbxl17	NA	NA	FALSE	FALSE	0.86951	NA	FALSE
1168	0.168757	NA	0.859326	0.785714	0.0736114	TRUE	0.510418	2 vs 1	0.147223	2 vs 1	0.718651	0.571429	Pclaf:chr9:65901504-65901764:1, Pclaf:chr9:65901627-65902161:1	Pclaf	NA	NA	FALSE	FALSE	0.168757	NA	FALSE
1169	0.114838	0.11774	0.493697	0.438395	0.0553024	FALSE	Inf	1 vs 11	0.147221	3 vs 12	-0.189076	-0.336296	Ggps1:chr13:14050663-14050979:-1, Ggps1:chr13:14050572-14051317:-1, Ggps1:chr13:14051645-14051971:-1, Ggps1:chr13:14051430-14052526:-1, Ggps1:chr13:14051976-14052249:-1, Ggps1:chr13:14052224-14052462:-1, Ggps1:chr13:14052455-14052769:-1, Ggps1:chr13:14052615-14053016:-1, Ggps1:chr13:14052821-14053013:-1, Ggps1:chr13:14052890-14053397:-1, Ggps1:chr13:14053340-14053588:-1, Ggps1:chr13:14053703-1405…	Ggps1	0.24598	0.26162	FALSE	FALSE	0.11774	0.293771	FALSE
1170	0.0261491	0.0495049	0.890173	0.816605	0.0735687	FALSE	0.599002	1 vs 2	0.147137	1 vs 2	0.780347	0.633209	Gm20671:chr5:32736265-32736688:-1, Gm20671:chr5:32736705-32737182:-1	Gm20671	0.0796387	0.136873	FALSE	FALSE	0.0495049	0.154096	FALSE
1171	0.0261491	0.0495049	0.890173	0.816605	0.0735687	FALSE	0.599002	1 vs 2	0.147137	1 vs 2	0.780347	0.633209	Pisd:chr5:32736265-32736688:-1, Pisd:chr5:32736705-32737182:-1	Pisd	0.0796387	0.136873	FALSE	FALSE	0.0495049	0.154096	FALSE
1172	0.0243185	0.0458444	0.833333	0.759804	0.0735294	FALSE	0.457833	2 vs 1	0.147059	2 vs 1	0.666667	0.519608	Cpsf7:chr19:10546999-10547735:1, Cpsf7:chr19:10547281-10547739:1	Cpsf7	0.0752364	0.131092	FALSE	FALSE	0.0458444	0.146104	FALSE
1173	0.650174	NA	0.823529	0.766129	0.0574004	TRUE	0.532028	1 vs 2	0.147059	1 vs 2	0.647059	0.5	Foxo3:chr10:42181841-42182185:-1, Foxo3:chr10:42185081-42185424:-1, Foxo3:chr10:42247410-42247765:-1	Foxo3	NA	NA	FALSE	FALSE	0.650174	NA	FALSE
1174	0.0933059	0.153379	0.780786	0.694215	0.0865712	TRUE	1.08311	5 vs 2	0.146956	6 vs 1	0.427948	0.280992	Echdc1:chr10:29344343-29345218:1, Echdc1:chr10:29344850-29345082:1, Echdc1:chr10:29344949-29345408:1, Echdc1:chr10:29344785-29345960:1, Echdc1:chr10:29345511-29345851:1, Echdc1:chr10:29345638-29345943:1	Echdc1	NA	NA	FALSE	FALSE	0.153379	NA	FALSE
1175	0.520403	0.712649	0.402174	0.35989	0.0422838	TRUE	1.04575	3 vs 2	0.146918	3 vs 2	-0.369565	-0.516484	Clip4:chr17:71849823-71850193:1, Clip4:chr17:71856378-71856793:1, Clip4:chr17:71857753-71858412:1, Clip4:chr17:71858046-71858356:1, Clip4:chr17:71863717-71864087:1	Clip4	NA	NA	FALSE	FALSE	0.712649	NA	FALSE
1176	0.392135	0.483205	0.597107	0.602941	-0.00583374	TRUE	1.60944	3 vs 5	0.146816	3 vs 5	0.264463	0.117647	Prxl2c:chr13:64289804-64290139:-1, Prxl2c:chr13:64291155-64291376:-1, Prxl2c:chr13:64291054-64291717:-1, Prxl2c:chr13:64291784-64292114:-1, Prxl2c:chr13:64292018-64292235:-1	Prxl2c	NA	NA	FALSE	FALSE	0.483205	NA	FALSE
1177	0.460741	0.675535	0.35	0.370909	-0.0209091	TRUE	-0.798508	3 vs 2	0.146772	2 vs 1	0.304348	0.157576	Mios:chr6:8235339-8235544:1, Mios:chr6:8235387-8235803:1, Mios:chr6:8235708-8236064:1, Mios:chr6:8235873-8236298:1, Mios:chr6:8243639-8243866:1, Mios:chr6:8243779-8243848:1	Mios	NA	NA	FALSE	FALSE	0.675535	NA	FALSE
1178	0.279639	0.275641	0.816777	0.78403	0.032747	FALSE	-1.25276	3 vs 2	0.146547	7 vs 6	0.397351	0.250804	Bmpr2:chr1:59870215-59870539:1, Bmpr2:chr1:59870421-59870859:1, Bmpr2:chr1:59871600-59872014:1, Bmpr2:chr1:59874026-59874384:1, Bmpr2:chr1:59875523-59875876:1, Bmpr2:chr1:59876933-59877642:1, Bmpr2:chr1:59877258-59877644:1	Bmpr2	0.464845	0.461689	FALSE	FALSE	0.279639	0.530254	FALSE
1179	0.518671	NA	0.627119	0.553846	0.0732725	TRUE	0.303652	1 vs 2	0.146545	1 vs 2	0.254237	0.107692	Zfp37:chr4:62189535-62189909:-1, Zfp37:chr4:62190955-62191364:-1	Zfp37	NA	NA	FALSE	FALSE	0.518671	NA	FALSE
1180	0.000537695	0.000972349	0.905405	0.832192	0.0732136	FALSE	0.852729	3 vs 1	0.146427	3 vs 1	0.810811	0.664384	Tmem128:chr5:38267555-38267960:1, Tmem128:chr5:38268927-38269414:1, Tmem128:chr5:38269228-38269662:1	Tmem128	0.00286921	0.0052922	FALSE	FALSE	0.000972349	0.00570385	FALSE
1181	0.385464	0.427719	0.47957	0.492913	-0.0133435	TRUE	1.15167	3 vs 2	0.146347	3 vs 2	0.473118	0.326772	Eif2ak1:chr5:143901716-143902087:1, Eif2ak1:chr5:143902199-143902596:1, Eif2ak1:chr5:143902378-143902716:1, Eif2ak1:chr5:143902924-143903341:1, Eif2ak1:chr5:143903726-143904252:1, Eif2ak1:chr5:143903923-143904252:1	Eif2ak1	NA	NA	FALSE	FALSE	0.427719	NA	FALSE
1182	0.716992	NA	0.403846	0.360465	0.043381	TRUE	Inf	1 vs 2	0.146094	3 vs 5	0.153846	0.00775194	Paqr3:chr5:97081885-97082150:-1, Paqr3:chr5:97082010-97082550:-1, Paqr3:chr5:97082220-97082442:-1, Paqr3:chr5:97086909-97087366:-1, Paqr3:chr5:97095809-97096091:-1	Paqr3	NA	NA	FALSE	FALSE	0.716992	NA	FALSE
1183	0.0757736	0.149852	0.886463	0.813433	0.07303	TRUE	0.582637	2 vs 1	0.14606	2 vs 1	0.772926	0.626866	Fubp3:chr2:31616651-31617535:1, Fubp3:chr2:31617135-31617535:1	Fubp3	NA	NA	FALSE	FALSE	0.149852	NA	FALSE
1184	0.658776	0.574655	0.460227	0.383287	0.0769408	TRUE	#NAME?	2 vs 1	0.145914	9 vs 2	0.136364	-0.00955056	Runx1t1:chr4:13890034-13890274:1, Runx1t1:chr4:13890217-13890552:1, Runx1t1:chr4:13890765-13891147:1, Runx1t1:chr4:13890375-13891192:1, Runx1t1:chr4:13891103-13891373:1, Runx1t1:chr4:13891245-13891550:1, Runx1t1:chr4:13892282-13892625:1, Runx1t1:chr4:13893285-13893648:1, Runx1t1:chr4:13894643-13895062:1	Runx1t1	NA	NA	FALSE	FALSE	0.658776	NA	FALSE
1185	0.000461693	0.000407105	0.581973	0.529982	0.0519904	FALSE	1.4987	5 vs 2	0.145855	6 vs 4	-0.138095	-0.283951	Nsd2:chr5:33871338-33871572:1, Nsd2:chr5:33872053-33872669:1, Nsd2:chr5:33872412-33872837:1, Nsd2:chr5:33876920-33877326:1, Nsd2:chr5:33894835-33895685:1, Nsd2:chr5:33895119-33895507:1, Nsd2:chr5:33897288-33897895:1, Nsd2:chr5:33897654-33897980:1	Nsd2	0.00250577	0.00244667	FALSE	FALSE	0.000461693	0.00288132	FALSE
1186	0.274241	0.397094	0.519481	0.446646	0.0728342	TRUE	0.292192	2 vs 1	0.145668	2 vs 1	0.038961	-0.106707	Kif26a:chr12:112180885-112181329:1, Kif26a:chr12:112181405-112181747:1	Kif26a	NA	NA	FALSE	FALSE	0.397094	NA	FALSE
1187	0.192506	NA	0.512195	0.5	0.0121951	TRUE	1.039	2 vs 1	0.145515	2 vs 1	0.865854	0.720339	Dhx8:chr11:101766578-101767036:1, Dhx8:chr11:101767006-101767378:1, Dhx8:chr11:101768663-101768987:1	Dhx8	NA	NA	FALSE	FALSE	0.192506	NA	FALSE
1188	0.520948	NA	0.941176	0.868421	0.0727554	TRUE	0.885519	1 vs 2	0.145511	1 vs 2	0.882353	0.736842	Serpine2:chr1:79794300-79794630:-1, Serpine2:chr1:79794176-79794936:-1	Serpine2	NA	NA	FALSE	FALSE	0.520948	NA	FALSE
1189	0.284232	0.107705	0.664286	0.637931	0.0263547	TRUE	1.48427	1 vs 4	0.145484	1 vs 2	0.352381	0.206897	Zdhhc21:chr4:82798738-82799098:-1, Zdhhc21:chr4:82799506-82799806:-1, Zdhhc21:chr4:82802561-82802937:-1, Zdhhc21:chr4:82803900-82804130:-1, Zdhhc21:chr4:82804020-82804472:-1	Zdhhc21	NA	NA	FALSE	FALSE	0.284232	NA	FALSE
1190	0.672319	0.797737	0.614035	0.541333	0.0727018	TRUE	0.385262	1 vs 4	0.145474	1 vs 4	0.289474	0.144	Adamts18:chr8:113697124-113697582:-1, Adamts18:chr8:113697827-113697969:-1, Adamts18:chr8:113697934-113698366:-1, Adamts18:chr8:113698753-113699114:-1	Adamts18	NA	NA	FALSE	FALSE	0.797737	NA	FALSE
1191	0.002227	0.00377205	0.270492	0.235189	0.0353033	FALSE	-0.57201	4 vs 2	0.145176	3 vs 1	-0.244411	-0.389587	Wac:chr18:7926069-7926520:1, Wac:chr18:7926476-7927036:1, Wac:chr18:7926722-7927085:1, Wac:chr18:7927146-7927539:1, Wac:chr18:7926962-7927627:1	Wac	0.0101737	0.0172701	FALSE	FALSE	0.00377205	0.0189348	FALSE
1192	0.193043	0.433427	0.47549	0.428	0.0474902	TRUE	-1.31327	4 vs 5	0.145098	1 vs 4	-0.254902	-0.4	Mcur1:chr13:43538387-43538801:-1, Mcur1:chr13:43539865-43539932:-1, Mcur1:chr13:43540102-43540550:-1, Mcur1:chr13:43541316-43541756:-1, Mcur1:chr13:43541642-43541764:-1	Mcur1	NA	NA	FALSE	FALSE	0.433427	NA	FALSE
1193	0.0747114	0.125831	0.931034	0.858491	0.0725439	FALSE	0.79988	2 vs 1	0.145088	2 vs 1	0.862069	0.716981	Spata5:chr3:37529965-37530040:1, Spata5:chr3:37578711-37579119:1	Spata5	0.179221	0.273195	FALSE	FALSE	0.125831	0.306501	FALSE
1194	0.086032	0.259008	0.342593	0.248718	0.0938746	TRUE	1.90954	2 vs 3	0.145085	1 vs 4	-0.347222	-0.492308	Ddx19b:chr8:111003184-111003540:-1, Ddx19b:chr8:111005220-111005527:-1, Ddx19b:chr8:111006614-111007032:-1, Ddx19b:chr8:111007981-111008360:-1	Ddx19b	NA	NA	FALSE	FALSE	0.259008	NA	FALSE
1195	2.95121e-08	3.69903e-07	0.305785	0.233387	0.0723978	FALSE	0.369383	1 vs 2	0.144796	1 vs 2	-0.38843	-0.533225	Emc6:chr11:73175497-73175874:-1, Emc6:chr11:73176172-73176554:-1	Emc6	3.40731e-07	4.1286e-06	FALSE	FALSE	3.69903e-07	4.39044e-06	FALSE
1196	0.73942	NA	0.205882	0.158537	0.0473458	TRUE	0.432024	2 vs 3	0.144189	2 vs 3	-0.441176	-0.585366	Zfp111:chr7:24193224-24193508:-1, Zfp111:chr7:24195849-24196231:-1, Zfp111:chr7:24197642-24198077:-1	Zfp111	NA	NA	FALSE	FALSE	0.73942	NA	FALSE
1197	0.269214	NA	0.802721	0.764988	0.0377331	TRUE	1.59393	3 vs 4	0.144032	3 vs 4	0.122449	-0.0215827	Tmem69:chr4:116551470-116551873:-1, Tmem69:chr4:116551349-116552422:-1, Tmem69:chr4:116552309-116552680:-1, Tmem69:chr4:116552992-116553386:-1	Tmem69	NA	NA	FALSE	FALSE	0.269214	NA	FALSE
1198	0.109015	0.0349452	0.247706	0.175758	0.0719488	FALSE	0.434477	1 vs 2	0.143898	1 vs 2	-0.504587	-0.648485	Slc37a3:chr6:39334771-39335144:-1, Slc37a3:chr6:39335943-39336362:-1	Slc37a3	0.236572	0.106865	FALSE	FALSE	0.109015	0.277453	FALSE
1199	0.152641	0.339056	0.683594	0.620192	0.0634014	TRUE	-1.09861	3 vs 2	0.14363	5 vs 1	0.460938	0.317308	Tmem161b:chr13:84294604-84294954:1, Tmem161b:chr13:84294951-84295342:1, Tmem161b:chr13:84295277-84295723:1, Tmem161b:chr13:84295339-84295936:1, Tmem161b:chr13:84295439-84295971:1	Tmem161b	NA	NA	FALSE	FALSE	0.339056	NA	FALSE
1200	0.00956551	0.0248448	0.39251	0.320856	0.0716548	FALSE	0.313071	2 vs 1	0.14331	2 vs 1	-0.214979	-0.358289	Mmp14:chr14:54440867-54441235:1, Mmp14:chr14:54442031-54442522:1	Mmp14	0.0353145	0.0828845	FALSE	FALSE	0.0248448	0.0910618	FALSE
1201	0.382457	0.15068	0.735897	0.673367	0.0625306	TRUE	0.828693	4 vs 1	0.143293	4 vs 2	0.253846	0.110553	Ash1l:chr3:89077386-89077817:1, Ash1l:chr3:89078244-89078561:1, Ash1l:chr3:89078428-89078935:1, Ash1l:chr3:89079074-89079380:1	Ash1l	NA	NA	FALSE	FALSE	0.382457	NA	FALSE
1202	0.489943	NA	0.15625	0.0847458	0.0715042	TRUE	0.693147	1 vs 2	0.143008	1 vs 2	-0.6875	-0.830508	Dip2a:chr10:76262735-76263030:-1, Dip2a:chr10:76262998-76263452:-1	Dip2a	NA	NA	FALSE	FALSE	0.489943	NA	FALSE
1203	0.419184	0.555757	0.337209	0.336635	0.000574218	TRUE	0.404677	2 vs 1	0.14298	2 vs 1	0.511628	0.368648	Mef2c:chr13:83662328-83662776:1, Mef2c:chr13:83662811-83663248:1, Mef2c:chr13:83664102-83664453:1, Mef2c:chr13:83666701-83667080:1	Mef2c	NA	NA	FALSE	FALSE	0.555757	NA	FALSE
1204	0.0618681	0.0837104	0.360515	0.289062	0.0714525	FALSE	0.326812	1 vs 2	0.142905	1 vs 2	-0.27897	-0.421875	Zfp593:chr4:134243289-134243625:-1, Zfp593:chr4:134244633-134244970:-1	Zfp593	0.156831	0.201738	FALSE	FALSE	0.0837104	0.227406	FALSE
1205	0.777588	0.921484	0.5	0.428571	0.0714286	TRUE	0.847298	1 vs 3	0.142857	1 vs 3	0	-0.142857	Hps3:chr3:19995948-19996226:-1, Hps3:chr3:19996116-19996447:-1, Hps3:chr3:19996204-19996624:-1	Hps3	NA	NA	FALSE	FALSE	0.921484	NA	FALSE
1206	1	NA	0.571429	0.5	0.0714286	TRUE	0.287682	1 vs 2	0.142857	1 vs 2	0.142857	0	Jag1:chr2:137081444-137081787:-1, Jag1:chr2:137082491-137082800:-1	Jag1	NA	NA	FALSE	FALSE	1	NA	FALSE
1207	0.286099	NA	1	0.928571	0.0714286	TRUE	Inf	2 vs 1	0.142857	2 vs 1	1	0.857143	Kctd6:chr14:8222983-8223210:1, Kctd6:chr14:8223162-8223596:1	Kctd6	NA	NA	FALSE	FALSE	0.286099	NA	FALSE
1208	0.645159	NA	0.5	0.428571	0.0714286	TRUE	0.287682	1 vs 2	0.142857	1 vs 2	0	-0.142857	Pias1:chr9:62878332-62878704:-1, Pias1:chr9:62880056-62880427:-1	Pias1	NA	NA	FALSE	FALSE	0.645159	NA	FALSE
1209	1	NA	1	0.928571	0.0714286	TRUE	Inf	1 vs 2	0.142857	1 vs 2	1	0.857143	Rgs13:chr1:144138654-144139008:-1, Rgs13:chr1:144138841-144139023:-1	Rgs13	NA	NA	FALSE	FALSE	1	NA	FALSE
1210	0.710285	NA	0.321429	0.25	0.0714286	TRUE	0.351398	1 vs 2	0.142857	1 vs 2	-0.357143	-0.5	Ubox5:chr2:130589955-130590380:-1, Ubox5:chr2:130591279-130591753:-1	Ubox5	NA	NA	FALSE	FALSE	0.710285	NA	FALSE
1211	0.593444	0.682193	0.626984	0.594203	0.0327812	TRUE	#NAME?	3 vs 1	0.142857	2 vs 1	0.142857	0	Zscan22:chr7:12907692-12908433:1, Zscan22:chr7:12907922-12908220:1, Zscan22:chr7:12908470-12908563:1, Zscan22:chr7:12908531-12909088:1	Zscan22	NA	NA	FALSE	FALSE	0.682193	NA	FALSE
1212	1.19635e-21	1.35445e-20	0.552148	0.48073	0.071418	FALSE	0.445235	3 vs 1	0.142836	3 vs 1	0.104296	-0.0385399	Pabpn1:chr14:54897073-54897330:1, Pabpn1:chr14:54897808-54898196:1, Pabpn1:chr14:54898531-54898927:1	Pabpn1	3.84649e-20	4.49379e-19	FALSE	FALSE	1.35445e-20	4.84548e-19	FALSE
1213	0.687537	NA	0.629032	0.601852	0.0271804	TRUE	0.537143	2 vs 1	0.142772	2 vs 1	0.16129	0.0185185	Dmxl1:chr18:49963187-49963557:1, Dmxl1:chr18:49963720-49964275:1, Dmxl1:chr18:49963965-49964238:1	Dmxl1	NA	NA	FALSE	FALSE	0.687537	NA	FALSE
1214	0.28939	0.492843	0.664474	0.613497	0.0509768	TRUE	0.440556	1 vs 2	0.142759	1 vs 2	0.388158	0.245399	Tob2:chr15:81848270-81848585:-1, Tob2:chr15:81848864-81849283:-1, Tob2:chr15:81849669-81850079:-1	Tob2	NA	NA	FALSE	FALSE	0.492843	NA	FALSE
1215	0.725028	NA	0.814815	0.802817	0.0119979	TRUE	-0.693147	2 vs 4	0.142671	1 vs 2	0.537037	0.394366	Cdk14:chr5:4803384-4803712:-1, Cdk14:chr5:4803729-4804053:-1, Cdk14:chr5:4805770-4806213:-1, Cdk14:chr5:4888880-4889026:-1	Cdk14	NA	NA	FALSE	FALSE	0.725028	NA	FALSE
1216	0.0555344	0.0209382	0.832877	0.820814	0.0120622	TRUE	-3.17805	3 vs 2	0.142565	6 vs 3	0.753425	0.61086	Tgfbr1:chr4:47410609-47411434:1, Tgfbr1:chr4:47411190-47411421:1, Tgfbr1:chr4:47412803-47413132:1, Tgfbr1:chr4:47414204-47414529:1, Tgfbr1:chr4:47413969-47414931:1, Tgfbr1:chr4:47414557-47414931:1	Tgfbr1	NA	NA	FALSE	FALSE	0.0555344	NA	FALSE
1217	0.200294	0.310656	0.719298	0.648094	0.0712044	FALSE	0.330312	2 vs 1	0.142409	2 vs 1	0.438596	0.296188	Osbpl2:chr2:180162025-180162625:1, Osbpl2:chr2:180162352-180162684:1	Osbpl2	0.369632	0.499608	FALSE	FALSE	0.310656	0.565234	FALSE
1218	0.831766	NA	0.75	0.678862	0.0711382	TRUE	0.661895	3 vs 1	0.142276	3 vs 1	0.5	0.357724	Erc2:chr14:28316971-28317398:1, Erc2:chr14:28477903-28478441:1, Erc2:chr14:28478233-28478514:1	Erc2	NA	NA	FALSE	FALSE	0.831766	NA	FALSE
1219	0.594782	NA	0.575163	0.512195	0.0629683	TRUE	0.768371	3 vs 2	0.141798	3 vs 2	0.0686275	-0.0731707	Paqr8:chr1:20936978-20937481:1, Paqr8:chr1:20938220-20938906:1, Paqr8:chr1:20938725-20939066:1, Paqr8:chr1:20939351-20939642:1	Paqr8	NA	NA	FALSE	FALSE	0.594782	NA	FALSE
1220	0.166011	0.226404	0.550857	0.595732	-0.0448749	TRUE	1.43031	1 vs 5	0.141776	1 vs 2	-0.352	-0.493776	Kif2a:chr13:106958996-106959375:-1, Kif2a:chr13:106960528-106960977:-1, Kif2a:chr13:106961217-106961500:-1, Kif2a:chr13:106961301-106961740:-1, Kif2a:chr13:106961371-106961624:-1, Kif2a:chr13:106961420-106961898:-1, Kif2a:chr13:106961829-106962126:-1, Kif2a:chr13:106961979-106962217:-1	Kif2a	NA	NA	FALSE	FALSE	0.226404	NA	FALSE
1221	0.200265	0.33025	0.359477	0.292793	0.0666843	TRUE	1.04797	1 vs 2	0.141759	1 vs 4	-0.196078	-0.337838	Atxn3:chr12:101918901-101919212:-1, Atxn3:chr12:101922053-101922570:-1, Atxn3:chr12:101922994-101923511:-1, Atxn3:chr12:101932905-101933100:-1	Atxn3	NA	NA	FALSE	FALSE	0.33025	NA	FALSE
1222	0.180186	0.515971	0.323129	0.272727	0.050402	TRUE	1.45083	1 vs 2	0.141723	3 vs 4	0.0306122	-0.111111	Pigv:chr4:133655900-133656293:-1, Pigv:chr4:133659935-133660238:-1, Pigv:chr4:133661397-133661763:-1, Pigv:chr4:133662182-133662626:-1	Pigv	NA	NA	FALSE	FALSE	0.515971	NA	FALSE
1223	0.00490842	0.0215702	0.883657	0.812808	0.0708486	FALSE	0.559162	1 vs 2	0.141697	1 vs 2	0.767313	0.625616	Tmem230:chr2:132239467-132239869:-1, Tmem230:chr2:132239887-132240424:-1	Tmem230	0.020044	0.0738699	FALSE	FALSE	0.0215702	0.0817736	FALSE
1224	0.472903	NA	0.105263	0.0344828	0.0707804	TRUE	1.19214	3 vs 1	0.141561	3 vs 1	-0.789474	-0.931034	Pde3b:chr7:114537409-114538023:1, Pde3b:chr7:114537707-114537877:1, Pde3b:chr7:114537763-114538282:1	Pde3b	NA	NA	FALSE	FALSE	0.472903	NA	FALSE
1225	0.24737	0.393417	0.47451	0.425714	0.0487955	TRUE	2.5177	2 vs 6	0.141457	5 vs 6	0.117647	-0.0238095	Mef2a:chr7:67231163-67231681:-1, Mef2a:chr7:67231616-67231778:-1, Mef2a:chr7:67231906-67232226:-1, Mef2a:chr7:67233402-67233699:-1, Mef2a:chr7:67233877-67234182:-1, Mef2a:chr7:67234184-67234585:-1	Mef2a	NA	NA	FALSE	FALSE	0.393417	NA	FALSE
1226	0.604119	NA	0.526316	0.455696	0.0706196	TRUE	0.283042	1 vs 2	0.141239	1 vs 2	0.0526316	-0.0886076	Zfp729b:chr13:67589419-67589758:-1, Zfp729b:chr13:67590809-67591262:-1	Zfp729b	NA	NA	FALSE	FALSE	0.604119	NA	FALSE
1227	0.207739	0.0824157	0.532468	0.461864	0.0706031	FALSE	0.282892	2 vs 1	0.141206	2 vs 1	0.0649351	-0.0762712	Ift52:chr2:163045469-163045984:1, Ift52:chr2:163045768-163046179:1	Ift52	0.376897	0.199549	FALSE	FALSE	0.207739	0.436802	FALSE
1228	0.537042	NA	0.616667	0.54902	0.0676471	TRUE	0.616186	2 vs 1	0.141176	2 vs 1	-0.133333	-0.27451	Ptar1:chr19:23720007-23720644:1, Ptar1:chr19:23728524-23728956:1, Ptar1:chr19:23731263-23731668:1	Ptar1	NA	NA	FALSE	FALSE	0.537042	NA	FALSE
1229	0.847434	NA	0.833333	0.769231	0.0641026	TRUE	Inf	1 vs 3	0.141026	1 vs 2	0.333333	0.192308	Plekhm3:chr1:64789121-64789460:-1, Plekhm3:chr1:64793782-64794171:-1, Plekhm3:chr1:64793632-64794458:-1	Plekhm3	NA	NA	FALSE	FALSE	0.847434	NA	FALSE
1230	0.330341	0.1987	0.85	0.831395	0.0186047	TRUE	-0.999672	2 vs 1	0.141015	3 vs 2	0.536364	0.395349	Xndc1:chr7:102081950-102082453:1, Xndc1:chr7:102082233-102082680:1, Xndc1:chr7:102083429-102083762:1	Xndc1	NA	NA	FALSE	FALSE	0.330341	NA	FALSE
1231	2.96585e-05	4.34094e-05	0.771875	0.727538	0.0443372	FALSE	0.632148	1 vs 5	0.140979	1 vs 3	-0.01375	-0.154729	Caprin1:chr2:103764917-103765348:-1, Caprin1:chr2:103764988-103765515:-1, Caprin1:chr2:103765584-103766031:-1, Caprin1:chr2:103765672-103766549:-1, Caprin1:chr2:103766161-103766690:-1, Caprin1:chr2:103766522-103766973:-1, Caprin1:chr2:103766747-103766880:-1	Caprin1	0.000213407	0.000333405	FALSE	FALSE	4.34094e-05	0.00035873	FALSE
1232	0.13019	0.252912	0.955224	0.884831	0.0703924	TRUE	1.02127	2 vs 1	0.140785	2 vs 1	0.910448	0.769663	Tnfrsf21:chr17:43087835-43088233:1, Tnfrsf21:chr17:43088751-43089247:1	Tnfrsf21	NA	NA	FALSE	FALSE	0.252912	NA	FALSE
1233	0.296837	NA	0.223333	0.181818	0.0415152	TRUE	1.56075	3 vs 1	0.140606	3 vs 1	-0.586667	-0.727273	Mre11a:chr9:14833556-14834004:1, Mre11a:chr9:14834318-14834621:1, Mre11a:chr9:14835000-14835447:1, Mre11a:chr9:14836607-14837086:1, Mre11a:chr9:14836862-14837108:1	Mre11a	NA	NA	FALSE	FALSE	0.296837	NA	FALSE
1234	0.459553	0.536578	0.623431	0.553191	0.0702395	TRUE	0.290563	2 vs 1	0.140479	2 vs 1	0.246862	0.106383	Fancl:chr11:26470750-26471883:1, Fancl:chr11:26471499-26471883:1	Fancl	NA	NA	FALSE	FALSE	0.536578	NA	FALSE
1235	0.451852	0.673674	0.670588	0.628993	0.0415956	TRUE	0.50467	1 vs 2	0.140367	1 vs 2	0.270588	0.130221	Aph1b:chr9:66775202-66775577:-1, Aph1b:chr9:66776032-66776347:-1, Aph1b:chr9:66778819-66779195:-1, Aph1b:chr9:66778663-66779561:-1	Aph1b	NA	NA	FALSE	FALSE	0.673674	NA	FALSE
1236	0.288304	0.429626	0.238281	0.191932	0.0463497	FALSE	0.529694	1 vs 5	0.140345	3 vs 5	-0.223958	-0.364303	Zfp322a:chr13:23353103-23353320:-1, Zfp322a:chr13:23353103-23353496:-1, Zfp322a:chr13:23353436-23354117:-1, Zfp322a:chr13:23355354-23355633:-1, Zfp322a:chr13:23355525-23355900:-1	Zfp322a	0.473536	0.612091	FALSE	FALSE	0.429626	0.682885	FALSE
1237	0.389275	0.407603	0.516346	0.502956	0.0133905	TRUE	-1.14991	3 vs 4	0.140299	4 vs 7	-0.0961538	-0.236453	Fut9:chr4:25609332-25609532:-1, Fut9:chr4:25609332-25609697:-1, Fut9:chr4:25609376-25609965:-1, Fut9:chr4:25613868-25614236:-1, Fut9:chr4:25614729-25615137:-1, Fut9:chr4:25615865-25616346:-1, Fut9:chr4:25618154-25618743:-1, Fut9:chr4:25618589-25619236:-1, Fut9:chr4:25618932-25619235:-1, Fut9:chr4:25619024-25619363:-1, Fut9:chr4:25619247-25620110:-1	Fut9	NA	NA	FALSE	FALSE	0.407603	NA	FALSE
1238	0.0928872	0.251607	0.723529	0.653396	0.0701336	FALSE	0.328037	1 vs 2	0.140267	1 vs 2	0.447059	0.306792	Mospd1:chrX:53344576-53344975:-1, Mospd1:chrX:53345000-53345386:-1	Mospd1	0.2116	0.437326	FALSE	FALSE	0.251607	0.498893	FALSE
1239	0.384953	0.578708	0.920635	0.892086	0.0285486	TRUE	-1.25276	2 vs 3	0.140231	1 vs 2	0.730159	0.589928	Tent4a:chr13:69497924-69498279:-1, Tent4a:chr13:69497988-69498530:-1, Tent4a:chr13:69498495-69498627:-1	Tent4a	NA	NA	FALSE	FALSE	0.578708	NA	FALSE
1240	0.654875	0.772849	0.625	0.605505	0.0194954	TRUE	0.826679	3 vs 4	0.139908	3 vs 4	0.25	0.110092	Zfp26:chr9:20432946-20433323:-1, Zfp26:chr9:20433168-20433475:-1, Zfp26:chr9:20432690-20433236:-1, Zfp26:chr9:20433373-20433813:-1, Zfp26:chr9:20433905-20434238:-1	Zfp26	NA	NA	FALSE	FALSE	0.772849	NA	FALSE
1241	0.360859	NA	0.8	0.730159	0.0698413	TRUE	0.390866	2 vs 1	0.139683	2 vs 1	0.6	0.460317	Entpd4:chr14:69350053-69350252:1, Entpd4:chr14:69366282-69366722:1	Entpd4	NA	NA	FALSE	FALSE	0.360859	NA	FALSE
1242	0.0115224	0.0408519	0.255521	0.185819	0.0697014	FALSE	0.408026	2 vs 1	0.139403	2 vs 1	-0.488959	-0.628362	Bfar:chr16:13702354-13702732:1, Bfar:chr16:13703208-13703670:1	Bfar	0.0412208	0.120223	FALSE	FALSE	0.0408519	0.134062	FALSE
1243	0.607661	0.686258	0.433333	0.363636	0.069697	TRUE	0.291352	1 vs 2	0.139394	1 vs 2	-0.133333	-0.272727	Mbd4:chr6:115840697-115841032:-1, Mbd4:chr6:115842366-115842632:-1	Mbd4	NA	NA	FALSE	FALSE	0.686258	NA	FALSE
1244	0.459681	0.963746	0.416667	0.372832	0.0438343	TRUE	0.492133	3 vs 1	0.139099	2 vs 1	0.474359	0.33526	Zfp710:chr7:80086493-80086864:1, Zfp710:chr7:80092405-80092766:1, Zfp710:chr7:80093100-80094147:1	Zfp710	NA	NA	FALSE	FALSE	0.963746	NA	FALSE
1245	0.0283341	0.122191	0.52875	0.449461	0.0792891	TRUE	0.931558	4 vs 1	0.139003	3 vs 1	0.17	0.0309973	Med13l:chr5:118763498-118763948:1, Med13l:chr5:118763844-118764120:1, Med13l:chr5:118764317-118764647:1, Med13l:chr5:118764038-118764948:1, Med13l:chr5:118765037-118765438:1	Med13l	NA	NA	FALSE	FALSE	0.122191	NA	FALSE
1246	0.172735	0.0803891	0.951311	0.881905	0.0694061	FALSE	1.7346	3 vs 4	0.138876	1 vs 4	0.898876	0.76	Slc39a10:chr1:46807512-46807919:-1, Slc39a10:chr1:46809254-46809537:-1, Slc39a10:chr1:46809331-46809665:-1, Slc39a10:chr1:46809618-46810048:-1	Slc39a10	0.332889	0.196744	FALSE	FALSE	0.172735	0.382689	FALSE
1247	0.322569	NA	0.867925	0.798587	0.069338	TRUE	0.505248	2 vs 1	0.138676	2 vs 1	0.735849	0.597173	Lysmd4:chr7:67224918-67225267:1, Lysmd4:chr7:67228066-67228468:1	Lysmd4	NA	NA	FALSE	FALSE	0.322569	NA	FALSE
1248	0.0133329	0.0294465	0.779412	0.73519	0.0442222	FALSE	-1.70702	3 vs 1	0.13848	5 vs 3	0.550802	0.412322	Edc3:chr9:57748121-57748418:1, Edc3:chr9:57748262-57748969:1, Edc3:chr9:57748660-57748986:1, Edc3:chr9:57749177-57750159:1, Edc3:chr9:57749771-57750187:1	Edc3	0.0465187	0.0940317	FALSE	FALSE	0.0294465	0.103881	FALSE
1249	0.528261	NA	0.269939	0.233333	0.0366053	TRUE	0.392393	1 vs 3	0.138183	2 vs 3	0.0429448	-0.0952381	Tmem238:chr7:4784558-4784831:-1, Tmem238:chr7:4784557-4785148:-1, Tmem238:chr7:4785448-4785562:-1	Tmem238	NA	NA	FALSE	FALSE	0.528261	NA	FALSE
1250	0.00600489	0.201995	0.137809	0.0687679	0.0690413	FALSE	0.772165	1 vs 2	0.138083	1 vs 2	-0.724382	-0.862464	Ccdc167:chr17:29695942-29696332:-1, Ccdc167:chr17:29704262-29704542:-1	Ccdc167	0.0237207	0.374316	FALSE	FALSE	0.201995	0.427979	FALSE
1251	0.791757	NA	0.482759	0.413793	0.0689655	TRUE	0.279314	2 vs 1	0.137931	2 vs 1	-0.0344828	-0.172414	Dennd4b:chr3:90280305-90280667:1, Dennd4b:chr3:90283750-90283951:1	Dennd4b	NA	NA	FALSE	FALSE	0.791757	NA	FALSE
1252	0.773813	0.811014	0.353846	0.316327	0.0375196	TRUE	0.756205	4 vs 1	0.137886	4 vs 1	0.025641	-0.112245	Zfp873:chr10:82060089-82060449:1, Zfp873:chr10:82061171-82061628:1, Zfp873:chr10:82063964-82064864:1, Zfp873:chr10:82064718-82065142:1, Zfp873:chr10:82065033-82065143:1, Zfp873:chr10:82065200-82065522:1	Zfp873	NA	NA	FALSE	FALSE	0.811014	NA	FALSE
1253	0.394698	0.451804	0.178571	0.109658	0.0689135	TRUE	0.568183	2 vs 1	0.137827	2 vs 1	-0.642857	-0.780684	Rbfox1:chr16:7409627-7409961:1, Rbfox1:chr16:7412120-7412498:1	Rbfox1	NA	NA	FALSE	FALSE	0.451804	NA	FALSE
1254	0.0858104	0.0455034	0.715827	0.664931	0.0508968	FALSE	0.755376	2 vs 1	0.137715	2 vs 1	0.266187	0.128472	Dctn4:chr18:60556548-60557445:1, Dctn4:chr18:60556914-60557250:1, Dctn4:chr18:60558410-60558779:1	Dctn4	0.198917	0.130473	FALSE	FALSE	0.0858104	0.231929	FALSE
1255	0.0712197	0.0258831	0.200508	0.17801	0.0224971	FALSE	-0.576568	3 vs 2	0.137388	2 vs 1	-0.456853	-0.594241	Mycbp:chr4:123911016-123911307:1, Mycbp:chr4:123911889-123912261:1, Mycbp:chr4:123912979-123913454:1	Mycbp	0.172613	0.085875	FALSE	FALSE	0.0712197	0.200775	FALSE
1256	0.495924	NA	1	0.931373	0.0686275	TRUE	Inf	1 vs 2	0.137255	1 vs 2	1	0.862745	1110017D15Rik:chr4:41505009-41505240:-1, 1110017D15Rik:chr4:41505528-41505676:-1	1110017D15Rik	NA	NA	FALSE	FALSE	0.495924	NA	FALSE
1257	0.673111	0.757119	0.53626	0.463608	0.0726519	TRUE	0.559616	2 vs 5	0.137211	1 vs 5	0.0992366	-0.0379747	Cul4b:chrX:38531590-38531949:-1, Cul4b:chrX:38531488-38532257:-1, Cul4b:chrX:38533288-38533546:-1, Cul4b:chrX:38533169-38533790:-1, Cul4b:chrX:38533609-38533768:-1	Cul4b	NA	NA	FALSE	FALSE	0.757119	NA	FALSE
1258	0.148726	0.0125418	0.66573	0.597143	0.0685875	TRUE	0.538558	2 vs 1	0.137175	3 vs 1	0.331461	0.194286	Poc1b:chr10:99197173-99197631:1, Poc1b:chr10:99197397-99197653:1, Poc1b:chr10:99197665-99198075:1	Poc1b	NA	NA	FALSE	FALSE	0.148726	NA	FALSE
1259	0.270284	0.413991	0.766	0.726415	0.0395849	TRUE	0.329067	3 vs 2	0.13717	3 vs 2	0.34	0.20283	5730480H06Rik:chr5:48388050-48388315:1, 5730480H06Rik:chr5:48388215-48388867:1, 5730480H06Rik:chr5:48388503-48388834:1	5730480H06Rik	NA	NA	FALSE	FALSE	0.413991	NA	FALSE
1260	0.105334	0.193657	0.526984	0.458472	0.0685124	FALSE	0.274538	1 vs 2	0.137025	1 vs 2	0.0539683	-0.0830565	Gnpda2:chr5:69574913-69575450:-1, Gnpda2:chr5:69575859-69575998:-1	Gnpda2	0.230545	0.362471	FALSE	FALSE	0.193657	0.414048	FALSE
1261	0.610349	0.36332	0.518182	0.449721	0.0684611	TRUE	0.318221	1 vs 3	0.136922	1 vs 3	0.0363636	-0.100559	Fbxo33:chr12:59200631-59200935:-1, Fbxo33:chr12:59200642-59201070:-1, Fbxo33:chr12:59201373-59201704:-1	Fbxo33	NA	NA	FALSE	FALSE	0.610349	NA	FALSE
1262	0.038102	0.12654	0.741441	0.69797	0.0434719	FALSE	0.318269	1 vs 2	0.136818	1 vs 2	0.273874	0.137056	Twf1:chr15:94577939-94578323:-1, Twf1:chr15:94579056-94579471:-1, Twf1:chr15:94579572-94580052:-1	Twf1	0.108254	0.273888	FALSE	FALSE	0.12654	0.307278	FALSE
1263	0.233558	0.426319	0.642857	0.574468	0.0683891	FALSE	0.287682	2 vs 1	0.136778	2 vs 1	0.285714	0.148936	Agpat1:chr17:34612861-34613449:1, Agpat1:chr17:34613162-34613431:1	Agpat1	0.40913	0.608908	FALSE	FALSE	0.426319	0.679601	FALSE
1264	0.576294	0.768954	0.339233	0.290541	0.0486925	TRUE	0.439367	3 vs 1	0.136391	3 vs 1	-0.19469	-0.331081	Polr3e:chr7:120945414-120945880:1, Polr3e:chr7:120945719-120946399:1, Polr3e:chr7:120945913-120946233:1, Polr3e:chr7:120947107-120947425:1	Polr3e	NA	NA	FALSE	FALSE	0.768954	NA	FALSE
1265	0.146295	NA	0.908602	0.894068	0.0145344	TRUE	-1.54045	2 vs 3	0.136322	1 vs 2	0.763441	0.627119	Rab8b:chr9:66843641-66844015:-1, Rab8b:chr9:66847272-66847561:-1, Rab8b:chr9:66846991-66847953:-1	Rab8b	NA	NA	FALSE	FALSE	0.146295	NA	FALSE
1266	0.849723	0.613089	0.671053	0.59375	0.0773026	TRUE	0.788457	2 vs 5	0.136278	1 vs 5	0.368421	0.232143	Trim36:chr18:46165415-46165783:-1, Trim36:chr18:46165661-46165881:-1, Trim36:chr18:46165719-46166277:-1, Trim36:chr18:46166168-46166415:-1, Trim36:chr18:46166499-46166929:-1	Trim36	NA	NA	FALSE	FALSE	0.849723	NA	FALSE
1267	0.771808	NA	0.843137	0.817352	0.0257857	TRUE	Inf	2 vs 1	0.13618	4 vs 3	0.588235	0.452055	Magi2:chr5:20651150-20651393:1, Magi2:chr5:20651279-20651716:1, Magi2:chr5:20703277-20703777:1, Magi2:chr5:20704373-20704828:1	Magi2	NA	NA	FALSE	FALSE	0.771808	NA	FALSE
1268	0.167861	0.116926	0.628613	0.613777	0.0148356	TRUE	-0.923259	2 vs 5	0.135274	1 vs 2	0.404624	0.26935	Ephb1:chr9:101922128-101922461:-1, Ephb1:chr9:101922583-101922893:-1, Ephb1:chr9:101922128-101922717:-1, Ephb1:chr9:101922794-101923126:-1, Ephb1:chr9:101922761-101923419:-1	Ephb1	NA	NA	FALSE	FALSE	0.167861	NA	FALSE
1269	0.0481073	0.227115	0.12766	0.0600601	0.0675995	FALSE	0.828658	2 vs 1	0.135199	2 vs 1	-0.744681	-0.87988	Herc1:chr9:66508369-66508820:1, Herc1:chr9:66510685-66510990:1	Herc1	0.128759	0.40989	FALSE	FALSE	0.227115	0.465472	FALSE
1270	0.896653	NA	0.0675991	0	0.0675991	TRUE	Inf	2 vs 1	0.135198	2 vs 1	-0.864802	-1	Melk:chr4:44363848-44364343:1, Melk:chr4:44364286-44364675:1	Melk	NA	NA	FALSE	FALSE	0.896653	NA	FALSE
1271	0.111441	NA	0.971014	0.903427	0.0675877	FALSE	1.27565	2 vs 1	0.135175	2 vs 1	0.942029	0.806854	Irgq:chr7:24538014-24538600:1, Irgq:chr7:24538257-24538600:1	Irgq	0.240288	NA	FALSE	FALSE	0.111441	0.281405	FALSE
1272	0.590177	NA	0.878378	0.82906	0.0493185	TRUE	Inf	2 vs 1	0.135135	4 vs 2	0.635135	0.5	Zbtb24:chr10:41453039-41453122:1, Zbtb24:chr10:41453101-41453479:1, Zbtb24:chr10:41464681-41465249:1, Zbtb24:chr10:41465235-41465568:1	Zbtb24	NA	NA	FALSE	FALSE	0.590177	NA	FALSE
1273	0.00302898	0.00103471	0.472769	0.40531	0.0674597	FALSE	0.274359	1 vs 2	0.134919	1 vs 2	-0.0544612	-0.189381	Mat2a:chr6:72432748-72433153:-1, Mat2a:chr6:72433701-72434027:-1	Mat2a	0.0133338	0.00555448	FALSE	FALSE	0.00302898	0.0157012	FALSE
1274	0.483028	0.488316	0.450909	0.363574	0.0873352	TRUE	1.11461	6 vs 4	0.134895	5 vs 1	-0.109091	-0.243986	Grip1:chr10:120075215-120075596:1, Grip1:chr10:120076217-120077013:1, Grip1:chr10:120076590-120076929:1, Grip1:chr10:120076760-120077038:1, Grip1:chr10:120076864-120077134:1, Grip1:chr10:120086948-120087238:1	Grip1	NA	NA	FALSE	FALSE	0.488316	NA	FALSE
1275	0.423068	0.672895	0.75	0.71049	0.0395095	TRUE	0.286321	1 vs 2	0.134452	1 vs 2	0.15625	0.0217984	Hs6st2:chrX:51387179-51387564:-1, Hs6st2:chrX:51387679-51388010:-1, Hs6st2:chrX:51389377-51389748:-1	Hs6st2	NA	NA	FALSE	FALSE	0.672895	NA	FALSE
1276	0.519682	0.673976	0.514493	0.452778	0.061715	TRUE	0.764606	3 vs 1	0.13442	3 vs 2	-0.173913	-0.308333	Ppp6r2:chr15:89259686-89260051:1, Ppp6r2:chr15:89286055-89286215:1, Ppp6r2:chr15:89286217-89287223:1, Ppp6r2:chr15:89286670-89286997:1	Ppp6r2	NA	NA	FALSE	FALSE	0.673976	NA	FALSE
1277	0.189712	0.0692394	0.781132	0.761499	0.0196329	FALSE	#NAME?	3 vs 1	0.134411	6 vs 4	0.308176	0.173765	Chmp1b:chr18:67206021-67206327:1, Chmp1b:chr18:67206311-67206730:1, Chmp1b:chr18:67206299-67206911:1, Chmp1b:chr18:67206468-67206729:1, Chmp1b:chr18:67206642-67206998:1, Chmp1b:chr18:67207444-67207841:1	Chmp1b	0.354315	0.175134	FALSE	FALSE	0.189712	0.406983	FALSE
1278	0.05478	0.444791	0.271472	0.238051	0.0334209	FALSE	-1.44692	3 vs 2	0.134135	2 vs 1	-0.546012	-0.680147	Iws1:chr18:32097039-32097630:1, Iws1:chr18:32097943-32098647:1, Iws1:chr18:32098652-32098910:1, Iws1:chr18:32098808-32099159:1, Iws1:chr18:32104032-32104300:1	Iws1	0.143149	0.622347	FALSE	FALSE	0.444791	0.692685	FALSE
1279	0.437619	NA	0.178571	0.111562	0.0670096	TRUE	0.548829	2 vs 1	0.134019	2 vs 1	-0.642857	-0.776876	Mgll:chr6:88825588-88825867:1, Mgll:chr6:88828013-88828360:1	Mgll	NA	NA	FALSE	FALSE	0.437619	NA	FALSE
1280	0.215356	NA	0.615385	0.548387	0.0669975	TRUE	1.06171	1 vs 3	0.133995	1 vs 3	0.230769	0.0967742	Zfp609:chr9:65691482-65691936:-1, Zfp609:chr9:65692331-65692776:-1, Zfp609:chr9:65693689-65694076:-1	Zfp609	NA	NA	FALSE	FALSE	0.215356	NA	FALSE
1281	0.161381	0.285105	0.468293	0.395	0.0732927	TRUE	0.910212	4 vs 3	0.133841	6 vs 1	-0.103659	-0.2375	Dram2:chr3:106573518-106573979:1, Dram2:chr3:106573836-106574171:1, Dram2:chr3:106574108-106574488:1, Dram2:chr3:106574028-106574298:1, Dram2:chr3:106574508-106574831:1, Dram2:chr3:106574335-106575008:1	Dram2	NA	NA	FALSE	FALSE	0.285105	NA	FALSE
1282	0.215691	0.340588	0.473404	0.426087	0.0473173	TRUE	0.572571	1 vs 2	0.133488	1 vs 2	-0.340426	-0.473913	Bmt2:chr6:13625667-13625965:-1, Bmt2:chr6:13625951-13626271:-1, Bmt2:chr6:13626776-13627193:-1	Bmt2	NA	NA	FALSE	FALSE	0.340588	NA	FALSE
1283	1	NA	0.9	0.833333	0.0666667	TRUE	0.587787	1 vs 2	0.133333	1 vs 2	0.8	0.666667	Azin2:chr4:128931990-128932319:-1, Azin2:chr4:128932127-128932494:-1	Azin2	NA	NA	FALSE	FALSE	1	NA	FALSE
1284	0.373284	0.0440503	0.304762	0.299206	0.00555556	TRUE	-1.14681	1 vs 3	0.133333	6 vs 7	0.142857	0.00952381	Nipbl:chr15:8289814-8290257:-1, Nipbl:chr15:8290268-8290632:-1, Nipbl:chr15:8290483-8290762:-1, Nipbl:chr15:8290395-8291073:-1, Nipbl:chr15:8290610-8290906:-1, Nipbl:chr15:8290919-8291241:-1, Nipbl:chr15:8291124-8291560:-1	Nipbl	NA	NA	FALSE	FALSE	0.373284	NA	FALSE
1285	1	NA	1	0.933333	0.0666667	TRUE	Inf	2 vs 1	0.133333	2 vs 1	1	0.866667	Pafah2:chr4:134426952-134427306:1, Pafah2:chr4:134427075-134427413:1	Pafah2	NA	NA	FALSE	FALSE	1	NA	FALSE
1286	0.480413	NA	0.184211	0.117647	0.0665635	TRUE	0.526826	1 vs 2	0.133127	1 vs 2	-0.631579	-0.764706	Nrip1:chr16:76287682-76288100:-1, Nrip1:chr16:76290744-76291070:-1	Nrip1	NA	NA	FALSE	FALSE	0.480413	NA	FALSE
1287	0.348115	NA	0.549708	0.488215	0.0614921	TRUE	0.998529	4 vs 1	0.132908	4 vs 2	-0.210526	-0.343434	Dyrk1b:chr7:28186728-28187322:1, Dyrk1b:chr7:28186993-28187306:1, Dyrk1b:chr7:28197144-28197477:1, Dyrk1b:chr7:28197573-28197913:1	Dyrk1b	NA	NA	FALSE	FALSE	0.348115	NA	FALSE
1288	0.606681	NA	0.785714	0.75	0.0357143	TRUE	0.587787	3 vs 2	0.132653	3 vs 2	0.632653	0.5	Zfp960:chr17:17088968-17089192:1, Zfp960:chr17:17089118-17089431:1, Zfp960:chr17:17089258-17089631:1	Zfp960	NA	NA	FALSE	FALSE	0.606681	NA	FALSE
1289	0.018384	0.0402089	0.235789	0.169492	0.0662979	FALSE	0.413331	2 vs 1	0.132596	2 vs 1	-0.528421	-0.661017	Fbln1:chr15:85251483-85251930:1, Fbln1:chr15:85285286-85285718:1	Fbln1	0.0599427	0.118619	FALSE	FALSE	0.0402089	0.132457	FALSE
1290	0.435024	0.592996	0.192982	0.126761	0.0662219	TRUE	0.499164	2 vs 1	0.132444	2 vs 1	-0.614035	-0.746479	Washc4:chr10:83595960-83596568:1, Washc4:chr10:83596205-83596426:1	Washc4	NA	NA	FALSE	FALSE	0.592996	NA	FALSE
1291	1	NA	0.441176	0.375	0.0661765	TRUE	0.274437	2 vs 1	0.132353	2 vs 1	-0.117647	-0.25	Kif1c:chr11:70729070-70729530:1, Kif1c:chr11:70730014-70730426:1	Kif1c	NA	NA	FALSE	FALSE	1	NA	FALSE
1292	0.19205	0.181841	0.978723	0.912621	0.066102	TRUE	1.48257	2 vs 1	0.132204	2 vs 1	0.957447	0.825243	Shisa5:chr9:109056579-109056958:1, Shisa5:chr9:109057333-109057739:1	Shisa5	NA	NA	FALSE	FALSE	0.19205	NA	FALSE
1293	0.305915	0.393017	0.321101	0.255034	0.0660674	TRUE	0.323227	2 vs 1	0.132135	2 vs 1	-0.357798	-0.489933	Cpox:chr16:58678987-58679377:1, Cpox:chr16:58680052-58680389:1	Cpox	NA	NA	FALSE	FALSE	0.393017	NA	FALSE
1294	0.110706	0.469527	0.621324	0.637722	-0.0163989	FALSE	0.819229	1 vs 3	0.13196	1 vs 2	-0.213235	-0.345196	Kcnk10:chr12:98429435-98429799:-1, Kcnk10:chr12:98433691-98434300:-1, Kcnk10:chr12:98434099-98434540:-1, Kcnk10:chr12:98434665-98434994:-1, Kcnk10:chr12:98434761-98435106:-1, Kcnk10:chr12:98456718-98456974:-1	Kcnk10	0.23911	0.645037	FALSE	FALSE	0.469527	0.714559	FALSE
1295	1	NA	1	0.934066	0.0659341	TRUE	Inf	1 vs 2	0.131868	1 vs 2	1	0.868132	Psd:chr19:46312083-46312393:-1, Psd:chr19:46312083-46312585:-1	Psd	NA	NA	FALSE	FALSE	1	NA	FALSE
1296	0.0773617	0.0643475	0.656442	0.590588	0.0658535	FALSE	0.28108	2 vs 1	0.131707	2 vs 1	0.312883	0.181176	Pinx1:chr14:63919126-63919860:1, Pinx1:chr14:63919497-63919854:1	Pinx1	0.184333	0.165797	FALSE	FALSE	0.0773617	0.213667	FALSE
1297	0.017646	0.0283235	0.27561	0.209779	0.0658306	FALSE	0.359913	1 vs 2	0.131661	1 vs 2	-0.44878	-0.580442	Klf13:chr7:63886335-63886748:-1, Klf13:chr7:63891351-63891722:-1	Klf13	0.057983	0.0913442	FALSE	FALSE	0.0283235	0.1009	FALSE
1298	0.613154	0.824808	0.741573	0.6875	0.054073	TRUE	0.368424	1 vs 3	0.131496	1 vs 2	0.303371	0.171875	Arfip1:chr3:84496066-84496396:-1, Arfip1:chr3:84496188-84496515:-1, Arfip1:chr3:84496248-84496914:-1	Arfip1	NA	NA	FALSE	FALSE	0.824808	NA	FALSE
1299	0.613154	0.824808	0.741573	0.6875	0.054073	TRUE	0.368424	1 vs 3	0.131496	1 vs 2	0.303371	0.171875	Gm37240:chr3:84496066-84496396:-1, Gm37240:chr3:84496188-84496515:-1, Gm37240:chr3:84496248-84496914:-1	Gm37240	NA	NA	FALSE	FALSE	0.824808	NA	FALSE
1300	0.0434913	0.0557683	0.494615	0.4896	0.00501538	TRUE	#NAME?	10 vs 1	0.131385	5 vs 4	0.115385	-0.016	Pds5b:chr5:150808198-150808850:1, Pds5b:chr5:150808714-150808986:1, Pds5b:chr5:150808918-150809248:1, Pds5b:chr5:150809285-150809541:1, Pds5b:chr5:150809429-150809904:1, Pds5b:chr5:150809751-150809967:1, Pds5b:chr5:150809857-150810095:1, Pds5b:chr5:150809910-150810269:1, Pds5b:chr5:150810115-150810481:1, Pds5b:chr5:150810719-150810823:1, Pds5b:chr5:150810249-150810737:1	Pds5b	NA	NA	FALSE	FALSE	0.0557683	NA	FALSE
1301	0.201607	0.0684069	0.457108	0.412281	0.0448271	TRUE	#NAME?	3 vs 1	0.131364	7 vs 1	0.213235	0.0818713	Naa15:chr3:51472662-51473055:1, Naa15:chr3:51473731-51474007:1, Naa15:chr3:51474440-51474659:1, Naa15:chr3:51474565-51475042:1, Naa15:chr3:51474733-51475066:1, Naa15:chr3:51474902-51475564:1, Naa15:chr3:51475138-51475441:1	Naa15	NA	NA	FALSE	FALSE	0.201607	NA	FALSE
1302	0.040884	0.125199	0.175097	0.109489	0.0656082	FALSE	0.546047	2 vs 1	0.131216	2 vs 1	-0.649805	-0.781022	Cstf1:chr2:172380681-172381131:1, Cstf1:chr2:172382070-172382448:1	Cstf1	0.114241	0.27269	FALSE	FALSE	0.125199	0.306068	FALSE
1303	0.236268	0.39094	0.264706	0.199115	0.0655908	FALSE	0.370183	1 vs 2	0.131182	1 vs 2	-0.470588	-0.60177	Elp1:chr4:56750704-56751589:-1, Elp1:chr4:56751012-56751339:-1	Elp1	0.412454	0.578	FALSE	FALSE	0.39094	0.64791	FALSE
1304	0.98339	NA	0.940568	0.875	0.0655685	TRUE	0.81575	1 vs 2	0.131137	1 vs 2	0.881137	0.75	Kif2c:chr4:117159633-117160012:-1, Kif2c:chr4:117159982-117160522:-1	Kif2c	NA	NA	FALSE	FALSE	0.98339	NA	FALSE
1305	0.265744	0.337712	0.800493	0.769231	0.0312618	FALSE	0.279194	3 vs 2	0.130906	3 vs 2	0.261084	0.130178	B4gat1:chr19:5040448-5040679:1, B4gat1:chr19:5040553-5041062:1, B4gat1:chr19:5040796-5041134:1	B4gat1	0.448498	0.527362	FALSE	FALSE	0.337712	0.593433	FALSE
1306	0.299675	0.307559	0.913043	0.847619	0.0654244	TRUE	0.635328	2 vs 1	0.130849	2 vs 1	0.826087	0.695238	Ccdc137:chr11:120463247-120463839:1, Ccdc137:chr11:120463988-120464389:1	Ccdc137	NA	NA	FALSE	FALSE	0.307559	NA	FALSE
1307	0.574614	0.751103	0.667797	0.613913	0.0538836	TRUE	Inf	2 vs 1	0.130656	5 vs 2	0.491525	0.36087	Avl9:chr6:56757181-56757812:1, Avl9:chr6:56757429-56757839:1, Avl9:chr6:56758364-56758650:1, Avl9:chr6:56758809-56759199:1, Avl9:chr6:56761558-56761938:1, Avl9:chr6:56762272-56762648:1	Avl9	NA	NA	FALSE	FALSE	0.751103	NA	FALSE
1308	0.523001	0.290865	0.287037	0.221739	0.0652979	TRUE	0.523729	3 vs 1	0.130596	3 vs 1	-0.425926	-0.556522	Zbtb9:chr17:26975830-26976217:1, Zbtb9:chr17:26976705-26977452:1, Zbtb9:chr17:26979816-26980226:1	Zbtb9	NA	NA	FALSE	FALSE	0.523001	NA	FALSE
1309	0.673911	NA	0.479769	0.458333	0.0214355	TRUE	Inf	1 vs 2	0.130539	1 vs 2	-0.786127	-0.916667	Dsn1:chr2:156994043-156994449:-1, Dsn1:chr2:156995243-156995641:-1, Dsn1:chr2:156995148-156995959:-1	Dsn1	NA	NA	FALSE	FALSE	0.673911	NA	FALSE
1310	0.022766	0.0796835	0.0793651	0.0141509	0.0652141	TRUE	1.79272	2 vs 1	0.130428	2 vs 1	-0.84127	-0.971698	Cxcl12:chr6:117174623-117175062:1, Cxcl12:chr6:117180997-117181382:1	Cxcl12	NA	NA	FALSE	FALSE	0.0796835	NA	FALSE
1311	0.0353591	0.0834689	0.770517	0.705405	0.0651113	FALSE	0.465538	3 vs 2	0.130223	3 vs 1	0.541033	0.410811	Ubtd2:chr11:32516245-32516728:1, Ubtd2:chr11:32517481-32517851:1, Ubtd2:chr11:32518312-32518761:1	Ubtd2	0.101368	0.201356	FALSE	FALSE	0.0834689	0.226993	FALSE
1312	0.0506223	0.141206	0.796599	0.773929	0.0226701	FALSE	-0.854789	3 vs 6	0.130187	1 vs 3	0.503401	0.373214	Rnd3:chr2:51130446-51130738:-1, Rnd3:chr2:51130390-51131032:-1, Rnd3:chr2:51131333-51131750:-1, Rnd3:chr2:51131947-51132773:-1, Rnd3:chr2:51132252-51132587:-1, Rnd3:chr2:51133507-51133882:-1	Rnd3	0.134639	0.296105	FALSE	FALSE	0.141206	0.33087	FALSE
1313	0.00695584	0.0487343	0.73444	0.669404	0.0650362	FALSE	0.342837	3 vs 1	0.130072	3 vs 1	0.46888	0.338807	Syf2:chr4:134936789-134937204:1, Syf2:chr4:134937018-134937481:1, Syf2:chr4:134937175-134937548:1	Syf2	0.0269327	0.136243	FALSE	FALSE	0.0487343	0.152746	FALSE
1314	0.370307	0.569301	0.738739	0.715942	0.0227967	TRUE	1.22964	2 vs 4	0.129965	2 vs 4	0.486486	0.356522	Sel1l:chr12:91806010-91806416:-1, Sel1l:chr12:91806621-91806925:-1, Sel1l:chr12:91808332-91808739:-1, Sel1l:chr12:91808455-91809183:-1	Sel1l	NA	NA	FALSE	FALSE	0.569301	NA	FALSE
1315	0.0157562	0.0130371	0.454984	0.390244	0.06474	FALSE	0.265734	1 vs 2	0.12948	1 vs 2	-0.0900322	-0.219512	Prmt5:chr14:54507178-54507513:-1, Prmt5:chr14:54507417-54507852:-1	Prmt5	0.0530778	0.048245	FALSE	FALSE	0.0157562	0.0631241	FALSE
1316	0.453296	0.645778	0.767857	0.703226	0.0646313	TRUE	0.333544	1 vs 2	0.129263	1 vs 2	0.535714	0.406452	Rab12:chr17:66494446-66494889:-1, Rab12:chr17:66494923-66495375:-1	Rab12	NA	NA	FALSE	FALSE	0.645778	NA	FALSE
1317	0.335391	0.625506	0.421158	0.39901	0.0221478	FALSE	1.05939	6 vs 5	0.129069	6 vs 3	-0.45509	-0.584158	Alkbh8:chr9:3385212-3385639:1, Alkbh8:chr9:3385523-3386137:1, Alkbh8:chr9:3385753-3386153:1, Alkbh8:chr9:3386534-3387154:1, Alkbh8:chr9:3387088-3387279:1, Alkbh8:chr9:3390284-3390748:1, Alkbh8:chr9:3390742-3391174:1	Alkbh8	0.522635	0.770196	FALSE	FALSE	0.625506	0.838962	FALSE
1318	0.591002	NA	0.682609	0.666667	0.015942	TRUE	0.592051	2 vs 3	0.128986	2 vs 3	0.295652	0.166667	2900026A02Rik:chr5:113086323-113086664:-1, 2900026A02Rik:chr5:113086555-113086846:-1, 2900026A02Rik:chr5:113089199-113089639:-1	2900026A02Rik	NA	NA	FALSE	FALSE	0.591002	NA	FALSE
1319	0.0224275	0.00969266	0.654762	0.606602	0.0481594	FALSE	0.653541	1 vs 2	0.128887	1 vs 2	0.537415	0.408528	Gosr2:chr11:103676834-103677201:-1, Gosr2:chr11:103677929-103678679:-1, Gosr2:chr11:103679079-103679456:-1	Gosr2	0.0706774	0.037803	FALSE	FALSE	0.0224275	0.0845192	FALSE
1320	0.230118	NA	0.921569	0.857143	0.0644258	TRUE	0.672094	2 vs 1	0.128852	2 vs 1	0.843137	0.714286	Ifrd2:chr9:107592022-107592957:1, Ifrd2:chr9:107592649-107593053:1	Ifrd2	NA	NA	FALSE	FALSE	0.230118	NA	FALSE
1321	1	NA	0.842105	0.777778	0.0643275	TRUE	0.421213	2 vs 1	0.128655	2 vs 1	0.684211	0.555556	Cep135:chr5:76646151-76646535:1, Cep135:chr5:76646390-76646756:1	Cep135	NA	NA	FALSE	FALSE	1	NA	FALSE
1322	0.164337	0.213058	0.305195	0.280571	0.0246234	TRUE	2.26176	8 vs 3	0.128606	8 vs 6	0.0606061	-0.068	Mmp16:chr4:18116268-18116678:1, Mmp16:chr4:18116887-18117643:1, Mmp16:chr4:18117132-18117480:1, Mmp16:chr4:18118313-18118775:1, Mmp16:chr4:18118649-18119213:1, Mmp16:chr4:18122003-18122435:1, Mmp16:chr4:18123554-18123885:1, Mmp16:chr4:18124878-18125047:1	Mmp16	NA	NA	FALSE	FALSE	0.213058	NA	FALSE
1323	0.0169211	0.0376815	0.870918	0.806691	0.0642261	FALSE	0.480443	1 vs 2	0.128452	1 vs 2	0.741835	0.613383	Jam3:chr9:27097360-27097736:-1, Jam3:chr9:27097439-27098054:-1	Jam3	0.0560359	0.112812	FALSE	FALSE	0.0376815	0.12577	FALSE
1324	0.801313	NA	0.349462	0.333333	0.016129	TRUE	0.570545	2 vs 1	0.12836	2 vs 1	-0.225806	-0.354167	Mcph1:chr8:18632364-18632721:1, Mcph1:chr8:18802168-18802824:1, Mcph1:chr8:18802785-18803260:1, Mcph1:chr8:18803149-18803376:1	Mcph1	NA	NA	FALSE	FALSE	0.801313	NA	FALSE
1325	7.22582e-08	6.95747e-08	0.46156	0.430492	0.0310678	FALSE	0.806229	3 vs 7	0.128317	6 vs 7	0.0850168	-0.0432999	Pbx1:chr1:168119974-168120352:-1, Pbx1:chr1:168153533-168153876:-1, Pbx1:chr1:168153533-168154338:-1, Pbx1:chr1:168154971-168155435:-1, Pbx1:chr1:168155272-168155999:-1, Pbx1:chr1:168155496-168155854:-1, Pbx1:chr1:168158293-168158709:-1	Pbx1	7.97982e-07	8.71031e-07	FALSE	FALSE	7.22582e-08	9.60921e-07	FALSE
1326	0.753644	NA	0.551724	0.5	0.0517241	TRUE	0.71562	1 vs 2	0.128276	1 vs 2	0.448276	0.32	Maml3:chr3:51687608-51687904:-1, Maml3:chr3:51687752-51688019:-1, Maml3:chr3:51687913-51688344:-1	Maml3	NA	NA	FALSE	FALSE	0.753644	NA	FALSE
1327	0.522548	0.850924	0.830675	0.791667	0.0390082	TRUE	0.587787	4 vs 3	0.128221	4 vs 3	0.628221	0.5	Tfap2c:chr2:172557314-172557590:1, Tfap2c:chr2:172557092-172557890:1, Tfap2c:chr2:172557563-172557777:1, Tfap2c:chr2:172558216-172558622:1	Tfap2c	NA	NA	FALSE	FALSE	0.850924	NA	FALSE
1328	0.530313	0.559582	0.464744	0.401709	0.0630342	TRUE	0.777705	2 vs 1	0.128205	4 vs 1	-0.0769231	-0.205128	Slc25a16:chr10:62944275-62944401:1, Slc25a16:chr10:62945710-62946406:1, Slc25a16:chr10:62945962-62946414:1, Slc25a16:chr10:62946106-62946502:1	Slc25a16	NA	NA	FALSE	FALSE	0.559582	NA	FALSE
1329	0.574296	0.659875	0.398352	0.376984	0.0213675	TRUE	#NAME?	1 vs 3	0.128205	2 vs 5	-0.10989	-0.238095	Wwc2:chr8:47826068-47826423:-1, Wwc2:chr8:47826220-47827158:-1, Wwc2:chr8:47827307-47828161:-1, Wwc2:chr8:47827599-47827999:-1, Wwc2:chr8:47828481-47828849:-1	Wwc2	NA	NA	FALSE	FALSE	0.659875	NA	FALSE
1330	0.0307746	0.0669807	0.843085	0.778986	0.0640996	FALSE	1.00958	2 vs 1	0.128199	3 vs 1	0.68617	0.557971	Plpbp:chr8:27049272-27049595:1, Plpbp:chr8:27053924-27054570:1, Plpbp:chr8:27054205-27054580:1	Plpbp	0.0906817	0.171488	FALSE	FALSE	0.0669807	0.193542	FALSE
1331	0.325374	0.536947	0.599156	0.553991	0.0451655	TRUE	-0.791993	2 vs 3	0.128187	3 vs 4	-0.0126582	-0.140845	Myo1b:chr1:51749766-51750101:-1, Myo1b:chr1:51749795-51750464:-1, Myo1b:chr1:51750015-51750285:-1, Myo1b:chr1:51751001-51751355:-1	Myo1b	NA	NA	FALSE	FALSE	0.536947	NA	FALSE
1332	0.390305	NA	0.775862	0.711779	0.0640826	TRUE	0.337671	2 vs 1	0.128165	2 vs 1	0.551724	0.423559	Sgtb:chr13:104140900-104141393:1, Sgtb:chr13:104142106-104142492:1	Sgtb	NA	NA	FALSE	FALSE	0.390305	NA	FALSE
1333	0.00637896	0.364607	0.594675	0.591837	0.00283782	FALSE	1.23537	2 vs 3	0.128004	2 vs 3	-0.218935	-0.346939	Ddx21:chr10:62580211-62580600:-1, Ddx21:chr10:62580085-62581051:-1, Ddx21:chr10:62582067-62582468:-1	Ddx21	0.0249925	0.556095	FALSE	FALSE	0.364607	0.623219	FALSE
1334	0.53452	0.862166	0.479296	0.466667	0.0126294	TRUE	0.539674	2 vs 3	0.12795	2 vs 3	0.52795	0.4	Tox3:chr8:90247136-90247405:-1, Tox3:chr8:90246988-90247562:-1, Tox3:chr8:90247450-90247846:-1, Tox3:chr8:90247973-90248280:-1	Tox3	NA	NA	FALSE	FALSE	0.862166	NA	FALSE
1335	0.33439	0.301529	0.427152	0.383721	0.0434314	TRUE	0.720897	2 vs 1	0.127522	2 vs 1	-0.384106	-0.511628	Klf3:chr5:64829121-64829625:1, Klf3:chr5:64832173-64832922:1, Klf3:chr5:64832525-64832922:1	Klf3	NA	NA	FALSE	FALSE	0.33439	NA	FALSE
1336	0.00999734	0.365304	0.243866	0.197949	0.0459175	FALSE	1.83328	3 vs 4	0.127017	3 vs 6	-0.39777	-0.524786	Nkapd1:chr9:50605227-50605548:-1, Nkapd1:chr9:50605342-50605883:-1, Nkapd1:chr9:50605944-50606356:-1, Nkapd1:chr9:50606178-50606810:-1, Nkapd1:chr9:50607526-50607931:-1, Nkapd1:chr9:50607741-50608068:-1	Nkapd1	0.0366954	0.556457	FALSE	FALSE	0.365304	0.62357	FALSE
1337	0.353607	NA	0.359589	0.296296	0.0632927	TRUE	0.287849	2 vs 1	0.126585	2 vs 1	-0.280822	-0.407407	Chd7:chr4:8866447-8866792:1, Chd7:chr4:8867295-8867686:1	Chd7	NA	NA	FALSE	FALSE	0.353607	NA	FALSE
1338	5.17872e-06	0.00019913	0.712295	0.709652	0.00264318	FALSE	-0.805201	2 vs 1	0.126582	3 vs 2	0.1	-0.0265823	Bcl7a:chr5:123359874-123360283:1, Bcl7a:chr5:123372499-123372861:1, Bcl7a:chr5:123373704-123374099:1	Bcl7a	4.24321e-05	0.0013035	FALSE	FALSE	0.00019913	0.00140108	FALSE
1339	0.76592	0.889691	0.659574	0.611111	0.0484634	TRUE	0.405465	1 vs 2	0.126478	1 vs 2	0.404255	0.277778	Rnf169:chr7:99920258-99920553:-1, Rnf169:chr7:99920085-99920810:-1, Rnf169:chr7:99922495-99922795:-1	Rnf169	NA	NA	FALSE	FALSE	0.889691	NA	FALSE
1340	0.0112194	0.0343927	0.632509	0.605923	0.0265863	FALSE	-1.26104	5 vs 3	0.126436	4 vs 2	0.586572	0.460137	Son:chr16:91662967-91663328:1, Son:chr16:91663649-91664058:1, Son:chr16:91665351-91665760:1, Son:chr16:91678698-91679255:1, Son:chr16:91679281-91679770:1	Son	0.0404215	0.106247	FALSE	FALSE	0.0343927	0.117563	FALSE
1341	0.46728	0.628461	0.637681	0.574468	0.0632131	TRUE	0.265209	2 vs 1	0.126426	2 vs 1	0.275362	0.148936	Vps18:chr2:119297757-119298296:1, Vps18:chr2:119298035-119298320:1	Vps18	NA	NA	FALSE	FALSE	0.628461	NA	FALSE
1342	0.00166558	0.00338274	0.544538	0.503964	0.0405741	FALSE	0.454045	2 vs 1	0.12632	2 vs 1	0.416807	0.290487	Tenm4:chr7:96906329-96906703:1, Tenm4:chr7:96908195-96908561:1, Tenm4:chr7:96910719-96911093:1	Tenm4	0.0079224	0.0157558	FALSE	FALSE	0.00338274	0.0172534	FALSE
1343	0.215049	0.087451	0.544239	0.518145	0.0260935	FALSE	-0.733732	3 vs 4	0.126062	1 vs 3	-0.547325	-0.673387	Kcmf1:chr6:72841092-72841449:-1, Kcmf1:chr6:72841715-72842159:-1, Kcmf1:chr6:72842438-72842860:-1, Kcmf1:chr6:72842383-72843177:-1, Kcmf1:chr6:72842882-72843172:-1	Kcmf1	0.387049	0.207653	FALSE	FALSE	0.215049	0.445172	FALSE
1344	0.218734	0.330721	0.8375	0.77451	0.0629902	TRUE	0.40579	2 vs 1	0.12598	2 vs 1	0.675	0.54902	Nudt1:chr5:140337553-140337806:1, Nudt1:chr5:140337773-140338137:1	Nudt1	NA	NA	FALSE	FALSE	0.330721	NA	FALSE
1345	9.59158e-05	1.26134e-05	0.399416	0.345932	0.0534836	FALSE	0.389196	2 vs 4	0.125815	2 vs 4	-0.0613057	-0.187121	Mrpl43:chr19:45004925-45005281:-1, Mrpl43:chr19:45005179-45005499:-1, Mrpl43:chr19:45005314-45005850:-1, Mrpl43:chr19:45005411-45005732:-1	Mrpl43	0.00061834	0.000107192	FALSE	FALSE	9.59158e-05	0.000722926	FALSE
1346	0.0959121	0.107816	0.365154	0.345609	0.0195445	FALSE	#NAME?	1 vs 2	0.125811	5 vs 6	-0.11215	-0.23796	Prpf40a:chr2:53134366-53134731:-1, Prpf40a:chr2:53134539-53134859:-1, Prpf40a:chr2:53135700-53136296:-1, Prpf40a:chr2:53136789-53137217:-1, Prpf40a:chr2:53137161-53137588:-1, Prpf40a:chr2:53138149-53138621:-1, Prpf40a:chr2:53138827-53139406:-1, Prpf40a:chr2:53138950-53139171:-1	Prpf40a	0.215781	0.245481	FALSE	FALSE	0.107816	0.275506	FALSE
1347	0.495014	NA	0.942857	0.88	0.0628571	TRUE	0.81093	1 vs 2	0.125714	1 vs 2	0.885714	0.76	Ncoa2:chr1:13139046-13139527:-1, Ncoa2:chr1:13141285-13141629:-1	Ncoa2	NA	NA	FALSE	FALSE	0.495014	NA	FALSE
1348	0.00918275	0.0983047	0.501987	0.439183	0.0628038	FALSE	0.252426	2 vs 1	0.125608	2 vs 1	0.00397351	-0.121634	Hnrnpl:chr7:28821810-28822037:1, Hnrnpl:chr7:28821912-28822263:1	Hnrnpl	0.0343003	0.228278	FALSE	FALSE	0.0983047	0.256144	FALSE
1349	0.104051	0.258321	0.606742	0.543939	0.0628022	TRUE	1.11241	2 vs 1	0.125604	3 vs 1	0.213483	0.0878788	Sorbs2:chr8:45777955-45778403:1, Sorbs2:chr8:45826125-45826325:1, Sorbs2:chr8:45827522-45827947:1	Sorbs2	NA	NA	FALSE	FALSE	0.258321	NA	FALSE
1350	0.144686	0.223759	0.358779	0.328125	0.0306536	TRUE	1.32176	3 vs 2	0.125477	3 vs 2	0.312977	0.1875	Ctdspl:chr9:119040550-119040932:1, Ctdspl:chr9:119043392-119044133:1, Ctdspl:chr9:119043775-119044124:1	Ctdspl	NA	NA	FALSE	FALSE	0.223759	NA	FALSE
1351	0.0113523	0.377425	0.278317	0.275042	0.00327471	FALSE	0.743611	3 vs 2	0.125384	3 vs 2	-0.236246	-0.36163	Gid8:chr2:180718054-180718614:1, Gid8:chr2:180718370-180718727:1, Gid8:chr2:180721216-180721652:1	Gid8	0.0407931	0.566769	FALSE	FALSE	0.377425	0.635715	FALSE
1352	0.406064	NA	0.159091	0.0964912	0.0625997	TRUE	0.571826	2 vs 1	0.125199	2 vs 1	-0.681818	-0.807018	Gatb:chr3:85653818-85654158:1, Gatb:chr3:85653505-85654530:1	Gatb	NA	NA	FALSE	FALSE	0.406064	NA	FALSE
1353	0.50005	NA	0.971429	0.929577	0.0418511	TRUE	Inf	2 vs 1	0.125151	3 vs 2	0.885714	0.760563	Rev3l:chr10:39874521-39874717:1, Rev3l:chr10:39874621-39874896:1, Rev3l:chr10:39874862-39875206:1	Rev3l	NA	NA	FALSE	FALSE	0.50005	NA	FALSE
1354	0.42549	0.394847	0.728571	0.694215	0.0343566	TRUE	1.24319	2 vs 3	0.125049	2 vs 3	0.27381	0.14876	Zbtb37:chr1:161002924-161003230:-1, Zbtb37:chr1:161003999-161004254:-1, Zbtb37:chr1:161008802-161009123:-1, Zbtb37:chr1:161009874-161010173:-1, Zbtb37:chr1:161018517-161019194:-1, Zbtb37:chr1:161019439-161020092:-1	Zbtb37	NA	NA	FALSE	FALSE	0.42549	NA	FALSE
1355	1	NA	1	0.9375	0.0625	TRUE	Inf	1 vs 2	0.125	1 vs 2	1	0.875	Lingo3:chr10:80832827-80833174:-1, Lingo3:chr10:80832801-80833553:-1	Lingo3	NA	NA	FALSE	FALSE	1	NA	FALSE
1356	0.751219	0.57182	0.8125	0.75	0.0625	TRUE	0.510826	2 vs 1	0.125	3 vs 1	0.625	0.5	Srxn1:chr2:152109368-152109993:1, Srxn1:chr2:152110229-152110609:1, Srxn1:chr2:152110971-152111376:1	Srxn1	NA	NA	FALSE	FALSE	0.751219	NA	FALSE
1357	1	NA	1	0.9375	0.0625	TRUE	Inf	1 vs 2	0.125	1 vs 2	1	0.875	Tfpi:chr2:84432864-84433193:-1, Tfpi:chr2:84440695-84441063:-1	Tfpi	NA	NA	FALSE	FALSE	1	NA	FALSE
1358	0.425002	0.58855	0.42155	0.347826	0.073724	TRUE	1.87584	4 vs 1	0.124764	4 vs 1	0.0812854	-0.0434783	Rad51:chr2:119134960-119135446:1, Rad51:chr2:119135313-119135782:1, Rad51:chr2:119135604-119135939:1, Rad51:chr2:119135727-119136062:1	Rad51	NA	NA	FALSE	FALSE	0.58855	NA	FALSE
1359	0.87716	NA	0.210526	0.148148	0.0623782	TRUE	0.427444	1 vs 2	0.124756	1 vs 2	-0.578947	-0.703704	Fan1:chr7:64342884-64343172:-1, Fan1:chr7:64344738-64345318:-1	Fan1	NA	NA	FALSE	FALSE	0.87716	NA	FALSE
1360	0.014705	0.0939869	0.125	0.0626506	0.0623494	FALSE	0.759573	1 vs 2	0.124699	1 vs 2	-0.75	-0.874699	Ftsj1:chrX:8238447-8238687:-1, Ftsj1:chrX:8240392-8240776:-1	Ftsj1	0.0502026	0.221868	FALSE	FALSE	0.0939869	0.249193	FALSE
1361	0.55865	0.39994	0.719481	0.631633	0.0878479	TRUE	#NAME?	1 vs 3	0.124675	1 vs 7	0.381818	0.257143	Senp5:chr16:31959670-31959982:-1, Senp5:chr16:31959786-31960148:-1, Senp5:chr16:31960037-31960218:-1, Senp5:chr16:31962328-31962660:-1, Senp5:chr16:31962484-31962892:-1, Senp5:chr16:31962704-31962955:-1, Senp5:chr16:31963159-31963466:-1, Senp5:chr16:31962973-31963857:-1	Senp5	NA	NA	FALSE	FALSE	0.55865	NA	FALSE
1362	0.522479	NA	0.958333	0.896104	0.0622294	TRUE	0.980829	1 vs 2	0.124459	1 vs 2	0.916667	0.792208	Nxph4:chr10:127525464-127525797:-1, Nxph4:chr10:127525464-127526082:-1	Nxph4	NA	NA	FALSE	FALSE	0.522479	NA	FALSE
1363	0.561148	NA	0.585714	0.554878	0.0308362	TRUE	0.366679	3 vs 2	0.12439	3 vs 2	-0.4	-0.52439	Slc35f6:chr5:30658077-30658620:1, Slc35f6:chr5:30658238-30658658:1, Slc35f6:chr5:30659286-30659729:1	Slc35f6	NA	NA	FALSE	FALSE	0.561148	NA	FALSE
1364	0.449326	0.646352	0.812165	0.75	0.0621646	TRUE	0.365525	2 vs 1	0.124329	2 vs 1	0.624329	0.5	Sfrp2:chr3:83773302-83773752:1, Sfrp2:chr3:83773904-83774316:1	Sfrp2	NA	NA	FALSE	FALSE	0.646352	NA	FALSE
1365	0.1554	NA	0.984127	0.921986	0.0621412	TRUE	1.6575	2 vs 1	0.124282	2 vs 1	0.968254	0.843972	Fuca2:chr10:13514794-13515706:1, Fuca2:chr10:13515163-13515641:1	Fuca2	NA	NA	FALSE	FALSE	0.1554	NA	FALSE
1366	0.449595	NA	0.842105	0.78	0.0621053	TRUE	Inf	1 vs 3	0.124211	1 vs 3	0.684211	0.56	L3hypdh:chr12:72073429-72073791:-1, L3hypdh:chr12:72073469-72073962:-1, L3hypdh:chr12:72073880-72074055:-1	L3hypdh	NA	NA	FALSE	FALSE	0.449595	NA	FALSE
1367	5.09565e-06	2.74042e-05	0.538091	0.517773	0.0203177	FALSE	0.995654	3 vs 1	0.123842	3 vs 2	0.0466418	-0.0772004	Sfpq:chr4:127029789-127029939:1, Sfpq:chr4:127029844-127030339:1, Sfpq:chr4:127030384-127030823:1, Sfpq:chr4:127030816-127031283:1	Sfpq	4.18866e-05	0.000216905	FALSE	FALSE	2.74042e-05	0.000232799	FALSE
1368	0.0491813	0.0208701	0.186469	0.147651	0.0388176	FALSE	0.542109	2 vs 1	0.12384	2 vs 1	-0.580858	-0.704698	Rab22a:chr2:173701800-173702210:1, Rab22a:chr2:173704325-173704644:1, Rab22a:chr2:173706977-173707333:1	Rab22a	0.131219	0.0722106	FALSE	FALSE	0.0491813	0.153654	FALSE
1369	0.486649	0.748016	0.22807	0.181992	0.0460778	TRUE	#NAME?	3 vs 1	0.123714	4 vs 2	-0.157895	-0.281609	Slc36a4:chr9:15738200-15738600:1, Slc36a4:chr9:15742022-15742391:1, Slc36a4:chr9:15741823-15742598:1, Slc36a4:chr9:15743232-15743508:1	Slc36a4	NA	NA	FALSE	FALSE	0.748016	NA	FALSE
1370	0.2044	NA	0.917976	0.860465	0.0575105	TRUE	1.30221	1 vs 4	0.123706	1 vs 4	0.774869	0.651163	Scpep1:chr11:88924014-88924304:-1, Scpep1:chr11:88924045-88924561:-1, Scpep1:chr11:88924253-88924370:-1, Scpep1:chr11:88924277-88924724:-1	Scpep1	NA	NA	FALSE	FALSE	0.2044	NA	FALSE
1371	3.63968e-05	0.00672348	0.328493	0.266753	0.0617404	FALSE	0.296152	2 vs 1	0.123481	2 vs 1	-0.343014	-0.466495	1810037I17Rik:chr3:122925435-122925755:1, 1810037I17Rik:chr3:122925752-122926200:1	1810037I17Rik	0.0002568	0.027884	FALSE	FALSE	0.00672348	0.0307705	FALSE
1372	0.00521012	0.00240727	0.69177	0.731303	-0.039533	TRUE	-2.42037	7 vs 8	0.123381	2 vs 3	0.380435	0.257053	Srcin1:chr11:97509333-97509689:-1, Srcin1:chr11:97510801-97511261:-1, Srcin1:chr11:97511385-97511878:-1, Srcin1:chr11:97511949-97512184:-1, Srcin1:chr11:97516554-97516794:-1, Srcin1:chr11:97516599-97517042:-1, Srcin1:chr11:97518456-97518818:-1, Srcin1:chr11:97519318-97519593:-1	Srcin1	NA	NA	FALSE	FALSE	0.00521012	NA	FALSE
1373	0.844108	0.96937	0.472222	0.417778	0.0544444	TRUE	0.450201	1 vs 3	0.123333	1 vs 3	-0.25	-0.373333	Ubash3b:chr9:41013620-41013947:-1, Ubash3b:chr9:41013364-41014400:-1, Ubash3b:chr9:41014054-41014436:-1, Ubash3b:chr9:41014725-41015061:-1	Ubash3b	NA	NA	FALSE	FALSE	0.96937	NA	FALSE
1374	1	0.957295	0.461538	0.4	0.0615385	TRUE	0.251314	2 vs 1	0.123077	2 vs 1	-0.0769231	-0.2	Slc7a10:chr7:35200646-35200939:1, Slc7a10:chr7:35200795-35201126:1	Slc7a10	NA	NA	FALSE	FALSE	1	NA	FALSE
1375	0.000648842	0.00323886	0.565018	0.514118	0.0508999	FALSE	0.526182	3 vs 4	0.122979	1 vs 4	0.108516	-0.0144628	2610001J05Rik:chr6:13869783-13870121:-1, 2610001J05Rik:chr6:13869879-13870227:-1, 2610001J05Rik:chr6:13869996-13870258:-1, 2610001J05Rik:chr6:13870015-13870533:-1	2610001J05Rik	0.00339107	0.0151439	FALSE	FALSE	0.00323886	0.0165861	FALSE
1376	0.234254	0.345497	0.694118	0.691919	0.00219846	TRUE	0.973861	3 vs 1	0.122816	3 vs 1	0.0470588	-0.0757576	Larp4:chr15:100010422-100010684:1, Larp4:chr15:100011812-100012199:1, Larp4:chr15:100013996-100014359:1, Larp4:chr15:100015952-100016358:1	Larp4	NA	NA	FALSE	FALSE	0.345497	NA	FALSE
1377	1	NA	0.666667	0.605263	0.0614035	TRUE	0.265703	1 vs 2	0.122807	1 vs 2	0.333333	0.210526	Slitrk4:chrX:64269435-64269837:-1, Slitrk4:chrX:64269648-64270390:-1	Slitrk4	NA	NA	FALSE	FALSE	1	NA	FALSE
1378	0.0576225	0.153702	0.282297	0.22096	0.0613371	FALSE	0.326985	1 vs 2	0.122674	1 vs 2	-0.435407	-0.558081	Tmsb15b2:chrX:136954988-136955541:-1, Tmsb15b2:chrX:136955256-136955540:-1	Tmsb15b2	0.14859	0.315491	FALSE	FALSE	0.153702	0.353305	FALSE
1379	0.31948	NA	1	0.938697	0.0613027	TRUE	Inf	2 vs 1	0.122605	2 vs 1	1	0.877395	Syp:chrX:7651788-7651943:1, Syp:chrX:7652860-7653256:1	Syp	NA	NA	FALSE	FALSE	0.31948	NA	FALSE
1380	0.389031	0.432649	0.490637	0.486434	0.0042026	TRUE	-1.64866	7 vs 5	0.12255	5 vs 4	-0.179775	-0.302326	Foxp2:chr6:15437960-15438270:1, Foxp2:chr6:15438643-15439044:1, Foxp2:chr6:15438975-15439468:1, Foxp2:chr6:15439722-15440117:1, Foxp2:chr6:15440463-15441074:1, Foxp2:chr6:15441170-15441367:1, Foxp2:chr6:15441556-15442051:1	Foxp2	NA	NA	FALSE	FALSE	0.432649	NA	FALSE
1381	0.0862261	0.125168	0.371921	0.310811	0.0611104	FALSE	0.272348	2 vs 1	0.122221	2 vs 1	-0.256158	-0.378378	Fxr1:chr3:34069026-34069306:1, Fxr1:chr3:34069612-34069968:1	Fxr1	0.199648	0.27269	FALSE	FALSE	0.125168	0.306068	FALSE
1382	0.0379727	0.0438795	0.744565	0.720654	0.0239114	FALSE	-0.679062	2 vs 1	0.122075	4 vs 2	0.226087	0.104012	Msl1:chr11:98800181-98800468:1, Msl1:chr11:98800679-98801074:1, Msl1:chr11:98805237-98805634:1, Msl1:chr11:98806060-98806448:1, Msl1:chr11:98807505-98807859:1	Msl1	0.108007	0.127125	FALSE	FALSE	0.0438795	0.14198	FALSE
1383	0.320247	0.943283	0.770161	0.739669	0.0304919	TRUE	0.244333	1 vs 2	0.121967	1 vs 2	0.0806452	-0.0413223	Brd1:chr15:88687027-88687358:-1, Brd1:chr15:88687071-88687778:-1, Brd1:chr15:88687348-88687569:-1	Brd1	NA	NA	FALSE	FALSE	0.943283	NA	FALSE
1384	0.663037	0.81528	0.446512	0.397633	0.0488785	TRUE	1.14176	2 vs 5	0.121967	4 vs 5	-0.0930233	-0.21499	Rabgap1l:chr1:160219169-160219523:-1, Rabgap1l:chr1:160220837-160221204:-1, Rabgap1l:chr1:160223489-160223908:-1, Rabgap1l:chr1:160223783-160224267:-1, Rabgap1l:chr1:160256524-160256933:-1, Rabgap1l:chr1:160256986-160257387:-1	Rabgap1l	NA	NA	FALSE	FALSE	0.81528	NA	FALSE
1385	0.245065	0.455591	0.55015	0.48587	0.0642801	TRUE	1.39586	9 vs 8	0.121895	9 vs 2	0.0958084	-0.026087	Tmx3:chr18:90537046-90537275:1, Tmx3:chr18:90540159-90540718:1, Tmx3:chr18:90541343-90541591:1, Tmx3:chr18:90541205-90542215:1, Tmx3:chr18:90541661-90541944:1, Tmx3:chr18:90541673-90542320:1, Tmx3:chr18:90541925-90542171:1, Tmx3:chr18:90542522-90543244:1, Tmx3:chr18:90542892-90543252:1	Tmx3	NA	NA	FALSE	FALSE	0.455591	NA	FALSE
1386	0.119187	0.0821265	0.177966	0.125458	0.0525082	FALSE	0.642957	4 vs 1	0.12181	2 vs 1	-0.466102	-0.587912	Mkln1:chr6:31507571-31507992:1, Mkln1:chr6:31511335-31512027:1, Mkln1:chr6:31512819-31513251:1, Mkln1:chr6:31516451-31516811:1	Mkln1	0.252418	0.199109	FALSE	FALSE	0.119187	0.295185	FALSE
1387	0.653286	0.705298	0.778846	0.755208	0.0236378	TRUE	2.30259	4 vs 3	0.121795	4 vs 3	0.0384615	-0.0833333	Abhd2:chr7:79360048-79360296:1, Abhd2:chr7:79360108-79360607:1, Abhd2:chr7:79360373-79360670:1, Abhd2:chr7:79360642-79360854:1, Abhd2:chr7:79365156-79365512:1	Abhd2	NA	NA	FALSE	FALSE	0.705298	NA	FALSE
1388	0.967227	NA	0.8	0.73913	0.0608696	TRUE	0.34484	1 vs 2	0.121739	1 vs 2	0.6	0.478261	Angel1:chr12:86700502-86700804:-1, Angel1:chr12:86700684-86700884:-1	Angel1	NA	NA	FALSE	FALSE	0.967227	NA	FALSE
1389	0.0859255	0.0152093	0.448437	0.486111	-0.0376736	TRUE	1.48734	6 vs 8	0.121682	6 vs 7	0.15625	0.0345679	Zfp81:chr17:33329385-33329617:-1, Zfp81:chr17:33330760-33331126:-1, Zfp81:chr17:33331457-33331738:-1, Zfp81:chr17:33331632-33332001:-1, Zfp81:chr17:33331827-33332371:-1, Zfp81:chr17:33332453-33332912:-1, Zfp81:chr17:33333686-33334039:-1, Zfp81:chr17:33333873-33334240:-1, Zfp81:chr17:33334226-33334463:-1	Zfp81	NA	NA	FALSE	FALSE	0.0859255	NA	FALSE
1390	0.884181	NA	0.58	0.519231	0.0607692	TRUE	0.310155	1 vs 3	0.121538	1 vs 3	0.16	0.0384615	Kcnb1:chr2:167095969-167096321:-1, Kcnb1:chr2:167098752-167099106:-1, Kcnb1:chr2:167103533-167103961:-1	Kcnb1	NA	NA	FALSE	FALSE	0.884181	NA	FALSE
1391	0.0967501	0.0811726	0.422454	0.464822	-0.0423681	FALSE	-1.30833	8 vs 5	0.121413	9 vs 8	-0.101852	-0.223265	Mtf2:chr5:108106615-108107046:1, Mtf2:chr5:108106840-108107217:1, Mtf2:chr5:108106793-108107684:1, Mtf2:chr5:108107184-108107499:1, Mtf2:chr5:108107864-108108102:1, Mtf2:chr5:108107731-108108299:1, Mtf2:chr5:108107540-108108653:1, Mtf2:chr5:108108575-108109069:1, Mtf2:chr5:108111304-108112193:1	Mtf2	0.216898	0.197361	FALSE	FALSE	0.0967501	0.254132	FALSE
1392	0.228018	0.391656	0.251969	0.191304	0.0606642	FALSE	0.353416	2 vs 1	0.121328	2 vs 1	-0.496063	-0.617391	Nsun5:chr5:135375808-135376153:1, Nsun5:chr5:135376467-135376793:1	Nsun5	0.402757	0.578057	FALSE	FALSE	0.391656	0.64791	FALSE
1393	0.856407	NA	0.603175	0.585859	0.017316	TRUE	0.635989	3 vs 4	0.121212	3 vs 4	0	-0.121212	Hint3:chr10:30603174-30603519:-1, Hint3:chr10:30605195-30605567:-1, Hint3:chr10:30607154-30607523:-1, Hint3:chr10:30607892-30608269:-1	Hint3	NA	NA	FALSE	FALSE	0.856407	NA	FALSE
1394	0.118334	NA	0.987179	0.926606	0.060574	TRUE	1.80813	2 vs 1	0.121148	2 vs 1	0.974359	0.853211	Mllt6:chr11:97682191-97682498:1, Mllt6:chr11:97685072-97685463:1	Mllt6	NA	NA	FALSE	FALSE	0.118334	NA	FALSE
1395	0.226914	0.265451	0.646465	0.585938	0.0605271	TRUE	0.256339	2 vs 1	0.121054	2 vs 1	0.292929	0.171875	Smco4:chr9:15544773-15545260:1, Smco4:chr9:15544984-15545258:1	Smco4	NA	NA	FALSE	FALSE	0.265451	NA	FALSE
1396	0.648288	0.799436	0.838235	0.777778	0.0604575	TRUE	0.628609	2 vs 3	0.120915	1 vs 3	0.676471	0.555556	Prkd1:chr12:50341220-50341601:-1, Prkd1:chr12:50341741-50341987:-1, Prkd1:chr12:50341492-50342365:-1	Prkd1	NA	NA	FALSE	FALSE	0.799436	NA	FALSE
1397	0.570816	NA	0.242254	0.181818	0.0604353	TRUE	0.363713	1 vs 2	0.120871	1 vs 2	-0.515493	-0.636364	Shmt1:chr11:60788113-60788381:-1, Shmt1:chr11:60788861-60789272:-1	Shmt1	NA	NA	FALSE	FALSE	0.570816	NA	FALSE
1398	0.480128	0.474878	0.384615	0.335456	0.0491589	TRUE	0.524524	3 vs 4	0.120747	3 vs 4	-0.376068	-0.496815	Kctd1:chr18:14968648-14969026:-1, Kctd1:chr18:14968716-14969157:-1, Kctd1:chr18:14968947-14969461:-1, Kctd1:chr18:14969352-14969765:-1	Kctd1	NA	NA	FALSE	FALSE	0.480128	NA	FALSE
1399	0.128717	NA	0.95098	0.890625	0.0603554	FALSE	0.868132	1 vs 2	0.120711	1 vs 2	0.901961	0.78125	Gorab:chr1:163384903-163385229:-1, Gorab:chr1:163385039-163385788:-1	Gorab	0.267422	NA	FALSE	FALSE	0.128717	0.310486	FALSE
1400	0.400532	0.489628	0.656566	0.596273	0.0602924	TRUE	0.258066	2 vs 1	0.120585	2 vs 1	0.313131	0.192547	Zfp143:chr7:110094399-110094860:1, Zfp143:chr7:110095053-110095399:1	Zfp143	NA	NA	FALSE	FALSE	0.489628	NA	FALSE
1401	0.655686	NA	0.272727	0.2125	0.0602273	TRUE	0.329092	1 vs 2	0.120455	1 vs 2	-0.454545	-0.575	Zfp287:chr11:62711236-62711618:-1, Zfp287:chr11:62711428-62711916:-1	Zfp287	NA	NA	FALSE	FALSE	0.655686	NA	FALSE
1402	0.529162	NA	0.820225	0.76	0.0602247	TRUE	0.365191	2 vs 1	0.120449	2 vs 1	0.640449	0.52	Sp1:chr15:102430850-102431163:1, Sp1:chr15:102436030-102436386:1	Sp1	NA	NA	FALSE	FALSE	0.529162	NA	FALSE
1403	0.135866	NA	1	0.94	0.06	TRUE	Inf	2 vs 1	0.12	2 vs 1	1	0.88	Morc3:chr16:93875460-93875691:1, Morc3:chr16:93875810-93876037:1	Morc3	NA	NA	FALSE	FALSE	0.135866	NA	FALSE
1404	0.446643	NA	0.938776	0.878788	0.0599876	TRUE	0.749028	2 vs 1	0.119975	2 vs 1	0.877551	0.757576	Fam221a:chr6:49388758-49389115:1, Fam221a:chr6:49388889-49389296:1	Fam221a	NA	NA	FALSE	FALSE	0.446643	NA	FALSE
1405	0.316637	0.444169	0.436275	0.376289	0.0599859	TRUE	0.68016	1 vs 3	0.119972	1 vs 3	-0.127451	-0.247423	Senp1:chr15:98038721-98039084:-1, Senp1:chr15:98041203-98041572:-1, Senp1:chr15:98041957-98042312:-1	Senp1	NA	NA	FALSE	FALSE	0.444169	NA	FALSE
1406	0.115592	NA	0.979167	0.919192	0.0599747	TRUE	1.41873	1 vs 2	0.119949	1 vs 2	0.958333	0.838384	Tbccd1:chr16:22813214-22813614:-1, Tbccd1:chr16:22813385-22813912:-1	Tbccd1	NA	NA	FALSE	FALSE	0.115592	NA	FALSE
1407	0.148232	0.24141	0.694981	0.635015	0.0599659	FALSE	0.269717	2 vs 1	0.119932	2 vs 1	0.389961	0.27003	M6pr:chr6:122316405-122316806:1, M6pr:chr6:122317261-122317680:1	M6pr	0.295998	0.425852	FALSE	FALSE	0.24141	0.485111	FALSE
1408	0.0248453	0.0265196	0.195918	0.129785	0.0661331	FALSE	1.03358	4 vs 2	0.119648	3 vs 1	-0.591837	-0.711485	Ppig:chr2:69750265-69750598:1, Ppig:chr2:69751365-69751773:1, Ppig:chr2:69753054-69753496:1, Ppig:chr2:69753571-69754078:1	Ppig	0.0764009	0.0872697	FALSE	FALSE	0.0265196	0.096366	FALSE
1409	0.0622558	0.152237	0.132979	0.0732759	0.0597029	FALSE	0.66255	1 vs 2	0.119406	1 vs 2	-0.734043	-0.853448	Eefsec:chr6:88257321-88257680:-1, Eefsec:chr6:88257833-88258244:-1	Eefsec	0.1575	0.314337	FALSE	FALSE	0.152237	0.351896	FALSE
1410	1	NA	0.0597015	0	0.0597015	TRUE	Inf	2 vs 1	0.119403	2 vs 1	-0.880597	-1	Ccne2:chr4:11204015-11204498:1, Ccne2:chr4:11203876-11204779:1	Ccne2	NA	NA	FALSE	FALSE	1	NA	FALSE
1411	0.430741	NA	1	0.940299	0.0597015	TRUE	Inf	1 vs 2	0.119403	1 vs 2	1	0.880597	Pdk2:chr11:95026250-95026523:-1, Pdk2:chr11:95026250-95026738:-1	Pdk2	NA	NA	FALSE	FALSE	0.430741	NA	FALSE
1412	8.64413e-14	4.54354e-13	0.555135	0.49546	0.059675	FALSE	1.54438	1 vs 3	0.11935	1 vs 3	0.110269	-0.00908059	Mrpl15:chr1:4774283-4774604:-1, Mrpl15:chr1:4776339-4776729:-1, Mrpl15:chr1:4781367-4781758:-1	Mrpl15	1.77065e-12	9.24745e-12	FALSE	FALSE	4.54354e-13	9.86376e-12	FALSE
1413	2.96491e-30	4.26235e-29	0.515989	0.47329	0.0426995	FALSE	0.653815	5 vs 3	0.1193	5 vs 3	0.070314	-0.0489865	Nap1l1:chr10:111494665-111494966:1, Nap1l1:chr10:111494638-111495477:1, Nap1l1:chr10:111495306-111495423:1, Nap1l1:chr10:111496001-111496139:1, Nap1l1:chr10:111496390-111496904:1, Nap1l1:chr10:111496565-111496896:1, Nap1l1:chr10:111497750-111498183:1	Nap1l1	1.39461e-28	2.10682e-27	FALSE	FALSE	4.26235e-29	2.20946e-27	FALSE
1414	0.68905	0.437886	0.533333	0.473684	0.0596491	TRUE	0.238892	1 vs 2	0.119298	1 vs 2	0.0666667	-0.0526316	Rell1:chr5:63909066-63909352:-1, Rell1:chr5:63908992-63909559:-1	Rell1	NA	NA	FALSE	FALSE	0.68905	NA	FALSE
1415	0.504922	0.412111	0.794326	0.734694	0.0596324	TRUE	0.332633	1 vs 2	0.119265	1 vs 2	0.588652	0.469388	Il11ra2:chr4:42655948-42656423:-1, Il11ra2:chr4:42656082-42656290:-1	Il11ra2	NA	NA	FALSE	FALSE	0.504922	NA	FALSE
1416	0.163587	0.107908	0.26455	0.201968	0.0625819	FALSE	0.381427	3 vs 1	0.119211	4 vs 1	-0.484127	-0.603338	Mpg:chr11:32231618-32232071:1, Mpg:chr11:32232049-32232381:1, Mpg:chr11:32232133-32232464:1, Mpg:chr11:32232311-32232702:1	Mpg	0.319378	0.245481	FALSE	FALSE	0.163587	0.36989	FALSE
1417	0.0630185	NA	0.972477	0.912903	0.0595738	FALSE	1.21522	2 vs 1	0.119148	2 vs 1	0.944954	0.825806	Plscr3:chr11:69850247-69850783:1, Plscr3:chr11:69850636-69851100:1	Plscr3	0.15893	NA	FALSE	FALSE	0.0630185	0.184197	FALSE
1418	0.750804	NA	0.347826	0.288288	0.0595378	TRUE	0.275103	1 vs 2	0.119076	1 vs 2	-0.304348	-0.423423	Dusp23:chr1:172630714-172631125:-1, Dusp23:chr1:172631400-172631717:-1	Dusp23	NA	NA	FALSE	FALSE	0.750804	NA	FALSE
1419	0.164957	0.376478	0.295455	0.235925	0.0595296	FALSE	0.306115	1 vs 2	0.119059	1 vs 2	-0.409091	-0.52815	Wdr73:chr7:80890722-80891088:-1, Wdr73:chr7:80891217-80891643:-1	Wdr73	0.32129	0.566769	FALSE	FALSE	0.376478	0.635376	FALSE
1420	0.358736	0.451358	0.775862	0.756173	0.0196892	TRUE	-0.409572	2 vs 3	0.118987	1 vs 2	0.310345	0.191358	Mthfd2:chr6:83305686-83306079:-1, Mthfd2:chr6:83305910-83306351:-1, Mthfd2:chr6:83305874-83306812:-1	Mthfd2	NA	NA	FALSE	FALSE	0.451358	NA	FALSE
1421	0.170139	0.34016	0.379433	0.34188	0.0375523	TRUE	1.42612	4 vs 3	0.118931	4 vs 3	-0.329787	-0.448718	Itga6:chr2:71856424-71856763:1, Itga6:chr2:71857960-71858170:1, Itga6:chr2:71857784-71858339:1, Itga6:chr2:71858127-71858377:1	Itga6	NA	NA	FALSE	FALSE	0.34016	NA	FALSE
1422	0.608647	0.69404	0.911765	0.852459	0.0593057	TRUE	0.581356	1 vs 2	0.118611	1 vs 2	0.823529	0.704918	Osbpl1a:chr18:12755283-12755711:-1, Osbpl1a:chr18:12756237-12756340:-1	Osbpl1a	NA	NA	FALSE	FALSE	0.69404	NA	FALSE
1423	0.390309	0.37713	0.726908	0.666667	0.060241	TRUE	#NAME?	3 vs 1	0.118551	6 vs 5	-0.0722892	-0.19084	Polr3f:chr2:144538538-144538908:1, Polr3f:chr2:144538811-144539357:1, Polr3f:chr2:144539371-144539618:1, Polr3f:chr2:144539136-144539494:1, Polr3f:chr2:144539513-144540222:1, Polr3f:chr2:144541313-144541971:1, Polr3f:chr2:144541653-144541994:1	Polr3f	NA	NA	FALSE	FALSE	0.390309	NA	FALSE
1424	0.0435688	0.231203	0.609848	0.550578	0.0592705	FALSE	0.71879	3 vs 1	0.118541	3 vs 1	0.219697	0.101156	Gnpat:chr8:124889199-124889553:1, Gnpat:chr8:124889485-124890019:1, Gnpat:chr8:124889752-124890056:1	Gnpat	0.119251	0.414208	FALSE	FALSE	0.231203	0.471691	FALSE
1425	0.464537	NA	0.787234	0.728261	0.0589732	TRUE	0.753772	2 vs 1	0.117946	3 vs 1	0.574468	0.456522	Gan:chr8:117204862-117205172:1, Gan:chr8:117215470-117216018:1, Gan:chr8:117215715-117215964:1	Gan	NA	NA	FALSE	FALSE	0.464537	NA	FALSE
1426	0.343777	0.311372	0.413462	0.399123	0.0143387	TRUE	0.615186	1 vs 2	0.117578	1 vs 2	0.240385	0.122807	Rhot2:chr17:25838410-25838810:-1, Rhot2:chr17:25838672-25839320:-1, Rhot2:chr17:25838843-25839133:-1	Rhot2	NA	NA	FALSE	FALSE	0.343777	NA	FALSE
1427	0.0166003	NA	0.399225	0.373786	0.0254384	FALSE	2.45674	4 vs 3	0.117408	4 vs 3	0.0348837	-0.0825243	B230217C12Rik:chr11:97841757-97841860:1, B230217C12Rik:chr11:97842621-97843099:1, B230217C12Rik:chr11:97842930-97843579:1, B230217C12Rik:chr11:97845162-97845373:1	B230217C12Rik	0.0552619	NA	FALSE	FALSE	0.0166003	0.0659037	FALSE
1428	0.372769	0.584491	0.743902	0.685246	0.0586565	TRUE	0.288365	2 vs 1	0.117313	2 vs 1	0.487805	0.370492	Mtmr4:chr11:87614825-87615189:1, Mtmr4:chr11:87615920-87616303:1	Mtmr4	NA	NA	FALSE	FALSE	0.584491	NA	FALSE
1429	6.90863e-05	0.00031408	0.217972	0.153571	0.0644009	FALSE	Inf	8 vs 1	0.117122	6 vs 1	-0.529032	-0.646154	Polr1f:chr12:33437896-33438315:1, Polr1f:chr12:33438058-33438277:1, Polr1f:chr12:33438131-33438370:1, Polr1f:chr12:33439009-33439422:1, Polr1f:chr12:33439949-33440256:1, Polr1f:chr12:33440086-33440426:1, Polr1f:chr12:33440264-33440492:1, Polr1f:chr12:33440346-33440536:1	Polr1f	0.000456977	0.00193551	FALSE	FALSE	0.00031408	0.00208811	FALSE
1430	0.0244503	0.0660873	0.929496	0.870968	0.0585287	FALSE	0.669437	1 vs 2	0.117057	1 vs 2	0.858993	0.741935	Efhd2:chr4:141858271-141858801:-1, Efhd2:chr4:141859599-141859943:-1	Efhd2	0.0755519	0.169559	FALSE	FALSE	0.0660873	0.191405	FALSE
1431	0.0364067	NA	0.899371	0.840909	0.058462	TRUE	1.41447	2 vs 1	0.116924	3 vs 1	0.798742	0.681818	9430015G10Rik:chr4:156125490-156125962:1, 9430015G10Rik:chr4:156126062-156126430:1, 9430015G10Rik:chr4:156126844-156127266:1	9430015G10Rik	NA	NA	FALSE	FALSE	0.0364067	NA	FALSE
1432	0.352783	0.627136	0.911111	0.872146	0.038965	FALSE	0.552375	1 vs 3	0.116895	1 vs 3	0.733333	0.616438	Ralb:chr1:119470284-119470650:-1, Ralb:chr1:119471160-119471431:-1, Ralb:chr1:119470998-119471786:-1, Ralb:chr1:119471417-119471605:-1	Ralb	0.540635	0.771117	FALSE	FALSE	0.627136	0.839707	FALSE
1433	0.834446	NA	0.732143	0.694444	0.0376984	TRUE	#NAME?	3 vs 1	0.116883	5 vs 3	0.571429	0.454545	Skil:chr3:31118748-31119390:1, Skil:chr3:31119176-31119451:1, Skil:chr3:31121904-31122158:1, Skil:chr3:31122041-31122571:1, Skil:chr3:31122265-31122590:1	Skil	NA	NA	FALSE	FALSE	0.834446	NA	FALSE
1434	0.362312	0.333977	0.939474	0.882075	0.0573982	FALSE	Inf	1 vs 3	0.116783	1 vs 4	0.852632	0.735849	Ccdc97:chr7:25711090-25711452:-1, Ccdc97:chr7:25712522-25712693:-1, Ccdc97:chr7:25712669-25712864:-1, Ccdc97:chr7:25712709-25713087:-1, Ccdc97:chr7:25712908-25713149:-1	Ccdc97	0.551723	0.523895	FALSE	FALSE	0.362312	0.621806	FALSE
1435	0.00293727	0.0109636	0.941304	0.883028	0.0582768	FALSE	0.753483	2 vs 1	0.116554	2 vs 1	0.882609	0.766055	Septin9:chr11:117360343-117360647:1, Septin9:chr11:117361924-117362337:1	Septin9	0.0130204	0.0420154	FALSE	FALSE	0.0109636	0.0470396	FALSE
1436	0.293998	0.00541536	0.879397	0.834821	0.0445756	FALSE	0.817678	5 vs 3	0.116552	5 vs 4	0.718593	0.602041	Zkscan1:chr5:138103808-138104422:1, Zkscan1:chr5:138104059-138104526:1, Zkscan1:chr5:138104446-138104602:1, Zkscan1:chr5:138106784-138107216:1, Zkscan1:chr5:138107437-138107822:1	Zkscan1	0.479398	0.023051	FALSE	FALSE	0.293998	0.545077	FALSE
1437	0.970615	NA	0.715789	0.661039	0.0547505	TRUE	1.22378	5 vs 2	0.116541	6 vs 2	0.473684	0.357143	Negr1:chr3:157172140-157172650:1, Negr1:chr3:157199762-157200279:1, Negr1:chr3:157315206-157315589:1, Negr1:chr3:157315729-157316233:1, Negr1:chr3:157315932-157316224:1, Negr1:chr3:157316039-157316464:1	Negr1	NA	NA	FALSE	FALSE	0.970615	NA	FALSE
1438	0.000729284	0.00232269	0.476879	0.45729	0.0195895	FALSE	0.329561	2 vs 3	0.116524	2 vs 3	0.224424	0.1079	Marcks:chr10:37133229-37133507:-1, Marcks:chr10:37133273-37133797:-1, Marcks:chr10:37134788-37135171:-1, Marcks:chr10:37135444-37135784:-1	Marcks	0.00373464	0.0114807	FALSE	FALSE	0.00232269	0.0124203	FALSE
1439	0.474502	0.326479	0.69697	0.659459	0.0375102	TRUE	0.796997	1 vs 3	0.116462	1 vs 3	0.127273	0.0108108	Map3k12:chr15:102498663-102499208:-1, Map3k12:chr15:102499387-102499796:-1, Map3k12:chr15:102499365-102500268:-1, Map3k12:chr15:102500049-102500274:-1	Map3k12	NA	NA	FALSE	FALSE	0.474502	NA	FALSE
1440	0.246591	0.366094	0.522876	0.484848	0.0380273	TRUE	-1.63761	2 vs 3	0.116399	3 vs 4	-0.27451	-0.390909	Crtc3:chr7:80586625-80586972:-1, Crtc3:chr7:80586870-80587007:-1, Crtc3:chr7:80587279-80587718:-1, Crtc3:chr7:80588241-80588437:-1	Crtc3	NA	NA	FALSE	FALSE	0.366094	NA	FALSE
1441	0.454051	NA	0.95	0.891813	0.0581871	TRUE	Inf	2 vs 1	0.116374	3 vs 1	0.9	0.783626	Fam174b:chr7:73775610-73775957:1, Fam174b:chr7:73776383-73776830:1, Fam174b:chr7:73776588-73776918:1	Fam174b	NA	NA	FALSE	FALSE	0.454051	NA	FALSE
1442	0.249791	0.462968	0.426966	0.372659	0.0543071	TRUE	0.745749	2 vs 1	0.116105	2 vs 1	-0.438202	-0.554307	Ssh2:chr11:77457054-77457390:1, Ssh2:chr11:77459598-77460220:1, Ssh2:chr11:77459879-77460220:1	Ssh2	NA	NA	FALSE	FALSE	0.462968	NA	FALSE
1443	0.360166	0.854509	0.335329	0.277311	0.0580184	TRUE	0.273661	1 vs 2	0.116037	1 vs 2	-0.329341	-0.445378	Agfg2:chr5:137650535-137650718:-1, Agfg2:chr5:137650824-137651386:-1	Agfg2	NA	NA	FALSE	FALSE	0.854509	NA	FALSE
1444	0.0329629	0.370384	0.614054	0.593347	0.0207069	FALSE	2.10542	3 vs 4	0.115956	1 vs 5	-0.214689	-0.330645	Ro60:chr1:143750790-143751162:-1, Ro60:chr1:143752616-143752972:-1, Ro60:chr1:143753382-143753696:-1, Ro60:chr1:143755381-143755529:-1, Ro60:chr1:143755510-143756156:-1, Ro60:chr1:143756675-143756964:-1, Ro60:chr1:143756456-143757304:-1, Ro60:chr1:143756923-143757240:-1, Ro60:chr1:143757074-143757792:-1	Ro60	0.0953598	0.56102	FALSE	FALSE	0.370384	0.62895	FALSE
1445	0.437129	NA	0.345238	0.328261	0.0169772	TRUE	1.46634	5 vs 3	0.115666	5 vs 3	0.0634921	-0.0521739	Ncbp3:chr11:73079463-73080270:1, Ncbp3:chr11:73079698-73080084:1, Ncbp3:chr11:73079917-73080208:1, Ncbp3:chr11:73082688-73083177:1, Ncbp3:chr11:73088865-73089317:1	Ncbp3	NA	NA	FALSE	FALSE	0.437129	NA	FALSE
1446	0.421769	0.584346	0.544355	0.5003	0.0440544	FALSE	0.623554	3 vs 2	0.115656	5 vs 2	-0.145161	-0.260817	Klhl24:chr16:20122807-20123264:1, Klhl24:chr16:20123707-20124080:1, Klhl24:chr16:20124861-20125086:1, Klhl24:chr16:20125001-20125616:1, Klhl24:chr16:20128838-20129240:1	Klhl24	0.61112	0.742924	FALSE	FALSE	0.584346	0.817282	FALSE
1447	4.56905e-08	2.17531e-06	0.634606	0.576809	0.0577974	FALSE	0.242342	1 vs 2	0.115595	1 vs 2	0.269213	0.153618	Macroh2a1:chr13:56073567-56074002:-1, Macroh2a1:chr13:56074201-56074448:-1	Macroh2a1	5.18098e-07	2.10744e-05	FALSE	FALSE	2.17531e-06	2.24605e-05	FALSE
1448	0.340377	0.614632	0.164179	0.106383	0.0577961	TRUE	0.500775	2 vs 1	0.115592	2 vs 1	-0.671642	-0.787234	Tbc1d9b:chr11:50171632-50172058:1, Tbc1d9b:chr11:50172442-50172786:1	Tbc1d9b	NA	NA	FALSE	FALSE	0.614632	NA	FALSE
1449	0.951395	NA	0.642857	0.585106	0.0577508	TRUE	0.287682	1 vs 3	0.115502	1 vs 3	0.285714	0.170213	Shc2:chr10:79617938-79618235:-1, Shc2:chr10:79617951-79618395:-1, Shc2:chr10:79618723-79619130:-1	Shc2	NA	NA	FALSE	FALSE	0.951395	NA	FALSE
1450	0.06517	0.0642029	0.678423	0.637755	0.0406681	FALSE	0.590196	2 vs 1	0.115243	2 vs 1	-0.06639	-0.181633	Phospho2:chr2:69795779-69796324:1, Phospho2:chr2:69796594-69796824:1, Phospho2:chr2:69796835-69797266:1	Phospho2	0.162925	0.165601	FALSE	FALSE	0.06517	0.189039	FALSE
1451	0.287145	NA	0.966667	0.909091	0.0575758	TRUE	1.06471	2 vs 1	0.115152	2 vs 1	0.933333	0.818182	Purg:chr8:33391364-33391631:1, Purg:chr8:33417078-33417474:1	Purg	NA	NA	FALSE	FALSE	0.287145	NA	FALSE
1452	0.027266	0.0510065	0.933649	0.876093	0.057556	FALSE	0.688203	2 vs 1	0.115112	2 vs 1	0.867299	0.752187	Fam107b:chr2:3779688-3780198:1, Fam107b:chr2:3781750-3782142:1	Fam107b	0.0825454	0.139591	FALSE	FALSE	0.0510065	0.157327	FALSE
1453	0.000107644	0.000247786	0.365825	0.320826	0.0449994	FALSE	-0.892527	3 vs 2	0.115018	4 vs 1	-0.343689	-0.458707	Celf1:chr2:91014814-91015207:1, Celf1:chr2:91016720-91017040:1, Celf1:chr2:91018444-91018925:1, Celf1:chr2:91018816-91019303:1, Celf1:chr2:91019078-91019309:1, Celf1:chr2:91019156-91019497:1	Celf1	0.000689207	0.00157104	FALSE	FALSE	0.000247786	0.00169187	FALSE
1454	0.00490354	0.00524125	0.636849	0.579379	0.0574705	FALSE	0.241491	2 vs 1	0.114941	2 vs 1	0.273698	0.158757	Dda1:chr8:71474710-71475140:1, Dda1:chr8:71475711-71476098:1	Dda1	0.020044	0.0225076	FALSE	FALSE	0.00524125	0.0249303	FALSE
1455	0.366853	0.291364	0.821782	0.764323	0.0574593	FALSE	0.476288	3 vs 1	0.114919	3 vs 1	0.643564	0.528646	Chfr:chr5:110136178-110136674:1, Chfr:chr5:110136401-110136619:1, Chfr:chr5:110171570-110172009:1	Chfr	0.55652	0.479079	FALSE	FALSE	0.366853	0.62518	FALSE
1456	0.348831	0.151757	0.808194	0.785714	0.0224794	TRUE	Inf	2 vs 1	0.114707	4 vs 3	0.413408	0.298701	Sncaip:chr18:52915275-52915682:1, Sncaip:chr18:52915412-52915811:1, Sncaip:chr18:52915532-52915773:1, Sncaip:chr18:52915584-52915934:1	Sncaip	NA	NA	FALSE	FALSE	0.348831	NA	FALSE
1457	0.00423848	0.0205315	0.132576	0.128521	0.00405463	FALSE	1.92344	2 vs 3	0.114597	2 vs 3	-0.0227273	-0.137324	Tmem44:chr16:30511755-30512308:-1, Tmem44:chr16:30513051-30513762:-1, Tmem44:chr16:30513660-30514018:-1, Tmem44:chr16:30513975-30514281:-1	Tmem44	0.017736	0.0714474	FALSE	FALSE	0.0205315	0.0792555	FALSE
1458	0.494413	0.649867	0.406728	0.369048	0.0376802	TRUE	0.710847	1 vs 4	0.114515	3 vs 4	0.275229	0.160714	Ankrd17:chr5:90227121-90227562:-1, Ankrd17:chr5:90227956-90228357:-1, Ankrd17:chr5:90228760-90229002:-1, Ankrd17:chr5:90228637-90229252:-1	Ankrd17	NA	NA	FALSE	FALSE	0.649867	NA	FALSE
1459	0.0477043	0.0748218	0.278867	0.227899	0.0509677	FALSE	0.679938	1 vs 2	0.114403	1 vs 4	-0.437908	-0.552311	Igf2bp1:chr11:95957163-95957509:-1, Igf2bp1:chr11:95957980-95958405:-1, Igf2bp1:chr11:95961557-95962092:-1, Igf2bp1:chr11:95962787-95963739:-1	Igf2bp1	0.12795	0.185865	FALSE	FALSE	0.0748218	0.208157	FALSE
1460	0.814917	NA	0.857143	0.8	0.0571429	TRUE	0.405465	1 vs 2	0.114286	1 vs 2	0.714286	0.6	Zfp36l2:chr17:84183928-84184288:-1, Zfp36l2:chr17:84185362-84185825:-1	Zfp36l2	NA	NA	FALSE	FALSE	0.814917	NA	FALSE
1461	0.723119	NA	0.903226	0.846154	0.057072	TRUE	0.955511	3 vs 1	0.114144	3 vs 1	0.806452	0.692308	Dna2:chr10:62973535-62974001:1, Dna2:chr10:62973804-62973975:1, Dna2:chr10:62973841-62974188:1	Dna2	NA	NA	FALSE	FALSE	0.723119	NA	FALSE
1462	0.780516	0.86815	0.723684	0.666667	0.0570175	TRUE	0.269664	2 vs 1	0.114035	2 vs 1	0.447368	0.333333	Gbe1:chr16:70569095-70569740:1, Gbe1:chr16:70569385-70569712:1	Gbe1	NA	NA	FALSE	FALSE	0.86815	NA	FALSE
1463	0.159683	0.224456	0.549639	0.492701	0.0569383	FALSE	0.34607	2 vs 1	0.113877	3 vs 1	0.099278	-0.0145985	Rcc2:chr4:140721047-140721497:1, Rcc2:chr4:140722577-140723106:1, Rcc2:chr4:140722918-140723209:1	Rcc2	0.313552	0.405999	FALSE	FALSE	0.224456	0.461369	FALSE
1464	0.0291279	0.0487545	0.81295	0.808167	0.0047825	FALSE	1.77452	3 vs 4	0.113755	3 vs 4	0.122302	0.00854701	Tcf20:chr15:82808434-82808789:-1, Tcf20:chr15:82808447-82809034:-1, Tcf20:chr15:82809076-82809468:-1, Tcf20:chr15:82809336-82810015:-1	Tcf20	0.0871082	0.136243	FALSE	FALSE	0.0487545	0.152746	FALSE
1465	0.313018	0.47718	0.838384	0.781553	0.0568304	FALSE	0.37151	2 vs 1	0.113661	2 vs 1	0.676768	0.563107	Klhl12:chr1:134490254-134491014:1, Klhl12:chr1:134490536-134490846:1	Klhl12	0.501302	0.652586	FALSE	FALSE	0.47718	0.723172	FALSE
1466	0.00597144	0.0234946	0.892308	0.835546	0.0567612	FALSE	0.489075	1 vs 2	0.113522	1 vs 2	0.784615	0.671093	Akirin1:chr4:123735316-123735743:-1, Akirin1:chr4:123736479-123736796:-1	Akirin1	0.0236622	0.0794746	FALSE	FALSE	0.0234946	0.0876302	FALSE
1467	0.119332	NA	0.0978261	0.0411765	0.0566496	FALSE	0.926224	2 vs 1	0.113299	2 vs 1	-0.804348	-0.917647	Ciao3:chr17:25782354-25782864:1, Ciao3:chr17:25782884-25783332:1	Ciao3	0.252418	NA	FALSE	FALSE	0.119332	0.295185	FALSE
1468	0.337847	NA	0.84322	0.786667	0.0565537	TRUE	0.377438	1 vs 2	0.113107	1 vs 2	0.686441	0.573333	Pola2:chr19:5940541-5940899:-1, Pola2:chr19:5941052-5941421:-1	Pola2	NA	NA	FALSE	FALSE	0.337847	NA	FALSE
1469	0.183034	0.350769	0.245283	0.238095	0.00718778	TRUE	-1.42712	1 vs 3	0.113015	3 vs 4	-0.509434	-0.622449	Inpp1:chr1:52785356-52785810:-1, Inpp1:chr1:52788842-52789178:-1, Inpp1:chr1:52788909-52789388:-1, Inpp1:chr1:52789391-52789791:-1	Inpp1	NA	NA	FALSE	FALSE	0.350769	NA	FALSE
1470	0.0317241	0.0349113	0.176339	0.11986	0.0564789	FALSE	0.527889	3 vs 1	0.112958	3 vs 1	-0.647321	-0.760279	Map2k6:chr11:110513259-110513674:1, Map2k6:chr11:110515801-110516191:1, Map2k6:chr11:110522655-110523044:1	Map2k6	0.0924152	0.106865	FALSE	FALSE	0.0349113	0.118266	FALSE
1471	0.626265	0.474556	0.265306	0.208955	0.0563509	TRUE	0.312665	1 vs 2	0.112702	1 vs 2	-0.469388	-0.58209	Ier5l:chr2:30471769-30471980:-1, Ier5l:chr2:30472615-30472989:-1	Ier5l	NA	NA	FALSE	FALSE	0.626265	NA	FALSE
1472	0.557634	0.696929	0.587368	0.551351	0.0360171	TRUE	-1.26851	4 vs 5	0.11266	1 vs 4	0.0315789	-0.0810811	Recql:chr6:142356876-142357336:-1, Recql:chr6:142361368-142361717:-1, Recql:chr6:142362129-142362495:-1, Recql:chr6:142361912-142362776:-1, Recql:chr6:142362467-142362674:-1, Recql:chr6:142362554-142362906:-1	Recql	NA	NA	FALSE	FALSE	0.696929	NA	FALSE
1473	4.70587e-26	3.53789e-18	0.914849	0.860372	0.0544777	FALSE	1.39176	1 vs 4	0.112614	1 vs 4	0.773577	0.660963	Ptn:chr6:36714893-36715316:-1, Ptn:chr6:36715096-36715567:-1, Ptn:chr6:36714949-36715902:-1, Ptn:chr6:36715624-36715806:-1	Ptn	1.89729e-24	1.05787e-16	FALSE	FALSE	3.53789e-18	1.12328e-16	FALSE
1474	0.260895	0.0471739	0.87395	0.817647	0.0563025	FALSE	0.435854	1 vs 2	0.112605	1 vs 2	0.747899	0.635294	Pcyox1l:chr18:61696837-61697156:-1, Pcyox1l:chr18:61697005-61697449:-1	Pcyox1l	0.442372	0.133165	FALSE	FALSE	0.260895	0.506631	FALSE
1475	0.216525	0.324068	0.916667	0.86037	0.0562971	FALSE	0.579532	1 vs 2	0.112594	1 vs 2	0.833333	0.720739	Pdzd4:chrX:73793350-73793684:-1, Pdzd4:chrX:73793683-73794250:-1	Pdzd4	0.388198	0.512993	FALSE	FALSE	0.324068	0.577195	FALSE
1476	0.0657257	0.0526462	0.716073	0.679784	0.0362886	TRUE	#NAME?	1 vs 5	0.112397	1 vs 6	0.242026	0.12963	Jpt2:chr17:24942130-24942414:-1, Jpt2:chr17:24942332-24942557:-1, Jpt2:chr17:24942411-24942847:-1, Jpt2:chr17:24942641-24943307:-1, Jpt2:chr17:24944032-24944375:-1, Jpt2:chr17:24944148-24944636:-1, Jpt2:chr17:24944463-24944721:-1	Jpt2	NA	NA	FALSE	FALSE	0.0657257	NA	FALSE
1477	0.252652	NA	0.967742	0.911565	0.0561773	TRUE	1.06831	1 vs 2	0.112355	1 vs 2	0.935484	0.823129	Glrb:chr3:80843574-80843977:-1, Glrb:chr3:80855602-80855977:-1	Glrb	NA	NA	FALSE	FALSE	0.252652	NA	FALSE
1478	0.206041	0.262351	0.326823	0.270538	0.0562847	FALSE	Inf	1 vs 2	0.112341	1 vs 7	-0.34375	-0.456091	Cwc25:chr11:97745470-97745982:-1, Cwc25:chr11:97745996-97746216:-1, Cwc25:chr11:97746683-97746819:-1, Cwc25:chr11:97746746-97747118:-1, Cwc25:chr11:97746985-97747211:-1, Cwc25:chr11:97747118-97747213:-1, Cwc25:chr11:97756211-97756588:-1	Cwc25	0.376236	0.446532	FALSE	FALSE	0.262351	0.508293	FALSE
1479	0.0651767	0.100986	0.509494	0.446358	0.0631361	TRUE	#NAME?	1 vs 2	0.11208	3 vs 9	0.0822785	-0.0298013	Zfp329:chr7:12798872-12799249:-1, Zfp329:chr7:12798889-12799432:-1, Zfp329:chr7:12804323-12804840:-1, Zfp329:chr7:12804778-12805124:-1, Zfp329:chr7:12804939-12805329:-1, Zfp329:chr7:12805160-12805497:-1, Zfp329:chr7:12805413-12805794:-1, Zfp329:chr7:12806124-12806397:-1, Zfp329:chr7:12806038-12806611:-1, Zfp329:chr7:12807986-12808357:-1, Zfp329:chr7:12809940-12810281:-1	Zfp329	NA	NA	FALSE	FALSE	0.100986	NA	FALSE
1480	0.274849	0.401354	0.341346	0.337891	0.00345553	TRUE	-0.496569	3 vs 2	0.112079	2 vs 1	-0.298077	-0.410156	Lrrc8d:chr5:105814412-105814748:1, Lrrc8d:chr5:105814675-105815196:1, Lrrc8d:chr5:105814889-105815221:1	Lrrc8d	NA	NA	FALSE	FALSE	0.401354	NA	FALSE
1481	0.610981	NA	0.613636	0.557692	0.0559441	TRUE	1.09861	1 vs 3	0.111888	1 vs 3	0.227273	0.115385	Zfp85:chr13:67747098-67747774:-1, Zfp85:chr13:67747781-67748139:-1, Zfp85:chr13:67747951-67748333:-1	Zfp85	NA	NA	FALSE	FALSE	0.610981	NA	FALSE
1482	0.00468703	0.0216791	0.244088	0.21167	0.0324174	FALSE	0.874872	2 vs 1	0.111626	2 vs 1	-0.611486	-0.723112	Isoc1:chr18:58677870-58678241:1, Isoc1:chr18:58678533-58678995:1, Isoc1:chr18:58679977-58680389:1	Isoc1	0.0192639	0.0739532	FALSE	FALSE	0.0216791	0.0820639	FALSE
1483	0.0105186	0.00367729	0.386841	0.339321	0.0475199	FALSE	0.991879	8 vs 5	0.111542	8 vs 1	-0.159915	-0.271457	Ppp4r3b:chr11:29209241-29209629:1, Ppp4r3b:chr11:29218372-29218848:1, Ppp4r3b:chr11:29218687-29219091:1, Ppp4r3b:chr11:29218855-29219102:1, Ppp4r3b:chr11:29219301-29219692:1, Ppp4r3b:chr11:29219589-29220032:1, Ppp4r3b:chr11:29219746-29219996:1, Ppp4r3b:chr11:29220390-29220831:1	Ppp4r3b	0.038277	0.0168682	FALSE	FALSE	0.0105186	0.0453605	FALSE
1484	0.0529397	0.695873	0.512642	0.448193	0.064449	FALSE	0.702424	10 vs 1	0.111347	11 vs 1	-0.0794165	-0.190763	Nucks1:chr1:131930813-131931007:1, Nucks1:chr1:131930964-131931284:1, Nucks1:chr1:131931402-131931602:1, Nucks1:chr1:131931465-131932265:1, Nucks1:chr1:131931488-131931837:1, Nucks1:chr1:131931902-131932257:1, Nucks1:chr1:131932070-131932317:1, Nucks1:chr1:131931777-131932529:1, Nucks1:chr1:131932559-131933003:1, Nucks1:chr1:131935668-131936373:1, Nucks1:chr1:131935979-131936330:1	Nucks1	0.139341	0.818952	FALSE	FALSE	0.695873	0.887307	FALSE
1485	0.106939	0.0360649	0.455537	0.424812	0.0307249	TRUE	0.949081	1 vs 2	0.111243	1 vs 3	0.231544	0.120301	Mlec:chr5:115142981-115143349:-1, Mlec:chr5:115145097-115145406:-1, Mlec:chr5:115146366-115146743:-1, Mlec:chr5:115147122-115147543:-1, Mlec:chr5:115147765-115148260:-1	Mlec	NA	NA	FALSE	FALSE	0.106939	NA	FALSE
1486	1	NA	1	0.944444	0.0555556	TRUE	Inf	2 vs 1	0.111111	2 vs 1	1	0.888889	Reep6:chr10:80336010-80336175:1, Reep6:chr10:80336082-80336478:1	Reep6	NA	NA	FALSE	FALSE	1	NA	FALSE
1487	0.389252	0.518402	0.56383	0.508274	0.0555556	TRUE	0.22362	2 vs 1	0.111111	2 vs 1	0.12766	0.0165485	Usp11:chrX:20719857-20720408:1, Usp11:chrX:20720189-20720539:1	Usp11	NA	NA	FALSE	FALSE	0.518402	NA	FALSE
1488	0.102578	0.221354	0.368421	0.349915	0.0185058	TRUE	0.76705	1 vs 3	0.110816	1 vs 2	0.0977444	-0.0130719	Bcl11b:chr12:107910396-107910741:-1, Bcl11b:chr12:107912603-107912972:-1, Bcl11b:chr12:107913615-107914040:-1, Bcl11b:chr12:107915201-107915557:-1	Bcl11b	NA	NA	FALSE	FALSE	0.221354	NA	FALSE
1489	0.0152323	0.0270216	0.865079	0.809677	0.0554019	FALSE	0.783604	3 vs 1	0.110804	3 vs 1	0.730159	0.619355	Crk:chr11:75700438-75700792:1, Crk:chr11:75704979-75705413:1, Crk:chr11:75705692-75706093:1	Crk	0.0517248	0.0879655	FALSE	FALSE	0.0270216	0.0973545	FALSE
1490	0.173044	0.231504	0.713615	0.698954	0.0146614	FALSE	-0.499113	2 vs 3	0.110794	1 vs 2	0.450704	0.33991	Akt3:chr1:177020020-177020421:-1, Akt3:chr1:177022079-177022469:-1, Akt3:chr1:177022438-177022751:-1, Akt3:chr1:177025012-177025479:-1	Akt3	0.33323	0.414208	FALSE	FALSE	0.231504	0.471926	FALSE
1491	0.780157	0.702427	0.365625	0.348534	0.0170908	TRUE	0.606136	5 vs 1	0.110627	2 vs 1	0.3875	0.276873	Bace1:chr9:45861806-45862177:1, Bace1:chr9:45861926-45862185:1, Bace1:chr9:45861934-45862564:1, Bace1:chr9:45863964-45864465:1, Bace1:chr9:45864503-45864879:1	Bace1	NA	NA	FALSE	FALSE	0.780157	NA	FALSE
1492	0.0336693	0.024989	0.227707	0.204745	0.0229625	FALSE	-0.299955	1 vs 2	0.110582	2 vs 3	-0.232484	-0.343066	Ghitm:chr14:37120364-37120863:-1, Ghitm:chr14:37120757-37121216:-1, Ghitm:chr14:37121933-37122293:-1	Ghitm	0.0971819	0.0832509	FALSE	FALSE	0.0336693	0.115412	FALSE
1493	0.0525365	0.00700032	0.729101	0.694972	0.0341285	TRUE	1.72277	2 vs 6	0.110549	2 vs 6	0.021164	-0.0893855	Purb:chr11:6467599-6467916:-1, Purb:chr11:6467773-6468072:-1, Purb:chr11:6469579-6469953:-1, Purb:chr11:6471556-6471946:-1, Purb:chr11:6473377-6473781:-1, Purb:chr11:6474778-6475098:-1	Purb	NA	NA	FALSE	FALSE	0.0525365	NA	FALSE
1494	7.41262e-07	2.11247e-06	0.951456	0.89621	0.0552461	FALSE	0.819723	2 vs 1	0.110492	2 vs 1	0.902913	0.79242	Ubqln2:chrX:153500026-153500399:1, Ubqln2:chrX:153501132-153501570:1	Ubqln2	6.87156e-06	2.07142e-05	FALSE	FALSE	2.11247e-06	2.19905e-05	FALSE
1495	0.227577	0.239411	0.162313	0.12	0.0423134	TRUE	0.743359	2 vs 1	0.110239	2 vs 1	-0.697761	-0.808	Rragd:chr4:33018559-33018880:1, Rragd:chr4:33021341-33021779:1, Rragd:chr4:33021814-33022194:1	Rragd	NA	NA	FALSE	FALSE	0.239411	NA	FALSE
1496	0.782903	0.934566	0.646341	0.635135	0.0112063	TRUE	-0.693147	2 vs 1	0.110086	3 vs 2	-0.268293	-0.378378	Plp1:chrX:136836990-136837566:1, Plp1:chrX:136837286-136837885:1, Plp1:chrX:136837989-136838390:1	Plp1	NA	NA	FALSE	FALSE	0.934566	NA	FALSE
1497	0.471184	0.298356	0.387097	0.332061	0.0550357	TRUE	0.674455	3 vs 1	0.110071	3 vs 1	-0.225806	-0.335878	Eya3:chr4:132721775-132722147:1, Eya3:chr4:132724447-132724763:1, Eya3:chr4:132724241-132724830:1	Eya3	NA	NA	FALSE	FALSE	0.471184	NA	FALSE
1498	0.253227	0.356681	0.453307	0.398329	0.0549787	FALSE	0.322472	1 vs 2	0.109957	1 vs 3	-0.0933852	-0.203343	Cbl:chr9:44142975-44143336:-1, Cbl:chr9:44144067-44144332:-1, Cbl:chr9:44149212-44149665:-1	Cbl	0.434207	0.548496	FALSE	FALSE	0.356681	0.615887	FALSE
1499	0.43537	0.154882	0.897059	0.842105	0.0549536	TRUE	0.490987	2 vs 1	0.109907	2 vs 1	0.794118	0.684211	Rbbp5:chr1:132504516-132504890:1, Rbbp5:chr1:132505286-132505689:1	Rbbp5	NA	NA	FALSE	FALSE	0.43537	NA	FALSE
1500	1.49476e-07	3.01674e-07	0.84831	0.793461	0.0548487	FALSE	0.375489	1 vs 2	0.109697	1 vs 2	0.696619	0.586922	Spcs2:chr7:99838858-99839320:-1, Spcs2:chr7:99839717-99839953:-1	Spcs2	1.57539e-06	3.41427e-06	FALSE	FALSE	3.01674e-07	3.64882e-06	FALSE
1501	0.633678	0.410293	0.837838	0.783019	0.054819	TRUE	0.358881	2 vs 1	0.109638	2 vs 1	0.675676	0.566038	Aldh4a1:chr4:139649007-139649744:1, Aldh4a1:chr4:139649386-139649680:1	Aldh4a1	NA	NA	FALSE	FALSE	0.633678	NA	FALSE
1502	0.504585	NA	0.24	0.177778	0.0622222	TRUE	1.09861	2 vs 3	0.10963	1 vs 4	-0.52	-0.62963	Ufl1:chr4:25248569-25248916:-1, Ufl1:chr4:25249103-25249918:-1, Ufl1:chr4:25249435-25249736:-1, Ufl1:chr4:25250080-25250581:-1	Ufl1	NA	NA	FALSE	FALSE	0.504585	NA	FALSE
1503	0.011827	0.047795	0.475714	0.473348	0.00236674	FALSE	0.802686	3 vs 2	0.109382	3 vs 2	-0.728571	-0.837953	Wdr82:chr9:106189358-106189764:1, Wdr82:chr9:106190730-106191138:1, Wdr82:chr9:106192600-106192981:1	Wdr82	0.0421327	0.134292	FALSE	FALSE	0.047795	0.15062	FALSE
1504	0.0991443	0.16369	0.877323	0.822642	0.0546819	FALSE	0.432977	2 vs 1	0.109364	2 vs 1	0.754647	0.645283	Zcchc10:chr11:53332293-53333326:1, Zcchc10:chr11:53332856-53333291:1	Zcchc10	0.22034	0.327658	FALSE	FALSE	0.16369	0.36989	FALSE
1505	0.861762	NA	0.631579	0.576923	0.0546559	TRUE	0.228842	1 vs 2	0.109312	1 vs 2	0.263158	0.153846	Ago4:chr4:126489528-126489884:-1, Ago4:chr4:126492145-126492552:-1	Ago4	NA	NA	FALSE	FALSE	0.861762	NA	FALSE
1506	0.0281346	0.054282	0.913043	0.858427	0.0546165	FALSE	0.549089	1 vs 2	0.109233	1 vs 2	0.826087	0.716854	Aplp2:chr9:31149501-31149921:-1, Aplp2:chr9:31150642-31150941:-1	Aplp2	0.0844703	0.145594	FALSE	FALSE	0.054282	0.16453	FALSE
1507	0.49004	0.512966	0.814815	0.781095	0.0337203	TRUE	1.21502	2 vs 3	0.109038	2 vs 3	0.138889	0.0298507	Usp37:chr1:74435509-74435861:-1, Usp37:chr1:74437549-74437998:-1, Usp37:chr1:74437591-74438309:-1, Usp37:chr1:74438843-74439177:-1	Usp37	NA	NA	FALSE	FALSE	0.512966	NA	FALSE
1508	0.323035	0.629618	0.421053	0.390865	0.0301872	FALSE	0.593345	3 vs 6	0.108932	3 vs 6	0.226721	0.117788	mt-Nd6:chrM:11814-12099:-1, mt-Nd6:chrM:11874-12659:-1, mt-Nd6:chrM:11972-12881:-1, mt-Nd6:chrM:12950-13295:-1, mt-Nd6:chrM:13102-13495:-1, mt-Nd6:chrM:13064-14070:-1	mt-Nd6	0.509633	0.772901	FALSE	FALSE	0.629618	0.842142	FALSE
1509	0.452058	0.378221	0.568182	0.520231	0.0479506	TRUE	1.11412	4 vs 3	0.108316	4 vs 3	0.420455	0.312139	Endov:chr11:119507368-119507820:1, Endov:chr11:119509224-119509511:1, Endov:chr11:119510928-119511348:1, Endov:chr11:119511069-119511469:1	Endov	NA	NA	FALSE	FALSE	0.452058	NA	FALSE
1510	0.56203	0.593212	0.633333	0.579208	0.0541254	TRUE	0.640879	2 vs 3	0.108251	1 vs 3	0.266667	0.158416	Hipk1:chr3:103739815-103740133:-1, Hipk1:chr3:103739972-103740212:-1, Hipk1:chr3:103740094-103740517:-1	Hipk1	NA	NA	FALSE	FALSE	0.593212	NA	FALSE
1511	0.354593	0.227311	0.568552	0.545655	0.0228969	TRUE	-1.56862	6 vs 2	0.10804	8 vs 5	-0.134228	-0.242268	Tubgcp4:chr2:121196558-121196735:1, Tubgcp4:chr2:121196248-121197301:1, Tubgcp4:chr2:121196693-121197058:1, Tubgcp4:chr2:121197260-121197686:1, Tubgcp4:chr2:121197719-121198182:1, Tubgcp4:chr2:121198092-121198346:1, Tubgcp4:chr2:121198248-121198770:1, Tubgcp4:chr2:121198456-121198770:1	Tubgcp4	NA	NA	FALSE	FALSE	0.354593	NA	FALSE
1512	0.546802	NA	0.837963	0.781609	0.0563538	TRUE	#NAME?	2 vs 1	0.107759	4 vs 1	0.625	0.517241	Stk4:chr2:164151845-164152277:1, Stk4:chr2:164151641-164152439:1, Stk4:chr2:164154755-164155459:1, Stk4:chr2:164155155-164155534:1	Stk4	NA	NA	FALSE	FALSE	0.546802	NA	FALSE
1513	0.486285	0.928566	0.82	0.766129	0.053871	TRUE	0.329766	2 vs 1	0.107742	2 vs 1	0.64	0.532258	Sfxn3:chr19:45055839-45056121:1, Sfxn3:chr19:45056010-45056400:1	Sfxn3	NA	NA	FALSE	FALSE	0.928566	NA	FALSE
1514	0.000984564	0.0111665	0.520769	0.466946	0.0538236	FALSE	0.215535	2 vs 1	0.107647	2 vs 1	0.0415385	-0.0661088	Tpm3-rs7:chr14:113316135-113316380:1, Tpm3-rs7:chr14:113316352-113316681:1	Tpm3-rs7	0.00490351	0.0425909	FALSE	FALSE	0.0111665	0.0477489	FALSE
1515	0.197692	0.333335	0.297931	0.326	-0.028069	TRUE	-1.63576	6 vs 5	0.107586	5 vs 4	-0.172414	-0.28	Gm2007:chr2:175748759-175749076:1, Gm2007:chr2:175752064-175752276:1, Gm2007:chr2:175753333-175753775:1, Gm2007:chr2:175753978-175754290:1, Gm2007:chr2:175759969-175760136:1, Gm2007:chr2:175761777-175762140:1	Gm2007	NA	NA	FALSE	FALSE	0.333335	NA	FALSE
[truncated: 4,829 more rows]

## Sheet: utr.rgc.vs.neu
	pval.chisq	pval.DM	warm.base	warm.alt	delta.warm	low.pct.flag	max.log.or	max.abs.log.or.id	max.prpchg	max.abs.prpchg.id	prp.dif.base	prp.dif.alt	pks	Transcript.ID	gene	pval.chisq.adj	pval.DM.adj	sig.chisq	sig.DM	pval.inter	pval.adj	sig
[truncated: 6,247 more rows]

[truncated: 1 more sheets: btw.rgc.vs.neu]
