# Supplementary material for: Infernape uncovers cell type–specific and spatially resolved alternative polyadenylation in the brain
Source: HighWire-hosted journal article supplement (doi:10.1101/gr.277864.123), 2023-10-01
Supplement: Supplemental_Tables.zip [file Supplemental_Table_S8.xlsx]

## Sheet: README
	Table legend
	This table shows differential PA events between cell-type pairs in the developping mouse brain dataset using the across-UTR-level test.
	The sheet name is of format 'A.vs.B'
	'A' and 'B' represent the baseline and alternative cell-type in comparison, respectively.
	For example, sheet 'cor_glu.vs.dorsal_nb' shows the differential PA events for comparing cortical Glutamertagic neuron with dorsal neuroblast by using the across-UTR-level test.

## Sheet: cor_glu.vs.dorsal_nb
	pval.chisq	pval.DM	warm.base	warm.alt	delta.warm	low.pct.flag	max.log.or	max.abs.log.or.id	max.prpchg	max.abs.prpchg.id	prp.dif.base	prp.dif.alt	trans	gene	pval.chisq.adj	pval.DM.adj	sig.chisq	sig.DM	pval.inter	pval.adj	sig
1	0.327187	NA	1	0	1	TRUE	Inf	1 vs 2	2	1 vs 2	1	-1	Nkx2-2:ENSMUST00000109970.4, Nkx2-2:ENSMUST00000067075.6	Nkx2-2	NA	NA	FALSE	FALSE	0.327187	NA	FALSE
2	0.461502	NA	0.821429	0	0.821429	TRUE	Inf	2 vs 1	1.64286	2 vs 1	0.642857	-1	Synj2:ENSMUST00000115786.7, Synj2:ENSMUST00000115791.9	Synj2	NA	NA	FALSE	FALSE	0.461502	NA	FALSE
3	0.512913	NA	0.776786	0	0.776786	TRUE	Inf	2 vs 1	1.55357	2 vs 1	0.553571	-1	Ttc7:ENSMUST00000125875.7, Ttc7:ENSMUST00000041110.11	Ttc7	NA	NA	FALSE	FALSE	0.512913	NA	FALSE
4	0.819477	NA	0.75	0	0.75	TRUE	Inf	2 vs 1	1.5	2 vs 1	0.5	-1	Cd84:ENSMUST00000135386.1, Cd84:ENSMUST00000155802.7	Cd84	NA	NA	FALSE	FALSE	0.819477	NA	FALSE
5	0.70766	NA	0.75	0	0.75	TRUE	Inf	1 vs 2	1.5	1 vs 2	0.5	-1	Obscn:ENSMUST00000238536.1, Obscn:ENSMUST00000020732.12	Obscn	NA	NA	FALSE	FALSE	0.70766	NA	FALSE
6	2.90211e-07	NA	0.835616	0.111111	0.724505	TRUE	3.70541	1 vs 2	1.44901	1 vs 2	0.671233	-0.777778	Pcdh1:ENSMUST00000160721.7, Pcdh1:ENSMUST00000057185.12	Pcdh1	NA	NA	FALSE	FALSE	2.90211e-07	NA	FALSE
7	0.71714	NA	0.7	0	0.7	TRUE	Inf	1 vs 2	1.4	1 vs 2	0.4	-1	Cfap206:ENSMUST00000029971.11, Cfap206:ENSMUST00000108136.7	Cfap206	NA	NA	FALSE	FALSE	0.71714	NA	FALSE
8	3.42185e-289	1.08342e-196	0.793156	0.522173	0.270983	TRUE	3.77866	3 vs 2	1.32677	3 vs 2	0.588415	-0.738359	Ntrk2:ENSMUST00000225583.1, Ntrk2:ENSMUST00000109838.9, Ntrk2:ENSMUST00000079828.6	Ntrk2	NA	NA	FALSE	FALSE	1.08342e-196	NA	FALSE
9	3.14836e-25	NA	0.868984	0.344828	0.524156	TRUE	4.51375	3 vs 2	1.25106	3 vs 2	0.716578	-0.534483	Il1rap:ENSMUST00000174202.7, Il1rap:ENSMUST00000023156.12, Il1rap:ENSMUST00000096129.8	Il1rap	NA	NA	FALSE	FALSE	3.14836e-25	NA	FALSE
10	4.64988e-05	NA	0.788538	0.25	0.538538	TRUE	2.41474	1 vs 2	1.07708	1 vs 2	0.577075	-0.5	Dpf3:ENSMUST00000178756.7, Dpf3:ENSMUST00000177959.7	Dpf3	NA	NA	FALSE	FALSE	4.64988e-05	NA	FALSE
11	1.56533e-124	2.76883e-121	0.664007	0.136042	0.527964	FALSE	2.52976	2 vs 1	1.05593	2 vs 1	0.328013	-0.727915	Syngr1:ENSMUST00000009728.12, Syngr1:ENSMUST00000009727.11	Syngr1	3.5807e-123	8.37573e-120	TRUE	TRUE	2.76883e-121	9.21267e-120	TRUE
12	3.83827e-111	5.30087e-116	0.666952	0.147135	0.519817	TRUE	2.45168	2 vs 1	1.03963	2 vs 1	0.333904	-0.705729	Mta3:ENSMUST00000112349.8, Mta3:ENSMUST00000067826.14	Mta3	NA	NA	FALSE	FALSE	3.83827e-111	NA	FALSE
13	3.05493e-261	1.86326e-239	0.868056	0.350271	0.517785	FALSE	2.50172	2 vs 1	1.03557	2 vs 1	0.736111	-0.299458	Luc7l:ENSMUST00000025023.14, Luc7l:ENSMUST00000119928.7	Luc7l	1.24234e-259	9.66232e-238	TRUE	TRUE	1.86326e-239	9.74217e-238	TRUE
14	0.171321	NA	1	0.5	0.5	TRUE	Inf	1 vs 2	1	1 vs 2	1	0	Ccdc141:ENSMUST00000049544.13, Ccdc141:ENSMUST00000111833.2	Ccdc141	NA	NA	FALSE	FALSE	0.171321	NA	FALSE
15	0.698535	NA	1	0.5	0.5	TRUE	Inf	2 vs 1	1	2 vs 1	1	0	Vwa3b:ENSMUST00000117172.8, Vwa3b:ENSMUST00000238500.1	Vwa3b	NA	NA	FALSE	FALSE	0.698535	NA	FALSE
16	1.41891e-05	NA	0.564935	0.0833333	0.481602	TRUE	2.65911	1 vs 2	0.963203	1 vs 2	0.12987	-0.833333	Stx3:ENSMUST00000075304.13, Stx3:ENSMUST00000069285.5	Stx3	NA	NA	FALSE	FALSE	1.41891e-05	NA	FALSE
17	4.16553e-50	2.92017e-46	0.683453	0.215488	0.467965	TRUE	2.06184	2 vs 1	0.93593	2 vs 1	0.366906	-0.569024	Lemd1:ENSMUST00000189062.1, Lemd1:ENSMUST00000188169.6	Lemd1	NA	NA	FALSE	FALSE	2.92017e-46	NA	FALSE
18	0.00257666	NA	0.953875	0.5	0.453875	TRUE	3.02917	2 vs 1	0.907749	2 vs 1	0.907749	0	Trpm3:ENSMUST00000099566.4, Trpm3:ENSMUST00000237357.1	Trpm3	NA	NA	FALSE	FALSE	0.00257666	NA	FALSE
19	3.85405e-51	NA	0.471616	0.0283286	0.443287	TRUE	3.42149	2 vs 1	0.886574	2 vs 1	-0.0567686	-0.943343	Septin8:ENSMUST00000117061.7, Septin8:ENSMUST00000121334.7	Septin8	NA	NA	FALSE	FALSE	3.85405e-51	NA	FALSE
20	0.178379	NA	0.875	0.444444	0.430556	TRUE	2.16905	2 vs 1	0.861111	2 vs 1	0.75	-0.111111	Rreb1:ENSMUST00000110238.9, Rreb1:ENSMUST00000128570.8	Rreb1	NA	NA	FALSE	FALSE	0.178379	NA	FALSE
21	1.30069e-06	NA	0.851251	0.421053	0.430198	TRUE	2.0629	1 vs 2	0.860396	1 vs 2	0.702502	-0.157895	Dnm3:ENSMUST00000086074.11, Dnm3:ENSMUST00000160665.7	Dnm3	NA	NA	FALSE	FALSE	1.30069e-06	NA	FALSE
22	0.776814	NA	0.428571	0	0.428571	TRUE	Inf	1 vs 2	0.857143	1 vs 2	-0.142857	-1	Dpys:ENSMUST00000022915.10, Dpys:ENSMUST00000110306.8	Dpys	NA	NA	FALSE	FALSE	0.776814	NA	FALSE
23	7.48144e-103	1.15203e-48	0.958153	0.530864	0.427289	TRUE	3.00738	2 vs 1	0.854578	2 vs 1	0.916307	0.0617284	Lrrfip1:ENSMUST00000097649.9, Lrrfip1:ENSMUST00000068167.12	Lrrfip1	NA	NA	FALSE	FALSE	1.15203e-48	NA	FALSE
24	1.56009e-90	3.46988e-90	0.546576	0.12601	0.420566	FALSE	2.12356	2 vs 1	0.841132	2 vs 1	0.0931517	-0.747981	Dclk1:ENSMUST00000199585.4, Dclk1:ENSMUST00000070418.8	Dclk1	2.48258e-89	5.99793e-89	TRUE	TRUE	3.46988e-90	6.0475e-89	TRUE
25	3.8274e-109	NA	0.977635	0.560748	0.416887	TRUE	3.53343	1 vs 2	0.833774	1 vs 2	0.955269	0.121495	Spata6l:ENSMUST00000179171.1, Spata6l:ENSMUST00000025872.12	Spata6l	NA	NA	FALSE	FALSE	3.8274e-109	NA	FALSE
26	1.16852e-296	3.94266e-262	0.761305	0.344635	0.41667	FALSE	1.80255	2 vs 1	0.833339	2 vs 1	0.52261	-0.31073	Rnf130:ENSMUST00000054684.13, Rnf130:ENSMUST00000238748.1	Rnf130	5.346e-295	2.38531e-260	TRUE	TRUE	3.94266e-262	2.40502e-260	TRUE
27	4.18849e-12	NA	0.853333	0.437086	0.416247	TRUE	3.0037	1 vs 2	0.832494	1 vs 3	0.706667	-0.125828	Adgrv1:ENSMUST00000128120.1, Adgrv1:ENSMUST00000128585.8, Adgrv1:ENSMUST00000146749.1	Adgrv1	NA	NA	FALSE	FALSE	4.18849e-12	NA	FALSE
28	1.04048e-87	1.13452e-60	0.867556	0.461756	0.405799	TRUE	2.03279	1 vs 2	0.811598	1 vs 2	0.735111	-0.0764873	Septin6:ENSMUST00000060474.13, Septin6:ENSMUST00000053456.10	Septin6	NA	NA	FALSE	FALSE	1.13452e-60	NA	FALSE
29	0.177392	NA	0.571429	0.1875	0.383929	TRUE	1.75402	1 vs 2	0.767857	1 vs 2	0.142857	-0.625	Calca:ENSMUST00000032906.10, Calca:ENSMUST00000032907.8	Calca	NA	NA	FALSE	FALSE	0.177392	NA	FALSE
30	5.83823e-21	4.19538e-18	0.860526	0.479839	0.380688	TRUE	2.30692	1 vs 3	0.761375	1 vs 3	0.721053	-0.0403226	Sgsm1:ENSMUST00000048112.12, Sgsm1:ENSMUST00000112325.7, Sgsm1:ENSMUST00000112324.1	Sgsm1	NA	NA	FALSE	FALSE	4.19538e-18	NA	FALSE
31	0.000782346	NA	0.686275	0.366667	0.319608	TRUE	3.14169	2 vs 3	0.74902	2 vs 3	0.215686	-0.533333	Grik1:ENSMUST00000228188.1, Grik1:ENSMUST00000228034.1, Grik1:ENSMUST00000211444.1	Grik1	NA	NA	FALSE	FALSE	0.000782346	NA	FALSE
32	0.04661	0.0981147	0.874172	0.5	0.374172	TRUE	1.93836	1 vs 2	0.748344	1 vs 2	0.748344	0	D630023F18Rik:ENSMUST00000148020.7, D630023F18Rik:ENSMUST00000050047.3	D630023F18Rik	NA	NA	FALSE	FALSE	0.0981147	NA	FALSE
33	1.93459e-34	1.22312e-34	0.535978	0.164912	0.371065	TRUE	1.76628	2 vs 1	0.742131	2 vs 1	0.0719555	-0.670175	Dab1:ENSMUST00000106826.7, Dab1:ENSMUST00000106830.8	Dab1	NA	NA	FALSE	FALSE	1.93459e-34	NA	FALSE
34	0.257776	NA	0.469388	0.25	0.219388	TRUE	#NAME?	1 vs 2	0.709184	2 vs 3	-0.0408163	-0.75	Igsf1:ENSMUST00000114893.7, Igsf1:ENSMUST00000072037.12, Igsf1:ENSMUST00000114891.1	Igsf1	NA	NA	FALSE	FALSE	0.257776	NA	FALSE
35	0.000913947	0.00365297	0.775351	0.421053	0.354298	TRUE	1.55723	2 vs 1	0.708597	2 vs 1	0.550702	-0.157895	Tbata:ENSMUST00000143207.7, Tbata:ENSMUST00000035894.11	Tbata	NA	NA	FALSE	FALSE	0.00365297	NA	FALSE
36	0.243303	NA	0.85	0.5	0.35	TRUE	1.7346	2 vs 1	0.7	2 vs 1	0.7	0	Vwa5b2:ENSMUST00000100074.9, Vwa5b2:ENSMUST00000096197.10	Vwa5b2	NA	NA	FALSE	FALSE	0.243303	NA	FALSE
37	9.96211e-10	NA	0.373279	0.025641	0.347638	TRUE	3.11941	2 vs 1	0.695277	2 vs 1	-0.253441	-0.948718	Pclo:ENSMUST00000182407.7, Pclo:ENSMUST00000030691.16	Pclo	NA	NA	FALSE	FALSE	9.96211e-10	NA	FALSE
38	0.268596	NA	0.714286	0.375	0.339286	TRUE	1.42712	1 vs 2	0.678571	1 vs 2	0.428571	-0.25	Ankrd33b:ENSMUST00000123325.8, Ankrd33b:ENSMUST00000076942.4	Ankrd33b	NA	NA	FALSE	FALSE	0.268596	NA	FALSE
39	1.65227e-05	NA	0.452137	0.113636	0.338501	TRUE	1.86208	2 vs 1	0.677002	2 vs 1	-0.0957255	-0.772727	Rasgrp2:ENSMUST00000113469.2, Rasgrp2:ENSMUST00000035716.14	Rasgrp2	NA	NA	FALSE	FALSE	1.65227e-05	NA	FALSE
40	0.622008	NA	0.333333	0	0.333333	TRUE	Inf	2 vs 1	0.666667	2 vs 1	-0.333333	-1	Retn:ENSMUST00000169234.2, Retn:ENSMUST00000012849.14	Retn	NA	NA	FALSE	FALSE	0.622008	NA	FALSE
41	0.70766	NA	1	0.666667	0.333333	TRUE	Inf	2 vs 1	0.666667	2 vs 1	1	0.333333	Vwf:ENSMUST00000112253.5, Vwf:ENSMUST00000112254.7	Vwf	NA	NA	FALSE	FALSE	0.70766	NA	FALSE
42	2.40685e-69	5.63387e-78	0.498026	0.167546	0.33048	FALSE	1.59522	2 vs 1	0.660959	2 vs 1	-0.00394841	-0.664908	Itsn1:ENSMUST00000056482.13, Itsn1:ENSMUST00000114002.8	Itsn1	3.1461e-68	8.18038e-77	TRUE	TRUE	2.40685e-69	3.3881e-68	TRUE
43	7.30556e-62	1.26943e-50	0.76868	0.441397	0.327283	TRUE	1.43637	1 vs 2	0.654566	1 vs 2	0.537359	-0.117207	Wdr37:ENSMUST00000054251.12, Wdr37:ENSMUST00000176922.7	Wdr37	NA	NA	FALSE	FALSE	1.26943e-50	NA	FALSE
44	2.9201e-107	1.4256e-121	0.335505	0.0113086	0.324196	FALSE	3.78743	2 vs 1	0.648393	2 vs 1	-0.32899	-0.977383	Rdx:ENSMUST00000163153.8, Rdx:ENSMUST00000238858.1	Rdx	5.34379e-106	4.70449e-120	TRUE	TRUE	2.9201e-107	7.63398e-106	TRUE
45	1.69524e-46	4.00018e-36	0.841346	0.51875	0.322596	TRUE	1.59324	1 vs 2	0.645192	1 vs 2	0.682692	0.0375	Mbtps2:ENSMUST00000058098.14, Mbtps2:ENSMUST00000112522.8	Mbtps2	NA	NA	FALSE	FALSE	4.00018e-36	NA	FALSE
46	2.56506e-11	NA	0.581062	0.259542	0.32152	TRUE	1.37548	2 vs 1	0.643039	2 vs 1	0.162123	-0.480916	Mbd2:ENSMUST00000114946.3, Mbd2:ENSMUST00000074058.10	Mbd2	NA	NA	FALSE	FALSE	2.56506e-11	NA	FALSE
47	0.00785821	NA	0.933638	0.625	0.308638	TRUE	2.13315	2 vs 1	0.617277	2 vs 1	0.867277	0.25	Cpne4:ENSMUST00000098443.8, Cpne4:ENSMUST00000057742.14	Cpne4	NA	NA	FALSE	FALSE	0.00785821	NA	FALSE
48	0.112037	NA	0.7	0.4	0.3	TRUE	1.25276	2 vs 1	0.6	2 vs 1	0.4	-0.2	Irak4:ENSMUST00000074936.9, Irak4:ENSMUST00000109248.1	Irak4	NA	NA	FALSE	FALSE	0.112037	NA	FALSE
49	1	NA	0.3	0	0.3	TRUE	Inf	1 vs 2	0.6	1 vs 2	-0.4	-1	Neurl3:ENSMUST00000056946.7, Neurl3:ENSMUST00000188666.2	Neurl3	NA	NA	FALSE	FALSE	1	NA	FALSE
50	0.278565	NA	0.296875	0	0.296875	TRUE	Inf	1 vs 2	0.59375	1 vs 2	-0.40625	-1	Aldh1a3:ENSMUST00000015278.14, Aldh1a3:ENSMUST00000174209.7	Aldh1a3	NA	NA	FALSE	FALSE	0.278565	NA	FALSE
51	0	1.20252e-232	0.991413	0.698046	0.293367	FALSE	3.91092	2 vs 1	0.586734	2 vs 1	0.982827	0.396092	Ap1s2:ENSMUST00000112294.8, Ap1s2:ENSMUST00000069041.14	Ap1s2	0	5.45643e-231	TRUE	TRUE	1.20252e-232	5.50152e-231	TRUE
52	0.0262323	NA	0.542484	0.25	0.292484	TRUE	1.26896	2 vs 1	0.584967	2 vs 1	0.0849673	-0.5	Fbxl21:ENSMUST00000121095.7, Fbxl21:ENSMUST00000121871.7	Fbxl21	NA	NA	FALSE	FALSE	0.0262323	NA	FALSE
53	0.284205	NA	0.786885	0.5	0.286885	TRUE	1.30625	2 vs 1	0.57377	2 vs 1	0.57377	0	Kndc1:ENSMUST00000121839.1, Kndc1:ENSMUST00000053445.15	Kndc1	NA	NA	FALSE	FALSE	0.284205	NA	FALSE
54	0.160441	NA	0.44	0.153846	0.286154	TRUE	1.46359	1 vs 2	0.572308	1 vs 2	-0.12	-0.692308	Spats1:ENSMUST00000233769.1, Spats1:ENSMUST00000024731.8	Spats1	NA	NA	FALSE	FALSE	0.160441	NA	FALSE
55	0.00215471	NA	0.68258	0.4	0.28258	TRUE	1.17112	1 vs 2	0.565159	1 vs 2	0.365159	-0.2	Pcsk5:ENSMUST00000025618.15, Pcsk5:ENSMUST00000050715.9	Pcsk5	NA	NA	FALSE	FALSE	0.00215471	NA	FALSE
56	0.0953364	NA	0.85	0.681818	0.168182	TRUE	1.37432	3 vs 2	0.563636	3 vs 2	0.563636	0	Ripor2:ENSMUST00000058009.15, Ripor2:ENSMUST00000091694.9, Ripor2:ENSMUST00000110383.7	Ripor2	NA	NA	FALSE	FALSE	0.0953364	NA	FALSE
57	0.0702256	NA	0.35	0.0714286	0.278571	TRUE	1.94591	1 vs 2	0.557143	1 vs 2	-0.3	-0.857143	Sorcs1:ENSMUST00000209413.1, Sorcs1:ENSMUST00000211687.1	Sorcs1	NA	NA	FALSE	FALSE	0.0702256	NA	FALSE
58	1.93215e-66	8.60072e-64	0.445006	0.169949	0.275057	FALSE	1.36512	1 vs 2	0.550114	1 vs 2	-0.109988	-0.660102	Bcl7c:ENSMUST00000205977.1, Bcl7c:ENSMUST00000207019.1	Bcl7c	2.43851e-65	1.11502e-62	TRUE	TRUE	8.60072e-64	1.12424e-62	TRUE
59	0.275986	NA	0.7	0.428571	0.271429	TRUE	1.13498	1 vs 2	0.542857	1 vs 2	0.4	-0.142857	Hecw2:ENSMUST00000120904.7, Hecw2:ENSMUST00000097741.2	Hecw2	NA	NA	FALSE	FALSE	0.275986	NA	FALSE
60	0.350953	NA	0.27027	0	0.27027	TRUE	Inf	2 vs 1	0.540541	2 vs 1	-0.459459	-1	Dnhd1:ENSMUST00000106776.3, Dnhd1:ENSMUST00000145988.8	Dnhd1	NA	NA	FALSE	FALSE	0.350953	NA	FALSE
61	0.793741	NA	0.59375	0.333333	0.260417	TRUE	1.07264	1 vs 2	0.520833	1 vs 2	0.1875	-0.333333	Cpne8:ENSMUST00000064391.11, Cpne8:ENSMUST00000014777.8	Cpne8	NA	NA	FALSE	FALSE	0.793741	NA	FALSE
62	7.88676e-193	1.21432e-127	0.88684	0.630229	0.256611	FALSE	1.52566	2 vs 1	0.513223	2 vs 1	0.77368	0.260457	Gnao1:ENSMUST00000138659.8, Gnao1:ENSMUST00000125716.7	Gnao1	2.88655e-191	4.40799e-126	TRUE	TRUE	1.21432e-127	4.44441e-126	TRUE
63	0.465387	NA	0.255319	0	0.255319	TRUE	Inf	2 vs 1	0.510638	2 vs 1	-0.489362	-1	Lgi3:ENSMUST00000226548.1, Lgi3:ENSMUST00000047331.7	Lgi3	NA	NA	FALSE	FALSE	0.465387	NA	FALSE
64	0.290953	NA	0.503401	0.25	0.253401	TRUE	1.11222	2 vs 1	0.506803	2 vs 1	0.00680272	-0.5	Adamts2:ENSMUST00000142118.2, Adamts2:ENSMUST00000040523.8	Adamts2	NA	NA	FALSE	FALSE	0.290953	NA	FALSE
65	0.162507	NA	0.965517	0.714286	0.251232	TRUE	2.41591	1 vs 2	0.502463	1 vs 2	0.931034	0.428571	Epb41l4b:ENSMUST00000095076.9, Epb41l4b:ENSMUST00000030142.3	Epb41l4b	NA	NA	FALSE	FALSE	0.162507	NA	FALSE
66	0.00747595	NA	0.839286	0.590909	0.248377	TRUE	1.2852	2 vs 1	0.496753	2 vs 1	0.678571	0.181818	Nyap2:ENSMUST00000113494.8, Nyap2:ENSMUST00000123285.1	Nyap2	NA	NA	FALSE	FALSE	0.00747595	NA	FALSE
67	0.000133649	NA	0.675926	0.431818	0.244108	TRUE	1.00955	1 vs 2	0.488215	1 vs 2	0.351852	-0.136364	Zbtb46:ENSMUST00000029106.12, Zbtb46:ENSMUST00000087409.9	Zbtb46	NA	NA	FALSE	FALSE	0.000133649	NA	FALSE
68	0.0140943	NA	0.869767	0.631579	0.238188	TRUE	1.35991	2 vs 1	0.476377	2 vs 1	0.739535	0.263158	Ncam2:ENSMUST00000037785.13, Ncam2:ENSMUST00000067602.4	Ncam2	NA	NA	FALSE	FALSE	0.0140943	NA	FALSE
69	2.11939e-14	NA	0.410109	0.176271	0.233838	TRUE	1.1783	1 vs 2	0.467676	1 vs 2	-0.179781	-0.647458	Gls:ENSMUST00000114513.8, Gls:ENSMUST00000114510.7	Gls	NA	NA	FALSE	FALSE	2.11939e-14	NA	FALSE
70	1.385e-50	6.8949e-47	0.645627	0.573794	0.0718329	FALSE	1.09707	3 vs 2	0.459049	3 vs 2	0.0295311	-0.429518	Septin11:ENSMUST00000201700.3, Septin11:ENSMUST00000074733.10, Septin11:ENSMUST00000201421.3	Septin11	1.33397e-49	6.41756e-46	TRUE	TRUE	6.8949e-47	6.82036e-46	TRUE
71	1.93948e-10	NA	0.690733	0.462555	0.228178	TRUE	0.953608	2 vs 1	0.456355	2 vs 1	0.381466	-0.0748899	Mbd5:ENSMUST00000112745.7, Mbd5:ENSMUST00000047413.9	Mbd5	NA	NA	FALSE	FALSE	1.93948e-10	NA	FALSE
72	2.66871e-05	0.000489901	0.539726	0.31405	0.225676	TRUE	0.940494	2 vs 1	0.451353	2 vs 1	0.0794521	-0.371901	Map7d2:ENSMUST00000112470.2, Map7d2:ENSMUST00000112471.8	Map7d2	NA	NA	FALSE	FALSE	0.000489901	NA	FALSE
73	0.192504	NA	0.531429	0.307692	0.223736	TRUE	0.93681	1 vs 2	0.447473	1 vs 2	0.0628571	-0.384615	Prrt3:ENSMUST00000204268.2, Prrt3:ENSMUST00000205170.1	Prrt3	NA	NA	FALSE	FALSE	0.192504	NA	FALSE
74	0.0486667	NA	0.52	0.3	0.22	TRUE	Inf	1 vs 2	0.44	1 vs 3	0.04	-0.4	Rgs9:ENSMUST00000020920.9, Rgs9:ENSMUST00000106706.7, Rgs9:ENSMUST00000106704.2	Rgs9	NA	NA	FALSE	FALSE	0.0486667	NA	FALSE
75	3.96571e-18	3.88415e-20	0.841886	0.622	0.219886	TRUE	1.17428	2 vs 1	0.439773	2 vs 1	0.683773	0.244	Cflar:ENSMUST00000114309.7, Cflar:ENSMUST00000114313.7	Cflar	NA	NA	FALSE	FALSE	3.96571e-18	NA	FALSE
76	7.3981e-42	2.2967e-41	0.422898	0.204425	0.218473	FALSE	1.04798	1 vs 2	0.436947	1 vs 2	-0.154204	-0.59115	Atp2a2:ENSMUST00000177974.7, Atp2a2:ENSMUST00000031423.9	Atp2a2	6.01712e-41	1.85268e-40	TRUE	TRUE	2.2967e-41	1.95487e-40	TRUE
77	5.39954e-106	9.40039e-110	0.617342	0.400745	0.216597	FALSE	1.43308	1 vs 3	0.433194	1 vs 3	0.234685	-0.198509	Tpm1:ENSMUST00000113690.7, Tpm1:ENSMUST00000113685.9, Tpm1:ENSMUST00000030185.4	Tpm1	9.41063e-105	2.27489e-108	TRUE	TRUE	5.39954e-106	1.31749e-104	TRUE
78	3.47095e-24	6.68755e-19	0.774791	0.563444	0.211347	TRUE	0.980412	2 vs 1	0.422694	2 vs 1	0.549582	0.126888	Mtor:ENSMUST00000057580.7, Mtor:ENSMUST00000103221.9	Mtor	NA	NA	FALSE	FALSE	6.68755e-19	NA	FALSE
79	3.46438e-37	1.88931e-42	0.336269	0.12766	0.20861	FALSE	1.24185	2 vs 1	0.41722	2 vs 1	-0.327461	-0.744681	Umad1:ENSMUST00000162034.7, Umad1:ENSMUST00000159335.7	Umad1	2.58768e-36	1.59493e-41	TRUE	TRUE	3.46438e-37	2.75644e-36	TRUE
80	0.777914	0.643475	0.875	0.666667	0.208333	TRUE	1.25276	1 vs 2	0.416667	1 vs 2	0.75	0.333333	Mylk3:ENSMUST00000034133.13, Mylk3:ENSMUST00000121972.7	Mylk3	NA	NA	FALSE	FALSE	0.777914	NA	FALSE
81	0.0300654	NA	0.624	0.422222	0.201778	TRUE	0.820219	1 vs 2	0.403556	1 vs 2	0.248	-0.155556	Prdm9:ENSMUST00000167994.9, Prdm9:ENSMUST00000147532.7	Prdm9	NA	NA	FALSE	FALSE	0.0300654	NA	FALSE
82	0.0391759	NA	0.88515	0.6875	0.19765	TRUE	1.25367	2 vs 1	0.395299	2 vs 1	0.770299	0.375	Kirrel3:ENSMUST00000190549.6, Kirrel3:ENSMUST00000187625.6	Kirrel3	NA	NA	FALSE	FALSE	0.0391759	NA	FALSE
83	1.0132e-10	NA	0.22589	0.0294118	0.196478	TRUE	2.26484	1 vs 2	0.392956	1 vs 2	-0.54822	-0.941176	Pde4dip:ENSMUST00000168438.8, Pde4dip:ENSMUST00000045243.14	Pde4dip	NA	NA	FALSE	FALSE	1.0132e-10	NA	FALSE
84	5.84855e-29	4.17738e-25	0.745075	0.549875	0.195199	TRUE	0.872347	1 vs 2	0.390399	1 vs 2	0.49015	0.0997506	Zfp467:ENSMUST00000114566.7, Zfp467:ENSMUST00000114559.7	Zfp467	NA	NA	FALSE	FALSE	4.17738e-25	NA	FALSE
85	0.0290165	NA	0.694737	0.5	0.194737	TRUE	0.822359	2 vs 1	0.389474	2 vs 1	0.389474	0	Zkscan7:ENSMUST00000215872.1, Zkscan7:ENSMUST00000063980.7	Zkscan7	NA	NA	FALSE	FALSE	0.0290165	NA	FALSE
86	2.45994e-09	6.70934e-07	0.426678	0.238562	0.188116	TRUE	0.86516	2 vs 1	0.376231	2 vs 1	-0.146645	-0.522876	Snx29:ENSMUST00000122168.7, Snx29:ENSMUST00000180792.7	Snx29	NA	NA	FALSE	FALSE	6.70934e-07	NA	FALSE
87	2.54431e-06	4.69695e-05	0.820879	0.634615	0.186264	TRUE	0.970248	1 vs 2	0.372528	1 vs 2	0.641759	0.269231	Hspa12a:ENSMUST00000066285.5, Hspa12a:ENSMUST00000235263.1	Hspa12a	NA	NA	FALSE	FALSE	4.69695e-05	NA	FALSE
88	0.123534	NA	0.872549	0.6875	0.185049	TRUE	1.13523	2 vs 1	0.370098	2 vs 1	0.745098	0.375	Gad1:ENSMUST00000130998.7, Gad1:ENSMUST00000094934.10	Gad1	NA	NA	FALSE	FALSE	0.123534	NA	FALSE
89	5.86126e-10	1.88335e-10	0.583221	0.401099	0.182122	TRUE	0.736897	1 vs 2	0.364243	1 vs 2	0.166441	-0.197802	Map3k10:ENSMUST00000036453.13, Map3k10:ENSMUST00000138243.1	Map3k10	NA	NA	FALSE	FALSE	5.86126e-10	NA	FALSE
90	0.585024	NA	1	0.818182	0.181818	TRUE	Inf	2 vs 1	0.363636	2 vs 1	1	0.636364	Mdfic:ENSMUST00000125326.7, Mdfic:ENSMUST00000189359.6	Mdfic	NA	NA	FALSE	FALSE	0.585024	NA	FALSE
91	0.0148364	NA	0.446154	0.269461	0.176693	TRUE	0.781135	1 vs 2	0.353386	1 vs 2	-0.107692	-0.461078	Nfatc2:ENSMUST00000109184.7, Nfatc2:ENSMUST00000171689.7	Nfatc2	NA	NA	FALSE	FALSE	0.0148364	NA	FALSE
92	0.0231198	NA	0.895161	0.71875	0.176411	TRUE	1.20631	1 vs 2	0.352823	1 vs 2	0.790323	0.4375	Tbc1d2b:ENSMUST00000041767.13, Tbc1d2b:ENSMUST00000128874.2	Tbc1d2b	NA	NA	FALSE	FALSE	0.0231198	NA	FALSE
93	2.55323e-50	1.1798e-41	0.817254	0.641132	0.176122	FALSE	0.917571	1 vs 2	0.352244	1 vs 2	0.634508	0.282265	Gabpb1:ENSMUST00000110425.8, Gabpb1:ENSMUST00000039978.12	Gabpb1	2.39611e-49	9.73333e-41	TRUE	TRUE	1.1798e-41	1.02811e-40	TRUE
94	0.000736509	NA	0.873874	0.7	0.173874	TRUE	1.08836	2 vs 1	0.347748	2 vs 1	0.747748	0.4	Hivep3:ENSMUST00000084306.4, Hivep3:ENSMUST00000106307.8	Hivep3	NA	NA	FALSE	FALSE	0.000736509	NA	FALSE
95	0	4.33463e-289	0.900234	0.726955	0.173279	FALSE	1.2206	2 vs 1	0.346558	2 vs 1	0.800468	0.453909	Zwint:ENSMUST00000105431.7, Zwint:ENSMUST00000020081.10	Zwint	0	3.14694e-287	TRUE	TRUE	4.33463e-289	3.17295e-287	TRUE
96	3.60754e-50	2.5313e-53	0.444305	0.27391	0.170395	TRUE	1.66952	1 vs 3	0.34079	1 vs 3	-0.11139	-0.452181	Lamp2:ENSMUST00000074913.11, Lamp2:ENSMUST00000016678.13, Lamp2:ENSMUST00000061755.8	Lamp2	NA	NA	FALSE	FALSE	3.60754e-50	NA	FALSE
97	7.68731e-57	3.91589e-50	0.909061	0.740355	0.168706	FALSE	1.25441	2 vs 1	0.337413	2 vs 1	0.818122	0.480709	Fgfr1op2:ENSMUST00000037836.11, Fgfr1op2:ENSMUST00000067404.12	Fgfr1op2	8.03873e-56	3.94852e-49	TRUE	TRUE	3.91589e-50	4.21534e-49	TRUE
98	5.96407e-42	1.46607e-35	0.701111	0.534336	0.166775	FALSE	0.715033	2 vs 1	0.33355	2 vs 1	0.402221	0.0686717	Cacna2d1:ENSMUST00000196750.1, Cacna2d1:ENSMUST00000167946.8	Cacna2d1	4.96102e-41	1.13231e-34	TRUE	TRUE	1.46607e-35	1.14166e-34	TRUE
99	0.53438	NA	1	0.833333	0.166667	TRUE	Inf	1 vs 2	0.333333	1 vs 2	1	0.666667	Cfap77:ENSMUST00000189711.6, Cfap77:ENSMUST00000157048.3	Cfap77	NA	NA	FALSE	FALSE	0.53438	NA	FALSE
100	7.47711e-11	2.0088e-09	0.47819	0.380573	0.0976169	TRUE	1.19465	1 vs 2	0.332073	1 vs 2	0.0104167	-0.321656	Paqr3:ENSMUST00000069453.8, Paqr3:ENSMUST00000112969.9, Paqr3:ENSMUST00000112968.1	Paqr3	NA	NA	FALSE	FALSE	2.0088e-09	NA	FALSE
101	0.00026967	NA	0.16545	0	0.16545	TRUE	Inf	1 vs 2	0.3309	1 vs 2	-0.6691	-1	Armc2:ENSMUST00000160262.8, Armc2:ENSMUST00000162405.7	Armc2	NA	NA	FALSE	FALSE	0.00026967	NA	FALSE
102	0.283309	NA	0.785714	0.625	0.160714	TRUE	0.788457	1 vs 2	0.321429	1 vs 2	0.571429	0.25	Ghr:ENSMUST00000069451.10, Ghr:ENSMUST00000110698.8	Ghr	NA	NA	FALSE	FALSE	0.283309	NA	FALSE
103	1.78073e-07	1.77516e-06	0.771296	0.611913	0.159383	TRUE	0.784592	1 vs 3	0.318766	1 vs 3	0.542593	0.223827	Dixdc1:ENSMUST00000034566.14, Dixdc1:ENSMUST00000120622.1, Dixdc1:ENSMUST00000117093.1	Dixdc1	NA	NA	FALSE	FALSE	1.77516e-06	NA	FALSE
104	6.76338e-25	5.44873e-23	0.743842	0.664868	0.0789744	FALSE	0.770328	3 vs 2	0.31645	3 vs 2	0.349816	0.033366	Ccdc88a:ENSMUST00000109477.1, Ccdc88a:ENSMUST00000239407.1, Ccdc88a:ENSMUST00000040182.12	Ccdc88a	4.19559e-24	3.66276e-22	TRUE	TRUE	5.44873e-23	3.69303e-22	TRUE
105	7.91526e-13	2.42698e-09	0.814729	0.657143	0.157586	TRUE	0.830446	1 vs 2	0.315172	1 vs 2	0.629457	0.314286	Crem:ENSMUST00000151311.7, Crem:ENSMUST00000149803.7	Crem	NA	NA	FALSE	FALSE	2.42698e-09	NA	FALSE
106	1.42959e-06	0.00162993	0.620447	0.46319	0.157256	TRUE	0.63895	2 vs 1	0.314513	2 vs 1	0.240893	-0.0736196	Efl1:ENSMUST00000207868.1, Efl1:ENSMUST00000179489.7	Efl1	NA	NA	FALSE	FALSE	0.00162993	NA	FALSE
107	0.526921	NA	0.823529	0.666667	0.156863	TRUE	0.847298	2 vs 1	0.313725	2 vs 1	0.647059	0.333333	Lrrc9:ENSMUST00000161284.2, Lrrc9:ENSMUST00000162159.7	Lrrc9	NA	NA	FALSE	FALSE	0.526921	NA	FALSE
108	5.60839e-11	1.15676e-05	0.691667	0.536885	0.154781	TRUE	0.660113	2 vs 1	0.309563	2 vs 1	0.383333	0.0737705	Gm4924:ENSMUST00000165906.1, Gm4924:ENSMUST00000211099.1	Gm4924	NA	NA	FALSE	FALSE	1.15676e-05	NA	FALSE
109	1.06035e-06	7.02109e-07	0.359675	0.205769	0.153906	TRUE	0.907843	3 vs 1	0.307812	3 vs 1	-0.280649	-0.588462	Cdkl3:ENSMUST00000109077.8, Cdkl3:ENSMUST00000109078.7, Cdkl3:ENSMUST00000121591.7	Cdkl3	NA	NA	FALSE	FALSE	1.06035e-06	NA	FALSE
110	0.0166166	NA	0.473344	0.32	0.153344	TRUE	0.647047	1 vs 2	0.306688	1 vs 2	-0.0533118	-0.36	Wdr17:ENSMUST00000144711.8, Wdr17:ENSMUST00000129132.2	Wdr17	NA	NA	FALSE	FALSE	0.0166166	NA	FALSE
111	1.57165e-126	6.26618e-86	0.974381	0.82121	0.153171	FALSE	2.1139	1 vs 2	0.306342	1 vs 2	0.948762	0.64242	Ppp3cb:ENSMUST00000159027.7, Ppp3cb:ENSMUST00000161989.1	Ppp3cb	4.10875e-125	1.03392e-84	TRUE	TRUE	6.26618e-86	1.04246e-84	TRUE
112	4.75536e-11	9.37986e-10	0.62527	0.472469	0.152801	TRUE	0.622212	2 vs 1	0.305601	2 vs 1	0.250539	-0.0550622	Ccpg1:ENSMUST00000150826.8, Ccpg1:ENSMUST00000037977.14	Ccpg1	NA	NA	FALSE	FALSE	9.37986e-10	NA	FALSE
113	1	NA	0.818182	0.666667	0.151515	TRUE	0.81093	2 vs 1	0.30303	2 vs 1	0.636364	0.333333	Irf5:ENSMUST00000004392.11, Irf5:ENSMUST00000167252.4	Irf5	NA	NA	FALSE	FALSE	1	NA	FALSE
114	0.0779027	NA	0.793651	0.642857	0.150794	TRUE	0.759287	2 vs 1	0.301587	2 vs 1	0.587302	0.285714	Acot6:ENSMUST00000222921.1, Acot6:ENSMUST00000056822.3	Acot6	NA	NA	FALSE	FALSE	0.0779027	NA	FALSE
115	0.0138983	NA	0.277108	0.126582	0.150526	TRUE	0.972671	1 vs 2	0.301052	1 vs 2	-0.445783	-0.746835	Prss41:ENSMUST00000024926.13, Prss41:ENSMUST00000151797.2	Prss41	NA	NA	FALSE	FALSE	0.0138983	NA	FALSE
116	6.56332e-39	2.94184e-28	0.91013	0.760766	0.149365	FALSE	1.15834	2 vs 1	0.298729	2 vs 1	0.82026	0.521531	Dlg4:ENSMUST00000231221.1, Dlg4:ENSMUST00000231415.1	Dlg4	5.00453e-38	2.13578e-27	TRUE	TRUE	2.94184e-28	2.19738e-27	TRUE
117	5.12087e-23	8.75261e-19	0.737677	0.589147	0.148529	FALSE	0.673486	1 vs 2	0.297059	1 vs 2	0.475353	0.178295	Tut7:ENSMUST00000071703.5, Tut7:ENSMUST00000225576.1	Tut7	2.88344e-22	4.73253e-18	TRUE	TRUE	8.75261e-19	4.84286e-18	TRUE
118	1.06279e-08	3.62337e-08	0.775992	0.628571	0.147421	TRUE	0.71637	2 vs 1	0.294842	2 vs 1	0.551985	0.257143	Kdm3b:ENSMUST00000224715.1, Kdm3b:ENSMUST00000043775.8	Kdm3b	NA	NA	FALSE	FALSE	3.62337e-08	NA	FALSE
119	0.170597	NA	0.66087	0.514286	0.146584	TRUE	0.610013	1 vs 2	0.293168	1 vs 2	0.321739	0.0285714	Polr3g:ENSMUST00000048993.11, Polr3g:ENSMUST00000161920.1	Polr3g	NA	NA	FALSE	FALSE	0.170597	NA	FALSE
120	0.0268343	0.0831132	0.438356	0.292308	0.146048	TRUE	0.636366	1 vs 2	0.292097	1 vs 2	-0.123288	-0.415385	Rassf4:ENSMUST00000035842.6, Rassf4:ENSMUST00000203029.2	Rassf4	NA	NA	FALSE	FALSE	0.0831132	NA	FALSE
121	2.84877e-113	3.20696e-85	0.854983	0.710912	0.144071	FALSE	0.87441	2 vs 1	0.288141	2 vs 1	0.709965	0.421824	Thra:ENSMUST00000103139.10, Thra:ENSMUST00000064187.11	Thra	5.48763e-112	5.06142e-84	TRUE	TRUE	3.20696e-85	5.10325e-84	TRUE
122	2.10319e-07	9.87878e-07	0.187629	0.0443548	0.143274	TRUE	1.60467	2 vs 1	0.286548	2 vs 1	-0.624742	-0.91129	Klhl15:ENSMUST00000096369.9, Klhl15:ENSMUST00000113915.1	Klhl15	NA	NA	FALSE	FALSE	9.87878e-07	NA	FALSE
123	0.489224	NA	0.777778	0.636364	0.141414	TRUE	0.693147	1 vs 2	0.282828	1 vs 2	0.555556	0.272727	Fgd3:ENSMUST00000110087.8, Fgd3:ENSMUST00000110086.1	Fgd3	NA	NA	FALSE	FALSE	0.489224	NA	FALSE
124	0.308953	NA	0.754717	0.615385	0.139332	TRUE	0.653926	1 vs 2	0.278665	1 vs 2	0.509434	0.230769	Cadps2:ENSMUST00000166458.8, Cadps2:ENSMUST00000115356.2	Cadps2	NA	NA	FALSE	FALSE	0.308953	NA	FALSE
125	0.719769	NA	0.25	0.111111	0.138889	TRUE	0.980829	2 vs 1	0.277778	2 vs 1	-0.5	-0.777778	Strip2:ENSMUST00000115224.7, Strip2:ENSMUST00000046028.11	Strip2	NA	NA	FALSE	FALSE	0.719769	NA	FALSE
126	4.98027e-23	NA	0.988938	0.851064	0.137874	TRUE	2.75015	2 vs 1	0.275748	2 vs 1	0.977876	0.702128	Scn8a:ENSMUST00000096198.9, Scn8a:ENSMUST00000108909.8	Scn8a	NA	NA	FALSE	FALSE	4.98027e-23	NA	FALSE
127	1.18375e-23	8.57004e-16	0.758492	0.62253	0.135962	FALSE	0.644128	1 vs 2	0.271924	1 vs 2	0.516983	0.245059	Cinp:ENSMUST00000043716.8, Cinp:ENSMUST00000222457.1	Cinp	7.10252e-23	4.26154e-15	TRUE	TRUE	8.57004e-16	4.29676e-15	TRUE
128	0.0932567	NA	0.1341	0	0.1341	TRUE	Inf	1 vs 2	0.268199	1 vs 2	-0.731801	-1	Cyp2u1:ENSMUST00000106337.6, Cyp2u1:ENSMUST00000200236.1	Cyp2u1	NA	NA	FALSE	FALSE	0.0932567	NA	FALSE
129	3.395e-06	1.79556e-05	0.445209	0.312329	0.13288	TRUE	0.569207	1 vs 2	0.265761	1 vs 2	-0.109582	-0.375342	Kcnh7:ENSMUST00000075052.9, Kcnh7:ENSMUST00000112454.7	Kcnh7	NA	NA	FALSE	FALSE	1.79556e-05	NA	FALSE
130	0.000556778	0.00119668	0.589954	0.485915	0.104039	TRUE	0.849482	1 vs 2	0.26356	1 vs 2	0.326941	0.0633803	Slc35f4:ENSMUST00000138884.7, Slc35f4:ENSMUST00000123534.1, Slc35f4:ENSMUST00000146164.1	Slc35f4	NA	NA	FALSE	FALSE	0.00119668	NA	FALSE
131	3.56365e-60	2.1654e-60	0.22731	0.0960598	0.131251	FALSE	1.01823	2 vs 1	0.262501	2 vs 1	-0.545379	-0.80788	Eif4e2:ENSMUST00000113233.7, Eif4e2:ENSMUST00000113235.7	Eif4e2	3.95241e-59	2.62013e-59	TRUE	TRUE	3.56365e-60	4.34765e-59	TRUE
132	1.6128e-05	NA	0.167404	0.0363636	0.13104	TRUE	1.673	2 vs 1	0.26208	2 vs 1	-0.665193	-0.927273	Lrrtm4:ENSMUST00000136421.1, Lrrtm4:ENSMUST00000147663.7	Lrrtm4	NA	NA	FALSE	FALSE	1.6128e-05	NA	FALSE
133	6.45871e-09	4.09875e-08	0.724038	0.597122	0.126915	TRUE	0.571091	1 vs 2	0.253831	1 vs 2	0.448076	0.194245	2510009E07Rik:ENSMUST00000053336.7, 2510009E07Rik:ENSMUST00000231592.1	2510009E07Rik	NA	NA	FALSE	FALSE	4.09875e-08	NA	FALSE
134	1.61309e-06	4.37948e-06	0.234663	0.107955	0.126708	TRUE	0.929639	2 vs 1	0.253416	2 vs 1	-0.530675	-0.784091	Lrrcc1:ENSMUST00000169079.7, Lrrcc1:ENSMUST00000108370.8	Lrrcc1	NA	NA	FALSE	FALSE	4.37948e-06	NA	FALSE
135	3.95021e-05	5.80192e-05	0.701531	0.575658	0.125873	TRUE	0.549624	1 vs 2	0.251745	1 vs 2	0.403061	0.151316	Ttbk1:ENSMUST00000047034.8, Ttbk1:ENSMUST00000225808.1	Ttbk1	NA	NA	FALSE	FALSE	5.80192e-05	NA	FALSE
136	2.19003e-05	NA	0.893162	0.769231	0.123932	TRUE	0.919486	1 vs 2	0.247863	1 vs 2	0.786325	0.538462	Foxo3:ENSMUST00000105502.7, Foxo3:ENSMUST00000105501.1	Foxo3	NA	NA	FALSE	FALSE	2.19003e-05	NA	FALSE
137	1.51415e-137	9.18578e-119	0.697327	0.574194	0.123133	FALSE	0.703607	1 vs 3	0.246267	1 vs 3	0.394655	0.148388	Mkrn1:ENSMUST00000114823.7, Mkrn1:ENSMUST00000051671.10, Mkrn1:ENSMUST00000114822.1	Mkrn1	4.26292e-136	2.56495e-117	TRUE	TRUE	9.18578e-119	2.80166e-117	TRUE
138	0.0117661	NA	0.872449	0.75	0.122449	TRUE	0.824175	1 vs 2	0.244898	1 vs 2	0.744898	0.5	Pm20d2:ENSMUST00000098181.8, Pm20d2:ENSMUST00000119167.1	Pm20d2	NA	NA	FALSE	FALSE	0.0117661	NA	FALSE
139	1.84264e-08	9.55419e-08	0.406812	0.28475	0.122062	TRUE	0.54386	1 vs 2	0.244124	1 vs 2	-0.186375	-0.430499	St8sia4:ENSMUST00000043336.10, St8sia4:ENSMUST00000189556.1	St8sia4	NA	NA	FALSE	FALSE	9.55419e-08	NA	FALSE
140	3.82257e-09	1.99482e-09	0.27727	0.155932	0.121338	TRUE	0.730769	1 vs 2	0.242676	1 vs 2	-0.445459	-0.688136	Ccdc9:ENSMUST00000118976.8, Ccdc9:ENSMUST00000041010.14	Ccdc9	NA	NA	FALSE	FALSE	3.82257e-09	NA	FALSE
141	7.07175e-07	1.01805e-05	0.711111	0.590164	0.120947	TRUE	0.536143	1 vs 2	0.241894	1 vs 2	0.422222	0.180328	Zfp672:ENSMUST00000064786.11, Zfp672:ENSMUST00000065533.2	Zfp672	NA	NA	FALSE	FALSE	1.01805e-05	NA	FALSE
142	9.37641e-16	4.3549e-14	0.767473	0.647153	0.12032	FALSE	0.587546	2 vs 1	0.240639	2 vs 1	0.534945	0.294306	Nsd1:ENSMUST00000224918.1, Nsd1:ENSMUST00000099490.2	Nsd1	4.18508e-15	1.92784e-13	TRUE	TRUE	4.3549e-14	1.94377e-13	TRUE
143	1.65369e-29	7.4467e-28	0.67641	0.663069	0.0133412	FALSE	-0.862715	2 vs 1	0.238935	3 vs 2	0.19226	-0.0466744	Hmg20a:ENSMUST00000214771.1, Hmg20a:ENSMUST00000217518.1, Hmg20a:ENSMUST00000034879.4	Hmg20a	1.18677e-28	5.3003e-27	TRUE	TRUE	7.4467e-28	5.45098e-27	TRUE
144	2.18228e-06	3.20628e-06	0.711681	0.593264	0.118417	TRUE	0.526087	2 vs 1	0.236834	2 vs 1	0.423362	0.186528	Evi5l:ENSMUST00000239400.1, Evi5l:ENSMUST00000176072.8	Evi5l	NA	NA	FALSE	FALSE	3.20628e-06	NA	FALSE
145	0.0058711	NA	0.698276	0.580838	0.117438	TRUE	0.512885	2 vs 1	0.234875	2 vs 1	0.396552	0.161677	Farp2:ENSMUST00000122402.2, Farp2:ENSMUST00000120301.7	Farp2	NA	NA	FALSE	FALSE	0.0058711	NA	FALSE
146	9.66396e-26	6.53615e-29	0.5999	0.537025	0.0628752	FALSE	0.962512	1 vs 3	0.234159	1 vs 2	-0.523377	-0.757536	Stau2:ENSMUST00000162751.7, Stau2:ENSMUST00000159558.7, Stau2:ENSMUST00000115359.9	Stau2	6.20528e-25	4.84209e-28	TRUE	TRUE	9.66396e-26	6.80194e-25	TRUE
147	0.110047	NA	0.116505	0	0.116505	TRUE	Inf	2 vs 1	0.23301	2 vs 1	-0.76699	-1	Grk4:ENSMUST00000074651.10, Grk4:ENSMUST00000001112.13	Grk4	NA	NA	FALSE	FALSE	0.110047	NA	FALSE
148	1.25332e-16	7.5424e-14	0.631203	0.518987	0.112215	FALSE	0.461394	1 vs 2	0.224431	1 vs 2	0.262405	0.0379747	Epc1:ENSMUST00000115870.8, Epc1:ENSMUST00000050542.5	Epc1	5.8065e-16	3.22105e-13	TRUE	TRUE	7.5424e-14	3.28633e-13	TRUE
149	0.853227	NA	0.722222	0.666667	0.0555556	TRUE	0.606136	3 vs 2	0.222222	3 vs 2	0.388889	0.166667	Cp:ENSMUST00000091309.11, Cp:ENSMUST00000108329.7, Cp:ENSMUST00000003714.12	Cp	NA	NA	FALSE	FALSE	0.853227	NA	FALSE
150	4.67544e-08	9.93694e-08	0.604789	0.493793	0.110996	TRUE	0.450287	2 vs 1	0.221991	2 vs 1	0.209577	-0.0124138	Nrp2:ENSMUST00000114155.7, Nrp2:ENSMUST00000102822.8	Nrp2	NA	NA	FALSE	FALSE	9.93694e-08	NA	FALSE
151	0.0908084	0.0708393	0.136275	0.027027	0.109247	TRUE	1.73694	2 vs 1	0.218495	2 vs 1	-0.727451	-0.945946	Frmd3:ENSMUST00000084474.5, Frmd3:ENSMUST00000098006.8	Frmd3	NA	NA	FALSE	FALSE	0.0908084	NA	FALSE
152	5.78486e-40	2.41498e-29	0.925283	0.816653	0.10863	FALSE	1.02256	1 vs 2	0.21726	1 vs 2	0.850566	0.633307	Ntrk3:ENSMUST00000039431.13, Ntrk3:ENSMUST00000039438.8	Ntrk3	4.5048e-39	1.82633e-28	TRUE	TRUE	2.41498e-29	1.84142e-28	TRUE
153	0.000101314	0.00120244	0.664006	0.555556	0.108451	TRUE	0.458056	1 vs 2	0.216902	1 vs 2	0.328013	0.111111	Gm14410:ENSMUST00000133301.7, Gm14410:ENSMUST00000108964.1	Gm14410	NA	NA	FALSE	FALSE	0.00120244	NA	FALSE
154	0.856408	NA	0.513514	0.5	0.0135135	TRUE	#NAME?	2 vs 1	0.216216	3 vs 2	-0.783784	-1	Ankrd55:ENSMUST00000056047.13, Ankrd55:ENSMUST00000168684.1, Ankrd55:ENSMUST00000165593.8	Ankrd55	NA	NA	FALSE	FALSE	0.856408	NA	FALSE
155	0.651995	NA	0.391892	0.318182	0.0737101	TRUE	Inf	3 vs 1	0.213759	2 vs 1	0.486486	0.272727	Lrguk:ENSMUST00000101564.8, Lrguk:ENSMUST00000228187.1, Lrguk:ENSMUST00000070189.9	Lrguk	NA	NA	FALSE	FALSE	0.651995	NA	FALSE
156	1.97338e-47	2.59284e-41	0.804087	0.697229	0.106858	FALSE	0.577901	1 vs 2	0.213716	1 vs 2	0.608175	0.394458	Gm20498:ENSMUST00000164386.7, Gm20498:ENSMUST00000166664.1	Gm20498	1.7616e-46	2.04609e-40	TRUE	TRUE	2.59284e-41	2.15677e-40	TRUE
157	5.23345e-07	NA	0.91725	0.810427	0.106824	TRUE	0.952778	2 vs 1	0.213648	2 vs 1	0.834501	0.620853	Lrfn1:ENSMUST00000189877.6, Lrfn1:ENSMUST00000108288.8	Lrfn1	NA	NA	FALSE	FALSE	5.23345e-07	NA	FALSE
158	0.0130454	NA	0.923246	0.816667	0.106579	TRUE	0.99336	2 vs 1	0.213158	2 vs 1	0.846491	0.633333	Galnt10:ENSMUST00000108846.1, Galnt10:ENSMUST00000066987.13	Galnt10	NA	NA	FALSE	FALSE	0.0130454	NA	FALSE
159	7.2257e-07	NA	0.966292	0.86	0.106292	TRUE	1.54045	1 vs 2	0.212584	1 vs 2	0.932584	0.72	Rrbp1:ENSMUST00000016072.11, Rrbp1:ENSMUST00000037875.5	Rrbp1	NA	NA	FALSE	FALSE	7.2257e-07	NA	FALSE
160	3.53147e-16	4.89266e-15	0.304151	0.241592	0.0625585	FALSE	0.614372	1 vs 3	0.20977	2 vs 3	0.0900861	-0.119683	Ubap2l:ENSMUST00000198322.4, Ubap2l:ENSMUST00000064639.14, Ubap2l:ENSMUST00000090908.10	Ubap2l	1.5957e-15	2.27697e-14	TRUE	TRUE	4.89266e-15	2.29579e-14	TRUE
161	3.50924e-08	4.29972e-07	0.822187	0.718147	0.104041	TRUE	0.595952	1 vs 2	0.208082	1 vs 2	0.644375	0.436293	Kalrn:ENSMUST00000114973.8, Kalrn:ENSMUST00000114963.7	Kalrn	NA	NA	FALSE	FALSE	4.29972e-07	NA	FALSE
162	2.58227e-07	1.75612e-07	0.159512	0.0574413	0.102071	TRUE	1.13597	1 vs 2	0.204142	1 vs 2	-0.680976	-0.885117	Rita1:ENSMUST00000111884.7, Rita1:ENSMUST00000031599.8	Rita1	NA	NA	FALSE	FALSE	2.58227e-07	NA	FALSE
163	1	NA	0.101562	0	0.101562	TRUE	Inf	2 vs 1	0.203125	2 vs 1	-0.796875	-1	Psg16:ENSMUST00000118367.2, Psg16:ENSMUST00000071399.12	Psg16	NA	NA	FALSE	FALSE	1	NA	FALSE
164	1.16681e-06	4.66105e-06	0.386713	0.285326	0.101387	TRUE	0.457043	2 vs 1	0.202774	2 vs 1	-0.226574	-0.429348	Dnm2:ENSMUST00000072362.13, Dnm2:ENSMUST00000165766.8	Dnm2	NA	NA	FALSE	FALSE	4.66105e-06	NA	FALSE
165	7.7079e-09	1.07684e-06	0.793981	0.695462	0.098519	TRUE	0.783601	1 vs 3	0.202522	1 vs 2	0.429398	0.226876	Dido1:ENSMUST00000087517.9, Dido1:ENSMUST00000103057.7, Dido1:ENSMUST00000103055.7	Dido1	NA	NA	FALSE	FALSE	1.07684e-06	NA	FALSE
166	0.238516	NA	0.957746	0.857143	0.100604	TRUE	1.32914	1 vs 2	0.201207	1 vs 2	0.915493	0.714286	Adamts3:ENSMUST00000061427.9, Adamts3:ENSMUST00000198151.1	Adamts3	NA	NA	FALSE	FALSE	0.238516	NA	FALSE
167	2.43923e-23	7.15069e-21	0.741309	0.641026	0.100283	FALSE	0.472962	1 vs 2	0.200566	1 vs 2	0.482617	0.282051	Cux1:ENSMUST00000176216.8, Cux1:ENSMUST00000004097.15	Cux1	1.43993e-22	4.18661e-20	TRUE	TRUE	7.15069e-21	4.22121e-20	TRUE
168	3.44498e-15	1.30274e-12	0.829359	0.729102	0.100257	FALSE	0.59102	2 vs 1	0.200514	2 vs 1	0.658718	0.458204	Sirt5:ENSMUST00000221515.1, Sirt5:ENSMUST00000223194.1	Sirt5	1.48337e-14	5.03081e-12	TRUE	TRUE	1.30274e-12	5.18266e-12	TRUE
169	1.11243e-16	1.96122e-15	0.85338	0.753266	0.100115	FALSE	0.645257	1 vs 2	0.200229	1 vs 2	0.70676	0.506531	Qk:ENSMUST00000233645.1, Qk:ENSMUST00000042296.8	Qk	5.21988e-16	9.36741e-15	TRUE	TRUE	1.96122e-15	9.44483e-15	TRUE
170	9.64829e-17	1.0837e-13	0.262591	0.16307	0.0995216	FALSE	0.60302	2 vs 1	0.199043	2 vs 1	-0.474818	-0.673861	Smarcad1:ENSMUST00000204696.2, Smarcad1:ENSMUST00000031984.8	Smarcad1	4.58607e-16	4.5742e-13	FALSE	FALSE	1.0837e-13	4.66627e-13	FALSE
171	1	NA	0.0992556	0	0.0992556	TRUE	Inf	2 vs 1	0.198511	2 vs 1	-0.801489	-1	Rasgrf1:ENSMUST00000189545.1, Rasgrf1:ENSMUST00000034912.5	Rasgrf1	NA	NA	FALSE	FALSE	1	NA	FALSE
172	8.12383e-09	2.60792e-08	0.467612	0.411695	0.0559179	TRUE	0.668894	3 vs 2	0.1977	3 vs 2	-0.0278373	-0.225537	Cklf:ENSMUST00000212433.1, Cklf:ENSMUST00000034342.12, Cklf:ENSMUST00000098464.5	Cklf	NA	NA	FALSE	FALSE	2.60792e-08	NA	FALSE
173	0.522622	0.681093	0.688679	0.590909	0.0977702	TRUE	0.426227	1 vs 2	0.19554	1 vs 2	0.377358	0.181818	Gm45844:ENSMUST00000209833.1, Gm45844:ENSMUST00000210333.1	Gm45844	NA	NA	FALSE	FALSE	0.681093	NA	FALSE
174	0.0123709	0.02332	0.65	0.552995	0.0970046	TRUE	0.406258	2 vs 1	0.194009	2 vs 1	0.3	0.105991	Hook1:ENSMUST00000107083.1, Hook1:ENSMUST00000030306.13	Hook1	NA	NA	FALSE	FALSE	0.02332	NA	FALSE
175	8.22602e-12	5.79154e-11	0.945678	0.85	0.0956776	TRUE	1.12236	2 vs 1	0.191355	2 vs 1	0.891355	0.7	Vti1a:ENSMUST00000225529.1, Vti1a:ENSMUST00000223690.1	Vti1a	NA	NA	FALSE	FALSE	5.79154e-11	NA	FALSE
176	0.571415	NA	0.913428	0.818182	0.0952457	TRUE	0.852145	1 vs 2	0.190491	1 vs 2	0.826855	0.636364	Kctd8:ENSMUST00000054095.5, Kctd8:ENSMUST00000087231.3	Kctd8	NA	NA	FALSE	FALSE	0.571415	NA	FALSE
177	1	NA	0.894737	0.8	0.0947368	TRUE	0.753772	2 vs 1	0.189474	2 vs 1	0.789474	0.6	Pdgfra:ENSMUST00000201711.3, Pdgfra:ENSMUST00000000476.14	Pdgfra	NA	NA	FALSE	FALSE	1	NA	FALSE
178	0.585365	NA	0.156863	0.0625	0.0943627	TRUE	1.02629	1 vs 2	0.188725	1 vs 2	-0.686275	-0.875	Maf:ENSMUST00000069009.6, Maf:ENSMUST00000109104.1	Maf	NA	NA	FALSE	FALSE	0.585365	NA	FALSE
179	0.28693	NA	0.548862	0.454545	0.0943167	TRUE	0.378396	1 vs 2	0.188633	1 vs 2	0.0977242	-0.0909091	Cacna1d:ENSMUST00000112250.5, Cacna1d:ENSMUST00000238675.1	Cacna1d	NA	NA	FALSE	FALSE	0.28693	NA	FALSE
180	0.475066	NA	0.670732	0.576923	0.0938086	TRUE	0.401341	2 vs 1	0.187617	2 vs 1	0.341463	0.153846	Elapor2:ENSMUST00000134991.7, Elapor2:ENSMUST00000115348.8	Elapor2	NA	NA	FALSE	FALSE	0.475066	NA	FALSE
181	1.07587e-05	9.43312e-05	0.756859	0.663837	0.0930215	TRUE	0.455092	2 vs 1	0.186043	2 vs 1	0.513717	0.327674	Gm2007:ENSMUST00000177981.7, Gm2007:ENSMUST00000178133.7	Gm2007	NA	NA	FALSE	FALSE	9.43312e-05	NA	FALSE
182	1.12439e-05	9.3635e-05	0.75712	0.664407	0.092713	TRUE	0.453959	2 vs 1	0.185426	2 vs 1	0.51424	0.328814	Gm11007:ENSMUST00000177700.7, Gm11007:ENSMUST00000178120.7	Gm11007	NA	NA	FALSE	FALSE	9.3635e-05	NA	FALSE
183	3.43323e-06	3.69251e-05	0.73087	0.639309	0.0915613	TRUE	0.563276	1 vs 2	0.183123	1 vs 3	0.46174	0.278618	Txndc11:ENSMUST00000038424.13, Txndc11:ENSMUST00000118362.7, Txndc11:ENSMUST00000118679.1	Txndc11	NA	NA	FALSE	FALSE	3.69251e-05	NA	FALSE
184	1.42169e-05	0.00232096	0.75876	0.667674	0.0910864	TRUE	0.448211	1 vs 2	0.182173	1 vs 2	0.51752	0.335347	Zkscan14:ENSMUST00000031632.8, Zkscan14:ENSMUST00000198959.1	Zkscan14	NA	NA	FALSE	FALSE	0.00232096	NA	FALSE
185	2.09838e-08	4.2517e-08	0.899402	0.808889	0.0905135	TRUE	0.773283	1 vs 3	0.181027	1 vs 3	0.798805	0.617778	Nrg1:ENSMUST00000207470.2, Nrg1:ENSMUST00000208598.1, Nrg1:ENSMUST00000239080.1	Nrg1	NA	NA	FALSE	FALSE	4.2517e-08	NA	FALSE
186	1	NA	0.0892857	0	0.0892857	TRUE	Inf	1 vs 2	0.178571	1 vs 2	-0.821429	-1	Tdrd12:ENSMUST00000193633.5, Tdrd12:ENSMUST00000205407.1	Tdrd12	NA	NA	FALSE	FALSE	1	NA	FALSE
187	0.00194794	0.0164823	0.670794	0.581818	0.0889757	TRUE	1.77659	1 vs 2	0.177951	1 vs 3	0.341588	0.163636	Pid1:ENSMUST00000168574.8, Pid1:ENSMUST00000176720.1, Pid1:ENSMUST00000177458.1	Pid1	NA	NA	FALSE	FALSE	0.0164823	NA	FALSE
188	0.122809	NA	0.127962	0.0416667	0.0862954	TRUE	1.2164	2 vs 1	0.172591	2 vs 1	-0.744076	-0.916667	Speg:ENSMUST00000113590.7, Speg:ENSMUST00000087122.11	Speg	NA	NA	FALSE	FALSE	0.122809	NA	FALSE
189	0.0721122	0.116891	0.514184	0.429224	0.0849607	TRUE	0.341772	2 vs 1	0.169921	2 vs 1	0.0283688	-0.141553	Scrn3:ENSMUST00000112050.1, Scrn3:ENSMUST00000090811.10	Scrn3	NA	NA	FALSE	FALSE	0.116891	NA	FALSE
190	0.00570138	0.0145945	0.591497	0.507042	0.084455	TRUE	0.341987	2 vs 1	0.16891	2 vs 1	0.182994	0.0140845	Gpatch2:ENSMUST00000044812.11, Gpatch2:ENSMUST00000110943.8	Gpatch2	NA	NA	FALSE	FALSE	0.0145945	NA	FALSE
191	0.0873831	0.154953	0.417272	0.333333	0.0839387	TRUE	0.359165	2 vs 1	0.167877	2 vs 1	-0.165456	-0.333333	Kcnc1:ENSMUST00000025202.7, Kcnc1:ENSMUST00000160433.2	Kcnc1	NA	NA	FALSE	FALSE	0.154953	NA	FALSE
192	0.429021	NA	0.4	0.317073	0.0829268	TRUE	0.36179	1 vs 2	0.165854	1 vs 2	-0.2	-0.365854	Marveld3:ENSMUST00000001722.13, Marveld3:ENSMUST00000051430.6	Marveld3	NA	NA	FALSE	FALSE	0.429021	NA	FALSE
193	0.00199724	0.00363327	0.895706	0.812785	0.0829201	TRUE	0.682182	2 vs 1	0.16584	2 vs 1	0.791411	0.625571	Mosmo:ENSMUST00000208454.1, Mosmo:ENSMUST00000060175.7	Mosmo	NA	NA	FALSE	FALSE	0.00363327	NA	FALSE
194	0.265421	NA	0.729282	0.647059	0.0822229	TRUE	0.384846	1 vs 2	0.164446	1 vs 2	0.458564	0.294118	Timp4:ENSMUST00000032462.8, Timp4:ENSMUST00000205131.1	Timp4	NA	NA	FALSE	FALSE	0.265421	NA	FALSE
195	1.16528e-05	0.000937878	0.737991	0.655875	0.082116	FALSE	0.390588	2 vs 1	0.164232	2 vs 1	0.475983	0.311751	Rbm33:ENSMUST00000030920.5, Rbm33:ENSMUST00000059644.12	Rbm33	3.02476e-05	0.00203862	FALSE	FALSE	0.000937878	0.00217255	FALSE
196	0.183567	0.428518	0.827059	0.745098	0.0819608	TRUE	0.492288	1 vs 2	0.163922	1 vs 2	0.654118	0.490196	Pde1a:ENSMUST00000102655.9, Pde1a:ENSMUST00000090756.10	Pde1a	NA	NA	FALSE	FALSE	0.428518	NA	FALSE
197	0.000242536	0.00619567	0.77145	0.690435	0.0810155	TRUE	0.414366	1 vs 2	0.162031	1 vs 2	0.542901	0.38087	Zfp810:ENSMUST00000086278.6, Zfp810:ENSMUST00000215202.1	Zfp810	NA	NA	FALSE	FALSE	0.00619567	NA	FALSE
198	3.14037e-07	3.43197e-06	0.864693	0.784247	0.0804469	TRUE	0.564245	1 vs 2	0.160894	1 vs 2	0.729387	0.568493	Sh2b2:ENSMUST00000196397.4, Sh2b2:ENSMUST00000196447.1	Sh2b2	NA	NA	FALSE	FALSE	3.43197e-06	NA	FALSE
199	0.159481	0.329468	0.666667	0.587156	0.0795107	TRUE	0.340927	1 vs 2	0.159021	1 vs 2	0.333333	0.174312	Mxra7:ENSMUST00000021170.8, Mxra7:ENSMUST00000047715.11	Mxra7	NA	NA	FALSE	FALSE	0.329468	NA	FALSE
200	0.000390791	0.00145539	0.656348	0.595238	0.0611096	TRUE	0.750121	1 vs 3	0.158818	1 vs 2	-0.224515	-0.383333	Gm14326:ENSMUST00000108932.7, Gm14326:ENSMUST00000178829.7, Gm14326:ENSMUST00000108928.1	Gm14326	NA	NA	FALSE	FALSE	0.00145539	NA	FALSE
201	0.0245527	0.0129687	0.730441	0.651198	0.0792434	TRUE	0.387617	1 vs 3	0.158487	1 vs 3	0.460882	0.302395	Cep41:ENSMUST00000031810.14, Cep41:ENSMUST00000169422.7, Cep41:ENSMUST00000115130.2	Cep41	NA	NA	FALSE	FALSE	0.0245527	NA	FALSE
202	0.00116106	0.00982304	0.556931	0.477704	0.0792263	TRUE	0.342889	3 vs 1	0.158453	3 vs 1	0.113861	-0.0445912	Pard3:ENSMUST00000162907.7, Pard3:ENSMUST00000162456.7, Pard3:ENSMUST00000160272.7	Pard3	NA	NA	FALSE	FALSE	0.00982304	NA	FALSE
203	0.000433018	NA	0.920471	0.841328	0.0791429	TRUE	0.780622	2 vs 1	0.158286	2 vs 1	0.840943	0.682657	Eif2ak3:ENSMUST00000162950.1, Eif2ak3:ENSMUST00000034093.14	Eif2ak3	NA	NA	FALSE	FALSE	0.000433018	NA	FALSE
204	4.62929e-06	2.90223e-05	0.159966	0.0809917	0.0789748	TRUE	0.770471	1 vs 2	0.15795	1 vs 2	-0.680067	-0.838017	Taok2:ENSMUST00000071268.10, Taok2:ENSMUST00000117394.1	Taok2	NA	NA	FALSE	FALSE	2.90223e-05	NA	FALSE
205	0.0730261	NA	0.878947	0.8	0.0789474	TRUE	0.596205	1 vs 2	0.157895	1 vs 2	0.757895	0.6	Tyk2:ENSMUST00000001036.10, Tyk2:ENSMUST00000214864.1	Tyk2	NA	NA	FALSE	FALSE	0.0730261	NA	FALSE
206	0.468343	NA	0.145455	0.0666667	0.0787879	TRUE	0.868351	1 vs 2	0.157576	1 vs 2	-0.709091	-0.866667	Tnk1:ENSMUST00000001626.9, Tnk1:ENSMUST00000108626.7	Tnk1	NA	NA	FALSE	FALSE	0.468343	NA	FALSE
207	3.82483e-49	4.79645e-47	0.617241	0.557249	0.0599925	FALSE	0.577901	1 vs 2	0.157132	1 vs 2	0.416155	0.259024	Cox16:ENSMUST00000166723.7, Cox16:ENSMUST00000002757.10, Cox16:ENSMUST00000169124.1	Cox16	3.49971e-48	4.58187e-46	FALSE	FALSE	4.79645e-47	4.87639e-46	FALSE
208	3.20555e-13	1.28532e-10	0.909698	0.832957	0.0767407	FALSE	0.905737	3 vs 1	0.156858	3 vs 2	0.766339	0.609481	Kmt5b:ENSMUST00000113968.8, Kmt5b:ENSMUST00000113970.7, Kmt5b:ENSMUST00000113977.8	Kmt5b	1.23498e-12	4.48628e-10	FALSE	FALSE	1.28532e-10	4.65771e-10	FALSE
209	0.0735416	NA	0.918675	0.84058	0.078095	TRUE	0.761927	1 vs 2	0.15619	1 vs 2	0.837349	0.681159	Ksr1:ENSMUST00000018478.10, Ksr1:ENSMUST00000108264.7	Ksr1	NA	NA	FALSE	FALSE	0.0735416	NA	FALSE
210	0.0271851	0.177552	0.471471	0.448889	0.0225826	TRUE	0.459315	2 vs 1	0.155315	2 vs 1	0.537538	0.382222	Acrbp:ENSMUST00000112413.7, Acrbp:ENSMUST00000112414.7, Acrbp:ENSMUST00000088294.11	Acrbp	NA	NA	FALSE	FALSE	0.177552	NA	FALSE
211	4.12871e-08	2.57227e-07	0.550502	0.473307	0.0771943	FALSE	0.30957	1 vs 2	0.154389	1 vs 2	0.101003	-0.0533854	Tle1:ENSMUST00000074216.13, Tle1:ENSMUST00000107337.7	Tle1	1.22854e-07	7.71682e-07	FALSE	FALSE	2.57227e-07	7.84543e-07	FALSE
212	0.0873167	0.105755	0.26875	0.192308	0.0764423	TRUE	0.434111	2 vs 1	0.152885	2 vs 1	-0.4625	-0.615385	Phka2:ENSMUST00000112377.7, Phka2:ENSMUST00000112380.8	Phka2	NA	NA	FALSE	FALSE	0.105755	NA	FALSE
213	0.000779465	0.00266696	0.515392	0.439394	0.0759983	TRUE	1.61995	1 vs 3	0.151997	1 vs 3	0.0307845	-0.121212	Ankrd42:ENSMUST00000056106.13, Ankrd42:ENSMUST00000118157.7, Ankrd42:ENSMUST00000138267.1	Ankrd42	NA	NA	FALSE	FALSE	0.00266696	NA	FALSE
214	0.00320374	NA	0.125	0.0492424	0.0757576	TRUE	1.01459	1 vs 2	0.151515	1 vs 2	-0.75	-0.901515	Hdac9:ENSMUST00000209902.1, Hdac9:ENSMUST00000239340.1	Hdac9	NA	NA	FALSE	FALSE	0.00320374	NA	FALSE
215	2.32974e-11	5.17769e-09	0.915935	0.840838	0.0750971	FALSE	0.723878	2 vs 1	0.150194	2 vs 1	0.83187	0.681675	Cep70:ENSMUST00000190715.6, Cep70:ENSMUST00000093795.9	Cep70	8.61299e-11	1.66328e-08	FALSE	FALSE	5.17769e-09	1.70724e-08	FALSE
216	0.0063865	NA	0.821734	0.746753	0.0749806	TRUE	0.446768	2 vs 1	0.149961	2 vs 1	0.643468	0.493506	Rapgef6:ENSMUST00000108895.7, Rapgef6:ENSMUST00000102743.9	Rapgef6	NA	NA	FALSE	FALSE	0.0063865	NA	FALSE
217	0.153182	0.359573	0.606322	0.531469	0.0748533	TRUE	0.305836	1 vs 2	0.149707	1 vs 2	0.212644	0.0629371	Tmem241:ENSMUST00000055447.13, Tmem241:ENSMUST00000092075.4	Tmem241	NA	NA	FALSE	FALSE	0.359573	NA	FALSE
218	6.13227e-05	0.000405782	0.573141	0.498537	0.0746049	FALSE	0.300534	2 vs 1	0.14921	2 vs 1	0.146283	-0.00292683	Zfp207:ENSMUST00000108216.7, Zfp207:ENSMUST00000188489.6	Zfp207	0.00015115	0.000944223	FALSE	FALSE	0.000405782	0.000977079	FALSE
219	0.10801	0.0936328	0.65234	0.577778	0.0745622	TRUE	0.315683	2 vs 1	0.149124	2 vs 1	0.30468	0.155556	Slc4a8:ENSMUST00000161564.1, Slc4a8:ENSMUST00000023776.12	Slc4a8	NA	NA	FALSE	FALSE	0.10801	NA	FALSE
220	2.63258e-12	4.23643e-09	0.691133	0.616883	0.0742495	TRUE	1.70334	3 vs 1	0.148499	3 vs 1	0.382265	0.233766	Pcdh7:ENSMUST00000068110.9, Pcdh7:ENSMUST00000199310.1, Pcdh7:ENSMUST00000191837.5	Pcdh7	NA	NA	FALSE	FALSE	4.23643e-09	NA	FALSE
221	4.49115e-18	9.3095e-16	0.938345	0.864336	0.0740098	FALSE	0.870794	1 vs 2	0.14802	1 vs 2	0.876691	0.728671	Kcnk10:ENSMUST00000221240.1, Kcnk10:ENSMUST00000221305.1	Kcnk10	2.25173e-17	4.56669e-15	FALSE	FALSE	9.3095e-16	4.60443e-15	FALSE
222	1	0.719653	0.906977	0.833333	0.0736434	TRUE	0.667829	2 vs 1	0.147287	2 vs 1	0.813953	0.666667	Igf1:ENSMUST00000062862.12, Igf1:ENSMUST00000105300.8	Igf1	NA	NA	FALSE	FALSE	1	NA	FALSE
223	0.0497309	0.0259468	0.810222	0.736842	0.0733803	TRUE	0.421837	1 vs 2	0.146761	1 vs 2	0.620445	0.473684	Atp8a1:ENSMUST00000135930.7, Atp8a1:ENSMUST00000113651.7	Atp8a1	NA	NA	FALSE	FALSE	0.0497309	NA	FALSE
224	0.615241	NA	0.714286	0.641026	0.0732601	TRUE	0.336472	2 vs 1	0.14652	2 vs 1	0.428571	0.282051	Il17rd:ENSMUST00000223942.1, Il17rd:ENSMUST00000035336.4	Il17rd	NA	NA	FALSE	FALSE	0.615241	NA	FALSE
225	0.675769	NA	0.507143	0.434783	0.0723602	TRUE	0.290938	2 vs 1	0.14472	2 vs 1	0.0142857	-0.130435	Ccdc171:ENSMUST00000126429.7, Ccdc171:ENSMUST00000053414.12	Ccdc171	NA	NA	FALSE	FALSE	0.675769	NA	FALSE
226	0.0106897	0.00353734	0.507576	0.435323	0.0722524	TRUE	0.290469	1 vs 2	0.144505	1 vs 2	0.0151515	-0.129353	D5Ertd579e:ENSMUST00000031091.12, D5Ertd579e:ENSMUST00000140653.1	D5Ertd579e	NA	NA	FALSE	FALSE	0.0106897	NA	FALSE
227	0.0721468	0.17611	0.631229	0.559091	0.0721383	TRUE	0.30002	2 vs 1	0.144277	2 vs 1	0.262458	0.118182	Fam71e1:ENSMUST00000205422.1, Fam71e1:ENSMUST00000205359.1	Fam71e1	NA	NA	FALSE	FALSE	0.17611	NA	FALSE
228	5.18848e-06	1.15331e-06	0.876159	0.804046	0.0721134	TRUE	0.544775	2 vs 1	0.144227	2 vs 1	0.752318	0.608091	Cstf2:ENSMUST00000113286.7, Cstf2:ENSMUST00000033609.8	Cstf2	NA	NA	FALSE	FALSE	5.18848e-06	NA	FALSE
229	0.0142673	0.0188742	0.286408	0.214511	0.0718967	TRUE	0.38505	1 vs 2	0.143793	1 vs 2	-0.427184	-0.570978	Zfp934:ENSMUST00000222429.1, Zfp934:ENSMUST00000222746.1	Zfp934	NA	NA	FALSE	FALSE	0.0188742	NA	FALSE
230	0.81073	NA	0.794118	0.722222	0.0718954	TRUE	0.394415	1 vs 2	0.143791	1 vs 2	0.588235	0.444444	Zbbx:ENSMUST00000107778.8, Zbbx:ENSMUST00000107775.7	Zbbx	NA	NA	FALSE	FALSE	0.81073	NA	FALSE
231	0.795483	NA	0.857143	0.785714	0.0714286	TRUE	0.492476	1 vs 2	0.142857	1 vs 2	0.714286	0.571429	Pyroxd2:ENSMUST00000236659.1, Pyroxd2:ENSMUST00000237747.1	Pyroxd2	NA	NA	FALSE	FALSE	0.795483	NA	FALSE
232	4.28398e-08	1.06069e-05	0.931567	0.86014	0.0714266	TRUE	0.794553	2 vs 1	0.142853	2 vs 1	0.863133	0.72028	Myt1l:ENSMUST00000218198.1, Myt1l:ENSMUST00000049784.16	Myt1l	NA	NA	FALSE	FALSE	1.06069e-05	NA	FALSE
233	0.473585	NA	0.945946	0.875	0.0709459	TRUE	0.916291	2 vs 1	0.141892	2 vs 1	0.891892	0.75	Med12l:ENSMUST00000040846.14, Med12l:ENSMUST00000199659.4	Med12l	NA	NA	FALSE	FALSE	0.473585	NA	FALSE
234	0.013011	NA	0.844985	0.774074	0.0709107	TRUE	0.464335	1 vs 2	0.141821	1 vs 2	0.68997	0.548148	Arid3b:ENSMUST00000171444.7, Arid3b:ENSMUST00000098686.3	Arid3b	NA	NA	FALSE	FALSE	0.013011	NA	FALSE
235	0.131329	NA	0.0978261	0.027027	0.0707991	TRUE	1.3619	1 vs 2	0.141598	1 vs 2	-0.804348	-0.945946	Sugct:ENSMUST00000068545.5, Sugct:ENSMUST00000220514.1	Sugct	NA	NA	FALSE	FALSE	0.131329	NA	FALSE
236	5.08978e-08	1.18966e-05	0.225174	0.154762	0.070412	FALSE	0.461965	2 vs 1	0.140824	2 vs 1	-0.549652	-0.690476	Ppp2r5c:ENSMUST00000221715.1, Ppp2r5c:ENSMUST00000221074.1	Ppp2r5c	1.49029e-07	3.19886e-05	FALSE	FALSE	1.18966e-05	3.32378e-05	FALSE
237	4.47151e-23	5.7167e-22	0.191126	0.121044	0.070082	FALSE	0.539869	2 vs 1	0.140164	2 vs 1	-0.617747	-0.757911	Pnkd:ENSMUST00000113805.7, Pnkd:ENSMUST00000087226.10	Pnkd	2.55714e-22	3.51723e-21	FALSE	FALSE	5.7167e-22	3.54629e-21	FALSE
238	9.73099e-19	1.68577e-18	0.946012	0.87672	0.0692919	FALSE	0.901759	2 vs 1	0.138584	2 vs 1	0.892023	0.753439	Homer3:ENSMUST00000087467.11, Homer3:ENSMUST00000140212.7	Homer3	5.01626e-18	8.86863e-18	FALSE	FALSE	1.68577e-18	9.07343e-18	FALSE
239	0.169395	0.296591	0.608541	0.540107	0.068434	TRUE	0.28041	2 vs 1	0.136868	2 vs 1	0.217082	0.0802139	Ints6l:ENSMUST00000101553.8, Ints6l:ENSMUST00000039374.8	Ints6l	NA	NA	FALSE	FALSE	0.296591	NA	FALSE
240	0.0557841	0.0194486	0.798544	0.730337	0.0682066	TRUE	0.380884	1 vs 2	0.136413	1 vs 2	0.597087	0.460674	Nsun6:ENSMUST00000028034.14, Nsun6:ENSMUST00000114713.1	Nsun6	NA	NA	FALSE	FALSE	0.0557841	NA	FALSE
241	0.900437	NA	0.795181	0.727273	0.067908	TRUE	0.375612	1 vs 2	0.135816	1 vs 2	0.590361	0.454545	Myo1d:ENSMUST00000041065.13, Myo1d:ENSMUST00000070997.5	Myo1d	NA	NA	FALSE	FALSE	0.900437	NA	FALSE
242	0.0470428	NA	0.828502	0.760684	0.0678187	TRUE	0.418619	2 vs 1	0.135637	2 vs 1	0.657005	0.521368	BC024978:ENSMUST00000179391.7, BC024978:ENSMUST00000108379.7	BC024978	NA	NA	FALSE	FALSE	0.0470428	NA	FALSE
243	0.18169	NA	0.0854701	0.0196078	0.0658622	TRUE	1.54178	2 vs 1	0.131724	2 vs 1	-0.82906	-0.960784	Larp1b:ENSMUST00000191805.6, Larp1b:ENSMUST00000026862.8	Larp1b	NA	NA	FALSE	FALSE	0.18169	NA	FALSE
244	0.000100588	0.000440822	0.46392	0.412362	0.0515587	TRUE	0.641026	1 vs 3	0.131584	1 vs 2	-0.372106	-0.50369	Cdadc1:ENSMUST00000167100.8, Cdadc1:ENSMUST00000056997.14, Cdadc1:ENSMUST00000171683.2	Cdadc1	NA	NA	FALSE	FALSE	0.000440822	NA	FALSE
245	0.000365126	0.000463561	0.125781	0.0601504	0.0656309	TRUE	0.810086	1 vs 2	0.131262	1 vs 2	-0.748437	-0.879699	Ppcdc:ENSMUST00000214144.1, Ppcdc:ENSMUST00000085709.5	Ppcdc	NA	NA	FALSE	FALSE	0.000463561	NA	FALSE
246	1.15872e-11	3.4427e-09	0.936233	0.870614	0.0656185	FALSE	0.780222	1 vs 2	0.131237	1 vs 2	0.872465	0.741228	Ptk2:ENSMUST00000226988.2, Ptk2:ENSMUST00000228180.2	Ptk2	4.32745e-11	1.1158e-08	FALSE	FALSE	3.4427e-09	1.14548e-08	FALSE
247	0.00212468	0.00176736	0.91119	0.845794	0.0653957	TRUE	0.626263	2 vs 1	0.130791	2 vs 1	0.82238	0.691589	Sass6:ENSMUST00000198386.4, Sass6:ENSMUST00000197335.1	Sass6	NA	NA	FALSE	FALSE	0.00212468	NA	FALSE
248	3.69293e-05	8.94506e-05	0.376336	0.343277	0.0330584	FALSE	0.51187	4 vs 1	0.130462	2 vs 1	0.533835	0.403372	Nsd3:ENSMUST00000143445.1, Nsd3:ENSMUST00000136107.8, Nsd3:ENSMUST00000146919.7, Nsd3:ENSMUST00000142395.7	Nsd3	9.19464e-05	0.000223935	FALSE	FALSE	8.94506e-05	0.000232191	FALSE
249	0.00555514	NA	0.993671	0.928571	0.0650995	TRUE	2.4913	2 vs 1	0.130199	2 vs 1	0.987342	0.857143	Cntrl:ENSMUST00000113033.5, Cntrl:ENSMUST00000028237.14	Cntrl	NA	NA	FALSE	FALSE	0.00555514	NA	FALSE
250	0.767697	NA	0.682927	0.619048	0.0638792	TRUE	0.281747	1 vs 2	0.127758	1 vs 2	0.365854	0.238095	Slc16a10:ENSMUST00000092566.7, Slc16a10:ENSMUST00000213488.1	Slc16a10	NA	NA	FALSE	FALSE	0.767697	NA	FALSE
251	0.392168	NA	0.695312	0.631579	0.0637336	TRUE	0.286078	2 vs 1	0.127467	2 vs 1	0.390625	0.263158	Vwa8:ENSMUST00000227255.1, Vwa8:ENSMUST00000040990.6	Vwa8	NA	NA	FALSE	FALSE	0.392168	NA	FALSE
252	8.32415e-05	6.10397e-14	0.432873	0.3692	0.0636728	FALSE	0.265511	2 vs 1	0.127346	2 vs 1	-0.134254	-0.261599	Macrod2:ENSMUST00000110062.7, Macrod2:ENSMUST00000110064.7	Macrod2	0.000201764	2.63779e-13	FALSE	FALSE	8.32415e-05	0.000217617	FALSE
253	0.0876347	0.0804634	0.345169	0.307252	0.0379174	TRUE	0.734871	3 vs 1	0.126566	2 vs 1	0.321222	0.194656	B230307C23Rik:ENSMUST00000231913.1, B230307C23Rik:ENSMUST00000232387.1, B230307C23Rik:ENSMUST00000231936.1	B230307C23Rik	NA	NA	FALSE	FALSE	0.0876347	NA	FALSE
254	0.00531901	0.0104854	0.711044	0.648485	0.062559	TRUE	0.288073	1 vs 2	0.125118	1 vs 2	0.422088	0.29697	Cep97:ENSMUST00000023270.13, Cep97:ENSMUST00000122280.7	Cep97	NA	NA	FALSE	FALSE	0.0104854	NA	FALSE
255	0.000557327	0.00380079	0.886333	0.82438	0.0619527	TRUE	0.507508	1 vs 2	0.123905	1 vs 2	0.772666	0.64876	Rhobtb3:ENSMUST00000022078.11, Rhobtb3:ENSMUST00000109606.2	Rhobtb3	NA	NA	FALSE	FALSE	0.00380079	NA	FALSE
256	0.666447	NA	0.918919	0.857143	0.0617761	TRUE	0.635989	1 vs 2	0.123552	1 vs 2	0.837838	0.714286	Tph1:ENSMUST00000049298.14, Tph1:ENSMUST00000168335.2	Tph1	NA	NA	FALSE	FALSE	0.666447	NA	FALSE
257	0.610387	0.774651	0.71875	0.657224	0.0615262	TRUE	0.287323	1 vs 2	0.123052	1 vs 2	0.4375	0.314448	Prrx1:ENSMUST00000075805.12, Prrx1:ENSMUST00000174397.2	Prrx1	NA	NA	FALSE	FALSE	0.774651	NA	FALSE
258	0.0033159	0.0211058	0.562088	0.500736	0.0613519	TRUE	0.246696	1 vs 2	0.122704	1 vs 2	0.124177	0.00147275	Sbf2:ENSMUST00000164759.7, Sbf2:ENSMUST00000171218.7	Sbf2	NA	NA	FALSE	FALSE	0.0211058	NA	FALSE
259	0.00323605	6.72917e-05	0.784907	0.723982	0.0609254	TRUE	0.330197	1 vs 2	0.121851	1 vs 2	0.569815	0.447964	Tenm3:ENSMUST00000033965.13, Tenm3:ENSMUST00000110346.8	Tenm3	NA	NA	FALSE	FALSE	0.00323605	NA	FALSE
260	0.888697	NA	0.0606061	0	0.0606061	TRUE	Inf	1 vs 2	0.121212	1 vs 2	-0.878788	-1	Sptb:ENSMUST00000021458.12, Sptb:ENSMUST00000166101.1	Sptb	NA	NA	FALSE	FALSE	0.888697	NA	FALSE
261	3.11729e-28	1.80766e-22	0.979708	0.920319	0.0593891	FALSE	1.43033	2 vs 1	0.118778	2 vs 1	0.959416	0.840637	Gorasp2:ENSMUST00000112205.1, Gorasp2:ENSMUST00000028509.10	Gorasp2	2.11283e-27	1.17175e-21	FALSE	FALSE	1.80766e-22	1.18143e-21	FALSE
262	0.00199266	NA	0.956885	0.922414	0.0344708	TRUE	0.919881	1 vs 2	0.118436	1 vs 2	0.894298	0.775862	Agtpbp1:ENSMUST00000164215.7, Agtpbp1:ENSMUST00000109830.8, Agtpbp1:ENSMUST00000167096.7	Agtpbp1	NA	NA	FALSE	FALSE	0.00199266	NA	FALSE
263	1	NA	0.558511	0.5	0.0585106	TRUE	0.23512	1 vs 2	0.117021	1 vs 2	0.117021	0	Ano4:ENSMUST00000182341.7, Ano4:ENSMUST00000181976.7	Ano4	NA	NA	FALSE	FALSE	1	NA	FALSE
264	0.000355154	0.0164185	0.699549	0.641691	0.0578588	FALSE	0.262444	2 vs 1	0.115718	2 vs 1	0.399099	0.283381	Pik3ip1:ENSMUST00000093399.10, Pik3ip1:ENSMUST00000045153.10	Pik3ip1	0.000782524	0.0289316	FALSE	FALSE	0.0164185	0.0311356	FALSE
265	0.0101936	0.0194755	0.386157	0.32838	0.0577763	TRUE	0.252023	1 vs 2	0.115553	1 vs 2	-0.227687	-0.343239	Gm29394:ENSMUST00000176935.7, Gm29394:ENSMUST00000177504.8	Gm29394	NA	NA	FALSE	FALSE	0.0194755	NA	FALSE
266	0.00570424	NA	0.977492	0.92	0.057492	TRUE	1.32877	1 vs 2	0.114984	1 vs 2	0.954984	0.84	Atp8a2:ENSMUST00000080368.12, Atp8a2:ENSMUST00000131670.2	Atp8a2	NA	NA	FALSE	FALSE	0.00570424	NA	FALSE
267	0.000364941	0.00183471	0.718217	0.660962	0.0572554	FALSE	0.268052	2 vs 1	0.114511	2 vs 1	0.436434	0.321923	Nrf1:ENSMUST00000115204.7, Nrf1:ENSMUST00000115208.7	Nrf1	0.00079505	0.00380572	FALSE	FALSE	0.00183471	0.00402099	FALSE
268	0.0360168	NA	0.107692	0.0508475	0.0568449	TRUE	0.812207	2 vs 1	0.11369	2 vs 1	-0.784615	-0.898305	Zfp229:ENSMUST00000182603.1, Zfp229:ENSMUST00000183192.7	Zfp229	NA	NA	FALSE	FALSE	0.0360168	NA	FALSE
269	1.29929e-63	2.51402e-44	0.990047	0.933553	0.056494	FALSE	1.95731	1 vs 2	0.112988	1 vs 2	0.980095	0.867107	Kif1b:ENSMUST00000238956.1, Kif1b:ENSMUST00000030806.5	Kif1b	1.534e-62	2.17283e-43	FALSE	FALSE	2.51402e-44	2.30033e-43	FALSE
270	0.401199	NA	0.727273	0.671053	0.0562201	TRUE	0.267879	2 vs 1	0.11244	2 vs 1	0.454545	0.342105	Zfp709:ENSMUST00000188374.6, Zfp709:ENSMUST00000188685.6	Zfp709	NA	NA	FALSE	FALSE	0.401199	NA	FALSE
271	1.27515e-10	5.90853e-11	0.386452	0.330549	0.0559032	FALSE	0.243453	2 vs 1	0.111806	2 vs 1	-0.227095	-0.338902	Luc7l2:ENSMUST00000161538.7, Luc7l2:ENSMUST00000057692.10	Luc7l2	4.53112e-10	2.08233e-10	FALSE	FALSE	1.27515e-10	4.65771e-10	FALSE
272	0.00738315	0.000567717	0.354374	0.314937	0.0394362	TRUE	0.68566	3 vs 1	0.111478	3 vs 1	-0.336645	-0.448124	Pcdh10:ENSMUST00000193252.1, Pcdh10:ENSMUST00000171554.7, Pcdh10:ENSMUST00000170695.3, Pcdh10:ENSMUST00000166126.6	Pcdh10	NA	NA	FALSE	FALSE	0.00738315	NA	FALSE
273	0.00512638	0.0173635	0.134091	0.0786517	0.0554392	TRUE	0.595547	1 vs 2	0.110878	1 vs 2	-0.731818	-0.842697	Atp23:ENSMUST00000026504.12, Atp23:ENSMUST00000168520.2	Atp23	NA	NA	FALSE	FALSE	0.0173635	NA	FALSE
274	1.91153e-27	2.67827e-22	0.849679	0.794395	0.0552838	FALSE	0.380461	2 vs 1	0.110568	2 vs 1	0.699358	0.588791	Vps29:ENSMUST00000117868.7, Vps29:ENSMUST00000155671.7	Vps29	1.27203e-26	1.67623e-21	FALSE	FALSE	2.67827e-22	1.69008e-21	FALSE
275	0.0172894	0.00900898	0.269276	0.214433	0.0548427	TRUE	0.300108	2 vs 1	0.109685	2 vs 1	-0.461449	-0.571134	Zxdc:ENSMUST00000045740.7, Zxdc:ENSMUST00000075117.9	Zxdc	NA	NA	FALSE	FALSE	0.0172894	NA	FALSE
276	0.0222388	0.00673219	0.630199	0.575492	0.0547063	TRUE	0.228773	2 vs 1	0.109413	2 vs 1	0.260397	0.150985	Ptprz1:ENSMUST00000202579.3, Ptprz1:ENSMUST00000090568.6	Ptprz1	NA	NA	FALSE	FALSE	0.0222388	NA	FALSE
277	8.30654e-17	2.88545e-14	0.652782	0.598111	0.0546705	FALSE	0.233688	2 vs 1	0.109341	2 vs 1	0.305563	0.196222	Nop56:ENSMUST00000136621.8, Nop56:ENSMUST00000103198.10	Nop56	4.00026e-16	1.29311e-13	FALSE	FALSE	2.88545e-14	1.30379e-13	FALSE
278	9.45194e-07	2.16246e-05	0.825839	0.772198	0.0536405	FALSE	0.335653	1 vs 2	0.107281	1 vs 2	0.651678	0.544397	Ndel1:ENSMUST00000018880.13, Ndel1:ENSMUST00000101017.8	Ndel1	2.66109e-06	5.60694e-05	FALSE	FALSE	2.16246e-05	5.81956e-05	FALSE
279	5.081e-08	7.59887e-07	0.616464	0.563264	0.0531999	FALSE	0.220147	1 vs 2	0.1064	1 vs 2	0.232928	0.126528	Ppil2:ENSMUST00000023455.13, Ppil2:ENSMUST00000231712.1	Ppil2	1.49029e-07	2.21749e-06	FALSE	FALSE	7.59887e-07	2.27217e-06	FALSE
280	0.00278416	0.00567748	0.935237	0.882143	0.0530939	TRUE	0.657181	2 vs 1	0.106188	2 vs 1	0.870474	0.764286	Spred1:ENSMUST00000110901.1, Spred1:ENSMUST00000028829.12	Spred1	NA	NA	FALSE	FALSE	0.00567748	NA	FALSE
281	0.0032939	0.0292557	0.544562	0.491473	0.0530887	TRUE	1.69025	2 vs 1	0.106177	3 vs 1	0.0891231	-0.0170543	Senp7:ENSMUST00000049128.10, Senp7:ENSMUST00000202000.1, Senp7:ENSMUST00000089362.8	Senp7	NA	NA	FALSE	FALSE	0.0292557	NA	FALSE
282	0.085091	NA	0.808939	0.756198	0.0527402	TRUE	0.311179	1 vs 2	0.10548	1 vs 2	0.617877	0.512397	Ttc17:ENSMUST00000055081.13, Ttc17:ENSMUST00000094801.4	Ttc17	NA	NA	FALSE	FALSE	0.085091	NA	FALSE
283	0.0442735	NA	0.8086	0.768072	0.040528	TRUE	0.875239	3 vs 2	0.104878	3 vs 2	0.755481	0.650602	Wdcp:ENSMUST00000053034.5, Wdcp:ENSMUST00000220215.1, Wdcp:ENSMUST00000223551.1	Wdcp	NA	NA	FALSE	FALSE	0.0442735	NA	FALSE
284	0.00569854	0.0179471	0.459121	0.407178	0.0519432	FALSE	0.211763	2 vs 1	0.103886	2 vs 1	-0.0817573	-0.185644	Add2:ENSMUST00000203366.2, Add2:ENSMUST00000204059.2	Add2	0.0108066	0.0310323	FALSE	FALSE	0.0179471	0.0333535	FALSE
285	0.00038653	0.00600163	0.510185	0.490741	0.0194444	TRUE	0.862818	2 vs 1	0.103704	2 vs 1	0.862963	0.759259	Zfp961:ENSMUST00000136516.8, Zfp961:ENSMUST00000131237.7, Zfp961:ENSMUST00000132848.1	Zfp961	NA	NA	FALSE	FALSE	0.00600163	NA	FALSE
286	0.0310541	NA	0.921693	0.871166	0.0505271	TRUE	0.554267	2 vs 1	0.101054	2 vs 1	0.843386	0.742331	Anks1b:ENSMUST00000182083.1, Anks1b:ENSMUST00000182356.7	Anks1b	NA	NA	FALSE	FALSE	0.0310541	NA	FALSE
287	2.51565e-05	0.000678601	0.897225	0.846743	0.0504822	FALSE	0.457486	2 vs 1	0.100964	2 vs 1	0.794451	0.693487	Zmym2:ENSMUST00000223669.1, Zmym2:ENSMUST00000022511.9	Zmym2	6.30637e-05	0.00151124	FALSE	FALSE	0.000678601	0.00160237	FALSE
288	1	NA	0.9	0.85	0.05	TRUE	0.462624	1 vs 2	0.1	1 vs 2	0.8	0.7	Dtx3l:ENSMUST00000081933.13, Dtx3l:ENSMUST00000114885.2	Dtx3l	NA	NA	FALSE	FALSE	1	NA	FALSE
289	0.0501649	0.182565	0.325472	0.275794	0.049678	TRUE	0.849577	1 vs 3	0.0993561	1 vs 3	-0.349057	-0.448413	Gm14391:ENSMUST00000099028.9, Gm14391:ENSMUST00000165892.7, Gm14391:ENSMUST00000109055.1	Gm14391	NA	NA	FALSE	FALSE	0.182565	NA	FALSE
290	0.054378	0.135907	0.858108	0.808451	0.0496574	TRUE	0.35969	2 vs 1	0.0993148	2 vs 1	0.716216	0.616901	Nup155:ENSMUST00000230017.1, Nup155:ENSMUST00000163765.2	Nup155	NA	NA	FALSE	FALSE	0.135907	NA	FALSE
291	0.236818	NA	0.920502	0.870968	0.0495344	TRUE	0.539646	2 vs 1	0.0990687	2 vs 1	0.841004	0.741935	Skap1:ENSMUST00000100519.10, Skap1:ENSMUST00000103154.10	Skap1	NA	NA	FALSE	FALSE	0.236818	NA	FALSE
292	0.521029	NA	0.23913	0.189655	0.0494753	TRUE	0.2948	2 vs 1	0.0989505	2 vs 1	-0.521739	-0.62069	Ece2:ENSMUST00000003898.11, Ece2:ENSMUST00000122306.7	Ece2	NA	NA	FALSE	FALSE	0.521029	NA	FALSE
293	0.107761	0.262387	0.520961	0.47181	0.0491511	TRUE	0.196773	1 vs 2	0.0983021	1 vs 2	0.0419223	-0.0563798	Slco5a1:ENSMUST00000188454.6, Slco5a1:ENSMUST00000136197.7	Slco5a1	NA	NA	FALSE	FALSE	0.262387	NA	FALSE
294	0.593658	0.208133	0.766102	0.717391	0.0487104	TRUE	0.25487	2 vs 1	0.0974208	2 vs 1	0.532203	0.434783	Neurl1a:ENSMUST00000235326.1, Neurl1a:ENSMUST00000111808.10	Neurl1a	NA	NA	FALSE	FALSE	0.593658	NA	FALSE
295	0.00431465	0.0159593	0.941509	0.892857	0.0486523	TRUE	0.658355	1 vs 2	0.0973046	1 vs 2	0.883019	0.785714	Glrb:ENSMUST00000029654.14, Glrb:ENSMUST00000107743.7	Glrb	NA	NA	FALSE	FALSE	0.0159593	NA	FALSE
296	0.584075	NA	0.398467	0.35	0.0484674	TRUE	0.207184	2 vs 1	0.0969349	2 vs 1	-0.203065	-0.3	Ttll3:ENSMUST00000204026.2, Ttll3:ENSMUST00000032414.10	Ttll3	NA	NA	FALSE	FALSE	0.584075	NA	FALSE
297	0.0428477	0.103133	0.896673	0.848297	0.0483753	TRUE	0.439479	1 vs 2	0.0967506	1 vs 2	0.793345	0.696594	Mmab:ENSMUST00000031560.13, Mmab:ENSMUST00000123256.2	Mmab	NA	NA	FALSE	FALSE	0.103133	NA	FALSE
298	0.00696461	0.0339223	0.866904	0.818584	0.0483201	TRUE	0.367075	1 vs 2	0.0966401	1 vs 2	0.733808	0.637168	Lcorl:ENSMUST00000238522.1, Lcorl:ENSMUST00000087164.9	Lcorl	NA	NA	FALSE	FALSE	0.0339223	NA	FALSE
299	0.107345	0.273185	0.599792	0.551559	0.0482333	TRUE	0.197628	2 vs 1	0.0964667	2 vs 1	0.199584	0.103118	Xrn1:ENSMUST00000190665.1, Xrn1:ENSMUST00000185633.6	Xrn1	NA	NA	FALSE	FALSE	0.273185	NA	FALSE
300	0.0605523	0.390405	0.639889	0.591912	0.0479774	TRUE	0.203009	2 vs 1	0.0959549	2 vs 1	0.279778	0.183824	E130308A19Rik:ENSMUST00000052420.6, E130308A19Rik:ENSMUST00000070150.10	E130308A19Rik	NA	NA	FALSE	FALSE	0.390405	NA	FALSE
301	0.595217	0.0421456	0.492188	0.444444	0.0477431	TRUE	0.191891	2 vs 1	0.0954861	2 vs 1	-0.015625	-0.111111	Aifm2:ENSMUST00000099706.8, Aifm2:ENSMUST00000067857.10	Aifm2	NA	NA	FALSE	FALSE	0.595217	NA	FALSE
302	7.18263e-06	0.000189339	0.795049	0.747355	0.047694	FALSE	0.271078	2 vs 1	0.095388	2 vs 1	0.590098	0.49471	Patz1:ENSMUST00000094471.9, Patz1:ENSMUST00000134089.7	Patz1	1.90496e-05	0.000452171	FALSE	FALSE	0.000189339	0.000465087	FALSE
303	1.40399e-06	0.000172117	0.90843	0.866758	0.0416716	FALSE	1.04672	1 vs 3	0.0949302	1 vs 2	0.677348	0.582418	Srcin1:ENSMUST00000238233.1, Srcin1:ENSMUST00000107590.8, Srcin1:ENSMUST00000238342.1	Srcin1	3.9226e-06	0.000413765	FALSE	FALSE	0.000172117	0.000425641	FALSE
304	0.480738	NA	0.748408	0.72807	0.0203375	TRUE	0.444441	1 vs 2	0.0947592	1 vs 2	0.585987	0.491228	Mpp7:ENSMUST00000115869.3, Mpp7:ENSMUST00000234571.1, Mpp7:ENSMUST00000235093.1	Mpp7	NA	NA	FALSE	FALSE	0.480738	NA	FALSE
305	0.00311283	0.011144	0.917165	0.87013	0.0470349	TRUE	0.502327	2 vs 1	0.0940699	2 vs 1	0.83433	0.74026	Rfx7:ENSMUST00000184015.1, Rfx7:ENSMUST00000093820.9	Rfx7	NA	NA	FALSE	FALSE	0.011144	NA	FALSE
306	0.637197	NA	0.661034	0.622881	0.0381531	TRUE	0.64913	4 vs 5	0.0925541	1 vs 5	0.38069	0.288136	Ccdc30:ENSMUST00000238759.1, Ccdc30:ENSMUST00000143494.2, Ccdc30:ENSMUST00000084307.4, Ccdc30:ENSMUST00000238422.1, Ccdc30:ENSMUST00000238287.1	Ccdc30	NA	NA	FALSE	FALSE	0.637197	NA	FALSE
307	0.165908	0.0278307	0.232848	0.18705	0.0457979	TRUE	0.276994	2 vs 1	0.0915957	2 vs 1	-0.534304	-0.625899	Cdh7:ENSMUST00000146282.2, Cdh7:ENSMUST00000112701.7	Cdh7	NA	NA	FALSE	FALSE	0.165908	NA	FALSE
308	2.16692e-20	3.32433e-19	0.958068	0.912591	0.0454766	FALSE	0.783171	2 vs 1	0.0909533	2 vs 1	0.916135	0.825182	Seh1l:ENSMUST00000237700.1, Seh1l:ENSMUST00000025421.8	Seh1l	1.14941e-19	1.85651e-18	FALSE	FALSE	3.32433e-19	1.87186e-18	FALSE
309	0.00686315	0.00316188	0.843961	0.798493	0.0454675	TRUE	0.311095	1 vs 2	0.090935	1 vs 2	0.687922	0.596987	Xpr1:ENSMUST00000027741.11, Xpr1:ENSMUST00000111774.1	Xpr1	NA	NA	FALSE	FALSE	0.00686315	NA	FALSE
310	1	NA	0.954545	0.909091	0.0454545	TRUE	0.741937	2 vs 1	0.0909091	2 vs 1	0.909091	0.818182	Casz1:ENSMUST00000094464.9, Casz1:ENSMUST00000122222.7	Casz1	NA	NA	FALSE	FALSE	1	NA	FALSE
311	0.23723	0.353974	0.727612	0.682353	0.045259	TRUE	0.217934	1 vs 2	0.090518	1 vs 2	0.455224	0.364706	Tm7sf2:ENSMUST00000113543.8, Tm7sf2:ENSMUST00000161528.1	Tm7sf2	NA	NA	FALSE	FALSE	0.353974	NA	FALSE
312	1	0.611465	0.844444	0.8	0.0444444	TRUE	0.305382	2 vs 1	0.0888889	2 vs 1	0.688889	0.6	Pf4:ENSMUST00000202625.1, Pf4:ENSMUST00000031320.7	Pf4	NA	NA	FALSE	FALSE	1	NA	FALSE
313	0.0814402	0.168823	0.937089	0.89313	0.0439587	TRUE	0.577932	2 vs 1	0.0879175	2 vs 1	0.874177	0.78626	Herc3:ENSMUST00000031823.11, Herc3:ENSMUST00000041401.10	Herc3	NA	NA	FALSE	FALSE	0.168823	NA	FALSE
314	0.0456118	NA	0.951049	0.907143	0.0439061	TRUE	0.687507	2 vs 1	0.0878122	2 vs 1	0.902098	0.814286	Btbd8:ENSMUST00000162298.3, Btbd8:ENSMUST00000100951.8	Btbd8	NA	NA	FALSE	FALSE	0.0456118	NA	FALSE
315	0.00874142	0.0461723	0.719246	0.675626	0.0436208	FALSE	0.206986	2 vs 1	0.0872416	2 vs 1	0.438493	0.351251	Zfp655:ENSMUST00000196069.4, Zfp655:ENSMUST00000199322.4	Zfp655	0.0160772	0.0725564	FALSE	FALSE	0.0461723	0.0764663	FALSE
316	0.00186505	0.00189788	0.968376	0.924812	0.043564	TRUE	0.912107	1 vs 2	0.0871281	1 vs 2	0.936752	0.849624	Tnfrsf19:ENSMUST00000111236.3, Tnfrsf19:ENSMUST00000224371.1	Tnfrsf19	NA	NA	FALSE	FALSE	0.00189788	NA	FALSE
317	4.31088e-15	1.0539e-12	0.949651	0.906213	0.0434375	FALSE	0.668862	2 vs 1	0.0868751	2 vs 1	0.899302	0.812427	Hbs1l:ENSMUST00000061324.5, Hbs1l:ENSMUST00000020153.9	Hbs1l	1.83463e-14	4.11361e-12	FALSE	FALSE	1.0539e-12	4.23877e-12	FALSE
318	4.16877e-63	4.10628e-61	0.738707	0.695658	0.043049	FALSE	0.212553	2 vs 1	0.0860981	2 vs 1	0.477414	0.391316	Rbx1:ENSMUST00000230219.1, Rbx1:ENSMUST00000023036.6	Rbx1	4.76803e-62	5.13993e-60	FALSE	FALSE	4.10628e-61	5.18241e-60	FALSE
319	0.863199	NA	0.669591	0.64	0.0295906	TRUE	0.454255	1 vs 3	0.0860819	1 vs 2	-0.233918	-0.32	Fsip1:ENSMUST00000231133.1, Fsip1:ENSMUST00000028821.9, Fsip1:ENSMUST00000028820.6	Fsip1	NA	NA	FALSE	FALSE	0.863199	NA	FALSE
320	0.249344	0.0204042	0.42204	0.380074	0.0419661	TRUE	0.17483	2 vs 1	0.0839321	2 vs 1	-0.15592	-0.239852	2210408I21Rik:ENSMUST00000225605.1, 2210408I21Rik:ENSMUST00000168779.2	2210408I21Rik	NA	NA	FALSE	FALSE	0.249344	NA	FALSE
321	1.44208e-12	4.01077e-11	0.484722	0.442837	0.0418848	FALSE	0.168524	2 vs 1	0.0837697	2 vs 1	-0.0305557	-0.114325	Bcl11a:ENSMUST00000109514.7, Bcl11a:ENSMUST00000109516.7	Bcl11a	5.44124e-12	1.47062e-10	FALSE	FALSE	4.01077e-11	1.5452e-10	FALSE
322	0.969915	NA	0.0416667	0	0.0416667	TRUE	Inf	2 vs 1	0.0833333	2 vs 1	-0.916667	-1	Milr1:ENSMUST00000106794.8, Milr1:ENSMUST00000147326.8	Milr1	NA	NA	FALSE	FALSE	0.969915	NA	FALSE
323	2.14817e-05	0.000109149	0.937092	0.895644	0.0414472	FALSE	0.551362	1 vs 2	0.0828944	1 vs 2	0.874183	0.791289	Kcmf1:ENSMUST00000068697.10, Kcmf1:ENSMUST00000206378.1	Kcmf1	5.42227e-05	0.000267711	FALSE	FALSE	0.000109149	0.000275508	FALSE
324	0.00615327	NA	0.959244	0.918605	0.0406393	TRUE	0.735003	1 vs 2	0.0812786	1 vs 2	0.918488	0.837209	Arhgap39:ENSMUST00000036176.15, Arhgap39:ENSMUST00000176219.8	Arhgap39	NA	NA	FALSE	FALSE	0.00615327	NA	FALSE
325	0.00592125	0.00888067	0.693305	0.652817	0.0404876	FALSE	0.18417	1 vs 2	0.0809753	1 vs 2	0.386609	0.305634	Vps51:ENSMUST00000025711.12, Vps51:ENSMUST00000160590.1	Vps51	0.011171	0.016703	FALSE	FALSE	0.00888067	0.0177613	FALSE
326	0.2685	NA	0.16092	0.120521	0.0403984	TRUE	0.336102	1 vs 2	0.0807967	1 vs 2	-0.678161	-0.758958	BC055324:ENSMUST00000097493.9, BC055324:ENSMUST00000045876.7	BC055324	NA	NA	FALSE	FALSE	0.2685	NA	FALSE
327	2.93475e-06	3.21546e-06	0.0731707	0.0331839	0.0399869	FALSE	0.832971	2 vs 1	0.0799738	2 vs 1	-0.853659	-0.933632	Clpb:ENSMUST00000001884.13, Clpb:ENSMUST00000209579.1	Clpb	8.13726e-06	9.11886e-06	FALSE	FALSE	3.21546e-06	9.41488e-06	FALSE
328	0.000115144	0.000136542	0.121343	0.0814963	0.0398462	FALSE	0.44241	1 vs 2	0.0796924	1 vs 2	-0.757315	-0.837007	Ccdc167:ENSMUST00000129091.8, Ccdc167:ENSMUST00000128751.2	Ccdc167	0.000271889	0.000330431	FALSE	FALSE	0.000136542	0.000339961	FALSE
329	0.0540421	0.188671	0.166767	0.127563	0.0392044	TRUE	0.313968	2 vs 1	0.0784087	2 vs 1	-0.666466	-0.744875	Gpr137c:ENSMUST00000227086.1, Gpr137c:ENSMUST00000146150.2	Gpr137c	NA	NA	FALSE	FALSE	0.188671	NA	FALSE
330	0.00590686	0.596505	0.770362	0.736967	0.0333952	TRUE	1.37188	2 vs 3	0.0779632	2 vs 3	0.404977	0.327014	Lats2:ENSMUST00000022531.13, Lats2:ENSMUST00000173990.7, Lats2:ENSMUST00000038381.13	Lats2	NA	NA	FALSE	FALSE	0.596505	NA	FALSE
331	0.0109475	0.00833054	0.818794	0.779932	0.0388625	FALSE	0.242931	2 vs 1	0.077725	2 vs 1	0.637588	0.559863	Zfp932:ENSMUST00000099484.8, Zfp932:ENSMUST00000112540.7	Zfp932	0.0197379	0.0157499	FALSE	FALSE	0.0109475	0.0214267	FALSE
332	0.674964	0.673094	0.958716	0.92	0.0387156	TRUE	0.702763	1 vs 2	0.0774312	1 vs 2	0.917431	0.84	Slc7a14:ENSMUST00000091259.8, Slc7a14:ENSMUST00000108245.1	Slc7a14	NA	NA	FALSE	FALSE	0.674964	NA	FALSE
333	0.00542828	NA	0.0453421	0.00732601	0.0380161	TRUE	1.86186	2 vs 1	0.0760322	2 vs 1	-0.909316	-0.985348	Esyt2:ENSMUST00000100986.3, Esyt2:ENSMUST00000220816.1	Esyt2	NA	NA	FALSE	FALSE	0.00542828	NA	FALSE
334	0.96139	NA	0.72549	0.6875	0.0379902	TRUE	0.183403	1 vs 2	0.0759804	1 vs 2	0.45098	0.375	Gria4:ENSMUST00000063508.14, Gria4:ENSMUST00000163309.1	Gria4	NA	NA	FALSE	FALSE	0.96139	NA	FALSE
335	0.0659916	0.201647	0.802405	0.764706	0.0376996	TRUE	0.222742	1 vs 2	0.0753992	1 vs 2	0.604811	0.529412	Hmbox1:ENSMUST00000022544.13, Hmbox1:ENSMUST00000067843.9	Hmbox1	NA	NA	FALSE	FALSE	0.201647	NA	FALSE
336	0.218329	NA	0.904286	0.866667	0.037619	TRUE	0.373976	2 vs 1	0.0752381	2 vs 1	0.808571	0.733333	Pkd1:ENSMUST00000228550.1, Pkd1:ENSMUST00000035565.4	Pkd1	NA	NA	FALSE	FALSE	0.218329	NA	FALSE
337	1.17204e-10	3.85494e-11	0.10735	0.0701873	0.0371631	FALSE	0.46572	2 vs 1	0.0743262	2 vs 1	-0.785299	-0.859625	Pbdc1:ENSMUST00000033577.10, Pbdc1:ENSMUST00000119477.1	Pbdc1	4.20554e-10	1.4279e-10	FALSE	FALSE	1.17204e-10	4.33298e-10	FALSE
338	0.0959199	NA	0.96281	0.925676	0.0371342	TRUE	0.731728	2 vs 1	0.0742685	2 vs 1	0.92562	0.851351	Ift140:ENSMUST00000142000.8, Ift140:ENSMUST00000024983.11	Ift140	NA	NA	FALSE	FALSE	0.0959199	NA	FALSE
339	0.000357053	0.00390808	0.864843	0.827765	0.0370784	FALSE	0.286244	2 vs 1	0.0741567	2 vs 1	0.729687	0.65553	Fbxo3:ENSMUST00000111135.7, Fbxo3:ENSMUST00000111136.7	Fbxo3	0.000782524	0.00783776	FALSE	FALSE	0.00390808	0.00803572	FALSE
340	0.740861	NA	0.808989	0.77193	0.0370589	TRUE	0.224212	1 vs 2	0.0741179	1 vs 2	0.617978	0.54386	Ccdc15:ENSMUST00000239439.1, Ccdc15:ENSMUST00000216042.1	Ccdc15	NA	NA	FALSE	FALSE	0.740861	NA	FALSE
341	0.0231786	0.0684862	0.661003	0.624483	0.0365197	FALSE	0.159146	2 vs 1	0.0730395	2 vs 1	0.322006	0.248966	Chfr:ENSMUST00000200038.1, Chfr:ENSMUST00000014812.12	Chfr	0.0398281	0.103258	FALSE	FALSE	0.0684862	0.109567	FALSE
342	7.36498e-05	0.000425756	0.888937	0.852632	0.0363054	FALSE	0.324537	2 vs 1	0.0726108	2 vs 1	0.777874	0.705263	Ints10:ENSMUST00000110241.7, Ints10:ENSMUST00000034328.12	Ints10	0.000179706	0.00098439	FALSE	FALSE	0.000425756	0.00101847	FALSE
343	0.440132	0.60718	0.571138	0.535354	0.0357847	TRUE	0.144846	2 vs 1	0.0715694	2 vs 1	0.142276	0.0707071	Mcph1:ENSMUST00000146819.7, Mcph1:ENSMUST00000039412.14	Mcph1	NA	NA	FALSE	FALSE	0.60718	NA	FALSE
344	0.389403	0.273934	0.636473	0.599327	0.0371468	TRUE	0.721318	2 vs 3	0.0711462	1 vs 3	0.434783	0.363636	Fkbp15:ENSMUST00000084527.9, Fkbp15:ENSMUST00000084528.9, Fkbp15:ENSMUST00000098033.9, Fkbp15:ENSMUST00000107461.1	Fkbp15	NA	NA	FALSE	FALSE	0.389403	NA	FALSE
345	0.669987	NA	0.887755	0.852941	0.0348139	TRUE	0.310155	2 vs 1	0.0696279	2 vs 1	0.77551	0.705882	Drc3:ENSMUST00000094140.8, Drc3:ENSMUST00000108723.8	Drc3	NA	NA	FALSE	FALSE	0.669987	NA	FALSE
346	0.0542583	0.0251688	0.75535	0.720569	0.0347803	FALSE	0.180063	2 vs 1	0.0695606	2 vs 1	0.510699	0.441138	Gna13:ENSMUST00000106702.3, Gna13:ENSMUST00000020930.13	Gna13	0.0813874	0.0426928	FALSE	FALSE	0.0542583	0.0882601	FALSE
347	0.000347223	0.000376934	0.921044	0.886271	0.0347729	FALSE	0.403413	1 vs 2	0.0695459	1 vs 2	0.842089	0.772543	Zfp131:ENSMUST00000177916.7, Zfp131:ENSMUST00000224946.1	Zfp131	0.0007749	0.000882756	FALSE	FALSE	0.000376934	0.000913629	FALSE
348	0.0344531	0.0635022	0.107375	0.0726872	0.034688	TRUE	0.428289	2 vs 1	0.0693761	2 vs 1	-0.785249	-0.854626	Grip1:ENSMUST00000041962.15, Grip1:ENSMUST00000130387.7	Grip1	NA	NA	FALSE	FALSE	0.0635022	NA	FALSE
349	0.000352277	0.0015708	0.961176	0.926948	0.034228	FALSE	0.668393	1 vs 2	0.068456	1 vs 2	0.922352	0.853896	Lrrc28:ENSMUST00000053950.9, Lrrc28:ENSMUST00000032775.11	Lrrc28	0.000781414	0.00329596	FALSE	FALSE	0.0015708	0.00348432	FALSE
350	0.331041	NA	0.93007	0.896	0.0340699	TRUE	0.434215	2 vs 1	0.0681399	2 vs 1	0.86014	0.792	Cep250:ENSMUST00000109618.1, Cep250:ENSMUST00000109619.8	Cep250	NA	NA	FALSE	FALSE	0.331041	NA	FALSE
351	0.041248	0.103776	0.783543	0.75	0.0335428	FALSE	0.18782	2 vs 1	0.0670855	2 vs 1	0.567086	0.5	Rai1:ENSMUST00000090806.4, Rai1:ENSMUST00000102688.1	Rai1	0.0642415	0.146377	FALSE	FALSE	0.103776	0.157345	FALSE
352	0.00107124	0.00989005	0.917636	0.884413	0.0332223	FALSE	0.375744	1 vs 2	0.0664447	1 vs 2	0.835271	0.768827	Zmynd8:ENSMUST00000088113.10, Zmynd8:ENSMUST00000109262.7	Zmynd8	0.00226632	0.0184107	FALSE	FALSE	0.00989005	0.0195663	FALSE
353	0.753114	NA	0.945455	0.912281	0.0331738	TRUE	0.510826	1 vs 2	0.0663477	1 vs 2	0.890909	0.824561	Palb2:ENSMUST00000106469.7, Palb2:ENSMUST00000106468.6	Palb2	NA	NA	FALSE	FALSE	0.753114	NA	FALSE
354	0.0114328	0.0124669	0.977106	0.943966	0.0331407	TRUE	0.929608	2 vs 1	0.0662814	2 vs 1	0.954212	0.887931	6430548M08Rik:ENSMUST00000108948.7, 6430548M08Rik:ENSMUST00000034281.12	6430548M08Rik	NA	NA	FALSE	FALSE	0.0124669	NA	FALSE
355	6.15337e-05	0.000247263	0.956648	0.923518	0.0331303	FALSE	0.602956	1 vs 2	0.0662606	1 vs 2	0.913297	0.847036	Eps15l1:ENSMUST00000163643.2, Eps15l1:ENSMUST00000212590.1	Eps15l1	0.00015115	0.000586644	FALSE	FALSE	0.000247263	0.000603322	FALSE
356	1	NA	0.366366	0.333333	0.033033	TRUE	0.14531	2 vs 1	0.0660661	2 vs 1	-0.267267	-0.333333	A830018L16Rik:ENSMUST00000135014.7, A830018L16Rik:ENSMUST00000048613.13	A830018L16Rik	NA	NA	FALSE	FALSE	1	NA	FALSE
357	0.787341	NA	0.669377	0.636364	0.0330131	TRUE	0.145752	2 vs 1	0.0660261	2 vs 1	0.338753	0.272727	Lrrc27:ENSMUST00000106104.7, Lrrc27:ENSMUST00000016124.14	Lrrc27	NA	NA	FALSE	FALSE	0.787341	NA	FALSE
358	0.506078	0.306993	0.742222	0.70922	0.0330024	TRUE	0.165953	1 vs 2	0.0660047	1 vs 2	0.484444	0.41844	Kansl1l:ENSMUST00000068168.9, Kansl1l:ENSMUST00000113987.1	Kansl1l	NA	NA	FALSE	FALSE	0.506078	NA	FALSE
359	0.000193769	0.000960683	0.827882	0.794979	0.0329033	FALSE	0.215489	2 vs 1	0.0658066	2 vs 1	0.655765	0.589958	Phf6:ENSMUST00000101587.9, Phf6:ENSMUST00000078944.12	Phf6	0.000446035	0.00207576	FALSE	FALSE	0.000960683	0.00221138	FALSE
360	0.0564607	NA	0.971545	0.938865	0.0326801	TRUE	0.798973	1 vs 2	0.0653602	1 vs 2	0.943089	0.877729	Zkscan8:ENSMUST00000045228.11, Zkscan8:ENSMUST00000110481.2	Zkscan8	NA	NA	FALSE	FALSE	0.0564607	NA	FALSE
361	5.26858e-06	9.03448e-06	0.0852516	0.0526912	0.0325604	FALSE	0.516134	1 vs 2	0.0651207	1 vs 2	-0.829497	-0.894618	Aktip:ENSMUST00000120426.8, Aktip:ENSMUST00000120213.8	Aktip	1.43903e-05	2.48448e-05	FALSE	FALSE	9.03448e-06	2.56327e-05	FALSE
362	0.223161	0.341108	0.85565	0.823276	0.0323737	TRUE	0.240916	1 vs 2	0.0647474	1 vs 2	0.711299	0.646552	Cacnb1:ENSMUST00000017552.12, Cacnb1:ENSMUST00000107561.8	Cacnb1	NA	NA	FALSE	FALSE	0.341108	NA	FALSE
363	0.135226	0.270896	0.12572	0.0933735	0.0323463	TRUE	0.333777	1 vs 2	0.0646926	1 vs 2	-0.74856	-0.813253	Recql:ENSMUST00000100832.9, Recql:ENSMUST00000111803.8	Recql	NA	NA	FALSE	FALSE	0.270896	NA	FALSE
364	0.0231765	NA	0.557983	0.525701	0.0322823	TRUE	1.07109	3 vs 1	0.0645645	3 vs 1	0.115966	0.0514019	Mbp:ENSMUST00000114676.7, Mbp:ENSMUST00000091789.10, Mbp:ENSMUST00000047865.13	Mbp	NA	NA	FALSE	FALSE	0.0231765	NA	FALSE
365	0.0826667	0.093622	0.902124	0.870159	0.0319643	TRUE	0.318678	2 vs 1	0.0639286	2 vs 1	0.804247	0.740319	Nek4:ENSMUST00000226833.1, Nek4:ENSMUST00000228328.1	Nek4	NA	NA	FALSE	FALSE	0.093622	NA	FALSE
366	0.888397	NA	0.838095	0.806452	0.0316436	TRUE	0.217007	1 vs 2	0.0632873	1 vs 2	0.67619	0.612903	Kif16b:ENSMUST00000230763.1, Kif16b:ENSMUST00000211861.1	Kif16b	NA	NA	FALSE	FALSE	0.888397	NA	FALSE
367	1.32836e-05	0.000103627	0.965405	0.934198	0.0312068	FALSE	0.675798	2 vs 1	0.0624135	2 vs 1	0.93081	0.868397	Mvk:ENSMUST00000137167.7, Mvk:ENSMUST00000043760.14	Mvk	3.37625e-05	0.000255895	FALSE	FALSE	0.000103627	0.000263385	FALSE
368	0.00182638	0.00538099	0.973519	0.942363	0.0311562	TRUE	0.810276	2 vs 1	0.0623125	2 vs 1	0.947039	0.884726	Ntpcr:ENSMUST00000065135.11, Ntpcr:ENSMUST00000034313.12	Ntpcr	NA	NA	FALSE	FALSE	0.00538099	NA	FALSE
369	0.0356898	0.0443837	0.243473	0.212335	0.0311384	FALSE	0.177178	2 vs 1	0.0622767	2 vs 1	-0.513054	-0.57533	Fbln1:ENSMUST00000109432.3, Fbln1:ENSMUST00000057410.13	Fbln1	0.0572915	0.0706635	FALSE	FALSE	0.0443837	0.0748591	FALSE
370	0.103648	0.497367	0.367528	0.336645	0.0308834	FALSE	0.135447	1 vs 2	0.0617667	1 vs 2	-0.264944	-0.326711	Gm14325:ENSMUST00000188914.6, Gm14325:ENSMUST00000150650.1	Gm14325	0.147607	0.564201	FALSE	FALSE	0.497367	0.614988	FALSE
371	0.627319	NA	0.400966	0.37013	0.0308363	TRUE	0.130219	1 vs 2	0.0616726	1 vs 2	-0.198068	-0.25974	Mcm9:ENSMUST00000237608.1, Mcm9:ENSMUST00000219838.2	Mcm9	NA	NA	FALSE	FALSE	0.627319	NA	FALSE
372	0.0257741	0.0802478	0.846595	0.816017	0.030578	FALSE	0.21855	2 vs 1	0.0611561	2 vs 1	0.693191	0.632035	Agpat5:ENSMUST00000033847.4, Agpat5:ENSMUST00000149565.7	Agpat5	0.0436727	0.118414	FALSE	FALSE	0.0802478	0.126598	FALSE
373	0.00606205	NA	0.966222	0.935829	0.0303933	TRUE	0.673711	1 vs 2	0.0607867	1 vs 2	0.932444	0.871658	Cpped1:ENSMUST00000096272.10, Cpped1:ENSMUST00000073371.6	Cpped1	NA	NA	FALSE	FALSE	0.00606205	NA	FALSE
374	0.148981	0.311528	0.315933	0.293713	0.0222195	TRUE	0.761629	3 vs 1	0.0604556	2 vs 1	0.205839	0.145383	Rnf170:ENSMUST00000110575.7, Rnf170:ENSMUST00000014022.14, Rnf170:ENSMUST00000209300.1	Rnf170	NA	NA	FALSE	FALSE	0.311528	NA	FALSE
375	0.861386	0.89755	0.72973	0.699507	0.0302223	TRUE	0.148299	2 vs 1	0.0604447	2 vs 1	0.459459	0.399015	Etl4:ENSMUST00000114610.7, Etl4:ENSMUST00000114606.7	Etl4	NA	NA	FALSE	FALSE	0.89755	NA	FALSE
376	0.0985405	NA	0.921698	0.891608	0.0300901	TRUE	0.358375	2 vs 1	0.0601802	2 vs 1	0.843397	0.783217	Clasp2:ENSMUST00000216817.1, Clasp2:ENSMUST00000111838.9	Clasp2	NA	NA	FALSE	FALSE	0.0985405	NA	FALSE
377	9.21293e-05	1.89111e-05	0.764794	0.734741	0.0300529	FALSE	0.160333	1 vs 2	0.0601058	1 vs 2	0.529587	0.469482	Ppp1r2:ENSMUST00000060188.13, Ppp1r2:ENSMUST00000115233.1	Ppp1r2	0.000220388	4.97445e-05	FALSE	FALSE	9.21293e-05	0.00023746	FALSE
378	2.27124e-14	3.13467e-13	0.955399	0.925568	0.0298308	FALSE	0.543846	1 vs 2	0.0596616	1 vs 2	0.910798	0.851136	Gnai2:ENSMUST00000055704.11, Gnai2:ENSMUST00000192615.5	Gnai2	9.13489e-14	1.26432e-12	FALSE	FALSE	3.13467e-13	1.28909e-12	FALSE
379	0.72051	NA	0.923963	0.894737	0.0292263	TRUE	0.357388	1 vs 2	0.0584526	1 vs 2	0.847926	0.789474	Slc45a1:ENSMUST00000037827.9, Slc45a1:ENSMUST00000117997.1	Slc45a1	NA	NA	FALSE	FALSE	0.72051	NA	FALSE
380	6.35449e-06	3.18897e-05	0.953475	0.924278	0.0291971	FALSE	0.518183	2 vs 1	0.0583941	2 vs 1	0.906951	0.848557	Azi2:ENSMUST00000134433.7, Azi2:ENSMUST00000044454.11	Azi2	1.69762e-05	8.15208e-05	FALSE	FALSE	3.18897e-05	8.4577e-05	FALSE
381	0.00260642	0.0153056	0.94674	0.917617	0.0291226	FALSE	0.467431	1 vs 2	0.0582452	1 vs 2	0.89348	0.835234	Uros:ENSMUST00000106146.7, Uros:ENSMUST00000106144.7	Uros	0.00524149	0.027235	FALSE	FALSE	0.0153056	0.0293291	FALSE
382	0.554111	NA	0.262963	0.234043	0.0289204	TRUE	0.154999	2 vs 1	0.0578408	2 vs 1	-0.474074	-0.531915	Armc9:ENSMUST00000131412.7, Armc9:ENSMUST00000027434.14	Armc9	NA	NA	FALSE	FALSE	0.554111	NA	FALSE
383	0.29141	NA	0.962393	0.934066	0.0283272	TRUE	0.591345	1 vs 2	0.0566545	1 vs 2	0.924786	0.868132	Pitpnm2:ENSMUST00000086123.10, Pitpnm2:ENSMUST00000159677.7	Pitpnm2	NA	NA	FALSE	FALSE	0.29141	NA	FALSE
384	0.421827	NA	0.123077	0.0948617	0.0282153	TRUE	0.292058	1 vs 2	0.0564305	1 vs 2	-0.753846	-0.810277	Cenpo:ENSMUST00000111169.9, Cenpo:ENSMUST00000140975.7	Cenpo	NA	NA	FALSE	FALSE	0.421827	NA	FALSE
385	0.00128235	0.00571771	0.880435	0.852523	0.0279115	FALSE	0.242024	2 vs 1	0.055823	2 vs 1	0.76087	0.705047	Iah1:ENSMUST00000223345.1, Iah1:ENSMUST00000076813.7	Iah1	0.00268194	0.0109816	FALSE	FALSE	0.00571771	0.0115618	FALSE
386	0.156514	0.333421	0.872745	0.84493	0.0278141	TRUE	0.230066	2 vs 1	0.0556282	2 vs 1	0.745489	0.689861	Blvrb:ENSMUST00000133750.7, Blvrb:ENSMUST00000037399.15	Blvrb	NA	NA	FALSE	FALSE	0.333421	NA	FALSE
387	1	NA	1	0.972222	0.0277778	TRUE	Inf	1 vs 2	0.0555556	1 vs 2	1	0.944444	Cnpy1:ENSMUST00000141601.8, Cnpy1:ENSMUST00000120068.1	Cnpy1	NA	NA	FALSE	FALSE	1	NA	FALSE
388	0.163271	0.252825	0.96063	0.933086	0.0275444	TRUE	0.559502	2 vs 1	0.0550888	2 vs 1	0.92126	0.866171	Bcl2l11:ENSMUST00000089634.11, Bcl2l11:ENSMUST00000110341.8	Bcl2l11	NA	NA	FALSE	FALSE	0.252825	NA	FALSE
389	0.430447	NA	0.96124	0.934211	0.0270298	TRUE	0.557602	2 vs 1	0.0540596	2 vs 1	0.922481	0.868421	Fn3k:ENSMUST00000103014.3, Fn3k:ENSMUST00000026175.8	Fn3k	NA	NA	FALSE	FALSE	0.430447	NA	FALSE
390	0.1233	0.233597	0.945586	0.918567	0.0270197	TRUE	0.432161	1 vs 2	0.0540394	1 vs 2	0.891173	0.837134	Grik2:ENSMUST00000218823.1, Grik2:ENSMUST00000220263.1	Grik2	NA	NA	FALSE	FALSE	0.233597	NA	FALSE
391	0.0209343	0.0294703	0.113287	0.0863539	0.0269328	FALSE	0.301389	2 vs 1	0.0538655	2 vs 1	-0.773427	-0.827292	Gm14419:ENSMUST00000108975.8, Gm14419:ENSMUST00000126358.7	Gm14419	0.0361412	0.049072	FALSE	FALSE	0.0294703	0.0518563	FALSE
392	0.0773846	0.169448	0.898121	0.871245	0.026876	TRUE	0.264507	1 vs 2	0.0537521	1 vs 2	0.796241	0.742489	Ctnna2:ENSMUST00000161846.7, Ctnna2:ENSMUST00000162273.1	Ctnna2	NA	NA	FALSE	FALSE	0.169448	NA	FALSE
393	0.220323	NA	0.977358	0.950617	0.0267412	TRUE	0.807558	1 vs 2	0.0534824	1 vs 2	0.954717	0.901235	Setdb2:ENSMUST00000161459.7, Setdb2:ENSMUST00000111253.2	Setdb2	NA	NA	FALSE	FALSE	0.220323	NA	FALSE
394	0.314357	0.348177	0.874309	0.847826	0.0264833	TRUE	0.221959	1 vs 2	0.0529666	1 vs 2	0.748619	0.695652	Mfsd6:ENSMUST00000156876.7, Mfsd6:ENSMUST00000087701.3	Mfsd6	NA	NA	FALSE	FALSE	0.348177	NA	FALSE
395	0.153501	0.261089	0.104235	0.0780856	0.0261489	TRUE	0.317611	1 vs 2	0.0522978	1 vs 2	-0.791531	-0.843829	Grk3:ENSMUST00000065167.8, Grk3:ENSMUST00000197776.1	Grk3	NA	NA	FALSE	FALSE	0.261089	NA	FALSE
396	0.297008	0.551579	0.572	0.545872	0.0261284	TRUE	0.106012	1 vs 2	0.0522569	1 vs 2	0.144	0.0917431	Atxn3:ENSMUST00000021606.11, Atxn3:ENSMUST00000161011.7	Atxn3	NA	NA	FALSE	FALSE	0.551579	NA	FALSE
397	0.432182	0.151175	0.58949	0.56338	0.0261094	TRUE	0.106964	2 vs 1	0.0522189	2 vs 1	0.178979	0.126761	Nucb2:ENSMUST00000183175.7, Nucb2:ENSMUST00000032895.14	Nucb2	NA	NA	FALSE	FALSE	0.432182	NA	FALSE
398	0.178703	NA	0.945165	0.919492	0.025673	TRUE	0.411563	1 vs 2	0.051346	1 vs 2	0.890329	0.838983	Pnpo:ENSMUST00000018803.11, Pnpo:ENSMUST00000107629.1	Pnpo	NA	NA	FALSE	FALSE	0.178703	NA	FALSE
399	0.0727284	0.250125	0.935661	0.910042	0.0256187	TRUE	0.362933	1 vs 2	0.0512373	1 vs 2	0.871321	0.820084	Papolg:ENSMUST00000020513.9, Papolg:ENSMUST00000102863.2	Papolg	NA	NA	FALSE	FALSE	0.250125	NA	FALSE
400	0.79198	0.433822	0.647922	0.62234	0.0255813	TRUE	0.140331	3 vs 1	0.0511627	3 vs 1	0.295844	0.244681	Ercc6l2:ENSMUST00000144763.1, Ercc6l2:ENSMUST00000021926.12, Ercc6l2:ENSMUST00000238465.1	Ercc6l2	NA	NA	FALSE	FALSE	0.79198	NA	FALSE
401	0.468166	0.284528	0.654698	0.629213	0.0254848	TRUE	0.110912	2 vs 1	0.0509695	2 vs 1	0.309396	0.258427	Ppp6r2:ENSMUST00000226221.1, Ppp6r2:ENSMUST00000238818.1	Ppp6r2	NA	NA	FALSE	FALSE	0.468166	NA	FALSE
402	1	NA	0.938462	0.913043	0.0254181	TRUE	0.373204	1 vs 2	0.0508361	1 vs 2	0.876923	0.826087	Gm12216:ENSMUST00000220191.1, Gm12216:ENSMUST00000121435.1	Gm12216	NA	NA	FALSE	FALSE	1	NA	FALSE
403	0.00293774	0.000615433	0.904506	0.879377	0.0251282	FALSE	0.261773	2 vs 1	0.0502563	2 vs 1	0.809011	0.758755	Bcl7b:ENSMUST00000111187.9, Bcl7b:ENSMUST00000031692.11	Bcl7b	0.00581196	0.00139626	FALSE	FALSE	0.00293774	0.00628779	FALSE
404	0.67341	NA	0.906306	0.881356	0.0249504	TRUE	0.264013	2 vs 1	0.0499007	2 vs 1	0.812613	0.762712	Nfe2l3:ENSMUST00000160133.1, Nfe2l3:ENSMUST00000005103.11	Nfe2l3	NA	NA	FALSE	FALSE	0.67341	NA	FALSE
405	0.0366135	0.0329702	0.808331	0.805876	0.00245529	FALSE	0.411291	2 vs 1	0.0492803	2 vs 1	0.223243	0.173963	Cracd:ENSMUST00000086909.4, Cracd:ENSMUST00000121851.1, Cracd:ENSMUST00000163347.7	Cracd	0.0585176	0.0541547	FALSE	FALSE	0.0366135	0.0629133	FALSE
406	2.48181e-13	2.27954e-13	0.5874	0.570789	0.0166109	FALSE	0.33259	3 vs 4	0.0490412	3 vs 4	0.393341	0.3443	Nisch:ENSMUST00000168206.7, Nisch:ENSMUST00000172142.7, Nisch:ENSMUST00000165981.7, Nisch:ENSMUST00000171735.1	Nisch	9.66321e-13	9.40308e-13	FALSE	FALSE	2.48181e-13	1.04407e-12	FALSE
407	0.182215	0.180248	0.887324	0.862816	0.0245081	TRUE	0.224816	1 vs 2	0.0490161	1 vs 2	0.774648	0.725632	Zfx:ENSMUST00000088102.11, Zfx:ENSMUST00000113925.7	Zfx	NA	NA	FALSE	FALSE	0.182215	NA	FALSE
408	0.249366	0.197443	0.85678	0.832353	0.0244275	TRUE	0.186407	1 vs 2	0.048855	1 vs 2	0.713561	0.664706	Galnt17:ENSMUST00000086023.11, Galnt17:ENSMUST00000160609.1	Galnt17	NA	NA	FALSE	FALSE	0.249366	NA	FALSE
409	0.247763	0.443653	0.87858	0.854227	0.0243522	TRUE	0.210898	1 vs 2	0.0487044	1 vs 2	0.757159	0.708455	Rap1gds1:ENSMUST00000098574.8, Rap1gds1:ENSMUST00000200396.1	Rap1gds1	NA	NA	FALSE	FALSE	0.443653	NA	FALSE
410	0.0391163	0.130061	0.712606	0.688276	0.0243297	FALSE	0.116001	1 vs 2	0.0486594	1 vs 2	0.425211	0.376552	Hbp1:ENSMUST00000172314.8, Hbp1:ENSMUST00000167458.8	Hbp1	0.0619765	0.179514	FALSE	FALSE	0.130061	0.192723	FALSE
411	4.30501e-07	3.77817e-05	0.839468	0.815312	0.0241562	FALSE	0.169373	2 vs 1	0.0483124	2 vs 1	0.678936	0.630623	Csnk1a1:ENSMUST00000163205.7, Csnk1a1:ENSMUST00000165123.7	Csnk1a1	1.24066e-06	9.52415e-05	FALSE	FALSE	3.77817e-05	9.94829e-05	FALSE
412	1.5256e-15	1.55705e-13	0.939106	0.915298	0.023808	FALSE	0.355683	2 vs 1	0.0476161	2 vs 1	0.878212	0.830596	Marchf5:ENSMUST00000112391.7, Marchf5:ENSMUST00000024078.14	Marchf5	6.72733e-15	6.49665e-13	FALSE	FALSE	1.55705e-13	6.62651e-13	FALSE
413	0.706957	NA	0.86612	0.849776	0.0163444	TRUE	0.207363	3 vs 2	0.0474773	3 vs 2	0.702186	0.654709	Crppa:ENSMUST00000220519.1, Crppa:ENSMUST00000221895.1, Crppa:ENSMUST00000223205.1	Crppa	NA	NA	FALSE	FALSE	0.706957	NA	FALSE
414	0.0408152	0.136578	0.91518	0.891637	0.0235429	FALSE	0.271016	2 vs 1	0.0470857	2 vs 1	0.83036	0.783274	Parp11:ENSMUST00000112193.7, Parp11:ENSMUST00000039680.6	Parp11	0.0641131	0.187086	FALSE	FALSE	0.136578	0.201563	FALSE
415	0.227539	0.588987	0.955651	0.932432	0.0232185	TRUE	0.445632	1 vs 2	0.046437	1 vs 2	0.911302	0.864865	Ltn1:ENSMUST00000039449.8, Ltn1:ENSMUST00000232095.1	Ltn1	NA	NA	FALSE	FALSE	0.588987	NA	FALSE
416	0.175091	0.120711	0.903107	0.879902	0.0232052	TRUE	0.240733	1 vs 2	0.0464103	1 vs 2	0.806214	0.759804	Srgap2:ENSMUST00000097588.8, Srgap2:ENSMUST00000186543.6	Srgap2	NA	NA	FALSE	FALSE	0.175091	NA	FALSE
417	0.00268661	0.0171631	0.934835	0.911666	0.0231695	FALSE	0.329306	2 vs 1	0.0463391	2 vs 1	0.86967	0.823331	Ip6k1:ENSMUST00000176854.6, Ip6k1:ENSMUST00000035214.10	Ip6k1	0.00537322	0.0299529	FALSE	FALSE	0.0171631	0.0322138	FALSE
418	0.0840209	0.147753	0.890523	0.86738	0.0231432	FALSE	0.218107	2 vs 1	0.0462864	2 vs 1	0.781046	0.734759	Phf12:ENSMUST00000108360.7, Phf12:ENSMUST00000049167.13	Phf12	0.123007	0.200129	FALSE	FALSE	0.147753	0.216311	FALSE
419	0.247314	0.047934	0.873023	0.853288	0.0197345	TRUE	0.227292	3 vs 2	0.0462855	3 vs 2	0.747803	0.701518	Negr1:ENSMUST00000041425.11, Negr1:ENSMUST00000106065.1, Negr1:ENSMUST00000074015.10	Negr1	NA	NA	FALSE	FALSE	0.247314	NA	FALSE
420	0.875311	NA	0.765957	0.742857	0.0231003	TRUE	0.124752	1 vs 2	0.0462006	1 vs 2	0.531915	0.485714	4930522L14Rik:ENSMUST00000112547.7, 4930522L14Rik:ENSMUST00000100937.3	4930522L14Rik	NA	NA	FALSE	FALSE	0.875311	NA	FALSE
421	0.0421212	0.101175	0.918534	0.89554	0.0229937	FALSE	0.273966	2 vs 1	0.0459874	2 vs 1	0.837067	0.79108	Hira:ENSMUST00000120532.8, Hira:ENSMUST00000004222.13	Hira	0.0653236	0.144544	FALSE	FALSE	0.101175	0.155495	FALSE
422	0.291971	0.0338373	0.198704	0.175729	0.0229747	TRUE	0.15114	2 vs 1	0.0459493	2 vs 1	-0.602592	-0.648541	Mms22l:ENSMUST00000138567.8, Mms22l:ENSMUST00000108222.8	Mms22l	NA	NA	FALSE	FALSE	0.291971	NA	FALSE
423	0.329338	0.0101475	0.513927	0.491577	0.0223497	TRUE	0.0894164	1 vs 2	0.0446994	1 vs 2	0.0278541	-0.0168453	Iqcc:ENSMUST00000046675.11, Iqcc:ENSMUST00000121442.1	Iqcc	NA	NA	FALSE	FALSE	0.329338	NA	FALSE
424	0.00474541	0.00560725	0.52016	0.501348	0.018812	FALSE	0.678093	1 vs 3	0.0442206	1 vs 2	-0.807531	-0.851752	Zfp64:ENSMUST00000109162.8, Zfp64:ENSMUST00000087971.10, Zfp64:ENSMUST00000109161.2	Zfp64	0.00904594	0.0108847	FALSE	FALSE	0.00560725	0.0114014	FALSE
425	0.0246384	0.0101264	0.156129	0.134153	0.0219764	FALSE	0.177414	2 vs 1	0.0439529	2 vs 1	-0.687742	-0.731695	Tdrkh:ENSMUST00000196386.4, Tdrkh:ENSMUST00000166032.7	Tdrkh	0.0421386	0.0187544	FALSE	FALSE	0.0246384	0.0450883	FALSE
426	0.0292772	0.0237612	0.918422	0.89688	0.0215414	FALSE	0.258062	1 vs 2	0.0430828	1 vs 2	0.836844	0.793761	Nfs1:ENSMUST00000029147.15, Nfs1:ENSMUST00000109600.1	Nfs1	0.0482679	0.0404944	FALSE	FALSE	0.0292772	0.0517655	FALSE
427	0.00192009	0.00813611	0.805407	0.784475	0.0209315	FALSE	0.128497	1 vs 2	0.041863	1 vs 2	0.610814	0.568951	Tcaf1:ENSMUST00000045054.10, Tcaf1:ENSMUST00000045140.4	Tcaf1	0.00392599	0.0154629	FALSE	FALSE	0.00813611	0.0163616	FALSE
428	1	NA	0.0662768	0.0454545	0.0208223	TRUE	0.399182	2 vs 1	0.0416445	2 vs 1	-0.867446	-0.909091	Dok7:ENSMUST00000101298.8, Dok7:ENSMUST00000050709.3	Dok7	NA	NA	FALSE	FALSE	1	NA	FALSE
429	0.0958543	0.215611	0.959273	0.938575	0.0206982	TRUE	0.432744	1 vs 2	0.0413965	1 vs 2	0.918546	0.87715	Gm14399:ENSMUST00000109062.7, Gm14399:ENSMUST00000109059.7	Gm14399	NA	NA	FALSE	FALSE	0.215611	NA	FALSE
430	2.03011e-10	5.16073e-11	0.962184	0.94152	0.020664	FALSE	0.457661	1 vs 2	0.041328	1 vs 2	0.924368	0.88304	Tmpo:ENSMUST00000072239.13, Tmpo:ENSMUST00000020123.6	Tmpo	7.07638e-10	1.8548e-10	FALSE	FALSE	2.03011e-10	7.21378e-10	FALSE
431	0.250008	0.369111	0.890202	0.869654	0.0205478	TRUE	0.1949	1 vs 2	0.0410955	1 vs 2	0.780403	0.739308	Rbm48:ENSMUST00000042753.13, Rbm48:ENSMUST00000121877.2	Rbm48	NA	NA	FALSE	FALSE	0.369111	NA	FALSE
432	0.885006	0.890831	0.765133	0.744681	0.0204523	TRUE	0.11059	2 vs 1	0.0409046	2 vs 1	0.530266	0.489362	Syt6:ENSMUST00000118117.7, Syt6:ENSMUST00000090697.10	Syt6	NA	NA	FALSE	FALSE	0.890831	NA	FALSE
433	0.000231418	0.00113779	0.917479	0.897071	0.0204081	FALSE	0.243482	2 vs 1	0.0408163	2 vs 1	0.834958	0.794141	Idnk:ENSMUST00000226010.1, Idnk:ENSMUST00000051490.14	Idnk	0.000526081	0.00242952	FALSE	FALSE	0.00113779	0.00257057	FALSE
434	0.521775	NA	0.861478	0.841121	0.0203561	TRUE	0.16102	1 vs 2	0.0407122	1 vs 2	0.722955	0.682243	Zfp773:ENSMUST00000211240.1, Zfp773:ENSMUST00000032622.8	Zfp773	NA	NA	FALSE	FALSE	0.521775	NA	FALSE
435	0.16792	0.164501	0.907662	0.887477	0.0201848	FALSE	0.220189	2 vs 1	0.0403695	2 vs 1	0.815324	0.774955	Dph5:ENSMUST00000106505.7, Dph5:ENSMUST00000043342.9	Dph5	0.230182	0.219536	FALSE	FALSE	0.16792	0.241963	FALSE
436	1.52903e-14	3.86605e-12	0.987626	0.967647	0.0199786	FALSE	0.981512	1 vs 2	0.0399571	1 vs 2	0.975251	0.935294	Ola1:ENSMUST00000028517.12, Ola1:ENSMUST00000100015.5	Ola1	6.21805e-14	1.47724e-11	FALSE	FALSE	3.86605e-12	1.52148e-11	FALSE
437	0.398329	0.0247382	0.681265	0.661495	0.0197701	TRUE	0.0896284	1 vs 2	0.0395403	1 vs 2	0.36253	0.32299	Ccdc88c:ENSMUST00000068411.4, Ccdc88c:ENSMUST00000223097.1	Ccdc88c	NA	NA	FALSE	FALSE	0.398329	NA	FALSE
438	0.00940021	0.0519056	0.967623	0.948113	0.0195094	FALSE	0.491971	1 vs 2	0.0390187	1 vs 2	0.935245	0.896226	Mpp3:ENSMUST00000100400.8, Mpp3:ENSMUST00000107167.1	Mpp3	0.0170479	0.0805203	FALSE	FALSE	0.0519056	0.0848101	FALSE
439	0.916377	NA	0.7875	0.768293	0.0192073	TRUE	0.111226	2 vs 1	0.0384146	2 vs 1	0.575	0.536585	Dennd1b:ENSMUST00000200533.4, Dennd1b:ENSMUST00000168527.7	Dennd1b	NA	NA	FALSE	FALSE	0.916377	NA	FALSE
440	0.00117686	0.0166629	0.771819	0.752869	0.0189499	FALSE	0.104638	1 vs 2	0.0378998	1 vs 2	0.543639	0.505739	Pfdn6:ENSMUST00000025163.13, Pfdn6:ENSMUST00000173678.2	Pfdn6	0.00247547	0.0292205	FALSE	FALSE	0.0166629	0.0314362	FALSE
441	0.265106	0.494877	0.911871	0.892944	0.0189274	TRUE	0.21553	1 vs 2	0.0378548	1 vs 2	0.823743	0.785888	Nln:ENSMUST00000109315.4, Nln:ENSMUST00000224945.1	Nln	NA	NA	FALSE	FALSE	0.494877	NA	FALSE
442	0.638648	NA	0.865079	0.846457	0.0186227	TRUE	0.151058	1 vs 2	0.0372453	1 vs 2	0.730159	0.692913	Lrp5:ENSMUST00000025856.16, Lrp5:ENSMUST00000176867.1	Lrp5	NA	NA	FALSE	FALSE	0.638648	NA	FALSE
443	1	NA	0.893617	0.875	0.018617	TRUE	0.182322	2 vs 1	0.037234	2 vs 1	0.787234	0.75	Smoc2:ENSMUST00000232923.1, Smoc2:ENSMUST00000024660.8	Smoc2	NA	NA	FALSE	FALSE	1	NA	FALSE
444	0.36959	0.095226	0.356115	0.3375	0.0186151	TRUE	0.0821891	1 vs 2	0.0372302	1 vs 2	-0.28777	-0.325	Tom1l2:ENSMUST00000095254.11, Tom1l2:ENSMUST00000102682.4	Tom1l2	NA	NA	FALSE	FALSE	0.36959	NA	FALSE
445	0.244531	0.247895	0.790409	0.772128	0.0182812	FALSE	0.107027	2 vs 1	0.0365624	2 vs 1	0.580819	0.544256	Pus3:ENSMUST00000121246.1, Pus3:ENSMUST00000034615.9	Pus3	0.32177	0.312451	FALSE	FALSE	0.247895	0.339812	FALSE
446	0.846564	NA	0.760673	0.742424	0.0182492	TRUE	0.0977684	1 vs 2	0.0364985	1 vs 2	0.521347	0.484848	Dusp15:ENSMUST00000123121.8, Dusp15:ENSMUST00000109811.3	Dusp15	NA	NA	FALSE	FALSE	0.846564	NA	FALSE
447	1	NA	0.318182	0.3	0.0181818	TRUE	0.0851578	1 vs 2	0.0363636	1 vs 2	-0.363636	-0.4	Daam2:ENSMUST00000057610.7, Daam2:ENSMUST00000224595.1	Daam2	NA	NA	FALSE	FALSE	1	NA	FALSE
448	0.366715	0.364282	0.916792	0.898693	0.0180988	TRUE	0.216748	2 vs 1	0.0361976	2 vs 1	0.833583	0.797386	Purg:ENSMUST00000070340.5, Purg:ENSMUST00000078058.4	Purg	NA	NA	FALSE	FALSE	0.366715	NA	FALSE
449	0.28852	0.612058	0.886945	0.868881	0.0180637	TRUE	0.168805	2 vs 1	0.0361274	2 vs 1	0.77389	0.737762	Zbtb24:ENSMUST00000216656.1, Zbtb24:ENSMUST00000080771.9	Zbtb24	NA	NA	FALSE	FALSE	0.612058	NA	FALSE
450	0.133538	0.369799	0.954649	0.936709	0.0179397	TRUE	0.352273	1 vs 2	0.0358793	1 vs 2	0.909297	0.873418	Gpcpd1:ENSMUST00000110136.7, Gpcpd1:ENSMUST00000028822.13	Gpcpd1	NA	NA	FALSE	FALSE	0.369799	NA	FALSE
451	0.241319	0.326572	0.993805	0.975904	0.0179017	TRUE	1.37655	1 vs 2	0.0358034	1 vs 2	0.987611	0.951807	Cpeb3:ENSMUST00000079754.10, Cpeb3:ENSMUST00000126781.1	Cpeb3	NA	NA	FALSE	FALSE	0.326572	NA	FALSE
452	0.225605	NA	0.953542	0.935714	0.0178281	TRUE	0.343671	2 vs 1	0.0356562	2 vs 1	0.907085	0.871429	Ermard:ENSMUST00000226599.1, Ermard:ENSMUST00000097393.10	Ermard	NA	NA	FALSE	FALSE	0.225605	NA	FALSE
453	0.202695	NA	0.944394	0.926582	0.0178115	TRUE	0.296911	1 vs 2	0.035623	1 vs 2	0.888788	0.853165	Mfn2:ENSMUST00000105716.8, Mfn2:ENSMUST00000105714.7	Mfn2	NA	NA	FALSE	FALSE	0.202695	NA	FALSE
454	0.400318	0.17986	0.864346	0.84658	0.0177653	TRUE	0.143835	2 vs 1	0.0355307	2 vs 1	0.728691	0.693161	Armt1:ENSMUST00000117489.7, Armt1:ENSMUST00000118544.7	Armt1	NA	NA	FALSE	FALSE	0.400318	NA	FALSE
455	0.249994	0.348539	0.98913	0.971429	0.0177019	TRUE	0.984499	2 vs 1	0.0354037	2 vs 1	0.978261	0.942857	Tlcd1:ENSMUST00000108338.1, Tlcd1:ENSMUST00000092880.13	Tlcd1	NA	NA	FALSE	FALSE	0.348539	NA	FALSE
456	0.215977	0.448883	0.627397	0.609729	0.0176681	FALSE	0.0748933	2 vs 1	0.0353363	2 vs 1	0.254795	0.219458	Phf14:ENSMUST00000115510.7, Phf14:ENSMUST00000115511.8	Phf14	0.287446	0.518931	FALSE	FALSE	0.448883	0.56072	FALSE
457	0.0261871	0.0184234	0.472862	0.46251	0.0103526	FALSE	0.494926	3 vs 1	0.0350801	3 vs 2	-0.798126	-0.833206	Zfp160:ENSMUST00000232595.1, Zfp160:ENSMUST00000088811.6, Zfp160:ENSMUST00000232473.1	Zfp160	0.0440395	0.0316952	FALSE	FALSE	0.0261871	0.0472937	FALSE
458	0.21488	0.340218	0.293059	0.275531	0.0175273	FALSE	0.0861623	1 vs 2	0.0350547	1 vs 2	-0.413883	-0.448938	Wdr70:ENSMUST00000045766.7, Wdr70:ENSMUST00000227371.1	Wdr70	0.28703	0.411663	FALSE	FALSE	0.340218	0.44313	FALSE
459	0.355797	0.272397	0.824986	0.807512	0.0174739	FALSE	0.116575	1 vs 2	0.0349477	1 vs 2	0.649971	0.615023	Rprd2:ENSMUST00000090791.7, Rprd2:ENSMUST00000197449.1	Rprd2	0.439938	0.339794	FALSE	FALSE	0.355797	0.461779	FALSE
460	0.217504	0.00473135	0.158144	0.140709	0.0174353	FALSE	0.137313	2 vs 1	0.0348707	2 vs 1	-0.683711	-0.718582	Nfx1:ENSMUST00000091614.6, Nfx1:ENSMUST00000098143.10	Nfx1	0.288429	0.00923376	FALSE	FALSE	0.217504	0.300402	FALSE
461	0.00318504	0.000309962	0.127566	0.110184	0.017382	FALSE	0.16621	1 vs 2	0.034764	1 vs 2	-0.744868	-0.779632	Slc25a27:ENSMUST00000024705.5, Slc25a27:ENSMUST00000233442.1	Slc25a27	0.00620066	0.000730624	FALSE	FALSE	0.00318504	0.00666128	FALSE
462	1	NA	0.0172414	0	0.0172414	TRUE	Inf	2 vs 1	0.0344828	2 vs 1	-0.965517	-1	Erich3:ENSMUST00000051862.7, Erich3:ENSMUST00000098496.8	Erich3	NA	NA	FALSE	FALSE	1	NA	FALSE
463	0.629148	0.537702	0.763941	0.746914	0.0170269	TRUE	0.0921876	1 vs 2	0.0340539	1 vs 2	0.527881	0.493827	Plch2:ENSMUST00000176194.7, Plch2:ENSMUST00000145662.8	Plch2	NA	NA	FALSE	FALSE	0.629148	NA	FALSE
464	0.49451	0.563624	0.62993	0.61296	0.01697	TRUE	0.0721451	2 vs 1	0.0339401	2 vs 1	0.25986	0.225919	Rabgap1:ENSMUST00000066055.9, Rabgap1:ENSMUST00000112920.1	Rabgap1	NA	NA	FALSE	FALSE	0.563624	NA	FALSE
465	0.337514	0.0903668	0.466865	0.449952	0.0169126	FALSE	0.0681284	1 vs 2	0.0338252	1 vs 2	-0.0662702	-0.100095	4930402H24Rik:ENSMUST00000044766.14, 4930402H24Rik:ENSMUST00000110243.7	4930402H24Rik	0.418746	0.13174	FALSE	FALSE	0.337514	0.441179	FALSE
466	0.000153561	0.000893981	0.917652	0.900888	0.0167642	FALSE	0.203737	2 vs 1	0.0335285	2 vs 1	0.835305	0.801776	Ociad1:ENSMUST00000166823.4, Ociad1:ENSMUST00000071081.12	Ociad1	0.000357982	0.00196676	FALSE	FALSE	0.000893981	0.00208406	FALSE
467	0.767029	0.307199	0.273224	0.256757	0.0164673	TRUE	0.0845681	1 vs 2	0.0329346	1 vs 2	-0.453552	-0.486486	Spata1:ENSMUST00000029839.10, Spata1:ENSMUST00000093951.2	Spata1	NA	NA	FALSE	FALSE	0.767029	NA	FALSE
468	0.0317917	0.0977002	0.931292	0.914923	0.0163682	FALSE	0.231413	2 vs 1	0.0327364	2 vs 1	0.862583	0.829847	Ap2b1:ENSMUST00000176430.7, Ap2b1:ENSMUST00000018875.12	Ap2b1	0.0517144	0.140735	FALSE	FALSE	0.0977002	0.151518	FALSE
469	0.0353359	0.186983	0.955164	0.939072	0.0160924	FALSE	0.323679	1 vs 2	0.0321848	1 vs 2	0.910328	0.878143	Cnpy3:ENSMUST00000059844.12, Cnpy3:ENSMUST00000121671.1	Cnpy3	0.0572255	0.243279	FALSE	FALSE	0.186983	0.26423	FALSE
470	0.251436	0.287657	0.960482	0.944444	0.0160378	TRUE	0.357472	1 vs 2	0.0320756	1 vs 2	0.920965	0.888889	C2cd2l:ENSMUST00000065080.9, C2cd2l:ENSMUST00000214602.1	C2cd2l	NA	NA	FALSE	FALSE	0.287657	NA	FALSE
471	0.397264	NA	0.901605	0.885638	0.0159671	TRUE	0.168248	2 vs 1	0.0319342	2 vs 1	0.803211	0.771277	Gfpt1:ENSMUST00000113655.7, Gfpt1:ENSMUST00000113658.7	Gfpt1	NA	NA	FALSE	FALSE	0.397264	NA	FALSE
472	0.470459	0.964703	0.932632	0.916667	0.0159649	TRUE	0.229939	1 vs 2	0.0319298	1 vs 2	0.865263	0.833333	Rab21:ENSMUST00000020343.8, Rab21:ENSMUST00000218831.1	Rab21	NA	NA	FALSE	FALSE	0.964703	NA	FALSE
473	0.506073	0.0166706	0.667478	0.651663	0.0158147	TRUE	0.0704419	2 vs 1	0.0316294	2 vs 1	0.334956	0.303327	Snx21:ENSMUST00000152471.1, Snx21:ENSMUST00000172577.7	Snx21	NA	NA	FALSE	FALSE	0.506073	NA	FALSE
474	0.560913	NA	0.92735	0.911602	0.0157482	TRUE	0.213327	1 vs 2	0.0314964	1 vs 2	0.854701	0.823204	Ppp1r12b:ENSMUST00000168381.7, Ppp1r12b:ENSMUST00000112163.1	Ppp1r12b	NA	NA	FALSE	FALSE	0.560913	NA	FALSE
475	0.44336	0.722172	0.635565	0.62	0.0155649	FALSE	0.0666173	2 vs 1	0.0311297	2 vs 1	0.27113	0.24	Fbxo16:ENSMUST00000169656.2, Fbxo16:ENSMUST00000226005.1	Fbxo16	0.530293	0.775587	FALSE	FALSE	0.722172	0.820854	FALSE
476	0.285598	0.0656652	0.0880705	0.072643	0.0154275	TRUE	0.209356	1 vs 2	0.030855	1 vs 2	-0.823859	-0.854714	Taf8:ENSMUST00000233174.1, Taf8:ENSMUST00000233121.1	Taf8	NA	NA	FALSE	FALSE	0.285598	NA	FALSE
477	0.0135171	0.0454419	0.919436	0.904114	0.0153223	FALSE	0.190918	1 vs 2	0.0306447	1 vs 2	0.838873	0.808228	Pcnp:ENSMUST00000114444.8, Pcnp:ENSMUST00000122253.1	Pcnp	0.0238998	0.0717191	FALSE	FALSE	0.0454419	0.0755987	FALSE
478	0.832382	NA	0.5	0.484848	0.0151515	TRUE	0.0606246	1 vs 2	0.030303	1 vs 2	0	-0.030303	Rab43:ENSMUST00000032134.8, Rab43:ENSMUST00000032135.5	Rab43	NA	NA	FALSE	FALSE	0.832382	NA	FALSE
479	1	NA	0.909091	0.894118	0.0149733	TRUE	0.169076	1 vs 2	0.0299465	1 vs 2	0.818182	0.788235	Plch1:ENSMUST00000162269.8, Plch1:ENSMUST00000161052.2	Plch1	NA	NA	FALSE	FALSE	1	NA	FALSE
480	0.0111227	0.0314042	0.734556	0.734276	0.000279241	FALSE	-0.175828	2 vs 3	0.0296577	1 vs 2	0.513865	0.484208	Cryzl1:ENSMUST00000073466.12, Cryzl1:ENSMUST00000124282.7, Cryzl1:ENSMUST00000114023.2	Cryzl1	0.0199554	0.0518169	FALSE	FALSE	0.0314042	0.0544736	FALSE
481	0.00729855	0.0268151	0.89231	0.877486	0.0148242	FALSE	0.145723	1 vs 2	0.0296484	1 vs 2	0.784621	0.754972	Ssr3:ENSMUST00000029414.11, Ssr3:ENSMUST00000119896.1	Ssr3	0.0136289	0.0450643	FALSE	FALSE	0.0268151	0.0481095	FALSE
482	0.057612	0.00167548	0.981022	0.974438	0.00658427	TRUE	-0.729515	2 vs 3	0.0293867	1 vs 2	0.954745	0.925358	Ttc39b:ENSMUST00000102823.9, Ttc39b:ENSMUST00000048274.10, Ttc39b:ENSMUST00000030205.13	Ttc39b	NA	NA	FALSE	FALSE	0.057612	NA	FALSE
483	0.366295	0.0547164	0.648474	0.634093	0.0143816	FALSE	0.0625244	2 vs 1	0.0287632	2 vs 1	0.296948	0.268185	Nosip:ENSMUST00000210520.1, Nosip:ENSMUST00000003513.10	Nosip	0.449879	0.0841612	FALSE	FALSE	0.366295	0.470999	FALSE
484	0.929881	NA	0.466431	0.452055	0.0143763	TRUE	0.057894	2 vs 1	0.0287526	2 vs 1	-0.0671378	-0.0958904	Prdm10:ENSMUST00000117389.7, Prdm10:ENSMUST00000215499.1	Prdm10	NA	NA	FALSE	FALSE	0.929881	NA	FALSE
485	3.11889e-06	1.94904e-05	0.893031	0.87874	0.0142912	FALSE	0.141531	1 vs 2	0.0285823	1 vs 2	0.786062	0.757479	Glo1:ENSMUST00000236335.1, Glo1:ENSMUST00000235171.1	Glo1	8.58282e-06	5.08994e-05	FALSE	FALSE	1.94904e-05	5.28407e-05	FALSE
486	0.275064	0.333464	0.935794	0.921606	0.0141878	FALSE	0.214925	2 vs 1	0.0283756	2 vs 1	0.871588	0.843212	Astn1:ENSMUST00000194369.5, Astn1:ENSMUST00000046110.15	Astn1	0.354484	0.404841	FALSE	FALSE	0.333464	0.437447	FALSE
487	0.321571	0.577265	0.376801	0.3627	0.0141007	FALSE	0.0605147	2 vs 1	0.0282015	2 vs 1	-0.246398	-0.2746	Arid4b:ENSMUST00000110533.1, Arid4b:ENSMUST00000039538.14	Arid4b	0.400323	0.638863	FALSE	FALSE	0.577265	0.690454	FALSE
488	0.0673696	0.125569	0.936919	0.922832	0.0140872	FALSE	0.216717	2 vs 1	0.0281744	2 vs 1	0.873838	0.845663	Cnep1r1:ENSMUST00000121097.7, Cnep1r1:ENSMUST00000095214.9	Cnep1r1	0.100233	0.173976	FALSE	FALSE	0.125569	0.187585	FALSE
489	0.102516	0.256473	0.620317	0.606242	0.0140744	FALSE	0.0593485	2 vs 1	0.0281487	2 vs 1	0.240634	0.212485	Papola:ENSMUST00000168186.7, Papola:ENSMUST00000109901.8	Papola	0.146566	0.322144	FALSE	FALSE	0.256473	0.350257	FALSE
490	0.405032	0.0686762	0.911055	0.897129	0.0139259	TRUE	0.16086	2 vs 1	0.0278518	2 vs 1	0.82211	0.794258	Plekhb2:ENSMUST00000156687.7, Plekhb2:ENSMUST00000027297.10	Plekhb2	NA	NA	FALSE	FALSE	0.405032	NA	FALSE
491	1	NA	0.0138889	0	0.0138889	TRUE	Inf	1 vs 2	0.0277778	1 vs 2	-0.972222	-1	Adamts20:ENSMUST00000035342.10, Adamts20:ENSMUST00000155907.1	Adamts20	NA	NA	FALSE	FALSE	1	NA	FALSE
492	0.00882335	0.0313422	0.891376	0.877619	0.0137575	FALSE	0.134805	1 vs 2	0.027515	1 vs 2	0.782752	0.755237	Cpsf6:ENSMUST00000176686.7, Cpsf6:ENSMUST00000069168.12	Cpsf6	0.0161467	0.0518169	FALSE	FALSE	0.0313422	0.0544736	FALSE
493	0.638459	0.829323	0.859624	0.845902	0.0137221	TRUE	0.109356	1 vs 2	0.0274442	1 vs 2	0.719247	0.691803	Ccdc28a:ENSMUST00000080860.12, Ccdc28a:ENSMUST00000052648.8	Ccdc28a	NA	NA	FALSE	FALSE	0.829323	NA	FALSE
494	0.0491944	0.00466015	0.402006	0.388354	0.013652	FALSE	0.0571227	1 vs 2	0.027304	1 vs 2	-0.195988	-0.223292	Wtap:ENSMUST00000159551.7, Wtap:ENSMUST00000159986.7	Wtap	0.0750215	0.00914397	FALSE	FALSE	0.0491944	0.0807406	FALSE
495	0.769678	NA	0.969325	0.956044	0.0132812	TRUE	0.373543	1 vs 2	0.0265624	1 vs 2	0.93865	0.912088	Arhgap42:ENSMUST00000093893.11, Arhgap42:ENSMUST00000183182.1	Arhgap42	NA	NA	FALSE	FALSE	0.769678	NA	FALSE
496	0.638814	NA	0.0730117	0.0597826	0.0132291	TRUE	0.214076	2 vs 1	0.0264583	2 vs 1	-0.853977	-0.880435	Odad1:ENSMUST00000210602.1, Odad1:ENSMUST00000210039.2	Odad1	NA	NA	FALSE	FALSE	0.638814	NA	FALSE
497	0.0410172	0.0753091	0.891709	0.878603	0.0131051	FALSE	0.129042	2 vs 1	0.0262102	2 vs 1	0.783417	0.757207	Tsnax:ENSMUST00000212603.1, Tsnax:ENSMUST00000075896.6	Tsnax	0.0641551	0.11158	FALSE	FALSE	0.0753091	0.119321	FALSE
498	0.0126513	0.00570356	0.91354	0.90077	0.0127693	FALSE	0.151828	1 vs 2	0.0255387	1 vs 2	0.82708	0.801541	Ufm1:ENSMUST00000146598.7, Ufm1:ENSMUST00000122330.1	Ufm1	0.0225872	0.0109816	FALSE	FALSE	0.0126513	0.0244994	FALSE
499	0.485857	NA	0.0580357	0.0452962	0.0127395	TRUE	0.26127	2 vs 1	0.0254791	2 vs 1	-0.883929	-0.909408	Nol9:ENSMUST00000084116.12, Nol9:ENSMUST00000103197.4	Nol9	NA	NA	FALSE	FALSE	0.485857	NA	FALSE
500	0.313365	0.416439	0.181975	0.169288	0.0126865	FALSE	0.0876546	1 vs 2	0.025373	1 vs 2	-0.63605	-0.661423	Nkapd1:ENSMUST00000131351.7, Nkapd1:ENSMUST00000145139.7	Nkapd1	0.395488	0.489215	FALSE	FALSE	0.416439	0.527393	FALSE
501	0.097026	0.155603	0.876827	0.864246	0.0125802	FALSE	0.1117	1 vs 2	0.0251605	1 vs 2	0.753653	0.728493	Rnaseh2a:ENSMUST00000128972.8, Rnaseh2a:ENSMUST00000065049.14	Rnaseh2a	0.139982	0.209199	FALSE	FALSE	0.155603	0.225995	FALSE
502	1	NA	0.644068	0.631579	0.0124888	TRUE	0.0540672	1 vs 2	0.0249777	1 vs 2	0.288136	0.263158	Tbc1d2:ENSMUST00000084621.11, Tbc1d2:ENSMUST00000107750.1	Tbc1d2	NA	NA	FALSE	FALSE	1	NA	FALSE
503	8.16796e-09	3.29448e-07	0.944721	0.932257	0.0124642	FALSE	0.216612	2 vs 1	0.0249284	2 vs 1	0.889442	0.864513	Ndfip1:ENSMUST00000236052.1, Ndfip1:ENSMUST00000025293.4	Ndfip1	2.53345e-08	9.80242e-07	FALSE	FALSE	3.29448e-07	9.96512e-07	FALSE
504	1	NA	0.0124224	0	0.0124224	TRUE	Inf	2 vs 1	0.0248447	2 vs 1	-0.975155	-1	Zfp493:ENSMUST00000164936.9, Zfp493:ENSMUST00000181319.1	Zfp493	NA	NA	FALSE	FALSE	1	NA	FALSE
505	1	NA	0.762376	0.75	0.0123762	TRUE	0.0671393	1 vs 2	0.0247525	1 vs 2	0.524752	0.5	Kcnj6:ENSMUST00000095873.11, Kcnj6:ENSMUST00000099508.3	Kcnj6	NA	NA	FALSE	FALSE	1	NA	FALSE
506	0.245284	0.412661	0.924397	0.912033	0.0123636	FALSE	0.164926	1 vs 2	0.0247272	1 vs 2	0.848794	0.824066	Zfp113:ENSMUST00000049393.14, Zfp113:ENSMUST00000132318.1	Zfp113	0.32177	0.4887	FALSE	FALSE	0.412661	0.524423	FALSE
507	0.736388	NA	0.858824	0.846512	0.0123119	TRUE	0.0980537	1 vs 2	0.0246238	1 vs 2	0.717647	0.693023	Adat1:ENSMUST00000034427.11, Adat1:ENSMUST00000120457.1	Adat1	NA	NA	FALSE	FALSE	0.736388	NA	FALSE
508	6.35417e-09	4.17405e-10	0.867074	0.854921	0.0121532	FALSE	0.101602	1 vs 2	0.0243064	1 vs 2	0.734147	0.709841	Npm1:ENSMUST00000075641.9, Npm1:ENSMUST00000109354.9	Npm1	2.00485e-08	1.39007e-09	FALSE	FALSE	6.35417e-09	2.07645e-08	FALSE
509	1	0.995708	0.261905	0.25	0.0119048	TRUE	0.0625204	1 vs 2	0.0238095	1 vs 2	-0.47619	-0.5	Spaca1:ENSMUST00000084734.10, Spaca1:ENSMUST00000029927.5	Spaca1	NA	NA	FALSE	FALSE	1	NA	FALSE
510	0.500249	0.247312	0.749557	0.737767	0.01179	FALSE	0.0618561	2 vs 1	0.0235799	2 vs 1	0.499113	0.475533	Stradb:ENSMUST00000114296.7, Stradb:ENSMUST00000027185.10	Stradb	0.586831	0.312451	FALSE	FALSE	0.500249	0.616469	FALSE
511	0.22349	0.232149	0.0225352	0.0108401	0.0116951	TRUE	0.74372	1 vs 2	0.0233902	1 vs 2	-0.95493	-0.97832	Tsga10:ENSMUST00000041815.14, Tsga10:ENSMUST00000123082.8	Tsga10	NA	NA	FALSE	FALSE	0.232149	NA	FALSE
512	0.176204	0.165913	0.913213	0.90184	0.0113726	FALSE	0.135669	1 vs 2	0.0227452	1 vs 2	0.826426	0.803681	Orc4:ENSMUST00000028098.10, Orc4:ENSMUST00000090976.9	Orc4	0.239742	0.219805	FALSE	FALSE	0.176204	0.251348	FALSE
513	0.256023	0.375975	0.974731	0.96347	0.0112609	TRUE	0.380174	2 vs 1	0.0225217	2 vs 1	0.949462	0.926941	St3gal2:ENSMUST00000117534.7, St3gal2:ENSMUST00000034197.4	St3gal2	NA	NA	FALSE	FALSE	0.375975	NA	FALSE
514	0.12722	0.0933843	0.749629	0.738514	0.011116	FALSE	0.0583804	2 vs 1	0.0222319	2 vs 1	0.499259	0.477027	Fam220a:ENSMUST00000118121.1, Fam220a:ENSMUST00000119488.1	Fam220a	0.177719	0.135594	FALSE	FALSE	0.12722	0.189278	FALSE
515	0.365752	0.261752	0.107303	0.096242	0.0110606	FALSE	0.121101	1 vs 2	0.0221211	1 vs 2	-0.785395	-0.807516	Dtd2:ENSMUST00000085404.9, Dtd2:ENSMUST00000021339.7	Dtd2	0.449879	0.327642	FALSE	FALSE	0.365752	0.470999	FALSE
516	0.842004	NA	0.142529	0.131579	0.0109498	TRUE	0.0926256	2 vs 1	0.0218996	2 vs 1	-0.714943	-0.736842	Tmem265:ENSMUST00000084563.10, Tmem265:ENSMUST00000190278.2	Tmem265	NA	NA	FALSE	FALSE	0.842004	NA	FALSE
517	0.8356	0.474879	0.106101	0.0952381	0.0108627	TRUE	0.120088	2 vs 1	0.0217254	2 vs 1	-0.787798	-0.809524	Cd59b:ENSMUST00000090429.7, Cd59b:ENSMUST00000111132.7	Cd59b	NA	NA	FALSE	FALSE	0.8356	NA	FALSE
518	0.200808	0.423767	0.896593	0.885876	0.0107168	FALSE	0.110636	2 vs 1	0.0214337	2 vs 1	0.793185	0.771751	Tdrd3:ENSMUST00000169504.7, Tdrd3:ENSMUST00000168275.8	Tdrd3	0.272207	0.493037	FALSE	FALSE	0.423767	0.534823	FALSE
519	0.795778	NA	0.903047	0.892405	0.010642	TRUE	0.116003	1 vs 2	0.0212841	1 vs 2	0.806094	0.78481	Apaf1:ENSMUST00000159110.7, Apaf1:ENSMUST00000161987.7	Apaf1	NA	NA	FALSE	FALSE	0.795778	NA	FALSE
520	0.893851	NA	0.748428	0.737885	0.0105422	TRUE	0.163891	3 vs 2	0.0210844	3 vs 1	0.496855	0.475771	Wwox:ENSMUST00000160862.7, Wwox:ENSMUST00000109108.8, Wwox:ENSMUST00000004756.13	Wwox	NA	NA	FALSE	FALSE	0.893851	NA	FALSE
521	0.682991	NA	0.962818	0.952381	0.0104371	TRUE	0.258307	2 vs 1	0.0208741	2 vs 1	0.925636	0.904762	Zfp667:ENSMUST00000153840.1, Zfp667:ENSMUST00000086327.11	Zfp667	NA	NA	FALSE	FALSE	0.682991	NA	FALSE
522	0.582356	NA	0.965382	0.955	0.0103825	TRUE	0.273115	1 vs 2	0.0207649	1 vs 2	0.930765	0.91	Smarca1:ENSMUST00000088973.10, Smarca1:ENSMUST00000141084.2	Smarca1	NA	NA	FALSE	FALSE	0.582356	NA	FALSE
523	0.912727	NA	0.893246	0.882979	0.0102675	TRUE	0.103392	2 vs 1	0.0205349	2 vs 1	0.786492	0.765957	Gcnt2:ENSMUST00000223570.1, Gcnt2:ENSMUST00000067778.7	Gcnt2	NA	NA	FALSE	FALSE	0.912727	NA	FALSE
524	0.889754	NA	0.0744681	0.0642857	0.0101824	TRUE	0.157975	2 vs 1	0.0203647	2 vs 1	-0.851064	-0.871429	Wls:ENSMUST00000068952.9, Wls:ENSMUST00000198878.1	Wls	NA	NA	FALSE	FALSE	0.889754	NA	FALSE
525	0.282211	0.186857	0.845212	0.83522	0.00999202	FALSE	0.0744472	2 vs 1	0.019984	2 vs 1	0.690423	0.670439	Qrich1:ENSMUST00000193258.5, Qrich1:ENSMUST00000006851.14	Qrich1	0.362419	0.243279	FALSE	FALSE	0.282211	0.383975	FALSE
526	0.732526	0.7559	0.899678	0.89934	0.000338178	TRUE	-0.258235	2 vs 3	0.0199755	1 vs 2	0.775751	0.755776	Zfp799:ENSMUST00000202988.3, Zfp799:ENSMUST00000201876.3, Zfp799:ENSMUST00000201499.1	Zfp799	NA	NA	FALSE	FALSE	0.7559	NA	FALSE
527	0.611238	0.622032	0.327404	0.317623	0.00978069	FALSE	0.0447658	1 vs 2	0.0195614	1 vs 2	-0.345193	-0.364754	Cwc25:ENSMUST00000018685.8, Cwc25:ENSMUST00000107579.1	Cwc25	0.694761	0.682168	FALSE	FALSE	0.622032	0.734399	FALSE
528	0.588438	0.611192	0.889955	0.880623	0.00933202	FALSE	0.0919385	1 vs 2	0.018664	1 vs 2	0.77991	0.761246	Terf2:ENSMUST00000133925.7, Terf2:ENSMUST00000116425.2	Terf2	0.675136	0.672311	FALSE	FALSE	0.611192	0.723936	FALSE
529	0.301464	0.0617852	0.961603	0.95232	0.00928308	FALSE	0.226233	1 vs 2	0.0185662	1 vs 2	0.923205	0.904639	Hsd17b7:ENSMUST00000027989.12, Hsd17b7:ENSMUST00000111353.3	Hsd17b7	0.38311	0.0939062	FALSE	FALSE	0.301464	0.407143	FALSE
530	0.0488995	0.104037	0.9034	0.894132	0.00926771	FALSE	0.101923	2 vs 1	0.0185354	2 vs 1	0.8068	0.788264	Cul1:ENSMUST00000143941.2, Cul1:ENSMUST00000031697.8	Cul1	0.0748838	0.146377	FALSE	FALSE	0.104037	0.157345	FALSE
531	1	NA	0.509091	0.5	0.00909091	TRUE	0.0363676	1 vs 2	0.0181818	1 vs 2	0.0181818	0	Cfap100:ENSMUST00000062750.11, Cfap100:ENSMUST00000134224.7	Cfap100	NA	NA	FALSE	FALSE	1	NA	FALSE
532	0.600716	0.811125	0.779992	0.771008	0.00898378	FALSE	0.0516069	2 vs 1	0.0179676	2 vs 1	0.559984	0.542017	Trp53rkb:ENSMUST00000065753.1, Trp53rkb:ENSMUST00000151826.1	Trp53rkb	0.684929	0.850978	FALSE	FALSE	0.811125	0.902346	FALSE
533	0.00307688	2.03325e-06	0.94398	0.935195	0.00878457	FALSE	0.155016	2 vs 1	0.0175691	2 vs 1	0.88796	0.870391	Bcl7a:ENSMUST00000117971.1, Bcl7a:ENSMUST00000031391.8	Bcl7a	0.00602213	5.81157e-06	FALSE	FALSE	0.00307688	0.00647205	FALSE
534	0.271376	0.311579	0.897133	0.88836	0.00877288	FALSE	0.0916683	2 vs 1	0.0175458	2 vs 1	0.794266	0.77672	Slc35b2:ENSMUST00000226086.1, Slc35b2:ENSMUST00000223987.1	Slc35b2	0.350967	0.3834	FALSE	FALSE	0.311579	0.416196	FALSE
535	0.595505	0.851931	0.684897	0.676152	0.00874517	FALSE	0.040226	2 vs 1	0.0174903	2 vs 1	0.369794	0.352304	Clcc1:ENSMUST00000106613.1, Clcc1:ENSMUST00000106609.7	Clcc1	0.681109	0.886288	FALSE	FALSE	0.851931	0.936356	FALSE
536	0.558754	0.797831	0.932955	0.924242	0.00871212	TRUE	0.13155	2 vs 1	0.0174242	2 vs 1	0.865909	0.848485	Ppp1r9a:ENSMUST00000175962.1, Ppp1r9a:ENSMUST00000035813.8	Ppp1r9a	NA	NA	FALSE	FALSE	0.797831	NA	FALSE
537	0.30399	0.324671	0.929614	0.920915	0.00869945	FALSE	0.125938	1 vs 2	0.0173989	1 vs 2	0.859229	0.84183	Mettl6:ENSMUST00000055303.4, Mettl6:ENSMUST00000228727.1	Mettl6	0.384984	0.396475	FALSE	FALSE	0.324671	0.42851	FALSE
538	0.850264	NA	0.467874	0.46283	0.00504449	TRUE	0.130814	1 vs 3	0.0172914	2 vs 3	0.789474	0.772182	Atf7:ENSMUST00000184906.7, Atf7:ENSMUST00000184616.7, Atf7:ENSMUST00000108828.8	Atf7	NA	NA	FALSE	FALSE	0.850264	NA	FALSE
539	0.73811	0.0298563	0.750789	0.742268	0.0085206	TRUE	0.0450325	1 vs 2	0.0170412	1 vs 2	0.501577	0.484536	Trps1:ENSMUST00000165201.8, Trps1:ENSMUST00000183421.1	Trps1	NA	NA	FALSE	FALSE	0.73811	NA	FALSE
540	0.644234	0.485763	0.917355	0.909091	0.00826446	TRUE	0.10436	2 vs 1	0.0165289	2 vs 1	0.834711	0.818182	Dym:ENSMUST00000236220.1, Dym:ENSMUST00000039608.8	Dym	NA	NA	FALSE	FALSE	0.644234	NA	FALSE
541	1	NA	0.0705596	0.0625	0.00805961	TRUE	0.129925	2 vs 1	0.0161192	2 vs 1	-0.858881	-0.875	Kctd16:ENSMUST00000096572.1, Kctd16:ENSMUST00000236889.1	Kctd16	NA	NA	FALSE	FALSE	1	NA	FALSE
542	6.9626e-07	4.40646e-06	0.475022	0.467033	0.00798966	FALSE	0.032067	1 vs 2	0.0159793	1 vs 2	-0.0499551	-0.0659344	Rpl34:ENSMUST00000062601.13, Rpl34:ENSMUST00000133802.5	Rpl34	1.97544e-06	1.23996e-05	FALSE	FALSE	4.40646e-06	1.27997e-05	FALSE
543	0.915021	0.630595	0.568205	0.560241	0.00796416	TRUE	0.0323918	1 vs 2	0.0159283	1 vs 2	0.13641	0.120482	Ncoa7:ENSMUST00000215740.1, Ncoa7:ENSMUST00000215725.1	Ncoa7	NA	NA	FALSE	FALSE	0.915021	NA	FALSE
544	0.656044	0.982879	0.884877	0.87695	0.00792729	FALSE	0.075591	2 vs 1	0.0158546	2 vs 1	0.769754	0.753899	Casd1:ENSMUST00000181734.7, Casd1:ENSMUST00000015333.11	Casd1	0.732049	0.985594	FALSE	FALSE	0.982879	1	FALSE
545	0.579283	0.0496264	0.801354	0.793469	0.00788526	FALSE	0.0488161	1 vs 2	0.0157705	1 vs 2	0.602708	0.586937	Vps53:ENSMUST00000056601.10, Vps53:ENSMUST00000129256.1	Vps53	0.666722	0.0773149	FALSE	FALSE	0.579283	0.690611	FALSE
546	0.634476	0.139288	0.912359	0.910886	0.00147322	FALSE	-0.185066	2 vs 1	0.0154814	3 vs 2	0.803102	0.78762	Harbi1:ENSMUST00000142692.1, Harbi1:ENSMUST00000111322.1, Harbi1:ENSMUST00000090608.5	Harbi1	0.712326	0.190081	FALSE	FALSE	0.634476	0.744289	FALSE
547	0.670863	NA	0.985163	0.977528	0.00763511	TRUE	0.422936	1 vs 2	0.0152702	1 vs 2	0.970326	0.955056	Coro7:ENSMUST00000038552.12, Coro7:ENSMUST00000090480.5	Coro7	NA	NA	FALSE	FALSE	0.670863	NA	FALSE
548	0.0451875	NA	0.0148675	0.00735294	0.00751454	FALSE	0.711675	1 vs 2	0.0150291	1 vs 2	-0.970265	-0.985294	Smim4:ENSMUST00000064032.9, Smim4:ENSMUST00000090205.4	Smim4	0.0697833	NA	FALSE	FALSE	0.0451875	0.0755987	FALSE
549	0.870362	0.576016	0.84142	0.834081	0.0073394	TRUE	0.0540039	2 vs 1	0.0146788	2 vs 1	0.68284	0.668161	Slc12a6:ENSMUST00000110987.8, Slc12a6:ENSMUST00000028549.13	Slc12a6	NA	NA	FALSE	FALSE	0.870362	NA	FALSE
550	1	0.996143	0.45	0.442748	0.00725191	TRUE	0.0293457	2 vs 1	0.0145038	2 vs 1	-0.1	-0.114504	Raet1e:ENSMUST00000181645.7, Raet1e:ENSMUST00000178026.1	Raet1e	NA	NA	FALSE	FALSE	1	NA	FALSE
551	0.0516638	0.148514	0.490531	0.483751	0.00677961	FALSE	0.0271368	1 vs 2	0.0135592	1 vs 2	-0.0189381	-0.0324973	Ndufab1:ENSMUST00000123296.7, Ndufab1:ENSMUST00000033157.9	Ndufab1	0.0781362	0.200411	FALSE	FALSE	0.148514	0.216558	FALSE
552	0.99649	0.976318	0.686957	0.680328	0.00662865	TRUE	0.03065	2 vs 1	0.0132573	2 vs 1	0.373913	0.360656	Pole:ENSMUST00000112482.1, Pole:ENSMUST00000007296.11	Pole	NA	NA	FALSE	FALSE	0.99649	NA	FALSE
553	0.472604	0.754611	0.844022	0.837398	0.00662361	FALSE	0.0494668	2 vs 1	0.0132472	2 vs 1	0.688044	0.674797	Vps37a:ENSMUST00000238339.1, Vps37a:ENSMUST00000098817.3	Vps37a	0.561198	0.803295	FALSE	FALSE	0.754611	0.847201	FALSE
554	0.851643	0.827747	0.915094	0.908745	0.00634909	TRUE	0.0790767	2 vs 1	0.0126982	2 vs 1	0.830189	0.81749	Pik3r4:ENSMUST00000188784.1, Pik3r4:ENSMUST00000065778.12	Pik3r4	NA	NA	FALSE	FALSE	0.851643	NA	FALSE
555	0.843254	0.0870087	0.1921	0.185915	0.00618407	TRUE	0.0403469	1 vs 2	0.0123681	1 vs 2	-0.615801	-0.628169	Zfp74:ENSMUST00000108212.7, Zfp74:ENSMUST00000108205.8	Zfp74	NA	NA	FALSE	FALSE	0.843254	NA	FALSE
556	0.773843	NA	0.870673	0.864564	0.00610876	TRUE	0.0531941	1 vs 2	0.0122175	1 vs 2	0.741346	0.729128	Tmem87a:ENSMUST00000090042.11, Tmem87a:ENSMUST00000110729.1	Tmem87a	NA	NA	FALSE	FALSE	0.773843	NA	FALSE
557	0.488964	0.558091	0.92413	0.918285	0.00584473	FALSE	0.0805577	2 vs 1	0.0116895	2 vs 1	0.84826	0.836571	Htatsf1:ENSMUST00000114751.8, Htatsf1:ENSMUST00000088652.5	Htatsf1	0.577293	0.621212	FALSE	FALSE	0.558091	0.671912	FALSE
558	0.962207	0.69718	0.422513	0.418947	0.00356572	TRUE	0.041026	3 vs 2	0.0114191	3 vs 2	-0.169634	-0.181053	Adamts10:ENSMUST00000234715.1, Adamts10:ENSMUST00000234497.1, Adamts10:ENSMUST00000087623.12	Adamts10	NA	NA	FALSE	FALSE	0.962207	NA	FALSE
559	1.10496e-14	5.90688e-15	0.981837	0.976174	0.00566295	FALSE	0.27717	2 vs 1	0.0113259	2 vs 1	0.963674	0.952348	Fth1:ENSMUST00000237465.1, Fth1:ENSMUST00000025563.7	Fth1	4.54399e-14	2.68025e-14	FALSE	FALSE	1.10496e-14	5.05518e-14	FALSE
560	0.592213	NA	0.0214286	0.0158598	0.00556881	TRUE	0.306614	2 vs 1	0.0111376	2 vs 1	-0.957143	-0.96828	H2bc22:ENSMUST00000102982.1, H2bc22:ENSMUST00000110473.2	H2bc22	NA	NA	FALSE	FALSE	0.592213	NA	FALSE
561	1	NA	0.862661	0.857143	0.00551809	TRUE	0.0458095	2 vs 1	0.0110362	2 vs 1	0.725322	0.714286	Lifr:ENSMUST00000227727.1, Lifr:ENSMUST00000171588.1	Lifr	NA	NA	FALSE	FALSE	1	NA	FALSE
562	0.00152566	0.0453068	0.900778	0.895367	0.00541118	FALSE	0.0591262	2 vs 1	0.0108224	2 vs 1	0.801556	0.790733	Emd:ENSMUST00000002029.12, Emd:ENSMUST00000088313.4	Emd	0.00317268	0.0717191	FALSE	FALSE	0.0453068	0.0755987	FALSE
563	0.000130596	0.000473276	0.984446	0.979138	0.0053079	FALSE	0.299006	1 vs 2	0.0106158	1 vs 2	0.968891	0.958275	Csnk1e:ENSMUST00000117786.7, Csnk1e:ENSMUST00000122044.7	Csnk1e	0.000306397	0.0010805	FALSE	FALSE	0.000473276	0.0011248	FALSE
564	0.795563	0.230699	0.857554	0.852252	0.0053017	TRUE	0.0427447	2 vs 1	0.0106034	2 vs 1	0.715108	0.704505	Agap3:ENSMUST00000199856.1, Agap3:ENSMUST00000024123.8	Agap3	NA	NA	FALSE	FALSE	0.795563	NA	FALSE
565	0.494846	0.883713	0.928141	0.923522	0.00461841	FALSE	0.0672775	2 vs 1	0.00923682	2 vs 1	0.856281	0.847044	Stx5a:ENSMUST00000176570.1, Stx5a:ENSMUST00000176381.7	Stx5a	0.582359	0.913925	FALSE	FALSE	0.883713	0.958052	FALSE
566	1	0.951103	0.943538	0.93913	0.00440728	TRUE	0.0798424	2 vs 1	0.00881456	2 vs 1	0.887075	0.878261	B3gat2:ENSMUST00000144602.1, B3gat2:ENSMUST00000063663.5	B3gat2	NA	NA	FALSE	FALSE	1	NA	FALSE
567	0.695321	0.516468	0.764586	0.760271	0.00431564	FALSE	0.0238265	1 vs 2	0.00863127	1 vs 2	0.529173	0.520541	Marchf2:ENSMUST00000173015.7, Marchf2:ENSMUST00000173329.7	Marchf2	0.773518	0.582229	FALSE	FALSE	0.695321	0.80534	FALSE
568	0.789991	0.334687	0.933271	0.92915	0.00412123	TRUE	0.0643543	1 vs 2	0.00824246	1 vs 2	0.866542	0.8583	Camkk2:ENSMUST00000200109.4, Camkk2:ENSMUST00000196742.1	Camkk2	NA	NA	FALSE	FALSE	0.789991	NA	FALSE
569	0.828994	0.165864	0.936118	0.932231	0.00388653	TRUE	0.0632207	2 vs 1	0.00777306	2 vs 1	0.872236	0.864463	Mrpl1:ENSMUST00000121477.1, Mrpl1:ENSMUST00000117766.7	Mrpl1	NA	NA	FALSE	FALSE	0.828994	NA	FALSE
570	0.262838	0.366761	0.0309278	0.0271212	0.00380666	FALSE	0.135262	1 vs 2	0.00761332	1 vs 2	-0.938144	-0.945758	Sh3glb1:ENSMUST00000199531.4, Sh3glb1:ENSMUST00000198254.4	Sh3glb1	0.342344	0.440842	FALSE	FALSE	0.366761	0.470999	FALSE
571	0.530853	0.143931	0.963249	0.959691	0.00355809	FALSE	0.0961119	1 vs 2	0.00711618	1 vs 2	0.926498	0.919382	Itgb1bp1:ENSMUST00000076260.11, Itgb1bp1:ENSMUST00000172834.1	Itgb1bp1	0.614848	0.195682	FALSE	FALSE	0.530853	0.643351	FALSE
572	0.0393547	1.53682e-05	0.975833	0.972725	0.00310818	FALSE	0.12418	2 vs 1	0.00621635	2 vs 1	0.951666	0.94545	Tcp1:ENSMUST00000233286.1, Tcp1:ENSMUST00000151287.7	Tcp1	0.0620854	4.07201e-05	FALSE	FALSE	0.0393547	0.0673076	FALSE
573	0.939463	0.637065	0.539164	0.536232	0.00293261	TRUE	0.0117975	2 vs 1	0.00586521	2 vs 1	0.078329	0.0724638	Dcp2:ENSMUST00000202306.1, Dcp2:ENSMUST00000025350.9	Dcp2	NA	NA	FALSE	FALSE	0.939463	NA	FALSE
574	0.830344	0.221051	0.940316	0.937422	0.00289443	FALSE	0.0504397	1 vs 2	0.00578886	1 vs 2	0.880632	0.874844	Stam2:ENSMUST00000102759.7, Stam2:ENSMUST00000127316.7	Stam2	0.899129	0.280564	FALSE	FALSE	0.830344	0.915379	FALSE
575	0.571332	0.165328	0.0349381	0.0320544	0.00288371	FALSE	0.0891273	1 vs 2	0.00576741	1 vs 2	-0.930124	-0.935891	Xpa:ENSMUST00000058232.10, Xpa:ENSMUST00000030013.11	Xpa	0.659645	0.219805	FALSE	FALSE	0.571332	0.685598	FALSE
576	1	NA	0.16	0.157143	0.00285714	TRUE	0.0214141	2 vs 1	0.00571429	2 vs 1	-0.68	-0.685714	Map3k20:ENSMUST00000135469.7, Map3k20:ENSMUST00000090824.11	Map3k20	NA	NA	FALSE	FALSE	1	NA	FALSE
577	1	0.839063	0.170418	0.167742	0.00267607	TRUE	0.0190482	1 vs 2	0.00535214	1 vs 2	-0.659164	-0.664516	Lmna:ENSMUST00000029699.12, Lmna:ENSMUST00000120377.7	Lmna	NA	NA	FALSE	FALSE	1	NA	FALSE
578	0.714809	0.00776064	0.929833	0.927163	0.00266953	FALSE	0.0402143	2 vs 1	0.00533905	2 vs 1	0.859665	0.854326	Pmpca:ENSMUST00000114093.1, Pmpca:ENSMUST00000076431.12	Pmpca	0.788012	0.0148269	FALSE	FALSE	0.714809	0.815016	FALSE
579	0.985914	0.382387	0.289875	0.287234	0.00264113	TRUE	0.0128654	2 vs 1	0.00528226	2 vs 1	-0.42025	-0.425532	Atxn7l1:ENSMUST00000077456.12, Atxn7l1:ENSMUST00000144586.1	Atxn7l1	NA	NA	FALSE	FALSE	0.985914	NA	FALSE
580	0.985143	0.990367	0.637559	0.63496	0.00259884	FALSE	0.0135918	1 vs 2	0.00519769	1 vs 3	0.275118	0.26992	Zfp950:ENSMUST00000205854.1, Zfp950:ENSMUST00000180544.2, Zfp950:ENSMUST00000143264.7	Zfp950	1	0.990367	FALSE	FALSE	0.990367	1	FALSE
581	0.85703	0.414342	0.214044	0.211446	0.00259843	FALSE	0.0155146	1 vs 2	0.00519686	1 vs 2	-0.571912	-0.577108	Myef2:ENSMUST00000152367.7, Myef2:ENSMUST00000142718.7	Myef2	0.919862	0.4887	FALSE	FALSE	0.85703	0.939141	FALSE
582	0.972607	0.912988	0.305455	0.302872	0.00258248	TRUE	0.0122018	1 vs 2	0.00516497	1 vs 2	-0.389091	-0.394256	Marf1:ENSMUST00000090300.5, Marf1:ENSMUST00000229614.1	Marf1	NA	NA	FALSE	FALSE	0.972607	NA	FALSE
583	0.818334	0.968336	0.6982	0.695621	0.00257922	FALSE	0.0122108	1 vs 2	0.00515844	1 vs 2	0.3964	0.391241	Ppil3:ENSMUST00000117069.7, Ppil3:ENSMUST00000114345.8	Ppil3	0.888754	0.981823	FALSE	FALSE	0.968336	1	FALSE
584	0.932815	0.88755	0.951636	0.949126	0.00251025	TRUE	0.0532423	1 vs 2	0.0050205	1 vs 2	0.903272	0.898251	Stxbp4:ENSMUST00000143203.7, Stxbp4:ENSMUST00000107875.7	Stxbp4	NA	NA	FALSE	FALSE	0.932815	NA	FALSE
585	1	NA	0.937984	0.935484	0.00250063	TRUE	0.0422004	1 vs 2	0.00500125	1 vs 2	0.875969	0.870968	Prdm11:ENSMUST00000238863.1, Prdm11:ENSMUST00000111272.2	Prdm11	NA	NA	FALSE	FALSE	1	NA	FALSE
586	1	NA	0.985507	0.983051	0.0024564	TRUE	0.159065	1 vs 2	0.0049128	1 vs 2	0.971014	0.966102	Csf1:ENSMUST00000118593.7, Csf1:ENSMUST00000120243.7	Csf1	NA	NA	FALSE	FALSE	1	NA	FALSE
587	1	0.999546	0.835681	0.833333	0.00234742	TRUE	0.0169976	2 vs 1	0.00469484	2 vs 1	0.671362	0.666667	Spink10:ENSMUST00000162365.7, Spink10:ENSMUST00000055725.11	Spink10	NA	NA	FALSE	FALSE	1	NA	FALSE
588	1	0.700963	0.258303	0.256055	0.00224722	TRUE	0.0117633	2 vs 1	0.00449444	2 vs 1	-0.483395	-0.487889	Cntln:ENSMUST00000102819.9, Cntln:ENSMUST00000047023.12	Cntln	NA	NA	FALSE	FALSE	1	NA	FALSE
589	0.370838	0.666974	0.68212	0.680008	0.00211166	FALSE	0.00972151	1 vs 2	0.00422332	1 vs 2	0.364239	0.360016	Nme1:ENSMUST00000135884.7, Nme1:ENSMUST00000107844.2	Nme1	0.453936	0.724885	FALSE	FALSE	0.666974	0.777428	FALSE
590	0.887376	0.559604	0.764868	0.76292	0.00194857	FALSE	0.0108038	2 vs 1	0.00389715	2 vs 1	0.529736	0.525839	Msl1:ENSMUST00000107485.7, Msl1:ENSMUST00000037915.8	Msl1	0.944127	0.621212	FALSE	FALSE	0.887376	0.958052	FALSE
591	0.628022	0.886315	0.513879	0.51222	0.00165902	FALSE	0.00664062	1 vs 2	0.00331805	1 vs 2	0.0277574	0.0244393	Selenoh:ENSMUST00000117299.8, Selenoh:ENSMUST00000189988.1	Selenoh	0.707249	0.914012	FALSE	FALSE	0.886315	0.958052	FALSE
592	1	NA	0.928144	0.926606	0.00153821	TRUE	0.0228395	2 vs 1	0.00307642	2 vs 1	0.856287	0.853211	Kctd9:ENSMUST00000152243.7, Kctd9:ENSMUST00000078053.12	Kctd9	NA	NA	FALSE	FALSE	1	NA	FALSE
593	1	NA	0.955317	0.953846	0.00147109	TRUE	0.0339338	1 vs 2	0.00294219	1 vs 2	0.910634	0.907692	Mical3:ENSMUST00000207889.1, Mical3:ENSMUST00000077159.7	Mical3	NA	NA	FALSE	FALSE	1	NA	FALSE
594	1	0.440026	0.916832	0.915493	0.00133873	TRUE	0.0174296	2 vs 1	0.00267745	2 vs 1	0.833663	0.830986	Trib1:ENSMUST00000118228.1, Trib1:ENSMUST00000067543.7	Trib1	NA	NA	FALSE	FALSE	1	NA	FALSE
595	0.934612	0.898401	0.117855	0.116582	0.00127273	FALSE	0.0122996	2 vs 1	0.00254546	2 vs 1	-0.76429	-0.766836	Gm6710:ENSMUST00000109011.7, Gm6710:ENSMUST00000109012.3	Gm6710	0.974367	0.923851	FALSE	FALSE	0.934612	0.988407	FALSE
596	1	NA	0.910714	0.909574	0.00113982	TRUE	0.0139375	2 vs 1	0.00227964	2 vs 1	0.821429	0.819149	Lpar2:ENSMUST00000238452.1, Lpar2:ENSMUST00000034325.5	Lpar2	NA	NA	FALSE	FALSE	1	NA	FALSE
597	0.270018	0.461634	0.0445545	0.0434683	0.00108621	FALSE	0.0258176	1 vs 2	0.00217242	1 vs 2	-0.910891	-0.913063	Rps28:ENSMUST00000087342.12, Rps28:ENSMUST00000173019.7	Rps28	0.350449	0.531979	FALSE	FALSE	0.461634	0.574688	FALSE
598	1	0.925174	0.925311	0.924386	0.00092557	FALSE	0.013317	2 vs 1	0.00185114	2 vs 1	0.850622	0.848771	Msl2:ENSMUST00000189616.1, Msl2:ENSMUST00000085177.4	Msl2	1	0.948696	FALSE	FALSE	1	1	FALSE
599	0.881616	0.852106	0.0529572	0.05208	0.000877208	FALSE	0.017629	1 vs 2	0.00175442	1 vs 2	-0.894086	-0.89584	Gm14434:ENSMUST00000122097.8, Gm14434:ENSMUST00000120959.7	Gm14434	0.9416	0.886288	FALSE	FALSE	0.881616	0.958052	FALSE
600	1	0.516277	0.95894	0.958084	0.000856565	FALSE	0.0215405	2 vs 1	0.00171313	2 vs 1	0.917881	0.916168	Tlk2:ENSMUST00000145048.7, Tlk2:ENSMUST00000106939.8	Tlk2	1	0.582229	FALSE	FALSE	1	1	FALSE
601	0.896753	0.872174	0.0523613	0.0515695	0.000791795	FALSE	0.0160725	1 vs 2	0.00158359	1 vs 2	-0.895277	-0.896861	Gm4724:ENSMUST00000109046.9, Gm4724:ENSMUST00000152941.1	Gm4724	0.951338	0.904569	FALSE	FALSE	0.896753	0.965328	FALSE
602	1	NA	0.976489	0.975791	0.000697594	FALSE	0.029954	2 vs 1	0.00139519	2 vs 1	0.952978	0.951583	Apc:ENSMUST00000066133.6, Apc:ENSMUST00000079362.12	Apc	1	NA	FALSE	FALSE	1	1	FALSE
603	0.921707	0.77242	0.0535013	0.0528494	0.000651913	FALSE	0.0129484	1 vs 2	0.00130383	1 vs 2	-0.892997	-0.894301	Gm14308:ENSMUST00000108990.8, Gm14308:ENSMUST00000119149.7	Gm14308	0.968578	0.815083	FALSE	FALSE	0.921707	0.985521	FALSE
604	0.95957	0.482314	0.0463127	0.0456961	0.000616616	FALSE	0.01405	2 vs 1	0.00123323	2 vs 1	-0.907375	-0.908608	Gm14305:ENSMUST00000108980.8, Gm14305:ENSMUST00000108981.8	Gm14305	0.994909	0.552303	FALSE	FALSE	0.95957	1	FALSE
605	1	0.999707	0.51498	0.514507	0.000473445	TRUE	0.00189543	1 vs 2	0.00094689	1 vs 2	0.0299604	0.0290135	Zup1:ENSMUST00000218055.1, Zup1:ENSMUST00000048222.5	Zup1	NA	NA	FALSE	FALSE	1	NA	FALSE
606	1	0.772125	0.955711	0.955263	0.000447798	TRUE	0.0105287	2 vs 1	0.000895596	2 vs 1	0.911422	0.910526	Shprh:ENSMUST00000054814.13, Shprh:ENSMUST00000044053.12	Shprh	NA	NA	FALSE	FALSE	1	NA	FALSE
607	0.153546	0.193026	0.998782	0.998462	0.00031954	FALSE	0.233235	2 vs 1	0.000639079	2 vs 1	0.997563	0.996924	Hint1:ENSMUST00000117710.1, Hint1:ENSMUST00000020504.5	Hint1	0.211271	0.24847	FALSE	FALSE	0.193026	0.269648	FALSE
608	0.991497	0.971004	0.922469	0.922175	0.000293606	FALSE	0.00409812	2 vs 1	0.000587212	2 vs 1	0.844938	0.84435	Tmem128:ENSMUST00000119047.7, Tmem128:ENSMUST00000087511.9	Tmem128	1	0.981823	FALSE	FALSE	0.991497	1	FALSE
609	0.999043	0.00307195	0.338439	0.338243	0.0001956	FALSE	0.000873736	1 vs 2	0.0003912	1 vs 2	-0.323123	-0.323514	Elf2:ENSMUST00000194641.5, Elf2:ENSMUST00000195432.1	Elf2	1	0.0062297	FALSE	FALSE	0.999043	1	FALSE
610	1	NA	0.75	0.75	0	TRUE	0	1 vs 2	0	1 vs 2	0.5	0.5	Susd3:ENSMUST00000058196.12, Susd3:ENSMUST00000119721.1	Susd3	NA	NA	FALSE	FALSE	1	NA	FALSE
611	1	0.414654	0.972044	0.972112	-6.75575e-05	FALSE	-0.00248899	1 vs 2	-0.000135115	1 vs 2	0.944088	0.944223	Hmgcr:ENSMUST00000022176.14, Hmgcr:ENSMUST00000170287.7	Hmgcr	1	0.4887	FALSE	FALSE	1	1	FALSE
612	1	0.666346	0.0788177	0.0789474	-0.000129634	TRUE	-0.00178412	2 vs 1	-0.000259269	2 vs 1	-0.842365	-0.842105	Zic3:ENSMUST00000088627.10, Zic3:ENSMUST00000088629.3	Zic3	NA	NA	FALSE	FALSE	1	NA	FALSE
613	1	0.698047	0.792185	0.792339	-0.000153985	TRUE	-0.000935606	2 vs 1	-0.00030797	2 vs 1	0.584369	0.584677	Pds5b:ENSMUST00000110486.1, Pds5b:ENSMUST00000016569.10	Pds5b	NA	NA	FALSE	FALSE	1	NA	FALSE
614	1	0.0742793	0.908559	0.908727	-0.000167868	FALSE	-0.00202225	1 vs 2	-0.000335737	1 vs 2	0.817118	0.817454	Srpk1:ENSMUST00000130643.8, Srpk1:ENSMUST00000114767.2	Srpk1	1	0.110506	FALSE	FALSE	1	1	FALSE
615	1	NA	0.00432277	0.0045045	-0.000181738	TRUE	-0.0413648	1 vs 2	-0.000363476	1 vs 2	-0.991354	-0.990991	Fam126a:ENSMUST00000101513.8, Fam126a:ENSMUST00000030849.12	Fam126a	NA	NA	FALSE	FALSE	1	NA	FALSE
616	1	0.0126369	0.817109	0.817313	-0.000203998	FALSE	-0.00136565	2 vs 1	-0.000407996	2 vs 1	0.634217	0.634625	4933434E20Rik:ENSMUST00000029552.12, 4933434E20Rik:ENSMUST00000160640.7	4933434E20Rik	1	0.0228219	FALSE	FALSE	1	1	FALSE
617	1	0.973883	0.94721	0.947479	-0.000269339	FALSE	-0.00539941	2 vs 1	-0.000538677	2 vs 1	0.894419	0.894958	Rnf13:ENSMUST00000199041.1, Rnf13:ENSMUST00000200497.4	Rnf13	1	0.981999	FALSE	FALSE	1	1	FALSE
618	1	NA	0.973684	0.974026	-0.000341763	TRUE	-0.013423	2 vs 1	-0.000683527	2 vs 1	0.947368	0.948052	Nsl1:ENSMUST00000139340.7, Nsl1:ENSMUST00000078259.7	Nsl1	NA	NA	FALSE	FALSE	1	NA	FALSE
619	1	0.722646	0.635945	0.636364	-0.000418936	TRUE	-0.00180996	1 vs 2	-0.000837872	1 vs 2	0.271889	0.272727	Mast4:ENSMUST00000239261.1, Mast4:ENSMUST00000164111.1	Mast4	NA	NA	FALSE	FALSE	1	NA	FALSE
620	0.935905	0.0618281	0.448063	0.448552	-0.000488774	FALSE	-0.00197622	1 vs 2	-0.000977547	1 vs 2	-0.103874	-0.102897	Rbm39:ENSMUST00000109587.8, Rbm39:ENSMUST00000109584.7	Rbm39	0.974367	0.0939062	FALSE	FALSE	0.935905	0.988407	FALSE
621	0.995486	0.838208	0.944563	0.945303	-0.000739896	FALSE	-0.0142196	2 vs 1	-0.00147979	2 vs 1	0.889127	0.890606	Dst:ENSMUST00000182314.7, Dst:ENSMUST00000097785.9	Dst	1	0.876857	FALSE	FALSE	0.995486	1	FALSE
622	0.994052	0.775473	0.103589	0.10439	-0.000800966	FALSE	-0.00859632	2 vs 1	-0.00160193	2 vs 1	-0.792821	-0.79122	Cspp1:ENSMUST00000122156.7, Cspp1:ENSMUST00000071087.11	Cspp1	1	0.815933	FALSE	FALSE	0.994052	1	FALSE
623	0.844908	0.978554	0.655047	0.65623	-0.00118272	FALSE	-0.00523847	2 vs 1	-0.00236545	2 vs 1	0.310094	0.31246	Ssu72:ENSMUST00000105595.1, Ssu72:ENSMUST00000030905.8	Ssu72	0.909518	0.983976	FALSE	FALSE	0.978554	1	FALSE
624	0.977701	0.0371559	0.888792	0.889988	-0.00119605	FALSE	-0.012158	1 vs 2	-0.00239209	1 vs 2	0.777583	0.779975	2610008E11Rik:ENSMUST00000039271.6, 2610008E11Rik:ENSMUST00000220220.1	2610008E11Rik	1	0.0602125	FALSE	FALSE	0.977701	1	FALSE
625	1	0.99985	0.65873	0.66	-0.00126984	TRUE	-0.00565373	2 vs 1	-0.00253968	2 vs 1	0.31746	0.32	Gsto2:ENSMUST00000237514.1, Gsto2:ENSMUST00000120645.7	Gsto2	NA	NA	FALSE	FALSE	1	NA	FALSE
626	0.882429	0.771863	0.924245	0.925616	-0.00137035	FALSE	-0.0197365	2 vs 1	-0.0027407	2 vs 1	0.848491	0.851232	Coa8:ENSMUST00000162316.1, Coa8:ENSMUST00000040519.11	Coa8	0.9416	0.815083	FALSE	FALSE	0.882429	0.958052	FALSE
627	0.990304	0.735278	0.11399	0.115385	-0.00139498	TRUE	-0.0137392	1 vs 2	-0.00278996	1 vs 2	-0.772021	-0.769231	Zscan29:ENSMUST00000079024.11, Zscan29:ENSMUST00000146243.1	Zscan29	NA	NA	FALSE	FALSE	0.990304	NA	FALSE
628	1	0.99797	0.934761	0.93617	-0.00140877	TRUE	-0.0233367	2 vs 1	-0.00281754	2 vs 1	0.869523	0.87234	Kcnc3:ENSMUST00000209177.1, Kcnc3:ENSMUST00000207493.1	Kcnc3	NA	NA	FALSE	FALSE	1	NA	FALSE
629	0.974519	NA	0.0547417	0.056213	-0.00147131	TRUE	-0.0280801	2 vs 1	-0.00294261	2 vs 1	-0.890517	-0.887574	Ccnc:ENSMUST00000065928.10, Ccnc:ENSMUST00000120679.7	Ccnc	NA	NA	FALSE	FALSE	0.974519	NA	FALSE
630	0.920386	0.0381846	0.510436	0.512007	-0.0015712	FALSE	-0.00628796	2 vs 1	-0.00314239	2 vs 1	0.0208713	0.0240137	Chordc1:ENSMUST00000213605.1, Chordc1:ENSMUST00000001825.8	Chordc1	0.968578	0.0616045	FALSE	FALSE	0.920386	0.985521	FALSE
631	0.937096	0.203799	0.746279	0.74786	-0.00158168	FALSE	-0.00837062	1 vs 2	-0.00316336	1 vs 2	0.492558	0.495721	Zfp787:ENSMUST00000094870.2, Zfp787:ENSMUST00000207957.1	Zfp787	0.974367	0.260489	FALSE	FALSE	0.937096	0.988407	FALSE
632	0.987564	0.985612	0.832021	0.833622	-0.00160119	TRUE	-0.0115004	1 vs 2	-0.00320237	1 vs 2	0.664042	0.667244	Wasl:ENSMUST00000031695.14, Wasl:ENSMUST00000041737.7	Wasl	NA	NA	FALSE	FALSE	0.987564	NA	FALSE
633	0.979493	0.997413	0.457917	0.459574	-0.00165721	TRUE	-0.00667427	1 vs 2	-0.00331441	1 vs 2	-0.0841655	-0.0808511	Spata24:ENSMUST00000025209.11, Spata24:ENSMUST00000096573.3	Spata24	NA	NA	FALSE	FALSE	0.997413	NA	FALSE
634	0.816519	0.197741	0.926689	0.92871	-0.00202095	FALSE	-0.0301325	1 vs 2	-0.0040419	1 vs 2	0.853379	0.857421	Ndrg3:ENSMUST00000069600.12, Ndrg3:ENSMUST00000109558.1	Ndrg3	0.888754	0.25364	FALSE	FALSE	0.816519	0.902858	FALSE
635	0.624533	0.48782	0.0232558	0.0254345	-0.00217869	FALSE	-0.0917847	2 vs 1	-0.00435738	2 vs 1	-0.953488	-0.949131	Opa3:ENSMUST00000063976.8, Opa3:ENSMUST00000161711.1	Opa3	0.705491	0.555328	FALSE	FALSE	0.624533	0.734981	FALSE
636	0.912763	0.970491	0.725573	0.727891	-0.00231788	FALSE	-0.0116716	2 vs 1	-0.00463575	2 vs 1	0.451147	0.455782	Ldah:ENSMUST00000218086.1, Ldah:ENSMUST00000169104.2	Ldah	0.965524	0.981823	FALSE	FALSE	0.970491	1	FALSE
637	1	0.985361	0.660465	0.662791	-0.00232558	TRUE	-0.0103878	1 vs 2	-0.00465116	1 vs 2	0.32093	0.325581	Zkscan2:ENSMUST00000042470.13, Zkscan2:ENSMUST00000128217.1	Zkscan2	NA	NA	FALSE	FALSE	1	NA	FALSE
638	0.923589	0.422003	0.304086	0.306527	-0.00244065	FALSE	-0.0115074	2 vs 1	-0.0048813	2 vs 1	-0.391828	-0.386946	Gm14295:ENSMUST00000118012.8, Gm14295:ENSMUST00000132883.7	Gm14295	0.968578	0.492562	FALSE	FALSE	0.923589	0.985521	FALSE
639	0.815479	0.632002	0.903609	0.906074	-0.00246539	FALSE	-0.0286342	2 vs 1	-0.00493077	2 vs 1	0.807217	0.812148	Crk:ENSMUST00000093115.3, Crk:ENSMUST00000108425.7	Crk	0.888754	0.691015	FALSE	FALSE	0.815479	0.902858	FALSE
640	1	NA	0.92381	0.926829	-0.00301974	TRUE	-0.0437044	1 vs 2	-0.00603949	1 vs 2	0.847619	0.853659	Slc2a4:ENSMUST00000018710.12, Slc2a4:ENSMUST00000141837.8	Slc2a4	NA	NA	FALSE	FALSE	1	NA	FALSE
641	1	NA	0.957303	0.960396	-0.00309267	TRUE	-0.0784163	2 vs 1	-0.00618534	2 vs 1	0.914607	0.920792	Zcchc4:ENSMUST00000031077.12, Zcchc4:ENSMUST00000113904.8	Zcchc4	NA	NA	FALSE	FALSE	1	NA	FALSE
642	0.912957	NA	0.941298	0.944444	-0.00314681	TRUE	-0.058434	1 vs 2	-0.00629363	1 vs 2	0.882595	0.888889	Cdc27:ENSMUST00000093923.8, Cdc27:ENSMUST00000106961.1	Cdc27	NA	NA	FALSE	FALSE	0.912957	NA	FALSE
643	0.918	0.723125	0.327978	0.331137	-0.00315909	TRUE	-0.0142979	1 vs 2	-0.00631818	1 vs 2	-0.344045	-0.337727	Arrdc4:ENSMUST00000048068.14, Arrdc4:ENSMUST00000118110.2	Arrdc4	NA	NA	FALSE	FALSE	0.918	NA	FALSE
644	0.98081	0.775484	0.317308	0.320611	-0.00330299	TRUE	-0.0152056	1 vs 2	-0.00660599	1 vs 2	-0.365385	-0.358779	Gm14418:ENSMUST00000128657.7, Gm14418:ENSMUST00000108955.1	Gm14418	NA	NA	FALSE	FALSE	0.98081	NA	FALSE
645	0.290441	0.180986	0.0390733	0.0425343	-0.00346105	FALSE	-0.0884808	1 vs 2	-0.00692209	1 vs 2	-0.921853	-0.914931	Pbx1:ENSMUST00000188912.6, Pbx1:ENSMUST00000176540.7	Pbx1	0.370389	0.238036	FALSE	FALSE	0.290441	0.39371	FALSE
646	0.83366	0.970864	0.647137	0.650805	-0.00366812	FALSE	-0.0161019	2 vs 1	-0.00733624	2 vs 1	0.294274	0.301611	Yars2:ENSMUST00000159962.7, Yars2:ENSMUST00000059955.14	Yars2	0.900058	0.981823	FALSE	FALSE	0.970864	1	FALSE
647	0.945097	NA	0.950397	0.954098	-0.00370154	TRUE	-0.0814412	2 vs 1	-0.00740307	2 vs 1	0.900794	0.908197	1600014C10Rik:ENSMUST00000177983.1, 1600014C10Rik:ENSMUST00000178207.7	1600014C10Rik	NA	NA	FALSE	FALSE	0.945097	NA	FALSE
648	0.700986	0.0115686	0.955337	0.959243	-0.00390574	FALSE	-0.0955922	1 vs 2	-0.00781148	1 vs 2	0.910675	0.918486	Alcam:ENSMUST00000023312.13, Alcam:ENSMUST00000168071.1	Alcam	0.777457	0.0211025	FALSE	FALSE	0.700986	0.805557	FALSE
649	0.833673	0.897646	0.958201	0.962121	-0.00391982	TRUE	-0.102554	1 vs 2	-0.00783964	1 vs 2	0.916403	0.924242	Rnf141:ENSMUST00000177236.7, Rnf141:ENSMUST00000176716.2	Rnf141	NA	NA	FALSE	FALSE	0.897646	NA	FALSE
650	0.529481	0.488016	0.973208	0.977473	-0.00426476	FALSE	-0.177753	1 vs 2	-0.00852952	1 vs 2	0.946417	0.954946	Pde7a:ENSMUST00000099195.9, Pde7a:ENSMUST00000121951.1	Pde7a	0.614848	0.555328	FALSE	FALSE	0.529481	0.643351	FALSE
651	0.00010872	0.00247	0.0410273	0.0453212	-0.00429387	FALSE	-0.104024	1 vs 2	-0.00858775	1 vs 2	-0.917945	-0.909358	Hnrnpa2b1:ENSMUST00000069949.12, Hnrnpa2b1:ENSMUST00000204188.2	Hnrnpa2b1	0.000258386	0.00506559	FALSE	FALSE	0.00247	0.00531776	FALSE
652	0.85934	0.975228	0.702588	0.706941	-0.00435239	TRUE	-0.0209181	1 vs 2	-0.00870478	1 vs 2	0.405177	0.413882	Gatad1:ENSMUST00000007559.14, Gatad1:ENSMUST00000119783.1	Gatad1	NA	NA	FALSE	FALSE	0.975228	NA	FALSE
653	0.874425	0.789928	0.652198	0.656814	-0.00461665	TRUE	-0.0204163	1 vs 2	-0.0092333	1 vs 2	0.304396	0.313629	Ptpn4:ENSMUST00000064091.11, Ptpn4:ENSMUST00000163621.1	Ptpn4	NA	NA	FALSE	FALSE	0.874425	NA	FALSE
654	1	NA	0.928571	0.933333	-0.0047619	TRUE	-0.074108	1 vs 2	-0.00952381	1 vs 2	0.857143	0.866667	Ipcef1:ENSMUST00000105617.7, Ipcef1:ENSMUST00000170680.7	Ipcef1	NA	NA	FALSE	FALSE	1	NA	FALSE
655	0.511577	0.282464	0.550006	0.555016	-0.0050103	FALSE	-0.0202649	2 vs 1	-0.0100206	2 vs 1	0.100012	0.110033	Olfm1:ENSMUST00000102879.3, Olfm1:ENSMUST00000100244.9	Olfm1	0.596296	0.351145	FALSE	FALSE	0.511577	0.626211	FALSE
656	0.640904	0.93677	0.83503	0.84009	-0.00506026	FALSE	-0.0371957	1 vs 2	-0.0101205	1 vs 2	0.67006	0.68018	Nrbf2:ENSMUST00000077839.12, Nrbf2:ENSMUST00000159002.1	Nrbf2	0.717342	0.957881	FALSE	FALSE	0.93677	0.988407	FALSE
657	0.841425	0.883367	0.835355	0.840449	-0.00509479	TRUE	-0.0375133	2 vs 1	-0.0101896	2 vs 1	0.670709	0.680899	Gmip:ENSMUST00000123453.1, Gmip:ENSMUST00000036074.14	Gmip	NA	NA	FALSE	FALSE	0.883367	NA	FALSE
658	1	NA	0.880503	0.885714	-0.00521114	TRUE	-0.0504894	2 vs 1	-0.0104223	2 vs 1	0.761006	0.771429	Pde4b:ENSMUST00000172616.1, Pde4b:ENSMUST00000106908.8	Pde4b	NA	NA	FALSE	FALSE	1	NA	FALSE
659	0.676228	0.778477	0.982648	0.987915	-0.00526701	TRUE	-0.367099	2 vs 1	-0.010534	2 vs 1	0.965297	0.975831	Ipmk:ENSMUST00000118381.7, Ipmk:ENSMUST00000079252.12	Ipmk	NA	NA	FALSE	FALSE	0.778477	NA	FALSE
660	0.621203	0.748784	0.931677	0.937016	-0.00533849	FALSE	-0.0870712	2 vs 1	-0.010677	2 vs 1	0.863354	0.874031	Supt20:ENSMUST00000170552.5, Supt20:ENSMUST00000200441.4	Supt20	0.703902	0.799437	FALSE	FALSE	0.748784	0.845848	FALSE
661	0.840608	0.515092	0.953571	0.959091	-0.00551948	TRUE	-0.132334	1 vs 2	-0.011039	1 vs 2	0.907143	0.918182	Gpd1l:ENSMUST00000146623.7, Gpd1l:ENSMUST00000084853.3	Gpd1l	NA	NA	FALSE	FALSE	0.840608	NA	FALSE
662	1	NA	0.0638298	0.0694444	-0.00561466	TRUE	-0.0903226	1 vs 2	-0.0112293	1 vs 2	-0.87234	-0.861111	Filip1:ENSMUST00000239133.1, Filip1:ENSMUST00000093811.10	Filip1	NA	NA	FALSE	FALSE	1	NA	FALSE
663	0.811222	0.521167	0.833166	0.839024	-0.00585856	TRUE	-0.0427545	2 vs 1	-0.0117171	2 vs 1	0.666332	0.678049	Zfp930:ENSMUST00000212312.1, Zfp930:ENSMUST00000212681.1	Zfp930	NA	NA	FALSE	FALSE	0.811222	NA	FALSE
664	0.75124	0.352667	0.724874	0.730734	-0.00585915	FALSE	-0.0295768	1 vs 2	-0.0117183	1 vs 2	0.449749	0.461467	Fgd4:ENSMUST00000161861.7, Fgd4:ENSMUST00000161188.8	Fgd4	0.825687	0.425309	FALSE	FALSE	0.75124	0.846012	FALSE
665	0.0775115	0.205717	0.758186	0.764365	-0.0061787	FALSE	-0.0339999	1 vs 2	-0.0123574	1 vs 2	0.516373	0.52873	Pafah1b3:ENSMUST00000108410.7, Pafah1b3:ENSMUST00000155118.1	Pafah1b3	0.114392	0.262018	FALSE	FALSE	0.205717	0.286283	FALSE
666	0.686814	NA	0.966312	0.972727	-0.00641522	TRUE	-0.21787	2 vs 1	-0.0128304	2 vs 1	0.932624	0.945455	Tmem175:ENSMUST00000146207.5, Tmem175:ENSMUST00000063272.12	Tmem175	NA	NA	FALSE	FALSE	0.686814	NA	FALSE
667	1	NA	0.937888	0.944444	-0.00655625	TRUE	-0.118519	2 vs 1	-0.0131125	2 vs 1	0.875776	0.888889	Ppm1h:ENSMUST00000161487.7, Ppm1h:ENSMUST00000067918.11	Ppm1h	NA	NA	FALSE	FALSE	1	NA	FALSE
668	1	NA	0.863636	0.870588	-0.00695187	TRUE	-0.0603431	2 vs 1	-0.0139037	2 vs 1	0.727273	0.741176	Fut10:ENSMUST00000161788.7, Fut10:ENSMUST00000110527.8	Fut10	NA	NA	FALSE	FALSE	1	NA	FALSE
669	0.401121	0.691372	0.671987	0.679069	-0.00708174	FALSE	-0.0323096	2 vs 1	-0.0141635	2 vs 1	0.343974	0.358137	Ube3a:ENSMUST00000202945.3, Ube3a:ENSMUST00000200758.3	Ube3a	0.484523	0.749158	FALSE	FALSE	0.691372	0.803308	FALSE
670	0.992567	0.990782	0.286385	0.293478	-0.00709328	TRUE	-0.0344563	2 vs 1	-0.0141866	2 vs 1	-0.42723	-0.413043	Spata33:ENSMUST00000212760.1, Spata33:ENSMUST00000212523.1	Spata33	NA	NA	FALSE	FALSE	0.992567	NA	FALSE
671	1	NA	0.937037	0.944444	-0.00740741	TRUE	-0.133037	2 vs 1	-0.0148148	2 vs 1	0.874074	0.888889	Kcnmb2:ENSMUST00000194796.1, Kcnmb2:ENSMUST00000119970.7	Kcnmb2	NA	NA	FALSE	FALSE	1	NA	FALSE
672	0.31573	0.000666502	0.293684	0.301187	-0.00750394	FALSE	-0.035911	2 vs 1	-0.0150079	2 vs 1	-0.412633	-0.397625	Srsf10:ENSMUST00000105853.9, Srsf10:ENSMUST00000126641.1	Srsf10	0.395744	0.00150273	FALSE	FALSE	0.31573	0.420208	FALSE
673	0.73197	0.586404	0.428883	0.436416	-0.00753305	TRUE	-0.0306897	1 vs 2	-0.0150661	1 vs 2	-0.142234	-0.127168	Rabgap1l:ENSMUST00000028052.11, Rabgap1l:ENSMUST00000028049.12	Rabgap1l	NA	NA	FALSE	FALSE	0.73197	NA	FALSE
674	0.704512	0.527136	0.76659	0.77415	-0.00756015	FALSE	-0.0427399	1 vs 2	-0.0151203	1 vs 2	0.533179	0.548299	Ube4a:ENSMUST00000117506.8, Ube4a:ENSMUST00000138559.8	Ube4a	0.779008	0.590587	FALSE	FALSE	0.704512	0.805786	FALSE
675	0.432137	0.420879	0.947668	0.955314	-0.00764621	FALSE	-0.165988	2 vs 1	-0.0152924	2 vs 1	0.895336	0.910628	Pcgf3:ENSMUST00000112597.7, Pcgf3:ENSMUST00000046975.11	Pcgf3	0.52027	0.492562	FALSE	FALSE	0.432137	0.543512	FALSE
676	0.118833	0.182932	0.979632	0.987319	-0.00768634	FALSE	-0.481639	1 vs 2	-0.0153727	1 vs 2	0.959265	0.974638	Pogk:ENSMUST00000131487.7, Pogk:ENSMUST00000127596.2	Pogk	0.167873	0.239727	FALSE	FALSE	0.182932	0.259509	FALSE
677	0.982671	NA	0.73822	0.746269	-0.00804876	TRUE	-0.057432	2 vs 1	-0.0160975	3 vs 1	0.47644	0.492537	Lrba:ENSMUST00000192145.5, Lrba:ENSMUST00000194759.5, Lrba:ENSMUST00000195524.1	Lrba	NA	NA	FALSE	FALSE	0.982671	NA	FALSE
678	0.0971459	0.101972	0.940857	0.948966	-0.00810942	FALSE	-0.156055	2 vs 1	-0.0162188	2 vs 1	0.881713	0.897932	Ypel1:ENSMUST00000232574.1, Ypel1:ENSMUST00000035682.15	Ypel1	0.139982	0.144593	FALSE	FALSE	0.101972	0.155508	FALSE
679	0.759025	0.383278	0.688646	0.696935	-0.00828918	FALSE	-0.0790736	2 vs 1	-0.0165784	3 vs 1	0.377291	0.39387	Son:ENSMUST00000114036.8, Son:ENSMUST00000119368.7, Son:ENSMUST00000122302.7	Son	0.831746	0.457665	FALSE	FALSE	0.759025	0.849551	FALSE
680	0.0262312	0.010495	0.979707	0.988083	-0.00837602	FALSE	-0.540821	2 vs 1	-0.016752	2 vs 1	0.959414	0.976166	Ercc1:ENSMUST00000160369.7, Ercc1:ENSMUST00000003645.8	Ercc1	0.0440395	0.0193386	FALSE	FALSE	0.0262312	0.0472937	FALSE
681	0.503001	0.110104	0.741269	0.750279	-0.00900997	FALSE	-0.0475261	2 vs 1	-0.0180199	2 vs 1	0.482539	0.500559	Zfp606:ENSMUST00000123589.7, Zfp606:ENSMUST00000098822.9	Zfp606	0.588174	0.153722	FALSE	FALSE	0.503001	0.61778	FALSE
682	0.698358	NA	0.0219966	0.03125	-0.00925338	TRUE	-0.360637	1 vs 2	-0.0185068	1 vs 2	-0.956007	-0.9375	Saxo2:ENSMUST00000207693.1, Saxo2:ENSMUST00000126478.1	Saxo2	NA	NA	FALSE	FALSE	0.698358	NA	FALSE
683	0.908806	NA	0.776042	0.785408	-0.00936606	TRUE	-0.054717	2 vs 1	-0.0187321	2 vs 1	0.552083	0.570815	Etfbkmt:ENSMUST00000111548.7, Etfbkmt:ENSMUST00000047531.15	Etfbkmt	NA	NA	FALSE	FALSE	0.908806	NA	FALSE
684	0.319186	0.389905	0.945481	0.954936	-0.00945499	FALSE	-0.200414	1 vs 2	-0.01891	1 vs 2	0.890961	0.909871	Cnot10:ENSMUST00000070117.7, Cnot10:ENSMUST00000216785.1	Cnot10	0.39871	0.464051	FALSE	FALSE	0.389905	0.497231	FALSE
685	0.00348026	0.0135149	0.687299	0.696953	-0.00965409	FALSE	-0.0453086	2 vs 1	-0.0193082	2 vs 1	0.374598	0.393907	Pomp:ENSMUST00000201120.1, Pomp:ENSMUST00000031654.9	Pomp	0.00670408	0.0242579	FALSE	FALSE	0.0135149	0.0260339	FALSE
686	0.625457	0.865992	0.743573	0.753233	-0.00965949	TRUE	-0.0513044	1 vs 2	-0.019319	1 vs 2	0.487147	0.506466	9430038I01Rik:ENSMUST00000117404.7, 9430038I01Rik:ENSMUST00000120340.1	9430038I01Rik	NA	NA	FALSE	FALSE	0.865992	NA	FALSE
687	0.392968	0.519298	0.771844	0.781598	-0.00975383	FALSE	-0.0562492	1 vs 2	-0.0195077	1 vs 2	0.543687	0.563195	Thrap3:ENSMUST00000080919.11, Thrap3:ENSMUST00000106142.7	Thrap3	0.476246	0.583607	FALSE	FALSE	0.519298	0.633544	FALSE
688	0.442793	0.646969	0.923504	0.933622	-0.0101179	FALSE	-0.152768	2 vs 1	-0.0202358	2 vs 1	0.847008	0.867244	Zfp280d:ENSMUST00000184517.7, Zfp280d:ENSMUST00000183410.7	Zfp280d	0.530293	0.705255	FALSE	FALSE	0.646969	0.75652	FALSE
689	0.210639	0.0335709	0.773723	0.784033	-0.0103099	FALSE	-0.0598708	1 vs 2	-0.0206198	1 vs 2	0.547446	0.568066	Ccl27a:ENSMUST00000108033.7, Ccl27a:ENSMUST00000108032.2	Ccl27a	0.282395	0.0548028	FALSE	FALSE	0.210639	0.292022	FALSE
690	0.503865	0.507506	0.847675	0.84851	-0.000834708	TRUE	0.276054	2 vs 1	-0.0206557	3 vs 2	0.750867	0.771523	Ap5m1:ENSMUST00000228238.1, Ap5m1:ENSMUST00000227431.1, Ap5m1:ENSMUST00000037473.5	Ap5m1	NA	NA	FALSE	FALSE	0.507506	NA	FALSE
691	0.250197	0.374909	0.926167	0.936508	-0.0103405	FALSE	-0.161989	1 vs 2	-0.0206811	1 vs 2	0.852335	0.873016	Pmm1:ENSMUST00000071462.6, Pmm1:ENSMUST00000230229.1	Pmm1	0.327044	0.449149	FALSE	FALSE	0.374909	0.479779	FALSE
692	0.112755	0.108122	0.0847437	0.0952003	-0.0104566	FALSE	-0.127843	1 vs 2	-0.0209133	1 vs 2	-0.830513	-0.809599	Brwd1:ENSMUST00000232755.1, Brwd1:ENSMUST00000113827.3	Brwd1	0.159955	0.151538	FALSE	FALSE	0.112755	0.169829	FALSE
693	0.138105	0.325481	0.574788	0.585408	-0.01062	FALSE	-0.0436006	2 vs 1	-0.0212399	2 vs 1	0.149575	0.170815	Ccnh:ENSMUST00000164127.7, Ccnh:ENSMUST00000022030.10	Ccnh	0.191464	0.396475	FALSE	FALSE	0.325481	0.42851	FALSE
694	0.938098	NA	0.623656	0.634328	-0.0106724	TRUE	-0.045736	1 vs 2	-0.0213449	1 vs 2	0.247312	0.268657	Trmt2b:ENSMUST00000087541.11, Trmt2b:ENSMUST00000087540.3	Trmt2b	NA	NA	FALSE	FALSE	0.938098	NA	FALSE
695	0.0166738	0.0405161	0.943083	0.953917	-0.010834	FALSE	-0.222572	2 vs 1	-0.0216679	2 vs 1	0.886166	0.907834	Sdf4:ENSMUST00000097734.10, Sdf4:ENSMUST00000050078.12	Sdf4	0.0291991	0.0650767	FALSE	FALSE	0.0405161	0.0689716	FALSE
696	0.819837	0.697875	0.262548	0.273632	-0.0110836	TRUE	-0.0564923	1 vs 2	-0.0221672	1 vs 2	-0.474903	-0.452736	Dynlt2a2:ENSMUST00000097400.4, Dynlt2a2:ENSMUST00000232299.1	Dynlt2a2	NA	NA	FALSE	FALSE	0.819837	NA	FALSE
697	0.0116143	0.0234338	0.0135747	0.0247606	-0.011186	TRUE	-0.612455	2 vs 1	-0.022372	2 vs 1	-0.972851	-0.950479	Cxcl12:ENSMUST00000112866.7, Cxcl12:ENSMUST00000073043.4	Cxcl12	NA	NA	FALSE	FALSE	0.0234338	NA	FALSE
698	0.567487	NA	0.97733	0.988571	-0.0112415	TRUE	-0.696364	2 vs 1	-0.0224829	2 vs 1	0.95466	0.977143	Smcr8:ENSMUST00000102667.4, Smcr8:ENSMUST00000056907.6	Smcr8	NA	NA	FALSE	FALSE	0.567487	NA	FALSE
699	0.314937	0.70086	0.372508	0.383759	-0.011251	FALSE	-0.047849	1 vs 2	-0.022502	1 vs 2	-0.254985	-0.232483	Cops7a:ENSMUST00000112439.8, Cops7a:ENSMUST00000032220.14	Cops7a	0.395744	0.75628	FALSE	FALSE	0.70086	0.805557	FALSE
700	0.837523	NA	0.091954	0.103226	-0.0112718	TRUE	-0.128121	1 vs 2	-0.0225436	1 vs 2	-0.816092	-0.793548	Obsl1:ENSMUST00000113567.8, Obsl1:ENSMUST00000113565.2	Obsl1	NA	NA	FALSE	FALSE	0.837523	NA	FALSE
701	0.174197	NA	0.97335	0.984674	-0.0113246	FALSE	-0.564837	2 vs 1	-0.0226492	2 vs 1	0.946699	0.969349	Rmc1:ENSMUST00000126523.8, Rmc1:ENSMUST00000025276.14	Rmc1	0.237896	NA	FALSE	FALSE	0.174197	0.250024	FALSE
702	1	NA	0.497561	0.509091	-0.0115299	TRUE	-0.0461238	2 vs 1	-0.0230599	2 vs 1	-0.00487805	0.0181818	Mcmdc2:ENSMUST00000052843.11, Mcmdc2:ENSMUST00000171802.7	Mcmdc2	NA	NA	FALSE	FALSE	1	NA	FALSE
703	0.461753	0.76918	0.846342	0.858117	-0.011775	FALSE	-0.0935437	1 vs 2	-0.02355	1 vs 2	0.692685	0.716235	Zfp87:ENSMUST00000181767.7, Zfp87:ENSMUST00000181573.1	Zfp87	0.550494	0.815083	FALSE	FALSE	0.76918	0.858292	FALSE
704	0.000177427	0.00163718	0.944415	0.956717	-0.0123021	FALSE	-0.263099	2 vs 1	-0.0246042	2 vs 1	0.888831	0.913435	Ssbp1:ENSMUST00000031971.12, Ssbp1:ENSMUST00000114779.8	Ssbp1	0.000411002	0.0034155	FALSE	FALSE	0.00163718	0.00360968	FALSE
705	0.535815	0.683508	0.0615942	0.073955	-0.0123608	TRUE	-0.196148	2 vs 1	-0.0247216	2 vs 1	-0.876812	-0.85209	Gfm2:ENSMUST00000161639.7, Gfm2:ENSMUST00000161825.7	Gfm2	NA	NA	FALSE	FALSE	0.683508	NA	FALSE
706	1	NA	0.833333	0.846154	-0.0128205	TRUE	-0.0953102	2 vs 1	-0.025641	2 vs 1	0.666667	0.692308	Map7:ENSMUST00000213312.1, Map7:ENSMUST00000116259.4	Map7	NA	NA	FALSE	FALSE	1	NA	FALSE
707	0.00302046	0.000433241	0.952912	0.96612	-0.013208	FALSE	-0.342958	2 vs 1	-0.0264161	2 vs 1	0.905824	0.93224	Stx6:ENSMUST00000195302.5, Stx6:ENSMUST00000027743.12	Stx6	0.00594348	0.000995359	FALSE	FALSE	0.00302046	0.0063901	FALSE
708	0.635744	NA	0.964371	0.977612	-0.0132414	TRUE	-0.478282	1 vs 2	-0.0264828	1 vs 2	0.928741	0.955224	Bdp1:ENSMUST00000038104.11, Bdp1:ENSMUST00000109379.8	Bdp1	NA	NA	FALSE	FALSE	0.635744	NA	FALSE
709	0.490152	0.210503	0.860552	0.873874	-0.0133223	TRUE	-0.115775	2 vs 1	-0.0266446	2 vs 1	0.721103	0.747748	Blvra:ENSMUST00000110389.9, Blvra:ENSMUST00000002064.14	Blvra	NA	NA	FALSE	FALSE	0.490152	NA	FALSE
710	0.285625	0.548081	0.644233	0.657638	-0.0134052	FALSE	-0.0590023	2 vs 1	-0.0268103	2 vs 1	0.288466	0.315276	Tprkb:ENSMUST00000089570.6, Tprkb:ENSMUST00000113753.7	Tprkb	0.365521	0.612164	FALSE	FALSE	0.548081	0.662038	FALSE
711	0.143383	0.132462	0.908942	0.922727	-0.0137855	FALSE	-0.179211	1 vs 2	-0.027571	1 vs 2	0.817884	0.845455	Sirt7:ENSMUST00000080202.11, Sirt7:ENSMUST00000106183.2	Sirt7	0.19803	0.182135	FALSE	FALSE	0.143383	0.210755	FALSE
712	0.473798	0.743071	0.200831	0.214724	-0.0138929	FALSE	-0.0844263	2 vs 1	-0.0277858	2 vs 1	-0.598338	-0.570552	Lcor:ENSMUST00000067795.12, Lcor:ENSMUST00000238398.1	Lcor	0.561198	0.795678	FALSE	FALSE	0.743071	0.841994	FALSE
713	0.521906	0.242762	0.0759109	0.0902256	-0.0143146	TRUE	-0.188364	1 vs 2	-0.0286293	1 vs 2	-0.848178	-0.819549	Zfp940:ENSMUST00000108223.7, Zfp940:ENSMUST00000085792.4	Zfp940	NA	NA	FALSE	FALSE	0.521906	NA	FALSE
714	0.375655	0.476963	0.781212	0.795569	-0.0143566	FALSE	-0.0860815	2 vs 1	-0.0287132	2 vs 1	0.562425	0.591138	Tmx3:ENSMUST00000235634.1, Tmx3:ENSMUST00000025515.6	Tmx3	0.458299	0.547904	FALSE	FALSE	0.476963	0.591757	FALSE
715	0.797778	0.190238	0.684752	0.699301	-0.0145486	TRUE	-0.0682725	2 vs 1	-0.0290972	2 vs 1	0.369504	0.398601	Magi2:ENSMUST00000208219.1, Magi2:ENSMUST00000101558.9	Magi2	NA	NA	FALSE	FALSE	0.797778	NA	FALSE
716	0.313411	0.4672	0.0468384	0.0614973	-0.0146589	TRUE	-0.287789	1 vs 2	-0.0293178	1 vs 2	-0.906323	-0.877005	Chrnb2:ENSMUST00000200558.4, Chrnb2:ENSMUST00000029562.4	Chrnb2	NA	NA	FALSE	FALSE	0.4672	NA	FALSE
717	0.236183	0.0990079	0.920728	0.935705	-0.0149768	FALSE	-0.225534	2 vs 1	-0.0299535	2 vs 1	0.841455	0.871409	Polr3f:ENSMUST00000110017.2, Polr3f:ENSMUST00000028914.8	Polr3f	0.312068	0.142055	FALSE	FALSE	0.236183	0.324973	FALSE
718	0.421312	0.00245367	0.34348	0.358646	-0.0151655	TRUE	-0.0665762	2 vs 1	-0.0303309	2 vs 1	-0.313039	-0.282708	Gin1:ENSMUST00000112842.7, Gin1:ENSMUST00000027571.12	Gin1	NA	NA	FALSE	FALSE	0.421312	NA	FALSE
719	0.0969596	0.190626	0.301453	0.316671	-0.015218	FALSE	-0.0712753	1 vs 2	-0.030436	1 vs 2	-0.397093	-0.366657	Dnajc2:ENSMUST00000115193.7, Dnajc2:ENSMUST00000115192.1	Dnajc2	0.139982	0.246253	FALSE	FALSE	0.190626	0.267315	FALSE
720	0.444461	NA	0.0189531	0.034188	-0.015235	TRUE	-0.605561	1 vs 2	-0.0304699	1 vs 2	-0.962094	-0.931624	Cdkl5:ENSMUST00000087104.10, Cdkl5:ENSMUST00000198931.1	Cdkl5	NA	NA	FALSE	FALSE	0.444461	NA	FALSE
721	0.00648171	0.0179526	0.928799	0.944263	-0.0154649	FALSE	-0.261391	1 vs 2	-0.0309298	1 vs 2	0.857597	0.888527	Gmcl1:ENSMUST00000001185.13, Gmcl1:ENSMUST00000113679.1	Gmcl1	0.0121657	0.0310323	FALSE	FALSE	0.0179526	0.0333535	FALSE
722	0.062707	0.0536368	0.887161	0.890221	-0.00306058	FALSE	-0.474199	2 vs 1	-0.0310625	2 vs 1	0.0999338	0.130996	Fto:ENSMUST00000125471.7, Fto:ENSMUST00000128081.7, Fto:ENSMUST00000069718.14	Fto	0.0936765	0.0828517	FALSE	FALSE	0.062707	0.101105	FALSE
723	0.388792	0.702111	0.539174	0.554759	-0.0155854	FALSE	-0.0629019	2 vs 1	-0.0311708	2 vs 1	0.0783481	0.109519	Rabep1:ENSMUST00000179114.7, Rabep1:ENSMUST00000100928.10	Rabep1	0.47275	0.75628	FALSE	FALSE	0.702111	0.805557	FALSE
724	0.27617	0.234139	0.899324	0.915108	-0.0157836	TRUE	-0.187922	2 vs 1	-0.0315672	2 vs 1	0.798649	0.830216	Mtmr2:ENSMUST00000156801.7, Mtmr2:ENSMUST00000034396.13	Mtmr2	NA	NA	FALSE	FALSE	0.27617	NA	FALSE
725	0.444942	0.65498	0.926471	0.942373	-0.0159023	TRUE	-0.260711	2 vs 1	-0.0318046	2 vs 1	0.852941	0.884746	Chodl:ENSMUST00000114216.1, Chodl:ENSMUST00000023568.13	Chodl	NA	NA	FALSE	FALSE	0.65498	NA	FALSE
726	0.208859	0.439843	0.495764	0.511737	-0.0159731	FALSE	-0.0639015	1 vs 2	-0.0319462	1 vs 2	-0.00847204	0.0234742	Tmx4:ENSMUST00000038228.10, Tmx4:ENSMUST00000110120.1	Tmx4	0.281038	0.510105	FALSE	FALSE	0.439843	0.55131	FALSE
727	0.0190111	0.0336667	0.579327	0.595727	-0.0164003	FALSE	-0.0676822	1 vs 2	-0.0328006	1 vs 2	0.158654	0.191455	1500011B03Rik:ENSMUST00000112160.3, 1500011B03Rik:ENSMUST00000100850.5	1500011B03Rik	0.0329766	0.0548028	FALSE	FALSE	0.0336667	0.0581227	FALSE
728	0.086662	0.189183	0.916523	0.933124	-0.0166003	FALSE	-0.239671	1 vs 2	-0.0332006	1 vs 2	0.833046	0.866247	Cenps:ENSMUST00000177408.1, Cenps:ENSMUST00000105695.1	Cenps	0.126368	0.245263	FALSE	FALSE	0.189183	0.266312	FALSE
729	0.00940896	0.086473	0.926667	0.943344	-0.0166772	FALSE	-0.275853	1 vs 2	-0.0333545	1 vs 2	0.853333	0.886688	Fbrsl1:ENSMUST00000069483.11, Fbrsl1:ENSMUST00000198415.2	Fbrsl1	0.0170479	0.126571	FALSE	FALSE	0.086473	0.135253	FALSE
730	0.602696	0.951853	0.524182	0.540897	-0.016715	TRUE	-0.0671508	2 vs 1	-0.03343	2 vs 1	0.0483642	0.0817942	Ocrl:ENSMUST00000115020.7, Ocrl:ENSMUST00000001202.14	Ocrl	NA	NA	FALSE	FALSE	0.951853	NA	FALSE
731	0.294621	NA	0.920094	0.937008	-0.0169139	TRUE	-0.256057	2 vs 1	-0.0338277	2 vs 1	0.840188	0.874016	Sufu:ENSMUST00000118440.2, Sufu:ENSMUST00000039922.12	Sufu	NA	NA	FALSE	FALSE	0.294621	NA	FALSE
732	0.911306	0.969654	0.513043	0.53	-0.0169565	TRUE	-0.0679586	1 vs 2	-0.033913	1 vs 2	0.026087	0.06	Eaf2:ENSMUST00000114825.2, Eaf2:ENSMUST00000023537.5	Eaf2	NA	NA	FALSE	FALSE	0.969654	NA	FALSE
733	1	0.99308	0.84	0.857143	-0.0171429	TRUE	-0.133531	2 vs 1	-0.0342857	2 vs 1	0.68	0.714286	Ttll9:ENSMUST00000103155.9, Ttll9:ENSMUST00000099197.8	Ttll9	NA	NA	FALSE	FALSE	1	NA	FALSE
734	0.100686	0.0729941	0.586693	0.591051	-0.00435831	FALSE	-0.65826	4 vs 2	-0.0349803	3 vs 2	0.714239	0.74922	Dcaf17:ENSMUST00000112159.8, Dcaf17:ENSMUST00000102701.4, Dcaf17:ENSMUST00000154704.7, Dcaf17:ENSMUST00000064141.11	Dcaf17	0.144513	0.109491	FALSE	FALSE	0.100686	0.155489	FALSE
735	1	NA	0.899105	0.916667	-0.0175617	TRUE	-0.210576	2 vs 1	-0.0351234	2 vs 1	0.79821	0.833333	Lrfn5:ENSMUST00000055815.13, Lrfn5:ENSMUST00000119481.1	Lrfn5	NA	NA	FALSE	FALSE	1	NA	FALSE
736	0.438236	0.542924	0.0977011	0.115385	-0.0176835	TRUE	-0.186151	2 vs 1	-0.0353669	2 vs 1	-0.804598	-0.769231	Dclre1c:ENSMUST00000102988.9, Dclre1c:ENSMUST00000061852.11	Dclre1c	NA	NA	FALSE	FALSE	0.542924	NA	FALSE
737	0.126204	0.176493	0.894959	0.912854	-0.0178948	FALSE	-0.206562	2 vs 1	-0.0357896	2 vs 1	0.789919	0.825708	2510002D24Rik:ENSMUST00000123146.7, 2510002D24Rik:ENSMUST00000055413.12	2510002D24Rik	0.176976	0.232971	FALSE	FALSE	0.176493	0.251348	FALSE
738	0.0377501	0.124122	0.884227	0.902235	-0.0180079	FALSE	-0.195688	3 vs 1	-0.0360158	3 vs 1	0.768453	0.804469	Stx8:ENSMUST00000108675.1, Stx8:ENSMUST00000021286.10, Stx8:ENSMUST00000021285.13	Stx8	0.0600719	0.172629	FALSE	FALSE	0.124122	0.186182	FALSE
739	0.763321	NA	0.376784	0.395161	-0.0183773	TRUE	-0.0775532	1 vs 2	-0.0367546	1 vs 2	-0.246432	-0.209677	Ezh1:ENSMUST00000107284.7, Ezh1:ENSMUST00000100417.2	Ezh1	NA	NA	FALSE	FALSE	0.763321	NA	FALSE
740	0.00292544	0.0109438	0.269726	0.288123	-0.0183972	FALSE	-0.0914965	2 vs 1	-0.0367944	2 vs 1	-0.460548	-0.423754	Ip6k2:ENSMUST00000192028.5, Ip6k2:ENSMUST00000085018.5	Ip6k2	0.00581196	0.0200635	FALSE	FALSE	0.0109438	0.0214267	FALSE
741	0.414415	0.726082	0.851383	0.869792	-0.0184083	TRUE	-0.153625	2 vs 1	-0.0368165	2 vs 1	0.702767	0.739583	2210418O10Rik:ENSMUST00000135430.1, 2210418O10Rik:ENSMUST00000099009.8	2210418O10Rik	NA	NA	FALSE	FALSE	0.726082	NA	FALSE
742	0.202709	0.265397	0.937608	0.956217	-0.0186088	TRUE	-0.373843	2 vs 1	-0.0372177	2 vs 1	0.875217	0.912434	Foxp2:ENSMUST00000115470.2, Foxp2:ENSMUST00000115477.7	Foxp2	NA	NA	FALSE	FALSE	0.265397	NA	FALSE
743	2.20123e-10	7.97604e-08	0.914739	0.933532	-0.0187934	FALSE	-0.269339	1 vs 2	-0.0375868	1 vs 2	0.829478	0.867065	Hnrnph3:ENSMUST00000020263.13, Hnrnph3:ENSMUST00000119814.2	Hnrnph3	7.60048e-10	2.47462e-07	FALSE	FALSE	7.97604e-08	2.51658e-07	FALSE
744	1.88234e-07	9.20031e-07	0.928817	0.947641	-0.018824	FALSE	-0.327192	2 vs 1	-0.037648	2 vs 1	0.857633	0.895281	Ivns1abp:ENSMUST00000111887.9, Ivns1abp:ENSMUST00000023918.12	Ivns1abp	5.46774e-07	2.65057e-06	FALSE	FALSE	9.20031e-07	2.71558e-06	FALSE
745	0.515947	0.225835	0.678685	0.697572	-0.0188867	TRUE	-0.0880259	2 vs 1	-0.0377734	2 vs 1	0.35737	0.395143	Ikbip:ENSMUST00000020149.5, Ikbip:ENSMUST00000020150.9	Ikbip	NA	NA	FALSE	FALSE	0.515947	NA	FALSE
746	6.01054e-18	5.07947e-15	0.055305	0.0742574	-0.0189524	FALSE	-0.314941	2 vs 1	-0.0379049	2 vs 1	-0.88939	-0.851485	Dnajb6:ENSMUST00000114839.7, Dnajb6:ENSMUST00000008733.14	Dnajb6	2.97278e-17	2.33398e-14	FALSE	FALSE	5.07947e-15	2.35327e-14	FALSE
747	0.48609	0.633999	0.788421	0.807487	-0.0190656	TRUE	-0.118327	2 vs 1	-0.0381312	2 vs 1	0.576842	0.614973	Larp4:ENSMUST00000230956.1, Larp4:ENSMUST00000100206.3	Larp4	NA	NA	FALSE	FALSE	0.633999	NA	FALSE
748	0.130295	0.0228567	0.711576	0.731358	-0.0197823	TRUE	-0.0984744	1 vs 2	-0.0395646	1 vs 2	0.423152	0.462716	Lhx9:ENSMUST00000019374.13, Lhx9:ENSMUST00000046870.12	Lhx9	NA	NA	FALSE	FALSE	0.130295	NA	FALSE
749	0.885496	NA	0.714286	0.734177	-0.0198915	TRUE	-0.0996298	2 vs 1	-0.039783	2 vs 1	0.428571	0.468354	Bend7:ENSMUST00000115022.7, Bend7:ENSMUST00000056914.6	Bend7	NA	NA	FALSE	FALSE	0.885496	NA	FALSE
750	0.537557	0.872055	0.699257	0.719373	-0.0201158	TRUE	-0.21555	2 vs 1	-0.0402316	3 vs 1	0.398515	0.438746	Agbl5:ENSMUST00000069705.10, Agbl5:ENSMUST00000202060.3, Agbl5:ENSMUST00000201917.3	Agbl5	NA	NA	FALSE	FALSE	0.872055	NA	FALSE
751	0.112604	0.194147	0.940305	0.96044	-0.0201344	TRUE	-0.432602	2 vs 1	-0.0402687	2 vs 1	0.88061	0.920879	Tspan17:ENSMUST00000163915.7, Tspan17:ENSMUST00000026993.13	Tspan17	NA	NA	FALSE	FALSE	0.194147	NA	FALSE
752	0.524852	0.772855	0.762319	0.782477	-0.0201585	TRUE	-0.114727	1 vs 2	-0.040317	1 vs 2	0.524638	0.564955	Samhd1:ENSMUST00000057725.9, Samhd1:ENSMUST00000109549.2	Samhd1	NA	NA	FALSE	FALSE	0.772855	NA	FALSE
753	0.679627	0.651446	0.365796	0.386047	-0.0202508	TRUE	-0.0863347	2 vs 1	-0.0405016	2 vs 1	-0.268409	-0.227907	Zfp809:ENSMUST00000215902.1, Zfp809:ENSMUST00000072465.8	Zfp809	NA	NA	FALSE	FALSE	0.679627	NA	FALSE
754	0.0303871	0.0734591	0.928067	0.94837	-0.0203025	FALSE	-0.353263	2 vs 1	-0.040605	2 vs 1	0.856134	0.896739	Dele1:ENSMUST00000236078.1, Dele1:ENSMUST00000025314.6	Dele1	0.0498729	0.109735	FALSE	FALSE	0.0734591	0.116896	FALSE
755	0.821426	NA	0.858333	0.878788	-0.0204545	TRUE	-0.179486	2 vs 1	-0.0409091	2 vs 1	0.716667	0.757576	Mrtfb:ENSMUST00000115809.7, Mrtfb:ENSMUST00000149359.1	Mrtfb	NA	NA	FALSE	FALSE	0.821426	NA	FALSE
756	0.00202005	0.00187357	0.120147	0.140609	-0.0204621	FALSE	-0.180799	1 vs 2	-0.0409243	1 vs 2	-0.759706	-0.718781	Epha5:ENSMUST00000053733.14, Epha5:ENSMUST00000113398.7	Epha5	0.00410744	0.00386424	FALSE	FALSE	0.00202005	0.00440082	FALSE
757	0.395056	NA	0.884669	0.905172	-0.0205039	TRUE	-0.218663	1 vs 2	-0.0410078	1 vs 2	0.769337	0.810345	Sptbn1:ENSMUST00000006629.13, Sptbn1:ENSMUST00000102838.9	Sptbn1	NA	NA	FALSE	FALSE	0.395056	NA	FALSE
758	0.0471517	0.0845842	0.898599	0.919192	-0.0205929	FALSE	-0.249663	2 vs 1	-0.0411857	2 vs 1	0.797198	0.838384	Spg7:ENSMUST00000108868.10, Spg7:ENSMUST00000125975.7	Spg7	0.0725106	0.124308	FALSE	FALSE	0.0845842	0.132866	FALSE
759	0.261486	0.79599	0.769092	0.789786	-0.0206942	TRUE	-0.120446	1 vs 2	-0.0413884	1 vs 2	0.538184	0.579572	Pxmp4:ENSMUST00000000896.10, Pxmp4:ENSMUST00000109703.2	Pxmp4	NA	NA	FALSE	FALSE	0.79599	NA	FALSE
760	0.100934	0.409116	0.935004	0.955752	-0.0207483	TRUE	-0.40647	2 vs 1	-0.0414966	2 vs 1	0.870008	0.911504	Lig3:ENSMUST00000131537.8, Lig3:ENSMUST00000021039.11	Lig3	NA	NA	FALSE	FALSE	0.409116	NA	FALSE
761	1	NA	0.979167	1	-0.0208333	TRUE	#NAME?	1 vs 2	-0.0416667	1 vs 2	0.958333	1	Cd37:ENSMUST00000209779.1, Cd37:ENSMUST00000210372.1	Cd37	NA	NA	FALSE	FALSE	1	NA	FALSE
762	0.230428	0.157448	0.878951	0.9	-0.0210486	TRUE	-0.214687	2 vs 1	-0.0420971	2 vs 1	0.757903	0.8	Parg:ENSMUST00000163350.7, Parg:ENSMUST00000022470.14	Parg	NA	NA	FALSE	FALSE	0.230428	NA	FALSE
763	0.736172	NA	0.776753	0.79798	-0.021227	TRUE	-0.126873	2 vs 1	-0.0424541	2 vs 1	0.553506	0.59596	Zc3h6:ENSMUST00000110319.2, Zc3h6:ENSMUST00000110320.8	Zc3h6	NA	NA	FALSE	FALSE	0.736172	NA	FALSE
764	0.266542	0.111848	0.164638	0.185965	-0.0213272	TRUE	-0.147673	1 vs 2	-0.0426545	1 vs 2	-0.670725	-0.62807	Cdh8:ENSMUST00000142129.7, Cdh8:ENSMUST00000093249.10	Cdh8	NA	NA	FALSE	FALSE	0.266542	NA	FALSE
765	0.0540182	0.058846	0.863521	0.884892	-0.0213709	FALSE	-0.194746	1 vs 2	-0.0427417	1 vs 2	0.727042	0.769784	Rbm26:ENSMUST00000163545.7, Rbm26:ENSMUST00000163499.1	Rbm26	0.0813608	0.0901313	FALSE	FALSE	0.058846	0.0952993	FALSE
766	0.0514995	0.0685545	0.936901	0.958395	-0.0214938	FALSE	-0.439166	1 vs 2	-0.0429877	1 vs 2	0.873803	0.91679	Brd4:ENSMUST00000003726.15, Brd4:ENSMUST00000120276.8	Brd4	0.0781362	0.103258	FALSE	FALSE	0.0685545	0.109567	FALSE
767	2.23311e-08	0.000110553	0.25455	0.276134	-0.0215837	FALSE	-0.110769	2 vs 1	-0.0431674	2 vs 1	-0.4909	-0.447732	Ak6:ENSMUST00000190729.1, Ak6:ENSMUST00000022135.14	Ak6	6.81099e-08	0.000269334	FALSE	FALSE	0.000110553	0.00027714	FALSE
768	0.132585	0.308647	0.733646	0.755365	-0.0217184	FALSE	-0.11423	1 vs 2	-0.0434368	1 vs 2	0.467293	0.51073	Ralgps2:ENSMUST00000172057.7, Ralgps2:ENSMUST00000190648.6	Ralgps2	0.18451	0.381084	FALSE	FALSE	0.308647	0.41379	FALSE
769	0.206199	0.594249	0.830681	0.852459	-0.0217779	FALSE	-0.163557	1 vs 2	-0.0435558	1 vs 2	0.661362	0.704918	Wnk2:ENSMUST00000162581.7, Wnk2:ENSMUST00000091623.9	Wnk2	0.278483	0.655661	FALSE	FALSE	0.594249	0.706153	FALSE
770	5.11428e-11	1.89305e-11	0.0306306	0.052788	-0.0221573	FALSE	-0.567406	1 vs 2	-0.0443147	1 vs 2	-0.938739	-0.894424	Pdlim7:ENSMUST00000046246.12, Pdlim7:ENSMUST00000131306.7	Pdlim7	1.87183e-10	7.1581e-11	FALSE	FALSE	5.11428e-11	1.94982e-10	FALSE
771	0.364619	0.130388	0.812272	0.834711	-0.022439	TRUE	-0.154549	1 vs 2	-0.044878	1 vs 2	0.624543	0.669421	Hip1:ENSMUST00000060311.11, Hip1:ENSMUST00000212301.1	Hip1	NA	NA	FALSE	FALSE	0.364619	NA	FALSE
772	0.133798	0.434175	0.0756501	0.0981481	-0.022498	TRUE	-0.284999	2 vs 1	-0.0449961	2 vs 1	-0.8487	-0.803704	Rgs12:ENSMUST00000114280.7, Rgs12:ENSMUST00000087684.10	Rgs12	NA	NA	FALSE	FALSE	0.434175	NA	FALSE
773	0.0017663	0.00928365	0.075104	0.097704	-0.0225999	FALSE	-0.287806	1 vs 2	-0.0451998	1 vs 2	-0.849792	-0.804592	Cdc23:ENSMUST00000025228.11, Cdc23:ENSMUST00000133181.1	Cdc23	0.00363183	0.017371	FALSE	FALSE	0.00928365	0.0184664	FALSE
774	0.126454	NA	0.921185	0.94382	-0.0226352	TRUE	-0.362821	1 vs 2	-0.0452704	1 vs 2	0.84237	0.88764	Dcun1d2:ENSMUST00000110838.7, Dcun1d2:ENSMUST00000203604.1	Dcun1d2	NA	NA	FALSE	FALSE	0.126454	NA	FALSE
775	0.294787	0.292543	0.789091	0.811808	-0.0227172	TRUE	-0.142348	2 vs 1	-0.0454344	2 vs 1	0.578182	0.623616	Virma:ENSMUST00000055372.13, Virma:ENSMUST00000059914.12	Virma	NA	NA	FALSE	FALSE	0.294787	NA	FALSE
776	0.663086	0.674042	0.799392	0.822222	-0.0228301	TRUE	-0.148977	2 vs 1	-0.0456602	2 vs 1	0.598784	0.644444	Myo19:ENSMUST00000020837.6, Myo19:ENSMUST00000093969.10	Myo19	NA	NA	FALSE	FALSE	0.674042	NA	FALSE
777	0.513776	0.655428	0.676056	0.69967	-0.0236136	TRUE	-0.11002	2 vs 1	-0.0472273	2 vs 1	0.352113	0.39934	Cdk12:ENSMUST00000003203.13, Cdk12:ENSMUST00000107539.7	Cdk12	NA	NA	FALSE	FALSE	0.655428	NA	FALSE
778	0.764661	NA	0.862069	0.885714	-0.0236453	TRUE	-0.215111	2 vs 1	-0.0472906	2 vs 1	0.724138	0.771429	Gm14403:ENSMUST00000108947.2, Gm14403:ENSMUST00000108940.2	Gm14403	NA	NA	FALSE	FALSE	0.764661	NA	FALSE
779	0.0311521	0.00446159	0.903185	0.927199	-0.0240139	FALSE	-0.311313	2 vs 1	-0.0480279	2 vs 1	0.80637	0.854398	Wdr48:ENSMUST00000217472.1, Wdr48:ENSMUST00000215307.1	Wdr48	0.0509003	0.00885003	FALSE	FALSE	0.0311521	0.0544736	FALSE
780	0.00243822	0.00119313	0.804	0.828059	-0.0240591	FALSE	-0.160449	1 vs 2	-0.0481181	1 vs 2	0.608	0.656118	Zkscan3:ENSMUST00000070785.15, Zkscan3:ENSMUST00000117721.7	Zkscan3	0.00493032	0.00253278	FALSE	FALSE	0.00243822	0.0052804	FALSE
781	0.113453	0.543061	0.884474	0.908549	-0.0240748	TRUE	-0.260545	1 vs 2	-0.0481495	1 vs 2	0.768948	0.817097	Ank2:ENSMUST00000044443.14, Ank2:ENSMUST00000182994.7	Ank2	NA	NA	FALSE	FALSE	0.543061	NA	FALSE
782	0.161748	0.114981	0.899275	0.923434	-0.0241585	TRUE	-0.300746	1 vs 2	-0.048317	1 vs 2	0.798551	0.846868	2610044O15Rik8:ENSMUST00000190157.6, 2610044O15Rik8:ENSMUST00000186619.6	2610044O15Rik8	NA	NA	FALSE	FALSE	0.161748	NA	FALSE
783	0.0731653	0.318481	0.639459	0.663957	-0.0244975	FALSE	-0.107959	1 vs 2	-0.0489949	1 vs 2	0.278918	0.327913	Gart:ENSMUST00000023684.13, Gart:ENSMUST00000231380.1	Gart	0.108415	0.390569	FALSE	FALSE	0.318481	0.422333	FALSE
784	0.527526	0.353085	0.868603	0.89313	-0.0245267	TRUE	-0.234453	1 vs 2	-0.0490535	1 vs 2	0.737206	0.78626	Tbc1d8:ENSMUST00000054462.10, Tbc1d8:ENSMUST00000193823.1	Tbc1d8	NA	NA	FALSE	FALSE	0.527526	NA	FALSE
785	0.0184423	0.00426309	0.884945	0.909609	-0.0246631	FALSE	-0.268745	1 vs 2	-0.0493263	1 vs 2	0.769891	0.819217	Polr3c:ENSMUST00000029741.8, Polr3c:ENSMUST00000125183.1	Polr3c	0.0321423	0.00850275	FALSE	FALSE	0.0184423	0.0340903	FALSE
786	0.115201	0.0683588	0.344744	0.360502	-0.0157573	TRUE	-0.34101	2 vs 3	-0.0495533	2 vs 3	-0.55739	-0.507837	Trim9:ENSMUST00000110522.9, Trim9:ENSMUST00000222316.1, Trim9:ENSMUST00000167755.2	Trim9	NA	NA	FALSE	FALSE	0.115201	NA	FALSE
787	0.664407	0.86717	0.594595	0.619835	-0.0252401	TRUE	-0.105854	2 vs 1	-0.0504802	2 vs 1	0.189189	0.239669	Klf5:ENSMUST00000226784.1, Klf5:ENSMUST00000005279.7	Klf5	NA	NA	FALSE	FALSE	0.86717	NA	FALSE
788	0.000757493	0.00295819	0.766165	0.791429	-0.0252637	FALSE	-0.146777	1 vs 2	-0.0505274	1 vs 2	0.53233	0.582857	Rexo2:ENSMUST00000034524.4, Rexo2:ENSMUST00000217037.1	Rexo2	0.0016213	0.00603272	FALSE	FALSE	0.00295819	0.00629476	FALSE
789	0.304895	0.700034	0.718902	0.744186	-0.0252836	TRUE	-0.128817	1 vs 2	-0.0505672	1 vs 2	0.437805	0.488372	Ecpas:ENSMUST00000102889.9, Ecpas:ENSMUST00000107557.8	Ecpas	NA	NA	FALSE	FALSE	0.700034	NA	FALSE
790	0.399619	0.407293	0.919075	0.944444	-0.0253693	TRUE	-0.403366	1 vs 2	-0.0507386	1 vs 2	0.83815	0.888889	Top3a:ENSMUST00000002891.10, Top3a:ENSMUST00000102668.9	Top3a	NA	NA	FALSE	FALSE	0.407293	NA	FALSE
791	1.24236e-05	6.23045e-07	0.910483	0.936058	-0.025575	FALSE	-0.364154	2 vs 1	-0.05115	2 vs 1	0.820966	0.872116	Dhrs4:ENSMUST00000226168.1, Dhrs4:ENSMUST00000022821.7	Dhrs4	3.20215e-05	1.83874e-06	FALSE	FALSE	1.24236e-05	3.44474e-05	FALSE
792	0.0820024	0.160152	0.792952	0.818692	-0.02574	FALSE	-0.164699	2 vs 1	-0.0514801	2 vs 1	0.585903	0.637383	Pwwp2a:ENSMUST00000061070.5, Pwwp2a:ENSMUST00000094294.4	Pwwp2a	0.120534	0.214521	FALSE	FALSE	0.160152	0.231682	FALSE
793	0.194078	0.253361	0.809149	0.834897	-0.0257478	TRUE	-0.176247	2 vs 1	-0.0514955	2 vs 1	0.618298	0.669794	Ube3c:ENSMUST00000199032.1, Ube3c:ENSMUST00000049453.8	Ube3c	NA	NA	FALSE	FALSE	0.253361	NA	FALSE
794	0.0355444	0.0976906	0.573457	0.599295	-0.0258383	FALSE	-0.10656	2 vs 1	-0.0516766	2 vs 1	0.146913	0.19859	Ppp4r3b:ENSMUST00000102856.8, Ppp4r3b:ENSMUST00000020755.11	Ppp4r3b	0.0572915	0.140735	FALSE	FALSE	0.0976906	0.151518	FALSE
795	0.119254	0.305127	0.838302	0.864179	-0.0258774	FALSE	-0.204797	1 vs 2	-0.0517548	1 vs 2	0.676603	0.728358	Ep400:ENSMUST00000041558.14, Ep400:ENSMUST00000146458.8	Ep400	0.167873	0.378025	FALSE	FALSE	0.305127	0.410576	FALSE
796	0.00744653	0.0258374	0.648748	0.674695	-0.0259471	FALSE	-0.115958	2 vs 1	-0.0518943	2 vs 1	0.297497	0.349391	Czib:ENSMUST00000120473.7, Czib:ENSMUST00000106727.9	Czib	0.0138347	0.0436231	FALSE	FALSE	0.0258374	0.0470472	FALSE
797	0.000202501	0.000683094	0.807852	0.833913	-0.0260609	FALSE	-0.177504	1 vs 2	-0.0521218	1 vs 2	0.615705	0.667826	Cisd2:ENSMUST00000029815.7, Cisd2:ENSMUST00000120988.1	Cisd2	0.000463221	0.00151197	FALSE	FALSE	0.000683094	0.00160264	FALSE
798	0.238954	0.235847	0.306706	0.333333	-0.0266278	TRUE	-0.12242	1 vs 2	-0.0532556	1 vs 2	-0.386589	-0.333333	Bcl2:ENSMUST00000112751.1, Bcl2:ENSMUST00000189999.1	Bcl2	NA	NA	FALSE	FALSE	0.238954	NA	FALSE
799	5.14554e-10	1.44116e-10	0.912284	0.939105	-0.026821	FALSE	-0.393932	1 vs 2	-0.053642	1 vs 2	0.824569	0.878211	Mrpl15:ENSMUST00000156816.6, Mrpl15:ENSMUST00000146665.2	Mrpl15	1.71206e-09	4.98229e-10	FALSE	FALSE	5.14554e-10	1.79359e-09	FALSE
800	0.182916	0.0486957	0.786344	0.813743	-0.0273996	TRUE	-0.171494	2 vs 1	-0.0547992	2 vs 1	0.572687	0.627486	Gdap2:ENSMUST00000106997.1, Gdap2:ENSMUST00000029459.9	Gdap2	NA	NA	FALSE	FALSE	0.182916	NA	FALSE
801	0.931084	NA	0.472362	0.5	-0.0276382	TRUE	-0.110666	2 vs 1	-0.0552764	2 vs 1	-0.0552764	0	Disc1:ENSMUST00000122389.7, Disc1:ENSMUST00000118942.7	Disc1	NA	NA	FALSE	FALSE	0.931084	NA	FALSE
802	0.82564	NA	0.668639	0.696429	-0.0277895	TRUE	-0.128312	1 vs 2	-0.055579	1 vs 2	0.337278	0.392857	Ranbp17:ENSMUST00000102815.9, Ranbp17:ENSMUST00000037522.13	Ranbp17	NA	NA	FALSE	FALSE	0.82564	NA	FALSE
803	0.0421334	0.106522	0.926158	0.953947	-0.0277897	TRUE	-0.501711	1 vs 2	-0.0555793	1 vs 2	0.852315	0.907895	Gtpbp10:ENSMUST00000115441.8, Gtpbp10:ENSMUST00000198799.1	Gtpbp10	NA	NA	FALSE	FALSE	0.106522	NA	FALSE
804	0.550733	0.889592	0.460961	0.471074	-0.0101134	TRUE	-0.229477	2 vs 1	-0.0557045	2 vs 1	0.642643	0.698347	Clip4:ENSMUST00000229952.1, Clip4:ENSMUST00000024854.8, Clip4:ENSMUST00000229874.1	Clip4	NA	NA	FALSE	FALSE	0.889592	NA	FALSE
805	1	NA	0.971698	1	-0.0283019	TRUE	#NAME?	2 vs 1	-0.0566038	2 vs 1	0.943396	1	Hs3st2:ENSMUST00000206880.1, Hs3st2:ENSMUST00000084628.4	Hs3st2	NA	NA	FALSE	FALSE	1	NA	FALSE
806	0.000340523	0.00111067	0.181654	0.210023	-0.0283689	FALSE	-0.180394	2 vs 1	-0.0567378	2 vs 1	-0.636691	-0.579954	Wdr33:ENSMUST00000234344.1, Wdr33:ENSMUST00000025264.7	Wdr33	0.00076461	0.00238564	FALSE	FALSE	0.00111067	0.00252488	FALSE
807	0.373107	0.351278	0.248434	0.277372	-0.028938	TRUE	-0.149447	2 vs 1	-0.057876	2 vs 1	-0.503132	-0.445255	Tmem164:ENSMUST00000101198.8, Tmem164:ENSMUST00000112889.7	Tmem164	NA	NA	FALSE	FALSE	0.373107	NA	FALSE
808	0.548666	NA	0.879433	0.908451	-0.0290181	TRUE	-0.307795	2 vs 1	-0.0580362	2 vs 1	0.758865	0.816901	Megf11:ENSMUST00000093829.8, Megf11:ENSMUST00000068967.10	Megf11	NA	NA	FALSE	FALSE	0.548666	NA	FALSE
809	0.498013	NA	0.897742	0.926829	-0.0290869	TRUE	-0.366586	2 vs 1	-0.0581738	2 vs 1	0.795485	0.853659	Gnal:ENSMUST00000237445.1, Gnal:ENSMUST00000025402.14	Gnal	NA	NA	FALSE	FALSE	0.498013	NA	FALSE
810	0.713182	0.366034	0.849057	0.878378	-0.0293218	TRUE	-0.249942	1 vs 2	-0.0586435	1 vs 2	0.698113	0.756757	Vcam1:ENSMUST00000029574.12, Vcam1:ENSMUST00000196449.4	Vcam1	NA	NA	FALSE	FALSE	0.713182	NA	FALSE
811	0.0253996	0.048763	0.408946	0.438342	-0.0293957	FALSE	-0.120429	1 vs 2	-0.0587914	1 vs 2	-0.182107	-0.123316	Thap2:ENSMUST00000020346.5, Thap2:ENSMUST00000218989.1	Thap2	0.0432383	0.0762973	FALSE	FALSE	0.048763	0.0803931	FALSE
812	0.155481	0.310026	0.819305	0.849188	-0.0298833	TRUE	-0.216602	2 vs 1	-0.0597665	2 vs 1	0.638609	0.698376	Fer:ENSMUST00000232945.1, Fer:ENSMUST00000233190.1	Fer	NA	NA	FALSE	FALSE	0.310026	NA	FALSE
813	0.893048	NA	0.672727	0.702703	-0.0299754	TRUE	-0.139655	1 vs 2	-0.0599509	1 vs 2	0.345455	0.405405	Trim65:ENSMUST00000106440.8, Trim65:ENSMUST00000067632.3	Trim65	NA	NA	FALSE	FALSE	0.893048	NA	FALSE
814	8.29278e-23	5.97909e-22	0.730062	0.760277	-0.030215	FALSE	-0.159261	1 vs 2	-0.0604299	1 vs 2	0.460124	0.520554	Snrpe:ENSMUST00000166291.7, Snrpe:ENSMUST00000164574.1	Snrpe	4.59872e-22	3.61735e-21	FALSE	FALSE	5.97909e-22	3.64724e-21	FALSE
815	0.0156852	0.0187523	0.820647	0.850909	-0.0302626	FALSE	-0.221015	1 vs 2	-0.0605252	1 vs 2	0.641293	0.701818	Cmss1:ENSMUST00000114371.4, Cmss1:ENSMUST00000232413.1	Cmss1	0.0275999	0.0321089	FALSE	FALSE	0.0187523	0.0344891	FALSE
816	6.35227e-06	2.99711e-05	0.749285	0.78	-0.0307146	FALSE	-0.170862	1 vs 2	-0.0614292	1 vs 2	0.498571	0.56	Rsrc2:ENSMUST00000050827.13, Rsrc2:ENSMUST00000111515.7	Rsrc2	1.69762e-05	7.71597e-05	FALSE	FALSE	2.99711e-05	8.00688e-05	FALSE
817	0.00380246	3.73737e-05	0.484372	0.515128	-0.0307557	FALSE	-0.123062	2 vs 1	-0.0615114	2 vs 1	-0.0312554	0.030256	Gabbr1:ENSMUST00000174456.7, Gabbr1:ENSMUST00000025338.15	Gabbr1	0.00728639	9.48718e-05	FALSE	FALSE	0.00380246	0.00786272	FALSE
818	0.0132307	0.0433301	0.721366	0.752336	-0.0309702	FALSE	-0.159864	1 vs 2	-0.0619405	1 vs 2	0.442732	0.504673	Brd8:ENSMUST00000003876.9, Brd8:ENSMUST00000115765.1	Brd8	0.0235069	0.0692899	FALSE	FALSE	0.0433301	0.0734204	FALSE
819	0.230009	NA	0.457672	0.466495	-0.00882289	TRUE	-0.554704	1 vs 2	-0.0627502	1 vs 2	-0.794709	-0.731959	Zfp287:ENSMUST00000150336.7, Zfp287:ENSMUST00000185656.6, Zfp287:ENSMUST00000128370.1	Zfp287	NA	NA	FALSE	FALSE	0.230009	NA	FALSE
820	0.170721	NA	0.95136	0.983333	-0.0319731	TRUE	-1.10409	1 vs 2	-0.0639461	1 vs 2	0.902721	0.966667	Adam22:ENSMUST00000088761.10, Adam22:ENSMUST00000115385.1	Adam22	NA	NA	FALSE	FALSE	0.170721	NA	FALSE
821	0.0279292	0.0558808	0.899821	0.931889	-0.0320674	TRUE	-0.420829	2 vs 1	-0.0641349	2 vs 1	0.799642	0.863777	Dennd6a:ENSMUST00000203874.2, Dennd6a:ENSMUST00000037585.8	Dennd6a	NA	NA	FALSE	FALSE	0.0558808	NA	FALSE
822	0.0446202	0.095371	0.813275	0.845372	-0.0320977	TRUE	-0.527242	2 vs 3	-0.0641953	1 vs 3	0.62655	0.690745	Txndc16:ENSMUST00000139526.8, Txndc16:ENSMUST00000147853.7, Txndc16:ENSMUST00000153383.7	Txndc16	NA	NA	FALSE	FALSE	0.095371	NA	FALSE
823	0.00782614	0.0156909	0.312546	0.344713	-0.0321674	FALSE	-0.145884	1 vs 2	-0.0643348	1 vs 2	-0.374909	-0.310574	Alkbh1:ENSMUST00000162961.7, Alkbh1:ENSMUST00000185301.1	Alkbh1	0.0144665	0.0277844	FALSE	FALSE	0.0156909	0.0299108	FALSE
824	0.450806	NA	0.661765	0.693939	-0.0321747	TRUE	-0.147433	1 vs 2	-0.0643494	1 vs 2	0.323529	0.387879	Gabpb2:ENSMUST00000107209.7, Gabpb2:ENSMUST00000107204.7	Gabpb2	NA	NA	FALSE	FALSE	0.450806	NA	FALSE
825	5.57632e-11	5.1207e-11	0.91421	0.943728	-0.0295173	FALSE	-1.46527	2 vs 1	-0.0648339	2 vs 1	-0.0211063	0.0437276	Trak1:ENSMUST00000211439.1, Trak1:ENSMUST00000211187.1, Trak1:ENSMUST00000210798.2	Trak1	2.02073e-10	1.8548e-10	FALSE	FALSE	5.57632e-11	2.10406e-10	FALSE
826	0.478851	NA	0.8861	0.918605	-0.0325043	TRUE	-0.372025	2 vs 1	-0.0650085	2 vs 1	0.772201	0.837209	Per1:ENSMUST00000101004.8, Per1:ENSMUST00000021271.13	Per1	NA	NA	FALSE	FALSE	0.478851	NA	FALSE
827	0.0283662	0.101539	0.173188	0.205919	-0.0327305	FALSE	-0.213494	2 vs 1	-0.0654611	2 vs 1	-0.653624	-0.588163	Ifnar2:ENSMUST00000117836.7, Ifnar2:ENSMUST00000089042.6	Ifnar2	0.0471911	0.144544	FALSE	FALSE	0.101539	0.155495	FALSE
828	0.0790434	0.112152	0.943396	0.97619	-0.0327942	TRUE	-0.900161	1 vs 2	-0.0655885	1 vs 2	0.886792	0.952381	Zfp738:ENSMUST00000137496.9, Zfp738:ENSMUST00000125495.9	Zfp738	NA	NA	FALSE	FALSE	0.112152	NA	FALSE
829	8.59179e-06	4.49334e-06	0.108165	0.141204	-0.033039	FALSE	-0.304298	1 vs 2	-0.066078	1 vs 2	-0.783671	-0.717593	Glod4:ENSMUST00000169701.7, Glod4:ENSMUST00000017430.11	Glod4	2.24614e-05	1.25468e-05	FALSE	FALSE	8.59179e-06	2.45671e-05	FALSE
830	1	NA	0.966667	1	-0.0333333	TRUE	#NAME?	1 vs 2	-0.0666667	1 vs 2	0.933333	1	Ldb3:ENSMUST00000022327.12, Ldb3:ENSMUST00000227819.1	Ldb3	NA	NA	FALSE	FALSE	1	NA	FALSE
831	0.0290743	0.0288422	0.595861	0.630453	-0.0345917	FALSE	-0.145911	2 vs 1	-0.0691834	2 vs 1	0.191722	0.260905	Capn10:ENSMUST00000117814.7, Capn10:ENSMUST00000027488.10	Capn10	0.0481503	0.0482476	FALSE	FALSE	0.0290743	0.0516563	FALSE
832	0.182148	NA	0.879822	0.91453	-0.034708	TRUE	-0.379498	2 vs 1	-0.0694159	2 vs 1	0.759644	0.82906	Tmco6:ENSMUST00000237870.1, Tmco6:ENSMUST00000007046.8	Tmco6	NA	NA	FALSE	FALSE	0.182148	NA	FALSE
833	0.114902	NA	0.951768	0.986486	-0.034718	TRUE	-1.30815	2 vs 1	-0.069436	2 vs 1	0.903537	0.972973	Grk5:ENSMUST00000236876.1, Grk5:ENSMUST00000003313.9	Grk5	NA	NA	FALSE	FALSE	0.114902	NA	FALSE
834	0.208335	NA	0.813765	0.848993	-0.0352281	TRUE	-0.252063	1 vs 2	-0.0704562	1 vs 2	0.62753	0.697987	Dclre1b:ENSMUST00000063502.12, Dclre1b:ENSMUST00000106832.1	Dclre1b	NA	NA	FALSE	FALSE	0.208335	NA	FALSE
835	0.0279824	0.0135657	0.851048	0.886364	-0.0353157	FALSE	-0.31128	2 vs 1	-0.0706315	2 vs 1	0.702096	0.772727	R3hdm1:ENSMUST00000187900.6, R3hdm1:ENSMUST00000036288.10	R3hdm1	0.0467652	0.0242579	FALSE	FALSE	0.0279824	0.0499589	FALSE
836	0.000252299	0.00462378	0.446416	0.436325	0.0100903	FALSE	0.351024	4 vs 1	-0.0713575	3 vs 2	-0.253176	-0.181818	Cdc37l1:ENSMUST00000224599.1, Cdc37l1:ENSMUST00000225210.1, Cdc37l1:ENSMUST00000050148.4, Cdc37l1:ENSMUST00000224511.1	Cdc37l1	0.000570008	0.00912191	FALSE	FALSE	0.00462378	0.00945421	FALSE
837	0.188247	0.0834616	0.734839	0.770642	-0.0358032	TRUE	-0.192627	2 vs 1	-0.0716064	2 vs 1	0.469678	0.541284	Entpd4:ENSMUST00000184314.7, Entpd4:ENSMUST00000184973.7	Entpd4	NA	NA	FALSE	FALSE	0.188247	NA	FALSE
838	0.188247	0.0834616	0.734839	0.770642	-0.0358032	TRUE	-0.192627	2 vs 1	-0.0716064	2 vs 1	0.469678	0.541284	Entpd4b:ENSMUST00000064846.7, Entpd4b:ENSMUST00000185072.7	Entpd4b	NA	NA	FALSE	FALSE	0.188247	NA	FALSE
839	0.838973	NA	0.117647	0.153846	-0.0361991	TRUE	-0.310155	2 vs 1	-0.0723982	2 vs 1	-0.764706	-0.692308	Sfmbt2:ENSMUST00000114862.7, Sfmbt2:ENSMUST00000041105.6	Sfmbt2	NA	NA	FALSE	FALSE	0.838973	NA	FALSE
840	0.325777	0.581802	0.765854	0.802083	-0.0362297	TRUE	-0.214322	1 vs 2	-0.0724593	1 vs 2	0.531707	0.604167	Flvcr1:ENSMUST00000085635.5, Flvcr1:ENSMUST00000191946.1	Flvcr1	NA	NA	FALSE	FALSE	0.581802	NA	FALSE
841	6.01084e-06	9.30247e-06	0.921218	0.958123	-0.0369052	FALSE	-0.671227	1 vs 2	-0.0738104	1 vs 2	0.842435	0.916245	Calcoco1:ENSMUST00000023818.10, Calcoco1:ENSMUST00000171838.1	Calcoco1	1.6296e-05	2.53894e-05	FALSE	FALSE	9.30247e-06	2.619e-05	FALSE
842	0.545624	NA	0.781915	0.819048	-0.0371327	TRUE	-0.233048	1 vs 2	-0.0742655	1 vs 2	0.56383	0.638095	Sbno2:ENSMUST00000219260.1, Sbno2:ENSMUST00000217972.1	Sbno2	NA	NA	FALSE	FALSE	0.545624	NA	FALSE
843	1	NA	0.647059	0.684211	-0.0371517	TRUE	-0.167054	2 vs 1	-0.0743034	2 vs 1	0.294118	0.368421	Ttc41:ENSMUST00000217747.1, Ttc41:ENSMUST00000075632.13	Ttc41	NA	NA	FALSE	FALSE	1	NA	FALSE
844	0.000534935	0.00155927	0.887462	0.924632	-0.0371708	FALSE	-0.441947	2 vs 1	-0.0743415	2 vs 1	0.774923	0.849265	Rspry1:ENSMUST00000121101.1, Rspry1:ENSMUST00000060389.9	Rspry1	0.0011585	0.00329077	FALSE	FALSE	0.00155927	0.00347982	FALSE
845	0.149503	0.325373	0.615616	0.65338	-0.0377639	TRUE	-0.162948	1 vs 2	-0.0755279	1 vs 2	0.231231	0.306759	Aldh16a1:ENSMUST00000209963.1, Aldh16a1:ENSMUST00000107815.3	Aldh16a1	NA	NA	FALSE	FALSE	0.325373	NA	FALSE
846	9.02094e-05	9.32423e-05	0.939074	0.976996	-0.0379224	FALSE	-1.01359	1 vs 2	-0.0758449	1 vs 2	0.878147	0.953992	Pelp1:ENSMUST00000019065.9, Pelp1:ENSMUST00000135148.1	Pelp1	0.000217215	0.000231828	FALSE	FALSE	9.32423e-05	0.000238648	FALSE
847	0.00343456	0.0118736	0.751702	0.789801	-0.0380993	FALSE	-0.216018	2 vs 1	-0.0761986	2 vs 1	0.503403	0.579602	Pias2:ENSMUST00000114776.3, Pias2:ENSMUST00000114777.9	Pias2	0.00665105	0.0215505	FALSE	FALSE	0.0118736	0.0231156	FALSE
848	0.00153668	0.00090448	0.270719	0.308824	-0.0381042	FALSE	-0.185351	2 vs 1	-0.0762084	2 vs 1	-0.458561	-0.382353	Smc6:ENSMUST00000218866.1, Smc6:ENSMUST00000020931.5	Smc6	0.00317755	0.00197787	FALSE	FALSE	0.00153668	0.00345047	FALSE
849	0.0544716	0.196166	0.348197	0.386724	-0.038527	TRUE	-0.16587	1 vs 2	-0.0770541	1 vs 2	-0.303605	-0.226551	Zmym3:ENSMUST00000117901.7, Zmym3:ENSMUST00000117637.7	Zmym3	NA	NA	FALSE	FALSE	0.196166	NA	FALSE
850	0.541904	NA	0.851852	0.890625	-0.0387731	TRUE	-0.347941	2 vs 1	-0.0775463	2 vs 1	0.703704	0.78125	Cnbd2:ENSMUST00000073942.11, Cnbd2:ENSMUST00000109580.1	Cnbd2	NA	NA	FALSE	FALSE	0.541904	NA	FALSE
851	0.0855151	NA	0.91623	0.955224	-0.0389935	TRUE	-0.668074	2 vs 1	-0.077987	2 vs 1	0.832461	0.910448	Gins3:ENSMUST00000212434.1, Gins3:ENSMUST00000034094.10	Gins3	NA	NA	FALSE	FALSE	0.0855151	NA	FALSE
852	0.438897	NA	0.960894	1	-0.0391061	TRUE	#NAME?	1 vs 2	-0.0782123	1 vs 2	0.921788	1	Tfpi:ENSMUST00000111722.7, Tfpi:ENSMUST00000111711.7	Tfpi	NA	NA	FALSE	FALSE	0.438897	NA	FALSE
853	1	NA	0.666667	0.705882	-0.0392157	TRUE	-0.182322	2 vs 1	-0.0784314	2 vs 1	0.333333	0.411765	Dab2:ENSMUST00000160134.7, Dab2:ENSMUST00000078019.12	Dab2	NA	NA	FALSE	FALSE	1	NA	FALSE
854	0.0213296	0.0286816	0.0346369	0.0740741	-0.0394372	TRUE	-0.801857	1 vs 2	-0.0788744	1 vs 2	-0.930726	-0.851852	Slco3a1:ENSMUST00000098371.8, Slco3a1:ENSMUST00000026897.13	Slco3a1	NA	NA	FALSE	FALSE	0.0286816	NA	FALSE
855	1	NA	0.710145	0.75	-0.0398551	TRUE	-0.202524	2 vs 1	-0.0797101	2 vs 1	0.42029	0.5	Car10:ENSMUST00000107861.7, Car10:ENSMUST00000107863.3	Car10	NA	NA	FALSE	FALSE	1	NA	FALSE
856	0.910343	0.871322	0.875	0.914894	-0.0398936	TRUE	-0.428996	1 vs 2	-0.0797872	1 vs 2	0.75	0.829787	Sorbs3:ENSMUST00000227653.1, Sorbs3:ENSMUST00000227929.1	Sorbs3	NA	NA	FALSE	FALSE	0.910343	NA	FALSE
857	3.46184e-08	2.65402e-08	0.0336642	0.0736156	-0.0399514	FALSE	-0.824644	2 vs 1	-0.0799028	2 vs 1	-0.932672	-0.852769	Tor1aip2:ENSMUST00000128941.7, Tor1aip2:ENSMUST00000111757.9	Tor1aip2	1.03855e-07	8.37746e-08	FALSE	FALSE	3.46184e-08	1.11143e-07	FALSE
858	0.504406	NA	0.96	1	-0.04	TRUE	#NAME?	1 vs 2	-0.08	1 vs 2	0.92	1	Cfap69:ENSMUST00000054865.12, Cfap69:ENSMUST00000135252.2	Cfap69	NA	NA	FALSE	FALSE	0.504406	NA	FALSE
859	1	NA	0.181818	0.222222	-0.040404	TRUE	-0.251314	2 vs 1	-0.0808081	2 vs 1	-0.636364	-0.555556	Adamtsl1:ENSMUST00000120678.1, Adamtsl1:ENSMUST00000141889.7	Adamtsl1	NA	NA	FALSE	FALSE	1	NA	FALSE
860	0.222166	0.315336	0.500588	0.541379	-0.0407918	TRUE	-0.163546	2 vs 1	-0.0815835	2 vs 1	0.00117509	0.0827586	Hook2:ENSMUST00000210326.1, Hook2:ENSMUST00000064495.7	Hook2	NA	NA	FALSE	FALSE	0.315336	NA	FALSE
861	1.37795e-42	1.39593e-54	0.935672	0.976464	-0.0407922	FALSE	-1.04815	2 vs 1	-0.0815845	2 vs 1	0.871344	0.952928	Tpm3:ENSMUST00000119158.7, Tpm3:ENSMUST00000118566.7	Tpm3	1.17286e-41	1.49036e-53	FALSE	FALSE	1.37795e-42	1.23007e-41	FALSE
862	0.00107044	0.000676229	0.578315	0.619672	-0.0413567	FALSE	-0.172295	2 vs 1	-0.0827134	2 vs 1	0.156631	0.239344	Ilf3:ENSMUST00000115414.2, Ilf3:ENSMUST00000213518.1	Ilf3	0.00226632	0.00151124	FALSE	FALSE	0.00107044	0.00244864	FALSE
863	1	NA	0.625	0.666667	-0.0416667	TRUE	-0.182322	2 vs 1	-0.0833333	2 vs 1	0.25	0.333333	Spag16:ENSMUST00000113940.3, Spag16:ENSMUST00000065425.11	Spag16	NA	NA	FALSE	FALSE	1	NA	FALSE
864	0.0486402	0.0979566	0.891824	0.933555	-0.0417309	TRUE	-0.533114	1 vs 2	-0.0834618	1 vs 2	0.783648	0.86711	Cdk5rap1:ENSMUST00000109731.7, Cdk5rap1:ENSMUST00000109730.2	Cdk5rap1	NA	NA	FALSE	FALSE	0.0979566	NA	FALSE
865	0.521214	NA	0.863732	0.90566	-0.0419287	TRUE	-0.415127	1 vs 2	-0.0838574	1 vs 2	0.727463	0.811321	Lrch1:ENSMUST00000088970.6, Lrch1:ENSMUST00000226799.1	Lrch1	NA	NA	FALSE	FALSE	0.521214	NA	FALSE
866	0.117132	0.149506	0.887446	0.929412	-0.0419659	TRUE	-0.512775	2 vs 1	-0.0839318	2 vs 1	0.774892	0.858824	Dlgap1:ENSMUST00000146730.8, Dlgap1:ENSMUST00000133983.7	Dlgap1	NA	NA	FALSE	FALSE	0.149506	NA	FALSE
867	1.30034e-05	1.08312e-05	0.771375	0.813682	-0.0423069	FALSE	-0.258023	1 vs 2	-0.0846138	1 vs 2	0.54275	0.627364	Ncor1:ENSMUST00000101066.9, Ncor1:ENSMUST00000069456.10	Ncor1	3.32815e-05	2.93412e-05	FALSE	FALSE	1.30034e-05	3.55168e-05	FALSE
868	0.461599	0.62186	0.75566	0.785366	-0.0297055	TRUE	-0.230968	1 vs 2	-0.0865163	1 vs 2	0.362264	0.44878	Akap10:ENSMUST00000102650.9, Akap10:ENSMUST00000058173.11, Akap10:ENSMUST00000108710.1	Akap10	NA	NA	FALSE	FALSE	0.62186	NA	FALSE
869	0.981284	NA	0.264368	0.307692	-0.0433245	TRUE	-0.212459	2 vs 1	-0.086649	2 vs 1	-0.471264	-0.384615	Tshz2:ENSMUST00000109157.1, Tshz2:ENSMUST00000109159.2	Tshz2	NA	NA	FALSE	FALSE	0.981284	NA	FALSE
870	0.536187	NA	0.611722	0.655556	-0.0438339	TRUE	-0.188996	2 vs 1	-0.0876679	2 vs 1	0.223443	0.311111	Stat1:ENSMUST00000186574.6, Stat1:ENSMUST00000070968.13	Stat1	NA	NA	FALSE	FALSE	0.536187	NA	FALSE
871	3.26113e-10	3.65231e-08	0.261808	0.276125	-0.0143172	FALSE	-0.490071	3 vs 2	-0.0883389	3 vs 2	-0.214972	-0.126633	Ppm1b:ENSMUST00000080217.13, Ppm1b:ENSMUST00000112304.9, Ppm1b:ENSMUST00000234540.1	Ppm1b	1.09502e-09	1.14292e-07	FALSE	FALSE	3.65231e-08	1.16239e-07	FALSE
872	8.56897e-26	8.86534e-19	0.0119288	0.0569705	-0.0450417	FALSE	-1.61024	1 vs 2	-0.0900834	1 vs 2	-0.976142	-0.886059	Zdhhc3:ENSMUST00000238520.1, Zdhhc3:ENSMUST00000147563.8	Zdhhc3	5.60043e-25	4.73253e-18	FALSE	FALSE	8.86534e-19	4.84286e-18	FALSE
873	0.000571276	0.00357711	0.767347	0.812417	-0.0450696	FALSE	-0.272399	2 vs 1	-0.0901392	2 vs 1	0.534694	0.624833	Usp19:ENSMUST00000006854.12, Usp19:ENSMUST00000166103.8	Usp19	0.00122992	0.00721385	FALSE	FALSE	0.00357711	0.00743877	FALSE
874	0.184095	NA	0.81201	0.857143	-0.0451324	TRUE	-0.328633	1 vs 2	-0.0902648	1 vs 2	0.624021	0.714286	Tfcp2:ENSMUST00000229696.1, Tfcp2:ENSMUST00000229581.1	Tfcp2	NA	NA	FALSE	FALSE	0.184095	NA	FALSE
875	0.0401621	NA	0.926594	0.97191	-0.0453156	TRUE	-1.00834	1 vs 2	-0.0906313	1 vs 2	0.853189	0.94382	P4htm:ENSMUST00000006853.10, P4htm:ENSMUST00000193621.1	P4htm	NA	NA	FALSE	FALSE	0.0401621	NA	FALSE
876	9.82321e-05	0.000663344	0.921273	0.96662	-0.0453473	TRUE	-0.906087	2 vs 1	-0.0906945	2 vs 1	0.842546	0.933241	Jade1:ENSMUST00000191952.1, Jade1:ENSMUST00000026865.14	Jade1	NA	NA	FALSE	FALSE	0.000663344	NA	FALSE
877	0.082955	0.335261	0.216071	0.261947	-0.0458755	TRUE	-0.252835	1 vs 2	-0.0917509	1 vs 2	-0.567857	-0.476106	Tinf2:ENSMUST00000227842.1, Tinf2:ENSMUST00000007733.7	Tinf2	NA	NA	FALSE	FALSE	0.335261	NA	FALSE
878	5.35423e-14	6.3181e-13	0.449975	0.478491	-0.0285155	FALSE	-1.14605	2 vs 1	-0.0924321	2 vs 1	-0.515563	-0.423131	Rint1:ENSMUST00000120869.5, Rint1:ENSMUST00000117783.7, Rint1:ENSMUST00000030852.12	Rint1	2.13005e-13	2.4929e-12	FALSE	FALSE	6.3181e-13	2.56936e-12	FALSE
879	0.38072	0.602401	0.716867	0.763636	-0.0467689	TRUE	-0.243744	1 vs 2	-0.0935378	1 vs 2	0.433735	0.527273	Fam228b:ENSMUST00000219898.1, Fam228b:ENSMUST00000053458.6	Fam228b	NA	NA	FALSE	FALSE	0.602401	NA	FALSE
880	0.130278	0.0245458	0.600577	0.64881	-0.048232	TRUE	-0.205939	2 vs 1	-0.0964641	2 vs 1	0.201155	0.297619	Agps:ENSMUST00000111952.8, Agps:ENSMUST00000047232.13	Agps	NA	NA	FALSE	FALSE	0.130278	NA	FALSE
881	1.34967e-09	2.22277e-10	0.76357	0.782022	-0.0184524	FALSE	-1.13899	2 vs 3	-0.0967039	2 vs 3	0.2606	0.357303	Synj2bp:ENSMUST00000163402.7, Synj2bp:ENSMUST00000114201.2, Synj2bp:ENSMUST00000164431.1	Synj2bp	4.35783e-09	7.54081e-10	FALSE	FALSE	1.34967e-09	4.61662e-09	FALSE
882	0.0699141	0.145999	0.751613	0.801105	-0.0494921	TRUE	-0.285982	2 vs 1	-0.0989841	2 vs 1	0.503226	0.60221	Asb1:ENSMUST00000188081.6, Asb1:ENSMUST00000027538.8	Asb1	NA	NA	FALSE	FALSE	0.145999	NA	FALSE
883	0.359462	NA	0.415929	0.465608	-0.0496793	TRUE	-0.201723	2 vs 1	-0.0993585	2 vs 1	-0.168142	-0.0687831	Ggnbp1:ENSMUST00000142141.2, Ggnbp1:ENSMUST00000236222.1	Ggnbp1	NA	NA	FALSE	FALSE	0.359462	NA	FALSE
884	0.284626	NA	0.85022	0.90099	-0.0507698	TRUE	-0.471945	2 vs 1	-0.10154	2 vs 1	0.700441	0.80198	Kdm5d:ENSMUST00000189069.6, Kdm5d:ENSMUST00000055032.13	Kdm5d	NA	NA	FALSE	FALSE	0.284626	NA	FALSE
885	0.35007	NA	0.78972	0.841584	-0.0518645	TRUE	-0.346826	2 vs 1	-0.103729	2 vs 1	0.579439	0.683168	Slc38a6:ENSMUST00000153941.7, Slc38a6:ENSMUST00000140523.7	Slc38a6	NA	NA	FALSE	FALSE	0.35007	NA	FALSE
886	1	NA	0.847826	0.9	-0.0521739	TRUE	-0.479573	1 vs 2	-0.104348	1 vs 2	0.695652	0.8	Arl5c:ENSMUST00000042971.15, Arl5c:ENSMUST00000107563.1	Arl5c	NA	NA	FALSE	FALSE	1	NA	FALSE
887	0.0116042	0.0519618	0.857143	0.909976	-0.0528328	TRUE	-0.521578	2 vs 1	-0.105666	2 vs 1	0.714286	0.819951	Nup188:ENSMUST00000138666.7, Nup188:ENSMUST00000064447.11	Nup188	NA	NA	FALSE	FALSE	0.0519618	NA	FALSE
888	0.248817	0.273317	0.723618	0.778325	-0.054707	TRUE	-0.293452	1 vs 2	-0.109414	1 vs 2	0.447236	0.55665	Pml:ENSMUST00000135310.7, Pml:ENSMUST00000153820.7	Pml	NA	NA	FALSE	FALSE	0.273317	NA	FALSE
889	0.655055	NA	0.805556	0.861111	-0.0555556	TRUE	-0.403164	2 vs 1	-0.111111	2 vs 1	0.611111	0.722222	Zfp967:ENSMUST00000238365.1, Zfp967:ENSMUST00000178443.1	Zfp967	NA	NA	FALSE	FALSE	0.655055	NA	FALSE
890	1.93576e-05	NA	0.885673	0.902857	-0.0171842	TRUE	-2.14203	2 vs 3	-0.111135	2 vs 3	-0.0882779	0.0228571	Tctn3:ENSMUST00000025981.14, Tctn3:ENSMUST00000135795.7, Tctn3:ENSMUST00000132452.1	Tctn3	NA	NA	FALSE	FALSE	1.93576e-05	NA	FALSE
891	8.00175e-06	6.31143e-06	0.922448	0.927718	-0.00526972	FALSE	1.26113	3 vs 2	-0.11229	4 vs 3	0.70133	0.81362	Homer1:ENSMUST00000102752.9, Homer1:ENSMUST00000109492.8, Homer1:ENSMUST00000109494.7, Homer1:ENSMUST00000079086.7	Homer1	2.10694e-05	1.74889e-05	FALSE	FALSE	8.00175e-06	2.30602e-05	FALSE
892	0.227687	NA	0.515439	0.572193	-0.0567531	TRUE	-0.229025	2 vs 1	-0.113506	2 vs 1	0.0308789	0.144385	Aste1:ENSMUST00000176940.2, Aste1:ENSMUST00000035181.9	Aste1	NA	NA	FALSE	FALSE	0.227687	NA	FALSE
893	0.242653	0.232578	0.790993	0.834239	-0.0432461	TRUE	-0.516483	1 vs 3	-0.113905	1 vs 2	0.337182	0.451087	Ern1:ENSMUST00000001059.8, Ern1:ENSMUST00000106801.7, Ern1:ENSMUST00000106799.1	Ern1	NA	NA	FALSE	FALSE	0.242653	NA	FALSE
894	1	NA	0.942564	1	-0.0574359	TRUE	#NAME?	1 vs 2	-0.114872	1 vs 2	0.885128	1	Kcnma1:ENSMUST00000145596.2, Kcnma1:ENSMUST00000190339.1	Kcnma1	NA	NA	FALSE	FALSE	1	NA	FALSE
895	1	NA	0.94228	1	-0.0577201	TRUE	#NAME?	2 vs 1	-0.11544	2 vs 1	0.88456	1	Thy1:ENSMUST00000214627.1, Thy1:ENSMUST00000114840.1	Thy1	NA	NA	FALSE	FALSE	1	NA	FALSE
896	0.137161	0.271193	0.468433	0.511364	-0.0429307	TRUE	-0.355797	1 vs 2	-0.115532	1 vs 2	-0.0473506	0.0681818	Letm2:ENSMUST00000079160.7, Letm2:ENSMUST00000210810.1, Letm2:ENSMUST00000210616.1	Letm2	NA	NA	FALSE	FALSE	0.271193	NA	FALSE
897	8.69143e-10	1.9178e-10	0.902669	0.960684	-0.058015	FALSE	-0.968772	2 vs 1	-0.11603	2 vs 1	0.805338	0.921368	Eif2d:ENSMUST00000112446.8, Eif2d:ENSMUST00000068805.13	Eif2d	2.86582e-09	6.56755e-10	FALSE	FALSE	8.69143e-10	3.001e-09	FALSE
898	0.0165361	NA	0.916894	0.975	-0.0581063	TRUE	-1.26269	2 vs 1	-0.116213	2 vs 1	0.833787	0.95	Mlxip:ENSMUST00000111596.7, Mlxip:ENSMUST00000068237.11	Mlxip	NA	NA	FALSE	FALSE	0.0165361	NA	FALSE
899	0.068974	NA	0.905838	0.963964	-0.0581259	TRUE	-1.02269	1 vs 2	-0.116252	1 vs 2	0.811676	0.927928	Fnbp1:ENSMUST00000073879.11, Fnbp1:ENSMUST00000113552.8	Fnbp1	NA	NA	FALSE	FALSE	0.068974	NA	FALSE
900	1.2794e-20	6.02319e-20	0.907721	0.96593	-0.0582091	FALSE	-1.05856	1 vs 2	-0.116418	1 vs 2	0.815443	0.931861	Hnrnpul1:ENSMUST00000206832.1, Hnrnpul1:ENSMUST00000108401.2	Hnrnpul1	6.88616e-20	3.41628e-19	FALSE	FALSE	6.02319e-20	3.44451e-19	FALSE
901	0.422388	NA	0.362245	0.420455	-0.0582096	TRUE	-0.244726	1 vs 2	-0.116419	1 vs 2	-0.27551	-0.159091	Usp53:ENSMUST00000090379.6, Usp53:ENSMUST00000197314.4	Usp53	NA	NA	FALSE	FALSE	0.422388	NA	FALSE
902	0.000528402	0.00411149	0.358685	0.416963	-0.0582785	TRUE	-0.450011	3 vs 2	-0.116557	3 vs 1	-0.282631	-0.166074	Khdrbs2:ENSMUST00000189878.1, Khdrbs2:ENSMUST00000185666.1, Khdrbs2:ENSMUST00000027226.11	Khdrbs2	NA	NA	FALSE	FALSE	0.00411149	NA	FALSE
903	1	NA	0.941176	1	-0.0588235	TRUE	#NAME?	2 vs 1	-0.117647	2 vs 1	0.882353	1	Cfap58:ENSMUST00000238163.1, Cfap58:ENSMUST00000066308.8	Cfap58	NA	NA	FALSE	FALSE	1	NA	FALSE
904	1	NA	0.857143	0.916667	-0.0595238	TRUE	-0.606136	1 vs 2	-0.119048	1 vs 2	0.714286	0.833333	Gfap:ENSMUST00000067444.9, Gfap:ENSMUST00000077902.4	Gfap	NA	NA	FALSE	FALSE	1	NA	FALSE
905	7.55339e-10	1.01733e-09	0.868842	0.928541	-0.0596987	TRUE	-0.673728	1 vs 2	-0.119397	1 vs 2	0.737684	0.857081	Palld:ENSMUST00000121200.8, Palld:ENSMUST00000034057.13	Palld	NA	NA	FALSE	FALSE	1.01733e-09	NA	FALSE
906	2.83714e-10	1.4662e-09	0.476331	0.536705	-0.0603745	FALSE	-0.241833	2 vs 1	-0.120749	2 vs 1	-0.0473381	0.0734109	Mthfd2l:ENSMUST00000202781.1, Mthfd2l:ENSMUST00000071652.5	Mthfd2l	9.61475e-10	4.79487e-09	FALSE	FALSE	1.4662e-09	4.96879e-09	FALSE
907	0.000780051	0.0600969	0.558302	0.619134	-0.0608311	TRUE	-0.251597	1 vs 2	-0.121662	1 vs 2	0.116605	0.238267	Cep68:ENSMUST00000050611.13, Cep68:ENSMUST00000162811.1	Cep68	NA	NA	FALSE	FALSE	0.0600969	NA	FALSE
908	0.0233351	NA	0.907407	0.968354	-0.060947	TRUE	-1.13862	2 vs 1	-0.121894	2 vs 1	0.814815	0.936709	Mocs1:ENSMUST00000165390.8, Mocs1:ENSMUST00000024797.15	Mocs1	NA	NA	FALSE	FALSE	0.0233351	NA	FALSE
909	0.00301456	0.00131594	0.47362	0.534643	-0.0610236	TRUE	-0.244415	2 vs 1	-0.122047	2 vs 1	-0.0527607	0.0692865	Odf2:ENSMUST00000113767.7, Odf2:ENSMUST00000046571.13	Odf2	NA	NA	FALSE	FALSE	0.00301456	NA	FALSE
910	0.0211517	0.0190524	0.437016	0.499089	-0.0620737	TRUE	-0.24964	1 vs 2	-0.124147	1 vs 2	-0.125969	-0.00182149	Mbd4:ENSMUST00000032469.12, Mbd4:ENSMUST00000122816.2	Mbd4	NA	NA	FALSE	FALSE	0.0211517	NA	FALSE
911	0.00455825	0.0255442	0.710879	0.773694	-0.0628157	TRUE	-0.329635	2 vs 1	-0.125631	2 vs 1	0.421757	0.547389	Afdn:ENSMUST00000137708.7, Afdn:ENSMUST00000139666.7	Afdn	NA	NA	FALSE	FALSE	0.0255442	NA	FALSE
912	1	NA	0.436782	0.5	-0.0632184	TRUE	-0.254234	1 vs 2	-0.126437	1 vs 2	-0.126437	0	Trpm2:ENSMUST00000105401.8, Trpm2:ENSMUST00000105399.1	Trpm2	NA	NA	FALSE	FALSE	1	NA	FALSE
913	5.76241e-07	3.60598e-06	0.0208333	0.085034	-0.0642007	TRUE	-1.47431	2 vs 1	-0.128401	2 vs 1	-0.958333	-0.829932	A430033K04Rik:ENSMUST00000069862.10, A430033K04Rik:ENSMUST00000198958.4	A430033K04Rik	NA	NA	FALSE	FALSE	3.60598e-06	NA	FALSE
914	6.60941e-19	1.03423e-15	0.336231	0.400823	-0.0645919	FALSE	-0.278098	1 vs 2	-0.129184	1 vs 2	-0.327538	-0.198354	Dtymk:ENSMUST00000027503.13, Dtymk:ENSMUST00000112890.2	Dtymk	3.45577e-18	5.00567e-15	FALSE	FALSE	1.03423e-15	5.04704e-15	FALSE
915	0.0165038	NA	0.872973	0.940594	-0.0676211	TRUE	-0.834613	2 vs 1	-0.135242	2 vs 1	0.745946	0.881188	Riox2:ENSMUST00000120674.7, Riox2:ENSMUST00000023407.11	Riox2	NA	NA	FALSE	FALSE	0.0165038	NA	FALSE
916	1	NA	0.681818	0.75	-0.0681818	TRUE	-0.336472	1 vs 2	-0.136364	1 vs 2	0.363636	0.5	Efcab9:ENSMUST00000054327.2, Efcab9:ENSMUST00000109377.1	Efcab9	NA	NA	FALSE	FALSE	1	NA	FALSE
917	2.22314e-15	2.37415e-15	0.0675561	0.13654	-0.0689838	FALSE	-0.78052	1 vs 2	-0.137968	1 vs 2	-0.864888	-0.72692	Zfp451:ENSMUST00000019861.12, Zfp451:ENSMUST00000044455.7	Zfp451	9.68652e-15	1.11924e-14	FALSE	FALSE	2.37415e-15	1.12849e-14	FALSE
918	0.0728486	NA	0.663842	0.733577	-0.0697348	TRUE	-0.332383	2 vs 1	-0.13947	2 vs 1	0.327684	0.467153	Specc1:ENSMUST00000049836.13, Specc1:ENSMUST00000108709.7	Specc1	NA	NA	FALSE	FALSE	0.0728486	NA	FALSE
919	5.77756e-15	2.63467e-13	0.479592	0.550102	-0.0705102	FALSE	-0.350152	2 vs 1	-0.14102	3 vs 1	-0.0408163	0.100204	Acbd6:ENSMUST00000080138.12, Acbd6:ENSMUST00000097529.4, Acbd6:ENSMUST00000035560.8	Acbd6	2.40294e-14	1.07459e-12	FALSE	FALSE	2.63467e-13	1.09578e-12	FALSE
920	0.0676258	0.39869	0.585124	0.655738	-0.0706137	TRUE	-0.300513	1 vs 2	-0.141227	1 vs 2	0.170248	0.311475	Txlng:ENSMUST00000041370.10, Txlng:ENSMUST00000112314.7	Txlng	NA	NA	FALSE	FALSE	0.39869	NA	FALSE
921	1	NA	0.178571	0.25	-0.0714286	TRUE	-0.427444	1 vs 2	-0.142857	1 vs 2	-0.642857	-0.5	Ccdc158:ENSMUST00000060930.9, Ccdc158:ENSMUST00000151180.7	Ccdc158	NA	NA	FALSE	FALSE	1	NA	FALSE
922	1.73514e-17	5.05035e-16	0.771876	0.84347	-0.0715943	FALSE	-0.465343	1 vs 2	-0.143189	1 vs 2	0.543751	0.68694	Syncrip:ENSMUST00000069221.11, Syncrip:ENSMUST00000173801.7	Syncrip	8.46751e-17	2.58208e-15	FALSE	FALSE	5.05035e-16	2.60342e-15	FALSE
923	1.79819e-10	6.12741e-13	0.195784	0.267565	-0.0717809	FALSE	-0.405843	1 vs 2	-0.143562	1 vs 2	-0.608431	-0.46487	Fam53b:ENSMUST00000097998.8, Fam53b:ENSMUST00000106166.7	Fam53b	6.32825e-10	2.44423e-12	FALSE	FALSE	1.79819e-10	6.45234e-10	FALSE
924	1.07168e-13	5.84394e-11	0.142886	0.215792	-0.0729058	FALSE	-0.501163	1 vs 2	-0.145812	1 vs 2	-0.714227	-0.568416	Snx12:ENSMUST00000156473.7, Snx12:ENSMUST00000077876.3	Snx12	4.21759e-13	2.07975e-10	FALSE	FALSE	5.84394e-11	2.18253e-10	FALSE
925	2.66753e-103	2.00339e-98	0.634346	0.707257	-0.0729113	FALSE	-0.432104	3 vs 2	-0.145823	3 vs 1	0.268692	0.414514	Nap1l1:ENSMUST00000219143.1, Nap1l1:ENSMUST00000219961.1, Nap1l1:ENSMUST00000065917.15	Nap1l1	4.43779e-102	3.82752e-97	FALSE	FALSE	2.00339e-98	4.07355e-97	FALSE
926	4.65579e-15	5.40642e-14	0.628207	0.702777	-0.0745703	FALSE	-0.336026	2 vs 1	-0.149141	2 vs 1	0.256413	0.405554	Pnisr:ENSMUST00000108229.1, Pnisr:ENSMUST00000098238.8	Pnisr	1.95864e-14	2.36449e-13	FALSE	FALSE	5.40642e-14	2.38403e-13	FALSE
927	0.0894717	NA	0.779006	0.853846	-0.0748406	TRUE	-0.505211	2 vs 1	-0.149681	2 vs 1	0.558011	0.707692	Abcd1:ENSMUST00000114461.2, Abcd1:ENSMUST00000002084.13	Abcd1	NA	NA	FALSE	FALSE	0.0894717	NA	FALSE
928	2.4949e-23	2.18784e-22	0.585542	0.660458	-0.0749153	FALSE	-0.319766	2 vs 1	-0.149831	2 vs 1	0.171085	0.320915	Ak2:ENSMUST00000030583.12, Ak2:ENSMUST00000102604.10	Ak2	1.44942e-22	1.39331e-21	FALSE	FALSE	2.18784e-22	1.40482e-21	FALSE
929	1	NA	0.92437	1	-0.0756303	TRUE	#NAME?	2 vs 1	-0.151261	2 vs 1	0.848739	1	Osbpl10:ENSMUST00000182363.7, Osbpl10:ENSMUST00000182384.7	Osbpl10	NA	NA	FALSE	FALSE	1	NA	FALSE
930	0.402589	0.493511	0.634146	0.710327	-0.0761811	TRUE	-0.346929	1 vs 2	-0.152362	1 vs 2	0.268293	0.420655	Mis18bp1:ENSMUST00000052201.8, Mis18bp1:ENSMUST00000222244.1	Mis18bp1	NA	NA	FALSE	FALSE	0.493511	NA	FALSE
931	0.735596	NA	0.818182	0.894737	-0.076555	TRUE	-0.635989	2 vs 1	-0.15311	2 vs 1	0.636364	0.789474	Pcdh15:ENSMUST00000064562.13, Pcdh15:ENSMUST00000191854.5	Pcdh15	NA	NA	FALSE	FALSE	0.735596	NA	FALSE
932	1.21845e-09	2.5398e-07	0.166817	0.243636	-0.0768197	FALSE	-0.475513	2 vs 1	-0.153639	2 vs 1	-0.666367	-0.512727	Syn2:ENSMUST00000169345.3, Syn2:ENSMUST00000009538.11	Syn2	3.98173e-09	7.68291e-07	FALSE	FALSE	2.5398e-07	7.8115e-07	FALSE
933	0.325583	NA	0.15978	0.236842	-0.0770625	TRUE	-0.489798	1 vs 2	-0.154125	1 vs 2	-0.680441	-0.526316	Cgn:ENSMUST00000107272.6, Cgn:ENSMUST00000153263.8	Cgn	NA	NA	FALSE	FALSE	0.325583	NA	FALSE
934	2.64024e-16	6.22088e-16	0.73456	0.812763	-0.0782031	FALSE	-0.450181	2 vs 1	-0.156406	2 vs 1	0.469119	0.625525	Cacfd1:ENSMUST00000114004.7, Cacfd1:ENSMUST00000114007.7	Cacfd1	1.20791e-15	3.13636e-15	FALSE	FALSE	6.22088e-16	3.16228e-15	FALSE
935	1.12914e-21	2.21637e-18	0.731152	0.809692	-0.0785402	FALSE	-0.447536	2 vs 1	-0.15708	2 vs 1	0.462304	0.619384	Smarcc1:ENSMUST00000197984.4, Smarcc1:ENSMUST00000199896.1	Smarcc1	6.16815e-21	1.14935e-17	FALSE	FALSE	2.21637e-18	1.17564e-17	FALSE
936	0.651882	NA	0.329545	0.409091	-0.0795455	TRUE	-0.342517	1 vs 2	-0.159091	1 vs 2	-0.340909	-0.181818	Klhl33:ENSMUST00000227271.1, Klhl33:ENSMUST00000170855.1	Klhl33	NA	NA	FALSE	FALSE	0.651882	NA	FALSE
937	2.82684e-10	2.85902e-10	0.688761	0.770262	-0.0815016	FALSE	-0.415461	2 vs 1	-0.163003	2 vs 1	0.377522	0.540525	Ppt1:ENSMUST00000121870.7, Ppt1:ENSMUST00000030412.10	Ppt1	9.61475e-10	9.60949e-10	FALSE	FALSE	2.85902e-10	1.00616e-09	FALSE
938	0.00784084	0.0173158	0.521255	0.603175	-0.0819195	TRUE	-0.333639	2 vs 1	-0.163839	2 vs 1	0.0425101	0.206349	Zfp971:ENSMUST00000108925.9, Zfp971:ENSMUST00000108926.2	Zfp971	NA	NA	FALSE	FALSE	0.0173158	NA	FALSE
939	1.35736e-09	1.74695e-08	0.145795	0.228525	-0.0827299	FALSE	-0.55131	2 vs 1	-0.16546	2 vs 1	-0.70841	-0.54295	Cbx1:ENSMUST00000018810.9, Cbx1:ENSMUST00000093943.9	Cbx1	4.35783e-09	5.56264e-08	FALSE	FALSE	1.74695e-08	5.65825e-08	FALSE
940	0.00103307	0.00390136	0.717172	0.8	-0.0828283	TRUE	-0.455819	1 vs 2	-0.165657	1 vs 2	0.434343	0.6	Pola2:ENSMUST00000025752.14, Pola2:ENSMUST00000165143.2	Pola2	NA	NA	FALSE	FALSE	0.00390136	NA	FALSE
941	1.00444e-58	5.93268e-50	0.209706	0.292646	-0.0829402	FALSE	-0.444132	1 vs 2	-0.16588	1 vs 2	-0.580589	-0.414708	Psip1:ENSMUST00000030207.14, Psip1:ENSMUST00000107214.8	Psip1	1.08125e-57	5.82044e-49	FALSE	FALSE	5.93268e-50	6.20389e-49	FALSE
942	2.92785e-18	3.74389e-19	0.664028	0.747291	-0.0832628	FALSE	-0.402918	2 vs 1	-0.166526	2 vs 1	0.328055	0.494581	Tdp2:ENSMUST00000223804.1, Tdp2:ENSMUST00000038039.2	Tdp2	1.48832e-17	2.05914e-18	FALSE	FALSE	2.92785e-18	1.53085e-17	FALSE
943	2.99244e-05	6.43987e-05	0.818374	0.901734	-0.0833603	TRUE	-0.711274	1 vs 2	-0.166721	1 vs 2	0.636748	0.803468	Pecr:ENSMUST00000027381.12, Pecr:ENSMUST00000097698.4	Pecr	NA	NA	FALSE	FALSE	6.43987e-05	NA	FALSE
944	9.10362e-05	0.000947534	0.638316	0.72205	-0.0837335	TRUE	-0.386588	2 vs 1	-0.167467	2 vs 1	0.276632	0.444099	Cds2:ENSMUST00000110158.7, Cds2:ENSMUST00000103181.10	Cds2	NA	NA	FALSE	FALSE	0.000947534	NA	FALSE
945	2.88548e-142	6.0682e-101	0.0268102	0.110862	-0.0840518	FALSE	-1.50983	2 vs 1	-0.168104	2 vs 1	-0.94638	-0.778276	Rufy3:ENSMUST00000031229.10, Rufy3:ENSMUST00000198965.4	Rufy3	8.80072e-141	1.29574e-99	FALSE	FALSE	6.0682e-101	1.30645e-99	FALSE
946	0.0324299	NA	0.721591	0.805687	-0.0840963	TRUE	-0.46986	1 vs 2	-0.168193	1 vs 2	0.443182	0.611374	Katnal2:ENSMUST00000126153.7, Katnal2:ENSMUST00000154665.1	Katnal2	NA	NA	FALSE	FALSE	0.0324299	NA	FALSE
947	2.7003e-09	6.77162e-10	0.497349	0.582413	-0.0850636	FALSE	-0.34329	2 vs 1	-0.170127	2 vs 1	-0.00530223	0.164825	Sorbs2:ENSMUST00000124544.7, Sorbs2:ENSMUST00000067065.13	Sorbs2	8.59401e-09	2.23463e-09	FALSE	FALSE	2.7003e-09	9.06707e-09	FALSE
948	0.411199	NA	0.278351	0.363636	-0.0852858	TRUE	-0.393043	2 vs 1	-0.170572	2 vs 1	-0.443299	-0.272727	Vamp1:ENSMUST00000100942.8, Vamp1:ENSMUST00000063588.10	Vamp1	NA	NA	FALSE	FALSE	0.411199	NA	FALSE
949	1	NA	0.714286	0.8	-0.0857143	TRUE	-0.470004	2 vs 1	-0.171429	2 vs 1	0.428571	0.6	Ikzf1:ENSMUST00000048122.12, Ikzf1:ENSMUST00000076700.10	Ikzf1	NA	NA	FALSE	FALSE	1	NA	FALSE
950	6.9368e-07	1.26295e-05	0.382812	0.469067	-0.0862549	FALSE	-0.353739	1 vs 2	-0.17251	1 vs 2	-0.234375	-0.0618652	Trmt13:ENSMUST00000041524.10, Trmt13:ENSMUST00000198454.1	Trmt13	1.97544e-06	3.37095e-05	FALSE	FALSE	1.26295e-05	3.47547e-05	FALSE
951	0.00211731	0.0342971	0.652855	0.739691	-0.0868362	TRUE	-0.412751	2 vs 1	-0.173672	2 vs 1	0.305709	0.479381	Zfp710:ENSMUST00000206039.1, Zfp710:ENSMUST00000164056.8	Zfp710	NA	NA	FALSE	FALSE	0.0342971	NA	FALSE
952	0.00054571	0.00772011	0.641036	0.728337	-0.0873017	TRUE	-0.406341	1 vs 2	-0.174603	1 vs 2	0.282071	0.456674	Fkbp5:ENSMUST00000079413.10, Fkbp5:ENSMUST00000233291.1	Fkbp5	NA	NA	FALSE	FALSE	0.00772011	NA	FALSE
953	0.00733734	0.00502831	0.785479	0.875536	-0.0900579	TRUE	-1.11861	3 vs 2	-0.180116	3 vs 1	0.570957	0.751073	Mipol1:ENSMUST00000145003.7, Mipol1:ENSMUST00000153137.5, Mipol1:ENSMUST00000123498.7	Mipol1	NA	NA	FALSE	FALSE	0.00733734	NA	FALSE
954	0.0243648	0.0848083	0.2461	0.337349	-0.0912491	TRUE	-0.760956	1 vs 3	-0.182498	1 vs 3	-0.507799	-0.325301	Arpp21:ENSMUST00000070218.11, Arpp21:ENSMUST00000161412.7, Arpp21:ENSMUST00000178410.1	Arpp21	NA	NA	FALSE	FALSE	0.0848083	NA	FALSE
955	0.201207	NA	0.238095	0.329787	-0.091692	TRUE	-0.454003	2 vs 1	-0.183384	2 vs 1	-0.52381	-0.340426	Gprc5c:ENSMUST00000122967.2, Gprc5c:ENSMUST00000053361.11	Gprc5c	NA	NA	FALSE	FALSE	0.201207	NA	FALSE
956	1.77933e-05	0.000111394	0.273099	0.366609	-0.0935108	TRUE	-0.432168	1 vs 2	-0.187022	1 vs 2	-0.453803	-0.266781	Pcf11:ENSMUST00000119954.8, Pcf11:ENSMUST00000208255.1	Pcf11	NA	NA	FALSE	FALSE	0.000111394	NA	FALSE
957	0.192939	NA	0.680723	0.774648	-0.093925	TRUE	-0.477649	2 vs 1	-0.18785	2 vs 1	0.361446	0.549296	Bmp2k:ENSMUST00000112974.5, Bmp2k:ENSMUST00000035635.9	Bmp2k	NA	NA	FALSE	FALSE	0.192939	NA	FALSE
958	5.13874e-126	3.33976e-103	0.85095	0.945979	-0.0950294	FALSE	-1.12078	1 vs 2	-0.190059	1 vs 2	0.7019	0.891959	Ccnd2:ENSMUST00000000188.11, Ccnd2:ENSMUST00000201066.1	Ccnd2	1.25385e-124	7.57707e-102	FALSE	FALSE	3.33976e-103	7.63969e-102	FALSE
959	0.000151864	0.00391727	0.663529	0.705928	-0.0423996	TRUE	-0.404591	3 vs 2	-0.190261	3 vs 2	-0.230823	-0.0405616	Fam149b:ENSMUST00000224930.1, Fam149b:ENSMUST00000224721.1, Fam149b:ENSMUST00000090499.12	Fam149b	NA	NA	FALSE	FALSE	0.00391727	NA	FALSE
960	1.30023e-08	2.39321e-07	0.282541	0.378406	-0.095865	FALSE	-0.435573	1 vs 2	-0.19173	1 vs 2	-0.434919	-0.243189	Cnot4:ENSMUST00000202143.3, Cnot4:ENSMUST00000044163.9	Cnot4	3.99901e-08	7.30029e-07	FALSE	FALSE	2.39321e-07	7.423e-07	FALSE
961	0.00102437	0.00312503	0.363383	0.459391	-0.096008	TRUE	-0.397916	2 vs 1	-0.192016	2 vs 1	-0.273234	-0.0812183	Abhd18:ENSMUST00000203892.1, Abhd18:ENSMUST00000159774.6	Abhd18	NA	NA	FALSE	FALSE	0.00312503	NA	FALSE
962	4.7794e-29	7.4642e-23	0.147366	0.243655	-0.0962891	FALSE	-0.622668	2 vs 1	-0.192578	2 vs 1	-0.705269	-0.51269	Rbbp6:ENSMUST00000098062.8, Rbbp6:ENSMUST00000052135.13	Rbbp6	3.36396e-28	4.92637e-22	FALSE	FALSE	7.4642e-23	4.96709e-22	FALSE
963	3.25893e-08	7.63597e-07	0.662019	0.758475	-0.096456	FALSE	-0.472032	2 vs 1	-0.192912	2 vs 1	0.324037	0.516949	Sun1:ENSMUST00000100517.9, Sun1:ENSMUST00000058716.13	Sun1	9.85758e-08	2.21749e-06	FALSE	FALSE	7.63597e-07	2.27217e-06	FALSE
964	0.000343147	0.00097301	0.586942	0.683486	-0.0965442	TRUE	-0.418502	1 vs 2	-0.193088	1 vs 2	0.173884	0.366972	Slc11a2:ENSMUST00000023774.11, Slc11a2:ENSMUST00000138843.7	Slc11a2	NA	NA	FALSE	FALSE	0.00097301	NA	FALSE
965	7.19649e-24	2.60043e-20	0.681173	0.778123	-0.0969495	FALSE	-0.495591	2 vs 1	-0.193899	2 vs 1	0.362347	0.556246	Copg1:ENSMUST00000049966.5, Copg1:ENSMUST00000113607.9	Copg1	4.38986e-23	1.49834e-19	FALSE	FALSE	2.60043e-20	1.51073e-19	FALSE
966	0.00143144	0.00228761	0.521306	0.61828	-0.096974	TRUE	-0.396978	2 vs 1	-0.193948	2 vs 1	0.0426111	0.236559	Zfp968:ENSMUST00000131676.7, Zfp968:ENSMUST00000109048.2	Zfp968	NA	NA	FALSE	FALSE	0.00228761	NA	FALSE
967	0.000111824	5.91795e-05	0.569109	0.680041	-0.110932	TRUE	-1.70617	5 vs 1	-0.195401	5 vs 1	0.150278	0.345679	Srcap:ENSMUST00000098025.10, Srcap:ENSMUST00000189136.6, Srcap:ENSMUST00000188124.6, Srcap:ENSMUST00000066582.11, Srcap:ENSMUST00000187040.6	Srcap	NA	NA	FALSE	FALSE	0.000111824	NA	FALSE
968	1.10829e-25	6.89275e-22	0.140697	0.238739	-0.0980416	FALSE	-0.649905	1 vs 2	-0.196083	1 vs 2	-0.718606	-0.522523	Med25:ENSMUST00000208253.1, Med25:ENSMUST00000208551.1	Med25	6.99369e-25	4.10175e-21	FALSE	FALSE	6.89275e-22	4.13565e-21	FALSE
969	1	NA	0.733333	0.833333	-0.1	TRUE	-0.597837	1 vs 2	-0.2	1 vs 2	0.466667	0.666667	Ankub1:ENSMUST00000238789.1, Ankub1:ENSMUST00000099091.3	Ankub1	NA	NA	FALSE	FALSE	1	NA	FALSE
970	0.000983109	NA	0.304484	0.404762	-0.100278	TRUE	-0.440374	2 vs 1	-0.200556	2 vs 1	-0.391032	-0.190476	Zfp973:ENSMUST00000121956.7, Zfp973:ENSMUST00000108985.8	Zfp973	NA	NA	FALSE	FALSE	0.000983109	NA	FALSE
971	0.000980627	NA	0.305439	0.40597	-0.100531	TRUE	-0.440878	2 vs 1	-0.201062	2 vs 1	-0.389121	-0.18806	Zfp965:ENSMUST00000109042.9, Zfp965:ENSMUST00000143490.1	Zfp965	NA	NA	FALSE	FALSE	0.000980627	NA	FALSE
972	0.00553738	0.00989187	0.530457	0.560886	-0.0304288	TRUE	-0.528973	1 vs 2	-0.201678	1 vs 2	-0.238579	-0.0369004	Nup98:ENSMUST00000210682.1, Nup98:ENSMUST00000070165.6, Nup98:ENSMUST00000211005.1	Nup98	NA	NA	FALSE	FALSE	0.00989187	NA	FALSE
973	0.785653	NA	0.897959	1	-0.102041	TRUE	#NAME?	2 vs 1	-0.204082	2 vs 1	0.795918	1	Gpnmb:ENSMUST00000031840.9, Gpnmb:ENSMUST00000204260.1	Gpnmb	NA	NA	FALSE	FALSE	0.785653	NA	FALSE
974	0.0306766	NA	0.238281	0.341935	-0.103654	TRUE	-0.507445	2 vs 1	-0.207308	2 vs 1	-0.523438	-0.316129	Intu:ENSMUST00000061590.5, Intu:ENSMUST00000091186.6	Intu	NA	NA	FALSE	FALSE	0.0306766	NA	FALSE
975	0.00819379	0.00255492	0.478448	0.597087	-0.118639	TRUE	-0.870816	1 vs 4	-0.208236	1 vs 4	0.0344828	0.242718	Sfxn5:ENSMUST00000045846.11, Sfxn5:ENSMUST00000059034.12, Sfxn5:ENSMUST00000113788.1, Sfxn5:ENSMUST00000113787.1	Sfxn5	NA	NA	FALSE	FALSE	0.00819379	NA	FALSE
976	0.91283	NA	0.466667	0.571429	-0.104762	TRUE	-0.421213	2 vs 1	-0.209524	2 vs 1	-0.0666667	0.142857	Cabyr:ENSMUST00000186263.1, Cabyr:ENSMUST00000234735.1	Cabyr	NA	NA	FALSE	FALSE	0.91283	NA	FALSE
977	0.0632853	0.202063	0.671233	0.77619	-0.104958	TRUE	-0.529836	2 vs 1	-0.209915	2 vs 1	0.342466	0.552381	Uncx:ENSMUST00000174792.1, Uncx:ENSMUST00000172997.2	Uncx	NA	NA	FALSE	FALSE	0.202063	NA	FALSE
978	7.58888e-12	2.59188e-09	0.13894	0.24422	-0.105279	TRUE	-0.694437	1 vs 2	-0.210559	1 vs 2	-0.72212	-0.511561	Abcc5:ENSMUST00000079158.12, Abcc5:ENSMUST00000096199.4	Abcc5	NA	NA	FALSE	FALSE	2.59188e-09	NA	FALSE
979	8.28526e-07	0.000165872	0.794664	0.900204	-0.10554	TRUE	-0.84622	1 vs 2	-0.21108	1 vs 2	0.589327	0.800407	Slc1a3:ENSMUST00000005493.13, Slc1a3:ENSMUST00000157065.1	Slc1a3	NA	NA	FALSE	FALSE	0.000165872	NA	FALSE
980	6.46832e-09	2.02207e-07	0.795602	0.902439	-0.106837	FALSE	-0.865592	2 vs 1	-0.213674	2 vs 1	0.591204	0.804878	Triobp:ENSMUST00000140228.7, Triobp:ENSMUST00000109690.10	Triobp	2.02342e-08	6.22043e-07	TRUE	TRUE	2.02207e-07	6.32544e-07	TRUE
981	4.85098e-05	NA	0.719752	0.829268	-0.109516	TRUE	-0.63722	2 vs 1	-0.219033	2 vs 1	0.439504	0.658537	Ankzf1:ENSMUST00000127625.2, Ankzf1:ENSMUST00000152233.8	Ankzf1	NA	NA	FALSE	FALSE	4.85098e-05	NA	FALSE
982	0.912163	NA	0.666667	0.776316	-0.109649	TRUE	-0.551177	1 vs 2	-0.219298	1 vs 2	0.333333	0.552632	Cngb1:ENSMUST00000119870.8, Cngb1:ENSMUST00000093268.4	Cngb1	NA	NA	FALSE	FALSE	0.912163	NA	FALSE
983	0.00448634	0.00833772	0.284424	0.350144	-0.0657197	TRUE	-0.482376	2 vs 3	-0.220217	2 vs 3	-0.0790068	0.14121	Pde1c:ENSMUST00000044505.13, Pde1c:ENSMUST00000114327.8, Pde1c:ENSMUST00000166102.7	Pde1c	NA	NA	FALSE	FALSE	0.00833772	NA	FALSE
984	0.224879	0.345365	0.118421	0.228571	-0.11015	TRUE	-0.791073	2 vs 1	-0.220301	2 vs 1	-0.763158	-0.542857	Trim16:ENSMUST00000055006.11, Trim16:ENSMUST00000072639.9	Trim16	NA	NA	FALSE	FALSE	0.345365	NA	FALSE
985	1.86976e-06	NA	0.845382	0.955836	-0.110454	TRUE	-1.37585	1 vs 2	-0.220909	1 vs 2	0.690763	0.911672	Tulp3:ENSMUST00000001562.8, Tulp3:ENSMUST00000157005.2	Tulp3	NA	NA	FALSE	FALSE	1.86976e-06	NA	FALSE
986	0.00061533	NA	0.474504	0.5	-0.0254958	TRUE	Inf	1 vs 2	-0.220963	2 vs 3	0.779037	1	Mfsd4a:ENSMUST00000126927.7, Mfsd4a:ENSMUST00000144548.8, Mfsd4a:ENSMUST00000112365.8	Mfsd4a	NA	NA	FALSE	FALSE	0.00061533	NA	FALSE
987	0.0888607	NA	0.168235	0.27907	-0.110834	TRUE	-0.649105	1 vs 2	-0.221669	1 vs 2	-0.663529	-0.44186	Nin:ENSMUST00000085314.10, Nin:ENSMUST00000220689.1	Nin	NA	NA	FALSE	FALSE	0.0888607	NA	FALSE
988	0.00798894	NA	0.837209	0.948542	-0.111333	TRUE	-1.27655	2 vs 1	-0.222665	2 vs 1	0.674419	0.897084	Jam2:ENSMUST00000098407.2, Jam2:ENSMUST00000114195.7	Jam2	NA	NA	FALSE	FALSE	0.00798894	NA	FALSE
989	0.000474492	0.00241373	0.423923	0.5	-0.076077	TRUE	-1.29059	3 vs 1	-0.224531	2 vs 1	0.522456	0.746988	Slc44a1:ENSMUST00000107646.8, Slc44a1:ENSMUST00000107651.8, Slc44a1:ENSMUST00000102911.9	Slc44a1	NA	NA	FALSE	FALSE	0.00241373	NA	FALSE
990	5.13372e-06	1.88293e-05	0.458748	0.571429	-0.112681	TRUE	-0.453067	1 vs 2	-0.225362	1 vs 2	-0.0825044	0.142857	Ccdc84:ENSMUST00000053286.8, Ccdc84:ENSMUST00000213813.1	Ccdc84	NA	NA	FALSE	FALSE	1.88293e-05	NA	FALSE
991	2.16752e-06	NA	0.811047	0.924569	-0.113522	TRUE	-1.04928	1 vs 2	-0.227045	1 vs 2	0.622093	0.849138	Epb41l5:ENSMUST00000052404.12, Epb41l5:ENSMUST00000191046.6	Epb41l5	NA	NA	FALSE	FALSE	2.16752e-06	NA	FALSE
992	7.93043e-13	9.73204e-08	0.831373	0.945034	-0.113661	TRUE	-1.24912	1 vs 2	-0.227322	1 vs 2	0.662745	0.890068	Cmtm7:ENSMUST00000035009.15, Cmtm7:ENSMUST00000216760.1	Cmtm7	NA	NA	FALSE	FALSE	9.73204e-08	NA	FALSE
993	1.30979e-12	3.75975e-11	0.25201	0.365805	-0.113795	FALSE	-0.537666	1 vs 2	-0.22759	1 vs 2	-0.49598	-0.26839	Armc8:ENSMUST00000035043.11, Armc8:ENSMUST00000185524.6	Armc8	4.99357e-12	1.407e-10	TRUE	TRUE	3.75975e-11	1.4639e-10	TRUE
994	1.21942e-73	3.60954e-66	0.644251	0.759425	-0.115174	FALSE	-0.555664	2 vs 1	-0.230347	2 vs 1	0.288503	0.51885	Fubp1:ENSMUST00000198227.4, Fubp1:ENSMUST00000200524.4	Fubp1	1.65299e-72	4.85282e-65	TRUE	TRUE	3.60954e-66	4.89293e-65	TRUE
995	1.03276e-28	3.87227e-25	0.630713	0.746906	-0.116193	FALSE	-0.546899	2 vs 1	-0.232385	2 vs 1	0.261426	0.493811	Ccdc50:ENSMUST00000039443.13, Ccdc50:ENSMUST00000100026.9	Ccdc50	7.13192e-28	2.65214e-24	TRUE	TRUE	3.87227e-25	2.67406e-24	TRUE
996	0.00188859	NA	0.674556	0.791291	-0.116735	TRUE	-0.603861	2 vs 1	-0.23347	2 vs 1	0.349112	0.582583	Cgrrf1:ENSMUST00000140114.2, Cgrrf1:ENSMUST00000068532.9	Cgrrf1	NA	NA	FALSE	FALSE	0.00188859	NA	FALSE
997	0.0578989	NA	0.0955414	0.212766	-0.117225	TRUE	-0.939444	2 vs 1	-0.234449	2 vs 1	-0.808917	-0.574468	Masp2:ENSMUST00000105701.8, Masp2:ENSMUST00000052060.6	Masp2	NA	NA	FALSE	FALSE	0.0578989	NA	FALSE
998	0.215926	NA	0.471795	0.589744	-0.117949	TRUE	-0.475846	1 vs 2	-0.235897	1 vs 2	-0.0564103	0.179487	Rab26:ENSMUST00000061764.13, Rab26:ENSMUST00000035797.15	Rab26	NA	NA	FALSE	FALSE	0.215926	NA	FALSE
999	0.0249524	NA	0.878092	1	-0.121908	TRUE	#NAME?	2 vs 1	-0.243816	2 vs 1	0.756184	1	Mctp1:ENSMUST00000126960.7, Mctp1:ENSMUST00000125209.7	Mctp1	NA	NA	FALSE	FALSE	0.0249524	NA	FALSE
1000	4.43443e-116	2.51691e-94	0.412056	0.534027	-0.121971	FALSE	-0.491793	2 vs 1	-0.243943	2 vs 1	-0.175889	0.0680543	Polr1d:ENSMUST00000050970.3, Polr1d:ENSMUST00000200993.1	Polr1d	9.01668e-115	4.56819e-93	TRUE	TRUE	2.51691e-94	4.84837e-93	TRUE
1001	3.11091e-117	1.48635e-75	0.03125	0.153316	-0.122066	FALSE	-1.72516	2 vs 1	-0.244131	2 vs 1	-0.9375	-0.693369	Araf:ENSMUST00000122312.7, Araf:ENSMUST00000001155.10	Araf	6.69761e-116	2.07517e-74	TRUE	TRUE	1.48635e-75	2.17601e-74	TRUE
1002	0.00617839	NA	0.819672	0.943299	-0.123627	TRUE	-1.29746	2 vs 1	-0.247254	2 vs 1	0.639344	0.886598	Patj:ENSMUST00000030290.7, Patj:ENSMUST00000238306.1	Patj	NA	NA	FALSE	FALSE	0.00617839	NA	FALSE
1003	0.00488368	NA	0.815126	0.938776	-0.123649	TRUE	-1.24636	2 vs 1	-0.247299	2 vs 1	0.630252	0.877551	Eif2ak4:ENSMUST00000110877.7, Eif2ak4:ENSMUST00000005233.11	Eif2ak4	NA	NA	FALSE	FALSE	0.00488368	NA	FALSE
1004	7.06262e-08	2.10376e-07	0.670183	0.795678	-0.125495	TRUE	-0.650482	1 vs 2	-0.250989	1 vs 2	0.340366	0.591356	Tmem201:ENSMUST00000054459.10, Tmem201:ENSMUST00000103208.1	Tmem201	NA	NA	FALSE	FALSE	2.10376e-07	NA	FALSE
1005	0.340755	0.384537	0.809524	0.935484	-0.12596	TRUE	-1.22723	1 vs 2	-0.25192	1 vs 2	0.619048	0.870968	Nudt12:ENSMUST00000025065.11, Nudt12:ENSMUST00000174122.1	Nudt12	NA	NA	FALSE	FALSE	0.384537	NA	FALSE
1006	6.14487e-80	5.26474e-58	0.070023	0.196545	-0.126522	FALSE	-1.17831	2 vs 1	-0.253045	2 vs 1	-0.859954	-0.606909	Cxadr:ENSMUST00000023572.14, Cxadr:ENSMUST00000114229.3	Cxadr	8.65009e-79	6.16485e-57	TRUE	TRUE	5.26474e-58	6.21579e-57	TRUE
1007	7.50669e-10	1.38173e-09	0.444354	0.573925	-0.129571	TRUE	-0.521394	2 vs 1	-0.259142	2 vs 1	-0.111293	0.147849	Dffa:ENSMUST00000103216.9, Dffa:ENSMUST00000030816.3	Dffa	NA	NA	FALSE	FALSE	1.38173e-09	NA	FALSE
1008	3.80491e-05	0.000107165	0.695863	0.826271	-0.130409	TRUE	-0.731754	2 vs 1	-0.260817	2 vs 1	0.391725	0.652542	Plekha1:ENSMUST00000151119.8, Plekha1:ENSMUST00000120441.7	Plekha1	NA	NA	FALSE	FALSE	0.000107165	NA	FALSE
1009	1.29347e-09	4.75904e-08	0.129101	0.260714	-0.131614	TRUE	-0.866676	2 vs 1	-0.263228	2 vs 1	-0.741799	-0.478571	Map6:ENSMUST00000127492.1, Map6:ENSMUST00000107100.2	Map6	NA	NA	FALSE	FALSE	4.75904e-08	NA	FALSE
1010	0.00118453	0.00930715	0.627286	0.759777	-0.132491	TRUE	-0.630866	2 vs 1	-0.264982	2 vs 1	0.254571	0.519553	Ascc3:ENSMUST00000219226.1, Ascc3:ENSMUST00000035606.9	Ascc3	NA	NA	FALSE	FALSE	0.00930715	NA	FALSE
1011	0.242126	NA	0.26	0.395349	-0.135349	TRUE	-0.621085	2 vs 1	-0.270698	2 vs 1	-0.48	-0.209302	Agbl4:ENSMUST00000080744.12, Agbl4:ENSMUST00000106592.7	Agbl4	NA	NA	FALSE	FALSE	0.242126	NA	FALSE
1012	4.8489e-09	5.04698e-07	0.159582	0.296703	-0.137121	TRUE	-0.798292	2 vs 1	-0.274242	2 vs 1	-0.680835	-0.406593	Alg13:ENSMUST00000070801.10, Alg13:ENSMUST00000238864.1	Alg13	NA	NA	FALSE	FALSE	5.04698e-07	NA	FALSE
1013	0.00303361	NA	0.501931	0.63913	-0.1372	TRUE	-0.56387	1 vs 2	-0.2744	1 vs 2	0.003861	0.278261	Dusp16:ENSMUST00000129433.3, Dusp16:ENSMUST00000149776.2	Dusp16	NA	NA	FALSE	FALSE	0.00303361	NA	FALSE
1014	0.47684	NA	0.509434	0.647059	-0.137625	TRUE	-0.568395	1 vs 2	-0.27525	1 vs 2	0.0188679	0.294118	4930447C04Rik:ENSMUST00000110489.8, 4930447C04Rik:ENSMUST00000136075.7	4930447C04Rik	NA	NA	FALSE	FALSE	0.47684	NA	FALSE
1015	1.45733e-06	0.00101814	0.206939	0.34507	-0.138131	TRUE	-0.746926	1 vs 3	-0.276262	1 vs 3	-0.586121	-0.309859	Zfp931:ENSMUST00000108924.8, Zfp931:ENSMUST00000131702.7, Zfp931:ENSMUST00000108923.1	Zfp931	NA	NA	FALSE	FALSE	0.00101814	NA	FALSE
1016	0.414935	NA	0.794872	0.933333	-0.138462	TRUE	-1.28451	2 vs 1	-0.276923	2 vs 1	0.589744	0.866667	Cntn4:ENSMUST00000113260.7, Cntn4:ENSMUST00000089208.8	Cntn4	NA	NA	FALSE	FALSE	0.414935	NA	FALSE
1017	0.0055138	NA	0.731595	0.732143	-0.000547765	TRUE	1.55814	2 vs 1	-0.27695	3 vs 2	0.294479	0.571429	Dtna:ENSMUST00000047954.14, Dtna:ENSMUST00000221880.1, Dtna:ENSMUST00000220904.1	Dtna	NA	NA	FALSE	FALSE	0.0055138	NA	FALSE
1018	0.011368	0.0265976	0.433566	0.572614	-0.139048	TRUE	-0.559839	1 vs 2	-0.278095	1 vs 2	-0.132867	0.145228	Slc15a2:ENSMUST00000023616.9, Slc15a2:ENSMUST00000168279.1	Slc15a2	NA	NA	FALSE	FALSE	0.0265976	NA	FALSE
1019	2.52934e-36	4.00694e-26	0.0724802	0.213155	-0.140675	FALSE	-1.24319	1 vs 2	-0.281349	1 vs 2	-0.85504	-0.573691	Nectin2:ENSMUST00000075447.13, Nectin2:ENSMUST00000108450.4	Nectin2	1.85148e-35	2.79715e-25	TRUE	TRUE	4.00694e-26	2.87557e-25	TRUE
1020	0.0574945	NA	0.486842	0.489796	-0.00295381	TRUE	0.783298	3 vs 2	-0.285177	2 vs 1	0.184211	0.469388	Matn2:ENSMUST00000226766.1, Matn2:ENSMUST00000228570.1, Matn2:ENSMUST00000022947.6	Matn2	NA	NA	FALSE	FALSE	0.0574945	NA	FALSE
1021	1	NA	0.857143	1	-0.142857	TRUE	#NAME?	2 vs 1	-0.285714	2 vs 1	0.714286	1	Wfdc1:ENSMUST00000212901.1, Wfdc1:ENSMUST00000024107.6	Wfdc1	NA	NA	FALSE	FALSE	1	NA	FALSE
1022	0.000223945	0.000731339	0.70625	0.850242	-0.143992	TRUE	-0.859257	1 vs 2	-0.287983	1 vs 2	0.4125	0.700483	Chpt1:ENSMUST00000117440.7, Chpt1:ENSMUST00000073783.5	Chpt1	NA	NA	FALSE	FALSE	0.000731339	NA	FALSE
1023	0.495907	NA	0.0769231	0.222222	-0.145299	TRUE	-1.23214	2 vs 1	-0.290598	2 vs 1	-0.846154	-0.555556	Lrriq3:ENSMUST00000194376.1, Lrriq3:ENSMUST00000029833.12	Lrriq3	NA	NA	FALSE	FALSE	0.495907	NA	FALSE
1024	0.172337	NA	0.75	0.897436	-0.147436	TRUE	-1.07044	1 vs 2	-0.294872	1 vs 2	0.5	0.794872	Plekha7:ENSMUST00000182834.7, Plekha7:ENSMUST00000181981.7	Plekha7	NA	NA	FALSE	FALSE	0.172337	NA	FALSE
1025	0.558896	NA	0.351064	0.5	-0.148936	TRUE	-0.614366	1 vs 2	-0.297872	1 vs 2	-0.297872	0	Synpo:ENSMUST00000097566.9, Synpo:ENSMUST00000155195.2	Synpo	NA	NA	FALSE	FALSE	0.558896	NA	FALSE
1026	0.000600957	0.0038983	0.545455	0.694915	-0.149461	TRUE	-0.640879	1 vs 2	-0.298921	1 vs 2	0.0909091	0.389831	Net1:ENSMUST00000099946.5, Net1:ENSMUST00000223258.1	Net1	NA	NA	FALSE	FALSE	0.0038983	NA	FALSE
1027	0.0692001	NA	0.424528	0.574074	-0.149546	TRUE	-0.602704	2 vs 1	-0.299092	2 vs 1	-0.150943	0.148148	Dach2:ENSMUST00000113382.7, Dach2:ENSMUST00000113380.7	Dach2	NA	NA	FALSE	FALSE	0.0692001	NA	FALSE
1028	1.62534e-12	1.2529e-10	0.66252	0.75	-0.0874797	TRUE	-0.927119	1 vs 2	-0.299825	1 vs 2	0.222823	0.522648	Miga1:ENSMUST00000073089.12, Miga1:ENSMUST00000199334.4, Miga1:ENSMUST00000199397.1	Miga1	NA	NA	FALSE	FALSE	1.2529e-10	NA	FALSE
1029	0.000285915	8.80254e-05	0.530547	0.681319	-0.150772	TRUE	-0.6375	1 vs 2	-0.301544	1 vs 2	0.0610932	0.362637	Wipi1:ENSMUST00000103060.9, Wipi1:ENSMUST00000047186.9	Wipi1	NA	NA	FALSE	FALSE	0.000285915	NA	FALSE
1030	7.08606e-09	NA	0.141593	0.293785	-0.152192	TRUE	-0.925052	2 vs 1	-0.304385	2 vs 1	-0.716814	-0.412429	Phykpl:ENSMUST00000020625.6, Phykpl:ENSMUST00000167797.7	Phykpl	NA	NA	FALSE	FALSE	7.08606e-09	NA	FALSE
1031	0.366352	NA	0.636364	0.789474	-0.15311	TRUE	-0.76214	1 vs 2	-0.30622	1 vs 2	0.272727	0.578947	Cage1:ENSMUST00000110233.7, Cage1:ENSMUST00000089840.4	Cage1	NA	NA	FALSE	FALSE	0.366352	NA	FALSE
1032	1.5905e-05	1.04127e-05	0.739326	0.893939	-0.154614	TRUE	-1.08916	2 vs 1	-0.309227	2 vs 1	0.478652	0.787879	Ice2:ENSMUST00000117246.7, Ice2:ENSMUST00000034761.14	Ice2	NA	NA	FALSE	FALSE	1.5905e-05	NA	FALSE
1033	3.00258e-90	6.54699e-101	0.81854	0.973356	-0.154817	FALSE	-2.09172	1 vs 2	-0.309633	1 vs 2	0.637079	0.946713	Rasgef1b:ENSMUST00000031276.14, Rasgef1b:ENSMUST00000161516.1	Rasgef1b	4.57894e-89	1.32031e-99	TRUE	TRUE	3.00258e-90	5.49473e-89	TRUE
1034	1.51841e-06	1.33714e-05	0.429074	0.584795	-0.155721	TRUE	-0.628121	2 vs 1	-0.311443	2 vs 1	-0.141852	0.169591	Etv3:ENSMUST00000117293.1, Etv3:ENSMUST00000119109.7	Etv3	NA	NA	FALSE	FALSE	1.33714e-05	NA	FALSE
1035	2.01241e-11	4.81854e-11	0.598103	0.753846	-0.155743	TRUE	-0.721664	2 vs 1	-0.311486	2 vs 1	0.196206	0.507692	Txnrd2:ENSMUST00000126778.7, Txnrd2:ENSMUST00000206151.1	Txnrd2	NA	NA	FALSE	FALSE	4.81854e-11	NA	FALSE
1036	0.245568	NA	0.461538	0.621212	-0.159674	TRUE	-0.648847	2 vs 1	-0.319347	2 vs 1	-0.0769231	0.242424	Dgkb:ENSMUST00000221176.1, Dgkb:ENSMUST00000040500.8	Dgkb	NA	NA	FALSE	FALSE	0.245568	NA	FALSE
1037	0.0697901	NA	0.0210526	0.181818	-0.160766	TRUE	-2.33537	2 vs 1	-0.321531	2 vs 1	-0.957895	-0.636364	Nmnat3:ENSMUST00000112935.7, Nmnat3:ENSMUST00000112938.7	Nmnat3	NA	NA	FALSE	FALSE	0.0697901	NA	FALSE
1038	0.0241878	0.0107217	0.433766	0.596774	-0.163008	TRUE	-0.658543	1 vs 2	-0.326016	1 vs 2	-0.132468	0.193548	Rad9b:ENSMUST00000117263.7, Rad9b:ENSMUST00000049009.6	Rad9b	NA	NA	FALSE	FALSE	0.0241878	NA	FALSE
1039	0.692319	NA	0.666667	0.833333	-0.166667	TRUE	-0.916291	1 vs 2	-0.333333	1 vs 2	0.333333	0.666667	Ryr2:ENSMUST00000021750.14, Ryr2:ENSMUST00000220597.1	Ryr2	NA	NA	FALSE	FALSE	0.692319	NA	FALSE
1040	1.41151e-17	3.05653e-13	0.0882927	0.262557	-0.174264	TRUE	-1.78952	1 vs 3	-0.348529	1 vs 3	-0.823415	-0.474886	Nectin3:ENSMUST00000023335.12, Nectin3:ENSMUST00000096052.8, Nectin3:ENSMUST00000023334.14	Nectin3	NA	NA	FALSE	FALSE	3.05653e-13	NA	FALSE
1041	6.02274e-33	5.76625e-28	0.540778	0.717	-0.176222	TRUE	-0.766154	1 vs 2	-0.352444	1 vs 2	0.0815558	0.434	Ginm1:ENSMUST00000039763.13, Ginm1:ENSMUST00000065124.1	Ginm1	NA	NA	FALSE	FALSE	5.76625e-28	NA	FALSE
1042	4.27662e-53	8.69156e-47	0.234043	0.413368	-0.179325	FALSE	-0.835563	2 vs 1	-0.35865	2 vs 1	-0.531915	-0.173265	Nsd2:ENSMUST00000114399.7, Nsd2:ENSMUST00000075812.10	Nsd2	4.23039e-52	7.88759e-46	TRUE	TRUE	8.69156e-47	8.37135e-46	TRUE
1043	3.3458e-11	2.36042e-09	0.557465	0.741935	-0.18447	TRUE	-0.825172	2 vs 1	-0.368941	2 vs 1	0.11493	0.483871	Fuz:ENSMUST00000209132.1, Fuz:ENSMUST00000071207.13	Fuz	NA	NA	FALSE	FALSE	2.36042e-09	NA	FALSE
1044	0.166723	0.174858	0.421053	0.607143	-0.18609	TRUE	-0.753772	1 vs 2	-0.37218	1 vs 2	-0.157895	0.214286	Spef1l:ENSMUST00000210254.1, Spef1l:ENSMUST00000121412.1	Spef1l	NA	NA	FALSE	FALSE	0.174858	NA	FALSE
1045	0.0611909	NA	0.205128	0.397436	-0.192308	TRUE	-0.938385	1 vs 2	-0.384615	1 vs 2	-0.589744	-0.205128	Sox8:ENSMUST00000025003.9, Sox8:ENSMUST00000173447.1	Sox8	NA	NA	FALSE	FALSE	0.0611909	NA	FALSE
1046	1.18805248494392e-317	6.78334e-225	0.0758246	0.271866	-0.196042	FALSE	-1.51531	2 vs 1	-0.392084	2 vs 1	-0.848351	-0.456267	Klc1:ENSMUST00000120544.8, Klc1:ENSMUST00000084941.11	Klc1	6.21181725724685e-316	2.73595e-223	TRUE	TRUE	6.78334e-225	2.75856e-223	TRUE
1047	4.18188e-12	8.17169e-12	0.768946	0.871191	-0.102246	TRUE	-1.03552	1 vs 2	-0.409858	1 vs 2	0.174629	0.584488	Med14:ENSMUST00000096495.10, Med14:ENSMUST00000115481.7, Med14:ENSMUST00000076016.5	Med14	NA	NA	FALSE	FALSE	8.17169e-12	NA	FALSE
1048	0.540291	NA	0.791667	1	-0.208333	TRUE	#NAME?	2 vs 1	-0.416667	2 vs 1	0.583333	1	Rgs5:ENSMUST00000152809.2, Rgs5:ENSMUST00000027997.8	Rgs5	NA	NA	FALSE	FALSE	0.540291	NA	FALSE
1049	8.25507e-41	2.80282e-45	0.713273	0.922092	-0.208819	FALSE	-1.55978	2 vs 1	-0.417638	2 vs 1	0.426546	0.844184	Epha7:ENSMUST00000080934.10, Epha7:ENSMUST00000029964.11	Epha7	6.56817e-40	2.48152e-44	TRUE	TRUE	8.25507e-41	6.71413e-40	TRUE
1050	0.144686	NA	0.142857	0.352941	-0.210084	TRUE	-1.18562	2 vs 1	-0.420168	2 vs 1	-0.714286	-0.294118	Rskr:ENSMUST00000046361.4, Rskr:ENSMUST00000238934.1	Rskr	NA	NA	FALSE	FALSE	0.144686	NA	FALSE
1051	2.11325e-18	2.50116e-18	0.559492	0.770093	-0.210601	TRUE	-0.969737	2 vs 1	-0.421202	2 vs 1	0.118985	0.540187	Ankrd27:ENSMUST00000186245.6, Ankrd27:ENSMUST00000040844.15	Ankrd27	NA	NA	FALSE	FALSE	2.50116e-18	NA	FALSE
1052	1	NA	0.785714	1	-0.214286	TRUE	#NAME?	2 vs 1	-0.428571	2 vs 1	0.571429	1	Cacnb2:ENSMUST00000195841.1, Cacnb2:ENSMUST00000114723.8	Cacnb2	NA	NA	FALSE	FALSE	1	NA	FALSE
1053	4.00983e-09	1.64536e-08	0.236726	0.451128	-0.214402	TRUE	-0.974601	1 vs 2	-0.428804	1 vs 2	-0.526549	-0.0977444	Gusb:ENSMUST00000026613.13, Gusb:ENSMUST00000111308.7	Gusb	NA	NA	FALSE	FALSE	1.64536e-08	NA	FALSE
1054	0.0431165	NA	0.741935	0.96	-0.218065	TRUE	-2.122	2 vs 1	-0.436129	2 vs 1	0.483871	0.92	Samd3:ENSMUST00000218301.1, Samd3:ENSMUST00000060716.5	Samd3	NA	NA	FALSE	FALSE	0.0431165	NA	FALSE
1055	0.000461372	0.00366597	0.101983	0.323529	-0.221546	TRUE	-1.43778	2 vs 1	-0.443093	2 vs 1	-0.796034	-0.352941	Mical2:ENSMUST00000050149.11, Mical2:ENSMUST00000051308.14	Mical2	NA	NA	FALSE	FALSE	0.00366597	NA	FALSE
1056	0.201122	NA	0.777778	1	-0.222222	TRUE	#NAME?	1 vs 2	-0.444444	1 vs 2	0.555556	1	Prok2:ENSMUST00000101120.10, Prok2:ENSMUST00000203738.1	Prok2	NA	NA	FALSE	FALSE	0.201122	NA	FALSE
1057	2.79787e-06	6.75673e-07	0.172662	0.395122	-0.22246	TRUE	-1.14105	2 vs 1	-0.44492	2 vs 1	-0.654676	-0.209756	Rad54b:ENSMUST00000095145.11, Rad54b:ENSMUST00000070755.12	Rad54b	NA	NA	FALSE	FALSE	2.79787e-06	NA	FALSE
1058	4.99282e-56	9.12601e-54	0.172171	0.397995	-0.225824	FALSE	-1.15649	1 vs 2	-0.451647	1 vs 2	-0.655658	-0.20401	Magi1:ENSMUST00000089317.11, Magi1:ENSMUST00000203688.2	Magi1	5.07603e-55	9.46498e-53	TRUE	TRUE	9.12601e-54	1.01216e-52	TRUE
1059	0.134303	0.211642	0.333333	0.56	-0.226667	TRUE	-0.934309	2 vs 1	-0.453333	2 vs 1	-0.333333	0.12	Tulp2:ENSMUST00000210868.1, Tulp2:ENSMUST00000210813.1	Tulp2	NA	NA	FALSE	FALSE	0.211642	NA	FALSE
1060	1.94354e-11	1.63956e-09	0.547368	0.778146	-0.230777	TRUE	-1.06485	1 vs 2	-0.461555	1 vs 2	0.0947368	0.556291	Nuf2:ENSMUST00000111368.7, Nuf2:ENSMUST00000192248.1	Nuf2	NA	NA	FALSE	FALSE	1.63956e-09	NA	FALSE
1061	0.794773	NA	0.768212	1	-0.231788	TRUE	#NAME?	1 vs 2	-0.463576	1 vs 2	0.536424	1	Iqsec3:ENSMUST00000046373.7, Iqsec3:ENSMUST00000151397.2	Iqsec3	NA	NA	FALSE	FALSE	0.794773	NA	FALSE
1062	0.00211558	NA	0.220833	0.454545	-0.233712	TRUE	-1.0785	2 vs 1	-0.467424	2 vs 1	-0.558333	-0.0909091	Pigz:ENSMUST00000134666.2, Pigz:ENSMUST00000052174.2	Pigz	NA	NA	FALSE	FALSE	0.00211558	NA	FALSE
1063	0.0136481	NA	0.53125	0.765101	-0.233851	TRUE	-1.05569	2 vs 1	-0.467701	2 vs 1	0.0625	0.530201	Dock1:ENSMUST00000211593.1, Dock1:ENSMUST00000084488.4	Dock1	NA	NA	FALSE	FALSE	0.0136481	NA	FALSE
1064	4.72069e-151	4.71915e-112	0.0972769	0.333551	-0.236274	FALSE	-1.53569	2 vs 1	-0.472549	2 vs 1	-0.805446	-0.332897	Phf20l1:ENSMUST00000230882.1, Phf20l1:ENSMUST00000229160.1	Phf20l1	1.5707e-149	1.22361e-110	TRUE	TRUE	4.71915e-112	1.32862e-110	TRUE
1065	0.32815	NA	0.56	0.8	-0.24	TRUE	#NAME?	2 vs 1	-0.48	2 vs 1	-0.08	0.4	Cfap61:ENSMUST00000118002.1, Cfap61:ENSMUST00000138774.7, Cfap61:ENSMUST00000133433.7	Cfap61	NA	NA	FALSE	FALSE	0.32815	NA	FALSE
1066	0.293905	NA	0.55814	0.8	-0.24186	TRUE	-1.15268	1 vs 2	-0.483721	1 vs 2	0.116279	0.6	Syt17:ENSMUST00000081574.7, Syt17:ENSMUST00000203485.2	Syt17	NA	NA	FALSE	FALSE	0.293905	NA	FALSE
1067	3.00262e-64	1.0274e-54	0.288982	0.534072	-0.24509	FALSE	-1.14573	1 vs 3	-0.490179	1 vs 3	-0.422036	0.0681431	Cyhr1:ENSMUST00000081291.12, Cyhr1:ENSMUST00000229524.1, Cyhr1:ENSMUST00000231152.1	Cyhr1	3.6632e-63	1.16546e-53	TRUE	TRUE	1.0274e-54	1.17509e-53	TRUE
1068	0.0323624	NA	0.212121	0.459016	-0.246895	TRUE	-1.14788	2 vs 1	-0.49379	2 vs 1	-0.575758	-0.0819672	Egfr:ENSMUST00000102884.9, Egfr:ENSMUST00000020329.12	Egfr	NA	NA	FALSE	FALSE	0.0323624	NA	FALSE
1069	1	NA	0.75	1	-0.25	TRUE	#NAME?	1 vs 2	-0.5	1 vs 2	0.5	1	Cfap91:ENSMUST00000023501.15, Cfap91:ENSMUST00000114740.2	Cfap91	NA	NA	FALSE	FALSE	1	NA	FALSE
1070	0.324652	NA	0.25	0.5	-0.25	TRUE	#NAME?	3 vs 1	-0.5	3 vs 1	-0.5	0	Ddo:ENSMUST00000213442.1, Ddo:ENSMUST00000019977.7, Ddo:ENSMUST00000216830.1	Ddo	NA	NA	FALSE	FALSE	0.324652	NA	FALSE
1071	0.828593	NA	0.5	0.75	-0.25	TRUE	-1.09861	2 vs 1	-0.5	2 vs 1	0	0.5	Sim1:ENSMUST00000219436.1, Sim1:ENSMUST00000020071.3	Sim1	NA	NA	FALSE	FALSE	0.828593	NA	FALSE
1072	0.687288	NA	0.5	0.75	-0.25	TRUE	-1.09861	2 vs 1	-0.5	2 vs 1	0	0.5	Syk:ENSMUST00000118756.7, Syk:ENSMUST00000120135.7	Syk	NA	NA	FALSE	FALSE	0.687288	NA	FALSE
1073	0.828593	NA	0.25	0.5	-0.25	TRUE	-1.09861	1 vs 2	-0.5	1 vs 2	-0.5	0	Zcwpw2:ENSMUST00000187803.2, Zcwpw2:ENSMUST00000238919.1	Zcwpw2	NA	NA	FALSE	FALSE	0.828593	NA	FALSE
1074	2.20218e-09	2.4295e-08	0.369565	0.624277	-0.254712	TRUE	-1.04183	2 vs 1	-0.509424	2 vs 1	-0.26087	0.248555	Tmem260:ENSMUST00000226400.1, Tmem260:ENSMUST00000111735.9	Tmem260	NA	NA	FALSE	FALSE	2.4295e-08	NA	FALSE
1075	0.001189	NA	0.45	0.707865	-0.257865	TRUE	-1.08571	2 vs 1	-0.51573	2 vs 1	-0.1	0.41573	Wdr76:ENSMUST00000099473.9, Wdr76:ENSMUST00000110602.8	Wdr76	NA	NA	FALSE	FALSE	0.001189	NA	FALSE
1076	2.67332e-46	1.24853e-54	0.677488	0.947447	-0.269959	FALSE	-2.14971	2 vs 1	-0.539919	2 vs 1	0.354976	0.894895	Map4:ENSMUST00000169851.7, Map4:ENSMUST00000035055.14	Map4	2.3296e-45	1.37339e-53	TRUE	TRUE	2.67332e-46	2.5088e-45	TRUE
1077	0.0992694	NA	0.390625	0.666667	-0.276042	TRUE	-1.13783	2 vs 1	-0.552083	2 vs 1	-0.21875	0.333333	Kif9:ENSMUST00000061155.11, Kif9:ENSMUST00000198043.4	Kif9	NA	NA	FALSE	FALSE	0.0992694	NA	FALSE
1078	0.0411149	0.141529	0.4	0.51	-0.11	TRUE	-2.2192	1 vs 2	-0.56	1 vs 2	-0.2	0.36	Crb1:ENSMUST00000059825.11, Crb1:ENSMUST00000198445.4, Crb1:ENSMUST00000196402.4	Crb1	NA	NA	FALSE	FALSE	0.141529	NA	FALSE
1079	0.493265	NA	0.719136	1	-0.280864	TRUE	#NAME?	2 vs 1	-0.561728	2 vs 1	0.438272	1	Atp2b3:ENSMUST00000033744.11, Atp2b3:ENSMUST00000088429.7	Atp2b3	NA	NA	FALSE	FALSE	0.493265	NA	FALSE
1080	0.00942295	NA	0.294872	0.576923	-0.282051	TRUE	-1.18199	2 vs 1	-0.564103	2 vs 1	-0.410256	0.153846	Iqck:ENSMUST00000208658.1, Iqck:ENSMUST00000106547.1	Iqck	NA	NA	FALSE	FALSE	0.00942295	NA	FALSE
1081	0.600471	NA	0.714286	1	-0.285714	TRUE	#NAME?	2 vs 1	-0.571429	2 vs 1	0.428571	1	Inpp4b:ENSMUST00000109851.2, Inpp4b:ENSMUST00000172031.8	Inpp4b	NA	NA	FALSE	FALSE	0.600471	NA	FALSE
1082	4.40887e-08	NA	0.706311	1	-0.293689	TRUE	#NAME?	2 vs 1	-0.587379	2 vs 1	0.412621	1	Pakap:ENSMUST00000102905.7, Pakap:ENSMUST00000102903.7	Pakap	NA	NA	FALSE	FALSE	4.40887e-08	NA	FALSE
1083	2.33506e-10	NA	0.319328	0.614035	-0.294707	TRUE	-1.22117	2 vs 1	-0.589415	2 vs 1	-0.361345	0.22807	Nemp1:ENSMUST00000118612.7, Nemp1:ENSMUST00000048099.4	Nemp1	NA	NA	FALSE	FALSE	2.33506e-10	NA	FALSE
1084	6.24917e-83	3.8597e-84	0.509166	0.825175	-0.316009	FALSE	-1.51514	2 vs 1	-0.632017	2 vs 1	0.0183326	0.65035	Arhgef7:ENSMUST00000110909.8, Arhgef7:ENSMUST00000074856.12	Arhgef7	9.14879e-82	5.8378e-83	TRUE	TRUE	6.24917e-83	9.52999e-82	TRUE
1085	0.109958	NA	0.0833333	0.409091	-0.325758	TRUE	-2.03017	2 vs 1	-0.651515	2 vs 1	-0.833333	-0.181818	Tmem253:ENSMUST00000228408.1, Tmem253:ENSMUST00000100638.3	Tmem253	NA	NA	FALSE	FALSE	0.109958	NA	FALSE
1086	4.42466e-08	NA	0.351916	0.680556	-0.328639	TRUE	-1.36695	1 vs 2	-0.657278	1 vs 2	-0.296167	0.361111	Cnksr2:ENSMUST00000026750.14, Cnksr2:ENSMUST00000112513.1	Cnksr2	NA	NA	FALSE	FALSE	4.42466e-08	NA	FALSE
1087	0.373678	NA	0	0.333333	-0.333333	TRUE	#NAME?	1 vs 2	-0.666667	1 vs 2	-1	-0.333333	Fhad1:ENSMUST00000105780.7, Fhad1:ENSMUST00000036701.7	Fhad1	NA	NA	FALSE	FALSE	0.373678	NA	FALSE
1088	0.559596	NA	0.666667	1	-0.333333	TRUE	#NAME?	1 vs 2	-0.666667	1 vs 2	0.333333	1	Gabrg3:ENSMUST00000068911.12, Gabrg3:ENSMUST00000068394.6	Gabrg3	NA	NA	FALSE	FALSE	0.559596	NA	FALSE
1089	1	NA	0	0.333333	-0.333333	TRUE	#NAME?	1 vs 2	-0.666667	1 vs 2	-1	-0.333333	Tead4:ENSMUST00000130454.7, Tead4:ENSMUST00000006311.12	Tead4	NA	NA	FALSE	FALSE	1	NA	FALSE
1090	1.44097e-07	NA	0.377483	0.729167	-0.351683	TRUE	-1.49064	1 vs 2	-0.703366	1 vs 2	-0.245033	0.458333	Pdlim5:ENSMUST00000029941.15, Pdlim5:ENSMUST00000170361.8	Pdlim5	NA	NA	FALSE	FALSE	1.44097e-07	NA	FALSE
1091	1.08228e-16	1.46883e-12	0.14881	0.505618	-0.356808	TRUE	-1.76644	2 vs 1	-0.713617	2 vs 1	-0.702381	0.011236	Rufy2:ENSMUST00000131718.7, Rufy2:ENSMUST00000119567.7	Rufy2	NA	NA	FALSE	FALSE	1.46883e-12	NA	FALSE
1092	0.257949	NA	0.430769	0.8	-0.369231	TRUE	-1.66501	1 vs 2	-0.738462	1 vs 2	-0.138462	0.6	Slc26a8:ENSMUST00000114764.7, Slc26a8:ENSMUST00000145224.1	Slc26a8	NA	NA	FALSE	FALSE	0.257949	NA	FALSE
1093	0.3135	NA	0.333333	0.714286	-0.380952	TRUE	-1.60944	1 vs 2	-0.761905	1 vs 2	-0.333333	0.428571	Flt1:ENSMUST00000031653.11, Flt1:ENSMUST00000110529.5	Flt1	NA	NA	FALSE	FALSE	0.3135	NA	FALSE
1094	4.21486e-63	6.04913e-63	0.239731	0.518759	-0.279028	TRUE	-1.94913	1 vs 4	-0.769958	2 vs 4	-0.326235	0.443723	Asph:ENSMUST00000078139.12, Asph:ENSMUST00000108333.7, Asph:ENSMUST00000103004.9, Asph:ENSMUST00000146441.7	Asph	NA	NA	FALSE	FALSE	6.04913e-63	NA	FALSE
1095	0	0	0.431983	0.820272	-0.388289	FALSE	-1.79196	1 vs 2	-0.776578	1 vs 2	-0.136034	0.640544	Cdc42:ENSMUST00000051477.12, Cdc42:ENSMUST00000030417.9	Cdc42	0	0	TRUE	TRUE	0	0	TRUE
1096	0.399859	NA	0	0.4	-0.4	TRUE	#NAME?	1 vs 2	-0.8	1 vs 2	-1	-0.2	Chrdl1:ENSMUST00000063029.12, Chrdl1:ENSMUST00000074660.11	Chrdl1	NA	NA	FALSE	FALSE	0.399859	NA	FALSE
1097	0.546949	NA	0	0.428571	-0.428571	TRUE	#NAME?	2 vs 1	-0.857143	2 vs 1	-1	-0.142857	Ahnak:ENSMUST00000092956.3, Ahnak:ENSMUST00000092955.10	Ahnak	NA	NA	FALSE	FALSE	0.546949	NA	FALSE
1098	0.102072	NA	0	0.428571	-0.428571	TRUE	#NAME?	2 vs 1	-0.857143	2 vs 1	-1	-0.142857	Cfap74:ENSMUST00000123952.8, Cfap74:ENSMUST00000238620.1	Cfap74	NA	NA	FALSE	FALSE	0.102072	NA	FALSE
1099	0.00607124	NA	0.363636	0.8	-0.436364	TRUE	-1.94591	1 vs 2	-0.872727	1 vs 2	-0.272727	0.6	Rbpms:ENSMUST00000191473.6, Rbpms:ENSMUST00000033995.13	Rbpms	NA	NA	FALSE	FALSE	0.00607124	NA	FALSE
1100	0	0	0.200514	0.669135	-0.468622	FALSE	-2.08736	1 vs 2	-0.937243	1 vs 2	-0.598973	0.338271	Atat1:ENSMUST00000149277.7, Atat1:ENSMUST00000141662.7	Atat1	0	0	TRUE	TRUE	0	0	TRUE
1101	0.111422	NA	0.272727	0.75	-0.477273	TRUE	-2.07944	1 vs 2	-0.954545	1 vs 2	-0.454545	0.5	Ttc16:ENSMUST00000091059.11, Ttc16:ENSMUST00000066478.8	Ttc16	NA	NA	FALSE	FALSE	0.111422	NA	FALSE
1102	0.0637465	NA	0.409091	0.583333	-0.174242	TRUE	#NAME?	2 vs 1	-1.01515	2 vs 1	-0.181818	0.833333	Trp63:ENSMUST00000115307.7, Trp63:ENSMUST00000115308.8, Trp63:ENSMUST00000065523.11	Trp63	NA	NA	FALSE	FALSE	0.0637465	NA	FALSE
1103	0	0	0.170618	0.683861	-0.513243	FALSE	-2.35283	1 vs 2	-1.02649	1 vs 2	-0.658763	0.367723	Masp1:ENSMUST00000229619.1, Masp1:ENSMUST00000230040.1	Masp1	0	0	TRUE	TRUE	0	0	TRUE
1104	0.0653732	NA	0.222222	0.75	-0.527778	TRUE	-2.35138	1 vs 2	-1.05556	1 vs 2	-0.555556	0.5	Hcrtr2:ENSMUST00000063140.14, Hcrtr2:ENSMUST00000184757.1	Hcrtr2	NA	NA	FALSE	FALSE	0.0653732	NA	FALSE
1105	5.5303e-41	8.18735e-39	0.297806	0.835526	-0.537721	TRUE	-2.48308	2 vs 1	-1.07544	2 vs 1	-0.404389	0.671053	Baiap2:ENSMUST00000106231.7, Baiap2:ENSMUST00000106233.1	Baiap2	NA	NA	FALSE	FALSE	8.18735e-39	NA	FALSE
1106	0.00145287	NA	0.252874	0.8	-0.547126	TRUE	-2.46964	1 vs 2	-1.09425	1 vs 2	-0.494253	0.6	Dnah9:ENSMUST00000080665.9, Dnah9:ENSMUST00000108691.1	Dnah9	NA	NA	FALSE	FALSE	0.00145287	NA	FALSE
1107	0	0	0.40368	0.957027	-0.553346	FALSE	-3.49341	1 vs 2	-1.10669	1 vs 2	-0.192639	0.914053	Tmod3:ENSMUST00000072232.8, Tmod3:ENSMUST00000215821.1	Tmod3	0	0	TRUE	TRUE	0	0	TRUE
1108	3.33706e-19	NA	0.270886	0.867925	-0.597038	TRUE	-2.87286	1 vs 2	-1.19408	1 vs 2	-0.458228	0.735849	Tmem151a:ENSMUST00000140389.7, Tmem151a:ENSMUST00000077066.7	Tmem151a	NA	NA	FALSE	FALSE	3.33706e-19	NA	FALSE
1109	0.0039407	NA	0.344828	1	-0.655172	TRUE	#NAME?	1 vs 2	-1.31034	1 vs 2	-0.310345	1	Glis3:ENSMUST00000162022.7, Glis3:ENSMUST00000112612.8	Glis3	NA	NA	FALSE	FALSE	0.0039407	NA	FALSE
1110	0.665006	NA	0	1	-1	TRUE	#NAME?	2 vs 1	-2	2 vs 1	-1	1	Fndc11:ENSMUST00000108835.1, Fndc11:ENSMUST00000050026.6	Fndc11	NA	NA	FALSE	FALSE	0.665006	NA	FALSE

## Sheet: cor_glu.vs.dorsal_rgc
	pval.chisq	pval.DM	warm.base	warm.alt	delta.warm	low.pct.flag	max.log.or	max.abs.log.or.id	max.prpchg	max.abs.prpchg.id	prp.dif.base	prp.dif.alt	trans	gene	pval.chisq.adj	pval.DM.adj	sig.chisq	sig.DM	pval.inter	pval.adj	sig
1	0.059551	NA	0.942564	0	0.942564	TRUE	Inf	1 vs 2	1.88513	1 vs 2	0.885128	-1	Kcnma1:ENSMUST00000145596.2, Kcnma1:ENSMUST00000190339.1	Kcnma1	NA	NA	FALSE	FALSE	0.059551	NA	FALSE
2	0	0	0.793156	0.473837	0.319319	FALSE	6.45934	3 vs 2	1.51283	3 vs 2	0.588415	-0.924419	Ntrk2:ENSMUST00000225583.1, Ntrk2:ENSMUST00000109838.9, Ntrk2:ENSMUST00000079828.6	Ntrk2	0	0	TRUE	TRUE	0	0	TRUE
3	0.676103	NA	0.733333	0	0.733333	TRUE	Inf	1 vs 2	1.46667	1 vs 2	0.466667	-1	Ankub1:ENSMUST00000238789.1, Ankub1:ENSMUST00000099091.3	Ankub1	NA	NA	FALSE	FALSE	0.676103	NA	FALSE
4	2.92541e-88	NA	0.68258	0.00384615	0.678733	TRUE	6.32248	1 vs 2	1.35747	1 vs 2	0.365159	-0.992308	Pcsk5:ENSMUST00000025618.15, Pcsk5:ENSMUST00000050715.9	Pcsk5	NA	NA	FALSE	FALSE	2.92541e-88	NA	FALSE
5	4.10943e-12	NA	0.835616	0.157895	0.677722	TRUE	3.29994	1 vs 2	1.35544	1 vs 2	0.671233	-0.684211	Pcdh1:ENSMUST00000160721.7, Pcdh1:ENSMUST00000057185.12	Pcdh1	NA	NA	FALSE	FALSE	4.10943e-12	NA	FALSE
6	0	5.0227e-227	0.958153	0.31094	0.647213	TRUE	3.92672	2 vs 1	1.29443	2 vs 1	0.916307	-0.378119	Lrrfip1:ENSMUST00000097649.9, Lrrfip1:ENSMUST00000068167.12	Lrrfip1	NA	NA	FALSE	FALSE	5.0227e-227	NA	FALSE
7	9.74682e-20	9.49372e-12	0.851251	0.206897	0.644354	TRUE	3.08818	1 vs 2	1.28871	1 vs 2	0.702502	-0.586207	Dnm3:ENSMUST00000086074.11, Dnm3:ENSMUST00000160665.7	Dnm3	NA	NA	FALSE	FALSE	9.49372e-12	NA	FALSE
8	0.00349509	NA	0.666667	0.0454545	0.621212	TRUE	3.73767	1 vs 2	1.24242	1 vs 2	0.333333	-0.909091	Cngb1:ENSMUST00000119870.8, Cngb1:ENSMUST00000093268.4	Cngb1	NA	NA	FALSE	FALSE	0.00349509	NA	FALSE
9	0	0	0.664007	0.0554072	0.608599	FALSE	3.51724	2 vs 1	1.2172	2 vs 1	0.328013	-0.889186	Syngr1:ENSMUST00000009728.12, Syngr1:ENSMUST00000009727.11	Syngr1	0	0	TRUE	TRUE	0	0	TRUE
10	2.30181e-30	NA	0.868984	0.31875	0.550234	TRUE	4.4609	3 vs 2	1.20408	3 vs 2	0.716578	-0.4875	Il1rap:ENSMUST00000174202.7, Il1rap:ENSMUST00000023156.12, Il1rap:ENSMUST00000096129.8	Il1rap	NA	NA	FALSE	FALSE	2.30181e-30	NA	FALSE
11	0	0	0.868056	0.266781	0.601274	FALSE	2.89489	2 vs 1	1.20255	2 vs 1	0.736111	-0.466437	Luc7l:ENSMUST00000025023.14, Luc7l:ENSMUST00000119928.7	Luc7l	0	0	TRUE	TRUE	0	0	TRUE
12	8.65412e-198	1.54976e-201	0.666952	0.112676	0.554276	TRUE	2.75812	2 vs 1	1.10855	2 vs 1	0.333904	-0.774648	Mta3:ENSMUST00000112349.8, Mta3:ENSMUST00000067826.14	Mta3	NA	NA	FALSE	FALSE	8.65412e-198	NA	FALSE
13	0.234958	NA	0.75	0.222222	0.527778	TRUE	2.35138	1 vs 2	1.05556	1 vs 2	0.5	-0.555556	Cfap91:ENSMUST00000023501.15, Cfap91:ENSMUST00000114740.2	Cfap91	NA	NA	FALSE	FALSE	0.234958	NA	FALSE
14	3.21388e-15	NA	0.564935	0.0416667	0.523268	TRUE	3.39671	1 vs 2	1.04654	1 vs 2	0.12987	-0.916667	Stx3:ENSMUST00000075304.13, Stx3:ENSMUST00000069285.5	Stx3	NA	NA	FALSE	FALSE	3.21388e-15	NA	FALSE
15	0	0	0.991413	0.468468	0.522945	FALSE	4.87522	2 vs 1	1.04589	2 vs 1	0.982827	-0.0630631	Ap1s2:ENSMUST00000112294.8, Ap1s2:ENSMUST00000069041.14	Ap1s2	0	0	TRUE	TRUE	0	0	TRUE
16	2.19012e-231	1.35961e-266	0.546576	0.0357143	0.510862	FALSE	3.48268	2 vs 1	1.02172	2 vs 1	0.0931517	-0.928571	Dclk1:ENSMUST00000199585.4, Dclk1:ENSMUST00000070418.8	Dclk1	3.9024e-230	3.52591e-265	TRUE	TRUE	2.19012e-231	4.51857e-230	TRUE
17	1.00988e-23	NA	0.853333	0.351198	0.502135	TRUE	3.04213	1 vs 2	1.00427	1 vs 3	0.706667	-0.297604	Adgrv1:ENSMUST00000128120.1, Adgrv1:ENSMUST00000128585.8, Adgrv1:ENSMUST00000146749.1	Adgrv1	NA	NA	FALSE	FALSE	1.00988e-23	NA	FALSE
18	0.478521	NA	1	0.5	0.5	TRUE	Inf	2 vs 1	1	2 vs 1	1	0	Grhl2:ENSMUST00000161405.7, Grhl2:ENSMUST00000022895.14	Grhl2	NA	NA	FALSE	FALSE	0.478521	NA	FALSE
19	1	NA	1	0.5	0.5	TRUE	Inf	1 vs 2	1	1 vs 2	1	0	Nkx2-2:ENSMUST00000109970.4, Nkx2-2:ENSMUST00000067075.6	Nkx2-2	NA	NA	FALSE	FALSE	1	NA	FALSE
20	1	NA	0.5	0	0.5	TRUE	Inf	2 vs 1	1	2 vs 1	0	-1	Sim1:ENSMUST00000219436.1, Sim1:ENSMUST00000020071.3	Sim1	NA	NA	FALSE	FALSE	1	NA	FALSE
21	1	NA	0.5	0	0.5	TRUE	Inf	2 vs 1	1	2 vs 1	0	-1	Ttc6:ENSMUST00000101398.9, Ttc6:ENSMUST00000172939.7	Ttc6	NA	NA	FALSE	FALSE	1	NA	FALSE
22	0	0	0.761305	0.27452	0.486785	FALSE	2.13166	2 vs 1	0.973569	2 vs 1	0.52261	-0.45096	Rnf130:ENSMUST00000054684.13, Rnf130:ENSMUST00000238748.1	Rnf130	0	0	TRUE	TRUE	0	0	TRUE
23	0.000830899	NA	0.7	0.227273	0.472727	TRUE	2.07107	2 vs 1	0.945455	2 vs 1	0.4	-0.545455	Irak4:ENSMUST00000074936.9, Irak4:ENSMUST00000109248.1	Irak4	NA	NA	FALSE	FALSE	0.000830899	NA	FALSE
24	3.27615e-114	NA	0.471616	0.00838323	0.463232	TRUE	4.65944	2 vs 1	0.926465	2 vs 1	-0.0567686	-0.983234	Septin8:ENSMUST00000117061.7, Septin8:ENSMUST00000121334.7	Septin8	NA	NA	FALSE	FALSE	3.27615e-114	NA	FALSE
25	1.36604e-60	8.49701e-46	0.822187	0.36	0.462187	TRUE	2.1066	1 vs 2	0.924375	1 vs 2	0.644375	-0.28	Kalrn:ENSMUST00000114973.8, Kalrn:ENSMUST00000114963.7	Kalrn	NA	NA	FALSE	FALSE	8.49701e-46	NA	FALSE
26	0.0170312	NA	0.542484	0.1	0.442484	TRUE	2.36757	2 vs 1	0.884967	2 vs 1	0.0849673	-0.8	Fbxl21:ENSMUST00000121095.7, Fbxl21:ENSMUST00000121871.7	Fbxl21	NA	NA	FALSE	FALSE	0.0170312	NA	FALSE
27	6.0983e-84	2.07671e-69	0.841346	0.401119	0.440227	TRUE	2.06908	1 vs 2	0.880454	1 vs 2	0.682692	-0.197761	Mbtps2:ENSMUST00000058098.14, Mbtps2:ENSMUST00000112522.8	Mbtps2	NA	NA	FALSE	FALSE	2.07671e-69	NA	FALSE
28	0.013938	NA	0.56	0.125	0.435	TRUE	Inf	3 vs 1	0.87	3 vs 1	0.12	-0.75	Cfap61:ENSMUST00000118002.1, Cfap61:ENSMUST00000138774.7, Cfap61:ENSMUST00000133433.7	Cfap61	NA	NA	FALSE	FALSE	0.013938	NA	FALSE
29	1	NA	0.430769	0	0.430769	TRUE	Inf	1 vs 2	0.861538	1 vs 2	-0.138462	-1	Slc26a8:ENSMUST00000114764.7, Slc26a8:ENSMUST00000145224.1	Slc26a8	NA	NA	FALSE	FALSE	1	NA	FALSE
30	0.176565	NA	0.625	0.2	0.425	TRUE	1.89712	2 vs 1	0.85	2 vs 1	0.25	-0.6	Spag16:ENSMUST00000113940.3, Spag16:ENSMUST00000065425.11	Spag16	NA	NA	FALSE	FALSE	0.176565	NA	FALSE
31	8.68048e-51	2.74363e-61	0.452137	0.0302198	0.421917	TRUE	3.27653	2 vs 1	0.843835	2 vs 1	-0.0957255	-0.93956	Rasgrp2:ENSMUST00000113469.2, Rasgrp2:ENSMUST00000035716.14	Rasgrp2	NA	NA	FALSE	FALSE	8.68048e-51	NA	FALSE
32	4.56354e-09	NA	0.686275	0.30625	0.380025	TRUE	3.30532	2 vs 3	0.815686	2 vs 3	0.215686	-0.6	Grik1:ENSMUST00000228188.1, Grik1:ENSMUST00000228034.1, Grik1:ENSMUST00000211444.1	Grik1	NA	NA	FALSE	FALSE	4.56354e-09	NA	FALSE
33	3.6045e-36	1.13002e-35	0.860526	0.493902	0.366624	TRUE	2.34233	1 vs 2	0.795892	1 vs 2	0.710526	-0.0853659	Sgsm1:ENSMUST00000048112.12, Sgsm1:ENSMUST00000112325.7, Sgsm1:ENSMUST00000112324.1	Sgsm1	NA	NA	FALSE	FALSE	1.13002e-35	NA	FALSE
34	0.00969711	NA	0.722222	0.333333	0.388889	TRUE	2.3289	3 vs 1	0.777778	3 vs 1	0.444444	-0.333333	Cp:ENSMUST00000091309.11, Cp:ENSMUST00000108329.7, Cp:ENSMUST00000003714.12	Cp	NA	NA	FALSE	FALSE	0.00969711	NA	FALSE
35	0.556976	NA	0.714286	0.333333	0.380952	TRUE	1.60944	1 vs 2	0.761905	1 vs 2	0.428571	-0.333333	Ankrd33b:ENSMUST00000123325.8, Ankrd33b:ENSMUST00000076942.4	Ankrd33b	NA	NA	FALSE	FALSE	0.556976	NA	FALSE
36	4.44115e-109	9.29951e-123	0.498026	0.128703	0.369323	FALSE	1.90458	2 vs 1	0.738646	2 vs 1	-0.00394841	-0.742594	Itsn1:ENSMUST00000056482.13, Itsn1:ENSMUST00000114002.8	Itsn1	4.24618e-108	9.04377e-122	TRUE	TRUE	4.44115e-109	4.24618e-108	TRUE
37	0.0970559	NA	0.571429	0.203704	0.367725	TRUE	1.65099	1 vs 2	0.73545	1 vs 2	0.142857	-0.592593	Calca:ENSMUST00000032906.10, Calca:ENSMUST00000032907.8	Calca	NA	NA	FALSE	FALSE	0.0970559	NA	FALSE
38	3.09441e-258	4.22279e-251	0.645627	0.513926	0.131701	FALSE	2.05868	3 vs 2	0.726175	3 vs 2	0.0295311	-0.696644	Septin11:ENSMUST00000201700.3, Septin11:ENSMUST00000074733.10, Septin11:ENSMUST00000201421.3	Septin11	6.06503e-257	1.02667e-249	TRUE	TRUE	4.22279e-251	1.10356e-249	TRUE
39	2.65262e-14	NA	0.977635	0.615385	0.36225	TRUE	3.30762	1 vs 2	0.7245	1 vs 2	0.955269	0.230769	Spata6l:ENSMUST00000179171.1, Spata6l:ENSMUST00000025872.12	Spata6l	NA	NA	FALSE	FALSE	2.65262e-14	NA	FALSE
40	5.51658e-189	8.15039e-142	0.867556	0.509718	0.357838	FALSE	1.84064	1 vs 2	0.715675	1 vs 2	0.735111	0.0194357	Septin6:ENSMUST00000060474.13, Septin6:ENSMUST00000053456.10	Septin6	7.4569e-188	9.60758e-141	TRUE	TRUE	8.15039e-142	1.03063e-140	TRUE
41	3.10131e-42	5.03687e-42	0.583221	0.228283	0.354938	TRUE	1.55404	1 vs 2	0.709875	1 vs 2	0.166441	-0.543434	Map3k10:ENSMUST00000036453.13, Map3k10:ENSMUST00000138243.1	Map3k10	NA	NA	FALSE	FALSE	5.03687e-42	NA	FALSE
42	0.243303	NA	0.85	0.5	0.35	TRUE	1.7346	2 vs 1	0.7	2 vs 1	0.7	0	Vwa5b2:ENSMUST00000100074.9, Vwa5b2:ENSMUST00000096197.10	Vwa5b2	NA	NA	FALSE	FALSE	0.243303	NA	FALSE
43	2.53133e-22	4.08768e-22	0.581062	0.232727	0.348334	TRUE	1.52011	2 vs 1	0.696669	2 vs 1	0.162123	-0.534545	Mbd2:ENSMUST00000114946.3, Mbd2:ENSMUST00000074058.10	Mbd2	NA	NA	FALSE	FALSE	4.08768e-22	NA	FALSE
44	2.44031e-06	0.000491719	0.953875	0.615385	0.33849	TRUE	2.55916	2 vs 1	0.67698	2 vs 1	0.907749	0.230769	Trpm3:ENSMUST00000099566.4, Trpm3:ENSMUST00000237357.1	Trpm3	NA	NA	FALSE	FALSE	0.000491719	NA	FALSE
45	7.3894e-20	5.61492e-18	0.683453	0.345361	0.338092	TRUE	1.40918	2 vs 1	0.676185	2 vs 1	0.366906	-0.309278	Lemd1:ENSMUST00000189062.1, Lemd1:ENSMUST00000188169.6	Lemd1	NA	NA	FALSE	FALSE	5.61492e-18	NA	FALSE
46	1	NA	1	0.666667	0.333333	TRUE	Inf	2 vs 1	0.666667	2 vs 1	1	0.333333	Lrrc18:ENSMUST00000120866.7, Lrrc18:ENSMUST00000038956.11	Lrrc18	NA	NA	FALSE	FALSE	1	NA	FALSE
47	0.00304225	NA	0.965517	0.634146	0.331371	TRUE	2.78216	1 vs 2	0.662742	1 vs 2	0.931034	0.268293	Epb41l4b:ENSMUST00000095076.9, Epb41l4b:ENSMUST00000030142.3	Epb41l4b	NA	NA	FALSE	FALSE	0.00304225	NA	FALSE
48	1.31512e-209	2.64331e-214	0.335505	0.00663285	0.328872	FALSE	4.32567	2 vs 1	0.657744	2 vs 1	-0.32899	-0.986734	Rdx:ENSMUST00000163153.8, Rdx:ENSMUST00000238858.1	Rdx	1.90936e-208	4.89643e-213	TRUE	TRUE	1.31512e-209	2.4549e-208	TRUE
49	1.35208e-05	NA	0.373279	0.0444444	0.328835	TRUE	2.54988	2 vs 1	0.65767	2 vs 1	-0.253441	-0.911111	Pclo:ENSMUST00000182407.7, Pclo:ENSMUST00000030691.16	Pclo	NA	NA	FALSE	FALSE	1.35208e-05	NA	FALSE
50	0	4.08192e-289	0.974381	0.652584	0.321797	FALSE	3.00805	1 vs 2	0.643593	1 vs 2	0.948762	0.305169	Ppp3cb:ENSMUST00000159027.7, Ppp3cb:ENSMUST00000161989.1	Ppp3cb	0	1.13419e-287	TRUE	TRUE	4.08192e-289	1.14294e-287	TRUE
51	0.279541	NA	0.818182	0.5	0.318182	TRUE	1.50408	2 vs 1	0.636364	2 vs 1	0.636364	0	Irf5:ENSMUST00000004392.11, Irf5:ENSMUST00000167252.4	Irf5	NA	NA	FALSE	FALSE	0.279541	NA	FALSE
52	8.52636e-289	1.26987e-185	0.925283	0.611234	0.314049	FALSE	2.06389	1 vs 2	0.628098	1 vs 2	0.850566	0.222469	Ntrk3:ENSMUST00000039431.13, Ntrk3:ENSMUST00000039438.8	Ntrk3	1.85685e-287	1.82955e-184	TRUE	TRUE	1.26987e-185	1.84366e-184	TRUE
53	0.241091	NA	0.979167	0.666667	0.3125	TRUE	3.157	1 vs 2	0.625	1 vs 2	0.958333	0.333333	Cd37:ENSMUST00000209779.1, Cd37:ENSMUST00000210372.1	Cd37	NA	NA	FALSE	FALSE	0.241091	NA	FALSE
54	0.00195213	NA	0.788538	0.47619	0.312347	TRUE	1.41144	1 vs 2	0.624694	1 vs 2	0.577075	-0.047619	Dpf3:ENSMUST00000178756.7, Dpf3:ENSMUST00000177959.7	Dpf3	NA	NA	FALSE	FALSE	0.00195213	NA	FALSE
55	0.000892884	NA	0.873874	0.5625	0.311374	TRUE	1.68434	2 vs 1	0.622748	2 vs 1	0.747748	0.125	Hivep3:ENSMUST00000084306.4, Hivep3:ENSMUST00000106307.8	Hivep3	NA	NA	FALSE	FALSE	0.000892884	NA	FALSE
56	0.0509248	0.127807	0.906977	0.6	0.306977	TRUE	1.8718	2 vs 1	0.613953	2 vs 1	0.813953	0.2	Igf1:ENSMUST00000062862.12, Igf1:ENSMUST00000105300.8	Igf1	NA	NA	FALSE	FALSE	0.127807	NA	FALSE
57	0.339597	NA	0.466667	0.166667	0.3	TRUE	1.47591	2 vs 1	0.6	2 vs 1	-0.0666667	-0.666667	Cabyr:ENSMUST00000186263.1, Cabyr:ENSMUST00000234735.1	Cabyr	NA	NA	FALSE	FALSE	0.339597	NA	FALSE
58	2.12664e-154	2.06923e-139	0.445006	0.145392	0.299614	FALSE	1.55034	1 vs 2	0.599228	1 vs 2	-0.109988	-0.709216	Bcl7c:ENSMUST00000205977.1, Bcl7c:ENSMUST00000207019.1	Bcl7c	2.52619e-153	2.36745e-138	TRUE	TRUE	2.06923e-139	2.3857e-138	TRUE
59	2.17418e-51	6.63295e-47	0.76868	0.478002	0.290677	TRUE	1.28892	1 vs 2	0.581355	1 vs 2	0.537359	-0.0439952	Wdr37:ENSMUST00000054251.12, Wdr37:ENSMUST00000176922.7	Wdr37	NA	NA	FALSE	FALSE	6.63295e-47	NA	FALSE
60	3.88533e-08	3.84817e-07	0.869767	0.580645	0.289122	TRUE	1.57348	2 vs 1	0.578245	2 vs 1	0.739535	0.16129	Ncam2:ENSMUST00000037785.13, Ncam2:ENSMUST00000067602.4	Ncam2	NA	NA	FALSE	FALSE	3.84817e-07	NA	FALSE
61	0.479725	NA	0.786885	0.5	0.286885	TRUE	1.30625	2 vs 1	0.57377	2 vs 1	0.57377	0	Kndc1:ENSMUST00000121839.1, Kndc1:ENSMUST00000053445.15	Kndc1	NA	NA	FALSE	FALSE	0.479725	NA	FALSE
62	1.93318e-141	7.40252e-152	0.85338	0.566927	0.286453	FALSE	1.49204	1 vs 2	0.572905	1 vs 2	0.70676	0.133855	Qk:ENSMUST00000233645.1, Qk:ENSMUST00000042296.8	Qk	2.04813e-140	9.92959e-151	TRUE	TRUE	1.93318e-141	2.29639e-140	TRUE
63	0.129232	NA	0.85	0.666667	0.183333	TRUE	1.37432	3 vs 2	0.563636	3 vs 2	0.563636	0	Ripor2:ENSMUST00000058009.15, Ripor2:ENSMUST00000091694.9, Ripor2:ENSMUST00000110383.7	Ripor2	NA	NA	FALSE	FALSE	0.129232	NA	FALSE
64	2.1634e-28	8.21119e-29	0.841886	0.561062	0.280824	TRUE	1.42686	2 vs 1	0.561649	2 vs 1	0.683773	0.122124	Cflar:ENSMUST00000114309.7, Cflar:ENSMUST00000114313.7	Cflar	NA	NA	FALSE	FALSE	2.1634e-28	NA	FALSE
65	0.0357981	NA	0.472362	0.2	0.272362	TRUE	1.27563	2 vs 1	0.544724	2 vs 1	-0.0552764	-0.6	Disc1:ENSMUST00000122389.7, Disc1:ENSMUST00000118942.7	Disc1	NA	NA	FALSE	FALSE	0.0357981	NA	FALSE
66	0.0387124	NA	0.446154	0.173913	0.272241	TRUE	1.34192	1 vs 2	0.544482	1 vs 2	-0.107692	-0.652174	Nfatc2:ENSMUST00000109184.7, Nfatc2:ENSMUST00000171689.7	Nfatc2	NA	NA	FALSE	FALSE	0.0387124	NA	FALSE
67	0.466245	NA	0.666667	0.4	0.266667	TRUE	1.09861	1 vs 2	0.533333	1 vs 2	0.333333	-0.2	Gabrg3:ENSMUST00000068911.12, Gabrg3:ENSMUST00000068394.6	Gabrg3	NA	NA	FALSE	FALSE	0.466245	NA	FALSE
68	3.76225e-53	NA	0.988938	0.728	0.260938	TRUE	3.50862	2 vs 1	0.521876	2 vs 1	0.977876	0.456	Scn8a:ENSMUST00000096198.9, Scn8a:ENSMUST00000108909.8	Scn8a	NA	NA	FALSE	FALSE	3.76225e-53	NA	FALSE
69	1.58815e-30	1.72747e-29	0.410109	0.151104	0.259006	TRUE	1.36246	1 vs 2	0.518012	1 vs 2	-0.179781	-0.697793	Gls:ENSMUST00000114513.8, Gls:ENSMUST00000114510.7	Gls	NA	NA	FALSE	FALSE	1.72747e-29	NA	FALSE
70	1	NA	0.252874	0	0.252874	TRUE	Inf	1 vs 2	0.505747	1 vs 2	-0.494253	-1	Dnah9:ENSMUST00000080665.9, Dnah9:ENSMUST00000108691.1	Dnah9	NA	NA	FALSE	FALSE	1	NA	FALSE
71	5.17905e-21	NA	0.85565	0.603604	0.252046	TRUE	1.35911	1 vs 2	0.504092	1 vs 2	0.711299	0.207207	Cacnb1:ENSMUST00000017552.12, Cacnb1:ENSMUST00000107561.8	Cacnb1	NA	NA	FALSE	FALSE	5.17905e-21	NA	FALSE
72	0.0571281	NA	0.417272	0.166667	0.250605	TRUE	1.27546	2 vs 1	0.501211	2 vs 1	-0.165456	-0.666667	Kcnc1:ENSMUST00000025202.7, Kcnc1:ENSMUST00000160433.2	Kcnc1	NA	NA	FALSE	FALSE	0.0571281	NA	FALSE
73	0.398462	NA	1	0.75	0.25	TRUE	Inf	1 vs 2	0.5	1 vs 2	1	0.5	Ccdc141:ENSMUST00000049544.13, Ccdc141:ENSMUST00000111833.2	Ccdc141	NA	NA	FALSE	FALSE	0.398462	NA	FALSE
74	2.70451e-08	6.64723e-06	0.827059	0.578313	0.248746	TRUE	1.24907	1 vs 2	0.497491	1 vs 2	0.654118	0.156627	Pde1a:ENSMUST00000102655.9, Pde1a:ENSMUST00000090756.10	Pde1a	NA	NA	FALSE	FALSE	6.64723e-06	NA	FALSE
75	0.293332	NA	0.875	0.627119	0.247881	TRUE	1.42603	2 vs 1	0.495763	2 vs 1	0.75	0.254237	Rreb1:ENSMUST00000110238.9, Rreb1:ENSMUST00000128570.8	Rreb1	NA	NA	FALSE	FALSE	0.293332	NA	FALSE
76	4.01037e-12	NA	0.698276	0.457792	0.240484	TRUE	1.00834	2 vs 1	0.480967	2 vs 1	0.396552	-0.0844156	Farp2:ENSMUST00000122402.2, Farp2:ENSMUST00000120301.7	Farp2	NA	NA	FALSE	FALSE	4.01037e-12	NA	FALSE
77	1.1868e-11	NA	0.690733	0.455645	0.235088	TRUE	0.981434	2 vs 1	0.470175	2 vs 1	0.381466	-0.0887097	Mbd5:ENSMUST00000112745.7, Mbd5:ENSMUST00000047413.9	Mbd5	NA	NA	FALSE	FALSE	1.1868e-11	NA	FALSE
78	5.94722e-11	1.71109e-08	0.701531	0.469767	0.231763	TRUE	0.975675	1 vs 2	0.463526	1 vs 2	0.403061	-0.0604651	Ttbk1:ENSMUST00000047034.8, Ttbk1:ENSMUST00000225808.1	Ttbk1	NA	NA	FALSE	FALSE	1.71109e-08	NA	FALSE
79	4.85187e-59	7.29293e-59	0.535978	0.304582	0.231396	FALSE	0.969732	2 vs 1	0.462791	2 vs 1	0.0719555	-0.390836	Dab1:ENSMUST00000106826.7, Dab1:ENSMUST00000106830.8	Dab1	3.01894e-58	4.65074e-58	TRUE	TRUE	7.29293e-59	4.84547e-58	TRUE
80	2.10461e-28	9.24946e-28	0.445209	0.215938	0.229271	TRUE	1.06945	1 vs 2	0.458542	1 vs 2	-0.109582	-0.568123	Kcnh7:ENSMUST00000075052.9, Kcnh7:ENSMUST00000112454.7	Kcnh7	NA	NA	FALSE	FALSE	9.24946e-28	NA	FALSE
81	0.835994	NA	0.8	0.571429	0.228571	TRUE	1.09861	1 vs 2	0.457143	1 vs 2	0.6	0.142857	Htra3:ENSMUST00000087629.9, Htra3:ENSMUST00000114233.2	Htra3	NA	NA	FALSE	FALSE	0.835994	NA	FALSE
82	5.81558e-78	2.36368e-75	0.422898	0.195251	0.227648	FALSE	1.10536	1 vs 2	0.455295	1 vs 2	-0.154204	-0.609499	Atp2a2:ENSMUST00000177974.7, Atp2a2:ENSMUST00000031423.9	Atp2a2	4.47001e-77	1.87647e-74	TRUE	TRUE	2.36368e-75	1.89094e-74	TRUE
83	9.0288e-05	NA	0.938462	0.711538	0.226923	TRUE	1.82171	1 vs 2	0.453846	1 vs 2	0.876923	0.423077	Gm12216:ENSMUST00000220191.1, Gm12216:ENSMUST00000121435.1	Gm12216	NA	NA	FALSE	FALSE	9.0288e-05	NA	FALSE
84	2.04286e-33	1.15007e-22	0.921693	0.696429	0.225264	TRUE	1.63522	2 vs 1	0.450528	2 vs 1	0.843386	0.392857	Anks1b:ENSMUST00000182083.1, Anks1b:ENSMUST00000182356.7	Anks1b	NA	NA	FALSE	FALSE	1.15007e-22	NA	FALSE
85	0.846866	NA	0.558511	0.333333	0.225177	TRUE	0.928267	1 vs 2	0.450355	1 vs 2	0.117021	-0.333333	Ano4:ENSMUST00000182341.7, Ano4:ENSMUST00000181976.7	Ano4	NA	NA	FALSE	FALSE	0.846866	NA	FALSE
86	0	0	0.900234	0.675531	0.224703	FALSE	1.46652	2 vs 1	0.449406	2 vs 1	0.800468	0.351062	Zwint:ENSMUST00000105431.7, Zwint:ENSMUST00000020081.10	Zwint	0	0	TRUE	TRUE	0	0	TRUE
87	1.31459e-15	3.34309e-14	0.62527	0.402204	0.223066	TRUE	0.908266	2 vs 1	0.446131	2 vs 1	0.250539	-0.195592	Ccpg1:ENSMUST00000150826.8, Ccpg1:ENSMUST00000037977.14	Ccpg1	NA	NA	FALSE	FALSE	3.34309e-14	NA	FALSE
88	4.70608e-86	7.00217e-68	0.909698	0.695169	0.214529	FALSE	1.86221	3 vs 1	0.440735	3 vs 2	0.766339	0.325604	Kmt5b:ENSMUST00000113968.8, Kmt5b:ENSMUST00000113970.7, Kmt5b:ENSMUST00000113977.8	Kmt5b	4.01039e-85	5.23816e-67	TRUE	TRUE	7.00217e-68	5.27856e-67	TRUE
89	0.177365	NA	0.469388	0.25	0.219388	TRUE	1.32176	1 vs 3	0.438776	1 vs 3	-0.0612245	-0.5	Igsf1:ENSMUST00000114893.7, Igsf1:ENSMUST00000072037.12, Igsf1:ENSMUST00000114891.1	Igsf1	NA	NA	FALSE	FALSE	0.177365	NA	FALSE
90	5.96487e-16	NA	0.22589	0.0077821	0.218108	TRUE	3.61645	1 vs 2	0.436216	1 vs 2	-0.54822	-0.984436	Pde4dip:ENSMUST00000168438.8, Pde4dip:ENSMUST00000045243.14	Pde4dip	NA	NA	FALSE	FALSE	5.96487e-16	NA	FALSE
91	0.0205743	NA	0.509091	0.293333	0.215758	TRUE	0.915617	1 vs 2	0.431515	1 vs 2	0.0181818	-0.413333	Cfap100:ENSMUST00000062750.11, Cfap100:ENSMUST00000134224.7	Cfap100	NA	NA	FALSE	FALSE	0.0205743	NA	FALSE
92	0.425095	NA	0.777778	0.571429	0.206349	TRUE	0.965081	1 vs 2	0.412698	1 vs 2	0.555556	0.142857	Fgd3:ENSMUST00000110087.8, Fgd3:ENSMUST00000110086.1	Fgd3	NA	NA	FALSE	FALSE	0.425095	NA	FALSE
93	1.60619e-87	4.62278e-92	0.444305	0.240891	0.203414	TRUE	2.3164	1 vs 3	0.406828	1 vs 3	-0.11139	-0.518219	Lamp2:ENSMUST00000074913.11, Lamp2:ENSMUST00000016678.13, Lamp2:ENSMUST00000061755.8	Lamp2	NA	NA	FALSE	FALSE	1.60619e-87	NA	FALSE
94	3.79462e-10	3.69803e-08	0.47819	0.390374	0.0878158	TRUE	1.43977	1 vs 2	0.406139	1 vs 2	0.0104167	-0.395722	Paqr3:ENSMUST00000069453.8, Paqr3:ENSMUST00000112969.9, Paqr3:ENSMUST00000112968.1	Paqr3	NA	NA	FALSE	FALSE	3.69803e-08	NA	FALSE
95	0.07974	NA	0.785714	0.583333	0.202381	TRUE	0.962811	1 vs 2	0.404762	1 vs 2	0.571429	0.166667	Ghr:ENSMUST00000069451.10, Ghr:ENSMUST00000110698.8	Ghr	NA	NA	FALSE	FALSE	0.07974	NA	FALSE
96	7.65874e-93	4.73306e-93	0.909061	0.707451	0.20161	FALSE	1.41919	2 vs 1	0.40322	2 vs 1	0.818122	0.414902	Fgfr1op2:ENSMUST00000037836.11, Fgfr1op2:ENSMUST00000067404.12	Fgfr1op2	6.98192e-92	4.28177e-92	TRUE	TRUE	7.65874e-93	7.14815e-92	TRUE
97	0.00712348	NA	0.675926	0.474576	0.20135	TRUE	0.836894	1 vs 2	0.402699	1 vs 2	0.351852	-0.0508475	Zbtb46:ENSMUST00000029106.12, Zbtb46:ENSMUST00000087409.9	Zbtb46	NA	NA	FALSE	FALSE	0.00712348	NA	FALSE
98	0.079079	NA	0.366366	0.166667	0.1997	TRUE	1.0616	2 vs 1	0.399399	2 vs 1	-0.267267	-0.666667	A830018L16Rik:ENSMUST00000135014.7, A830018L16Rik:ENSMUST00000048613.13	A830018L16Rik	NA	NA	FALSE	FALSE	0.079079	NA	FALSE
99	1.74996e-249	7.12157e-207	0.579327	0.382782	0.196545	FALSE	0.797769	1 vs 2	0.39309	1 vs 2	0.158654	-0.234436	1500011B03Rik:ENSMUST00000112160.3, 1500011B03Rik:ENSMUST00000100850.5	1500011B03Rik	3.26659e-248	1.25922e-205	TRUE	TRUE	7.12157e-207	1.26894e-205	TRUE
100	0.00104575	NA	0.473344	0.27907	0.194274	TRUE	0.842356	1 vs 2	0.388549	1 vs 2	-0.0533118	-0.44186	Wdr17:ENSMUST00000144711.8, Wdr17:ENSMUST00000129132.2	Wdr17	NA	NA	FALSE	FALSE	0.00104575	NA	FALSE
101	8.45289e-142	2.47361e-144	0.617342	0.423541	0.193801	FALSE	1.27605	1 vs 3	0.387602	1 vs 3	0.234685	-0.152918	Tpm1:ENSMUST00000113690.7, Tpm1:ENSMUST00000113685.9, Tpm1:ENSMUST00000030185.4	Tpm1	9.20426e-141	3.00698e-143	TRUE	TRUE	8.45289e-142	1.03548e-140	TRUE
102	7.77309e-09	2.41577e-06	0.426678	0.235294	0.191384	TRUE	0.883236	2 vs 1	0.382767	2 vs 1	-0.146645	-0.529412	Snx29:ENSMUST00000122168.7, Snx29:ENSMUST00000180792.7	Snx29	NA	NA	FALSE	FALSE	2.41577e-06	NA	FALSE
103	1.04317e-09	2.51179e-10	0.585124	0.394336	0.190788	TRUE	0.772968	1 vs 2	0.381577	1 vs 2	0.170248	-0.211329	Txlng:ENSMUST00000041370.10, Txlng:ENSMUST00000112314.7	Txlng	NA	NA	FALSE	FALSE	1.04317e-09	NA	FALSE
104	1.56921e-62	1.55702e-65	0.432873	0.24218	0.190693	FALSE	0.870626	2 vs 1	0.381386	2 vs 1	-0.134254	-0.51564	Macrod2:ENSMUST00000110062.7, Macrod2:ENSMUST00000110064.7	Macrod2	1.04259e-61	1.08158e-64	TRUE	TRUE	1.56921e-62	1.11842e-61	TRUE
105	1.62506e-28	2.31795e-27	0.899402	0.711364	0.188039	TRUE	1.55803	2 vs 3	0.376078	1 vs 3	0.798805	0.422727	Nrg1:ENSMUST00000207470.2, Nrg1:ENSMUST00000208598.1, Nrg1:ENSMUST00000239080.1	Nrg1	NA	NA	FALSE	FALSE	2.31795e-27	NA	FALSE
106	0.619675	NA	0.937037	0.75	0.187037	TRUE	1.60156	2 vs 1	0.374074	2 vs 1	0.874074	0.5	Kcnmb2:ENSMUST00000194796.1, Kcnmb2:ENSMUST00000119970.7	Kcnmb2	NA	NA	FALSE	FALSE	0.619675	NA	FALSE
107	5.97453e-169	1.26773e-126	0.88684	0.70006	0.18678	FALSE	1.21128	2 vs 1	0.373561	2 vs 1	0.77368	0.400119	Gnao1:ENSMUST00000138659.8, Gnao1:ENSMUST00000125716.7	Gnao1	7.55488e-168	1.26448e-125	TRUE	TRUE	1.26773e-126	1.30777e-125	TRUE
108	0	9.08373e-244	0.990047	0.803484	0.186564	FALSE	3.19169	1 vs 2	0.373127	1 vs 2	0.980095	0.606967	Kif1b:ENSMUST00000238956.1, Kif1b:ENSMUST00000030806.5	Kif1b	0	1.85977e-242	TRUE	TRUE	9.08373e-244	1.97823e-242	TRUE
109	0.0352588	NA	0.760673	0.580645	0.180028	TRUE	0.830953	1 vs 2	0.360057	1 vs 2	0.521347	0.16129	Dusp15:ENSMUST00000123121.8, Dusp15:ENSMUST00000109811.3	Dusp15	NA	NA	FALSE	FALSE	0.0352588	NA	FALSE
110	0.00050395	NA	0.668639	0.48927	0.179369	TRUE	0.744961	1 vs 2	0.358737	1 vs 2	0.337278	-0.0214592	Ranbp17:ENSMUST00000102815.9, Ranbp17:ENSMUST00000037522.13	Ranbp17	NA	NA	FALSE	FALSE	0.00050395	NA	FALSE
111	0.438368	NA	1	0.823529	0.176471	TRUE	Inf	1 vs 2	0.352941	1 vs 2	1	0.647059	Birc3:ENSMUST00000013949.14, Birc3:ENSMUST00000115672.1	Birc3	NA	NA	FALSE	FALSE	0.438368	NA	FALSE
112	0.00537621	0.00537555	0.52	0.366667	0.153333	TRUE	2.11021	1 vs 3	0.352	1 vs 2	-0.248	-0.6	Rgs9:ENSMUST00000020920.9, Rgs9:ENSMUST00000106706.7, Rgs9:ENSMUST00000106704.2	Rgs9	NA	NA	FALSE	FALSE	0.00537621	NA	FALSE
113	1.35288e-36	7.05489e-32	0.737677	0.561865	0.175812	FALSE	0.785193	1 vs 2	0.351623	1 vs 2	0.475353	0.12373	Tut7:ENSMUST00000071703.5, Tut7:ENSMUST00000225576.1	Tut7	6.09573e-36	2.8587e-31	TRUE	TRUE	7.05489e-32	2.97368e-31	TRUE
114	7.41851e-18	1.31635e-16	0.814729	0.640669	0.17406	TRUE	0.902767	1 vs 2	0.34812	1 vs 2	0.629457	0.281337	Crem:ENSMUST00000151311.7, Crem:ENSMUST00000149803.7	Crem	NA	NA	FALSE	FALSE	1.31635e-16	NA	FALSE
115	0.408532	NA	1	0.826087	0.173913	TRUE	Inf	2 vs 1	0.347826	2 vs 1	1	0.652174	Adra1a:ENSMUST00000159068.1, Adra1a:ENSMUST00000159365.7	Adra1a	NA	NA	FALSE	FALSE	0.408532	NA	FALSE
116	3.32307e-05	NA	0.631229	0.457895	0.173334	TRUE	0.706315	2 vs 1	0.346669	2 vs 1	0.262458	-0.0842105	Fam71e1:ENSMUST00000205422.1, Fam71e1:ENSMUST00000205359.1	Fam71e1	NA	NA	FALSE	FALSE	3.32307e-05	NA	FALSE
117	4.41841e-36	7.46853e-34	0.767473	0.598726	0.168747	FALSE	0.793935	2 vs 1	0.337493	2 vs 1	0.534945	0.197452	Nsd1:ENSMUST00000224918.1, Nsd1:ENSMUST00000099490.2	Nsd1	1.94609e-35	3.26434e-33	TRUE	TRUE	7.46853e-34	3.40426e-33	TRUE
118	8.60554e-40	5.40979e-37	0.631203	0.466326	0.164877	FALSE	0.672281	1 vs 2	0.329754	1 vs 2	0.262405	-0.0673487	Epc1:ENSMUST00000115870.8, Epc1:ENSMUST00000050542.5	Epc1	4.11387e-39	2.50525e-36	TRUE	TRUE	5.40979e-37	2.58614e-36	TRUE
119	2.73237e-29	NA	0.981022	0.841954	0.139068	TRUE	2.36559	1 vs 3	0.328308	1 vs 2	0.954745	0.626437	Ttc39b:ENSMUST00000102823.9, Ttc39b:ENSMUST00000048274.10, Ttc39b:ENSMUST00000030205.13	Ttc39b	NA	NA	FALSE	FALSE	2.73237e-29	NA	FALSE
120	2.53144e-58	1.71931e-53	0.758492	0.597118	0.161374	FALSE	0.750956	1 vs 2	0.322747	1 vs 2	0.516983	0.194236	Cinp:ENSMUST00000043716.8, Cinp:ENSMUST00000222457.1	Cinp	1.55051e-57	9.98223e-53	TRUE	TRUE	1.71931e-53	1.03687e-52	TRUE
121	8.98418e-05	NA	0.415929	0.255193	0.160736	TRUE	0.731599	2 vs 1	0.321473	2 vs 1	-0.168142	-0.489614	Ggnbp1:ENSMUST00000142141.2, Ggnbp1:ENSMUST00000236222.1	Ggnbp1	NA	NA	FALSE	FALSE	8.98418e-05	NA	FALSE
122	9.11256e-05	NA	0.277108	0.117391	0.159717	TRUE	1.05852	1 vs 2	0.319434	1 vs 2	-0.445783	-0.765217	Prss41:ENSMUST00000024926.13, Prss41:ENSMUST00000151797.2	Prss41	NA	NA	FALSE	FALSE	9.11256e-05	NA	FALSE
123	6.18395e-47	2.80565e-40	0.825839	0.670037	0.155802	FALSE	0.848066	1 vs 2	0.311603	1 vs 2	0.651678	0.340075	Ndel1:ENSMUST00000018880.13, Ndel1:ENSMUST00000101017.8	Ndel1	3.18961e-46	1.36425e-39	TRUE	TRUE	2.80565e-40	1.39217e-39	TRUE
124	0.0586905	NA	0.754717	0.601064	0.153653	TRUE	0.71403	1 vs 2	0.307306	1 vs 2	0.509434	0.202128	Cadps2:ENSMUST00000166458.8, Cadps2:ENSMUST00000115356.2	Cadps2	NA	NA	FALSE	FALSE	0.0586905	NA	FALSE
125	7.86974e-20	8.20516e-21	0.336269	0.183516	0.152753	FALSE	0.812738	2 vs 1	0.305506	2 vs 1	-0.327461	-0.632967	Umad1:ENSMUST00000162034.7, Umad1:ENSMUST00000159335.7	Umad1	2.44836e-19	2.65984e-20	TRUE	TRUE	7.86974e-20	2.54954e-19	TRUE
126	0.426761	NA	0.391892	0.363636	0.0282555	TRUE	-1.50408	3 vs 2	0.304668	2 vs 1	0.486486	0.181818	Lrguk:ENSMUST00000101564.8, Lrguk:ENSMUST00000228187.1, Lrguk:ENSMUST00000070189.9	Lrguk	NA	NA	FALSE	FALSE	0.426761	NA	FALSE
127	4.24686e-43	3.1486e-41	0.304151	0.216427	0.087724	FALSE	0.774076	1 vs 3	0.304219	2 vs 3	0.0900861	-0.214133	Ubap2l:ENSMUST00000198322.4, Ubap2l:ENSMUST00000064639.14, Ubap2l:ENSMUST00000090908.10	Ubap2l	2.1073e-42	1.57026e-40	TRUE	TRUE	3.1486e-41	1.60292e-40	TRUE
128	7.42941e-140	1.51495e-134	0.22731	0.0762332	0.151077	FALSE	1.2711	2 vs 1	0.302155	2 vs 1	-0.545379	-0.847534	Eif4e2:ENSMUST00000113233.7, Eif4e2:ENSMUST00000113235.7	Eif4e2	7.66403e-139	1.63699e-133	TRUE	TRUE	1.51495e-134	1.64961e-133	TRUE
129	1	NA	0.75	0.6	0.15	TRUE	0.693147	1 vs 2	0.3	1 vs 2	0.5	0.2	Susd3:ENSMUST00000058196.12, Susd3:ENSMUST00000119721.1	Susd3	NA	NA	FALSE	FALSE	1	NA	FALSE
130	0.218879	NA	0.899105	0.75	0.149105	TRUE	1.08871	2 vs 1	0.29821	2 vs 1	0.79821	0.5	Lrfn5:ENSMUST00000055815.13, Lrfn5:ENSMUST00000119481.1	Lrfn5	NA	NA	FALSE	FALSE	0.218879	NA	FALSE
131	6.4591e-13	NA	0.951049	0.802326	0.148723	TRUE	1.56585	2 vs 1	0.297447	2 vs 1	0.902098	0.604651	Btbd8:ENSMUST00000162298.3, Btbd8:ENSMUST00000100951.8	Btbd8	NA	NA	FALSE	FALSE	6.4591e-13	NA	FALSE
132	1.72262e-07	NA	0.16545	0.0192308	0.146219	TRUE	2.3136	1 vs 2	0.292439	1 vs 2	-0.6691	-0.961538	Armc2:ENSMUST00000160262.8, Armc2:ENSMUST00000162405.7	Armc2	NA	NA	FALSE	FALSE	1.72262e-07	NA	FALSE
133	0.168367	NA	0.507143	0.361111	0.146032	TRUE	0.599118	2 vs 1	0.292063	2 vs 1	0.0142857	-0.277778	Ccdc171:ENSMUST00000126429.7, Ccdc171:ENSMUST00000053414.12	Ccdc171	NA	NA	FALSE	FALSE	0.168367	NA	FALSE
134	0.0653146	NA	0.145455	0	0.145455	TRUE	Inf	1 vs 2	0.290909	1 vs 2	-0.709091	-1	Tnk1:ENSMUST00000001626.9, Tnk1:ENSMUST00000108626.7	Tnk1	NA	NA	FALSE	FALSE	0.0653146	NA	FALSE
135	3.57692e-05	0.00112652	0.893246	0.748148	0.145098	TRUE	1.03558	2 vs 1	0.290196	2 vs 1	0.786492	0.496296	Gcnt2:ENSMUST00000223570.1, Gcnt2:ENSMUST00000067778.7	Gcnt2	NA	NA	FALSE	FALSE	0.00112652	NA	FALSE
136	1.85016e-160	2.18354e-136	0.697327	0.552627	0.144701	FALSE	0.863649	2 vs 3	0.289402	1 vs 3	0.394655	0.105253	Mkrn1:ENSMUST00000114823.7, Mkrn1:ENSMUST00000051671.10, Mkrn1:ENSMUST00000114822.1	Mkrn1	2.26645e-159	2.42685e-135	TRUE	TRUE	2.18354e-136	2.44557e-135	TRUE
137	0.678902	NA	1	0.856195	0.143805	TRUE	Inf	2 vs 1	0.287611	2 vs 1	1	0.712389	Mdfic:ENSMUST00000125326.7, Mdfic:ENSMUST00000189359.6	Mdfic	NA	NA	FALSE	FALSE	0.678902	NA	FALSE
138	3.04736e-07	1.21213e-06	0.8086	0.664948	0.143652	TRUE	1.12646	3 vs 2	0.287304	3 vs 1	0.617201	0.329897	Wdcp:ENSMUST00000053034.5, Wdcp:ENSMUST00000220215.1, Wdcp:ENSMUST00000223551.1	Wdcp	NA	NA	FALSE	FALSE	1.21213e-06	NA	FALSE
139	0.0218284	0.0534276	0.438356	0.295711	0.142645	TRUE	0.61997	1 vs 2	0.28529	1 vs 2	-0.123288	-0.408578	Rassf4:ENSMUST00000035842.6, Rassf4:ENSMUST00000203029.2	Rassf4	NA	NA	FALSE	FALSE	0.0534276	NA	FALSE
140	4.69117e-27	5.60306e-27	0.718217	0.575791	0.142426	FALSE	0.630114	2 vs 1	0.284851	2 vs 1	0.436434	0.151583	Nrf1:ENSMUST00000115204.7, Nrf1:ENSMUST00000115208.7	Nrf1	1.70272e-26	2.037e-26	TRUE	TRUE	5.60306e-27	2.09181e-26	TRUE
141	9.83796e-26	1.02513e-18	0.91013	0.768248	0.141882	TRUE	1.11678	2 vs 1	0.283764	2 vs 1	0.82026	0.536496	Dlg4:ENSMUST00000231221.1, Dlg4:ENSMUST00000231415.1	Dlg4	NA	NA	FALSE	FALSE	1.02513e-18	NA	FALSE
142	5.59732e-15	5.35804e-15	0.386713	0.245229	0.141484	TRUE	0.663071	2 vs 1	0.282968	2 vs 1	-0.226574	-0.509542	Dnm2:ENSMUST00000072362.13, Dnm2:ENSMUST00000165766.8	Dnm2	NA	NA	FALSE	FALSE	5.59732e-15	NA	FALSE
143	4.60185e-05	7.16134e-05	0.771296	0.63285	0.138446	TRUE	0.941089	2 vs 3	0.276892	1 vs 3	0.542593	0.2657	Dixdc1:ENSMUST00000034566.14, Dixdc1:ENSMUST00000120622.1, Dixdc1:ENSMUST00000117093.1	Dixdc1	NA	NA	FALSE	FALSE	7.16134e-05	NA	FALSE
144	0.164477	NA	0.181818	0.0434783	0.13834	TRUE	1.58697	2 vs 1	0.27668	2 vs 1	-0.636364	-0.913043	Adamtsl1:ENSMUST00000120678.1, Adamtsl1:ENSMUST00000141889.7	Adamtsl1	NA	NA	FALSE	FALSE	0.164477	NA	FALSE
145	3.79903e-10	8.86296e-10	0.234663	0.0963636	0.138299	TRUE	1.05613	2 vs 1	0.276598	2 vs 1	-0.530675	-0.807273	Lrrcc1:ENSMUST00000169079.7, Lrrcc1:ENSMUST00000108370.8	Lrrcc1	NA	NA	FALSE	FALSE	8.86296e-10	NA	FALSE
146	1.33782e-22	1.15617e-19	0.745075	0.607349	0.137726	FALSE	0.636333	1 vs 2	0.275452	1 vs 2	0.49015	0.214697	Zfp467:ENSMUST00000114566.7, Zfp467:ENSMUST00000114559.7	Zfp467	4.48228e-22	3.598e-19	TRUE	TRUE	1.15617e-19	3.71491e-19	TRUE
147	0.0049941	NA	0.606322	0.46875	0.137572	TRUE	0.55704	1 vs 2	0.275144	1 vs 2	0.212644	-0.0625	Tmem241:ENSMUST00000055447.13, Tmem241:ENSMUST00000092075.4	Tmem241	NA	NA	FALSE	FALSE	0.0049941	NA	FALSE
148	2.90269e-05	0.000390717	0.701111	0.563981	0.13713	TRUE	0.595258	2 vs 1	0.274259	2 vs 1	0.402221	0.127962	Cacna2d1:ENSMUST00000196750.1, Cacna2d1:ENSMUST00000167946.8	Cacna2d1	NA	NA	FALSE	FALSE	0.000390717	NA	FALSE
149	2.85059e-25	6.78535e-24	0.743842	0.697581	0.0462613	FALSE	-0.72743	2 vs 1	0.27401	3 vs 2	0.349816	0.0758065	Ccdc88a:ENSMUST00000109477.1, Ccdc88a:ENSMUST00000239407.1, Ccdc88a:ENSMUST00000040182.12	Ccdc88a	9.88876e-25	2.29522e-23	TRUE	TRUE	6.78535e-24	2.35385e-23	TRUE
150	9.23966e-09	1.44932e-06	0.810222	0.674221	0.136001	TRUE	0.724118	1 vs 2	0.272003	1 vs 2	0.620445	0.348442	Atp8a1:ENSMUST00000135930.7, Atp8a1:ENSMUST00000113651.7	Atp8a1	NA	NA	FALSE	FALSE	1.44932e-06	NA	FALSE
151	7.69532e-14	2.96555e-13	0.774791	0.639959	0.134831	TRUE	0.660376	2 vs 1	0.269663	2 vs 1	0.549582	0.279919	Mtor:ENSMUST00000057580.7, Mtor:ENSMUST00000103221.9	Mtor	NA	NA	FALSE	FALSE	2.96555e-13	NA	FALSE
152	0.242344	NA	0.666667	0.533333	0.133333	TRUE	0.559616	2 vs 1	0.266667	2 vs 1	0.333333	0.0666667	Dab2:ENSMUST00000160134.7, Dab2:ENSMUST00000078019.12	Dab2	NA	NA	FALSE	FALSE	0.242344	NA	FALSE
153	1	NA	0.133333	0	0.133333	TRUE	Inf	2 vs 1	0.266667	2 vs 1	-0.733333	-1	Zfp92:ENSMUST00000033740.11, Zfp92:ENSMUST00000086470.2	Zfp92	NA	NA	FALSE	FALSE	1	NA	FALSE
154	1.55709e-26	3.90239e-25	0.945678	0.813126	0.132552	FALSE	1.38651	2 vs 1	0.265104	2 vs 1	0.891355	0.626251	Vti1a:ENSMUST00000225529.1, Vti1a:ENSMUST00000223690.1	Vti1a	5.54889e-26	1.38003e-24	TRUE	TRUE	3.90239e-25	1.40343e-24	TRUE
155	2.30881e-98	1.52249e-74	0.854983	0.723842	0.13114	FALSE	0.810626	2 vs 1	0.262281	2 vs 1	0.709965	0.447684	Thra:ENSMUST00000103139.10, Thra:ENSMUST00000064187.11	Thra	2.15489e-97	1.1845e-73	TRUE	TRUE	1.52249e-74	1.19364e-73	TRUE
156	3.60614e-30	2.93036e-24	0.915935	0.785781	0.130154	FALSE	1.08867	2 vs 1	0.260307	2 vs 1	0.83187	0.571562	Cep70:ENSMUST00000190715.6, Cep70:ENSMUST00000093795.9	Cep70	1.38589e-29	9.9992e-24	TRUE	TRUE	2.93036e-24	1.03486e-23	TRUE
157	3.44059e-10	1.54685e-09	0.187629	0.0579439	0.129685	TRUE	1.3231	2 vs 1	0.25937	2 vs 1	-0.624742	-0.884112	Klhl15:ENSMUST00000096369.9, Klhl15:ENSMUST00000113915.1	Klhl15	NA	NA	FALSE	FALSE	1.54685e-09	NA	FALSE
158	0.00104301	0.0016948	0.232848	0.103448	0.1294	TRUE	0.967186	2 vs 1	0.2588	2 vs 1	-0.534304	-0.793103	Cdh7:ENSMUST00000146282.2, Cdh7:ENSMUST00000112701.7	Cdh7	NA	NA	FALSE	FALSE	0.0016948	NA	FALSE
159	5.0809e-06	NA	0.893162	0.764706	0.128457	TRUE	0.944803	1 vs 2	0.256913	1 vs 2	0.786325	0.529412	Foxo3:ENSMUST00000105502.7, Foxo3:ENSMUST00000105501.1	Foxo3	NA	NA	FALSE	FALSE	5.0809e-06	NA	FALSE
160	0.000510039	0.00140248	0.731595	0.688679	0.0429158	TRUE	1.31128	2 vs 1	0.253617	2 vs 1	0.168712	-0.0849057	Dtna:ENSMUST00000047954.14, Dtna:ENSMUST00000221880.1, Dtna:ENSMUST00000220904.1	Dtna	NA	NA	FALSE	FALSE	0.00140248	NA	FALSE
161	6.21654e-13	1.11737e-12	0.793981	0.709603	0.0843785	TRUE	0.614779	1 vs 2	0.253036	1 vs 2	0.429398	0.176362	Dido1:ENSMUST00000087517.9, Dido1:ENSMUST00000103057.7, Dido1:ENSMUST00000103055.7	Dido1	NA	NA	FALSE	FALSE	1.11737e-12	NA	FALSE
162	1.2337e-31	9.91049e-30	0.262591	0.136961	0.12563	FALSE	0.808217	2 vs 1	0.25126	2 vs 1	-0.474818	-0.726077	Smarcad1:ENSMUST00000204696.2, Smarcad1:ENSMUST00000031984.8	Smarcad1	5.03761e-31	3.85518e-29	TRUE	TRUE	9.91049e-30	4.04678e-29	TRUE
163	5.43312e-06	9.14728e-06	0.711681	0.588957	0.122724	TRUE	0.543907	2 vs 1	0.245448	2 vs 1	0.423362	0.177914	Evi5l:ENSMUST00000239400.1, Evi5l:ENSMUST00000176072.8	Evi5l	NA	NA	FALSE	FALSE	9.14728e-06	NA	FALSE
164	1.71802e-06	6.94139e-09	0.730441	0.609023	0.121418	TRUE	0.579106	1 vs 3	0.242837	1 vs 3	0.460882	0.218045	Cep41:ENSMUST00000031810.14, Cep41:ENSMUST00000169422.7, Cep41:ENSMUST00000115130.2	Cep41	NA	NA	FALSE	FALSE	1.71802e-06	NA	FALSE
165	0.0450671	0.00619576	0.492188	0.370787	0.121401	TRUE	0.497592	2 vs 1	0.242802	2 vs 1	-0.015625	-0.258427	Aifm2:ENSMUST00000099706.8, Aifm2:ENSMUST00000067857.10	Aifm2	NA	NA	FALSE	FALSE	0.0450671	NA	FALSE
166	2.54612e-05	0.000268976	0.77145	0.652027	0.119423	TRUE	0.588557	1 vs 2	0.238846	1 vs 2	0.542901	0.304054	Zfp810:ENSMUST00000086278.6, Zfp810:ENSMUST00000215202.1	Zfp810	NA	NA	FALSE	FALSE	0.000268976	NA	FALSE
167	3.77023e-09	3.06639e-10	0.91119	0.791866	0.119324	TRUE	0.992043	2 vs 1	0.238648	2 vs 1	0.82238	0.583732	Sass6:ENSMUST00000198386.4, Sass6:ENSMUST00000197335.1	Sass6	NA	NA	FALSE	FALSE	3.77023e-09	NA	FALSE
168	2.04388e-07	4.85376e-07	0.459121	0.340952	0.118169	TRUE	0.495173	2 vs 1	0.236338	2 vs 1	-0.0817573	-0.318095	Add2:ENSMUST00000203366.2, Add2:ENSMUST00000204059.2	Add2	NA	NA	FALSE	FALSE	4.85376e-07	NA	FALSE
169	0.000659937	8.80886e-05	0.136275	0.0185185	0.117756	TRUE	2.12371	2 vs 1	0.235512	2 vs 1	-0.727451	-0.962963	Frmd3:ENSMUST00000084474.5, Frmd3:ENSMUST00000098006.8	Frmd3	NA	NA	FALSE	FALSE	0.000659937	NA	FALSE
170	6.42313e-08	3.12999e-09	0.775992	0.65884	0.117153	TRUE	0.584335	2 vs 1	0.234305	2 vs 1	0.551985	0.31768	Kdm3b:ENSMUST00000224715.1, Kdm3b:ENSMUST00000043775.8	Kdm3b	NA	NA	FALSE	FALSE	6.42313e-08	NA	FALSE
171	8.09976e-18	4.39849e-17	0.467612	0.420519	0.0470938	TRUE	0.760914	3 vs 2	0.231464	3 vs 2	-0.0278373	-0.259301	Cklf:ENSMUST00000212433.1, Cklf:ENSMUST00000034342.12, Cklf:ENSMUST00000098464.5	Cklf	NA	NA	FALSE	FALSE	4.39849e-17	NA	FALSE
172	4.78948e-09	1.50637e-09	0.359675	0.244755	0.11492	TRUE	1.35107	3 vs 2	0.231206	3 vs 2	0.245192	0.013986	Cdkl3:ENSMUST00000109077.8, Cdkl3:ENSMUST00000109078.7, Cdkl3:ENSMUST00000121591.7	Cdkl3	NA	NA	FALSE	FALSE	4.78948e-09	NA	FALSE
173	8.96205e-13	6.08738e-13	0.27727	0.162041	0.115229	TRUE	0.685076	1 vs 2	0.230458	1 vs 2	-0.445459	-0.675918	Ccdc9:ENSMUST00000118976.8, Ccdc9:ENSMUST00000041010.14	Ccdc9	NA	NA	FALSE	FALSE	8.96205e-13	NA	FALSE
174	0.673298	NA	0.296875	0.181818	0.115057	TRUE	0.641854	1 vs 2	0.230114	1 vs 2	-0.40625	-0.636364	Aldh1a3:ENSMUST00000015278.14, Aldh1a3:ENSMUST00000174209.7	Aldh1a3	NA	NA	FALSE	FALSE	0.673298	NA	FALSE
175	0.027382	0.0786757	0.686957	0.574869	0.112087	TRUE	0.484184	2 vs 1	0.224175	2 vs 1	0.373913	0.149738	Pole:ENSMUST00000112482.1, Pole:ENSMUST00000007296.11	Pole	NA	NA	FALSE	FALSE	0.0786757	NA	FALSE
176	4.53958e-36	1.04906e-33	0.67641	0.676402	8.17613e-06	FALSE	-0.984926	2 vs 1	0.221699	3 vs 2	0.19226	-0.0294393	Hmg20a:ENSMUST00000214771.1, Hmg20a:ENSMUST00000217518.1, Hmg20a:ENSMUST00000034879.4	Hmg20a	1.97724e-35	4.38799e-33	TRUE	TRUE	1.04906e-33	4.56922e-33	TRUE
177	0.115405	NA	0.887755	0.777778	0.109977	TRUE	0.81525	2 vs 1	0.219955	2 vs 1	0.77551	0.555556	Drc3:ENSMUST00000094140.8, Drc3:ENSMUST00000108723.8	Drc3	NA	NA	FALSE	FALSE	0.115405	NA	FALSE
178	2.51591e-07	1.86394e-06	0.711044	0.602424	0.10862	TRUE	0.484883	1 vs 2	0.217239	1 vs 2	0.422088	0.204848	Cep97:ENSMUST00000023270.13, Cep97:ENSMUST00000122280.7	Cep97	NA	NA	FALSE	FALSE	1.86394e-06	NA	FALSE
179	6.946e-06	9.76079e-06	0.895706	0.787879	0.107827	TRUE	0.838207	2 vs 1	0.215653	2 vs 1	0.791411	0.575758	Mosmo:ENSMUST00000208454.1, Mosmo:ENSMUST00000060175.7	Mosmo	NA	NA	FALSE	FALSE	9.76079e-06	NA	FALSE
180	6.44272e-11	NA	0.966292	0.858676	0.107616	TRUE	1.5514	1 vs 2	0.215232	1 vs 2	0.932584	0.717352	Rrbp1:ENSMUST00000016072.11, Rrbp1:ENSMUST00000037875.5	Rrbp1	NA	NA	FALSE	FALSE	6.44272e-11	NA	FALSE
181	4.2893e-06	NA	0.957746	0.851852	0.105895	TRUE	1.3717	1 vs 2	0.211789	1 vs 2	0.915493	0.703704	Adamts3:ENSMUST00000061427.9, Adamts3:ENSMUST00000198151.1	Adamts3	NA	NA	FALSE	FALSE	4.2893e-06	NA	FALSE
182	0.0197972	0.0333134	0.766102	0.660606	0.105496	TRUE	0.520432	2 vs 1	0.210991	2 vs 1	0.532203	0.321212	Neurl1a:ENSMUST00000235326.1, Neurl1a:ENSMUST00000111808.10	Neurl1a	NA	NA	FALSE	FALSE	0.0333134	NA	FALSE
183	0.00133009	0.000509011	0.26875	0.163793	0.104957	TRUE	0.629298	2 vs 1	0.209914	2 vs 1	-0.4625	-0.672414	Phka2:ENSMUST00000112377.7, Phka2:ENSMUST00000112380.8	Phka2	NA	NA	FALSE	FALSE	0.00133009	NA	FALSE
184	0.000210823	0.00316588	0.591497	0.486692	0.104805	TRUE	0.423403	2 vs 1	0.20961	2 vs 1	0.182994	-0.026616	Gpatch2:ENSMUST00000044812.11, Gpatch2:ENSMUST00000110943.8	Gpatch2	NA	NA	FALSE	FALSE	0.00316588	NA	FALSE
185	0.448069	NA	0.509434	0.405405	0.104029	TRUE	0.420733	1 vs 2	0.208057	1 vs 2	0.0188679	-0.189189	4930447C04Rik:ENSMUST00000110489.8, 4930447C04Rik:ENSMUST00000136075.7	4930447C04Rik	NA	NA	FALSE	FALSE	0.448069	NA	FALSE
186	6.65508e-30	7.5432e-24	0.476331	0.372545	0.103786	FALSE	0.426567	2 vs 1	0.207572	2 vs 1	-0.0473381	-0.25491	Mthfd2l:ENSMUST00000202781.1, Mthfd2l:ENSMUST00000071652.5	Mthfd2l	2.50845e-29	2.52957e-23	TRUE	TRUE	7.5432e-24	2.5938e-23	TRUE
187	0.0101248	NA	0.400966	0.297571	0.103395	TRUE	0.457451	1 vs 2	0.206791	1 vs 2	-0.198068	-0.404858	Mcm9:ENSMUST00000237608.1, Mcm9:ENSMUST00000219838.2	Mcm9	NA	NA	FALSE	FALSE	0.0101248	NA	FALSE
188	3.07492e-14	3.22862e-10	0.956885	0.889197	0.0676879	TRUE	1.28802	1 vs 2	0.204547	1 vs 2	0.894298	0.689751	Agtpbp1:ENSMUST00000164215.7, Agtpbp1:ENSMUST00000109830.8, Agtpbp1:ENSMUST00000167096.7	Agtpbp1	NA	NA	FALSE	FALSE	3.22862e-10	NA	FALSE
189	0.00206039	NA	0.897742	0.795918	0.101824	TRUE	0.811411	2 vs 1	0.203648	2 vs 1	0.795485	0.591837	Gnal:ENSMUST00000237445.1, Gnal:ENSMUST00000025402.14	Gnal	NA	NA	FALSE	FALSE	0.00206039	NA	FALSE
190	5.94918e-56	1.55828e-48	0.804087	0.702738	0.10135	FALSE	0.551669	1 vs 2	0.202699	1 vs 2	0.608175	0.405476	Gm20498:ENSMUST00000164386.7, Gm20498:ENSMUST00000166664.1	Gm20498	3.28462e-55	8.53762e-48	TRUE	TRUE	1.55828e-48	8.60346e-48	TRUE
191	5.82402e-06	4.1848e-05	0.727612	0.626415	0.101197	TRUE	0.465672	1 vs 2	0.202394	1 vs 2	0.455224	0.25283	Tm7sf2:ENSMUST00000113543.8, Tm7sf2:ENSMUST00000161528.1	Tm7sf2	NA	NA	FALSE	FALSE	4.1848e-05	NA	FALSE
192	0.000180848	NA	0.977106	0.877551	0.0995552	TRUE	1.78429	2 vs 1	0.19911	2 vs 1	0.954212	0.755102	6430548M08Rik:ENSMUST00000108948.7, 6430548M08Rik:ENSMUST00000034281.12	6430548M08Rik	NA	NA	FALSE	FALSE	0.000180848	NA	FALSE
193	1	NA	0.0992556	0	0.0992556	TRUE	Inf	2 vs 1	0.198511	2 vs 1	-0.801489	-1	Rasgrf1:ENSMUST00000189545.1, Rasgrf1:ENSMUST00000034912.5	Rasgrf1	NA	NA	FALSE	FALSE	1	NA	FALSE
194	1.27375e-06	2.33106e-06	0.656348	0.595579	0.060769	TRUE	0.609821	1 vs 3	0.198111	1 vs 2	-0.224515	-0.422627	Gm14326:ENSMUST00000108932.7, Gm14326:ENSMUST00000178829.7, Gm14326:ENSMUST00000108928.1	Gm14326	NA	NA	FALSE	FALSE	2.33106e-06	NA	FALSE
195	0.00129429	NA	0.125	0.0264901	0.0985099	TRUE	1.65823	1 vs 2	0.19702	1 vs 2	-0.75	-0.94702	Hdac9:ENSMUST00000209902.1, Hdac9:ENSMUST00000239340.1	Hdac9	NA	NA	FALSE	FALSE	0.00129429	NA	FALSE
196	0.560058	0.716049	0.765133	0.666667	0.0984665	TRUE	0.487884	2 vs 1	0.196933	2 vs 1	0.530266	0.333333	Syt6:ENSMUST00000118117.7, Syt6:ENSMUST00000090697.10	Syt6	NA	NA	FALSE	FALSE	0.716049	NA	FALSE
197	0.118853	0.0298665	0.35	0.255034	0.0949664	TRUE	0.452905	1 vs 2	0.189933	1 vs 2	-0.3	-0.489933	Sorcs1:ENSMUST00000209413.1, Sorcs1:ENSMUST00000211687.1	Sorcs1	NA	NA	FALSE	FALSE	0.118853	NA	FALSE
198	3.97179e-24	1.38442e-24	0.5999	0.553122	0.0467776	FALSE	0.659047	1 vs 2	0.188708	1 vs 2	-0.523377	-0.712084	Stau2:ENSMUST00000162751.7, Stau2:ENSMUST00000159558.7, Stau2:ENSMUST00000115359.9	Stau2	1.36574e-23	4.76584e-24	FALSE	FALSE	3.97179e-24	1.39013e-23	FALSE
199	0.0328896	0.0563194	0.520961	0.427632	0.0933296	TRUE	0.375415	1 vs 2	0.186659	1 vs 2	0.0419223	-0.144737	Slco5a1:ENSMUST00000188454.6, Slco5a1:ENSMUST00000136197.7	Slco5a1	NA	NA	FALSE	FALSE	0.0563194	NA	FALSE
200	2.26373e-15	1.51987e-12	0.630199	0.536975	0.0932238	FALSE	0.384899	2 vs 1	0.186448	2 vs 1	0.260397	0.0739496	Ptprz1:ENSMUST00000202579.3, Ptprz1:ENSMUST00000090568.6	Ptprz1	5.95558e-15	3.62718e-12	FALSE	FALSE	1.51987e-12	3.79484e-12	FALSE
201	0.000200608	0.000833074	0.75876	0.666667	0.0920934	TRUE	0.452747	1 vs 2	0.184187	1 vs 2	0.51752	0.333333	Zkscan14:ENSMUST00000031632.8, Zkscan14:ENSMUST00000198959.1	Zkscan14	NA	NA	FALSE	FALSE	0.000833074	NA	FALSE
202	3.1809e-08	7.17338e-08	0.159512	0.06914	0.0903722	FALSE	0.938114	1 vs 2	0.180744	1 vs 2	-0.680976	-0.86172	Rita1:ENSMUST00000111884.7, Rita1:ENSMUST00000031599.8	Rita1	6.74007e-08	1.51655e-07	FALSE	FALSE	7.17338e-08	1.55357e-07	FALSE
203	6.21659e-67	6.02321e-63	0.979708	0.889572	0.0901354	FALSE	1.79064	2 vs 1	0.180271	2 vs 1	0.959416	0.779145	Gorasp2:ENSMUST00000112205.1, Gorasp2:ENSMUST00000028509.10	Gorasp2	4.27527e-66	4.11058e-62	FALSE	FALSE	6.02321e-63	4.3724e-62	FALSE
204	4.7487e-18	3.84548e-13	0.90843	0.840586	0.0678437	FALSE	1.27098	1 vs 3	0.179124	1 vs 2	0.677348	0.498224	Srcin1:ENSMUST00000238233.1, Srcin1:ENSMUST00000107590.8, Srcin1:ENSMUST00000238342.1	Srcin1	1.41022e-17	9.34933e-13	FALSE	FALSE	3.84548e-13	9.72535e-13	FALSE
205	1.61748e-12	2.45608e-14	0.818794	0.730419	0.0883752	FALSE	0.51145	2 vs 1	0.17675	2 vs 1	0.637588	0.460838	Zfp932:ENSMUST00000099484.8, Zfp932:ENSMUST00000112540.7	Zfp932	3.96283e-12	6.24453e-14	FALSE	FALSE	1.61748e-12	4.01299e-12	FALSE
206	1.23494e-17	3.92943e-12	0.967623	0.879386	0.0882366	TRUE	1.41075	1 vs 2	0.176473	1 vs 2	0.935245	0.758772	Mpp3:ENSMUST00000100400.8, Mpp3:ENSMUST00000107167.1	Mpp3	NA	NA	FALSE	FALSE	3.92943e-12	NA	FALSE
207	2.0463e-17	8.7236e-16	0.817254	0.729539	0.0877147	FALSE	0.505567	1 vs 2	0.175429	1 vs 2	0.634508	0.459079	Gabpb1:ENSMUST00000110425.8, Gabpb1:ENSMUST00000039978.12	Gabpb1	5.89816e-17	2.37306e-15	FALSE	FALSE	8.7236e-16	2.46018e-15	FALSE
208	6.57645e-05	0.000110531	0.58949	0.50229	0.0871996	TRUE	0.352696	2 vs 1	0.174399	2 vs 1	0.178979	0.00458015	Nucb2:ENSMUST00000183175.7, Nucb2:ENSMUST00000032895.14	Nucb2	NA	NA	FALSE	FALSE	0.000110531	NA	FALSE
209	0.000416613	NA	0.691133	0.607759	0.083374	TRUE	1.53583	3 vs 1	0.170037	3 vs 2	-0.16617	-0.336207	Pcdh7:ENSMUST00000068110.9, Pcdh7:ENSMUST00000199310.1, Pcdh7:ENSMUST00000191837.5	Pcdh7	NA	NA	FALSE	FALSE	0.000416613	NA	FALSE
210	4.88315e-28	2.60086e-30	0.904506	0.820236	0.0842698	FALSE	0.730375	2 vs 1	0.16854	2 vs 1	0.809011	0.640472	Bcl7b:ENSMUST00000111187.9, Bcl7b:ENSMUST00000031692.11	Bcl7b	1.80584e-27	1.03238e-29	FALSE	FALSE	4.88315e-28	1.87666e-27	FALSE
211	0.514185	NA	0.820879	0.736842	0.0840373	TRUE	0.492698	1 vs 2	0.168075	1 vs 2	0.641759	0.473684	Hspa12a:ENSMUST00000066285.5, Hspa12a:ENSMUST00000235263.1	Hspa12a	NA	NA	FALSE	FALSE	0.514185	NA	FALSE
212	0.00173726	0.00107045	0.358685	0.274869	0.0838156	TRUE	0.444631	3 vs 2	0.167631	3 vs 1	-0.282631	-0.450262	Khdrbs2:ENSMUST00000189878.1, Khdrbs2:ENSMUST00000185666.1, Khdrbs2:ENSMUST00000027226.11	Khdrbs2	NA	NA	FALSE	FALSE	0.00173726	NA	FALSE
213	0.385685	0.471	0.72973	0.647127	0.0826026	TRUE	0.386817	2 vs 1	0.165205	2 vs 1	0.459459	0.294254	Etl4:ENSMUST00000114610.7, Etl4:ENSMUST00000114606.7	Etl4	NA	NA	FALSE	FALSE	0.471	NA	FALSE
214	0.000202519	0.000107194	0.711111	0.62963	0.0814815	TRUE	0.370158	1 vs 2	0.162963	1 vs 2	0.422222	0.259259	Zfp672:ENSMUST00000064786.11, Zfp672:ENSMUST00000065533.2	Zfp672	NA	NA	FALSE	FALSE	0.000202519	NA	FALSE
215	5.23721e-23	2.68028e-19	0.741309	0.660292	0.0810165	FALSE	0.388185	1 vs 2	0.162033	1 vs 2	0.482617	0.320584	Cux1:ENSMUST00000176216.8, Cux1:ENSMUST00000004097.15	Cux1	1.76982e-22	8.27483e-19	FALSE	FALSE	2.68028e-19	8.54203e-19	FALSE
216	0.0103247	NA	0.873023	0.812057	0.0609661	TRUE	0.698497	3 vs 2	0.159151	3 vs 2	0.747803	0.588652	Negr1:ENSMUST00000041425.11, Negr1:ENSMUST00000106065.1, Negr1:ENSMUST00000074015.10	Negr1	NA	NA	FALSE	FALSE	0.0103247	NA	FALSE
217	5.49698e-06	1.2531e-05	0.46392	0.425296	0.0386244	TRUE	0.687927	1 vs 2	0.15896	1 vs 2	-0.372106	-0.531065	Cdadc1:ENSMUST00000167100.8, Cdadc1:ENSMUST00000056997.14, Cdadc1:ENSMUST00000171683.2	Cdadc1	NA	NA	FALSE	FALSE	1.2531e-05	NA	FALSE
218	0.980256	NA	0.222222	0.142857	0.0793651	TRUE	0.538997	1 vs 2	0.15873	1 vs 2	-0.555556	-0.714286	Hcrtr2:ENSMUST00000063140.14, Hcrtr2:ENSMUST00000184757.1	Hcrtr2	NA	NA	FALSE	FALSE	0.980256	NA	FALSE
219	1.10217e-06	NA	0.960482	0.881279	0.0792037	TRUE	1.18609	1 vs 2	0.158407	1 vs 2	0.920965	0.762557	C2cd2l:ENSMUST00000065080.9, C2cd2l:ENSMUST00000214602.1	C2cd2l	NA	NA	FALSE	FALSE	1.10217e-06	NA	FALSE
220	0.00553089	0.0208743	0.65	0.570896	0.0791045	TRUE	0.333533	2 vs 1	0.158209	2 vs 1	0.3	0.141791	Hook1:ENSMUST00000107083.1, Hook1:ENSMUST00000030306.13	Hook1	NA	NA	FALSE	FALSE	0.0208743	NA	FALSE
221	0.0118363	NA	0.828502	0.75	0.0785024	TRUE	0.476438	2 vs 1	0.157005	2 vs 1	0.657005	0.5	BC024978:ENSMUST00000179391.7, BC024978:ENSMUST00000108379.7	BC024978	NA	NA	FALSE	FALSE	0.0118363	NA	FALSE
222	3.64755e-05	0.000218719	0.857554	0.780045	0.0775086	TRUE	0.52919	2 vs 1	0.155017	2 vs 1	0.715108	0.560091	Agap3:ENSMUST00000199856.1, Agap3:ENSMUST00000024123.8	Agap3	NA	NA	FALSE	FALSE	0.000218719	NA	FALSE
223	1.36982e-19	1.41669e-16	0.938345	0.861723	0.076622	FALSE	0.892893	1 vs 2	0.153244	1 vs 2	0.876691	0.723447	Kcnk10:ENSMUST00000221240.1, Kcnk10:ENSMUST00000221305.1	Kcnk10	4.22811e-19	4.05215e-16	FALSE	FALSE	1.41669e-16	4.17551e-16	FALSE
224	0.00194438	NA	0.16092	0.0847458	0.0761738	TRUE	0.728144	1 vs 2	0.152348	1 vs 2	-0.678161	-0.830508	BC055324:ENSMUST00000097493.9, BC055324:ENSMUST00000045876.7	BC055324	NA	NA	FALSE	FALSE	0.00194438	NA	FALSE
225	0.0127642	0.00255143	0.923246	0.847826	0.0754195	TRUE	0.769633	2 vs 1	0.150839	2 vs 1	0.846491	0.695652	Galnt10:ENSMUST00000108846.1, Galnt10:ENSMUST00000066987.13	Galnt10	NA	NA	FALSE	FALSE	0.0127642	NA	FALSE
226	0.0322134	0.0398766	0.868603	0.794118	0.0744854	TRUE	0.538737	1 vs 2	0.148971	1 vs 2	0.737206	0.588235	Tbc1d8:ENSMUST00000054462.10, Tbc1d8:ENSMUST00000193823.1	Tbc1d8	NA	NA	FALSE	FALSE	0.0398766	NA	FALSE
227	0.30409	NA	0.624	0.54955	0.0744505	TRUE	0.30771	1 vs 2	0.148901	1 vs 2	0.248	0.0990991	Prdm9:ENSMUST00000167994.9, Prdm9:ENSMUST00000147532.7	Prdm9	NA	NA	FALSE	FALSE	0.30409	NA	FALSE
228	1.65874e-07	1.77696e-07	0.125781	0.051676	0.0741053	TRUE	0.970917	1 vs 2	0.148211	1 vs 2	-0.748437	-0.896648	Ppcdc:ENSMUST00000214144.1, Ppcdc:ENSMUST00000085709.5	Ppcdc	NA	NA	FALSE	FALSE	1.77696e-07	NA	FALSE
229	0.00122168	NA	0.977492	0.904762	0.0727301	TRUE	1.51983	1 vs 2	0.14546	1 vs 2	0.954984	0.809524	Atp8a2:ENSMUST00000080368.12, Atp8a2:ENSMUST00000131670.2	Atp8a2	NA	NA	FALSE	FALSE	0.00122168	NA	FALSE
230	1	NA	0.272727	0.2	0.0727273	TRUE	0.405465	1 vs 2	0.145455	1 vs 2	-0.454545	-0.6	Ttc16:ENSMUST00000091059.11, Ttc16:ENSMUST00000066478.8	Ttc16	NA	NA	FALSE	FALSE	1	NA	FALSE
231	8.85704e-05	0.00261669	0.691667	0.619048	0.072619	TRUE	0.322415	2 vs 1	0.145238	2 vs 1	0.383333	0.238095	Gm4924:ENSMUST00000165906.1, Gm4924:ENSMUST00000211099.1	Gm4924	NA	NA	FALSE	FALSE	0.00261669	NA	FALSE
232	0.717988	NA	0.872549	0.8	0.072549	TRUE	0.537393	2 vs 1	0.145098	2 vs 1	0.745098	0.6	Gad1:ENSMUST00000130998.7, Gad1:ENSMUST00000094934.10	Gad1	NA	NA	FALSE	FALSE	0.717988	NA	FALSE
233	2.9029e-06	3.37155e-07	0.98913	0.917174	0.0719563	TRUE	2.1063	2 vs 1	0.143913	2 vs 1	0.978261	0.834348	Tlcd1:ENSMUST00000108338.1, Tlcd1:ENSMUST00000092880.13	Tlcd1	NA	NA	FALSE	FALSE	2.9029e-06	NA	FALSE
234	1.80561e-55	1.33409e-53	0.617241	0.572307	0.0449337	FALSE	0.551669	1 vs 2	0.143587	1 vs 2	0.416155	0.272569	Cox16:ENSMUST00000166723.7, Cox16:ENSMUST00000002757.10, Cox16:ENSMUST00000169124.1	Cox16	9.83055e-55	7.86303e-53	FALSE	FALSE	1.33409e-53	8.17128e-53	FALSE
235	2.35011e-12	7.52444e-12	0.556931	0.507373	0.0495574	TRUE	2.00548	2 vs 1	0.142971	2 vs 1	-0.331683	-0.474654	Pard3:ENSMUST00000162907.7, Pard3:ENSMUST00000162456.7, Pard3:ENSMUST00000160272.7	Pard3	NA	NA	FALSE	FALSE	7.52444e-12	NA	FALSE
236	0.00813143	NA	0.0854701	0.013986	0.0714841	TRUE	1.88537	2 vs 1	0.142968	2 vs 1	-0.82906	-0.972028	Larp1b:ENSMUST00000191805.6, Larp1b:ENSMUST00000026862.8	Larp1b	NA	NA	FALSE	FALSE	0.00813143	NA	FALSE
237	5.56055e-05	0.00129582	0.91725	0.845912	0.0713385	TRUE	0.702671	2 vs 1	0.142677	2 vs 1	0.834501	0.691824	Lrfn1:ENSMUST00000189877.6, Lrfn1:ENSMUST00000108288.8	Lrfn1	NA	NA	FALSE	FALSE	0.00129582	NA	FALSE
238	0.241661	NA	0.695312	0.624309	0.0710031	TRUE	0.317195	2 vs 1	0.142006	2 vs 1	0.390625	0.248619	Vwa8:ENSMUST00000227255.1, Vwa8:ENSMUST00000040990.6	Vwa8	NA	NA	FALSE	FALSE	0.241661	NA	FALSE
239	3.51613e-13	8.40589e-14	0.134091	0.0634049	0.070686	FALSE	0.827448	1 vs 2	0.141372	1 vs 2	-0.731818	-0.87319	Atp23:ENSMUST00000026504.12, Atp23:ENSMUST00000168520.2	Atp23	8.66871e-13	2.08273e-13	FALSE	FALSE	3.51613e-13	8.95016e-13	FALSE
240	0.0129044	0.081727	0.471471	0.416667	0.0548048	TRUE	0.647618	3 vs 1	0.141141	2 vs 1	0.537538	0.396396	Acrbp:ENSMUST00000112413.7, Acrbp:ENSMUST00000112414.7, Acrbp:ENSMUST00000088294.11	Acrbp	NA	NA	FALSE	FALSE	0.081727	NA	FALSE
241	6.25172e-08	4.12091e-08	0.876159	0.805912	0.0702471	TRUE	0.532886	2 vs 1	0.140494	2 vs 1	0.752318	0.611824	Cstf2:ENSMUST00000113286.7, Cstf2:ENSMUST00000033609.8	Cstf2	NA	NA	FALSE	FALSE	6.25172e-08	NA	FALSE
242	0.819092	0.864533	0.333333	0.263158	0.0701754	TRUE	0.336472	2 vs 1	0.140351	2 vs 1	-0.333333	-0.473684	Tulp2:ENSMUST00000210868.1, Tulp2:ENSMUST00000210813.1	Tulp2	NA	NA	FALSE	FALSE	0.864533	NA	FALSE
243	1.37172e-52	1.80172e-56	0.652782	0.583015	0.0697667	FALSE	0.296126	2 vs 1	0.139533	2 vs 1	0.305563	0.16603	Nop56:ENSMUST00000136621.8, Nop56:ENSMUST00000103198.10	Nop56	7.16953e-52	1.13043e-55	FALSE	FALSE	1.37172e-52	7.79296e-52	FALSE
244	0.00172614	0.00428817	0.724038	0.656023	0.0680145	TRUE	0.318957	1 vs 2	0.136029	1 vs 2	0.448076	0.312046	2510009E07Rik:ENSMUST00000053336.7, 2510009E07Rik:ENSMUST00000231592.1	2510009E07Rik	NA	NA	FALSE	FALSE	0.00428817	NA	FALSE
245	0.0101427	0.0125094	0.93007	0.862805	0.0672651	TRUE	0.74898	2 vs 1	0.13453	2 vs 1	0.86014	0.72561	Cep250:ENSMUST00000109618.1, Cep250:ENSMUST00000109619.8	Cep250	NA	NA	FALSE	FALSE	0.0125094	NA	FALSE
246	5.46448e-58	2.03081e-48	0.849679	0.783214	0.0664654	FALSE	0.447593	2 vs 1	0.132931	2 vs 1	0.699358	0.566428	Vps29:ENSMUST00000117868.7, Vps29:ENSMUST00000155671.7	Vps29	3.2955e-57	1.0972e-47	FALSE	FALSE	2.03081e-48	1.10566e-47	FALSE
247	0.542218	0.70003	0.835681	0.769231	0.06645	TRUE	0.422463	2 vs 1	0.1329	2 vs 1	0.671362	0.538462	Spink10:ENSMUST00000162365.7, Spink10:ENSMUST00000055725.11	Spink10	NA	NA	FALSE	FALSE	0.70003	NA	FALSE
248	1	NA	0.0662768	0	0.0662768	TRUE	Inf	2 vs 1	0.132554	2 vs 1	-0.867446	-1	Dok7:ENSMUST00000101298.8, Dok7:ENSMUST00000050709.3	Dok7	NA	NA	FALSE	FALSE	1	NA	FALSE
249	4.18144e-19	8.05141e-11	0.973519	0.907366	0.0661533	FALSE	1.32261	2 vs 1	0.132307	2 vs 1	0.947039	0.814732	Ntpcr:ENSMUST00000065135.11, Ntpcr:ENSMUST00000034313.12	Ntpcr	1.27064e-18	1.88675e-10	FALSE	FALSE	8.05141e-11	1.93629e-10	FALSE
250	0.051306	0.0612884	0.920502	0.854545	0.0659566	TRUE	0.678483	2 vs 1	0.131913	2 vs 1	0.841004	0.709091	Skap1:ENSMUST00000100519.10, Skap1:ENSMUST00000103154.10	Skap1	NA	NA	FALSE	FALSE	0.0612884	NA	FALSE
251	0.0386869	0.50043	0.654698	0.589404	0.0652943	TRUE	0.278254	2 vs 1	0.130589	2 vs 1	0.309396	0.178808	Ppp6r2:ENSMUST00000226221.1, Ppp6r2:ENSMUST00000238818.1	Ppp6r2	NA	NA	FALSE	FALSE	0.50043	NA	FALSE
252	0.000310664	0.000954896	0.166767	0.101664	0.0651034	TRUE	0.57016	2 vs 1	0.130207	2 vs 1	-0.666466	-0.796673	Gpr137c:ENSMUST00000227086.1, Gpr137c:ENSMUST00000146150.2	Gpr137c	NA	NA	FALSE	FALSE	0.000954896	NA	FALSE
253	0.27406	NA	0.793651	0.729167	0.0644841	TRUE	0.356675	2 vs 1	0.128968	2 vs 1	0.587302	0.458333	Acot6:ENSMUST00000222921.1, Acot6:ENSMUST00000056822.3	Acot6	NA	NA	FALSE	FALSE	0.27406	NA	FALSE
254	0.00117349	0.00288172	0.896673	0.833119	0.0635531	TRUE	0.552889	1 vs 2	0.127106	1 vs 2	0.793345	0.666239	Mmab:ENSMUST00000031560.13, Mmab:ENSMUST00000123256.2	Mmab	NA	NA	FALSE	FALSE	0.00288172	NA	FALSE
255	0.106867	0.116967	0.5	0.436823	0.0631769	TRUE	0.254065	1 vs 2	0.126354	1 vs 2	0	-0.126354	Rab43:ENSMUST00000032134.8, Rab43:ENSMUST00000032135.5	Rab43	NA	NA	FALSE	FALSE	0.116967	NA	FALSE
256	5.05489e-05	0.00104457	0.783543	0.720615	0.0629279	FALSE	0.338919	2 vs 1	0.125856	2 vs 1	0.567086	0.44123	Rai1:ENSMUST00000090806.4, Rai1:ENSMUST00000102688.1	Rai1	9.30289e-05	0.00163846	FALSE	FALSE	0.00104457	0.00170613	FALSE
257	0.00190594	NA	0.955317	0.893082	0.0622355	TRUE	0.939842	1 vs 2	0.124471	1 vs 2	0.910634	0.786164	Mical3:ENSMUST00000207889.1, Mical3:ENSMUST00000077159.7	Mical3	NA	NA	FALSE	FALSE	0.00190594	NA	FALSE
258	0.316847	NA	0.96	0.897959	0.0620408	TRUE	1.0033	1 vs 2	0.124082	1 vs 2	0.92	0.795918	Cfap69:ENSMUST00000054865.12, Cfap69:ENSMUST00000135252.2	Cfap69	NA	NA	FALSE	FALSE	0.316847	NA	FALSE
259	0.00507981	0.000125332	0.422513	0.391591	0.030922	TRUE	0.320562	2 vs 1	0.123481	2 vs 1	0.0146597	-0.108821	Adamts10:ENSMUST00000234715.1, Adamts10:ENSMUST00000234497.1, Adamts10:ENSMUST00000087623.12	Adamts10	NA	NA	FALSE	FALSE	0.00507981	NA	FALSE
260	7.07274e-06	3.5954e-05	0.864693	0.80344	0.0612536	FALSE	0.446899	1 vs 2	0.122507	1 vs 2	0.729387	0.60688	Sh2b2:ENSMUST00000196397.4, Sh2b2:ENSMUST00000196447.1	Sh2b2	1.35908e-05	6.62849e-05	FALSE	FALSE	3.5954e-05	6.80868e-05	FALSE
261	3.69353e-37	8.11154e-37	0.949651	0.888454	0.0611969	FALSE	0.862068	2 vs 1	0.122394	2 vs 1	0.899302	0.776908	Hbs1l:ENSMUST00000061324.5, Hbs1l:ENSMUST00000020153.9	Hbs1l	1.70337e-36	3.71222e-36	FALSE	FALSE	8.11154e-37	3.83099e-36	FALSE
262	2.9495e-14	5.95112e-16	0.372508	0.311353	0.0611547	FALSE	0.272328	1 vs 2	0.122309	1 vs 2	-0.254985	-0.377294	Cops7a:ENSMUST00000112439.8, Cops7a:ENSMUST00000032220.14	Cops7a	7.50782e-14	1.64183e-15	FALSE	FALSE	2.9495e-14	7.86533e-14	FALSE
263	5.62987e-10	1.09747e-10	0.864843	0.804193	0.0606507	FALSE	0.443406	2 vs 1	0.121301	2 vs 1	0.729687	0.608385	Fbxo3:ENSMUST00000111135.7, Fbxo3:ENSMUST00000111136.7	Fbxo3	1.30586e-09	2.55638e-10	FALSE	FALSE	5.62987e-10	1.3215e-09	FALSE
264	0.521151	NA	0.0606061	0	0.0606061	TRUE	Inf	1 vs 2	0.121212	1 vs 2	-0.878788	-1	Sptb:ENSMUST00000021458.12, Sptb:ENSMUST00000166101.1	Sptb	NA	NA	FALSE	FALSE	0.521151	NA	FALSE
265	0.0648045	0.310853	0.872449	0.811881	0.0605678	TRUE	0.460507	1 vs 2	0.121136	1 vs 2	0.744898	0.623762	Pm20d2:ENSMUST00000098181.8, Pm20d2:ENSMUST00000119167.1	Pm20d2	NA	NA	FALSE	FALSE	0.310853	NA	FALSE
266	0.000128982	0.000939266	0.921698	0.861893	0.0598059	TRUE	0.634552	2 vs 1	0.119612	2 vs 1	0.843397	0.723785	Clasp2:ENSMUST00000216817.1, Clasp2:ENSMUST00000111838.9	Clasp2	NA	NA	FALSE	FALSE	0.000939266	NA	FALSE
267	0.474539	NA	0.694737	0.635417	0.0593202	TRUE	0.266833	2 vs 1	0.11864	2 vs 1	0.389474	0.270833	Zkscan7:ENSMUST00000215872.1, Zkscan7:ENSMUST00000063980.7	Zkscan7	NA	NA	FALSE	FALSE	0.474539	NA	FALSE
268	0.238643	NA	0.660465	0.601399	0.0590665	TRUE	0.254072	1 vs 2	0.118133	1 vs 2	0.32093	0.202797	Zkscan2:ENSMUST00000042470.13, Zkscan2:ENSMUST00000128217.1	Zkscan2	NA	NA	FALSE	FALSE	0.238643	NA	FALSE
269	0.176791	0.111864	0.514184	0.456897	0.0572878	TRUE	0.229596	2 vs 1	0.114576	2 vs 1	0.0283688	-0.0862069	Scrn3:ENSMUST00000112050.1, Scrn3:ENSMUST00000090811.10	Scrn3	NA	NA	FALSE	FALSE	0.176791	NA	FALSE
270	0.00999807	0.0397203	0.289875	0.232831	0.0570444	TRUE	0.296405	2 vs 1	0.114089	2 vs 1	-0.42025	-0.534338	Atxn7l1:ENSMUST00000077456.12, Atxn7l1:ENSMUST00000144586.1	Atxn7l1	NA	NA	FALSE	FALSE	0.0397203	NA	FALSE
271	0.100002	NA	0.918675	0.861789	0.0568861	TRUE	0.594249	1 vs 2	0.113772	1 vs 2	0.837349	0.723577	Ksr1:ENSMUST00000018478.10, Ksr1:ENSMUST00000108264.7	Ksr1	NA	NA	FALSE	FALSE	0.100002	NA	FALSE
272	0.0214557	0.0625665	0.937089	0.880597	0.0564915	TRUE	0.702953	2 vs 1	0.112983	2 vs 1	0.874177	0.761194	Herc3:ENSMUST00000031823.11, Herc3:ENSMUST00000041401.10	Herc3	NA	NA	FALSE	FALSE	0.0625665	NA	FALSE
273	0.146737	NA	0.0978261	0.0416667	0.0561594	TRUE	0.913878	1 vs 2	0.112319	1 vs 2	-0.804348	-0.916667	Sugct:ENSMUST00000068545.5, Sugct:ENSMUST00000220514.1	Sugct	NA	NA	FALSE	FALSE	0.146737	NA	FALSE
274	0.824283	NA	0.897959	0.842105	0.0558539	TRUE	0.500775	2 vs 1	0.111708	2 vs 1	0.795918	0.684211	Gpnmb:ENSMUST00000031840.9, Gpnmb:ENSMUST00000204260.1	Gpnmb	NA	NA	FALSE	FALSE	0.824283	NA	FALSE
275	0.0115603	0.0369796	0.572	0.516913	0.0550867	TRUE	0.222337	1 vs 2	0.110173	1 vs 2	0.144	0.0338266	Atxn3:ENSMUST00000021606.11, Atxn3:ENSMUST00000161011.7	Atxn3	NA	NA	FALSE	FALSE	0.0369796	NA	FALSE
276	0.0531516	NA	0.127962	0.0730337	0.0549284	TRUE	0.621897	2 vs 1	0.109857	2 vs 1	-0.744076	-0.853933	Speg:ENSMUST00000113590.7, Speg:ENSMUST00000087122.11	Speg	NA	NA	FALSE	FALSE	0.0531516	NA	FALSE
277	0.00891714	0.00262622	0.286408	0.232038	0.0543701	TRUE	0.283946	1 vs 2	0.10874	1 vs 2	-0.427184	-0.535925	Zfp934:ENSMUST00000222429.1, Zfp934:ENSMUST00000222746.1	Zfp934	NA	NA	FALSE	FALSE	0.00891714	NA	FALSE
278	0.059779	NA	0.844985	0.791045	0.05394	TRUE	0.364561	1 vs 2	0.10788	1 vs 2	0.68997	0.58209	Arid3b:ENSMUST00000171444.7, Arid3b:ENSMUST00000098686.3	Arid3b	NA	NA	FALSE	FALSE	0.059779	NA	FALSE
279	0.00349068	0.000791511	0.699549	0.645752	0.0537978	TRUE	0.244737	2 vs 1	0.107596	2 vs 1	0.399099	0.291503	Pik3ip1:ENSMUST00000093399.10, Pik3ip1:ENSMUST00000045153.10	Pik3ip1	NA	NA	FALSE	FALSE	0.00349068	NA	FALSE
280	0.000384885	0.00458816	0.890202	0.836683	0.0535181	TRUE	0.459046	1 vs 2	0.107036	1 vs 2	0.780403	0.673367	Rbm48:ENSMUST00000042753.13, Rbm48:ENSMUST00000121877.2	Rbm48	NA	NA	FALSE	FALSE	0.00458816	NA	FALSE
281	3.90689e-09	1.04445e-09	0.121343	0.0680473	0.0532952	FALSE	0.6373	1 vs 2	0.10659	1 vs 2	-0.757315	-0.863905	Ccdc167:ENSMUST00000129091.8, Ccdc167:ENSMUST00000128751.2	Ccdc167	8.55586e-09	2.3485e-09	FALSE	FALSE	3.90689e-09	8.80172e-09	FALSE
282	1.21347e-17	5.63507e-19	0.0731707	0.0200186	0.0531521	FALSE	1.3519	2 vs 1	0.106304	2 vs 1	-0.853659	-0.959963	Clpb:ENSMUST00000001884.13, Clpb:ENSMUST00000209579.1	Clpb	3.52357e-17	1.71253e-18	FALSE	FALSE	1.21347e-17	3.71626e-17	FALSE
283	0.0968374	NA	0.937984	0.884892	0.0530924	TRUE	0.676753	1 vs 2	0.106185	1 vs 2	0.875969	0.769784	Prdm11:ENSMUST00000238863.1, Prdm11:ENSMUST00000111272.2	Prdm11	NA	NA	FALSE	FALSE	0.0968374	NA	FALSE
284	2.72341e-06	8.60445e-06	0.808331	0.755271	0.0530598	TRUE	0.753003	3 vs 1	0.10612	3 vs 1	0.616662	0.510542	Cracd:ENSMUST00000086909.4, Cracd:ENSMUST00000121851.1, Cracd:ENSMUST00000163347.7	Cracd	NA	NA	FALSE	FALSE	8.60445e-06	NA	FALSE
285	0.000920038	0.003856	0.159966	0.107399	0.0525679	TRUE	0.459116	1 vs 2	0.105136	1 vs 2	-0.680067	-0.785203	Taok2:ENSMUST00000071268.10, Taok2:ENSMUST00000117394.1	Taok2	NA	NA	FALSE	FALSE	0.003856	NA	FALSE
286	0.0462971	0.781631	0.599792	0.547541	0.0522511	TRUE	0.213859	2 vs 1	0.104502	2 vs 1	0.199584	0.095082	Xrn1:ENSMUST00000190665.1, Xrn1:ENSMUST00000185633.6	Xrn1	NA	NA	FALSE	FALSE	0.781631	NA	FALSE
287	2.6695e-09	1.84751e-08	0.616464	0.565336	0.0511282	FALSE	0.21172	1 vs 2	0.102256	1 vs 2	0.232928	0.130672	Ppil2:ENSMUST00000023455.13, Ppil2:ENSMUST00000231712.1	Ppil2	5.91212e-09	3.97061e-08	FALSE	FALSE	1.84751e-08	4.06866e-08	FALSE
288	0.00327787	0.0306866	0.356115	0.305151	0.0509645	FALSE	0.230624	1 vs 2	0.101929	1 vs 2	-0.28777	-0.389699	Tom1l2:ENSMUST00000095254.11, Tom1l2:ENSMUST00000102682.4	Tom1l2	0.00486714	0.0410209	FALSE	FALSE	0.0306866	0.0434265	FALSE
289	0.127624	0.0832764	0.42204	0.371166	0.0508742	TRUE	0.212814	2 vs 1	0.101748	2 vs 1	-0.15592	-0.257669	2210408I21Rik:ENSMUST00000225605.1, 2210408I21Rik:ENSMUST00000168779.2	2210408I21Rik	NA	NA	FALSE	FALSE	0.127624	NA	FALSE
290	0.00131139	NA	0.971545	0.920765	0.0507797	TRUE	1.07777	1 vs 2	0.101559	1 vs 2	0.943089	0.84153	Zkscan8:ENSMUST00000045228.11, Zkscan8:ENSMUST00000110481.2	Zkscan8	NA	NA	FALSE	FALSE	0.00131139	NA	FALSE
291	0.00315411	0.00241235	0.637559	0.586794	0.050765	FALSE	0.24335	1 vs 3	0.10153	1 vs 3	0.275118	0.173588	Zfp950:ENSMUST00000205854.1, Zfp950:ENSMUST00000180544.2, Zfp950:ENSMUST00000143264.7	Zfp950	0.00470119	0.00363722	FALSE	FALSE	0.00315411	0.0049064	FALSE
292	0.0139266	NA	0.993671	0.942918	0.0507533	TRUE	2.25176	2 vs 1	0.101507	2 vs 1	0.987342	0.885835	Cntrl:ENSMUST00000113033.5, Cntrl:ENSMUST00000028237.14	Cntrl	NA	NA	FALSE	FALSE	0.0139266	NA	FALSE
293	2.60858e-33	1.59447e-28	0.5874	0.596704	-0.00930398	FALSE	0.491843	3 vs 4	0.1003	3 vs 4	0.393341	0.293041	Nisch:ENSMUST00000168206.7, Nisch:ENSMUST00000172142.7, Nisch:ENSMUST00000165981.7, Nisch:ENSMUST00000171735.1	Nisch	1.08783e-32	6.08086e-28	FALSE	FALSE	1.59447e-28	6.37787e-28	FALSE
294	2.88408e-13	4.75302e-15	0.946012	0.895928	0.0500839	FALSE	0.710711	2 vs 1	0.100168	2 vs 1	0.892023	0.791855	Homer3:ENSMUST00000087467.11, Homer3:ENSMUST00000140212.7	Homer3	7.15544e-13	1.24927e-14	FALSE	FALSE	2.88408e-13	7.38928e-13	FALSE
295	0.917767	NA	0.264368	0.214286	0.0500821	TRUE	0.275894	2 vs 1	0.100164	2 vs 1	-0.471264	-0.571429	Tshz2:ENSMUST00000109157.1, Tshz2:ENSMUST00000109159.2	Tshz2	NA	NA	FALSE	FALSE	0.917767	NA	FALSE
296	0.694884	NA	0.92437	0.875	0.0493697	TRUE	0.557346	2 vs 1	0.0987395	2 vs 1	0.848739	0.75	Osbpl10:ENSMUST00000182363.7, Osbpl10:ENSMUST00000182384.7	Osbpl10	NA	NA	FALSE	FALSE	0.694884	NA	FALSE
297	0.000851191	0.000528547	0.367528	0.318308	0.0492197	FALSE	0.218721	1 vs 2	0.0984393	1 vs 2	-0.264944	-0.363383	Gm14325:ENSMUST00000188914.6, Gm14325:ENSMUST00000150650.1	Gm14325	0.00133467	0.000849607	FALSE	FALSE	0.000851191	0.00140788	FALSE
298	0.0160823	NA	0.669591	0.627586	0.0420044	TRUE	1.18662	1 vs 3	0.0972373	2 vs 3	0.573099	0.475862	Fsip1:ENSMUST00000231133.1, Fsip1:ENSMUST00000028821.9, Fsip1:ENSMUST00000028820.6	Fsip1	NA	NA	FALSE	FALSE	0.0160823	NA	FALSE
299	0.00535959	0.00700251	0.96063	0.912162	0.0484678	TRUE	0.854258	2 vs 1	0.0969355	2 vs 1	0.92126	0.824324	Bcl2l11:ENSMUST00000089634.11, Bcl2l11:ENSMUST00000110341.8	Bcl2l11	NA	NA	FALSE	FALSE	0.00700251	NA	FALSE
300	0.000418859	0.000379224	0.648474	0.6001	0.0483741	FALSE	0.206457	2 vs 1	0.0967482	2 vs 1	0.296948	0.2002	Nosip:ENSMUST00000210520.1, Nosip:ENSMUST00000003513.10	Nosip	0.000689885	0.000622439	FALSE	FALSE	0.000418859	0.000720144	FALSE
301	0.000138239	0.00227913	0.959244	0.91198	0.0472635	TRUE	0.820482	1 vs 2	0.094527	1 vs 2	0.918488	0.823961	Arhgap39:ENSMUST00000036176.15, Arhgap39:ENSMUST00000176219.8	Arhgap39	NA	NA	FALSE	FALSE	0.00227913	NA	FALSE
302	3.8332e-06	5.55277e-05	0.829359	0.782278	0.0470807	FALSE	0.302098	2 vs 1	0.0941614	2 vs 1	0.658718	0.564557	Sirt5:ENSMUST00000221515.1, Sirt5:ENSMUST00000223194.1	Sirt5	7.43869e-06	0.000100001	FALSE	FALSE	5.55277e-05	0.000104148	FALSE
303	1.16067e-15	1.4078e-14	0.191126	0.144456	0.0466701	FALSE	0.336052	2 vs 1	0.0933401	2 vs 1	-0.617747	-0.711088	Pnkd:ENSMUST00000113805.7, Pnkd:ENSMUST00000087226.10	Pnkd	3.09513e-15	3.65089e-14	FALSE	FALSE	1.4078e-14	3.83234e-14	FALSE
304	0.000867816	0.00844727	0.557983	0.511628	0.0463553	TRUE	1.3652	3 vs 1	0.0927106	3 vs 1	0.115966	0.0232558	Mbp:ENSMUST00000114676.7, Mbp:ENSMUST00000091789.10, Mbp:ENSMUST00000047865.13	Mbp	NA	NA	FALSE	FALSE	0.00844727	NA	FALSE
305	5.94182e-17	6.02989e-17	0.0852516	0.0390933	0.0461583	FALSE	0.828884	1 vs 2	0.0923166	1 vs 2	-0.829497	-0.921813	Aktip:ENSMUST00000120426.8, Aktip:ENSMUST00000120213.8	Aktip	1.65191e-16	1.75047e-16	FALSE	FALSE	6.02989e-17	1.79069e-16	FALSE
306	0.0377962	NA	0.969325	0.923529	0.0457957	TRUE	0.961861	1 vs 2	0.0915915	1 vs 2	0.93865	0.847059	Arhgap42:ENSMUST00000093893.11, Arhgap42:ENSMUST00000183182.1	Arhgap42	NA	NA	FALSE	FALSE	0.0377962	NA	FALSE
307	7.67055e-05	0.00128507	0.897225	0.851596	0.0456293	FALSE	0.419594	2 vs 1	0.0912586	2 vs 1	0.794451	0.703192	Zmym2:ENSMUST00000223669.1, Zmym2:ENSMUST00000022511.9	Zmym2	0.000137875	0.00199161	FALSE	FALSE	0.00128507	0.00207304	FALSE
308	0.212308	NA	0.878947	0.833333	0.045614	TRUE	0.373062	1 vs 2	0.0912281	1 vs 2	0.757895	0.666667	Tyk2:ENSMUST00000001036.10, Tyk2:ENSMUST00000214864.1	Tyk2	NA	NA	FALSE	FALSE	0.212308	NA	FALSE
309	1	NA	1	0.954545	0.0454545	TRUE	Inf	1 vs 2	0.0909091	1 vs 2	1	0.909091	Cfap77:ENSMUST00000189711.6, Cfap77:ENSMUST00000157048.3	Cfap77	NA	NA	FALSE	FALSE	1	NA	FALSE
310	0.0108984	0.0625037	0.573141	0.527754	0.0453874	FALSE	0.18355	2 vs 1	0.0907749	2 vs 1	0.146283	0.0555081	Zfp207:ENSMUST00000108216.7, Zfp207:ENSMUST00000188489.6	Zfp207	0.0154674	0.0813175	FALSE	FALSE	0.0625037	0.0853709	FALSE
311	0.000490591	0.000176826	0.790409	0.746853	0.0435567	FALSE	0.245499	2 vs 1	0.0871135	2 vs 1	0.580819	0.493705	Pus3:ENSMUST00000121246.1, Pus3:ENSMUST00000034615.9	Pus3	0.000801299	0.000303019	FALSE	FALSE	0.000490591	0.000835799	FALSE
312	0.484605	NA	0.0705596	0.027027	0.0435326	TRUE	1.00539	2 vs 1	0.0870652	2 vs 1	-0.858881	-0.945946	Kctd16:ENSMUST00000096572.1, Kctd16:ENSMUST00000236889.1	Kctd16	NA	NA	FALSE	FALSE	0.484605	NA	FALSE
313	0.440192	NA	0.776753	0.733333	0.0434194	TRUE	0.235241	2 vs 1	0.0868389	2 vs 1	0.553506	0.466667	Zc3h6:ENSMUST00000110319.2, Zc3h6:ENSMUST00000110320.8	Zc3h6	NA	NA	FALSE	FALSE	0.440192	NA	FALSE
314	0.00641102	0.00525045	0.945165	0.902375	0.0427898	TRUE	0.623128	1 vs 2	0.0855797	1 vs 2	0.890329	0.804749	Pnpo:ENSMUST00000018803.11, Pnpo:ENSMUST00000107629.1	Pnpo	NA	NA	FALSE	FALSE	0.00641102	NA	FALSE
315	0.000405079	NA	0.670794	0.638298	0.032496	TRUE	1.84328	1 vs 2	0.0854008	1 vs 2	0.659869	0.574468	Pid1:ENSMUST00000168574.8, Pid1:ENSMUST00000176720.1, Pid1:ENSMUST00000177458.1	Pid1	NA	NA	FALSE	FALSE	0.000405079	NA	FALSE
316	0.0526124	NA	0.920471	0.878136	0.0423351	TRUE	0.47387	2 vs 1	0.0846702	2 vs 1	0.840943	0.756272	Eif2ak3:ENSMUST00000162950.1, Eif2ak3:ENSMUST00000034093.14	Eif2ak3	NA	NA	FALSE	FALSE	0.0526124	NA	FALSE
317	0.484138	NA	0.0416667	0	0.0416667	TRUE	Inf	2 vs 1	0.0833333	2 vs 1	-0.916667	-1	Milr1:ENSMUST00000106794.8, Milr1:ENSMUST00000147326.8	Milr1	NA	NA	FALSE	FALSE	0.484138	NA	FALSE
318	0.0764403	0.173464	0.904286	0.862816	0.0414698	TRUE	0.4069	2 vs 1	0.0829397	2 vs 1	0.808571	0.725632	Pkd1:ENSMUST00000228550.1, Pkd1:ENSMUST00000035565.4	Pkd1	NA	NA	FALSE	FALSE	0.173464	NA	FALSE
319	0.000192406	0.00172866	0.985163	0.94403	0.0411334	TRUE	1.37036	1 vs 2	0.0822667	1 vs 2	0.970326	0.88806	Coro7:ENSMUST00000038552.12, Coro7:ENSMUST00000090480.5	Coro7	NA	NA	FALSE	FALSE	0.00172866	NA	FALSE
320	1.07293e-07	8.64374e-07	0.880435	0.839547	0.0408875	FALSE	0.34169	2 vs 1	0.081775	2 vs 1	0.76087	0.679095	Iah1:ENSMUST00000223345.1, Iah1:ENSMUST00000076813.7	Iah1	2.23718e-07	1.70681e-06	FALSE	FALSE	8.64374e-07	1.76476e-06	FALSE
321	0.044082	0.109876	0.858108	0.817308	0.0408004	TRUE	0.301452	2 vs 1	0.0816008	2 vs 1	0.716216	0.634615	Nup155:ENSMUST00000230017.1, Nup155:ENSMUST00000163765.2	Nup155	NA	NA	FALSE	FALSE	0.109876	NA	FALSE
322	1.09096e-05	4.08051e-05	0.94674	0.906149	0.040591	FALSE	0.610342	1 vs 2	0.0811819	1 vs 2	0.89348	0.812298	Uros:ENSMUST00000106146.7, Uros:ENSMUST00000106144.7	Uros	2.06598e-05	7.4522e-05	FALSE	FALSE	4.08051e-05	7.69019e-05	FALSE
323	0.00441707	0.0221785	0.12572	0.085567	0.0401528	TRUE	0.429659	1 vs 2	0.0803055	1 vs 2	-0.74856	-0.828866	Recql:ENSMUST00000100832.9, Recql:ENSMUST00000111803.8	Recql	NA	NA	FALSE	FALSE	0.0221785	NA	FALSE
324	1	NA	1	0.96	0.04	TRUE	Inf	1 vs 2	0.08	1 vs 2	1	0.92	Ankfn1:ENSMUST00000050983.1, Ankfn1:ENSMUST00000128717.8	Ankfn1	NA	NA	FALSE	FALSE	1	NA	FALSE
325	0.851631	NA	0.84	0.8	0.04	TRUE	0.271934	2 vs 1	0.08	2 vs 1	0.68	0.6	Ttll9:ENSMUST00000103155.9, Ttll9:ENSMUST00000099197.8	Ttll9	NA	NA	FALSE	FALSE	0.851631	NA	FALSE
326	0.125653	NA	0.107692	0.0681818	0.0395105	TRUE	0.500427	2 vs 1	0.079021	2 vs 1	-0.784615	-0.863636	Zfp229:ENSMUST00000182603.1, Zfp229:ENSMUST00000183192.7	Zfp229	NA	NA	FALSE	FALSE	0.125653	NA	FALSE
327	0.095127	0.000166113	0.466865	0.427481	0.039384	TRUE	0.159402	1 vs 2	0.078768	1 vs 2	-0.0662702	-0.145038	4930402H24Rik:ENSMUST00000044766.14, 4930402H24Rik:ENSMUST00000110243.7	4930402H24Rik	NA	NA	FALSE	FALSE	0.095127	NA	FALSE
328	1.18049e-11	1.34759e-10	0.734556	0.719902	0.0146531	FALSE	0.310988	1 vs 2	0.0787434	1 vs 2	0.513865	0.435122	Cryzl1:ENSMUST00000073466.12, Cryzl1:ENSMUST00000124282.7, Cryzl1:ENSMUST00000114023.2	Cryzl1	2.80456e-11	3.1203e-10	FALSE	FALSE	1.34759e-10	3.22106e-10	FALSE
329	0.478457	0.743275	0.669377	0.631206	0.038171	TRUE	0.167975	2 vs 1	0.076342	2 vs 1	0.338753	0.262411	Lrrc27:ENSMUST00000106104.7, Lrrc27:ENSMUST00000016124.14	Lrrc27	NA	NA	FALSE	FALSE	0.743275	NA	FALSE
330	0.0238132	0.0480138	0.544562	0.50692	0.0376412	TRUE	1.54927	2 vs 1	0.0752823	3 vs 1	0.0891231	0.0138408	Senp7:ENSMUST00000049128.10, Senp7:ENSMUST00000202000.1, Senp7:ENSMUST00000089362.8	Senp7	NA	NA	FALSE	FALSE	0.0480138	NA	FALSE
331	0.00459672	0.00874634	0.962393	0.925134	0.0372595	TRUE	0.728003	1 vs 2	0.0745189	1 vs 2	0.924786	0.850267	Pitpnm2:ENSMUST00000086123.10, Pitpnm2:ENSMUST00000159677.7	Pitpnm2	NA	NA	FALSE	FALSE	0.00874634	NA	FALSE
332	0.000272181	NA	0.0453421	0.00819672	0.0371454	TRUE	1.74867	2 vs 1	0.0742908	2 vs 1	-0.909316	-0.983607	Esyt2:ENSMUST00000100986.3, Esyt2:ENSMUST00000220816.1	Esyt2	NA	NA	FALSE	FALSE	0.000272181	NA	FALSE
333	2.329e-06	4.85222e-06	0.52016	0.501087	0.0190728	FALSE	0.697748	1 vs 2	0.0739904	1 vs 2	-0.807531	-0.881522	Zfp64:ENSMUST00000109162.8, Zfp64:ENSMUST00000087971.10, Zfp64:ENSMUST00000109161.2	Zfp64	4.61095e-06	9.39062e-06	FALSE	FALSE	4.85222e-06	9.60642e-06	FALSE
334	0.000735508	0.0008973	0.917636	0.880645	0.0369905	FALSE	0.412094	1 vs 2	0.073981	1 vs 2	0.835271	0.76129	Zmynd8:ENSMUST00000088113.10, Zmynd8:ENSMUST00000109262.7	Zmynd8	0.00117203	0.00141316	FALSE	FALSE	0.0008973	0.00147172	FALSE
335	0.17961	NA	0.123077	0.0865562	0.0365208	TRUE	0.392819	1 vs 2	0.0730415	1 vs 2	-0.753846	-0.826888	Cenpo:ENSMUST00000111169.9, Cenpo:ENSMUST00000140975.7	Cenpo	NA	NA	FALSE	FALSE	0.17961	NA	FALSE
336	2.50661e-17	5.34384e-17	0.10735	0.0711073	0.0362431	FALSE	0.451708	2 vs 1	0.0724862	2 vs 1	-0.785299	-0.857785	Pbdc1:ENSMUST00000033577.10, Pbdc1:ENSMUST00000119477.1	Pbdc1	7.1722e-17	1.56297e-16	FALSE	FALSE	5.34384e-17	1.59907e-16	FALSE
337	1.51604e-56	5.24893e-55	0.738707	0.702979	0.0357279	FALSE	0.177734	2 vs 1	0.0714558	2 vs 1	0.477414	0.405959	Rbx1:ENSMUST00000230219.1, Rbx1:ENSMUST00000023036.6	Rbx1	8.48981e-56	3.24101e-54	FALSE	FALSE	5.24893e-55	3.37308e-54	FALSE
338	0.311802	0.174239	0.406812	0.371094	0.0357186	TRUE	0.150369	1 vs 2	0.0714372	1 vs 2	-0.186375	-0.257812	St8sia4:ENSMUST00000043336.10, St8sia4:ENSMUST00000189556.1	St8sia4	NA	NA	FALSE	FALSE	0.311802	NA	FALSE
339	0.00629362	0.0106547	0.801354	0.766204	0.0351502	FALSE	0.20778	1 vs 2	0.0703004	1 vs 2	0.602708	0.532407	Vps53:ENSMUST00000056601.10, Vps53:ENSMUST00000129256.1	Vps53	0.00917137	0.0148555	FALSE	FALSE	0.0106547	0.0158206	FALSE
340	0.0229343	0.0694009	0.702588	0.667563	0.0350253	TRUE	0.16247	1 vs 2	0.0700506	1 vs 2	0.405177	0.335126	Gatad1:ENSMUST00000007559.14, Gatad1:ENSMUST00000119783.1	Gatad1	NA	NA	FALSE	FALSE	0.0694009	NA	FALSE
341	0.096438	NA	0.898121	0.863454	0.0346669	TRUE	0.332238	1 vs 2	0.0693337	1 vs 2	0.796241	0.726908	Ctnna2:ENSMUST00000161846.7, Ctnna2:ENSMUST00000162273.1	Ctnna2	NA	NA	FALSE	FALSE	0.096438	NA	FALSE
342	1.06254e-06	8.9295e-09	0.386452	0.352058	0.0343946	FALSE	0.147757	2 vs 1	0.0687892	2 vs 1	-0.227095	-0.295885	Luc7l2:ENSMUST00000161538.7, Luc7l2:ENSMUST00000057692.10	Luc7l2	2.1143e-06	1.94055e-08	FALSE	FALSE	1.06254e-06	2.15811e-06	FALSE
343	0.00763695	0.0206396	0.510185	0.504103	0.00608262	TRUE	0.570414	2 vs 1	0.0680912	2 vs 1	0.862963	0.794872	Zfp961:ENSMUST00000136516.8, Zfp961:ENSMUST00000131237.7, Zfp961:ENSMUST00000132848.1	Zfp961	NA	NA	FALSE	FALSE	0.0206396	NA	FALSE
344	0.292024	0.505662	0.571138	0.537288	0.0338501	TRUE	0.137067	2 vs 1	0.0677002	2 vs 1	0.142276	0.0745763	Mcph1:ENSMUST00000146819.7, Mcph1:ENSMUST00000039412.14	Mcph1	NA	NA	FALSE	FALSE	0.505662	NA	FALSE
345	0.0029048	0.0332821	0.225174	0.191339	0.033835	FALSE	0.205568	2 vs 1	0.06767	2 vs 1	-0.549652	-0.617322	Ppp2r5c:ENSMUST00000221715.1, Ppp2r5c:ENSMUST00000221074.1	Ppp2r5c	0.00436277	0.0440365	FALSE	FALSE	0.0332821	0.0467619	FALSE
346	0.439481	0.452569	0.636473	0.63151	0.00496301	TRUE	0.453755	3 vs 4	0.0672554	3 vs 4	-0.13587	-0.203125	Fkbp15:ENSMUST00000084527.9, Fkbp15:ENSMUST00000084528.9, Fkbp15:ENSMUST00000098033.9, Fkbp15:ENSMUST00000107461.1	Fkbp15	NA	NA	FALSE	FALSE	0.452569	NA	FALSE
347	0.000333603	0.000675409	0.113287	0.0796915	0.0335952	FALSE	0.388946	2 vs 1	0.0671904	2 vs 1	-0.773427	-0.840617	Gm14419:ENSMUST00000108975.8, Gm14419:ENSMUST00000126358.7	Gm14419	0.000561255	0.00108121	FALSE	FALSE	0.000675409	0.00113631	FALSE
348	0.890343	0.464939	0.4	0.366667	0.0333333	TRUE	0.141079	1 vs 2	0.0666667	1 vs 2	-0.2	-0.266667	Marveld3:ENSMUST00000001722.13, Marveld3:ENSMUST00000051430.6	Marveld3	NA	NA	FALSE	FALSE	0.890343	NA	FALSE
349	1	NA	0.7	0.666667	0.0333333	TRUE	0.154151	1 vs 2	0.0666667	1 vs 2	0.4	0.333333	Hecw2:ENSMUST00000120904.7, Hecw2:ENSMUST00000097741.2	Hecw2	NA	NA	FALSE	FALSE	1	NA	FALSE
350	0.129744	0.142721	0.104235	0.0714286	0.032806	TRUE	0.413914	1 vs 2	0.0656119	1 vs 2	-0.791531	-0.857143	Grk3:ENSMUST00000065167.8, Grk3:ENSMUST00000197776.1	Grk3	NA	NA	FALSE	FALSE	0.142721	NA	FALSE
351	3.79858e-07	1.4587e-06	0.897133	0.864383	0.0327496	FALSE	0.313582	2 vs 1	0.0654992	2 vs 1	0.794266	0.728767	Slc35b2:ENSMUST00000226086.1, Slc35b2:ENSMUST00000223987.1	Slc35b2	7.63612e-07	2.83716e-06	FALSE	FALSE	1.4587e-06	2.91739e-06	FALSE
352	0.973004	NA	0.954545	0.921875	0.0326705	TRUE	0.576423	2 vs 1	0.0653409	2 vs 1	0.909091	0.84375	Casz1:ENSMUST00000094464.9, Casz1:ENSMUST00000122222.7	Casz1	NA	NA	FALSE	FALSE	0.973004	NA	FALSE
353	0.216771	0.297453	0.681265	0.648649	0.0326166	TRUE	0.146488	1 vs 2	0.0652331	1 vs 2	0.36253	0.297297	Ccdc88c:ENSMUST00000068411.4, Ccdc88c:ENSMUST00000223097.1	Ccdc88c	NA	NA	FALSE	FALSE	0.297453	NA	FALSE
354	7.70272e-05	0.000399916	0.888937	0.857035	0.0319019	FALSE	0.289049	2 vs 1	0.0638038	2 vs 1	0.777874	0.71407	Ints10:ENSMUST00000110241.7, Ints10:ENSMUST00000034328.12	Ints10	0.000137875	0.000653644	FALSE	FALSE	0.000399916	0.000699852	FALSE
355	9.03495e-05	0.00175442	0.937092	0.90532	0.0317718	FALSE	0.443318	1 vs 2	0.0635437	1 vs 2	0.874183	0.810639	Kcmf1:ENSMUST00000068697.10, Kcmf1:ENSMUST00000206378.1	Kcmf1	0.000160986	0.00266589	FALSE	FALSE	0.00175442	0.00277311	FALSE
356	0.332418	NA	1	0.968442	0.0315582	TRUE	Inf	2 vs 1	0.0631164	2 vs 1	1	0.936884	Zgrf1:ENSMUST00000195955.1, Zgrf1:ENSMUST00000196141.4	Zgrf1	NA	NA	FALSE	FALSE	0.332418	NA	FALSE
357	1.05928e-05	9.64209e-05	0.931292	0.899764	0.0315274	FALSE	0.412093	2 vs 1	0.0630547	2 vs 1	0.862583	0.799528	Ap2b1:ENSMUST00000176430.7, Ap2b1:ENSMUST00000018875.12	Ap2b1	2.01572e-05	0.000169718	FALSE	FALSE	9.64209e-05	0.000177451	FALSE
358	6.15982e-12	2.05781e-09	0.771819	0.741303	0.0305163	FALSE	0.165861	1 vs 2	0.0610327	1 vs 2	0.543639	0.482606	Pfdn6:ENSMUST00000025163.13, Pfdn6:ENSMUST00000173678.2	Pfdn6	1.47235e-11	4.57421e-09	FALSE	FALSE	2.05781e-09	4.71731e-09	FALSE
359	0.859626	0.933002	0.71875	0.688349	0.0304009	TRUE	0.145857	1 vs 2	0.0608018	1 vs 2	0.4375	0.376698	Prrx1:ENSMUST00000075805.12, Prrx1:ENSMUST00000174397.2	Prrx1	NA	NA	FALSE	FALSE	0.933002	NA	FALSE
360	2.98592e-15	7.96241e-17	0.958068	0.927773	0.0302943	FALSE	0.575882	2 vs 1	0.0605885	2 vs 1	0.916135	0.855547	Seh1l:ENSMUST00000237700.1, Seh1l:ENSMUST00000025421.8	Seh1l	7.8032e-15	2.29435e-16	FALSE	FALSE	2.98592e-15	8.24282e-15	FALSE
361	7.04693e-08	1.2249e-08	0.965405	0.935377	0.0300284	FALSE	0.656467	2 vs 1	0.0600568	2 vs 1	0.93081	0.870753	Mvk:ENSMUST00000137167.7, Mvk:ENSMUST00000043760.14	Mvk	1.48516e-07	2.64715e-08	FALSE	FALSE	7.04693e-08	1.53466e-07	FALSE
362	0.0012629	0.0037189	0.918534	0.888518	0.0300156	FALSE	0.346896	2 vs 1	0.0600312	2 vs 1	0.837067	0.777036	Hira:ENSMUST00000120532.8, Hira:ENSMUST00000004222.13	Hira	0.00193382	0.00543854	FALSE	FALSE	0.0037189	0.0057394	FALSE
363	0.000267389	0.00281294	0.921044	0.891314	0.0297298	FALSE	0.352382	1 vs 2	0.0594596	1 vs 2	0.842089	0.782629	Zfp131:ENSMUST00000177916.7, Zfp131:ENSMUST00000224946.1	Zfp131	0.00045375	0.0042086	FALSE	FALSE	0.00281294	0.00442509	FALSE
364	0.0149158	0.0155098	0.0615942	0.0318792	0.029715	TRUE	0.689789	2 vs 1	0.05943	2 vs 1	-0.876812	-0.936242	Gfm2:ENSMUST00000161639.7, Gfm2:ENSMUST00000161825.7	Gfm2	NA	NA	FALSE	FALSE	0.0155098	NA	FALSE
365	7.13653e-10	6.55529e-10	0.91354	0.884278	0.0292615	FALSE	0.32406	1 vs 2	0.0585231	1 vs 2	0.82708	0.768557	Ufm1:ENSMUST00000146598.7, Ufm1:ENSMUST00000122330.1	Ufm1	1.6456e-09	1.49123e-09	FALSE	FALSE	7.13653e-10	1.66519e-09	FALSE
366	0.0624043	0.171499	0.866904	0.838213	0.0286915	FALSE	0.22887	1 vs 2	0.057383	1 vs 2	0.733808	0.676425	Lcorl:ENSMUST00000238522.1, Lcorl:ENSMUST00000087164.9	Lcorl	0.0807343	0.200943	FALSE	FALSE	0.171499	0.214101	FALSE
367	6.91032e-20	2.21224e-20	0.955399	0.927432	0.0279666	FALSE	0.51647	1 vs 2	0.0559332	1 vs 2	0.910798	0.854864	Gnai2:ENSMUST00000055704.11, Gnai2:ENSMUST00000192615.5	Gnai2	2.16708e-19	7.05378e-20	FALSE	FALSE	6.91032e-20	2.25737e-19	FALSE
368	0.112537	0.285067	0.325472	0.307783	0.0176887	TRUE	0.587787	1 vs 2	0.055593	1 vs 2	-0.432615	-0.488208	Gm14391:ENSMUST00000099028.9, Gm14391:ENSMUST00000165892.7, Gm14391:ENSMUST00000109055.1	Gm14391	NA	NA	FALSE	FALSE	0.285067	NA	FALSE
369	0.936715	NA	0.879433	0.851852	0.0275808	TRUE	0.237868	2 vs 1	0.0551615	2 vs 1	0.758865	0.703704	Megf11:ENSMUST00000093829.8, Megf11:ENSMUST00000068967.10	Megf11	NA	NA	FALSE	FALSE	0.936715	NA	FALSE
370	0.000341525	0.00141223	0.956648	0.929385	0.0272635	FALSE	0.516814	1 vs 2	0.054527	1 vs 2	0.913297	0.85877	Eps15l1:ENSMUST00000163643.2, Eps15l1:ENSMUST00000212590.1	Eps15l1	0.000572128	0.00216283	FALSE	FALSE	0.00141223	0.00225039	FALSE
371	0.0678534	0.117385	0.467874	0.446695	0.0211791	TRUE	0.772041	1 vs 3	0.053866	2 vs 3	0.789474	0.735608	Atf7:ENSMUST00000184906.7, Atf7:ENSMUST00000184616.7, Atf7:ENSMUST00000108828.8	Atf7	NA	NA	FALSE	FALSE	0.117385	NA	FALSE
372	0.0396251	0.0567604	0.0756501	0.0488215	0.0268286	TRUE	0.466558	2 vs 1	0.0536571	2 vs 1	-0.8487	-0.902357	Rgs12:ENSMUST00000114280.7, Rgs12:ENSMUST00000087684.10	Rgs12	NA	NA	FALSE	FALSE	0.0567604	NA	FALSE
373	0.0070629	0.00885689	0.847675	0.832955	0.0147207	TRUE	0.720482	2 vs 1	0.0535739	2 vs 1	-0.055517	-0.109091	Ap5m1:ENSMUST00000228238.1, Ap5m1:ENSMUST00000227431.1, Ap5m1:ENSMUST00000037473.5	Ap5m1	NA	NA	FALSE	FALSE	0.00885689	NA	FALSE
374	0.0170305	0.0411779	0.966222	0.939509	0.0267137	TRUE	0.610737	1 vs 2	0.0534274	1 vs 2	0.932444	0.879017	Cpped1:ENSMUST00000096272.10, Cpped1:ENSMUST00000073371.6	Cpped1	NA	NA	FALSE	FALSE	0.0411779	NA	FALSE
375	0.0894435	0.122115	0.345169	0.323661	0.0215086	TRUE	0.890394	3 vs 1	0.053365	2 vs 1	0.321222	0.267857	B230307C23Rik:ENSMUST00000231913.1, B230307C23Rik:ENSMUST00000232387.1, B230307C23Rik:ENSMUST00000231936.1	B230307C23Rik	NA	NA	FALSE	FALSE	0.122115	NA	FALSE
376	1.98172e-12	8.29644e-10	0.94398	0.917442	0.0265378	FALSE	0.416304	2 vs 1	0.0530755	2 vs 1	0.88796	0.834884	Bcl7a:ENSMUST00000117971.1, Bcl7a:ENSMUST00000031391.8	Bcl7a	4.82505e-12	1.87635e-09	FALSE	FALSE	8.29644e-10	1.92438e-09	FALSE
377	0.192387	NA	0.0977011	0.0712074	0.0264937	TRUE	0.345256	2 vs 1	0.0529874	2 vs 1	-0.804598	-0.857585	Dclre1c:ENSMUST00000102988.9, Dclre1c:ENSMUST00000061852.11	Dclre1c	NA	NA	FALSE	FALSE	0.192387	NA	FALSE
378	0.0563729	0.0844409	0.903107	0.876712	0.0263948	FALSE	0.270577	1 vs 2	0.0527896	1 vs 2	0.806214	0.753425	Srgap2:ENSMUST00000097588.8, Srgap2:ENSMUST00000186543.6	Srgap2	0.0744046	0.105619	FALSE	FALSE	0.0844409	0.112206	FALSE
379	5.72109e-05	0.000183358	0.953475	0.927162	0.026313	FALSE	0.476235	2 vs 1	0.0526259	2 vs 1	0.906951	0.854325	Azi2:ENSMUST00000134433.7, Azi2:ENSMUST00000044454.11	Azi2	0.000103827	0.000312834	FALSE	FALSE	0.000183358	0.00033276	FALSE
380	0.000404188	3.92302e-05	0.926667	0.900729	0.0259381	FALSE	0.331232	1 vs 2	0.0518761	1 vs 2	0.853333	0.801457	Fbrsl1:ENSMUST00000069483.11, Fbrsl1:ENSMUST00000198415.2	Fbrsl1	0.000671364	7.19837e-05	FALSE	FALSE	0.000404188	0.000704186	FALSE
381	0.0593807	0.313858	0.954649	0.92876	0.0258886	TRUE	0.479106	1 vs 2	0.0517773	1 vs 2	0.909297	0.85752	Gpcpd1:ENSMUST00000110136.7, Gpcpd1:ENSMUST00000028822.13	Gpcpd1	NA	NA	FALSE	FALSE	0.313858	NA	FALSE
382	0.342571	NA	0.86612	0.862069	0.00405125	TRUE	0.566706	2 vs 1	0.0516064	2 vs 1	0.0300546	-0.0215517	Crppa:ENSMUST00000220519.1, Crppa:ENSMUST00000221895.1, Crppa:ENSMUST00000223205.1	Crppa	NA	NA	FALSE	FALSE	0.342571	NA	FALSE
383	0.00096023	0.00405002	0.827882	0.802441	0.0254412	FALSE	0.169071	2 vs 1	0.0508823	2 vs 1	0.655765	0.604882	Phf6:ENSMUST00000101587.9, Phf6:ENSMUST00000078944.12	Phf6	0.00148779	0.00590059	FALSE	FALSE	0.00405002	0.00622591	FALSE
384	0.00029084	0.00133248	0.620317	0.59494	0.0253765	FALSE	0.106466	2 vs 1	0.0507529	2 vs 1	0.240634	0.189881	Papola:ENSMUST00000168186.7, Papola:ENSMUST00000109901.8	Papola	0.000491419	0.00205689	FALSE	FALSE	0.00133248	0.00214071	FALSE
385	0.726737	NA	0.727273	0.702128	0.0251451	TRUE	0.123379	2 vs 1	0.0502901	2 vs 1	0.454545	0.404255	Zfp709:ENSMUST00000188374.6, Zfp709:ENSMUST00000188685.6	Zfp709	NA	NA	FALSE	FALSE	0.726737	NA	FALSE
386	0.188212	0.143378	0.769092	0.744157	0.0249346	TRUE	0.135501	1 vs 2	0.0498691	1 vs 2	0.538184	0.488315	Pxmp4:ENSMUST00000000896.10, Pxmp4:ENSMUST00000109703.2	Pxmp4	NA	NA	FALSE	FALSE	0.188212	NA	FALSE
387	0.000201242	0.000253272	0.749629	0.724991	0.0246384	FALSE	0.127282	2 vs 1	0.0492769	2 vs 1	0.499259	0.449982	Fam220a:ENSMUST00000118121.1, Fam220a:ENSMUST00000119488.1	Fam220a	0.000345994	0.000422845	FALSE	FALSE	0.000253272	0.000449243	FALSE
388	0.000505707	0.00082722	0.913213	0.888683	0.0245297	FALSE	0.276151	1 vs 2	0.0490595	1 vs 2	0.826426	0.777367	Orc4:ENSMUST00000028098.10, Orc4:ENSMUST00000090976.9	Orc4	0.000822561	0.00130808	FALSE	FALSE	0.00082722	0.00137403	FALSE
389	0.0257048	0.100269	0.158144	0.133787	0.0243574	FALSE	0.195782	2 vs 1	0.0487148	2 vs 1	-0.683711	-0.732426	Nfx1:ENSMUST00000091614.6, Nfx1:ENSMUST00000098143.10	Nfx1	0.0353554	0.123825	FALSE	FALSE	0.100269	0.132342	FALSE
390	0.00289314	0.0188495	0.936233	0.912096	0.0241364	FALSE	0.347119	1 vs 2	0.0482727	1 vs 2	0.872465	0.824192	Ptk2:ENSMUST00000226988.2, Ptk2:ENSMUST00000228180.2	Ptk2	0.00436196	0.0256379	FALSE	FALSE	0.0188495	0.0269671	FALSE
391	1	NA	0.96124	0.9375	0.0237403	TRUE	0.502793	2 vs 1	0.0474806	2 vs 1	0.922481	0.875	Fn3k:ENSMUST00000103014.3, Fn3k:ENSMUST00000026175.8	Fn3k	NA	NA	FALSE	FALSE	1	NA	FALSE
392	0.110628	0.540981	0.899275	0.875668	0.0236069	TRUE	0.237163	1 vs 2	0.0472138	1 vs 2	0.798551	0.751337	2610044O15Rik8:ENSMUST00000190157.6, 2610044O15Rik8:ENSMUST00000186619.6	2610044O15Rik8	NA	NA	FALSE	FALSE	0.540981	NA	FALSE
393	0.0584206	0.0365464	0.712606	0.689309	0.0232969	FALSE	0.111183	1 vs 2	0.0465937	1 vs 2	0.425211	0.378617	Hbp1:ENSMUST00000172314.8, Hbp1:ENSMUST00000167458.8	Hbp1	0.0763053	0.0480289	FALSE	FALSE	0.0584206	0.0805891	FALSE
394	0.0773967	0.202675	0.917165	0.893986	0.0231791	TRUE	0.272318	2 vs 1	0.0463582	2 vs 1	0.83433	0.787971	Rfx7:ENSMUST00000184015.1, Rfx7:ENSMUST00000093820.9	Rfx7	NA	NA	FALSE	FALSE	0.202675	NA	FALSE
395	6.1711e-30	5.59707e-25	0.944721	0.921701	0.0230195	FALSE	0.372802	2 vs 1	0.0460389	2 vs 1	0.889442	0.843403	Ndfip1:ENSMUST00000236052.1, Ndfip1:ENSMUST00000025293.4	Ndfip1	2.34861e-29	1.94398e-24	FALSE	FALSE	5.59707e-25	1.99459e-24	FALSE
396	0.000527052	8.85721e-05	0.127566	0.104603	0.0229635	FALSE	0.224447	1 vs 2	0.0459269	1 vs 2	-0.744868	-0.790795	Slc25a27:ENSMUST00000024705.5, Slc25a27:ENSMUST00000233442.1	Slc25a27	0.000853737	0.000156612	FALSE	FALSE	0.000527052	0.000890536	FALSE
397	0.0639437	0.194753	0.890523	0.86761	0.0229126	FALSE	0.2161	2 vs 1	0.0458251	2 vs 1	0.781046	0.735221	Phf12:ENSMUST00000108360.7, Phf12:ENSMUST00000049167.13	Phf12	0.0821834	0.226146	FALSE	FALSE	0.194753	0.241593	FALSE
398	0.0436955	0.146727	0.293059	0.270486	0.0225727	FALSE	0.111583	1 vs 2	0.0451453	1 vs 2	-0.413883	-0.459028	Wdr70:ENSMUST00000045766.7, Wdr70:ENSMUST00000227371.1	Wdr70	0.0584596	0.174015	FALSE	FALSE	0.146727	0.186139	FALSE
399	0.129302	0.206043	0.11399	0.0921053	0.0218844	TRUE	0.237575	1 vs 2	0.0437687	1 vs 2	-0.772021	-0.815789	Zscan29:ENSMUST00000079024.11, Zscan29:ENSMUST00000146243.1	Zscan29	NA	NA	FALSE	FALSE	0.206043	NA	FALSE
400	0.0175502	0.0363926	0.550502	0.528706	0.0217953	FALSE	0.0877461	1 vs 2	0.0435907	1 vs 2	0.101003	0.0574125	Tle1:ENSMUST00000074216.13, Tle1:ENSMUST00000107337.7	Tle1	0.0243099	0.0479888	FALSE	FALSE	0.0363926	0.0509496	FALSE
401	1	NA	0.178571	0.156863	0.0217087	TRUE	0.155702	1 vs 2	0.0434174	1 vs 2	-0.642857	-0.686275	Ccdc158:ENSMUST00000060930.9, Ccdc158:ENSMUST00000151180.7	Ccdc158	NA	NA	FALSE	FALSE	1	NA	FALSE
402	1.8562e-09	2.08324e-08	0.917652	0.896126	0.0215266	FALSE	0.25597	2 vs 1	0.0430533	2 vs 1	0.835305	0.792252	Ociad1:ENSMUST00000166823.4, Ociad1:ENSMUST00000071081.12	Ociad1	4.20597e-09	4.45264e-08	FALSE	FALSE	2.08324e-08	4.56218e-08	FALSE
403	0.0105064	0.00112608	0.156129	0.13471	0.0214191	FALSE	0.172624	2 vs 1	0.0428382	2 vs 1	-0.687742	-0.73058	Tdrkh:ENSMUST00000196386.4, Tdrkh:ENSMUST00000166032.7	Tdrkh	0.015031	0.00175922	FALSE	FALSE	0.0105064	0.0156597	FALSE
404	0.498649	0.772813	0.170418	0.149321	0.0210967	TRUE	0.157267	1 vs 2	0.0421935	1 vs 2	-0.659164	-0.701357	Lmna:ENSMUST00000029699.12, Lmna:ENSMUST00000120377.7	Lmna	NA	NA	FALSE	FALSE	0.772813	NA	FALSE
405	0.0506403	0.120803	0.966312	0.945299	0.0210129	TRUE	0.506725	2 vs 1	0.0420258	2 vs 1	0.932624	0.890598	Tmem175:ENSMUST00000146207.5, Tmem175:ENSMUST00000063272.12	Tmem175	NA	NA	FALSE	FALSE	0.120803	NA	FALSE
406	0.683925	0.690042	0.623656	0.603053	0.0206025	TRUE	0.0868908	1 vs 2	0.041205	1 vs 2	0.247312	0.206107	Trmt2b:ENSMUST00000087541.11, Trmt2b:ENSMUST00000087540.3	Trmt2b	NA	NA	FALSE	FALSE	0.690042	NA	FALSE
407	1	0.981671	0.461538	0.440945	0.0205936	TRUE	0.0831775	2 vs 1	0.0411872	2 vs 1	-0.0769231	-0.11811	Dgkb:ENSMUST00000221176.1, Dgkb:ENSMUST00000040500.8	Dgkb	NA	NA	FALSE	FALSE	1	NA	FALSE
408	0.46255	NA	0.515392	0.495283	0.0201092	TRUE	0.415979	1 vs 3	0.0402185	1 vs 3	0.0307845	-0.00943396	Ankrd42:ENSMUST00000056106.13, Ankrd42:ENSMUST00000118157.7, Ankrd42:ENSMUST00000138267.1	Ankrd42	NA	NA	FALSE	FALSE	0.46255	NA	FALSE
409	0.00282212	0.000129227	0.301453	0.281478	0.019975	FALSE	0.0967536	1 vs 2	0.03995	1 vs 2	-0.397093	-0.437043	Dnajc2:ENSMUST00000115193.7, Dnajc2:ENSMUST00000115192.1	Dnajc2	0.00427132	0.00022342	FALSE	FALSE	0.00282212	0.00442509	FALSE
410	0.305967	0.264094	0.830681	0.810865	0.0198159	TRUE	0.13482	1 vs 2	0.0396318	1 vs 2	0.661362	0.62173	Wnk2:ENSMUST00000162581.7, Wnk2:ENSMUST00000091623.9	Wnk2	NA	NA	FALSE	FALSE	0.305967	NA	FALSE
411	0.279811	0.0476279	0.843961	0.824268	0.0196931	TRUE	0.142465	1 vs 2	0.0393862	1 vs 2	0.687922	0.648536	Xpr1:ENSMUST00000027741.11, Xpr1:ENSMUST00000111774.1	Xpr1	NA	NA	FALSE	FALSE	0.279811	NA	FALSE
412	1	0.988297	0.548862	0.529412	0.0194504	TRUE	0.0782912	1 vs 2	0.0389007	1 vs 2	0.0977242	0.0588235	Cacna1d:ENSMUST00000112250.5, Cacna1d:ENSMUST00000238675.1	Cacna1d	NA	NA	FALSE	FALSE	1	NA	FALSE
413	1	NA	0.844444	0.825	0.0194444	TRUE	0.141079	2 vs 1	0.0388889	2 vs 1	0.688889	0.65	Pf4:ENSMUST00000202625.1, Pf4:ENSMUST00000031320.7	Pf4	NA	NA	FALSE	FALSE	1	NA	FALSE
414	0.388514	NA	0.0730117	0.0535714	0.0194403	TRUE	0.330359	2 vs 1	0.0388806	2 vs 1	-0.853977	-0.892857	Odad1:ENSMUST00000210602.1, Odad1:ENSMUST00000210039.2	Odad1	NA	NA	FALSE	FALSE	0.388514	NA	FALSE
415	8.45006e-21	6.65145e-20	0.987626	0.968312	0.0193139	FALSE	0.960066	1 vs 2	0.0386277	1 vs 2	0.975251	0.936624	Ola1:ENSMUST00000028517.12, Ola1:ENSMUST00000100015.5	Ola1	2.7151e-20	2.08662e-19	FALSE	FALSE	6.65145e-20	2.19106e-19	FALSE
416	0.353952	0.622592	0.1921	0.172816	0.019284	TRUE	0.129378	1 vs 2	0.0385681	1 vs 2	-0.615801	-0.654369	Zfp74:ENSMUST00000108212.7, Zfp74:ENSMUST00000108205.8	Zfp74	NA	NA	FALSE	FALSE	0.622592	NA	FALSE
417	0.256376	NA	0.97733	0.958159	0.019171	TRUE	0.632644	2 vs 1	0.038342	2 vs 1	0.95466	0.916318	Smcr8:ENSMUST00000102667.4, Smcr8:ENSMUST00000056907.6	Smcr8	NA	NA	FALSE	FALSE	0.256376	NA	FALSE
418	0.523898	0.494428	0.899678	0.880886	0.0187917	TRUE	0.228265	1 vs 3	0.0375834	1 vs 3	0.799356	0.761773	Zfp799:ENSMUST00000202988.3, Zfp799:ENSMUST00000201876.3, Zfp799:ENSMUST00000201499.1	Zfp799	NA	NA	FALSE	FALSE	0.523898	NA	FALSE
419	1.68713e-41	2.64752e-40	0.475022	0.456436	0.0185863	FALSE	0.0747048	1 vs 2	0.0371725	1 vs 2	-0.0499551	-0.0871276	Rpl34:ENSMUST00000062601.13, Rpl34:ENSMUST00000133802.5	Rpl34	8.26693e-41	1.30365e-39	FALSE	FALSE	2.64752e-40	1.33055e-39	FALSE
420	0.481122	NA	0.903047	0.885057	0.0179896	TRUE	0.190329	1 vs 2	0.0359792	1 vs 2	0.806094	0.770115	Apaf1:ENSMUST00000159110.7, Apaf1:ENSMUST00000161987.7	Apaf1	NA	NA	FALSE	FALSE	0.481122	NA	FALSE
421	2.6327e-05	9.79905e-06	0.0349381	0.017331	0.0176071	FALSE	0.71916	1 vs 2	0.0352142	1 vs 2	-0.930124	-0.965338	Xpa:ENSMUST00000058232.10, Xpa:ENSMUST00000030013.11	Xpa	4.86802e-05	1.86854e-05	FALSE	FALSE	2.6327e-05	5.05892e-05	FALSE
422	1	NA	0.167404	0.15	0.0174037	TRUE	0.13046	2 vs 1	0.0348073	2 vs 1	-0.665193	-0.7	Lrrtm4:ENSMUST00000136421.1, Lrrtm4:ENSMUST00000147663.7	Lrrtm4	NA	NA	FALSE	FALSE	1	NA	FALSE
423	1	NA	0.874172	0.857143	0.0170293	TRUE	0.146603	1 vs 2	0.0340587	1 vs 2	0.748344	0.714286	D630023F18Rik:ENSMUST00000148020.7, D630023F18Rik:ENSMUST00000050047.3	D630023F18Rik	NA	NA	FALSE	FALSE	1	NA	FALSE
424	0.155473	0.336205	0.932955	0.916547	0.0164078	FALSE	0.236659	2 vs 1	0.0328156	2 vs 1	0.865909	0.833094	Ppp1r9a:ENSMUST00000175962.1, Ppp1r9a:ENSMUST00000035813.8	Ppp1r9a	0.189861	0.380186	FALSE	FALSE	0.336205	0.398165	FALSE
425	0.0885827	0.195631	0.944563	0.928184	0.016379	FALSE	0.276354	2 vs 1	0.0327581	2 vs 1	0.889127	0.856369	Dst:ENSMUST00000182314.7, Dst:ENSMUST00000097785.9	Dst	0.112014	0.226489	FALSE	FALSE	0.195631	0.241916	FALSE
426	0.693893	0.535042	0.751613	0.735577	0.016036	TRUE	0.0841283	2 vs 1	0.032072	2 vs 1	0.503226	0.471154	Asb1:ENSMUST00000188081.6, Asb1:ENSMUST00000027538.8	Asb1	NA	NA	FALSE	FALSE	0.693893	NA	FALSE
427	8.57178e-09	1.97007e-09	0.962184	0.946276	0.015908	FALSE	0.367798	1 vs 2	0.031816	1 vs 2	0.924368	0.892552	Tmpo:ENSMUST00000072239.13, Tmpo:ENSMUST00000020123.6	Tmpo	1.85643e-08	4.40435e-09	FALSE	FALSE	8.57178e-09	1.90917e-08	FALSE
428	0.0109298	0.0286611	0.876827	0.861275	0.0155513	FALSE	0.136794	1 vs 2	0.0311027	1 vs 2	0.753653	0.722551	Rnaseh2a:ENSMUST00000128972.8, Rnaseh2a:ENSMUST00000065049.14	Rnaseh2a	0.0154674	0.0384967	FALSE	FALSE	0.0286611	0.040707	FALSE
429	0.831046	NA	0.398467	0.383234	0.0152339	TRUE	0.063991	2 vs 1	0.0304678	2 vs 1	-0.203065	-0.233533	Ttll3:ENSMUST00000204026.2, Ttll3:ENSMUST00000032414.10	Ttll3	NA	NA	FALSE	FALSE	0.831046	NA	FALSE
430	0.148137	0.0831256	0.181975	0.166824	0.0151507	FALSE	0.10528	1 vs 2	0.0303014	1 vs 2	-0.63605	-0.666352	Nkapd1:ENSMUST00000131351.7, Nkapd1:ENSMUST00000145139.7	Nkapd1	0.181467	0.104309	FALSE	FALSE	0.148137	0.186738	FALSE
431	0.0149083	0.00596798	0.928141	0.913146	0.0149942	FALSE	0.205799	2 vs 1	0.0299884	2 vs 1	0.856281	0.826293	Stx5a:ENSMUST00000176570.1, Stx5a:ENSMUST00000176381.7	Stx5a	0.0207973	0.0085351	FALSE	FALSE	0.0149083	0.0214068	FALSE
432	0.923558	0.972682	0.65873	0.643836	0.0148945	TRUE	0.0655894	2 vs 1	0.0297891	2 vs 1	0.31746	0.287671	Gsto2:ENSMUST00000237514.1, Gsto2:ENSMUST00000120645.7	Gsto2	NA	NA	FALSE	FALSE	0.972682	NA	FALSE
433	0.27847	0.396462	0.935661	0.920914	0.0147466	TRUE	0.22225	1 vs 2	0.0294932	1 vs 2	0.871321	0.841828	Papolg:ENSMUST00000020513.9, Papolg:ENSMUST00000102863.2	Papolg	NA	NA	FALSE	FALSE	0.396462	NA	FALSE
434	0.848345	NA	0.164638	0.15	0.0146377	TRUE	0.110483	1 vs 2	0.0292754	1 vs 2	-0.670725	-0.7	Cdh8:ENSMUST00000142129.7, Cdh8:ENSMUST00000093249.10	Cdh8	NA	NA	FALSE	FALSE	0.848345	NA	FALSE
435	0.352075	NA	0.945586	0.930958	0.0146288	TRUE	0.253698	1 vs 2	0.0292575	1 vs 2	0.891173	0.861915	Grik2:ENSMUST00000218823.1, Grik2:ENSMUST00000220263.1	Grik2	NA	NA	FALSE	FALSE	0.352075	NA	FALSE
436	0.181066	0.404755	0.91518	0.900778	0.0144019	FALSE	0.172689	2 vs 1	0.0288037	2 vs 1	0.83036	0.801556	Parp11:ENSMUST00000112193.7, Parp11:ENSMUST00000039680.6	Parp11	0.219068	0.449856	FALSE	FALSE	0.404755	0.475042	FALSE
437	0.394967	0.623595	0.719246	0.70529	0.0139567	FALSE	0.0681109	2 vs 1	0.0279135	2 vs 1	0.438493	0.410579	Zfp655:ENSMUST00000196069.4, Zfp655:ENSMUST00000199322.4	Zfp655	0.44363	0.65844	FALSE	FALSE	0.623595	0.689684	FALSE
438	1	NA	0.763941	0.75	0.0139405	TRUE	0.0757938	1 vs 2	0.027881	1 vs 2	0.527881	0.5	Plch2:ENSMUST00000176194.7, Plch2:ENSMUST00000145662.8	Plch2	NA	NA	FALSE	FALSE	1	NA	FALSE
439	0.812725	NA	0.0138889	0	0.0138889	TRUE	Inf	1 vs 2	0.0277778	1 vs 2	-0.972222	-1	Adamts20:ENSMUST00000035342.10, Adamts20:ENSMUST00000155907.1	Adamts20	NA	NA	FALSE	FALSE	0.812725	NA	FALSE
440	0.148697	NA	0.0225352	0.00867052	0.0138647	TRUE	0.969235	1 vs 2	0.0277294	1 vs 2	-0.95493	-0.982659	Tsga10:ENSMUST00000041815.14, Tsga10:ENSMUST00000123082.8	Tsga10	NA	NA	FALSE	FALSE	0.148697	NA	FALSE
441	0.511106	0.784629	0.457917	0.444354	0.0135637	TRUE	0.0547817	1 vs 2	0.0271275	1 vs 2	-0.0841655	-0.111293	Spata24:ENSMUST00000025209.11, Spata24:ENSMUST00000096573.3	Spata24	NA	NA	FALSE	FALSE	0.784629	NA	FALSE
442	0.39758	0.297591	0.887324	0.873797	0.0135272	TRUE	0.128739	1 vs 2	0.0270543	1 vs 2	0.774648	0.747594	Zfx:ENSMUST00000088102.11, Zfx:ENSMUST00000113925.7	Zfx	NA	NA	FALSE	FALSE	0.39758	NA	FALSE
443	0.329918	0.0746273	0.75535	0.741917	0.013433	FALSE	0.0713963	2 vs 1	0.026866	2 vs 1	0.510699	0.483833	Gna13:ENSMUST00000106702.3, Gna13:ENSMUST00000020930.13	Gna13	0.381498	0.0945603	FALSE	FALSE	0.329918	0.393094	FALSE
444	0.0528072	0.104899	0.94721	0.933884	0.0133254	FALSE	0.239246	2 vs 1	0.0266507	2 vs 1	0.894419	0.867769	Rnf13:ENSMUST00000199041.1, Rnf13:ENSMUST00000200497.4	Rnf13	0.0704097	0.12832	FALSE	FALSE	0.104899	0.137068	FALSE
445	0.326762	NA	0.955711	0.943038	0.012673	TRUE	0.264996	2 vs 1	0.025346	2 vs 1	0.911422	0.886076	Shprh:ENSMUST00000054814.13, Shprh:ENSMUST00000044053.12	Shprh	NA	NA	FALSE	FALSE	0.326762	NA	FALSE
446	0.280725	0.00950433	0.510436	0.498003	0.0124326	FALSE	0.0497365	2 vs 1	0.0248652	2 vs 1	0.0208713	-0.00399386	Chordc1:ENSMUST00000213605.1, Chordc1:ENSMUST00000001825.8	Chordc1	0.330463	0.0133472	FALSE	FALSE	0.280725	0.339643	FALSE
447	0.267021	NA	0.944394	0.932081	0.0123129	FALSE	0.213146	1 vs 2	0.0246258	1 vs 2	0.888788	0.864162	Mfn2:ENSMUST00000105716.8, Mfn2:ENSMUST00000105714.7	Mfn2	0.31623	NA	FALSE	FALSE	0.267021	0.324063	FALSE
448	1.43955e-05	8.00391e-05	0.490531	0.478341	0.0121902	FALSE	0.0488105	1 vs 2	0.0243804	1 vs 2	-0.0189381	-0.0433185	Ndufab1:ENSMUST00000123296.7, Ndufab1:ENSMUST00000033157.9	Ndufab1	2.67443e-05	0.00014217	FALSE	FALSE	8.00391e-05	0.000147997	FALSE
449	1	0.988257	0.45	0.437855	0.0121451	TRUE	0.0492018	2 vs 1	0.0242902	2 vs 1	-0.1	-0.12429	Raet1e:ENSMUST00000181645.7, Raet1e:ENSMUST00000178026.1	Raet1e	NA	NA	FALSE	FALSE	1	NA	FALSE
450	0.579105	NA	0.891824	0.879733	0.0120912	TRUE	0.119607	1 vs 2	0.0241823	1 vs 2	0.783648	0.759465	Cdk5rap1:ENSMUST00000109731.7, Cdk5rap1:ENSMUST00000109730.2	Cdk5rap1	NA	NA	FALSE	FALSE	0.579105	NA	FALSE
451	1	0.993774	0.261905	0.25	0.0119048	TRUE	0.0625204	1 vs 2	0.0238095	1 vs 2	-0.47619	-0.5	Spaca1:ENSMUST00000084734.10, Spaca1:ENSMUST00000029927.5	Spaca1	NA	NA	FALSE	FALSE	1	NA	FALSE
452	9.26378e-17	8.54439e-14	0.900778	0.889129	0.0116489	FALSE	0.124023	2 vs 1	0.0232978	2 vs 1	0.801556	0.778258	Emd:ENSMUST00000002029.12, Emd:ENSMUST00000088313.4	Emd	2.53944e-16	2.10365e-13	FALSE	FALSE	8.54439e-14	2.23293e-13	FALSE
453	0.499386	0.0285308	0.756859	0.745217	0.0116411	FALSE	0.0622676	2 vs 1	0.0232823	2 vs 1	0.513717	0.490435	Gm2007:ENSMUST00000177981.7, Gm2007:ENSMUST00000178133.7	Gm2007	0.55135	0.0384967	FALSE	FALSE	0.499386	0.572247	FALSE
454	0.867699	NA	0.23913	0.227778	0.0113527	TRUE	0.0634491	2 vs 1	0.0227053	2 vs 1	-0.521739	-0.544444	Ece2:ENSMUST00000003898.11, Ece2:ENSMUST00000122306.7	Ece2	NA	NA	FALSE	FALSE	0.867699	NA	FALSE
455	0.514616	0.0162063	0.75712	0.745895	0.0112253	FALSE	0.0601184	2 vs 1	0.0224505	2 vs 1	0.51424	0.491789	Gm11007:ENSMUST00000177700.7, Gm11007:ENSMUST00000178120.7	Gm11007	0.563491	0.0221202	FALSE	FALSE	0.514616	0.583034	FALSE
456	0.44956	0.373447	0.953571	0.943005	0.0105662	TRUE	0.216188	1 vs 2	0.0211325	1 vs 2	0.907143	0.88601	Gpd1l:ENSMUST00000146623.7, Gpd1l:ENSMUST00000084853.3	Gpd1l	NA	NA	FALSE	FALSE	0.44956	NA	FALSE
457	0.596964	0.852042	0.51498	0.504475	0.010505	TRUE	0.0420376	1 vs 2	0.0210101	1 vs 2	0.0299604	0.00895037	Zup1:ENSMUST00000218055.1, Zup1:ENSMUST00000048222.5	Zup1	NA	NA	FALSE	FALSE	0.852042	NA	FALSE
458	0.589879	0.738503	0.937608	0.927386	0.0102224	TRUE	0.16269	2 vs 1	0.0204449	2 vs 1	0.875217	0.854772	Foxp2:ENSMUST00000115470.2, Foxp2:ENSMUST00000115477.7	Foxp2	NA	NA	FALSE	FALSE	0.738503	NA	FALSE
459	0.0156012	0.0670731	0.839468	0.829357	0.0101112	FALSE	0.0731996	2 vs 1	0.0202225	2 vs 1	0.678936	0.658713	Csnk1a1:ENSMUST00000163205.7, Csnk1a1:ENSMUST00000165123.7	Csnk1a1	0.0216867	0.0861104	FALSE	FALSE	0.0670731	0.0906644	FALSE
460	0.0357198	0.102429	0.919436	0.909596	0.00984052	FALSE	0.126003	1 vs 2	0.019681	1 vs 2	0.838873	0.819192	Pcnp:ENSMUST00000114444.8, Pcnp:ENSMUST00000122253.1	Pcnp	0.0484503	0.126091	FALSE	FALSE	0.102429	0.134739	FALSE
461	0.420007	NA	0.965382	0.955556	0.00982691	TRUE	0.260111	1 vs 2	0.0196538	1 vs 2	0.930765	0.911111	Smarca1:ENSMUST00000088973.10, Smarca1:ENSMUST00000141084.2	Smarca1	NA	NA	FALSE	FALSE	0.420007	NA	FALSE
462	1	NA	0.851852	0.842105	0.00974659	TRUE	0.0752234	2 vs 1	0.0194932	2 vs 1	0.703704	0.684211	Cnbd2:ENSMUST00000073942.11, Cnbd2:ENSMUST00000109580.1	Cnbd2	NA	NA	FALSE	FALSE	1	NA	FALSE
463	0.200595	0.430473	0.805407	0.795751	0.00965609	FALSE	0.0604916	1 vs 2	0.0193122	1 vs 2	0.610814	0.591501	Tcaf1:ENSMUST00000045054.10, Tcaf1:ENSMUST00000045140.4	Tcaf1	0.241206	0.477077	FALSE	FALSE	0.430473	0.501847	FALSE
464	0.30107	0.568193	0.83503	0.825522	0.00950798	FALSE	0.0674865	1 vs 2	0.019016	1 vs 2	0.67006	0.651044	Nrbf2:ENSMUST00000077839.12, Nrbf2:ENSMUST00000159002.1	Nrbf2	0.352297	0.607218	FALSE	FALSE	0.568193	0.634564	FALSE
465	1.946e-09	1.63244e-34	0.867074	0.857628	0.0094461	FALSE	0.0796053	1 vs 2	0.0188922	1 vs 2	0.734147	0.715255	Npm1:ENSMUST00000075641.9, Npm1:ENSMUST00000109354.9	Npm1	4.3841e-09	7.21613e-34	FALSE	FALSE	1.946e-09	4.48725e-09	FALSE
466	2.01289e-09	2.20236e-07	0.984446	0.975063	0.00938267	FALSE	0.481588	1 vs 2	0.0187653	1 vs 2	0.968891	0.950126	Csnk1e:ENSMUST00000117786.7, Csnk1e:ENSMUST00000122044.7	Csnk1e	4.50887e-09	4.55701e-07	FALSE	FALSE	2.20236e-07	4.69199e-07	FALSE
467	0.731366	NA	0.962818	0.953608	0.00920976	TRUE	0.230908	2 vs 1	0.0184195	2 vs 1	0.925636	0.907216	Zfp667:ENSMUST00000153840.1, Zfp667:ENSMUST00000086327.11	Zfp667	NA	NA	FALSE	FALSE	0.731366	NA	FALSE
468	0.229403	NA	0.982648	0.973485	0.00916355	TRUE	0.433401	2 vs 1	0.0183271	2 vs 1	0.965297	0.94697	Ipmk:ENSMUST00000118381.7, Ipmk:ENSMUST00000079252.12	Ipmk	NA	NA	FALSE	FALSE	0.229403	NA	FALSE
469	1	NA	0.1341	0.125	0.00909962	TRUE	0.0807232	1 vs 2	0.0181992	1 vs 2	-0.731801	-0.75	Cyp2u1:ENSMUST00000106337.6, Cyp2u1:ENSMUST00000200236.1	Cyp2u1	NA	NA	FALSE	FALSE	1	NA	FALSE
470	1	NA	0.670732	0.661765	0.008967	TRUE	0.040328	2 vs 1	0.017934	2 vs 1	0.341463	0.323529	Elapor2:ENSMUST00000134991.7, Elapor2:ENSMUST00000115348.8	Elapor2	NA	NA	FALSE	FALSE	1	NA	FALSE
471	0.848659	0.796158	0.635945	0.627494	0.00845024	TRUE	0.0363229	1 vs 2	0.0169005	1 vs 2	0.271889	0.254989	Mast4:ENSMUST00000239261.1, Mast4:ENSMUST00000164111.1	Mast4	NA	NA	FALSE	FALSE	0.848659	NA	FALSE
472	0.775094	0.806377	0.305455	0.297071	0.00838342	TRUE	0.0398275	1 vs 2	0.0167668	1 vs 2	-0.389091	-0.405858	Marf1:ENSMUST00000090300.5, Marf1:ENSMUST00000229614.1	Marf1	NA	NA	FALSE	FALSE	0.806377	NA	FALSE
473	0.683686	0.859937	0.0759109	0.0675676	0.00834336	TRUE	0.125421	1 vs 2	0.0166867	1 vs 2	-0.848178	-0.864865	Zfp940:ENSMUST00000108223.7, Zfp940:ENSMUST00000085792.4	Zfp940	NA	NA	FALSE	FALSE	0.859937	NA	FALSE
474	0.694529	0.741938	0.724874	0.716599	0.00827518	TRUE	0.041116	1 vs 2	0.0165504	1 vs 2	0.449749	0.433198	Fgd4:ENSMUST00000161861.7, Fgd4:ENSMUST00000161188.8	Fgd4	NA	NA	FALSE	FALSE	0.741938	NA	FALSE
475	0.285437	NA	0.0214286	0.0135863	0.00784231	TRUE	0.463648	2 vs 1	0.0156846	2 vs 1	-0.957143	-0.972827	H2bc22:ENSMUST00000102982.1, H2bc22:ENSMUST00000110473.2	H2bc22	NA	NA	FALSE	FALSE	0.285437	NA	FALSE
476	0.683791	NA	0.901605	0.893939	0.00766599	TRUE	0.0835636	2 vs 1	0.015332	2 vs 1	0.803211	0.787879	Gfpt1:ENSMUST00000113655.7, Gfpt1:ENSMUST00000113658.7	Gfpt1	NA	NA	FALSE	FALSE	0.683791	NA	FALSE
477	0.915656	NA	0.928144	0.92069	0.00745406	TRUE	0.106764	2 vs 1	0.0149081	2 vs 1	0.856287	0.841379	Kctd9:ENSMUST00000152243.7, Kctd9:ENSMUST00000078053.12	Kctd9	NA	NA	FALSE	FALSE	0.915656	NA	FALSE
478	0.919423	0.98134	0.286385	0.27907	0.00731521	TRUE	0.0360739	2 vs 1	0.0146304	2 vs 1	-0.42723	-0.44186	Spata33:ENSMUST00000212760.1, Spata33:ENSMUST00000212523.1	Spata33	NA	NA	FALSE	FALSE	0.98134	NA	FALSE
479	0.509465	0.359262	0.959273	0.952316	0.00695711	FALSE	0.164986	1 vs 2	0.0139142	1 vs 2	0.918546	0.904632	Gm14399:ENSMUST00000109062.7, Gm14399:ENSMUST00000109059.7	Gm14399	0.559412	0.40391	FALSE	FALSE	0.509465	0.580553	FALSE
480	0.336816	0.544546	0.961603	0.95476	0.00684237	FALSE	0.171128	1 vs 2	0.0136847	1 vs 2	0.923205	0.909521	Hsd17b7:ENSMUST00000027989.12, Hsd17b7:ENSMUST00000111353.3	Hsd17b7	0.387191	0.585162	FALSE	FALSE	0.544546	0.611639	FALSE
481	0.0107388	0.0049124	0.939106	0.932328	0.00677764	FALSE	0.112776	2 vs 1	0.0135553	2 vs 1	0.878212	0.864656	Marchf5:ENSMUST00000112391.7, Marchf5:ENSMUST00000024078.14	Marchf5	0.0153077	0.0071038	FALSE	FALSE	0.0107388	0.0158854	FALSE
482	0.691287	0.572867	0.878951	0.872216	0.00673572	TRUE	0.0618446	2 vs 1	0.0134714	2 vs 1	0.757903	0.744431	Parg:ENSMUST00000163350.7, Parg:ENSMUST00000022470.14	Parg	NA	NA	FALSE	FALSE	0.691287	NA	FALSE
483	0.629234	0.370331	0.941509	0.934901	0.00660889	TRUE	0.114095	1 vs 2	0.0132178	1 vs 2	0.883019	0.869801	Glrb:ENSMUST00000029654.14, Glrb:ENSMUST00000107743.7	Glrb	NA	NA	FALSE	FALSE	0.629234	NA	FALSE
484	7.29549e-32	1.12217e-44	0.981837	0.975242	0.00659482	FALSE	0.316491	2 vs 1	0.0131896	2 vs 1	0.963674	0.950484	Fth1:ENSMUST00000237465.1, Fth1:ENSMUST00000025563.7	Fth1	3.01035e-31	5.82032e-44	FALSE	FALSE	7.29549e-32	3.04237e-31	FALSE
485	1	NA	0.117647	0.111111	0.00653595	TRUE	0.0645385	2 vs 1	0.0130719	2 vs 1	-0.764706	-0.777778	Sfmbt2:ENSMUST00000114862.7, Sfmbt2:ENSMUST00000041105.6	Sfmbt2	NA	NA	FALSE	FALSE	1	NA	FALSE
486	0.743447	0.775201	0.833166	0.826653	0.00651252	TRUE	0.0461406	2 vs 1	0.013025	2 vs 1	0.666332	0.653307	Zfp930:ENSMUST00000212312.1, Zfp930:ENSMUST00000212681.1	Zfp930	NA	NA	FALSE	FALSE	0.775201	NA	FALSE
487	0.719356	0.861596	0.870673	0.864198	0.00647523	TRUE	0.0563203	1 vs 2	0.0129505	1 vs 2	0.741346	0.728395	Tmem87a:ENSMUST00000090042.11, Tmem87a:ENSMUST00000110729.1	Tmem87a	NA	NA	FALSE	FALSE	0.861596	NA	FALSE
488	0.0410237	0.0938281	0.0232558	0.0169408	0.00631498	FALSE	0.323273	2 vs 1	0.01263	2 vs 1	-0.953488	-0.966118	Opa3:ENSMUST00000063976.8, Opa3:ENSMUST00000161711.1	Opa3	0.0550729	0.116976	FALSE	FALSE	0.0938281	0.124259	FALSE
489	0.431435	0.0941217	0.933271	0.927019	0.00625239	FALSE	0.0962869	1 vs 2	0.0125048	1 vs 2	0.866542	0.854037	Camkk2:ENSMUST00000200109.4, Camkk2:ENSMUST00000196742.1	Camkk2	0.48183	0.116976	FALSE	FALSE	0.431435	0.501847	FALSE
490	0.624149	NA	0.961176	0.954955	0.00622107	TRUE	0.155118	1 vs 2	0.0124421	1 vs 2	0.922352	0.90991	Lrrc28:ENSMUST00000053950.9, Lrrc28:ENSMUST00000032775.11	Lrrc28	NA	NA	FALSE	FALSE	0.624149	NA	FALSE
491	0.771276	0.572996	0.851383	0.84539	0.00599333	TRUE	0.0465999	2 vs 1	0.0119867	2 vs 1	0.702767	0.69078	2210418O10Rik:ENSMUST00000135430.1, 2210418O10Rik:ENSMUST00000099009.8	2210418O10Rik	NA	NA	FALSE	FALSE	0.771276	NA	FALSE
492	0.817927	0.0290079	0.858824	0.853138	0.00568601	TRUE	0.0461287	1 vs 2	0.011372	1 vs 2	0.717647	0.706275	Adat1:ENSMUST00000034427.11, Adat1:ENSMUST00000120457.1	Adat1	NA	NA	FALSE	FALSE	0.817927	NA	FALSE
493	0.875545	NA	0.92735	0.921811	0.00553973	TRUE	0.0794769	1 vs 2	0.0110795	1 vs 2	0.854701	0.843621	Ppp1r12b:ENSMUST00000168381.7, Ppp1r12b:ENSMUST00000112163.1	Ppp1r12b	NA	NA	FALSE	FALSE	0.875545	NA	FALSE
494	1	NA	0.116505	0.111111	0.00539374	TRUE	0.0534887	2 vs 1	0.0107875	2 vs 1	-0.76699	-0.777778	Grk4:ENSMUST00000074651.10, Grk4:ENSMUST00000001112.13	Grk4	NA	NA	FALSE	FALSE	1	NA	FALSE
495	0.506554	0.135177	0.968376	0.963625	0.00475091	TRUE	0.144881	1 vs 2	0.00950183	1 vs 2	0.936752	0.92725	Tnfrsf19:ENSMUST00000111236.3, Tnfrsf19:ENSMUST00000224371.1	Tnfrsf19	NA	NA	FALSE	FALSE	0.506554	NA	FALSE
496	0.383067	0.624587	0.955164	0.950446	0.00471832	FALSE	0.10501	1 vs 2	0.00943664	1 vs 2	0.910328	0.900891	Cnpy3:ENSMUST00000059844.12, Cnpy3:ENSMUST00000121671.1	Cnpy3	0.434	0.65844	FALSE	FALSE	0.624587	0.689684	FALSE
497	0.660583	0.893732	0.846595	0.842208	0.00438706	FALSE	0.0333921	2 vs 1	0.00877411	2 vs 1	0.693191	0.684417	Agpat5:ENSMUST00000033847.4, Agpat5:ENSMUST00000149565.7	Agpat5	0.711398	0.912498	FALSE	FALSE	0.893732	0.934248	FALSE
498	0.295667	NA	0.00432277	0	0.00432277	TRUE	Inf	1 vs 2	0.00864553	1 vs 2	-0.991354	-1	Fam126a:ENSMUST00000101513.8, Fam126a:ENSMUST00000030849.12	Fam126a	NA	NA	FALSE	FALSE	0.295667	NA	FALSE
499	1	NA	0.973684	0.969457	0.0042272	TRUE	0.153317	2 vs 1	0.00845439	2 vs 1	0.947368	0.938914	Nsl1:ENSMUST00000139340.7, Nsl1:ENSMUST00000078259.7	Nsl1	NA	NA	FALSE	FALSE	1	NA	FALSE
500	0.000893681	3.95718e-07	0.975833	0.971638	0.00419503	FALSE	0.164372	2 vs 1	0.00839005	2 vs 1	0.951666	0.943276	Tcp1:ENSMUST00000233286.1, Tcp1:ENSMUST00000151287.7	Tcp1	0.00139017	8.1018e-07	FALSE	FALSE	0.000893681	0.00147172	FALSE
501	0.476373	0.783906	0.972044	0.968021	0.00402268	FALSE	0.138584	1 vs 2	0.00804535	1 vs 2	0.944088	0.936043	Hmgcr:ENSMUST00000022176.14, Hmgcr:ENSMUST00000170287.7	Hmgcr	0.530506	0.815346	FALSE	FALSE	0.783906	0.837306	FALSE
502	0.783205	0.133922	0.925311	0.921387	0.00392392	FALSE	0.055453	2 vs 1	0.00784784	2 vs 1	0.850622	0.842775	Msl2:ENSMUST00000189616.1, Msl2:ENSMUST00000085177.4	Msl2	0.8231	0.161485	FALSE	FALSE	0.783205	0.837306	FALSE
503	0.925161	NA	0.916832	0.912941	0.00389051	TRUE	0.04997	2 vs 1	0.00778101	2 vs 1	0.833663	0.825882	Trib1:ENSMUST00000118228.1, Trib1:ENSMUST00000067543.7	Trib1	NA	NA	FALSE	FALSE	0.925161	NA	FALSE
504	0.967037	0.245051	0.940305	0.936416	0.00388902	TRUE	0.0672586	2 vs 1	0.00777804	2 vs 1	0.88061	0.872832	Tspan17:ENSMUST00000163915.7, Tspan17:ENSMUST00000026993.13	Tspan17	NA	NA	FALSE	FALSE	0.967037	NA	FALSE
505	0.734163	0.966922	0.95894	0.955157	0.00378345	FALSE	0.0920971	2 vs 1	0.00756689	2 vs 1	0.917881	0.910314	Tlk2:ENSMUST00000145048.7, Tlk2:ENSMUST00000106939.8	Tlk2	0.777816	0.976968	FALSE	FALSE	0.966922	0.992234	FALSE
506	0.820153	0.615725	0.899324	0.895886	0.00343851	TRUE	0.0374148	2 vs 1	0.00687703	2 vs 1	0.798649	0.791772	Mtmr2:ENSMUST00000156801.7, Mtmr2:ENSMUST00000034396.13	Mtmr2	NA	NA	FALSE	FALSE	0.820153	NA	FALSE
507	0.862336	0.972377	0.872745	0.869381	0.00336371	TRUE	0.029951	2 vs 1	0.00672742	2 vs 1	0.745489	0.738762	Blvrb:ENSMUST00000133750.7, Blvrb:ENSMUST00000037399.15	Blvrb	NA	NA	FALSE	FALSE	0.972377	NA	FALSE
508	0.825039	0.869469	0.0580357	0.0547645	0.0032712	TRUE	0.0614829	2 vs 1	0.0065424	2 vs 1	-0.883929	-0.890471	Nol9:ENSMUST00000084116.12, Nol9:ENSMUST00000103197.4	Nol9	NA	NA	FALSE	FALSE	0.869469	NA	FALSE
509	0.960957	0.948225	0.620447	0.617464	0.00298292	TRUE	0.0126476	2 vs 1	0.00596583	2 vs 1	0.240893	0.234927	Efl1:ENSMUST00000207868.1, Efl1:ENSMUST00000179489.7	Efl1	NA	NA	FALSE	FALSE	0.960957	NA	FALSE
510	0.909695	0.988338	0.635565	0.632739	0.00282613	FALSE	0.0121815	2 vs 1	0.00565227	2 vs 1	0.27113	0.265477	Fbxo16:ENSMUST00000169656.2, Fbxo16:ENSMUST00000226005.1	Fbxo16	0.928647	0.989781	FALSE	FALSE	0.988338	0.999682	FALSE
511	0.922628	0.961543	0.920094	0.917404	0.00268988	TRUE	0.0360366	2 vs 1	0.00537975	2 vs 1	0.840188	0.834808	Sufu:ENSMUST00000118440.2, Sufu:ENSMUST00000039922.12	Sufu	NA	NA	FALSE	FALSE	0.961543	NA	FALSE
512	0.317583	0.603606	0.513879	0.511211	0.00266767	FALSE	0.0106774	1 vs 2	0.00533534	1 vs 2	0.0277574	0.0224221	Selenoh:ENSMUST00000117299.8, Selenoh:ENSMUST00000189988.1	Selenoh	0.369171	0.643295	FALSE	FALSE	0.603606	0.672198	FALSE
513	0.751147	0.0474918	0.918422	0.915798	0.00262423	FALSE	0.0345231	1 vs 2	0.00524846	1 vs 2	0.836844	0.831595	Nfs1:ENSMUST00000029147.15, Nfs1:ENSMUST00000109600.1	Nfs1	0.793604	0.062203	FALSE	FALSE	0.751147	0.808927	FALSE
514	0.905278	0.912372	0.951636	0.949153	0.0024833	TRUE	0.0526841	1 vs 2	0.00496661	1 vs 2	0.903272	0.898305	Stxbp4:ENSMUST00000143203.7, Stxbp4:ENSMUST00000107875.7	Stxbp4	NA	NA	FALSE	FALSE	0.912372	NA	FALSE
515	0.871944	0.982416	0.627397	0.625	0.00239726	FALSE	0.0102415	2 vs 1	0.00479452	2 vs 1	0.254795	0.25	Phf14:ENSMUST00000115510.7, Phf14:ENSMUST00000115511.8	Phf14	0.901853	0.987493	FALSE	FALSE	0.982416	0.999682	FALSE
516	0.904691	0.952727	0.884877	0.882543	0.00233392	FALSE	0.0227116	2 vs 1	0.00466785	2 vs 1	0.769754	0.765086	Casd1:ENSMUST00000181734.7, Casd1:ENSMUST00000015333.11	Casd1	0.928374	0.967652	FALSE	FALSE	0.952727	0.985406	FALSE
517	0.983766	0.64343	0.676056	0.673745	0.00231116	TRUE	0.0105336	2 vs 1	0.00462233	2 vs 1	0.352113	0.34749	Cdk12:ENSMUST00000003203.13, Cdk12:ENSMUST00000107539.7	Cdk12	NA	NA	FALSE	FALSE	0.983766	NA	FALSE
518	0.938649	0.000670374	0.539164	0.53719	0.00197441	TRUE	0.00794396	2 vs 1	0.00394882	2 vs 1	0.078329	0.0743802	Dcp2:ENSMUST00000202306.1, Dcp2:ENSMUST00000025350.9	Dcp2	NA	NA	FALSE	FALSE	0.938649	NA	FALSE
519	0.68799	0.0692952	0.963249	0.961422	0.00182699	FALSE	0.0504147	1 vs 2	0.00365398	1 vs 2	0.926498	0.922844	Itgb1bp1:ENSMUST00000076260.11, Itgb1bp1:ENSMUST00000172834.1	Itgb1bp1	0.734856	0.0886705	FALSE	FALSE	0.68799	0.742954	FALSE
520	0.908313	0.989781	0.684897	0.683153	0.00174432	FALSE	0.00807055	2 vs 1	0.00348865	2 vs 1	0.369794	0.366305	Clcc1:ENSMUST00000106613.1, Clcc1:ENSMUST00000106609.7	Clcc1	0.928647	0.989781	FALSE	FALSE	0.989781	0.999682	FALSE
521	0.684745	0.619304	0.0309278	0.029535	0.00139281	FALSE	0.047516	1 vs 2	0.00278562	1 vs 2	-0.938144	-0.94093	Sh3glb1:ENSMUST00000199531.4, Sh3glb1:ENSMUST00000198254.4	Sh3glb1	0.733388	0.658222	FALSE	FALSE	0.684745	0.741492	FALSE
522	1	0.868922	0.905838	0.904564	0.00127373	TRUE	0.0148434	1 vs 2	0.00254745	1 vs 2	0.811676	0.809129	Fnbp1:ENSMUST00000073879.11, Fnbp1:ENSMUST00000113552.8	Fnbp1	NA	NA	FALSE	FALSE	1	NA	FALSE
523	0.913808	0.800183	0.0463127	0.0456316	0.000681076	FALSE	0.0155291	2 vs 1	0.00136215	2 vs 1	-0.907375	-0.908737	Gm14305:ENSMUST00000108980.8, Gm14305:ENSMUST00000108981.8	Gm14305	0.930423	0.830056	FALSE	FALSE	0.913808	0.950167	FALSE
524	1	0.969158	0.886945	0.886555	0.000390196	TRUE	0.00388547	2 vs 1	0.000780393	2 vs 1	0.77389	0.773109	Zbtb24:ENSMUST00000216656.1, Zbtb24:ENSMUST00000080771.9	Zbtb24	NA	NA	FALSE	FALSE	1	NA	FALSE
525	1	NA	0.958716	0.958333	0.000382263	TRUE	0.00961546	1 vs 2	0.000764526	1 vs 2	0.917431	0.916667	Slc7a14:ENSMUST00000091259.8, Slc7a14:ENSMUST00000108245.1	Slc7a14	NA	NA	FALSE	FALSE	1	NA	FALSE
526	0.132398	0.148152	0.998782	0.998534	0.000247656	FALSE	0.185293	2 vs 1	0.000495312	2 vs 1	0.997563	0.997068	Hint1:ENSMUST00000117710.1, Hint1:ENSMUST00000020504.5	Hint1	0.165286	0.17517	FALSE	FALSE	0.148152	0.186738	FALSE
527	1	0.145965	0.940316	0.940109	0.000207313	FALSE	0.00368799	1 vs 2	0.000414625	1 vs 2	0.880632	0.880218	Stam2:ENSMUST00000102759.7, Stam2:ENSMUST00000127316.7	Stam2	1	0.17364	FALSE	FALSE	1	1	FALSE
528	1	0.713247	0.821734	0.821612	0.000121472	TRUE	0.00082901	2 vs 1	0.000242944	2 vs 1	0.643468	0.643225	Rapgef6:ENSMUST00000108895.7, Rapgef6:ENSMUST00000102743.9	Rapgef6	NA	NA	FALSE	FALSE	1	NA	FALSE
529	1	5.33641e-06	0.0445545	0.044548	6.55547e-06	FALSE	0.000154006	1 vs 2	1.31109e-05	1 vs 2	-0.910891	-0.910904	Rps28:ENSMUST00000087342.12, Rps28:ENSMUST00000173019.7	Rps28	1	1.02765e-05	FALSE	FALSE	1	1	FALSE
530	1	NA	0.333333	0.333333	0	TRUE	0	1 vs 2	5.55112e-17	1 vs 2	-0.333333	-0.333333	Flt1:ENSMUST00000031653.11, Flt1:ENSMUST00000110529.5	Flt1	NA	NA	FALSE	FALSE	1	NA	FALSE
531	1	NA	0.25	0.25	0	TRUE	0	1 vs 2	0	1 vs 2	-0.5	-0.5	Zcwpw2:ENSMUST00000187803.2, Zcwpw2:ENSMUST00000238919.1	Zcwpw2	NA	NA	FALSE	FALSE	1	NA	FALSE
532	1	NA	0.985507	0.985714	-0.000207039	TRUE	-0.0145988	1 vs 2	-0.000414079	1 vs 2	0.971014	0.971429	Csf1:ENSMUST00000118593.7, Csf1:ENSMUST00000120243.7	Csf1	NA	NA	FALSE	FALSE	1	NA	FALSE
533	0.992032	0.140368	0.929833	0.930096	-0.000263443	FALSE	-0.00404484	2 vs 1	-0.000526887	2 vs 1	0.859665	0.860192	Pmpca:ENSMUST00000114093.1, Pmpca:ENSMUST00000076431.12	Pmpca	0.999682	0.16801	FALSE	FALSE	0.992032	0.999682	FALSE
534	1	0.391087	0.746279	0.746591	-0.000312154	FALSE	-0.00164925	1 vs 2	-0.000624308	1 vs 2	0.492558	0.493182	Zfp787:ENSMUST00000094870.2, Zfp787:ENSMUST00000207957.1	Zfp787	1	0.435911	FALSE	FALSE	1	1	FALSE
535	1	NA	0.81201	0.812325	-0.000314486	TRUE	-0.00206151	1 vs 2	-0.000628972	1 vs 2	0.624021	0.62465	Tfcp2:ENSMUST00000229696.1, Tfcp2:ENSMUST00000229581.1	Tfcp2	NA	NA	FALSE	FALSE	1	NA	FALSE
536	1	NA	0.92381	0.92437	-0.000560224	TRUE	-0.00798635	1 vs 2	-0.00112045	1 vs 2	0.847619	0.848739	Slc2a4:ENSMUST00000018710.12, Slc2a4:ENSMUST00000141837.8	Slc2a4	NA	NA	FALSE	FALSE	1	NA	FALSE
537	0.986488	4.24081e-05	0.784907	0.785489	-0.000581659	FALSE	-0.00344867	1 vs 2	-0.00116332	1 vs 2	0.569815	0.570978	Tenm3:ENSMUST00000033965.13, Tenm3:ENSMUST00000110346.8	Tenm3	0.996658	7.70877e-05	FALSE	FALSE	0.986488	0.999682	FALSE
538	1	0.156279	0.888792	0.889524	-0.000732216	TRUE	-0.00742944	1 vs 2	-0.00146443	1 vs 2	0.777583	0.779048	2610008E11Rik:ENSMUST00000039271.6, 2610008E11Rik:ENSMUST00000220220.1	2610008E11Rik	NA	NA	FALSE	FALSE	1	NA	FALSE
539	0.974693	0.868055	0.924397	0.925412	-0.00101519	FALSE	-0.0146164	1 vs 2	-0.00203037	1 vs 2	0.848794	0.850824	Zfp113:ENSMUST00000049393.14, Zfp113:ENSMUST00000132318.1	Zfp113	0.987286	0.890959	FALSE	FALSE	0.974693	0.994999	FALSE
540	0.966213	0.623233	0.792952	0.793989	-0.00103719	FALSE	-0.00632914	2 vs 1	-0.00207437	2 vs 1	0.585903	0.587977	Pwwp2a:ENSMUST00000061070.5, Pwwp2a:ENSMUST00000094294.4	Pwwp2a	0.981232	0.65844	FALSE	FALSE	0.966213	0.992234	FALSE
541	0.799296	0.469374	0.943083	0.944245	-0.00116152	FALSE	-0.0218493	2 vs 1	-0.00232305	2 vs 1	0.886166	0.888489	Sdf4:ENSMUST00000097734.10, Sdf4:ENSMUST00000050078.12	Sdf4	0.835531	0.514328	FALSE	FALSE	0.799296	0.851424	FALSE
542	0.561739	0.839212	0.893031	0.894396	-0.00136511	FALSE	-0.0143713	1 vs 2	-0.00273021	1 vs 2	0.786062	0.788792	Glo1:ENSMUST00000236335.1, Glo1:ENSMUST00000235171.1	Glo1	0.613375	0.865258	FALSE	FALSE	0.839212	0.883619	FALSE
543	0.731837	0.84079	0.979707	0.981101	-0.00139446	FALSE	-0.0726132	2 vs 1	-0.00278892	2 vs 1	0.959414	0.962203	Ercc1:ENSMUST00000160369.7, Ercc1:ENSMUST00000003645.8	Ercc1	0.777453	0.865258	FALSE	FALSE	0.84079	0.883619	FALSE
544	0.992096	0.305852	0.107375	0.10883	-0.0014543	TRUE	-0.0150837	2 vs 1	-0.0029086	2 vs 1	-0.785249	-0.782341	Grip1:ENSMUST00000041962.15, Grip1:ENSMUST00000130387.7	Grip1	NA	NA	FALSE	FALSE	0.992096	NA	FALSE
545	1	NA	0.96281	0.964286	-0.0014758	TRUE	-0.042023	2 vs 1	-0.00295159	2 vs 1	0.92562	0.928571	Ift140:ENSMUST00000142000.8, Ift140:ENSMUST00000024983.11	Ift140	NA	NA	FALSE	FALSE	1	NA	FALSE
546	0.827631	0.374966	0.929614	0.931308	-0.00169331	FALSE	-0.0261716	1 vs 2	-0.00338662	1 vs 2	0.859229	0.862616	Mettl6:ENSMUST00000055303.4, Mettl6:ENSMUST00000228727.1	Mettl6	0.86056	0.419143	FALSE	FALSE	0.827631	0.876841	FALSE
547	0.792531	0.955547	0.896593	0.898709	-0.00211608	FALSE	-0.0230332	2 vs 1	-0.00423216	2 vs 1	0.793185	0.797417	Tdrd3:ENSMUST00000169504.7, Tdrd3:ENSMUST00000168275.8	Tdrd3	0.830674	0.967989	FALSE	FALSE	0.955547	0.985723	FALSE
548	0.809013	0.351183	0.945481	0.947649	-0.00216842	FALSE	-0.0428769	1 vs 2	-0.00433685	1 vs 2	0.890961	0.895298	Cnot10:ENSMUST00000070117.7, Cnot10:ENSMUST00000216785.1	Cnot10	0.843439	0.395972	FALSE	FALSE	0.809013	0.859439	FALSE
549	0.690033	0.922095	0.922469	0.924761	-0.00229215	FALSE	-0.0324918	2 vs 1	-0.00458431	2 vs 1	0.844938	0.849522	Tmem128:ENSMUST00000119047.7, Tmem128:ENSMUST00000087511.9	Tmem128	0.735035	0.938992	FALSE	FALSE	0.922095	0.956247	FALSE
550	0.884858	0.972395	0.838302	0.840951	-0.00264892	FALSE	-0.0196724	1 vs 2	-0.00529785	1 vs 2	0.676603	0.681901	Ep400:ENSMUST00000041558.14, Ep400:ENSMUST00000146458.8	Ep400	0.912801	0.979953	FALSE	FALSE	0.972395	0.994999	FALSE
551	0.924291	0.16281	0.664006	0.667095	-0.00308873	TRUE	-0.0138762	1 vs 2	-0.00617746	1 vs 2	0.328013	0.33419	Gm14410:ENSMUST00000133301.7, Gm14410:ENSMUST00000108964.1	Gm14410	NA	NA	FALSE	FALSE	0.924291	NA	FALSE
552	0.904548	0.438381	0.912359	0.912417	-5.78289e-05	FALSE	0.0961439	2 vs 1	-0.00621113	3 vs 2	0.803102	0.809313	Harbi1:ENSMUST00000142692.1, Harbi1:ENSMUST00000111322.1, Harbi1:ENSMUST00000090608.5	Harbi1	0.928374	0.483088	FALSE	FALSE	0.904548	0.943039	FALSE
553	0.93631	0.981418	0.921218	0.924399	-0.00318108	TRUE	-0.044663	1 vs 2	-0.00636216	1 vs 2	0.842435	0.848797	Calcoco1:ENSMUST00000023818.10, Calcoco1:ENSMUST00000171838.1	Calcoco1	NA	NA	FALSE	FALSE	0.981418	NA	FALSE
554	0.605573	0.536267	0.936919	0.940157	-0.00323866	FALSE	-0.0561567	2 vs 1	-0.00647731	2 vs 1	0.873838	0.880315	Cnep1r1:ENSMUST00000121097.7, Cnep1r1:ENSMUST00000095214.9	Cnep1r1	0.659401	0.579466	FALSE	FALSE	0.605573	0.672477	FALSE
555	0.933898	0.826098	0.932632	0.936102	-0.00347066	TRUE	-0.0566065	1 vs 2	-0.00694131	1 vs 2	0.865263	0.872204	Rab21:ENSMUST00000020343.8, Rab21:ENSMUST00000218831.1	Rab21	NA	NA	FALSE	FALSE	0.933898	NA	FALSE
556	0.912059	0.766141	0.269276	0.272894	-0.00361807	TRUE	-0.0183105	2 vs 1	-0.00723614	2 vs 1	-0.461449	-0.454212	Zxdc:ENSMUST00000045740.7, Zxdc:ENSMUST00000075117.9	Zxdc	NA	NA	FALSE	FALSE	0.912059	NA	FALSE
557	0.885846	0.981059	0.762319	0.76599	-0.00367101	TRUE	-0.0203696	1 vs 2	-0.00734201	1 vs 2	0.524638	0.53198	Samhd1:ENSMUST00000057725.9, Samhd1:ENSMUST00000109549.2	Samhd1	NA	NA	FALSE	FALSE	0.981059	NA	FALSE
558	1	NA	0.7875	0.791304	-0.00380435	TRUE	-0.0228843	2 vs 1	-0.0076087	2 vs 1	0.575	0.582609	Dennd1b:ENSMUST00000200533.4, Dennd1b:ENSMUST00000168527.7	Dennd1b	NA	NA	FALSE	FALSE	1	NA	FALSE
559	0.888452	0.510657	0.327978	0.33179	-0.00381248	TRUE	-0.0172465	1 vs 2	-0.00762496	1 vs 2	-0.344045	-0.33642	Arrdc4:ENSMUST00000048068.14, Arrdc4:ENSMUST00000118110.2	Arrdc4	NA	NA	FALSE	FALSE	0.888452	NA	FALSE
560	0.753114	0.833329	0.958201	0.962025	-0.00382392	FALSE	-0.0999261	1 vs 2	-0.00764785	1 vs 2	0.916403	0.924051	Rnf141:ENSMUST00000177236.7, Rnf141:ENSMUST00000176716.2	Rnf141	0.793604	0.862141	FALSE	FALSE	0.833329	0.880498	FALSE
561	0.383085	0.543536	0.979632	0.983628	-0.00399553	FALSE	-0.22244	1 vs 2	-0.00799106	1 vs 2	0.959265	0.967256	Pogk:ENSMUST00000131487.7, Pogk:ENSMUST00000127596.2	Pogk	0.434	0.585162	FALSE	FALSE	0.543536	0.611639	FALSE
562	0.832921	0.89291	0.846342	0.850427	-0.00408503	FALSE	-0.0317601	1 vs 2	-0.00817007	1 vs 2	0.692685	0.700855	Zfp87:ENSMUST00000181767.7, Zfp87:ENSMUST00000181573.1	Zfp87	0.86377	0.912498	FALSE	FALSE	0.89291	0.934248	FALSE
563	0.97422	NA	0.865079	0.869231	-0.0041514	TRUE	-0.0360399	1 vs 2	-0.00830281	1 vs 2	0.730159	0.738462	Lrp5:ENSMUST00000025856.16, Lrp5:ENSMUST00000176867.1	Lrp5	NA	NA	FALSE	FALSE	0.97422	NA	FALSE
564	0.35907	0.372507	0.9034	0.907905	-0.00450562	FALSE	-0.0527398	2 vs 1	-0.00901125	2 vs 1	0.8068	0.815811	Cul1:ENSMUST00000143941.2, Cul1:ENSMUST00000031697.8	Cul1	0.410366	0.417595	FALSE	FALSE	0.372507	0.439828	FALSE
565	0.635709	0.00311523	0.243473	0.248183	-0.00471018	FALSE	-0.0254066	2 vs 1	-0.00942037	2 vs 1	-0.513054	-0.503633	Fbln1:ENSMUST00000109432.3, Fbln1:ENSMUST00000057410.13	Fbln1	0.686496	0.00462529	FALSE	FALSE	0.635709	0.696084	FALSE
566	0.241355	0.184682	0.0148675	0.0196464	-0.00477888	FALSE	-0.283579	1 vs 2	-0.00955776	1 vs 2	-0.970265	-0.960707	Smim4:ENSMUST00000064032.9, Smim4:ENSMUST00000090205.4	Smim4	0.286701	0.215094	FALSE	FALSE	0.241355	0.294739	FALSE
567	0.628664	0.651133	0.907662	0.912747	-0.00508502	FALSE	-0.0622308	2 vs 1	-0.01017	2 vs 1	0.815324	0.825494	Dph5:ENSMUST00000106505.7, Dph5:ENSMUST00000043342.9	Dph5	0.681275	0.682725	FALSE	FALSE	0.651133	0.710987	FALSE
568	1	NA	0.78972	0.794872	-0.00515217	TRUE	-0.0313094	2 vs 1	-0.0103043	2 vs 1	0.579439	0.589744	Slc38a6:ENSMUST00000153941.7, Slc38a6:ENSMUST00000140523.7	Slc38a6	NA	NA	FALSE	FALSE	1	NA	FALSE
569	0.23429	0.479741	0.891376	0.896542	-0.00516546	FALSE	-0.0544997	1 vs 2	-0.0103309	1 vs 2	0.782752	0.793083	Cpsf6:ENSMUST00000176686.7, Cpsf6:ENSMUST00000069168.12	Cpsf6	0.280006	0.524211	FALSE	FALSE	0.479741	0.553113	FALSE
570	0.868495	0.708245	0.652198	0.657426	-0.00522794	TRUE	-0.0231294	1 vs 2	-0.0104559	1 vs 2	0.304396	0.314851	Ptpn4:ENSMUST00000064091.11, Ptpn4:ENSMUST00000163621.1	Ptpn4	NA	NA	FALSE	FALSE	0.868495	NA	FALSE
571	0.666723	0.130699	0.947668	0.952922	-0.00525427	FALSE	-0.111337	2 vs 1	-0.0105085	2 vs 1	0.895336	0.905844	Pcgf3:ENSMUST00000112597.7, Pcgf3:ENSMUST00000046975.11	Pcgf3	0.716042	0.158387	FALSE	FALSE	0.666723	0.725987	FALSE
572	1	NA	0.0210526	0.0263158	-0.00526316	TRUE	-0.228534	2 vs 1	-0.0105263	2 vs 1	-0.957895	-0.947368	Nmnat3:ENSMUST00000112935.7, Nmnat3:ENSMUST00000112938.7	Nmnat3	NA	NA	FALSE	FALSE	1	NA	FALSE
573	0.498989	0.670491	0.943538	0.948815	-0.00527694	FALSE	-0.103697	2 vs 1	-0.0105539	2 vs 1	0.887075	0.897629	B3gat2:ENSMUST00000144602.1, B3gat2:ENSMUST00000063663.5	B3gat2	0.55135	0.701132	FALSE	FALSE	0.670491	0.728068	FALSE
574	0.941002	NA	0.951768	0.957143	-0.00537437	TRUE	-0.123771	2 vs 1	-0.0107487	2 vs 1	0.903537	0.914286	Grk5:ENSMUST00000236876.1, Grk5:ENSMUST00000003313.9	Grk5	NA	NA	FALSE	FALSE	0.941002	NA	FALSE
575	0.859072	0.519753	0.524182	0.5296	-0.00541792	TRUE	-0.0217348	2 vs 1	-0.0108358	2 vs 1	0.0483642	0.0592	Ocrl:ENSMUST00000115020.7, Ocrl:ENSMUST00000001202.14	Ocrl	NA	NA	FALSE	FALSE	0.859072	NA	FALSE
576	0.888531	0.461352	0.091954	0.0976744	-0.0057204	TRUE	-0.0666706	1 vs 2	-0.0114408	1 vs 2	-0.816092	-0.804651	Obsl1:ENSMUST00000113567.8, Obsl1:ENSMUST00000113565.2	Obsl1	NA	NA	FALSE	FALSE	0.888531	NA	FALSE
577	0.384179	0.0516424	0.926689	0.932778	-0.00608842	FALSE	-0.0932506	1 vs 2	-0.0121768	1 vs 2	0.853379	0.865556	Ndrg3:ENSMUST00000069600.12, Ndrg3:ENSMUST00000109558.1	Ndrg3	0.434	0.0674124	FALSE	FALSE	0.384179	0.452246	FALSE
578	1	NA	0.993805	1	-0.00619469	TRUE	#NAME?	1 vs 2	-0.0123894	1 vs 2	0.987611	1	Cpeb3:ENSMUST00000079754.10, Cpeb3:ENSMUST00000126781.1	Cpeb3	NA	NA	FALSE	FALSE	1	NA	FALSE
579	0.897749	0.835059	0.258303	0.264781	-0.00647891	TRUE	-0.0335468	2 vs 1	-0.0129578	2 vs 1	-0.483395	-0.470437	Cntln:ENSMUST00000102819.9, Cntln:ENSMUST00000047023.12	Cntln	NA	NA	FALSE	FALSE	0.897749	NA	FALSE
580	0.492407	0.778708	0.644233	0.650823	-0.00659018	FALSE	-0.0288751	2 vs 1	-0.0131804	2 vs 1	0.288466	0.301646	Tprkb:ENSMUST00000089570.6, Tprkb:ENSMUST00000113753.7	Tprkb	0.546809	0.812111	FALSE	FALSE	0.778708	0.836311	FALSE
581	0.0674111	0.00210468	0.0529572	0.0597551	-0.00679787	FALSE	-0.127974	1 vs 2	-0.0135957	1 vs 2	-0.894086	-0.88049	Gm14434:ENSMUST00000122097.8, Gm14434:ENSMUST00000120959.7	Gm14434	0.0863567	0.00318569	FALSE	FALSE	0.0674111	0.0908081	FALSE
582	0.500716	0.237289	0.898599	0.905459	-0.00686032	FALSE	-0.0776583	2 vs 1	-0.0137206	2 vs 1	0.797198	0.810919	Spg7:ENSMUST00000108868.10, Spg7:ENSMUST00000125975.7	Spg7	0.55135	0.273093	FALSE	FALSE	0.500716	0.572247	FALSE
583	0.0585916	0.00171023	0.0535013	0.0605812	-0.00707986	FALSE	-0.131786	1 vs 2	-0.0141597	1 vs 2	-0.892997	-0.878838	Gm14308:ENSMUST00000108990.8, Gm14308:ENSMUST00000119149.7	Gm14308	0.0763053	0.00260893	FALSE	FALSE	0.0585916	0.0805891	FALSE
584	0.0544473	0.00256465	0.0523613	0.059514	-0.00715267	FALSE	-0.13562	1 vs 2	-0.0143053	1 vs 2	-0.895277	-0.880972	Gm4724:ENSMUST00000109046.9, Gm4724:ENSMUST00000152941.1	Gm4724	0.0721058	0.00385192	FALSE	FALSE	0.0544473	0.0754181	FALSE
585	0.411784	0.0661172	0.884945	0.892735	-0.00778964	FALSE	-0.0788687	1 vs 2	-0.0155793	1 vs 2	0.769891	0.78547	Polr3c:ENSMUST00000029741.8, Polr3c:ENSMUST00000125183.1	Polr3c	0.461198	0.0851642	FALSE	FALSE	0.411784	0.481849	FALSE
586	0.855579	0.836799	0.84142	0.849315	-0.00789495	TRUE	-0.0604065	2 vs 1	-0.0157899	2 vs 1	0.68284	0.69863	Slc12a6:ENSMUST00000110987.8, Slc12a6:ENSMUST00000028549.13	Slc12a6	NA	NA	FALSE	FALSE	0.855579	NA	FALSE
587	0.346985	0.630263	0.6982	0.706179	-0.0079794	FALSE	-0.0381589	1 vs 2	-0.0159588	1 vs 2	0.3964	0.412359	Ppil3:ENSMUST00000117069.7, Ppil3:ENSMUST00000114345.8	Ppil3	0.397714	0.662628	FALSE	FALSE	0.630263	0.692054	FALSE
588	0.681228	0.583934	0.915094	0.923228	-0.00813401	TRUE	-0.109555	2 vs 1	-0.016268	2 vs 1	0.830189	0.846457	Pik3r4:ENSMUST00000188784.1, Pik3r4:ENSMUST00000065778.12	Pik3r4	NA	NA	FALSE	FALSE	0.681228	NA	FALSE
589	0.989609	0.990986	0.513043	0.521212	-0.00816864	TRUE	-0.0327137	1 vs 2	-0.0163373	1 vs 2	0.026087	0.0424242	Eaf2:ENSMUST00000114825.2, Eaf2:ENSMUST00000023537.5	Eaf2	NA	NA	FALSE	FALSE	0.990986	NA	FALSE
590	0.510795	0.422232	0.953542	0.961905	-0.00836237	TRUE	-0.207183	2 vs 1	-0.0167247	2 vs 1	0.907085	0.92381	Ermard:ENSMUST00000226599.1, Ermard:ENSMUST00000097393.10	Ermard	NA	NA	FALSE	FALSE	0.510795	NA	FALSE
591	0.136003	0.076794	0.075104	0.0835443	-0.00844026	FALSE	-0.11567	1 vs 2	-0.0168805	1 vs 2	-0.849792	-0.832911	Cdc23:ENSMUST00000025228.11, Cdc23:ENSMUST00000133181.1	Cdc23	0.169236	0.0969898	FALSE	FALSE	0.136003	0.175372	FALSE
592	1	NA	0.945946	0.954955	-0.00900901	TRUE	-0.1918	2 vs 1	-0.018018	2 vs 1	0.891892	0.90991	Med12l:ENSMUST00000040846.14, Med12l:ENSMUST00000199659.4	Med12l	NA	NA	FALSE	FALSE	1	NA	FALSE
593	0.629136	0.0644	0.667478	0.676674	-0.00919627	FALSE	-0.0417294	2 vs 1	-0.0183925	2 vs 1	0.334956	0.353349	Snx21:ENSMUST00000152471.1, Snx21:ENSMUST00000172577.7	Snx21	0.681275	0.0832279	FALSE	FALSE	0.629136	0.692054	FALSE
594	1	NA	0.923963	0.933333	-0.0093702	TRUE	-0.141603	1 vs 2	-0.0187404	1 vs 2	0.847926	0.866667	Slc45a1:ENSMUST00000037827.9, Slc45a1:ENSMUST00000117997.1	Slc45a1	NA	NA	FALSE	FALSE	1	NA	FALSE
595	0.879396	0.969949	0.716867	0.726316	-0.00944832	TRUE	-0.0470341	1 vs 2	-0.0188966	1 vs 2	0.433735	0.452632	Fam228b:ENSMUST00000219898.1, Fam228b:ENSMUST00000053458.6	Fam228b	NA	NA	FALSE	FALSE	0.969949	NA	FALSE
596	0.0817839	0.137687	0.0847437	0.0943215	-0.00957778	FALSE	-0.117597	1 vs 2	-0.0191556	1 vs 2	-0.830513	-0.811357	Brwd1:ENSMUST00000232755.1, Brwd1:ENSMUST00000113827.3	Brwd1	0.103752	0.16531	FALSE	FALSE	0.137687	0.176384	FALSE
597	1	NA	0.931567	0.941176	-0.00960997	TRUE	-0.161584	2 vs 1	-0.0192199	2 vs 1	0.863133	0.882353	Myt1l:ENSMUST00000218198.1, Myt1l:ENSMUST00000049784.16	Myt1l	NA	NA	FALSE	FALSE	1	NA	FALSE
598	0.46894	0.391016	0.941298	0.951027	-0.00972922	TRUE	-0.191491	1 vs 2	-0.0194584	1 vs 2	0.882595	0.902054	Cdc27:ENSMUST00000093923.8, Cdc27:ENSMUST00000106961.1	Cdc27	NA	NA	FALSE	FALSE	0.46894	NA	FALSE
599	0.679976	NA	0.943396	0.953191	-0.00979526	TRUE	-0.20034	1 vs 2	-0.0195905	1 vs 2	0.886792	0.906383	Zfp738:ENSMUST00000137496.9, Zfp738:ENSMUST00000125495.9	Zfp738	NA	NA	FALSE	FALSE	0.679976	NA	FALSE
600	0.653994	0.0288497	0.198704	0.208753	-0.0100494	TRUE	-0.061958	2 vs 1	-0.0200988	2 vs 1	-0.602592	-0.582493	Mms22l:ENSMUST00000138567.8, Mms22l:ENSMUST00000108222.8	Mms22l	NA	NA	FALSE	FALSE	0.653994	NA	FALSE
601	0.972372	NA	0.714286	0.724409	-0.0101237	TRUE	-0.0501498	2 vs 1	-0.0202475	2 vs 1	0.428571	0.448819	Bend7:ENSMUST00000115022.7, Bend7:ENSMUST00000056914.6	Bend7	NA	NA	FALSE	FALSE	0.972372	NA	FALSE
602	0.436347	0.660497	0.0880705	0.0982143	-0.0101438	TRUE	-0.1202	1 vs 2	-0.0202877	1 vs 2	-0.823859	-0.803571	Taf8:ENSMUST00000233174.1, Taf8:ENSMUST00000233121.1	Taf8	NA	NA	FALSE	FALSE	0.660497	NA	FALSE
603	0.182096	NA	0.976489	0.986717	-0.0102282	TRUE	-0.581422	2 vs 1	-0.0204565	2 vs 1	0.952978	0.973435	Apc:ENSMUST00000066133.6, Apc:ENSMUST00000079362.12	Apc	NA	NA	FALSE	FALSE	0.182096	NA	FALSE
604	0.647811	0.435922	0.872973	0.88331	-0.0103368	TRUE	-0.0966483	2 vs 1	-0.0206736	2 vs 1	0.745946	0.76662	Riox2:ENSMUST00000120674.7, Riox2:ENSMUST00000023407.11	Riox2	NA	NA	FALSE	FALSE	0.647811	NA	FALSE
605	0.810904	NA	0.790993	0.801508	-0.0105145	TRUE	-0.257446	1 vs 3	-0.0210289	1 vs 3	0.581986	0.603015	Ern1:ENSMUST00000001059.8, Ern1:ENSMUST00000106801.7, Ern1:ENSMUST00000106799.1	Ern1	NA	NA	FALSE	FALSE	0.810904	NA	FALSE
606	0.817936	0.905906	0.934761	0.945455	-0.0106931	TRUE	-0.190391	2 vs 1	-0.0213862	2 vs 1	0.869523	0.890909	Kcnc3:ENSMUST00000209177.1, Kcnc3:ENSMUST00000207493.1	Kcnc3	NA	NA	FALSE	FALSE	0.905906	NA	FALSE
607	0.15872	NA	0.974731	0.985507	-0.0107761	FALSE	-0.566917	2 vs 1	-0.0215521	2 vs 1	0.949462	0.971014	St3gal2:ENSMUST00000117534.7, St3gal2:ENSMUST00000034197.4	St3gal2	0.193224	NA	FALSE	FALSE	0.15872	0.19878	FALSE
608	0.318316	0.00550776	0.484372	0.495553	-0.0111804	FALSE	-0.0447416	2 vs 1	-0.0223609	2 vs 1	-0.0312554	-0.00889454	Gabbr1:ENSMUST00000174456.7, Gabbr1:ENSMUST00000025338.15	Gabbr1	0.369171	0.00790598	FALSE	FALSE	0.318316	0.380426	FALSE
609	0.12318	0.231292	0.934835	0.946139	-0.0113038	FALSE	-0.202532	2 vs 1	-0.0226076	2 vs 1	0.86967	0.892278	Ip6k1:ENSMUST00000176854.6, Ip6k1:ENSMUST00000035214.10	Ip6k1	0.15427	0.266982	FALSE	FALSE	0.231292	0.284221	FALSE
610	0.268474	0.767014	0.935237	0.947198	-0.0119615	TRUE	-0.216903	2 vs 1	-0.023923	2 vs 1	0.870474	0.894397	Spred1:ENSMUST00000110901.1, Spred1:ENSMUST00000028829.12	Spred1	NA	NA	FALSE	FALSE	0.767014	NA	FALSE
611	0.294824	0.546293	0.935794	0.94795	-0.0121556	FALSE	-0.22279	2 vs 1	-0.0243112	2 vs 1	0.871588	0.895899	Astn1:ENSMUST00000194369.5, Astn1:ENSMUST00000046110.15	Astn1	0.346021	0.585422	FALSE	FALSE	0.546293	0.611848	FALSE
612	2.94165e-36	5.03806e-38	0.0410273	0.0532784	-0.0122511	FALSE	-0.27415	1 vs 2	-0.0245022	1 vs 2	-0.917945	-0.893443	Hnrnpa2b1:ENSMUST00000069949.12, Hnrnpa2b1:ENSMUST00000204188.2	Hnrnpa2b1	1.31037e-35	2.39001e-37	FALSE	FALSE	2.94165e-36	1.35662e-35	FALSE
613	0.312495	0.514291	0.889955	0.902482	-0.0125274	FALSE	-0.134835	1 vs 2	-0.0250548	1 vs 2	0.77991	0.804965	Terf2:ENSMUST00000133925.7, Terf2:ENSMUST00000116425.2	Terf2	0.364577	0.558825	FALSE	FALSE	0.514291	0.583034	FALSE
614	0.502276	NA	0.977358	0.98995	-0.0125913	TRUE	-0.824988	1 vs 2	-0.0251825	1 vs 2	0.954717	0.979899	Setdb2:ENSMUST00000161459.7, Setdb2:ENSMUST00000111253.2	Setdb2	NA	NA	FALSE	FALSE	0.502276	NA	FALSE
615	0.385736	0.50029	0.860552	0.873239	-0.0126878	FALSE	-0.110031	2 vs 1	-0.0253757	2 vs 1	0.721103	0.746479	Blvra:ENSMUST00000110389.9, Blvra:ENSMUST00000002064.14	Blvra	0.434507	0.545134	FALSE	FALSE	0.50029	0.572247	FALSE
616	0.73791	0.803062	0.262963	0.275758	-0.0127946	TRUE	-0.0650209	2 vs 1	-0.0255892	2 vs 1	-0.474074	-0.448485	Armc9:ENSMUST00000131412.7, Armc9:ENSMUST00000027434.14	Armc9	NA	NA	FALSE	FALSE	0.803062	NA	FALSE
617	0.104234	0.258482	0.671987	0.684847	-0.0128603	FALSE	-0.0589529	2 vs 1	-0.0257206	2 vs 1	0.343974	0.369695	Ube3a:ENSMUST00000202945.3, Ube3a:ENSMUST00000200758.3	Ube3a	0.131382	0.295733	FALSE	FALSE	0.258482	0.314673	FALSE
618	0.556634	0.253552	0.788421	0.801389	-0.0129678	TRUE	-0.0795636	2 vs 1	-0.0259357	2 vs 1	0.576842	0.602778	Larp4:ENSMUST00000230956.1, Larp4:ENSMUST00000100206.3	Larp4	NA	NA	FALSE	FALSE	0.556634	NA	FALSE
619	0.00349291	0.00696734	0.940857	0.953872	-0.0130154	FALSE	-0.262283	2 vs 1	-0.0260308	2 vs 1	0.881713	0.907744	Ypel1:ENSMUST00000232574.1, Ypel1:ENSMUST00000035682.15	Ypel1	0.00514744	0.00989159	FALSE	FALSE	0.00696734	0.010586	FALSE
620	0.881867	0.391626	0.468433	0.48155	-0.0131169	TRUE	-0.0792782	1 vs 3	-0.0262338	1 vs 3	-0.0631342	-0.0369004	Letm2:ENSMUST00000079160.7, Letm2:ENSMUST00000210810.1, Letm2:ENSMUST00000210616.1	Letm2	NA	NA	FALSE	FALSE	0.881867	NA	FALSE
621	0.878242	NA	0.960894	0.974026	-0.0131321	TRUE	-0.422757	1 vs 2	-0.0262642	1 vs 2	0.921788	0.948052	Tfpi:ENSMUST00000111722.7, Tfpi:ENSMUST00000111711.7	Tfpi	NA	NA	FALSE	FALSE	0.878242	NA	FALSE
622	0.0536589	0.00321323	0.910483	0.923645	-0.0131624	FALSE	-0.173393	2 vs 1	-0.0263248	2 vs 1	0.820966	0.847291	Dhrs4:ENSMUST00000226168.1, Dhrs4:ENSMUST00000022821.7	Dhrs4	0.0713027	0.00473464	FALSE	FALSE	0.0536589	0.0745897	FALSE
623	0.892872	NA	0.781915	0.795082	-0.0131671	TRUE	-0.0789746	1 vs 2	-0.0263341	1 vs 2	0.56383	0.590164	Sbno2:ENSMUST00000219260.1, Sbno2:ENSMUST00000217972.1	Sbno2	NA	NA	FALSE	FALSE	0.892872	NA	FALSE
624	0.000421695	0.000490715	0.955337	0.968881	-0.0135434	FALSE	-0.375388	1 vs 2	-0.0270868	1 vs 2	0.910675	0.937762	Alcam:ENSMUST00000023312.13, Alcam:ENSMUST00000168071.1	Alcam	0.00069165	0.000794987	FALSE	FALSE	0.000490715	0.000835799	FALSE
625	0.192866	0.159216	0.920728	0.934413	-0.0136852	FALSE	-0.204264	2 vs 1	-0.0273704	2 vs 1	0.841455	0.868826	Polr3f:ENSMUST00000110017.2, Polr3f:ENSMUST00000028914.8	Polr3f	0.232626	0.187115	FALSE	FALSE	0.192866	0.240011	FALSE
626	0.0341467	0.144982	0.92413	0.937949	-0.0138184	FALSE	-0.215898	2 vs 1	-0.0276369	2 vs 1	0.84826	0.875897	Htatsf1:ENSMUST00000114751.8, Htatsf1:ENSMUST00000088652.5	Htatsf1	0.0464775	0.173	FALSE	FALSE	0.144982	0.185123	FALSE
627	0.390323	0.549536	0.926594	0.940574	-0.0139793	TRUE	-0.226238	1 vs 2	-0.0279586	1 vs 2	0.853189	0.881148	P4htm:ENSMUST00000006853.10, P4htm:ENSMUST00000193621.1	P4htm	NA	NA	FALSE	FALSE	0.549536	NA	FALSE
628	0.0718859	NA	0.97335	0.98741	-0.0140603	FALSE	-0.764244	2 vs 1	-0.0281207	2 vs 1	0.946699	0.97482	Rmc1:ENSMUST00000126523.8, Rmc1:ENSMUST00000025276.14	Rmc1	0.0917892	NA	FALSE	FALSE	0.0718859	0.096175	FALSE
629	1	NA	0.7	0.714286	-0.0142857	TRUE	-0.0689929	1 vs 2	-0.0285714	1 vs 2	0.4	0.428571	Cfap206:ENSMUST00000029971.11, Cfap206:ENSMUST00000108136.7	Cfap206	NA	NA	FALSE	FALSE	1	NA	FALSE
630	0.789881	NA	0.376784	0.391304	-0.0145203	TRUE	-0.0613883	1 vs 2	-0.0290407	1 vs 2	-0.246432	-0.217391	Ezh1:ENSMUST00000107284.7, Ezh1:ENSMUST00000100417.2	Ezh1	NA	NA	FALSE	FALSE	0.789881	NA	FALSE
631	0.958731	NA	0.808989	0.823529	-0.0145406	TRUE	-0.0969923	1 vs 2	-0.0290813	1 vs 2	0.617978	0.647059	Ccdc15:ENSMUST00000239439.1, Ccdc15:ENSMUST00000216042.1	Ccdc15	NA	NA	FALSE	FALSE	0.958731	NA	FALSE
632	0.269725	0.520741	0.741269	0.756201	-0.0149315	FALSE	-0.0793857	2 vs 1	-0.029863	2 vs 1	0.482539	0.512402	Zfp606:ENSMUST00000123589.7, Zfp606:ENSMUST00000098822.9	Zfp606	0.318471	0.564257	FALSE	FALSE	0.520741	0.588272	FALSE
633	0.356848	0.434192	0.750789	0.765875	-0.0150866	TRUE	-0.0823421	1 vs 2	-0.0301731	1 vs 2	0.501577	0.53175	Trps1:ENSMUST00000165201.8, Trps1:ENSMUST00000183421.1	Trps1	NA	NA	FALSE	FALSE	0.434192	NA	FALSE
634	0.145356	0.318045	0.921273	0.936664	-0.0153913	TRUE	-0.234105	2 vs 1	-0.0307826	2 vs 1	0.842546	0.873329	Jade1:ENSMUST00000191952.1, Jade1:ENSMUST00000026865.14	Jade1	NA	NA	FALSE	FALSE	0.318045	NA	FALSE
635	0.424993	NA	0.964371	0.979899	-0.015529	TRUE	-0.588402	1 vs 2	-0.0310579	1 vs 2	0.928741	0.959799	Bdp1:ENSMUST00000038104.11, Bdp1:ENSMUST00000109379.8	Bdp1	NA	NA	FALSE	FALSE	0.424993	NA	FALSE
636	0.365091	0.459247	0.76659	0.782167	-0.0155775	FALSE	-0.089187	1 vs 2	-0.0311551	1 vs 2	0.533179	0.564334	Ube4a:ENSMUST00000117506.8, Ube4a:ENSMUST00000138559.8	Ube4a	0.416034	0.504653	FALSE	FALSE	0.459247	0.531047	FALSE
637	0.137357	0.0947976	0.103589	0.119469	-0.0158797	FALSE	-0.160497	2 vs 1	-0.0317595	2 vs 1	-0.792821	-0.761062	Cspp1:ENSMUST00000122156.7, Cspp1:ENSMUST00000071087.11	Cspp1	0.169854	0.11744	FALSE	FALSE	0.137357	0.176384	FALSE
638	0.488205	0.633956	0.216071	0.231994	-0.0159225	TRUE	-0.0916225	1 vs 2	-0.031845	1 vs 2	-0.567857	-0.536012	Tinf2:ENSMUST00000227842.1, Tinf2:ENSMUST00000007733.7	Tinf2	NA	NA	FALSE	FALSE	0.633956	NA	FALSE
639	0.293923	0.234832	0.886333	0.902475	-0.0161416	TRUE	-0.171208	1 vs 2	-0.0322833	1 vs 2	0.772666	0.804949	Rhobtb3:ENSMUST00000022078.11, Rhobtb3:ENSMUST00000109606.2	Rhobtb3	NA	NA	FALSE	FALSE	0.293923	NA	FALSE
640	0.118195	0.28515	0.647137	0.663295	-0.0161579	FALSE	-0.0715342	2 vs 1	-0.0323159	2 vs 1	0.294274	0.32659	Yars2:ENSMUST00000159962.7, Yars2:ENSMUST00000059955.14	Yars2	0.148501	0.325289	FALSE	FALSE	0.28515	0.343935	FALSE
641	9.8835e-05	9.89072e-05	0.952912	0.969173	-0.0162609	FALSE	-0.440543	2 vs 1	-0.0325218	2 vs 1	0.905824	0.938345	Stx6:ENSMUST00000195302.5, Stx6:ENSMUST00000027743.12	Stx6	0.000174519	0.000173304	FALSE	FALSE	9.89072e-05	0.000181176	FALSE
642	0.00041094	0.000237428	0.973208	0.989644	-0.0164357	FALSE	-0.967274	1 vs 2	-0.0328714	1 vs 2	0.946417	0.979288	Pde7a:ENSMUST00000099195.9, Pde7a:ENSMUST00000121951.1	Pde7a	0.000679698	0.000398102	FALSE	FALSE	0.00041094	0.00071278	FALSE
643	0.236455	0.435474	0.911871	0.928333	-0.0164619	FALSE	-0.224663	1 vs 2	-0.0329238	1 vs 2	0.823743	0.856667	Nln:ENSMUST00000109315.4, Nln:ENSMUST00000224945.1	Nln	0.281734	0.481249	FALSE	FALSE	0.435474	0.505047	FALSE
644	0.238673	NA	0.957303	0.973799	-0.0164958	TRUE	-0.505412	2 vs 1	-0.0329915	2 vs 1	0.914607	0.947598	Zcchc4:ENSMUST00000031077.12, Zcchc4:ENSMUST00000113904.8	Zcchc4	NA	NA	FALSE	FALSE	0.238673	NA	FALSE
645	0.808011	NA	0.895161	0.911765	-0.0166034	TRUE	-0.190794	1 vs 2	-0.0332068	1 vs 2	0.790323	0.823529	Tbc1d2b:ENSMUST00000041767.13, Tbc1d2b:ENSMUST00000128874.2	Tbc1d2b	NA	NA	FALSE	FALSE	0.808011	NA	FALSE
646	0.0576328	0.15219	0.844022	0.860905	-0.0168831	FALSE	-0.134364	2 vs 1	-0.0337661	2 vs 1	0.688044	0.72181	Vps37a:ENSMUST00000238339.1, Vps37a:ENSMUST00000098817.3	Vps37a	0.0755588	0.1794	FALSE	FALSE	0.15219	0.191213	FALSE
647	0.664384	0.480249	0.365796	0.383033	-0.0172377	TRUE	-0.0736034	2 vs 1	-0.0344754	2 vs 1	-0.268409	-0.233933	Zfp809:ENSMUST00000215902.1, Zfp809:ENSMUST00000072465.8	Zfp809	NA	NA	FALSE	FALSE	0.664384	NA	FALSE
648	0.0608893	0.0312995	0.820647	0.837961	-0.0173142	FALSE	-0.122399	1 vs 2	-0.0346285	1 vs 2	0.641293	0.675921	Cmss1:ENSMUST00000114371.4, Cmss1:ENSMUST00000232413.1	Cmss1	0.0790351	0.0415763	FALSE	FALSE	0.0608893	0.0834566	FALSE
649	1	NA	0.255319	0.272727	-0.0174081	TRUE	-0.0896122	2 vs 1	-0.0348162	2 vs 1	-0.489362	-0.454545	Lgi3:ENSMUST00000226548.1, Lgi3:ENSMUST00000047331.7	Lgi3	NA	NA	FALSE	FALSE	1	NA	FALSE
650	0.331034	0.0776063	0.562088	0.579624	-0.0175358	FALSE	-0.0715889	1 vs 2	-0.0350716	1 vs 2	0.124177	0.159248	Sbf2:ENSMUST00000164759.7, Sbf2:ENSMUST00000171218.7	Sbf2	0.381662	0.0976986	FALSE	FALSE	0.331034	0.393228	FALSE
651	0.00758452	0.0313158	0.903609	0.92146	-0.0178514	FALSE	-0.224371	2 vs 1	-0.0357027	2 vs 1	0.807217	0.84292	Crk:ENSMUST00000093115.3, Crk:ENSMUST00000108425.7	Crk	0.010971	0.0415763	FALSE	FALSE	0.0313158	0.0441575	FALSE
652	1	NA	0.857143	0.875	-0.0178571	TRUE	-0.154151	1 vs 2	-0.0357143	1 vs 2	0.714286	0.75	Gfap:ENSMUST00000067444.9, Gfap:ENSMUST00000077902.4	Gfap	NA	NA	FALSE	FALSE	1	NA	FALSE
653	0.0403491	5.18917e-05	0.107303	0.125367	-0.018065	FALSE	-0.176041	1 vs 2	-0.0361299	1 vs 2	-0.785395	-0.749265	Dtd2:ENSMUST00000085404.9, Dtd2:ENSMUST00000021339.7	Dtd2	0.0543534	9.38877e-05	FALSE	FALSE	0.0403491	0.0562877	FALSE
654	2.67056e-12	4.14717e-10	0.0390733	0.0571565	-0.0180832	FALSE	-0.399352	1 vs 2	-0.0361665	1 vs 2	-0.921853	-0.885687	Pbx1:ENSMUST00000188912.6, Pbx1:ENSMUST00000176540.7	Pbx1	6.4621e-12	9.54585e-10	FALSE	FALSE	4.14717e-10	9.85267e-10	FALSE
655	2.42413e-26	2.62661e-25	0.68212	0.700832	-0.018712	FALSE	-0.0877312	1 vs 2	-0.037424	1 vs 2	0.364239	0.401663	Nme1:ENSMUST00000135884.7, Nme1:ENSMUST00000107844.2	Nme1	8.56088e-26	9.37387e-25	FALSE	FALSE	2.62661e-25	9.53362e-25	FALSE
656	0.00141967	0.000728235	0.917479	0.936255	-0.0187762	FALSE	-0.278422	2 vs 1	-0.0375523	2 vs 1	0.834958	0.87251	Idnk:ENSMUST00000226010.1, Idnk:ENSMUST00000051490.14	Idnk	0.00215702	0.001161	FALSE	FALSE	0.00141967	0.00225308	FALSE
657	0.141255	0.288031	0.781212	0.800588	-0.0193759	FALSE	-0.117229	2 vs 1	-0.0387517	2 vs 1	0.562425	0.601176	Tmx3:ENSMUST00000235634.1, Tmx3:ENSMUST00000025515.6	Tmx3	0.174125	0.327614	FALSE	FALSE	0.288031	0.346344	FALSE
658	0.477686	NA	0.0744681	0.0938776	-0.0194095	TRUE	-0.252815	2 vs 1	-0.0388189	2 vs 1	-0.851064	-0.812245	Wls:ENSMUST00000068952.9, Wls:ENSMUST00000198878.1	Wls	NA	NA	FALSE	FALSE	0.477686	NA	FALSE
659	0.000242966	0.00113979	0.574788	0.594236	-0.0194488	FALSE	-0.0800949	2 vs 1	-0.0388977	2 vs 1	0.149575	0.188473	Ccnh:ENSMUST00000164127.7, Ccnh:ENSMUST00000022030.10	Ccnh	0.000414099	0.00177351	FALSE	FALSE	0.00113979	0.00185156	FALSE
660	0.51378	NA	0.859624	0.879167	-0.0195429	TRUE	-0.172394	1 vs 2	-0.0390859	1 vs 2	0.719247	0.758333	Ccdc28a:ENSMUST00000080860.12, Ccdc28a:ENSMUST00000052648.8	Ccdc28a	NA	NA	FALSE	FALSE	0.51378	NA	FALSE
661	0.136425	0.317313	0.495764	0.515341	-0.0195769	FALSE	-0.0783274	1 vs 2	-0.0391539	1 vs 2	-0.00847204	0.0306818	Tmx4:ENSMUST00000038228.10, Tmx4:ENSMUST00000110120.1	Tmx4	0.169236	0.359868	FALSE	FALSE	0.317313	0.380387	FALSE
662	1	NA	0.647059	0.666667	-0.0196078	TRUE	-0.0870114	2 vs 1	-0.0392157	2 vs 1	0.294118	0.333333	Ttc41:ENSMUST00000217747.1, Ttc41:ENSMUST00000075632.13	Ttc41	NA	NA	FALSE	FALSE	1	NA	FALSE
663	0.471514	NA	0.808939	0.828571	-0.0196329	TRUE	-0.132409	1 vs 2	-0.0392658	1 vs 2	0.617877	0.657143	Ttc17:ENSMUST00000055081.13, Ttc17:ENSMUST00000094801.4	Ttc17	NA	NA	FALSE	FALSE	0.471514	NA	FALSE
664	0.14242	0.346375	0.902124	0.921758	-0.019634	TRUE	-0.245425	2 vs 1	-0.0392681	2 vs 1	0.804247	0.843516	Nek4:ENSMUST00000226833.1, Nek4:ENSMUST00000228328.1	Nek4	NA	NA	FALSE	FALSE	0.346375	NA	FALSE
665	0.0807211	0.0286993	0.214044	0.233772	-0.0197279	FALSE	-0.113585	1 vs 2	-0.0394558	1 vs 2	-0.571912	-0.532456	Myef2:ENSMUST00000152367.7, Myef2:ENSMUST00000142718.7	Myef2	0.102736	0.0384967	FALSE	FALSE	0.0807211	0.107628	FALSE
666	0.00796715	9.93488e-05	0.804	0.824391	-0.0203914	FALSE	-0.134903	1 vs 2	-0.0407828	1 vs 2	0.608	0.648783	Zkscan3:ENSMUST00000070785.15, Zkscan3:ENSMUST00000117721.7	Zkscan3	0.01144	0.000173304	FALSE	FALSE	0.00796715	0.0120584	FALSE
667	0.165822	NA	0.0219966	0.0425532	-0.0205566	TRUE	-0.681109	1 vs 2	-0.0411132	1 vs 2	-0.956007	-0.914894	Saxo2:ENSMUST00000207693.1, Saxo2:ENSMUST00000126478.1	Saxo2	NA	NA	FALSE	FALSE	0.165822	NA	FALSE
668	5.66853e-05	0.000363187	0.891709	0.912538	-0.0208297	FALSE	-0.236715	2 vs 1	-0.0416594	2 vs 1	0.783417	0.825076	Tsnax:ENSMUST00000212603.1, Tsnax:ENSMUST00000075896.6	Tsnax	0.000103352	0.000598643	FALSE	FALSE	0.000363187	0.000638427	FALSE
669	0.146247	0.107899	0.812272	0.833133	-0.0208615	TRUE	-0.143159	1 vs 2	-0.041723	1 vs 2	0.624543	0.666267	Hip1:ENSMUST00000060311.11, Hip1:ENSMUST00000212301.1	Hip1	NA	NA	FALSE	FALSE	0.146247	NA	FALSE
670	0.37832	0.347765	0.62993	0.65082	-0.0208899	TRUE	-0.0907286	2 vs 1	-0.0417798	2 vs 1	0.25986	0.301639	Rabgap1:ENSMUST00000066055.9, Rabgap1:ENSMUST00000112920.1	Rabgap1	NA	NA	FALSE	FALSE	0.37832	NA	FALSE
671	0.494019	0.409599	0.142529	0.163462	-0.0209328	TRUE	-0.161749	2 vs 1	-0.0418656	2 vs 1	-0.714943	-0.673077	Tmem265:ENSMUST00000084563.10, Tmem265:ENSMUST00000190278.2	Tmem265	NA	NA	FALSE	FALSE	0.494019	NA	FALSE
672	0.343919	NA	0.91623	0.937272	-0.0210417	TRUE	-0.311969	2 vs 1	-0.0420834	2 vs 1	0.832461	0.874544	Gins3:ENSMUST00000212434.1, Gins3:ENSMUST00000034094.10	Gins3	NA	NA	FALSE	FALSE	0.343919	NA	FALSE
673	0.302311	0.90264	0.678685	0.700159	-0.0214744	TRUE	-0.100322	2 vs 1	-0.0429489	2 vs 1	0.35737	0.400319	Ikbip:ENSMUST00000020149.5, Ikbip:ENSMUST00000020150.9	Ikbip	NA	NA	FALSE	FALSE	0.90264	NA	FALSE
674	0.0410757	0.0572226	0.0547417	0.0762167	-0.021475	TRUE	-0.353935	2 vs 1	-0.04295	2 vs 1	-0.890517	-0.847567	Ccnc:ENSMUST00000065928.10, Ccnc:ENSMUST00000120679.7	Ccnc	NA	NA	FALSE	FALSE	0.0572226	NA	FALSE
675	1	NA	0.44	0.461538	-0.0215385	TRUE	-0.0870114	1 vs 2	-0.0430769	1 vs 2	-0.12	-0.0769231	Spats1:ENSMUST00000233769.1, Spats1:ENSMUST00000024731.8	Spats1	NA	NA	FALSE	FALSE	1	NA	FALSE
676	0.0361983	0.0699929	0.923504	0.945128	-0.0216237	FALSE	-0.355375	2 vs 1	-0.0432474	2 vs 1	0.847008	0.890255	Zfp280d:ENSMUST00000184517.7, Zfp280d:ENSMUST00000183410.7	Zfp280d	0.0489301	0.0892697	FALSE	FALSE	0.0699929	0.0939631	FALSE
677	0.0147984	0.000132578	0.795049	0.816775	-0.0217262	FALSE	-0.139017	2 vs 1	-0.0434524	2 vs 1	0.590098	0.63355	Patz1:ENSMUST00000094471.9, Patz1:ENSMUST00000134089.7	Patz1	0.0207178	0.000228198	FALSE	FALSE	0.0147984	0.0213271	FALSE
678	0.00343894	0.00890098	0.845212	0.867094	-0.0218823	FALSE	-0.177977	2 vs 1	-0.0437646	2 vs 1	0.690423	0.734188	Qrich1:ENSMUST00000193258.5, Qrich1:ENSMUST00000006851.14	Qrich1	0.00508704	0.0125908	FALSE	FALSE	0.00890098	0.0134199	FALSE
679	0.164417	0.241334	0.539174	0.561069	-0.0218946	FALSE	-0.0884824	2 vs 1	-0.0437893	2 vs 1	0.0783481	0.122137	Rabep1:ENSMUST00000179114.7, Rabep1:ENSMUST00000100928.10	Rabep1	0.19954	0.276929	FALSE	FALSE	0.241334	0.294739	FALSE
680	2.32955e-07	1.18821e-06	0.89231	0.914455	-0.0221449	FALSE	-0.254728	1 vs 2	-0.0442898	1 vs 2	0.784621	0.828911	Ssr3:ENSMUST00000029414.11, Ssr3:ENSMUST00000119896.1	Ssr3	4.78107e-07	2.32268e-06	FALSE	FALSE	1.18821e-06	2.38861e-06	FALSE
681	0.939754	NA	0.906306	0.928571	-0.0222651	TRUE	-0.295603	2 vs 1	-0.0445302	2 vs 1	0.812613	0.857143	Nfe2l3:ENSMUST00000160133.1, Nfe2l3:ENSMUST00000005103.11	Nfe2l3	NA	NA	FALSE	FALSE	0.939754	NA	FALSE
682	0.206503	0.180123	0.809149	0.831461	-0.0223116	FALSE	-0.151525	2 vs 1	-0.0446233	2 vs 1	0.618298	0.662921	Ube3c:ENSMUST00000199032.1, Ube3c:ENSMUST00000049453.8	Ube3c	0.24755	0.210414	FALSE	FALSE	0.206503	0.254557	FALSE
683	0.0030999	0.00547169	0.931677	0.953998	-0.0223208	FALSE	-0.419232	2 vs 1	-0.0446416	2 vs 1	0.863354	0.907996	Supt20:ENSMUST00000170552.5, Supt20:ENSMUST00000200441.4	Supt20	0.00463802	0.00788329	FALSE	FALSE	0.00547169	0.00837853	FALSE
684	0.538599	NA	0.861478	0.883871	-0.0223934	TRUE	-0.201992	1 vs 2	-0.0447868	1 vs 2	0.722955	0.767742	Zfp773:ENSMUST00000211240.1, Zfp773:ENSMUST00000032622.8	Zfp773	NA	NA	FALSE	FALSE	0.538599	NA	FALSE
685	0.135732	NA	0.950397	0.972826	-0.0224293	TRUE	-0.625123	2 vs 1	-0.0448585	2 vs 1	0.900794	0.945652	1600014C10Rik:ENSMUST00000177983.1, 1600014C10Rik:ENSMUST00000178207.7	1600014C10Rik	NA	NA	FALSE	FALSE	0.135732	NA	FALSE
686	0.682511	NA	0.945455	0.968326	-0.0228712	TRUE	-0.567434	1 vs 2	-0.0457425	1 vs 2	0.890909	0.936652	Palb2:ENSMUST00000106469.7, Palb2:ENSMUST00000106468.6	Palb2	NA	NA	FALSE	FALSE	0.682511	NA	FALSE
687	5.89317e-18	4.36662e-16	0.928817	0.951819	-0.0230025	FALSE	-0.41476	2 vs 1	-0.046005	2 vs 1	0.857633	0.903638	Ivns1abp:ENSMUST00000111887.9, Ivns1abp:ENSMUST00000023918.12	Ivns1abp	1.73693e-17	1.2133e-15	FALSE	FALSE	4.36662e-16	1.24943e-15	FALSE
688	1	NA	0.909091	0.932292	-0.0232008	TRUE	-0.319851	1 vs 2	-0.0464015	1 vs 2	0.818182	0.864583	Plch1:ENSMUST00000162269.8, Plch1:ENSMUST00000161052.2	Plch1	NA	NA	FALSE	FALSE	1	NA	FALSE
689	0.033804	0.077113	0.926158	0.949517	-0.0233597	TRUE	-0.405213	1 vs 2	-0.0467195	1 vs 2	0.852315	0.899035	Gtpbp10:ENSMUST00000115441.8, Gtpbp10:ENSMUST00000198799.1	Gtpbp10	NA	NA	FALSE	FALSE	0.077113	NA	FALSE
690	5.06238e-21	4.10038e-19	0.944415	0.968019	-0.023604	FALSE	-0.577463	2 vs 1	-0.0472081	2 vs 1	0.888831	0.936039	Ssbp1:ENSMUST00000031971.12, Ssbp1:ENSMUST00000114779.8	Ssbp1	1.64004e-20	1.25594e-18	FALSE	FALSE	4.10038e-19	1.29625e-18	FALSE
691	0.0461553	NA	0.955651	0.97973	-0.0240788	TRUE	-0.80782	1 vs 2	-0.0481576	1 vs 2	0.911302	0.959459	Ltn1:ENSMUST00000039449.8, Ltn1:ENSMUST00000232095.1	Ltn1	NA	NA	FALSE	FALSE	0.0461553	NA	FALSE
692	0.146162	0.0734499	0.327404	0.35164	-0.0242363	FALSE	-0.108113	1 vs 2	-0.0484727	1 vs 2	-0.345193	-0.29672	Cwc25:ENSMUST00000018685.8, Cwc25:ENSMUST00000107579.1	Cwc25	0.17961	0.0933726	FALSE	FALSE	0.146162	0.186025	FALSE
693	0.79802	0.588304	0.604789	0.629032	-0.0242436	TRUE	-0.102609	2 vs 1	-0.0484872	2 vs 1	0.209577	0.258065	Nrp2:ENSMUST00000114155.7, Nrp2:ENSMUST00000102822.8	Nrp2	NA	NA	FALSE	FALSE	0.79802	NA	FALSE
694	0.0575826	0.116587	0.725573	0.750294	-0.0247205	FALSE	-0.127902	2 vs 1	-0.049441	2 vs 1	0.451147	0.500588	Ldah:ENSMUST00000218086.1, Ldah:ENSMUST00000169104.2	Ldah	0.0755588	0.142171	FALSE	FALSE	0.116587	0.151834	FALSE
695	2.2037e-11	1.82876e-17	0.586693	0.60027	-0.0135771	FALSE	-1.62119	4 vs 2	-0.0496119	4 vs 2	-0.0923277	-0.0427158	Dcaf17:ENSMUST00000112159.8, Dcaf17:ENSMUST00000102701.4, Dcaf17:ENSMUST00000154704.7, Dcaf17:ENSMUST00000064141.11	Dcaf17	5.20391e-11	5.43045e-17	FALSE	FALSE	2.2037e-11	5.36552e-11	FALSE
696	5.53107e-05	0.000344893	0.916523	0.941381	-0.0248573	FALSE	-0.380261	1 vs 2	-0.0497145	1 vs 2	0.833046	0.882761	Cenps:ENSMUST00000177408.1, Cenps:ENSMUST00000105695.1	Cenps	0.000101317	0.000570909	FALSE	FALSE	0.000344893	0.000609001	FALSE
697	0.00504723	0.0125946	0.936901	0.961853	-0.0249515	FALSE	-0.529531	1 vs 2	-0.0499029	1 vs 2	0.873803	0.923706	Brd4:ENSMUST00000003726.15, Brd4:ENSMUST00000120276.8	Brd4	0.00738251	0.0173734	FALSE	FALSE	0.0125946	0.0184219	FALSE
698	1.79651e-07	1.17638e-06	0.766165	0.791664	-0.0254993	FALSE	-0.148205	1 vs 2	-0.0509985	1 vs 2	0.53233	0.583328	Rexo2:ENSMUST00000034524.4, Rexo2:ENSMUST00000217037.1	Rexo2	3.7261e-07	2.31118e-06	FALSE	FALSE	1.17638e-06	2.37702e-06	FALSE
699	4.18874e-17	2.45419e-16	0.758186	0.783798	-0.0256117	FALSE	-0.145176	1 vs 2	-0.0512233	1 vs 2	0.516373	0.567596	Pafah1b3:ENSMUST00000108410.7, Pafah1b3:ENSMUST00000155118.1	Pafah1b3	1.17285e-16	6.91798e-16	FALSE	FALSE	2.45419e-16	7.12625e-16	FALSE
700	0.121126	0.252826	0.460961	0.474181	-0.0132204	TRUE	-0.362372	3 vs 2	-0.051955	3 vs 2	-0.720721	-0.668766	Clip4:ENSMUST00000229952.1, Clip4:ENSMUST00000024854.8, Clip4:ENSMUST00000229874.1	Clip4	NA	NA	FALSE	FALSE	0.252826	NA	FALSE
701	0.589134	0.435206	0.166817	0.193548	-0.0267317	TRUE	-0.181242	2 vs 1	-0.0534634	2 vs 1	-0.666367	-0.612903	Syn2:ENSMUST00000169345.3, Syn2:ENSMUST00000009538.11	Syn2	NA	NA	FALSE	FALSE	0.589134	NA	FALSE
702	0.0112047	0.134087	0.917355	0.944215	-0.0268595	FALSE	-0.421901	2 vs 1	-0.053719	2 vs 1	0.834711	0.88843	Dym:ENSMUST00000236220.1, Dym:ENSMUST00000039608.8	Dym	0.0157995	0.161485	FALSE	FALSE	0.134087	0.173472	FALSE
703	0.17059	0.0425703	0.513927	0.541073	-0.0271464	TRUE	-0.108942	1 vs 2	-0.0542927	1 vs 2	0.0278541	0.0821468	Iqcc:ENSMUST00000046675.11, Iqcc:ENSMUST00000121442.1	Iqcc	NA	NA	FALSE	FALSE	0.17059	NA	FALSE
704	0.00114306	0.000824309	0.117855	0.145004	-0.0271491	FALSE	-0.238567	2 vs 1	-0.0542983	2 vs 1	-0.76429	-0.709992	Gm6710:ENSMUST00000109011.7, Gm6710:ENSMUST00000109012.3	Gm6710	0.00175717	0.00130808	FALSE	FALSE	0.00114306	0.00185156	FALSE
705	6.10388e-07	6.11908e-07	0.924245	0.951894	-0.0276488	FALSE	-0.483572	2 vs 1	-0.0552975	2 vs 1	0.848491	0.903788	Coa8:ENSMUST00000162316.1, Coa8:ENSMUST00000040519.11	Coa8	1.22078e-06	1.21449e-06	FALSE	FALSE	6.11908e-07	1.2559e-06	FALSE
706	0.0634102	0.0333609	0.864346	0.892126	-0.0277802	TRUE	-0.26078	2 vs 1	-0.0555605	2 vs 1	0.728691	0.784252	Armt1:ENSMUST00000117489.7, Armt1:ENSMUST00000118544.7	Armt1	NA	NA	FALSE	FALSE	0.0634102	NA	FALSE
707	0.063852	0.0034743	0.824986	0.85343	-0.0284447	FALSE	-0.211265	1 vs 2	-0.0568895	1 vs 2	0.649971	0.706861	Rprd2:ENSMUST00000090791.7, Rprd2:ENSMUST00000197449.1	Rprd2	0.0821834	0.0051	FALSE	FALSE	0.063852	0.0866089	FALSE
708	0.0270366	0.104674	0.779992	0.808548	-0.0285558	FALSE	-0.174982	2 vs 1	-0.0571116	2 vs 1	0.559984	0.617096	Trp53rkb:ENSMUST00000065753.1, Trp53rkb:ENSMUST00000151826.1	Trp53rkb	0.036928	0.12832	FALSE	FALSE	0.104674	0.137068	FALSE
709	7.49147e-11	5.45436e-10	0.655047	0.684117	-0.0290694	FALSE	-0.131455	2 vs 1	-0.0581388	2 vs 1	0.310094	0.368233	Ssu72:ENSMUST00000105595.1, Ssu72:ENSMUST00000030905.8	Ssu72	1.74801e-10	1.24809e-09	FALSE	FALSE	5.45436e-10	1.28802e-09	FALSE
710	0.426163	0.55905	0.926471	0.955556	-0.029085	TRUE	-0.534356	2 vs 1	-0.0581699	2 vs 1	0.852941	0.911111	Chodl:ENSMUST00000114216.1, Chodl:ENSMUST00000023568.13	Chodl	NA	NA	FALSE	FALSE	0.55905	NA	FALSE
711	1	NA	0.220833	0.25	-0.0291667	TRUE	-0.162204	2 vs 1	-0.0583333	2 vs 1	-0.558333	-0.5	Pigz:ENSMUST00000134666.2, Pigz:ENSMUST00000052174.2	Pigz	NA	NA	FALSE	FALSE	1	NA	FALSE
712	0.000174487	0.000187626	0.887161	0.914454	-0.0272927	FALSE	-0.560891	3 vs 1	-0.0585029	3 vs 2	0.674388	0.732891	Fto:ENSMUST00000125471.7, Fto:ENSMUST00000128081.7, Fto:ENSMUST00000069718.14	Fto	0.00030265	0.000318718	FALSE	FALSE	0.000187626	0.000338937	FALSE
713	5.89626e-06	1.64138e-07	0.91421	0.943815	-0.029605	FALSE	-1.04504	2 vs 1	-0.05921	3 vs 1	0.828421	0.887631	Trak1:ENSMUST00000211439.1, Trak1:ENSMUST00000211187.1, Trak1:ENSMUST00000210798.2	Trak1	1.13859e-05	3.41441e-07	FALSE	FALSE	5.89626e-06	1.16147e-05	FALSE
714	0.000101286	0.000188984	0.908559	0.93826	-0.0297009	FALSE	-0.424929	1 vs 2	-0.0594019	1 vs 2	0.817118	0.87652	Srpk1:ENSMUST00000130643.8, Srpk1:ENSMUST00000114767.2	Srpk1	0.000178046	0.000319629	FALSE	FALSE	0.000188984	0.000339824	FALSE
715	0.0250127	0.123882	0.87858	0.908287	-0.0297077	FALSE	-0.313852	1 vs 2	-0.0594154	1 vs 2	0.757159	0.816575	Rap1gds1:ENSMUST00000098574.8, Rap1gds1:ENSMUST00000200396.1	Rap1gds1	0.0345246	0.150595	FALSE	FALSE	0.123882	0.160801	FALSE
716	0.246669	NA	0.95136	0.981132	-0.0297718	TRUE	-0.977792	1 vs 2	-0.0595436	1 vs 2	0.902721	0.962264	Adam22:ENSMUST00000088761.10, Adam22:ENSMUST00000115385.1	Adam22	NA	NA	FALSE	FALSE	0.246669	NA	FALSE
717	0.289957	0.238406	0.0788177	0.10883	-0.0300118	TRUE	-0.355767	2 vs 1	-0.0600237	2 vs 1	-0.842365	-0.782341	Zic3:ENSMUST00000088627.10, Zic3:ENSMUST00000088629.3	Zic3	NA	NA	FALSE	FALSE	0.289957	NA	FALSE
718	0.153906	0.342516	0.586942	0.617257	-0.0303146	TRUE	-0.126582	1 vs 2	-0.0606292	1 vs 2	0.173884	0.234513	Slc11a2:ENSMUST00000023774.11, Slc11a2:ENSMUST00000138843.7	Slc11a2	NA	NA	FALSE	FALSE	0.342516	NA	FALSE
719	0.0572676	NA	0.916792	0.947236	-0.0304446	TRUE	-0.488191	2 vs 1	-0.0608892	2 vs 1	0.833583	0.894472	Purg:ENSMUST00000070340.5, Purg:ENSMUST00000078058.4	Purg	NA	NA	FALSE	FALSE	0.0572676	NA	FALSE
720	0.0261264	0.0632074	0.376801	0.40729	-0.030489	FALSE	-0.127969	2 vs 1	-0.0609781	2 vs 1	-0.246398	-0.18542	Arid4b:ENSMUST00000110533.1, Arid4b:ENSMUST00000039538.14	Arid4b	0.0358096	0.0819589	FALSE	FALSE	0.0632074	0.0860322	FALSE
721	0.0208196	0.0650793	0.743573	0.774733	-0.0311594	TRUE	-0.170606	1 vs 2	-0.0623187	1 vs 2	0.487147	0.549465	9430038I01Rik:ENSMUST00000117404.7, 9430038I01Rik:ENSMUST00000120340.1	9430038I01Rik	NA	NA	FALSE	FALSE	0.0650793	NA	FALSE
722	0.222295	0.00243329	0.507576	0.538889	-0.0313131	TRUE	-0.125565	1 vs 2	-0.0626263	1 vs 2	0.0151515	0.0777778	D5Ertd579e:ENSMUST00000031091.12, D5Ertd579e:ENSMUST00000140653.1	D5Ertd579e	NA	NA	FALSE	FALSE	0.222295	NA	FALSE
723	0.000539301	0.00289316	0.894959	0.926797	-0.0318381	FALSE	-0.396074	2 vs 1	-0.0636763	2 vs 1	0.789919	0.853595	2510002D24Rik:ENSMUST00000123146.7, 2510002D24Rik:ENSMUST00000055413.12	2510002D24Rik	0.000869984	0.00431203	FALSE	FALSE	0.00289316	0.00451841	FALSE
724	0.00080297	0.0139706	0.903185	0.935185	-0.0319999	FALSE	-0.436082	2 vs 1	-0.0639999	2 vs 1	0.80637	0.87037	Wdr48:ENSMUST00000217472.1, Wdr48:ENSMUST00000215307.1	Wdr48	0.00126411	0.0191357	FALSE	FALSE	0.0139706	0.0202083	FALSE
725	9.61335e-35	8.91485e-34	0.687299	0.719616	-0.0323167	FALSE	-0.155034	2 vs 1	-0.0646334	2 vs 1	0.374598	0.439232	Pomp:ENSMUST00000201120.1, Pomp:ENSMUST00000031654.9	Pomp	4.05208e-34	3.85319e-33	FALSE	FALSE	8.91485e-34	4.0168e-33	FALSE
726	2.21284e-09	2.48472e-09	0.928799	0.961249	-0.0324501	FALSE	-0.642689	1 vs 2	-0.0649002	1 vs 2	0.857597	0.922497	Gmcl1:ENSMUST00000001185.13, Gmcl1:ENSMUST00000113679.1	Gmcl1	4.92859e-09	5.46076e-09	FALSE	FALSE	2.48472e-09	5.63011e-09	FALSE
727	0.000758061	3.42219e-08	0.639459	0.672013	-0.0325536	FALSE	-0.144285	1 vs 2	-0.0651073	1 vs 2	0.278918	0.344026	Gart:ENSMUST00000023684.13, Gart:ENSMUST00000231380.1	Gart	0.00120308	7.27449e-08	FALSE	FALSE	0.000758061	0.00126451	FALSE
728	1	NA	0.9	0.932692	-0.0326923	TRUE	-0.431576	1 vs 2	-0.0653846	1 vs 2	0.8	0.865385	Dtx3l:ENSMUST00000081933.13, Dtx3l:ENSMUST00000114885.2	Dtx3l	NA	NA	FALSE	FALSE	1	NA	FALSE
729	3.23492e-06	8.44784e-06	0.928067	0.960971	-0.0329039	FALSE	-0.646268	2 vs 1	-0.0658078	2 vs 1	0.856134	0.921942	Dele1:ENSMUST00000236078.1, Dele1:ENSMUST00000025314.6	Dele1	6.3089e-06	1.61882e-05	FALSE	FALSE	8.44784e-06	1.65578e-05	FALSE
730	0.652642	NA	0.0638298	0.0967742	-0.0329444	TRUE	-0.451985	1 vs 2	-0.0658888	1 vs 2	-0.87234	-0.806452	Filip1:ENSMUST00000239133.1, Filip1:ENSMUST00000093811.10	Filip1	NA	NA	FALSE	FALSE	0.652642	NA	FALSE
731	0.00031349	0.0106365	0.935004	0.968095	-0.0330909	TRUE	-0.746337	2 vs 1	-0.0661818	2 vs 1	0.870008	0.93619	Lig3:ENSMUST00000131537.8, Lig3:ENSMUST00000021039.11	Lig3	NA	NA	FALSE	FALSE	0.0106365	NA	FALSE
732	1	NA	0.966667	1	-0.0333333	TRUE	#NAME?	1 vs 2	-0.0666667	1 vs 2	0.933333	1	Ldb3:ENSMUST00000022327.12, Ldb3:ENSMUST00000227819.1	Ldb3	NA	NA	FALSE	FALSE	1	NA	FALSE
733	1.23185e-36	4.12454e-32	0.914739	0.948513	-0.0337743	FALSE	-0.540651	1 vs 2	-0.0675487	1 vs 2	0.829478	0.897027	Hnrnph3:ENSMUST00000020263.13, Hnrnph3:ENSMUST00000119814.2	Hnrnph3	5.61493e-36	1.68889e-31	FALSE	FALSE	4.12454e-32	1.75741e-31	FALSE
[truncated: 380 more rows]

## Sheet: cor_glu.vs.fb_gaba
	pval.chisq	pval.DM	warm.base	warm.alt	delta.warm	low.pct.flag	max.log.or	max.abs.log.or.id	max.prpchg	max.abs.prpchg.id	prp.dif.base	prp.dif.alt	trans	gene	pval.chisq.adj	pval.DM.adj	sig.chisq	sig.DM	pval.inter	pval.adj	sig
[truncated: 1,119 more rows]

[truncated: 6 more sheets: dorsal_nb.vs.fb_nb, dorsal_rgc.vs.dorsal_nb, dorsal_rgc.vs.fb_rgc, fb_gaba.vs.fb_nb, fb_gaba.vs.fb_rgc, fb_rgc.vs.fb_nb]
