# Supplementary material for: Infernape uncovers cell type–specific and spatially resolved alternative polyadenylation in the brain
Source: HighWire-hosted journal article supplement (doi:10.1101/gr.277864.123), 2023-10-01
Supplement: Supplemental_Tables.zip [file Supplemental_Table_S9.xlsx]

## Sheet: utr
Within-UTR level WARM values for each cell-type in developing mouse brain dataset
	Dorsal_GLU	Dorsal_IPC	Dorsal_RGC	Ventral_GAB	Ventral_NB	Ventral_RGC
Serpini1:ENSMUST00000029423.8	0.624905	0.329315	0.230415	0.631598	0.398671	0.233645
Trim37:ENSMUST00000041282.12	0.407965	0.115044	0.0771528	0.258545	0.117647	0.106918
Nolc1:ENSMUST00000223728.1	0.470535	0.196286	0.188402	0.43646	0.211601	0.171471
Hspa4:ENSMUST00000020630.7	0.566272	0.306573	0.302803	0.518553	0.315412	0.295635
Anp32e:ENSMUST00000165307.7	0.510212	0.257455	0.238678	0.455517	0.293621	0.244392
Seh1l:ENSMUST00000025421.8	0.86566	0.543595	0.414712	0.818005	0.536188	0.361556
Cilk1:ENSMUST00000044551.7	0.410273	0.169072	0.148193	0.366417	0.211986	0.155377
Tomm70a:ENSMUST00000166897.2	0.340591	0.232564	0.224563	0.302244	0.215557	0.199128
Cyb5b:ENSMUST00000034400.4	0.633461	0.391834	0.34145	0.559334	0.408196	0.309413
Azin1:ENSMUST00000065308.12	0.742558	0.501403	0.492333	0.697399	0.506764	0.518342
Ensa:ENSMUST00000058230.12	0.120259	0.0956061	0.11371	0.122257	0.105886	0.0997695
Rfxap:ENSMUST00000044373.5	0.33918	0.113936	0.218315	0.251735	0.081381	0.190563
Gnb1:ENSMUST00000165335.7	0.724091	0.501077	0.397151	0.710557	0.49869	0.389152
Dcaf7:ENSMUST00000058438.8	0.932283	0.712658	0.676856	0.881206	0.782979	0.680402
Scarb2:ENSMUST00000031377.8	0.447858	0.238193	0.325566	0.396979	0.28858	0.314324
Nars:ENSMUST00000237400.1	0.647721	0.441836	0.412629	0.596037	0.429919	0.345835
Itfg1:ENSMUST00000034140.8	0.627114	0.388308	0.337195	0.58488	0.410507	0.352877
Cdc26:ENSMUST00000084525.11	0.481944	0.278133	0.17482	0.485689	0.258401	0.169285
Neo1:ENSMUST00000068664.6	0.596076	0.395319	0.390957	0.602941	0.410714	0.385312
Tmed10:ENSMUST00000040766.8	0.287026	0.191475	0.182414	0.254051	0.200874	0.178939
Ubqln1:ENSMUST00000058735.11	0.51269	0.3168	0.337954	0.485762	0.346943	0.344188
Dynll2:ENSMUST00000178105.2	0.598051	0.402789	0.272335	0.547238	0.38641	0.262648
Chchd5:ENSMUST00000035481.4	0.620409	0.425287	0.447715	0.582437	0.4677	0.48244
Nedd4l:ENSMUST00000163516.8	0.368976	0.178156	0.163817	0.401259	0.208103	0.151403
Erp44:ENSMUST00000030028.4	0.384852	0.194086	0.17161	0.35762	0.196213	0.17912
Actr3b:ENSMUST00000128727.7	0.890606	0.701686	0.733696	0.856423	0.753086	0.745989
Rexo2:ENSMUST00000217037.1	0.339893	0.152968	0.116894	0.344062	0.143777	0.117568
Sh3glb1:ENSMUST00000198254.4	0.337839	0.181612	0.158619	0.310828	0.206858	0.160045
Bclaf1:ENSMUST00000092678.9	0.492685	0.313473	0.293279	0.4657	0.312521	0.276948
Btbd1:ENSMUST00000026093.8	0.677329	0.498782	0.508102	0.651554	0.520311	0.499586
Rab2a:ENSMUST00000060232.7	0.814167	0.636584	0.586941	0.804363	0.632092	0.583999
Reep5:ENSMUST00000006027.6	0.296665	0.119346	0.111611	0.319234	0.137395	0.128387
H2bc4:ENSMUST00000018246.5	0.627369	0.450878	0.39058	0.588725	0.370145	0.415257
Mmd:ENSMUST00000004050.6	0.874491	0.78178	0.770644	0.875646	0.786477	0.763639
Tent2:ENSMUST00000225868.1	0.567576	0.392353	0.461598	0.565986	0.477182	0.404518
Tmem33:ENSMUST00000037918.11	0.393528	0.238339	0.223877	0.366273	0.253619	0.234315
Arpp19:ENSMUST00000169492.7	0.316775	0.182819	0.15684	0.287333	0.166123	0.151896
Ppp1r2:ENSMUST00000060188.13	0.497003	0.326316	0.296848	0.48899	0.320471	0.314131
Parp1:ENSMUST00000027777.11	0.671062	0.50138	0.468297	0.659642	0.509115	0.467871
Ess2:ENSMUST00000232423.1	0.423792	0.25548	0.25213	0.387431	0.274244	0.247531
Slc39a3:ENSMUST00000117276.10	0.802089	0.634483	0.630297	0.744099	0.624194	0.569697
Ipo9:ENSMUST00000041023.13	0.462805	0.297049	0.261827	0.385144	0.320366	0.269283
Pdhx:ENSMUST00000011058.8	0.561766	0.398223	0.447645	0.531271	0.384279	0.421275
Pnisr:ENSMUST00000108229.1	0.67237	0.578598	0.465754	0.669962	0.672184	0.467116
Leprotl1:ENSMUST00000033910.8	0.522378	0.34455	0.282887	0.495139	0.365046	0.215525
Ppp4r2:ENSMUST00000063854.6	0.302038	0.14647	0.121938	0.257696	0.106179	0.122136
Usp47:ENSMUST00000210309.1	0.784543	0.623591	0.575812	0.776762	0.641975	0.655995
Gng2:ENSMUST00000160013.7	0.278276	0.182394	0.186157	0.25829	0.205464	0.150288
Map1lc3b:ENSMUST00000034270.16	0.773739	0.613238	0.556069	0.751019	0.59586	0.524807
Ube2j1:ENSMUST00000124992.7	0.394408	0.232965	0.241517	0.378493	0.228035	0.187233
Rgmb:ENSMUST00000170578.2	0.353707	0.237356	0.229809	0.313717	0.223577	0.219127
Luc7l2:ENSMUST00000161538.7	0.597673	0.446311	0.400152	0.564503	0.415108	0.345864
Coa7:ENSMUST00000131656.1	0.246089	0.151184	0.168428	0.230046	0.201237	0.154051
Pmpca:ENSMUST00000076431.12	0.554175	0.397141	0.328331	0.482763	0.385303	0.337371
Hsbp1:ENSMUST00000034300.7	0.500593	0.343499	0.347339	0.47636	0.322077	0.332399
Cd2bp2:ENSMUST00000166791.7	0.57583	0.423401	0.442844	0.570311	0.438073	0.379631
Csnk1d:ENSMUST00000070575.13	0.832631	0.677171	0.58852	0.80053	0.646697	0.444983
Lman2:ENSMUST00000021940.7	0.389859	0.237761	0.197517	0.355727	0.230447	0.172415
Chmp3:ENSMUST00000059462.11	0.483305	0.329835	0.358974	0.490772	0.346801	0.391304
Dnajc11:ENSMUST00000062904.10	0.517023	0.363572	0.279352	0.497895	0.336457	0.259249
Rtn3:ENSMUST00000088169.6	0.658174	0.551774	0.543179	0.636715	0.553708	0.532001
Atg4b:ENSMUST00000027502.15	0.427259	0.274693	0.247545	0.434576	0.300877	0.251587
Tbpl1:ENSMUST00000127698.7	0.401089	0.248937	0.236098	0.333438	0.219939	0.2008
Wbp4:ENSMUST00000022601.6	0.35601	0.27679	0.266237	0.348767	0.293619	0.263387
Gspt1:ENSMUST00000167571.7	0.292659	0.100348	0.0866957	0.227144	0.113769	0.104811
Cyrib:ENSMUST00000063838.10	0.193515	0.0419892	0.0495183	0.146165	0.0419821	0.0349957
Pspc1:ENSMUST00000022507.12	0.723444	0.572058	0.560818	0.701073	0.592233	0.554853
Sms:ENSMUST00000112529.7	0.332781	0.242193	0.245247	0.318286	0.252627	0.24263
Prkar1a:ENSMUST00000106677.7	0.606733	0.460263	0.401131	0.665353	0.496136	0.442794
Cnot11:ENSMUST00000161515.7	0.310328	0.159942	0.170421	0.193565	0.154834	0.111837
Pafah1b1:ENSMUST00000021091.14	0.448381	0.240526	0.212505	0.385407	0.248037	0.21746
Armcx3:ENSMUST00000086884.4	0.388986	0.240924	0.267477	0.305985	0.246634	0.257081
Cd47:ENSMUST00000229101.1	0.175245	0.138076	0.115866	0.165966	0.143569	0.121702
Chtop:ENSMUST00000107343.7	0.854997	0.707283	0.699308	0.847887	0.71015	0.713701
Ppp2cb:ENSMUST00000009774.10	0.838086	0.691057	0.69671	0.809726	0.759036	0.83513
Ranbp1:ENSMUST00000115645.9	0.710163	0.563899	0.424016	0.736165	0.648833	0.577602
Srsf7:ENSMUST00000063417.10	0.358033	0.211857	0.225211	0.350264	0.199509	0.190653
Gnl1:ENSMUST00000087200.3	0.259964	0.115424	0.133709	0.267218	0.134801	0.131533
Mcl1:ENSMUST00000037947.14	0.749235	0.657019	0.693738	0.711364	0.639376	0.607897
Rab11a:ENSMUST00000169058.7	0.432799	0.288563	0.326183	0.403591	0.330455	0.299786
Mapre2:ENSMUST00000170802.7	0.333491	0.1893	0.132986	0.288385	0.20122	0.113346
Tbc1d19:ENSMUST00000037337.9	0.445653	0.341477	0.276341	0.462556	0.46387	0.378132
Micu2:ENSMUST00000022543.9	0.486581	0.343313	0.308722	0.425592	0.314255	0.343547
Mob4:ENSMUST00000162364.7	0.450424	0.312817	0.31937	0.398822	0.302659	0.334273
Rnf121:ENSMUST00000096639.11	0.917041	0.774572	0.784343	0.919	0.831874	0.773182
Lix1l:ENSMUST00000062058.4	0.624275	0.482543	0.453134	0.613982	0.483276	0.440932
Nif3l1:ENSMUST00000087521.12	0.519643	0.378483	0.33848	0.54107	0.364407	0.310757
Ccdc47:ENSMUST00000002043.9	0.681019	0.567356	0.634451	0.665678	0.580832	0.637385
Sipa1l1:ENSMUST00000222298.1	0.274341	0.134191	0.113338	0.234295	0.127877	0.107994
Atp6v1c1:ENSMUST00000022904.7	0.649728	0.505388	0.363976	0.672317	0.573141	0.41281
Rab3c:ENSMUST00000167824.2	0.221	0.100374	0.0847522	0.227436	0.112076	0.0548182
Rprd1a:ENSMUST00000046206.4	0.855717	0.716834	0.726531	0.819039	0.748844	0.736649
Cdc42:ENSMUST00000030417.9	0.45095	0.31294	0.324906	0.425628	0.302361	0.335329
Ndufaf4:ENSMUST00000029925.9	0.563882	0.426182	0.439105	0.527363	0.431507	0.478316
Tial1:ENSMUST00000106226.8	0.215951	0.079031	0.0792727	0.195221	0.0754541	0.0738408
Arxes1:ENSMUST00000057625.2	0.789377	0.652473	0.660936	0.781275	0.655031	0.678867
D430019H16Rik:ENSMUST00000178224.1	0.888009	0.733575	0.746076	0.850252	0.722031	0.638904
Znrf1:ENSMUST00000171182.7	0.168696	0.103602	0.0897031	0.14291	0.096769	0.070293
Srp9:ENSMUST00000027792.5	0.475733	0.340336	0.338718	0.535953	0.350313	0.39113
Dnaja1:ENSMUST00000164233.7	0.376233	0.241109	0.202651	0.380633	0.254903	0.179189
Gdap1l1:ENSMUST00000109420.9	0.281096	0.172022	0.169871	0.286285	0.20846	0.143429
Fam168b:ENSMUST00000167518.7	0.780493	0.640673	0.63344	0.749741	0.617649	0.598549
Aasdhppt:ENSMUST00000051589.8	0.331533	0.260568	0.249481	0.333577	0.270375	0.238126
Ube4b:ENSMUST00000103212.9	0.674918	0.540786	0.500962	0.627821	0.548396	0.552344
Mkrn1:ENSMUST00000114823.7	0.765465	0.634236	0.566467	0.747227	0.587144	0.501701
Exoc3:ENSMUST00000035934.6	0.257443	0.132531	0.142716	0.230971	0.148147	0.134484
1500009L16Rik:ENSMUST00000150459.2	0.538505	0.407407	0.314248	0.573871	0.424716	0.325639
Pitpnb:ENSMUST00000086635.8	0.778179	0.699934	0.652835	0.764561	0.672109	0.610609
Sar1a:ENSMUST00000020285.9	0.845669	0.715447	0.734894	0.823687	0.732502	0.716646
Uri1:ENSMUST00000085513.5	0.572779	0.509411	0.506514	0.569821	0.531541	0.534688
Dazap1:ENSMUST00000105362.7	0.620465	0.477391	0.431169	0.635939	0.554227	0.542191
Pno1:ENSMUST00000020317.7	0.685565	0.555556	0.524795	0.687843	0.600939	0.529668
Spin1:ENSMUST00000095797.5	0.633337	0.49243	0.481383	0.579134	0.45041	0.451053
Bri3bp:ENSMUST00000049040.13	0.269222	0.17178	0.157614	0.236571	0.181469	0.143323
Bend5:ENSMUST00000030274.6	0.198691	0.0695971	0.0827225	0.185144	0.105882	0.0367776
Fip1l1:ENSMUST00000113536.7	0.253128	0.124409	0.105707	0.21378	0.125162	0.124018
2810004N23Rik:ENSMUST00000034465.8	0.313163	0.184504	0.134682	0.289827	0.217561	0.0962887
Lsm14a:ENSMUST00000085585.11	0.71257	0.581438	0.580282	0.675097	0.567653	0.578033
Rbx1:ENSMUST00000023036.6	0.409489	0.283791	0.245826	0.354474	0.241998	0.222096
Zc2hc1a:ENSMUST00000051064.8	0.4808	0.39346	0.354471	0.479577	0.377794	0.332471
Poc5:ENSMUST00000099295.5	0.281838	0.168889	0.172921	0.235186	0.173344	0.157978
Cxadr:ENSMUST00000023572.14	0.577121	0.457258	0.47528	0.537295	0.490497	0.461074
Erich1:ENSMUST00000110813.4	0.217256	0.0911901	0.109541	0.184855	0.0956072	0.106618
2410004B18Rik:ENSMUST00000039571.13	0.319365	0.193391	0.219729	0.26781	0.191923	0.187958
Mdga1:ENSMUST00000171691.8	0.833403	0.707537	0.534483	0.77665	0.48913	0.432258
Gtf2f2:ENSMUST00000088922.4	0.76897	0.645282	0.63587	0.799353	0.699613	0.550346
Eloc:ENSMUST00000188641.6	0.456494	0.322245	0.291426	0.47738	0.369208	0.327258
Golt1b:ENSMUST00000032372.6	0.51089	0.387215	0.319344	0.477519	0.402293	0.355331
Vamp2:ENSMUST00000117780.1	0.84262	0.7174	0.813463	0.780371	0.73997	0.791864
Fam207a:ENSMUST00000045454.8	0.625665	0.500802	0.50454	0.629709	0.501999	0.484409
Cadm3:ENSMUST00000111220.7	0.445496	0.348872	0.36277	0.420224	0.363451	0.347408
Nasp:ENSMUST00000030457.11	0.413773	0.289491	0.304208	0.37733	0.251531	0.197286
Zrsr2:ENSMUST00000090840.9	0.13447	0.0952349	0.0783876	0.120523	0.0920877	0.0821626
Pnrc2:ENSMUST00000030436.11	0.498616	0.385229	0.428015	0.491998	0.424393	0.415802
Tes3-ps:ENSMUST00000222404.1	0.250753	0.262506	0.26099	0.262795	0.267395	0.236801
Rpl22:ENSMUST00000139685.7	0.209562	0.0865252	0.0793152	0.141924	0.0594916	0.0741153
Mdp1:ENSMUST00000002400.6	0.714657	0.591829	0.520786	0.693266	0.573847	0.482875
Snu13:ENSMUST00000080622.8	0.777283	0.655216	0.646655	0.739182	0.626713	0.645193
Sec22b:ENSMUST00000029476.8	0.220967	0.0991144	0.076049	0.166885	0.0872201	0.0722994
Dync1li2:ENSMUST00000041769.7	0.611625	0.552602	0.507857	0.591316	0.506296	0.495797
Rad23b:ENSMUST00000030134.8	0.460008	0.357702	0.375886	0.445225	0.369465	0.374812
Grpel2:ENSMUST00000238010.1	0.2397	0.201283	0.198859	0.214735	0.194123	0.203927
Rhoa:ENSMUST00000007959.13	0.411278	0.290329	0.322843	0.389785	0.284036	0.316594
Gmfb:ENSMUST00000111817.7	0.790793	0.671568	0.67734	0.790175	0.661084	0.65396
Ube2i:ENSMUST00000049911.15	0.449402	0.316613	0.282229	0.414046	0.305929	0.292036
Zfp706:ENSMUST00000078976.8	0.424753	0.305258	0.31907	0.41435	0.307086	0.347898
Ufd1:ENSMUST00000005394.12	0.599974	0.480989	0.398944	0.596765	0.444851	0.386889
Mettl6:ENSMUST00000055303.4	0.769422	0.653649	0.597221	0.764268	0.722029	0.738852
Pcnp:ENSMUST00000114444.8	0.675325	0.555503	0.563126	0.647148	0.573648	0.562688
Asf1a:ENSMUST00000020004.7	0.203429	0.0858364	0.0634741	0.137417	0.0772184	0.0592451
Usp15:ENSMUST00000220377.1	0.259442	0.114939	0.0814212	0.231231	0.100795	0.0627394
Rcn2:ENSMUST00000114276.2	0.41341	0.296004	0.246419	0.363385	0.278754	0.235932
Marchf5:ENSMUST00000024078.14	0.0994618	0.0564383	0.0519401	0.0818888	0.0561365	0.0457501
Actr10:ENSMUST00000021479.5	0.711096	0.594128	0.520833	0.707994	0.723708	0.778545
Rpp38:ENSMUST00000062672.6	0.555244	0.438441	0.410959	0.611822	0.520245	0.361365
Macir:ENSMUST00000053033.13	0.182014	0.166843	0.133559	0.182387	0.153577	0.119574
Rab10:ENSMUST00000021001.9	0.628985	0.493632	0.479045	0.62453	0.522957	0.477778
Ppid:ENSMUST00000029382.12	0.555274	0.43907	0.448887	0.505023	0.417831	0.44285
Chmp4b:ENSMUST00000044277.9	0.577241	0.461566	0.477643	0.566209	0.467332	0.547056
Crebbp:ENSMUST00000023165.8	0.38897	0.273298	0.213889	0.342907	0.259136	0.226906
Pum3:ENSMUST00000076219.5	0.226977	0.111439	0.146671	0.182135	0.132519	0.155089
Gpbp1:ENSMUST00000047627.13	0.32828	0.213081	0.228146	0.299607	0.236364	0.241
St13:ENSMUST00000172107.7	0.20892	0.0939299	0.109187	0.174616	0.101802	0.123608
Nova2:ENSMUST00000032571.9	0.880666	0.882762	0.853309	0.867129	0.852324	0.791435
Mapre1:ENSMUST00000028981.8	0.180607	0.149584	0.140685	0.177462	0.153766	0.142926
Katnbl1:ENSMUST00000028552.3	0.610756	0.501373	0.498726	0.589039	0.495174	0.503744
Prr12:ENSMUST00000057293.7	0.930663	0.817236	0.735012	0.914894	0.847015	0.727372
Rbbp6:ENSMUST00000098062.8	0.382384	0.268973	0.23475	0.332723	0.225806	0.20603
Scrn1:ENSMUST00000019268.10	0.389184	0.281657	0.265732	0.380076	0.306123	0.279589
Akap8:ENSMUST00000002699.6	0.722416	0.592291	0.588618	0.679165	0.598955	0.540935
Brwd1:ENSMUST00000113827.3	0.761981	0.64674	0.690451	0.779179	0.666943	0.697625
Pnisr:ENSMUST00000098238.8	0.257596	0.146714	0.142184	0.213814	0.13929	0.117407
Cbx8:ENSMUST00000026663.7	0.256043	0.145642	0.186667	0.236587	0.14781	0.129442
Cdk17:ENSMUST00000069965.8	0.851039	0.740977	0.80598	0.826536	0.794025	0.809459
Lzic:ENSMUST00000030842.7	0.26268	0.152692	0.132983	0.219808	0.157756	0.0994354
Nmt1:ENSMUST00000021314.7	0.200672	0.0908289	0.0799819	0.158745	0.0885167	0.0932642
Vrk1:ENSMUST00000085026.11	0.678157	0.570477	0.637624	0.621786	0.599715	0.267424
Ugp2:ENSMUST00000102875.10	0.374721	0.314544	0.326695	0.388869	0.392463	0.375989
Vps26b:ENSMUST00000034470.10	0.34497	0.315835	0.30449	0.338961	0.324606	0.302391
Rnf165:ENSMUST00000026494.13	0.470617	0.363128	0.379785	0.468872	0.399409	0.383667
Zmat2:ENSMUST00000001419.9	0.445033	0.336874	0.352391	0.42888	0.322679	0.4185
Slc25a17:ENSMUST00000023040.8	0.82192	0.713862	0.675025	0.81199	0.748691	0.640087
Prkar2b:ENSMUST00000036497.15	0.801799	0.701212	0.698579	0.78322	0.752303	0.725128
Anp32a:ENSMUST00000085519.12	0.227988	0.156076	0.177767	0.235194	0.167839	0.190235
Selenok:ENSMUST00000112268.2	0.58567	0.477947	0.437363	0.570382	0.468762	0.422734
Cacybp:ENSMUST00000014370.10	0.685384	0.577664	0.583803	0.659917	0.565994	0.58672
Ubxn7:ENSMUST00000115151.4	0.809595	0.702247	0.721405	0.789982	0.775	0.738191
Akt3:ENSMUST00000111160.8	0.790011	0.706695	0.694852	0.773492	0.704024	0.668117
Ergic1:ENSMUST00000167662.7	0.720159	0.622841	0.687923	0.691692	0.650705	0.663742
Acp1:ENSMUST00000062740.14	0.502447	0.425495	0.412564	0.430546	0.372796	0.354737
Phax:ENSMUST00000008445.6	0.592512	0.485761	0.45438	0.564858	0.495284	0.548892
Khdrbs3:ENSMUST00000022954.6	0.849703	0.743226	0.767251	0.837281	0.827939	0.841082
Szrd1:ENSMUST00000102487.3	0.581449	0.475061	0.444708	0.58115	0.495262	0.415907
Vps4a:ENSMUST00000034388.9	0.797203	0.691372	0.741479	0.769673	0.71157	0.740619
Arl16:ENSMUST00000076921.6	0.453114	0.364009	0.321919	0.419813	0.369895	0.405908
Gosr2:ENSMUST00000021329.13	0.679107	0.574864	0.60046	0.640751	0.53126	0.524593
Mindy3:ENSMUST00000028105.12	0.745212	0.671681	0.590795	0.744058	0.666544	0.61598
Rab7:ENSMUST00000113600.9	0.810239	0.704096	0.716883	0.790092	0.710526	0.743946
Saal1:ENSMUST00000143082.3	0.101955	0.042627	0.0495318	0.110767	0.0583621	0.0476047
Brd8:ENSMUST00000003876.9	0.258811	0.153899	0.115056	0.218318	0.116147	0.100785
Spag9:ENSMUST00000041956.13	0.818431	0.707944	0.716969	0.795224	0.712798	0.670059
Lin7c:ENSMUST00000028583.7	0.842566	0.72035	0.68125	0.835149	0.711968	0.664922
Cops8:ENSMUST00000036153.11	0.304941	0.200875	0.216216	0.286697	0.21435	0.206927
Gmps:ENSMUST00000029405.7	0.181148	0.0911198	0.067471	0.167611	0.0989825	0.0596591
Mtpn:ENSMUST00000031866.8	0.682198	0.563951	0.510775	0.622995	0.543583	0.47316
Trappc13:ENSMUST00000144060.7	0.336987	0.215859	0.214159	0.324027	0.207862	0.187575
Gpatch11:ENSMUST00000170759.2	0.302628	0.19176	0.159325	0.303603	0.202305	0.164494
Tmed7:ENSMUST00000151189.1	0.883515	0.782124	0.738808	0.87251	0.771906	0.728884
Mrps23:ENSMUST00000024486.13	0.802168	0.703271	0.724344	0.781933	0.695223	0.693065
Rac1:ENSMUST00000080537.13	0.647125	0.544612	0.520571	0.668811	0.548387	0.470909
Sike1:ENSMUST00000029447.11	0.219969	0.141828	0.101241	0.210995	0.137615	0.106261
Hnrnpa0:ENSMUST00000007980.6	0.694993	0.619526	0.602889	0.683552	0.597535	0.603727
Zfand3:ENSMUST00000226208.2	0.691121	0.589059	0.588521	0.664546	0.585507	0.50367
Smarca5:ENSMUST00000043359.8	0.542685	0.441113	0.440839	0.504619	0.46014	0.457631
Rab3d:ENSMUST00000115351.9	0.377633	0.27609	0.229008	0.348936	0.2875	0.181102
Ube2d2a:ENSMUST00000170693.8	0.358154	0.258237	0.234564	0.340244	0.236661	0.226476
Elf2:ENSMUST00000194641.5	0.809554	0.708398	0.719634	0.764384	0.721068	0.750274
Atf7ip:ENSMUST00000032335.12	0.436206	0.346581	0.352742	0.404223	0.35213	0.339829
Tmem183a:ENSMUST00000049470.10	0.549071	0.426044	0.402068	0.510745	0.421463	0.354725
Cs:ENSMUST00000005826.8	0.815687	0.715036	0.719076	0.810476	0.738179	0.709738
Utp23:ENSMUST00000059599.9	0.288442	0.225064	0.209262	0.28782	0.212038	0.207298
Bub3:ENSMUST00000207442.1	0.223006	0.122589	0.0927746	0.220437	0.11762	0.107202
Rbfox2:ENSMUST00000171751.9	0.177212	0.1961	0.293074	0.161962	0.189896	0.262358
Ddx19a:ENSMUST00000040416.7	0.569913	0.611279	0.629089	0.590471	0.635861	0.636232
Dnajc1:ENSMUST00000166495.7	0.0928514	0.0951966	0.0985274	0.105623	0.103934	0.080969
Timm50:ENSMUST00000081946.4	0.334639	0.436466	0.450266	0.373919	0.375369	0.491341
Fndc4:ENSMUST00000172435.7	0.235566	0.337521	0.339856	0.244369	0.330816	0.329011
Sgce:ENSMUST00000133306.7	0.606541	0.709514	0.963696	0.658769	0.837598	0.976254
Bmerb1:ENSMUST00000056521.11	0.145231	0.25	0.259309	0.17029	0.26009	0.299228
Fcho1:ENSMUST00000093444.12	0.170201	0.289236	0.504718	0.183215	0.419253	0.546208
Ptov1:ENSMUST00000046575.16	0.598218	0.70909	0.773203	0.689772	0.760326	0.777536
Abi1:ENSMUST00000126112.7	0.506003	0.551149	0.562929	0.536742	0.575589	0.550525
Mex3b:ENSMUST00000082237.6	0.566738	0.679748	0.752212	0.601222	0.646962	0.718023
Pea15a:ENSMUST00000013842.11	0.28531	0.399441	0.499479	0.284477	0.356688	0.441995
Foxp4:ENSMUST00000113265.7	0.134354	0.252019	0.213358	0.205263	0.308594	0.225187
Snx2:ENSMUST00000037850.6	0.6235	0.753725	0.90183	0.804723	0.877493	0.97184
M6pr:ENSMUST00000007602.14	0.599774	0.735254	0.74164	0.703512	0.765138	0.75427
Surf4:ENSMUST00000015011.9	0.662607	0.710261	0.70337	0.679553	0.737734	0.692978
Calm1:ENSMUST00000110082.10	0.29781	0.4169	0.514608	0.444394	0.478628	0.574582
Ykt6:ENSMUST00000002818.8	0.675692	0.830391	0.825739	0.844456	0.785799	0.805484
Ube2w:ENSMUST00000117146.8	0.402785	0.418743	0.420337	0.429783	0.416445	0.434591
Smc6:ENSMUST00000218866.1	0.196998	0.360235	0.430009	0.227548	0.191336	0.310216
Gmcl1:ENSMUST00000001185.13	0.636648	0.804523	0.813363	0.723856	0.784144	0.822649
Celf2:ENSMUST00000170438.7	0.302429	0.325571	0.336657	0.294809	0.315705	0.330107
Gclm:ENSMUST00000029769.13	0.57598	0.761043	0.766147	0.54387	0.599299	0.581518
Glud1:ENSMUST00000022322.16	0.501623	0.600462	0.628129	0.490109	0.632472	0.604992
Gabbr1:ENSMUST00000025338.15	0.183263	0.356103	0.48576	0.218802	0.386729	0.461216
Elavl1:ENSMUST00000098950.5	0.228436	0.258781	0.259271	0.239393	0.274681	0.259909
Opa1:ENSMUST00000160597.7	0.597738	0.393153	0.255072	0.476674	0.31358	0.286538
Anapc1:ENSMUST00000014499.9	0.615694	0.404819	0.355279	0.610937	0.375582	0.311893
Baz1a:ENSMUST00000038926.12	0.925211	0.573482	0.617049	0.925081	0.582367	0.604134
Dpm1:ENSMUST00000154111.7	0.733662	0.634155	0.461761	0.730164	0.772465	0.850339
Aptx:ENSMUST00000068125.10	0.752281	0.661405	0.499815	0.707008	0.616243	0.505537
Srp19:ENSMUST00000072576.9	0.691098	0.605452	0.456457	0.640665	0.584367	0.412473
Sh3glb2:ENSMUST00000100215.10	0.637361	0.56196	0.420118	0.575135	0.511173	0.560154
Gpm6b:ENSMUST00000112235.7	0.867724	0.816346	0.65628	0.862949	0.833615	0.637808
Egln1:ENSMUST00000034469.6	0.586045	0.461404	0.374734	0.555238	0.404167	0.394001
Lias:ENSMUST00000031101.9	0.517927	0.448196	0.311135	0.380032	0.351327	0.511314
Ptrhd1:ENSMUST00000179139.2	0.543019	0.546836	0.342438	0.590696	0.575	0.22216
Tm9sf2:ENSMUST00000026624.10	0.680631	0.631212	0.52212	0.67844	0.661604	0.553605
Rpf2:ENSMUST00000045114.12	0.905187	0.876791	0.710504	0.883384	0.868297	0.889329
Fam210b:ENSMUST00000028995.4	0.322281	0.290191	0.228435	0.280028	0.210473	0.170318
Cwc15:ENSMUST00000004200.8	0.706145	0.636077	0.51356	0.619617	0.580439	0.617343
Sec62:ENSMUST00000029256.8	0.282591	0.22076	0.179484	0.263555	0.228511	0.206134
Rexo1:ENSMUST00000057910.15	0.493841	0.426912	0.384331	0.4781	0.473187	0.438722
Timp2:ENSMUST00000017610.9	0.543511	0.377436	0.359859	0.560099	0.379867	0.30881
Rpl27a:ENSMUST00000143107.1	0.25598	0.1614	0.0766589	0.218493	0.225582	0.161104
Mkrn2:ENSMUST00000000449.8	0.158098	0.136223	0.123386	0.157065	0.156227	0.107358
Eif4a1:ENSMUST00000163666.2	0.775509	0.700188	0.600337	0.78816	0.694891	0.559464
Riok2:ENSMUST00000024620.7	0.269651	0.260602	0.276744	0.269338	0.294853	0.296266
Ufm1:ENSMUST00000146598.7	0.492913	0.434603	0.377257	0.484824	0.455657	0.43056
Mrpl18:ENSMUST00000079121.3	0.852601	0.805333	0.684578	0.822436	0.767432	0.555297
Hmgcr:ENSMUST00000022176.14	0.631977	0.446976	0.470497	0.626036	0.531125	0.559803
Macroh2a1:ENSMUST00000016081.12	0.619543	0.565539	0.459063	0.586354	0.556803	0.584248
Vma21:ENSMUST00000114577.7	0.37427	0.336703	0.283786	0.377539	0.337186	0.277968
1600012H06Rik:ENSMUST00000052691.8	0.49797	0.429257	0.339295	0.376874	0.286969	0.244322
Psma3:ENSMUST00000160027.7	0.254751	0.168722	0.0970793	0.254126	0.2575	0.215995
Thap1:ENSMUST00000036807.12	0.584836	0.498203	0.429445	0.578604	0.501703	0.360534
Zfand5:ENSMUST00000237651.1	0.649442	0.607548	0.572658	0.651091	0.604338	0.57999
Coq3:ENSMUST00000029909.2	0.176841	0.14236	0.084293	0.184131	0.139665	0.0993024
Kctd20:ENSMUST00000233197.1	0.673196	0.586605	0.520939	0.657519	0.613062	0.436254
Tmsb15l:ENSMUST00000127404.7	0.660294	0.645159	0.509524	0.603544	0.601459	0.624071
Wdr77:ENSMUST00000010278.11	0.342692	0.271572	0.231523	0.334947	0.273433	0.237931
Eif1:ENSMUST00000049385.13	0.409955	0.359433	0.261279	0.424598	0.36994	0.243163
Derl2:ENSMUST00000143850.7	0.306318	0.236826	0.159112	0.331186	0.197356	0.12153
Lap3:ENSMUST00000046122.10	0.557776	0.461594	0.411619	0.479675	0.375	0.35185
Gsto1:ENSMUST00000026050.7	0.779296	0.781671	0.634674	0.812544	0.728858	0.724267
Huwe1:ENSMUST00000026292.14	0.311453	0.251817	0.222137	0.345557	0.273064	0.198988
Lmo3:ENSMUST00000162772.7	0.233493	0.156007	0.134222	0.199533	0.172976	0.115765
Ptp4a2:ENSMUST00000165853.1	0.58566	0.535632	0.535351	0.540574	0.525201	0.565539
Srebf2:ENSMUST00000023100.7	0.74568	0.6623	0.608511	0.719551	0.612335	0.608233
Tmed4:ENSMUST00000004508.12	0.345511	0.329705	0.20844	0.360495	0.314178	0.177715
Borcs5:ENSMUST00000062755.9	0.933176	0.86904	0.796665	0.899275	0.848214	0.767724
Brcc3:ENSMUST00000033544.13	0.409786	0.383541	0.351184	0.383466	0.36251	0.320677
Nkapd1:ENSMUST00000145139.7	0.445515	0.366096	0.310267	0.477407	0.394303	0.171219
Pole4:ENSMUST00000095786.5	0.598515	0.506391	0.467581	0.603372	0.485902	0.441363
Derl1:ENSMUST00000022993.6	0.639529	0.557314	0.509028	0.6798	0.600723	0.531776
Trpv2:ENSMUST00000018651.13	0.681661	0.68726	0.705778	0.678042	0.693655	0.758816
Ubap2l:ENSMUST00000064639.14	0.309757	0.27734	0.179142	0.340258	0.290387	0.195361
Hnrnpll:ENSMUST00000184635.7	0.632391	0.620601	0.568879	0.571283	0.536335	0.484376
Cbx5:ENSMUST00000118152.7	0.370535	0.34688	0.368096	0.361608	0.382747	0.399613
Yaf2:ENSMUST00000080299.6	0.406815	0.325018	0.279044	0.395387	0.323015	0.279518
Dph3:ENSMUST00000067955.11	0.227278	0.137316	0.101762	0.251835	0.121414	0.0718867
Bdh1:ENSMUST00000115227.9	0.379296	0.269095	0.234998	0.346483	0.209954	0.206903
Slc25a4:ENSMUST00000034049.4	0.696864	0.647123	0.573452	0.609656	0.554447	0.381857
Zfp106:ENSMUST00000055241.12	0.907577	0.787149	0.784364	0.90708	0.794667	0.793787
Fkbp4:ENSMUST00000032508.10	0.633989	0.55757	0.510902	0.648149	0.562125	0.468629
Uqcc1:ENSMUST00000109632.7	0.705664	0.667238	0.603978	0.720203	0.665431	0.608571
Pla2g12a:ENSMUST00000029629.14	0.526799	0.462648	0.406648	0.519639	0.477297	0.415793
Zfp101:ENSMUST00000174512.3	0.562484	0.48334	0.437651	0.511903	0.446283	0.427087
Mcmbp:ENSMUST00000057557.13	0.24702	0.201072	0.192843	0.239057	0.197357	0.175275
Pcgf2:ENSMUST00000179765.7	0.574713	0.499413	0.455895	0.5751	0.464185	0.470201
Eif4ebp2:ENSMUST00000020288.14	0.545504	0.442307	0.410113	0.477426	0.437633	0.379713
Rbm25:ENSMUST00000048155.15	0.699768	0.602487	0.572659	0.665191	0.579848	0.566345
Selenot:ENSMUST00000107924.1	0.842746	0.755209	0.734469	0.808673	0.745588	0.711814
Rpp14:ENSMUST00000023924.3	0.49561	0.402712	0.380773	0.475033	0.426575	0.35509
Rbmx:ENSMUST00000098470.8	0.349405	0.330763	0.263	0.382567	0.328128	0.269387
Cdc42se1:ENSMUST00000053872.11	0.550037	0.524891	0.457196	0.567821	0.531816	0.434247
Lsamp:ENSMUST00000099761.9	0.219378	0.16239	0.0844116	0.236426	0.122541	0.11317
Cnot8:ENSMUST00000108843.7	0.798028	0.747629	0.689501	0.781043	0.754231	0.640662
Ccdc34:ENSMUST00000028580.11	0.226756	0.133474	0.107753	0.207847	0.137654	0.111028
Nfyb:ENSMUST00000130911.7	0.450318	0.345869	0.352401	0.392702	0.328474	0.344583
Rcbtb2:ENSMUST00000164822.7	0.32087	0.229132	0.202599	0.312755	0.226469	0.177016
E130114P18Rik:ENSMUST00000107067.7	0.265595	0.218973	0.150887	0.36	0.249045	0.220664
Rnf115:ENSMUST00000029740.13	0.620499	0.545751	0.506029	0.604213	0.534815	0.476282
Arl4a:ENSMUST00000146905.1	0.192414	0.106452	0.0784457	0.166987	0.134118	0.0872717
Riok3:ENSMUST00000025270.7	0.74171	0.641823	0.627949	0.726118	0.659929	0.532359
Zdhhc3:ENSMUST00000147563.8	0.79922	0.69936	0.685623	0.791732	0.651534	0.609099
Dtx4:ENSMUST00000045521.8	0.958913	0.847222	0.84575	0.915254	0.804124	0.841207
H2aw:ENSMUST00000108817.4	0.20559	0.130394	0.0924664	0.181061	0.134703	0.0935539
Mtfr1l:ENSMUST00000102550.9	0.775462	0.685417	0.662808	0.788863	0.70137	0.661913
Oxr1:ENSMUST00000110297.9	0.721456	0.651395	0.601628	0.713201	0.585174	0.575554
Pak1:ENSMUST00000033040.11	0.565228	0.487638	0.473645	0.600729	0.485735	0.45432
Ylpm1:ENSMUST00000021670.14	0.133731	0.0392344	0.0229226	0.0877581	0.0262217	0.0159166
Kifap3:ENSMUST00000077642.11	0.91698	0.831889	0.806897	0.895574	0.803618	0.826739
Csf2ra:ENSMUST00000076046.6	0.342509	0.220036	0.232911	0.320976	0.171429	0.142857
Kctd5:ENSMUST00000017090.5	0.879211	0.794577	0.770197	0.85266	0.795659	0.721049
Rnmt:ENSMUST00000009679.10	0.171002	0.077167	0.0620015	0.118868	0.0642857	0.0594522
Dcun1d1:ENSMUST00000178098.7	0.294213	0.276595	0.280142	0.278339	0.282127	0.271187
Map4k4:ENSMUST00000168431.6	0.753752	0.726472	0.684085	0.744527	0.70765	0.643169
Stt3b:ENSMUST00000035010.9	0.935838	0.8654	0.827011	0.923988	0.823077	0.847132
Kctd10:ENSMUST00000102581.10	0.965084	0.909609	0.858245	0.955311	0.933054	0.857036
Ap2a2:ENSMUST00000003038.11	0.62518	0.47619	0.518617	0.563161	0.48392	0.490053
Rras2:ENSMUST00000069449.6	0.587136	0.495119	0.480787	0.551813	0.474265	0.484837
Srsf3:ENSMUST00000130216.2	0.263445	0.167337	0.161575	0.235534	0.166289	0.166539
Fbxo3:ENSMUST00000111136.7	0.648142	0.558803	0.542984	0.597251	0.581707	0.555995
Sorbs1:ENSMUST00000226047.1	0.215612	0.182353	0.110651	0.185726	0.165816	0.115124
Otud6b:ENSMUST00000117268.8	0.800127	0.759061	0.743011	0.798902	0.756891	0.743395
BC005624:ENSMUST00000028205.9	0.143976	0.0814095	0.0394251	0.141711	0.109304	0.0488152
Etf1:ENSMUST00000025218.7	0.459894	0.39189	0.368849	0.475335	0.385408	0.284908
Fam32a:ENSMUST00000003123.9	0.595894	0.51236	0.49092	0.634677	0.53171	0.512837
Zfr:ENSMUST00000122941.7	0.893813	0.804416	0.798896	0.867344	0.832276	0.774531
Dnajb1:ENSMUST00000005620.9	0.716415	0.622943	0.612228	0.712127	0.634402	0.613527
Ing2:ENSMUST00000080353.2	0.210034	0.111111	0.109771	0.215172	0.128788	0.0981183
Nras:ENSMUST00000029445.12	0.563042	0.494528	0.45878	0.490482	0.472751	0.372677
Zfp655:ENSMUST00000199322.4	0.816478	0.746168	0.723481	0.79073	0.74	0.685231
Cntnap2:ENSMUST00000114641.7	0.135002	0.12708	0.118731	0.13653	0.121312	0.118456
Cpsf6:ENSMUST00000176686.7	0.254586	0.173322	0.175261	0.229321	0.181307	0.185855
Cnih4:ENSMUST00000134115.7	0.153005	0.0757249	0.0507034	0.142125	0.074329	0.0489942
Tmem9b:ENSMUST00000033333.12	0.859439	0.771796	0.757883	0.853093	0.77748	0.754078
Marchf6:ENSMUST00000090227.5	0.901621	0.820619	0.802387	0.889508	0.823127	0.825216
Ppp6c:ENSMUST00000028087.5	0.447404	0.366887	0.341317	0.410026	0.343851	0.321478
Ryk:ENSMUST00000035142.7	0.56851	0.607502	0.622105	0.574384	0.605492	0.572373
Isy1:ENSMUST00000089497.6	0.123175	0.086719	0.0669407	0.107862	0.0753661	0.0593353
Gm20521:ENSMUST00000134077.1	0.42867	0.495963	0.530806	0.461571	0.533134	0.573289
Neurog2:ENSMUST00000029587.8	0.705707	0.772287	0.808166	0.740331	0.797078	0.798913
Arglu1:ENSMUST00000048545.9	0.252772	0.258512	0.264375	0.243571	0.250576	0.275402
Alg14:ENSMUST00000039442.11	0.133574	0.220833	0.236529	0.15654	0.186078	0.234917
Ppp2r3c:ENSMUST00000021410.9	0.104118	0.147414	0.207553	0.155251	0.183457	0.196879
Pten:ENSMUST00000013807.7	0.143796	0.159132	0.194424	0.141441	0.209714	0.16517
Abhd10:ENSMUST00000066983.12	0.169504	0.122604	0.132243	0.119101	0.101254	0.114049
Ppt1:ENSMUST00000030412.10	0.784689	0.858589	0.879821	0.807127	0.877509	0.762943
Snx10:ENSMUST00000049152.14	0.690373	0.718297	0.793891	0.708416	0.757609	0.76337
Amotl2:ENSMUST00000035121.13	0.674544	0.741979	0.780778	0.704036	0.786629	0.754811
Cab39:ENSMUST00000113360.7	0.680836	0.706667	0.788196	0.706281	0.719944	0.753929
Akirin1:ENSMUST00000102636.3	0.779	0.842004	0.887733	0.801314	0.858185	0.864071
Caprin1:ENSMUST00000028607.12	0.622625	0.660301	0.688959	0.650462	0.677139	0.711119
Ppp3cb:ENSMUST00000159027.7	0.337484	0.392437	0.443766	0.377618	0.408023	0.429178
Tcaf1:ENSMUST00000045054.10	0.456333	0.427559	0.419264	0.437954	0.430816	0.414863
Ubfd1:ENSMUST00000033158.5	0.355777	0.277492	0.290484	0.328025	0.286421	0.305994
Ubxn6:ENSMUST00000019722.11	0.653777	0.730878	0.76722	0.639466	0.635892	0.682916
Wdr12:ENSMUST00000027173.14	0.0669829	0.0749283	0.082817	0.0734973	0.0749065	0.058638
Cryzl1:ENSMUST00000073466.12	0.755273	0.8	0.869497	0.84594	0.866183	0.933789
Zcchc14:ENSMUST00000046386.4	0.674431	0.715942	0.790698	0.684388	0.739796	0.779587
Hbb-bt:ENSMUST00000098192.3	0.419229	0.453058	0.536817	0.434021	0.46432	0.678854
Zmym5:ENSMUST00000039812.15	0.156713	0.138339	0.170685	0.152211	0.141627	0.146452
Dync1li1:ENSMUST00000047404.6	0.668017	0.707931	0.787115	0.683782	0.69779	0.81374
Lsm12:ENSMUST00000107156.8	0.175522	0.208332	0.264341	0.219542	0.235641	0.325871
Mospd1:ENSMUST00000096447.8	0.578181	0.614957	0.69821	0.637823	0.652901	0.686695
Pcmt1:ENSMUST00000159917.7	0.484676	0.537543	0.609152	0.543438	0.552889	0.596767
Mpped2:ENSMUST00000111063.7	0.235657	0.258525	0.303007	0.22935	0.229145	0.264676
Cbx3:ENSMUST00000114445.7	0.76762	0.800336	0.888816	0.696368	0.771641	0.871675
3110040N11Rik:ENSMUST00000026092.8	0.451212	0.481385	0.510806	0.458474	0.499962	0.563866
Slc48a1:ENSMUST00000117892.1	0.0843556	0.162142	0.20864	0.0913877	0.18619	0.194822
Fbxo28:ENSMUST00000051431.9	0.304236	0.332815	0.333789	0.289018	0.326773	0.312428
Ptn:ENSMUST00000101534.4	0.778332	0.886918	0.916825	0.834322	0.854248	0.891023
Pcyox1l:ENSMUST00000025472.6	0.774336	0.786553	0.902808	0.773572	0.828532	0.880478
Kras:ENSMUST00000111710.7	0.250878	0.235321	0.240317	0.239116	0.218377	0.237887
Mau2:ENSMUST00000168013.2	0.600944	0.615148	0.738396	0.441426	0.593619	0.654031
Cirbp:ENSMUST00000105365.8	0.0558314	0.112686	0.187613	0.0755411	0.136448	0.1538
Ythdf2:ENSMUST00000152796.7	0.135199	0.152489	0.26911	0.114345	0.166514	0.293403
Sbds:ENSMUST00000026387.10	0.53905	0.623687	0.676568	0.564537	0.665247	0.677
Rab5b:ENSMUST00000000727.3	0.16886	0.219985	0.306797	0.134894	0.203143	0.301958
Csnk2a1:ENSMUST00000099224.9	0.262983	0.262005	0.387347	0.239784	0.275179	0.432061
Nfix:ENSMUST00000076715.12	0.329205	0.355439	0.470723	0.336021	0.454074	0.571481
Echs1:ENSMUST00000026538.12	0.657964	0.738372	0.802681	0.720027	0.74	0.859621
Ptpn2:ENSMUST00000122412.1	0.562956	0.647707	0.703699	0.597798	0.68786	0.758678
Mlx:ENSMUST00000107302.7	0.227002	0.298465	0.375	0.243823	0.288991	0.332613
Gsk3b:ENSMUST00000023507.12	0.166438	0.168657	0.199915	0.164121	0.204159	0.211747
Arrdc3:ENSMUST00000099356.9	0.796794	0.872004	0.946602	0.81951	0.907317	0.913415
Ckap4:ENSMUST00000053871.4	0.596117	0.678037	0.746957	0.621109	0.655096	0.781063
Bpnt1:ENSMUST00000027916.12	0.719759	0.803832	0.839387	0.725704	0.787753	0.840084
Mtln:ENSMUST00000135091.1	0.225389	0.214922	0.377995	0.273282	0.288929	0.526052
Ndufb5:ENSMUST00000127477.7	0.246063	0.272276	0.399431	0.339802	0.367083	0.36148
Irf2bpl:ENSMUST00000038422.7	0.246814	0.264516	0.400652	0.238619	0.282828	0.425704
Nampt:ENSMUST00000020886.8	0.188409	0.163031	0.198945	0.182242	0.176048	0.156242
Celf1:ENSMUST00000068726.12	0.398432	0.483363	0.564807	0.468355	0.515053	0.610957
Arl6ip1:ENSMUST00000032888.9	0.497709	0.505832	0.545864	0.508873	0.466648	0.567292
Aars:ENSMUST00000034441.7	0.549976	0.59375	0.722297	0.466769	0.597629	0.735051
Cdkn1b:ENSMUST00000067327.10	0.593438	0.635006	0.688965	0.635849	0.65876	0.712887
Zfp41:ENSMUST00000054555.9	0.114549	0.197047	0.28789	0.157212	0.247677	0.291845
Efnb2:ENSMUST00000001319.14	0.845039	0.849743	0.877432	0.840358	0.853227	0.885646
Plpbp:ENSMUST00000209525.1	0.754678	0.853601	0.936677	0.768351	0.881081	0.953642
Pabpc1:ENSMUST00000001809.14	0.41769	0.501091	0.603349	0.408619	0.488885	0.748205
Lrrc58:ENSMUST00000078717.6	0.0539039	0.0857948	0.186274	0.0370216	0.0926908	0.194867
Nell2:ENSMUST00000166170.8	0.742698	0.839002	0.949517	0.904502	0.912907	0.915149
Zfp251:ENSMUST00000080406.6	0.385881	0.43527	0.597855	0.423001	0.517949	0.616304
Asrgl1:ENSMUST00000049948.5	0.0971269	0.122687	0.179808	0.115238	0.134475	0.174671
Aif1l:ENSMUST00000001920.12	0.408686	0.285199	0.458659	0.375291	0.371593	0.408333
Hsdl2:ENSMUST00000030078.11	0.380179	0.403137	0.520107	0.367615	0.443411	0.493171
Ctnnbl1:ENSMUST00000029178.6	0.334888	0.299091	0.409821	0.308361	0.260836	0.133219
H3c8:ENSMUST00000080859.7	0.112245	0.234719	0.344994	0.211221	0.225335	0.249385
Xrn2:ENSMUST00000028921.5	0.765877	0.754098	0.86181	0.821429	0.820614	0.867115
Cfap36:ENSMUST00000020754.9	0.599435	0.562117	0.669779	0.58856	0.501647	0.43037
Pdk3:ENSMUST00000045748.6	0.674228	0.601185	0.496573	0.623318	0.568345	0.625797
Hyal1:ENSMUST00000010195.13	0.979008	0.735154	0.630319	0.943396	0.699784	0.538829
Zzz3:ENSMUST00000106100.8	0.408912	0.288457	0.187766	0.330014	0.276218	0.223174
Osgin2:ENSMUST00000037198.9	0.750279	0.69754	0.554463	0.747651	0.599165	0.523458
Lyrm9:ENSMUST00000147875.8	0.346827	0.269453	0.162453	0.339941	0.240813	0.152942
Bet1:ENSMUST00000049166.4	0.756028	0.659064	0.684138	0.778383	0.640422	0.715932
Rab3ip:ENSMUST00000020375.6	0.202482	0.138607	0.149628	0.243614	0.133031	0.136738
Mrrf:ENSMUST00000028250.8	0.131579	0.0598291	0.0372993	0.175779	0.0605686	0.0327273
Tra2b:ENSMUST00000161286.7	0.797421	0.711179	0.703713	0.798227	0.685748	0.710566
Polr3k:ENSMUST00000039551.8	0.362942	0.300065	0.277925	0.37421	0.285408	0.291687
Pitpna:ENSMUST00000143219.7	0.327012	0.266668	0.257567	0.310256	0.258923	0.242865
4931428F04Rik:ENSMUST00000212922.1	0.780755	0.653752	0.581272	0.764045	0.656761	0.568284
Zfp277:ENSMUST00000069692.9	0.130199	0.0695341	0.0528338	0.167398	0.0627063	0.0552585
Pccb:ENSMUST00000149322.7	0.797297	0.714451	0.739194	0.780655	0.675966	0.718036
Ube2a:ENSMUST00000200835.3	0.279458	0.222149	0.197216	0.278334	0.177038	0.165836
Arfrp1:ENSMUST00000170190.7	0.284782	0.219834	0.219788	0.264861	0.203245	0.205696
Eid2b:ENSMUST00000094651.3	0.269679	0.315984	0.495402	0.261766	0.376018	0.527383
Pnrc1:ENSMUST00000049357.9	0.891494	0.893581	0.886364	0.900715	0.836658	0.646002
Sccpdh:ENSMUST00000040538.9	0.704569	0.682081	0.611794	0.726677	0.663328	0.504524
Mtfr1:ENSMUST00000130645.7	0.609779	0.65629	0.573166	0.637377	0.661574	0.488138
Arl4c:ENSMUST00000159814.1	0.369459	0.32954	0.319795	0.369443	0.329188	0.193337
Prepl:ENSMUST00000072406.4	0.810722	0.61192	0.696509	0.812045	0.664661	0.623553
Nit2:ENSMUST00000023432.9	0.476694	0.417965	0.466415	0.582799	0.492502	0.399327
Fxn:ENSMUST00000081333.10	0.144214	0.117194	0.114484	0.128245	0.0997362	0.0822305
Nudt4:ENSMUST00000020217.6	0.669753	0.615897	0.576081	0.684702	0.648047	0.515281
Trp53bp1:ENSMUST00000110647.7	0.266211	0.253698	0.236711	0.356612	0.261822	0.189959
Ubl4a:ENSMUST00000155676.7	0.423755	0.378008	0.367216	0.415066	0.345824	0.249906
Tmem14c:ENSMUST00000021790.6	0.285969	0.267606	0.247467	0.263348	0.244672	0.186049
Carhsp1:ENSMUST00000008537.9	0.651673	0.667259	0.572955	0.684663	0.657235	0.527287
Snx27:ENSMUST00000029783.15	0.391153	0.343929	0.344904	0.357387	0.341261	0.335701
Reep1:ENSMUST00000121469.1	0.934602	0.85274	0.80245	0.937104	0.888514	0.783333
Trappc5:ENSMUST00000044857.3	0.387401	0.327604	0.319577	0.392938	0.329088	0.24163
Zfp68:ENSMUST00000110905.8	0.374805	0.308815	0.283026	0.389434	0.299061	0.24
Id4:ENSMUST00000021810.2	0.438976	0.391757	0.398022	0.423155	0.390634	0.411433
Psmd12:ENSMUST00000021063.12	0.427571	0.45348	0.46406	0.449789	0.386125	0.306169
Ak6:ENSMUST00000022135.14	0.650027	0.615639	0.561781	0.62844	0.608528	0.485595
Prrc2b:ENSMUST00000036691.13	0.752505	0.697382	0.668262	0.732534	0.679345	0.591297
Amz2:ENSMUST00000092500.10	0.262869	0.198442	0.181675	0.244757	0.193277	0.161634
H1f0:ENSMUST00000180086.2	0.947483	0.907563	0.881391	0.930263	0.880376	0.792686
Nt5c2:ENSMUST00000235234.1	0.296886	0.221505	0.262679	0.293179	0.200501	0.156226
Elovl4:ENSMUST00000034796.13	0.539484	0.496336	0.451033	0.535212	0.489452	0.450123
Gadd45gip1:ENSMUST00000036734.5	0.352026	0.254716	0.31835	0.429156	0.363636	0.299217
Tomm20:ENSMUST00000179857.2	0.305313	0.275716	0.299307	0.315931	0.282386	0.256211
Cggbp1:ENSMUST00000067744.7	0.586398	0.564405	0.551399	0.613651	0.550292	0.488884
Mxd4:ENSMUST00000042701.12	0.377121	0.323073	0.307061	0.339403	0.293613	0.266146
Fxr1:ENSMUST00000197694.4	0.376615	0.355054	0.317172	0.408549	0.332607	0.281618
Cyb5r3:ENSMUST00000162834.2	0.849907	0.867657	0.795276	0.870784	0.856061	0.743922
Ip6k1:ENSMUST00000035214.10	0.925129	0.860947	0.840878	0.890895	0.807739	0.767406
Coq4:ENSMUST00000028137.9	0.229164	0.217555	0.136789	0.22943	0.208458	0.102889
Hnrnpab:ENSMUST00000074669.9	0.330921	0.338149	0.340918	0.33652	0.325944	0.302817
Ttc3:ENSMUST00000231569.1	0.919638	0.897277	0.889716	0.917829	0.857605	0.797827
Rbm26:ENSMUST00000163545.7	0.250458	0.276423	0.237539	0.306167	0.277778	0.186984
Mul1:ENSMUST00000044058.10	0.261382	0.259096	0.244269	0.298333	0.304577	0.179518
Uqcc3:ENSMUST00000096253.6	0.616314	0.536197	0.540736	0.642311	0.596276	0.523546
Wdr48:ENSMUST00000215307.1	0.833107	0.774078	0.759718	0.837123	0.801389	0.744299
Coa6:ENSMUST00000059093.6	0.117554	0.102299	0.0544912	0.160629	0.117992	0.0429062
Nav1:ENSMUST00000040599.14	0.562494	0.513235	0.441357	0.536003	0.461052	0.321855
Rgma:ENSMUST00000119206.2	0.183093	0.366355	0.153544	0.233522	0.229478	0.116117
Tm7sf3:ENSMUST00000037709.15	0.820166	0.779747	0.735986	0.851082	0.751866	0.734821
Tardbp:ENSMUST00000084125.9	0.236253	0.214009	0.199092	0.218199	0.199122	0.168348
Ccdc59:ENSMUST00000020049.8	0.470357	0.430083	0.468621	0.464638	0.440807	0.381735
Ogdh:ENSMUST00000003461.14	0.254856	0.278652	0.266493	0.279887	0.233508	0.175398
Desi1:ENSMUST00000152227.7	0.61103	0.541348	0.56527	0.607644	0.565539	0.520398
Scnm1:ENSMUST00000172572.8	0.501799	0.507723	0.507799	0.501946	0.491888	0.38763
Elp6:ENSMUST00000068071.11	0.235187	0.156898	0.137313	0.212766	0.144068	0.0993357
Pabpn1:ENSMUST00000116476.8	0.529005	0.554209	0.54131	0.566975	0.571402	0.530239
Pdha1:ENSMUST00000033662.8	0.921903	0.834527	0.828468	0.916727	0.842546	0.807478
Ccdc174:ENSMUST00000037783.6	0.725469	0.631115	0.628235	0.716646	0.676654	0.607663
Csnk1g3:ENSMUST00000069597.7	0.58683	0.492163	0.496506	0.580988	0.501378	0.468899
Get4:ENSMUST00000026976.11	0.418118	0.364274	0.364508	0.439495	0.341414	0.332604
Syncrip:ENSMUST00000069221.11	0.250909	0.247639	0.252197	0.261564	0.249875	0.199649
Cdc37l1:ENSMUST00000225210.1	0.878855	0.866584	0.829042	0.903564	0.835294	0.797143
Ddx42:ENSMUST00000021046.5	0.722838	0.664029	0.635538	0.726608	0.68553	0.618309
Pkia:ENSMUST00000028999.11	0.729435	0.731237	0.733791	0.760228	0.727876	0.675303
Cinp:ENSMUST00000043716.8	0.896608	0.84127	0.82053	0.896393	0.840194	0.79008
Gatd1:ENSMUST00000106008.2	0.925364	0.869154	0.847013	0.902221	0.86324	0.796136
Ddx27:ENSMUST00000018143.15	0.964075	0.876596	0.900923	0.948387	0.94507	0.842503
Hnrnpdl:ENSMUST00000128187.7	0.536986	0.470416	0.46576	0.530928	0.46378	0.469213
Crbn:ENSMUST00000013882.9	0.245518	0.142943	0.147311	0.233876	0.168108	0.122332
Acat1:ENSMUST00000034547.5	0.258696	0.168174	0.173727	0.288099	0.192317	0.184415
Actr1b:ENSMUST00000043951.9	0.400181	0.373541	0.310299	0.384058	0.354968	0.282116
Dut:ENSMUST00000051605.8	0.845555	0.827214	0.807642	0.827511	0.816665	0.725731
Smarce1:ENSMUST00000103133.3	0.516763	0.474546	0.494839	0.579693	0.513748	0.477964
Fbxo31:ENSMUST00000059018.13	0.192038	0.133789	0.129182	0.195817	0.128039	0.0950255
Set:ENSMUST00000102866.9	0.187232	0.177799	0.217845	0.192666	0.208535	0.232665
Csnk1e:ENSMUST00000117786.7	0.419166	0.42172	0.444929	0.416597	0.437968	0.514221
Twf1:ENSMUST00000023087.12	0.625238	0.624729	0.663986	0.614804	0.640544	0.678676
Cmip:ENSMUST00000166750.8	0.502036	0.577405	0.587547	0.506282	0.561425	0.590725
Zcchc3:ENSMUST00000099207.4	0.275253	0.279783	0.33358	0.259769	0.295193	0.364881
Tmx4:ENSMUST00000038228.10	0.164455	0.203874	0.211687	0.157355	0.177316	0.262918
Nr2f2:ENSMUST00000032768.14	0.230356	0.226229	0.282255	0.244596	0.253701	0.2485
Drg2:ENSMUST00000018568.3	0.869175	0.92448	0.94453	0.838422	0.882234	0.953849
Klf13:ENSMUST00000183817.1	0.179297	0.230933	0.276854	0.169169	0.230253	0.286745
Amd1:ENSMUST00000099945.5	0.370365	0.348604	0.424401	0.364019	0.350387	0.479388
Rer1:ENSMUST00000030914.3	0.407651	0.410404	0.409621	0.361528	0.349549	0.427508
Rnaseh2b:ENSMUST00000022499.12	0.169599	0.217265	0.249874	0.230501	0.212708	0.356031
Rexo2:ENSMUST00000034524.4	0.748753	0.693442	0.74097	0.720688	0.781215	0.847438
Rala:ENSMUST00000009003.8	0.326226	0.232623	0.287427	0.254287	0.204423	0.276939
1110059G10Rik:ENSMUST00000035154.3	0.769707	0.715729	0.720646	0.70385	0.732809	0.835158
Dynlt2b:ENSMUST00000080316.7	0.671957	0.639027	0.596316	0.614429	0.596646	0.747181
Uqcrc2:ENSMUST00000033176.6	0.315172	0.325697	0.339031	0.339624	0.368917	0.472953
Psmd10:ENSMUST00000112978.1	0.197246	0.260143	0.291311	0.21802	0.281166	0.355449
Serbp1:ENSMUST00000042990.6	0.228508	0.288262	0.303618	0.297165	0.330242	0.408121
Soga3:ENSMUST00000092629.3	0.353592	0.435314	0.475676	0.350607	0.380812	0.495652
Rps25:ENSMUST00000080300.8	0.0559397	0.0769832	0.0910016	0.0908514	0.0893405	0.251135
Bzw2:ENSMUST00000020856.5	0.580344	0.506887	0.543943	0.630453	0.651596	0.792727
Zfp148:ENSMUST00000165418.8	NA	NA	NA	0.130256	0.101835	0.164381
Tpm2:ENSMUST00000030184.11	0.118644	0.395833	0.27957	0.221622	0.2592	0.623377
Qk:ENSMUST00000042296.8	0.230539	0.711765	0.862443	0.306748	0.715686	0.844048
H4c9:ENSMUST00000102977.3	0.640813	0.724046	0.751313	0.529503	0.682631	0.797601
Tpm1:ENSMUST00000113690.7	0.524859	0.887006	0.985294	0.564157	0.884615	0.991692
Pdia4:ENSMUST00000077290.8	0.187082	0.208009	0.210873	0.240846	0.224581	0.330819
Cemip2:ENSMUST00000025663.7	0.348044	0.372185	0.431619	0.347812	0.375308	0.483553
Cadm1:ENSMUST00000114548.7	0.775394	0.742507	0.783528	0.724412	0.667143	0.761981
Lztfl1:ENSMUST00000026274.13	0.228654	0.142096	0.130758	0.205309	0.142962	0.12057
H3c6:ENSMUST00000105107.1	0.557952	0.243969	0.210811	0.420881	0.323398	0.182175
2810408A11Rik:ENSMUST00000102580.9	0.363348	0.35727	0.304033	0.38598	0.414868	0.3125
Zfp442:ENSMUST00000109916.7	0.228885	0.235824	0.203435	0.224389	0.214058	0.197671
Tle3:ENSMUST00000178113.7	0.592535	0.572815	0.573341	0.546151	0.597528	0.490877
Pex19:ENSMUST00000111252.3	0.457507	0.512641	0.478148	0.466884	0.512175	0.405594
H4c8:ENSMUST00000102972.5	0.225166	0.148225	0.149894	0.222772	0.233969	0.125984
Snx5:ENSMUST00000028909.4	0.418598	0.438182	0.471464	0.548428	0.572353	0.47097
Wdr4:ENSMUST00000171171.8	0.338235	0.244648	0.200789	0.289082	0.228145	0.113951
Epc1:ENSMUST00000050542.5	0.569555	0.440503	0.435304	0.53012	0.469789	0.351719
Slu7:ENSMUST00000020681.9	0.330564	0.291883	0.286743	0.345755	0.300811	0.241417
Yipf4:ENSMUST00000024873.6	0.376082	0.376683	0.319624	0.387065	0.409739	0.316756
Smarcc1:ENSMUST00000197984.4	0.373766	0.38992	0.375587	0.346422	0.3829	0.253271
Pyroxd1:ENSMUST00000041852.7	0.301135	0.284678	0.277108	0.312849	0.27655	0.222601
Ttc14:ENSMUST00000099153.9	0.232155	0.220063	0.217585	0.230408	0.221549	0.217319
Kif23:ENSMUST00000034815.8	0.688095	0.633555	0.599596	0.62498	0.658356	0.504878
Ino80c:ENSMUST00000055012.11	0.745877	0.623734	0.553498	0.6898	0.599671	0.442685
H3c7:ENSMUST00000075558.4	0.572414	0.208331	0.114471	0.528812	0.381327	0.191657

## Sheet: btw
Across-UTR level WARM values for each cell-type in developing mouse brain dataset
	Dorsal_GLU	Dorsal_IPC	Dorsal_RGC	Ventral_GAB	Ventral_NB	Ventral_RGC
Syngr1	0.664007	0.136042	0.0554072	0.453087	0.141809	0.0288363
Luc7l	0.868056	0.350271	0.266781	0.744604	0.434938	0.318317
Dclk1	0.546576	0.12601	0.0357143	0.303647	0.0822222	0.0407855
Rnf130	0.761305	0.344635	0.27452	0.654694	0.331214	0.204527
Itsn1	0.498026	0.167546	0.128703	0.295984	0.110764	0.0880342
Rdx	0.335505	0.0113086	0.00663285	0.250355	0.026694	0.00471698
Ap1s2	0.991413	0.698046	0.468468	0.980312	0.69469	0.477656
Bcl7c	0.445006	0.169949	0.145392	0.440693	0.165312	0.154296
Gnao1	0.88684	0.630229	0.70006	0.830234	0.675365	0.648936
Septin11	0.645627	0.573794	0.513926	0.614245	0.57315	0.540112
Atp2a2	0.422898	0.204425	0.195251	0.337942	0.20398	0.169634
Tpm1	0.617342	0.400745	0.423541	0.557678	0.460998	0.494589
Umad1	0.336269	0.12766	0.183516	0.262192	0.181319	0.128788
Gabpb1	0.817254	0.641132	0.729539	0.786478	0.689608	0.683168
Zwint	0.900234	0.726955	0.675531	0.881924	0.76119	0.671731
Fgfr1op2	0.909061	0.740355	0.707451	0.864699	0.764561	0.711929
Cacna2d1	0.701111	0.534336	0.563981	0.666667	0.594595	0.517986
Ccdc88a	0.743842	0.664868	0.697581	0.733061	0.711771	0.694595
Ppp3cb	0.974381	0.82121	0.652584	0.923109	0.788328	0.63164
Dlg4	0.91013	0.760766	0.768248	0.902603	0.802292	0.653716
Tut7	0.737677	0.589147	0.561865	0.63052	0.561862	0.480663
Thra	0.854983	0.710912	0.723842	0.825007	0.72677	0.728748
Cinp	0.758492	0.62253	0.597118	0.733671	0.570442	0.52707
Eif4e2	0.22731	0.0960598	0.0762332	0.161314	0.076799	0.0531804
Mkrn1	0.697327	0.574194	0.552627	0.65869	0.543182	0.461162
Nsd1	0.767473	0.647153	0.598726	0.671791	0.593203	0.518052
Hmg20a	0.67641	0.663069	0.676402	0.678004	0.686508	0.699779
Stau2	0.5999	0.537025	0.553122	0.582815	0.545821	0.529744
Epc1	0.631203	0.518987	0.466326	0.574515	0.513235	0.415966
Ntrk3	0.925283	0.816653	0.611234	0.893366	0.77907	0.51087
Gm20498	0.804087	0.697229	0.702738	0.763239	0.722887	0.693804
Ubap2l	0.304151	0.241592	0.216427	0.27882	0.252995	0.212847
Cux1	0.741309	0.641026	0.660292	0.683245	0.595783	0.654862
Sirt5	0.829359	0.729102	0.782278	0.784858	0.733234	0.781335
Qk	0.85338	0.753266	0.566927	0.828331	0.74954	0.615385
Triobp	0.795602	0.902439	0.967419	0.764211	0.890777	0.960437
Armc8	0.25201	0.365805	0.536364	0.307692	0.41716	0.60239
Fubp1	0.644251	0.759425	0.805608	0.708003	0.775271	0.839208
Ccdc50	0.630713	0.746906	0.723857	0.625431	0.696067	0.801773
Polr1d	0.412056	0.534027	0.571286	0.512494	0.557466	0.535602
Araf	0.03125	0.153316	0.261724	0.0360166	0.152988	0.351244
Cxadr	0.070023	0.196545	0.172568	0.0777954	0.140303	0.159476
Nectin2	0.0724802	0.213155	0.239921	0.0972316	0.207877	0.300662
Rasgef1b	0.81854	0.973356	0.961165	0.71953	0.955172	0.989691
Nsd2	0.234043	0.413368	0.491706	0.232076	0.403927	0.568149
Klc1	0.0758246	0.271866	0.447819	0.0678641	0.255381	0.527478
Epha7	0.713273	0.922092	0.94894	0.7173	0.907285	0.953947
Magi1	0.172171	0.397995	0.699486	0.142368	0.453168	0.709902
Phf20l1	0.0972769	0.333551	0.435328	0.125	0.38056	0.412894
Cyhr1	0.288982	0.534072	0.519885	0.467753	0.544118	0.564133
Map4	0.677488	0.947447	0.938021	0.732623	0.90998	0.96976
Arhgef7	0.509166	0.825175	0.926288	0.538579	0.849162	0.948509
Cdc42	0.431983	0.820272	0.925702	0.454467	0.813402	0.942882
Atat1	0.200514	0.669135	0.66921	0.198049	0.596313	0.723541
Masp1	0.170618	0.683861	0.748543	0.112813	0.445545	0.649852
Tmod3	0.40368	0.957027	0.980083	0.498263	0.941356	0.983624
Ntrk2	0.793156	0.522173	0.473837	0.726369	0.50303	0.476943
Septin6	0.867556	0.461756	0.509718	0.89607	0.593064	0.495829
Dab1	0.535978	0.164912	0.304582	0.526749	0.348214	0.28719
Kmt5b	0.909698	0.832957	0.695169	0.870134	0.765957	0.695724
1500011B03Rik	0.579327	0.595727	0.382782	0.596685	0.541385	0.374217
Macrod2	0.432873	0.3692	0.24218	0.413875	0.213549	0.163486
Kif1b	0.990047	0.933553	0.803484	0.985211	0.928155	0.777899
Ndel1	0.825839	0.772198	0.670037	0.752661	0.705295	0.727332
Nrf1	0.718217	0.660962	0.575791	0.743509	0.677743	0.559556
Zfp467	0.745075	0.549875	0.607349	0.681208	0.60771	0.5709
Vti1a	0.945678	0.85	0.813126	0.921368	0.889213	0.76554
Cep70	0.915935	0.840838	0.785781	0.920155	0.827465	0.851097
Smarcad1	0.262591	0.16307	0.136961	0.205159	0.122449	0.0817671
Mthfd2l	0.476331	0.536705	0.372545	0.569685	0.544399	0.424857
Dtymk	0.336231	0.400823	0.438995	0.367806	0.411977	0.452772
Wdr33	0.181654	0.210023	0.284537	0.160141	0.235944	0.295257
Syncrip	0.771876	0.84347	0.876514	0.755861	0.843236	0.834758
Fam53b	0.195784	0.267565	0.300836	0.193503	0.267516	0.28603
Cbx1	0.145795	0.228525	0.253682	0.177742	0.230978	0.454867
Copg1	0.681173	0.778123	0.789128	0.658767	0.75873	0.794275
Snx12	0.142886	0.215792	0.254838	0.110417	0.217931	0.219089
Ralgps2	0.733646	0.755365	0.848126	0.721056	0.798489	0.902181
Ak2	0.585542	0.660458	0.703118	0.621589	0.675244	0.737197
Glod4	0.108165	0.141204	0.22864	0.0901123	0.164179	0.262738
Epha5	0.120147	0.140609	0.241956	0.129906	0.146907	0.183871
Ppm1b	0.261808	0.276125	0.279136	0.234264	0.262911	0.2784
Psip1	0.209706	0.292646	0.34536	0.233344	0.330734	0.336569
Ppt1	0.688761	0.770262	0.83021	0.684103	0.748141	0.843972
Zfp451	0.0675561	0.13654	0.210665	0.0644706	0.195996	0.286408
Cacfd1	0.73456	0.812763	0.879224	0.789026	0.832808	0.878358
Cds2	0.638316	0.72205	0.783534	0.624796	0.709141	0.839255
Tdp2	0.664028	0.747291	0.810783	0.658339	0.728969	0.838489
Med25	0.140697	0.238739	0.295017	0.181026	0.283628	0.364042
Sun1	0.662019	0.758475	0.819929	0.676829	0.776167	0.839724
Entpd4	0.734839	0.770642	0.897343	0.758586	0.858491	0.923544
Entpd4b	0.734839	0.770642	0.897343	0.758586	0.858491	0.923544
Fkbp5	0.641036	0.728337	0.809615	0.651885	0.79142	0.84828
Cnot4	0.282541	0.378406	0.469965	0.33244	0.391641	0.519591
Afdn	0.710879	0.773694	0.907743	0.642977	0.780186	0.885802
Rbbp6	0.147366	0.243655	0.439765	0.125858	0.32379	0.533594
Rufy3	0.0268102	0.110862	0.37175	0.0325703	0.0900768	0.332291
Asph	0.239731	0.518759	0.634847	0.211382	0.492264	0.629953
Rbm33	0.737991	0.655875	0.830682	0.662458	0.750909	0.86578
E130308A19Rik	0.639889	0.591912	0.70028	0.579046	0.616438	0.676986
Chfr	0.661003	0.624483	0.727169	0.619517	0.693122	0.777063
Gad1	0.872549	0.6875	0.8	0.725786	0.53792	0.722222
Zfp64	0.52016	0.501348	0.501087	0.561667	0.491743	0.484988
Capn10	0.595861	0.630453	0.648822	0.56576	0.666211	0.660703
Ccnd2	0.85095	0.945979	0.949492	0.796245	0.916353	0.967966
Pfdn6	0.771819	0.752869	0.741303	0.762427	0.750529	0.607283
Fam220a	0.749629	0.738514	0.724991	0.759136	0.70203	0.60647
Cops7a	0.372508	0.383759	0.311353	0.400506	0.358794	0.288421
Vps53	0.801354	0.793469	0.766204	0.804753	0.789062	0.69907
Slc35b2	0.897133	0.88836	0.864383	0.896022	0.901115	0.792661
Cisd2	0.807852	0.833913	0.856675	0.766005	0.802837	0.866077
Alkbh1	0.312546	0.344713	0.39311	0.306056	0.344633	0.407509
Rbm39	0.448063	0.448552	0.489385	0.462558	0.464331	0.566003
Ank2	0.884474	0.908549	0.966989	0.871765	0.948775	0.975957
Pdlim7	0.0306306	0.052788	0.0814578	0.0360378	0.0514676	0.143869
Cwc25	0.327404	0.317623	0.35164	0.340032	0.33237	0.462049
Lcor	0.200831	0.214724	0.258287	0.147281	0.235683	0.275748
Nisch	0.5874	0.570789	0.596704	0.572192	0.570489	0.663881
Bcl11a	0.484722	0.442837	0.533804	0.45874	0.422942	0.594901
Thap2	0.408946	0.438342	0.471983	0.368479	0.454508	0.505272
Synj2bp	0.76357	0.782022	0.787178	0.766446	0.801613	0.85602
Rint1	0.449975	0.478491	0.537273	0.435155	0.524145	0.595612
Olfm1	0.550006	0.555016	0.630435	0.626873	0.595506	0.723008
Gatad1	0.702588	0.706941	0.667563	0.648508	0.651685	0.763429
Mxra7	0.666667	0.587156	0.829405	0.536082	0.709809	0.810248
Agap3	0.857554	0.852252	0.780045	0.793763	0.8175	0.706625
Dnm2	0.386713	0.285326	0.245229	0.457658	0.324284	0.192965
