# Supplementary material for: Infernape uncovers cell type–specific and spatially resolved alternative polyadenylation in the brain
Source: HighWire-hosted journal article supplement (doi:10.1101/gr.277864.123), 2023-10-01
Supplement: Supplemental_Tables.zip [file Supplemental_Table_S10.xlsx]

## Sheet: lengthening
	La Manno et al. 2021
	Total number of genes: 297
	cluster	enrichment score	category	term	count	p-value	Benjamini
	1	5.04	UP_KW_PTM	Ubl conjugation	67	4.07e-05	0.000146685
	2	4.23	UP_KW_BIOLOGICAL_PROCESS	Protein transport	27	4.09292e-06	0.000155531
	3	3.12	KEGG_PATHWAY	Ubiquitin mediated proteolysis	11	5.30965e-05	0.00369905
	4	3.03	GOTERM_MF_DIRECT	Ubiquitin protein ligase activity	16	6.80668e-05	0.0072321
	5	2.87	GOTERM_MF_DIRECT	RNA binding	30	1.92124e-05	0.00461896
	6	2.67	UP_KW_CELLULAR_COMPONENT	Endoplasmic reticulum	32	0.00235684	0.0212115
	7	2.62	GOTERM_MF_DIRECT	Phosphatase inhibitor activity	4	0.000184254	0.0156615
	8	2.61	UP_KW_BIOLOGICAL_PROCESS	Cell cycle	22	0.0013896	0.0264023
	9	2.59	GOTERM_BP_DIRECT	ER to Golgi vesicle-mediated transport	9	0.00017595	0.0358184
	10	2.57	GOTERM_BP_DIRECT	mRNA processing	19	2.45146e-06	0.00174667
	Di Bella DJ at al. 2021
	Total number of genes: 94
	cluster	enrichment score	category	term	count	p-value	Benjamini
	1	2.95	UP_KW_BIOLOGICAL_PROCESS	Protein transport	14	4.2e-05	0.002
	2	2.46	GOTERM_CC_DIRECT	ER to Golgi transport vesicle	6	3.5e-05	0.0038
	3	2.45	UP_KW_CELLULAR_COMPONENT	Mitochondrion outer membrane	6	0.00039	0.012
	4	2.03	GOTERM_CC_DIRECT	Glutamatergic synapse	10	0.0015	0.047
	5	1.98	KEGG_PATHWAY	Ubiquitin mediated proteolysis	6	0.00057	0.068
	References:
	La Manno G, Siletti K, Furlan A, Gyllborg D, Vinsland E, Mossi Albiach A, Mattsson Langseth C, Khven I, Lederer AR, Dratva LM et al. 2021. Molecular architecture of the developing mouse brain. Nature 596: 92-96.
	Di Bella DJ, Habibi E, Stickels RR, Scalia G, Brown J, Yadollahpour P, Yang SM, Abbate C, Biancalani T, Macosko EZ et al. 2021. Molecular logic of cellular diversification in the mouse cerebral cortex. Nature 595: 554-559.

## Sheet: shortening
	La Manno et al. 2021
	Total number of genes: 87
	cluster	enrichment score	category	term	count	p-value	Benjamini
	1	2.62	UP_KW_MOLECULAR_FUNCTION	RNA-binding	12	4.85898e-05	0.00174923
	2	1.47	GOTERM_BP_DIRECT	nervous system development	7	0.00695882	1
	3	1.37	GOTERM_BP_DIRECT	protein dephosphorylation	4	0.0195792	1
	4	1.24	GOTERM_BP_DIRECT	regulation of cell cycle	5	0.026951	1
	5	1.05	GOTERM_CC_DIRECT	lysosome	6	0.0350548	0.493271
	6	1.01	GOTERM_BP_DIRECT	protein transport	8	0.0114136	1
	Di Bella DJ at al. 2021
	Total number of genes: 33
	cluster	enrichment score	category	term	count	p-value	Benjamini
	1	1.81	GOTERM_CC_DIRECT	glutamatergic synapse	6	0.0024	0.16
	2	1.24	GOTERM_MF_DIRECT	nucleotide binding	7	0.028	1
