# Supplementary material for: Infernape uncovers cell type–specific and spatially resolved alternative polyadenylation in the brain
Source: HighWire-hosted journal article supplement (doi:10.1101/gr.277864.123), 2023-10-01
Supplement: Supplemental_Tables.zip [file Supplemental_Table_S11.xlsx]

## Sheet: RBP_APA_corr_filtered
Pearson correlation coefficient between RBP expression and APA across cells in the developing mouse brain dataset
	Celf2	Celf4	Cirbp	Cnbp	Dkc1	Eef1d	Eif4a2	Eif5a	Elavl3	Emg1	Eno1	Ezh2	Hnrnpa1	Hnrnpf	Hnrnpu	Igf2bp1	Impdh2	Lsm2	Ncl	Npm1	Nudt21	Nudt5	Ran	Rbfox1	Rbfox2	Slbp	Snrpa1	Snrpb	Snrpn	Sox9	Srsf2	Srsf3	Srsf7	Srsf9	Zfp36l1
Neurog2:ENSMUST00000029587.8	-0.0709364	-0.0487857	-0.0599595	0.0734739	0.0544726	0.0807683	-0.0609561	0.0512604	-0.0936302	0.0623751	0.0671757	0.0272768	0.0436765	0.0750189	0.0379113	0.0433689	0.0533749	0.0547575	0.0417641	0.0694183	0.0384605	0.0352528	0.0782685	-0.0810213	-0.10567	0.0450426	0.0454014	0.0461	-0.0288446	0.0705441	0.0492137	0.0443623	0.0401605	0.0590473	0.0732194
Ddx19a:ENSMUST00000040416.7	-0.0589841	-0.0458277	-0.0600774	0.0698532	0.0507629	0.0663611	-0.0547696	0.0422419	-0.0677227	0.0515858	0.0534583	0.0523462	0.0485665	0.0698388	0.05625	0.0376606	0.0453367	0.0691445	0.0612769	0.0538294	0.0521631	0.0524429	0.0788615	-0.04308	-0.0780596	0.0795745	0.0615575	0.0622773	-0.0608736	0.0512432	0.0523789	0.0610425	0.0599417	0.0429661	0.0410551
Ptov1:ENSMUST00000046575.16	-0.132854	-0.0777138	-0.11338	0.0974205	0.096271	0.125301	-0.129418	0.0772282	-0.111277	0.0845398	0.0282495	0.0865175	0.100732	0.121589	0.0941346	0.0963943	0.0702906	0.107273	0.0961041	0.105802	0.0942981	0.097484	0.135171	-0.122994	-0.120115	0.10886	0.0814731	0.108396	-0.0244104	0.106168	0.107344	0.110979	0.0888801	0.0909225	0.0990063
M6pr:ENSMUST00000007602.14	-0.0838838	-0.0611715	-0.0686304	0.0753198	0.0520113	0.0776747	-0.0773948	0.0561272	-0.0665274	0.0837595	0.0558161	0.0751527	0.08388	0.0857583	0.0708526	0.0626491	0.0367905	0.0706065	0.0526546	0.0788685	0.0765637	0.0651381	0.0970834	-0.0995546	-0.0718041	0.0621913	0.053736	0.0887915	-0.0787519	0.0566552	0.0706955	0.097159	0.0774334	0.0504916	0.054167
Abi1:ENSMUST00000126112.7	-0.0546492	-0.00825975	-0.0246903	0.0281506	0.0171485	0.0382781	-0.0510722	0.00571507	-0.0342648	0.023779	0.00725944	0.034621	0.0549928	0.0298548	0.038696	0.0386682	0.020702	0.0437996	0.0222707	0.0309976	0.0307048	0.0404023	0.0319802	-0.0638279	-0.0382208	0.0483038	0.023564	0.0235948	-0.0090198	0.0423962	0.0275593	0.0423999	0.0277335	0.0293658	0.0299401
Amotl2:ENSMUST00000035121.13	-0.0619099	-0.0366092	-0.0558231	0.0561701	0.0355437	0.0483792	-0.0697698	0.0465044	-0.0645685	0.0455406	0.0557852	0.0303167	0.0289821	0.0385857	0.0104429	0.0185855	0.0317537	0.0582126	0.0326079	0.0375573	0.0316643	0.0322332	0.040894	-0.0562001	-0.0657052	0.0496987	0.0290226	0.0439221	-0.0189445	0.0560881	0.0408982	0.0331816	0.0398838	0.0339198	0.0485282
Elavl1:ENSMUST00000098950.5	-0.0245083	-0.0418163	-0.0439823	0.0288685	0.0225127	0.0358385	-0.040805	0.0116474	-0.0263905	0.023418	0.026733	0.0249499	0.0226511	0.0267835	0.0222651	0.0212346	0.0139619	0.0302016	0.0218067	0.0212318	0.0185982	0.0234687	0.0385254	-0.0214058	-0.0366587	0.038318	0.0180682	0.0302304	-0.0279699	0.0309523	0.0312675	0.0223478	0.0163253	0.0207932	0.0220911
Surf4:ENSMUST00000015011.9	-0.0142691	-0.0225559	-0.0117682	0.02053	0.00439676	0.0143552	-0.0389062	-0.0149317	-0.00388357	0.0233149	-0.00305637	0.0441365	0.0247151	0.0203985	0.0242057	0.00707153	0.00203319	0.029088	0.00556141	0.00992671	0.0330412	0.0272249	0.0283017	-0.028976	-0.0250874	0.0197052	0.00863767	0.0238225	-0.035795	0.0294121	0.0297829	0.0266643	0.0167943	0.0204101	0.0184247
Foxp4:ENSMUST00000113265.7	-0.0858052	-0.0257429	-0.0536551	0.0585896	0.0228171	0.0704791	-0.0948815	0.0366165	-0.0268032	0.0656536	0.0336096	0.0579862	0.0789473	0.0638624	0.0401415	0.046747	0.0164709	0.0448256	0.00888826	0.0292873	0.0329791	0.0464395	0.0581666	-0.0948282	-0.0609031	0.0339298	0.0286518	0.0674233	-0.0582542	0.0528333	0.0352355	0.0734198	0.0538346	0.0480023	0.0328431
Fbxo28:ENSMUST00000051431.9	-0.0162056	-0.0263927	-0.0288015	0.00846629	-0.00690026	0.0171199	-0.0235878	0.00289092	-0.0236236	0.00211425	0.0235185	0.00377387	0.00319763	0.0232549	0.00330729	-0.00374866	0.00711691	0.00236152	-0.00608728	0.00177045	0.0193764	0.0151624	0.00566028	-0.012497	-0.0270482	0.0109874	-0.0173381	0.00674267	-0.0187777	0.039015	0.016683	-0.0104453	-0.0015538	0.00959719	0.0276872
Fndc4:ENSMUST00000172435.7	-0.0696516	-0.0642166	-0.0653325	0.0715536	0.0666459	0.0736992	-0.0658681	0.0423142	-0.0901238	0.0541416	0.0510171	0.0460852	0.0441645	0.0666125	0.0482085	0.0636907	0.0455346	0.0738101	0.0475609	0.0549657	0.0489872	0.0591012	0.0741659	-0.0466964	-0.071898	0.060544	0.0379185	0.0555889	-0.0618108	0.0684816	0.0563196	0.0542571	0.0624013	0.0480261	0.0673436
Glud1:ENSMUST00000022322.16	-0.123267	-0.117678	-0.0975801	0.113176	0.0876654	0.131827	-0.12408	0.0830499	-0.127561	0.0888704	0.0929238	0.087226	0.0803698	0.116623	0.0849305	0.0634144	0.0923431	0.117128	0.0923227	0.103809	0.091177	0.0991687	0.14737	-0.0948092	-0.136391	0.131449	0.0813373	0.122323	-0.10758	0.120392	0.0948645	0.0884752	0.094671	0.0773184	0.109705
Pten:ENSMUST00000013807.7	-0.0126524	-0.0403962	-0.0307555	0.01459	0.0211264	0.0175588	-0.0562761	0.0126102	-0.0438825	0.0244678	0.00322048	0.0232453	0.0352279	0.0308158	0.0208759	0.0198647	0.0199893	0.0211209	0.0157995	0.0227996	0.0256446	0.0348964	0.0390956	-0.0262863	-0.0386429	0.0317333	0.0197887	0.0346743	-0.0392879	0.0449831	0.012351	0.0120873	0.0254927	0.0235526	0.036752
Mau2:ENSMUST00000168013.2	-0.0852221	-0.128855	-0.0936019	0.120734	0.0964754	0.148709	-0.061177	0.161146	-0.129733	0.0946669	0.180781	0.0199752	0.0867609	0.105529	0.0487485	0.041721	0.111578	0.103905	0.0796001	0.129119	0.0726365	0.0834751	0.155378	-0.0137539	-0.128767	0.0919733	0.0993243	0.103644	-0.0869876	0.102365	0.0981398	0.0643559	0.0902973	0.067856	0.105404
Mpped2:ENSMUST00000111063.7	-0.0556871	-0.0533862	-0.0486414	0.0580489	0.0386449	0.0596663	-0.0433436	0.0550265	-0.0750764	0.0353609	0.0683684	0.022017	0.0296669	0.0539383	0.0235719	0.0279277	0.0453306	0.0519948	0.0313344	0.0471987	0.0480653	0.0512261	0.0728097	-0.0371175	-0.0679054	0.0454049	0.0334074	0.0457638	-0.0288107	0.0696987	0.0411181	0.0291649	0.0403246	0.0435035	0.0720143
Ubxn6:ENSMUST00000019722.11	-0.0610574	-0.0432395	-0.0654348	0.0577008	0.0370717	0.0555425	-0.0273006	0.0258369	-0.0456304	0.0312168	0.0159463	0.0717666	0.0618022	0.048327	0.0524652	0.0519027	0.0400356	0.0307667	0.0300952	0.0264467	0.0514608	0.0437225	0.0632502	-0.0430507	-0.0496166	0.0433433	0.0551132	0.0704987	-0.0213638	0.0546607	0.0267219	0.0336198	0.0481434	0.0457096	0.0560929
Smc6:ENSMUST00000218866.1	-0.114485	-0.0954639	-0.0998892	0.104436	0.0809096	0.12284	-0.101457	0.144722	-0.123221	0.0649604	0.130044	0.0881626	0.0895791	0.0988786	0.1086	0.0906845	0.0886015	0.084633	0.0976518	0.141127	0.0933513	0.0855423	0.128485	-0.0884315	-0.119646	0.0837967	0.104027	0.107528	-0.11103	0.104863	0.109383	0.100655	0.107792	0.0811277	0.123455
Gclm:ENSMUST00000029769.13	-0.0816817	-0.0947113	-0.070612	0.082266	0.0399403	0.0713307	-0.0750682	0.0602437	-0.106875	0.0663514	0.0676511	0.0417139	0.0767078	0.0744152	0.0353629	0.000206286	0.0602759	0.056224	0.00359039	0.0583693	0.0761272	0.041378	0.072196	-0.0787509	-0.0992665	0.0445655	0.0498731	0.0675788	-0.0413821	0.0855976	0.0464049	0.0480098	0.053767	0.0359396	0.0837439
H4c8:ENSMUST00000102972.5	0.0681766	0.0623997	0.048363	-0.0554012	-0.0556537	-0.0585585	0.035514	-0.0704754	0.0816573	-0.0554815	-0.0487063	-0.0119995	-0.0747712	-0.0197024	-0.0431636	-0.0326463	-0.0452887	-0.0252637	-0.052866	-0.0659004	-0.0265445	-0.0261654	-0.085042	0.0765742	0.0616465	0.0191058	-0.0407543	-0.0512237	0.0484071	-0.0361718	-0.0510058	-0.047102	-0.0316755	-0.0557739	-0.0348565
Pabpn1:ENSMUST00000116476.8	0.00787227	0.0189217	0.0229261	-0.0218838	-0.0273422	-0.0244597	-0.0167135	-0.0448561	0.0173737	-0.00867816	-0.0287395	-0.0014119	-0.00981567	-0.00858986	-0.0188735	-0.0277252	-0.0297952	-0.0114192	-0.032248	-0.046844	-0.00295915	-0.0175836	-0.0199139	-0.0115759	0.00927336	-0.0127117	-0.020527	-0.0120958	-0.00784383	0.00534108	-0.0135131	-0.010794	-0.000978981	-0.0079828	-0.0163437
Yipf4:ENSMUST00000024873.6	0.0324824	0.035699	0.0297621	-0.0393545	-0.0400162	-0.0482731	0.0191502	-0.0512307	0.0470197	-0.032717	-0.0388157	-0.0180787	-0.0434646	-0.0370567	-0.0236602	-0.036592	-0.0343675	-0.0311935	-0.0462446	-0.0418718	-0.0196207	-0.0396216	-0.0389078	0.0291279	0.0350013	-0.0208256	-0.0225431	-0.0246913	0.0206554	-0.029752	-0.040944	-0.0365074	-0.0372921	-0.0381055	-0.0475565
Zfp442:ENSMUST00000109916.7	0.0560741	0.0282186	0.0171289	-0.0329372	-0.0509518	-0.0535871	0.0242112	-0.0411563	0.0532686	-0.0311611	-0.0556881	-0.0271414	-0.0092295	-0.0373467	-0.0584706	-0.0458884	-0.0330183	-0.0445888	-0.0390272	-0.0521243	-0.0281043	-0.0461199	-0.0501252	0.0112063	0.0579814	-0.0485909	-0.0433144	-0.0402487	0.01825	-0.041838	-0.0536588	-0.0240476	-0.0413016	-0.0353058	-0.0607931
Tle3:ENSMUST00000178113.7	0.0512157	0.00674577	0.028733	-0.0357751	-0.0366711	-0.0427058	0.0277555	-0.062602	0.0506451	-0.0190314	-0.0576921	-0.0154559	-0.0488918	-0.0347518	-0.0389695	-0.0517936	-0.0264357	-0.0539281	-0.0595919	-0.0583633	-0.0101109	-0.0446767	-0.0377807	0.0206683	0.0230757	-0.0360828	-0.037809	-0.0371925	0.0389114	0.00979644	-0.0104429	-0.0368896	-0.0305625	-0.00512838	-0.0180983
Tes3-ps:ENSMUST00000222404.1	0.0145435	0.0128806	0.0013106	-0.0121981	-0.0313915	-0.0143547	0.00657508	-0.0144469	0.0254786	-0.00279058	-0.0245927	-0.0026158	-0.00990945	-0.00501541	-0.0067243	-0.0205766	-0.0188261	-0.00708333	-0.0295116	-0.027257	-0.00331688	-0.0141853	-0.0093957	0.00189471	0.00602421	-0.019122	-0.0105594	-0.0142264	0.00969025	0.0116723	2.45917e-05	-0.00971314	-0.00975727	-0.0157049	-0.00196756
Wdr12:ENSMUST00000027173.14	-0.0113589	-0.00178005	-0.0265948	-0.00640201	0.00788865	0.000231618	-0.00994025	0.00859733	-0.019622	-0.00480996	-0.0137052	0.00429584	0.00449719	0.0060291	0.0119767	-0.00237952	0.00107547	-0.00493241	0.00772234	-0.00123279	-0.00237872	-0.0108931	0.0064034	-0.0157831	-0.00451125	0.0042629	-0.0043038	-0.0178832	-0.00885489	0.0117657	-0.00832898	-0.00402439	0.00276955	0.0146549	0.0100545
Ppt1:ENSMUST00000030412.10	-0.014309	-0.0266323	0.00504352	0.0293587	-0.0186462	-0.00200209	-0.0228643	-0.0388562	-0.0119021	0.00779052	-0.00335073	0.0354376	0.010161	0.0145786	0.0245335	-0.0396091	-0.0216849	-0.00726098	-0.0362702	-0.0280558	0.0289437	0.00105619	0.00533922	-0.0509562	-0.0359331	0.0332995	0.0058682	0.00796984	-0.0249206	0.0815135	0.0331571	0.00736004	0.0286469	0.024201	0.0243166
Ryk:ENSMUST00000035142.7	-0.00632252	-0.0259492	-0.0104575	-0.00170628	0.00986237	-0.0108891	-0.00905378	0.00798631	-0.0188559	0.0135536	0.00147047	0.0342172	0.0104852	0.0136622	0.0151025	-0.00586441	0.00566599	0.01473	0.00885125	0.00710779	0.0115524	0.00223767	0.00884659	-0.0207761	-0.000995589	0.0214596	0.0062255	0.0164318	-6.82009e-05	0.0170559	0.0298071	0.00946637	0.0226833	0.00356516	0.00333531
Psmd10:ENSMUST00000112978.1	-0.0950325	-0.0718547	-0.0803858	0.091981	0.0813389	0.0907125	-0.0824037	0.0899862	-0.0778304	0.0621108	0.0788164	0.0601033	0.083925	0.0883316	0.0670233	0.0996638	0.0724222	0.0729854	0.0738691	0.10685	0.0550562	0.0745576	0.106232	-0.0599172	-0.0835346	0.0766514	0.0709168	0.0881801	-0.0756649	0.0389727	0.0767604	0.0839157	0.0891655	0.0569754	0.0637654
3110040N11Rik:ENSMUST00000026092.8	-0.115703	-0.0864341	-0.0879247	0.113531	0.0951387	0.128056	-0.10059	0.10982	-0.110372	0.07674	0.088781	0.0745258	0.0927699	0.118188	0.0853972	0.11606	0.096055	0.115508	0.112944	0.132624	0.084999	0.10638	0.126096	-0.0817012	-0.108941	0.107984	0.0901437	0.114351	-0.0706067	0.0856508	0.0912442	0.097015	0.089564	0.0987757	0.111828
Nfix:ENSMUST00000076715.12	-0.0981893	-0.0895806	-0.0542452	0.0890815	0.0813122	0.105643	-0.0919866	0.0564552	-0.100231	0.0721035	0.0959245	0.0613449	0.0643227	0.0925092	0.0692866	0.0568085	0.0677013	0.0989672	0.0501844	0.0788552	0.064606	0.0836869	0.118249	-0.0518893	-0.101948	0.0930598	0.0705463	0.0883951	-0.118502	0.107997	0.0786659	0.0692119	0.0715189	0.0693308	0.119193
Cdkn1b:ENSMUST00000067327.10	-0.0967453	-0.0568364	-0.0689866	0.0697619	0.0600601	0.0804133	-0.0726988	0.0947487	-0.0903823	0.0658007	0.0556309	0.0592929	0.0821895	0.0658623	0.0702121	0.0868832	0.0568817	0.0737408	0.0426628	0.0976674	0.0574757	0.0597809	0.127672	-0.0771718	-0.0772001	0.0392889	0.0703268	0.0587917	-0.0523484	0.0734443	0.066308	0.0892689	0.0696955	0.0520074	0.0750136
Celf1:ENSMUST00000068726.12	-0.145897	-0.0494857	-0.0948087	0.110433	0.0936049	0.124925	-0.0919167	0.0974074	-0.130499	0.0843131	0.0917846	0.0648887	0.095051	0.112408	0.0967657	0.115038	0.0886258	0.106195	0.0997232	0.10753	0.0855211	0.0914592	0.131695	-0.0953045	-0.110248	0.103539	0.0965778	0.105635	-0.0721985	0.0724546	0.102836	0.0938924	0.101238	0.0885075	0.089416
Caprin1:ENSMUST00000028607.12	-0.0541488	-0.041793	-0.0577897	0.0602492	0.0401889	0.0599428	-0.0467639	0.0337615	-0.0606576	0.0380626	0.0432423	0.0301283	0.0401276	0.0594464	0.0400578	0.0415897	0.031325	0.0496462	0.039961	0.0575267	0.0421433	0.0470626	0.061905	-0.0487419	-0.0626344	0.0631183	0.0308667	0.041766	-0.0407396	0.0491977	0.0382853	0.0422667	0.0554741	0.0449118	0.0574183
Lsm12:ENSMUST00000107156.8	-0.122201	-0.0657362	-0.100995	0.123218	0.104892	0.122819	-0.0892829	0.106393	-0.115042	0.0813911	0.112209	0.0664753	0.0973477	0.115139	0.0907787	0.130468	0.0763206	0.104973	0.116597	0.125549	0.0645531	0.0944032	0.144537	-0.0829535	-0.0880231	0.0989769	0.0987265	0.106147	-0.0794326	0.0646121	0.102933	0.1159	0.11053	0.0944003	0.0887635
Echs1:ENSMUST00000026538.12	-0.130451	-0.0703336	-0.0933764	0.102587	0.100433	0.125309	-0.0731748	0.093746	-0.109105	0.0702225	0.0801667	0.0643229	0.099378	0.10805	0.0802267	0.120755	0.0943363	0.100264	0.0856813	0.0882962	0.0830431	0.0949991	0.134421	-0.0976076	-0.110123	0.0937542	0.0924216	0.108745	-0.04556	0.077685	0.098684	0.0847013	0.102376	0.0754291	0.0928816
Cryzl1:ENSMUST00000073466.12	-0.129796	-0.0360076	-0.0760271	0.0944285	0.0674867	0.0961878	-0.0890393	0.0660561	-0.0824588	0.0589926	0.094209	0.0779269	0.0837304	0.0941937	0.0929532	0.112903	0.0562784	0.0912125	0.0887205	0.0786411	0.065228	0.0825709	0.123315	-0.0964224	-0.0791808	0.0943816	0.0766446	0.108429	-0.0771006	0.0519657	0.09063	0.101165	0.104517	0.0886599	0.0765546
Calm1:ENSMUST00000110082.10	-0.213274	-0.0795915	-0.122953	0.14243	0.127489	0.172974	-0.151021	0.0910217	-0.169838	0.121847	0.119726	0.0864185	0.166551	0.143205	0.108195	0.138924	0.10381	0.148818	0.101107	0.135622	0.119587	0.150112	0.199775	-0.145045	-0.177888	0.150481	0.118064	0.127724	-0.0732359	0.119973	0.140408	0.137234	0.134218	0.128783	0.146945
Snx2:ENSMUST00000037850.6	-0.259244	-0.11821	-0.168422	0.183693	0.165379	0.223989	-0.189446	0.159247	-0.194637	0.132854	0.170188	0.155477	0.187958	0.197507	0.172641	0.205964	0.121867	0.19514	0.180614	0.183323	0.156259	0.181154	0.250188	-0.171944	-0.203583	0.191779	0.172616	0.190069	-0.116517	0.132099	0.207532	0.206675	0.20438	0.153227	0.159995
Gsk3b:ENSMUST00000023507.12	-0.0271141	-0.0377748	-0.0380781	0.019728	0.0191315	0.0341471	-0.0444883	0.0212188	-0.0339332	0.0169584	0.0191851	0.0262061	0.0126628	0.0138942	0.0197199	0.0324399	0.0205848	0.0373127	0.0208464	0.028102	0.0138605	0.0222887	0.0387738	-0.0273948	-0.0465365	0.0342033	0.0152628	0.0278575	-0.0321707	0.0434036	0.0204666	0.0211048	0.0380615	0.026553	0.046395
Zcchc14:ENSMUST00000046386.4	-0.0482258	-0.0476159	-0.0412644	0.0255545	0.0416588	0.0643276	-0.0450033	0.0258298	-0.0458577	0.0328915	0.0265517	0.0341639	0.0364429	0.0376898	0.0287754	0.0282089	0.0285352	0.0481823	0.0195022	0.0473663	0.0269035	0.0461817	0.0454441	-0.0284941	-0.0554717	0.0557967	0.0255996	0.0525523	-0.0225655	0.0560842	0.0185316	0.0335838	0.0511305	0.0537668	0.0717724
Asrgl1:ENSMUST00000049948.5	-0.119656	-0.103853	-0.123277	0.127191	0.0893308	0.137082	-0.104812	0.120834	-0.141024	0.0884733	0.114771	0.064696	0.0934641	0.124877	0.072193	0.0737819	0.0939474	0.125842	0.0920994	0.123286	0.0954713	0.0905373	0.137999	-0.0946054	-0.159391	0.1064	0.0758832	0.110894	-0.106468	0.114021	0.112637	0.0959009	0.113426	0.0935817	0.1113
Sgce:ENSMUST00000133306.7	-0.311854	-0.264146	-0.256369	0.304255	0.241977	0.346264	-0.270703	0.244394	-0.345258	0.23421	0.254161	0.213791	0.247263	0.304329	0.238896	0.227958	0.249682	0.300913	0.248291	0.30572	0.245587	0.245186	0.365676	-0.24414	-0.334084	0.270279	0.221689	0.292489	-0.216942	0.266509	0.261421	0.26106	0.255699	0.241062	0.29094
Zfp251:ENSMUST00000080406.6	-0.103484	-0.0798007	-0.0846167	0.0914943	0.0862503	0.107695	-0.085829	0.0843054	-0.121759	0.062651	0.0761571	0.0783247	0.0841809	0.100781	0.0820634	0.0989688	0.0699242	0.0982861	0.0837441	0.0930933	0.0754712	0.0989763	0.119282	-0.0585975	-0.104146	0.103624	0.0697495	0.0889223	-0.0922806	0.103254	0.0865138	0.0848012	0.0960078	0.0828604	0.119176
Hsdl2:ENSMUST00000030078.11	-0.0592083	-0.0590316	-0.0588082	0.0672014	0.0676907	0.0809644	-0.0718884	0.05128	-0.0850595	0.0511472	0.0761159	0.0343526	0.00159702	0.0746483	0.0531482	0.0274659	0.0846247	0.0608915	0.0643318	0.0603719	0.0664877	0.0512266	0.0901764	-0.0445815	-0.0922068	0.0595497	0.0475709	0.0651748	-0.0469853	0.0801941	0.0494816	0.0442671	0.0543656	0.0581949	0.0738794
Pcyox1l:ENSMUST00000025472.6	-0.0598723	-0.0637098	-0.0687643	0.0717437	0.0929634	0.0977674	-0.0651952	0.0875059	-0.106062	0.0698724	0.0753252	0.052274	0.0669261	0.109206	0.0579674	0.0388962	0.0779146	0.0964249	0.0822268	0.0905483	0.0659831	0.0712622	0.11005	-0.0609494	-0.0895842	0.086825	0.0876526	0.0769644	-0.0324911	0.0693588	0.0985546	0.0712386	0.0806083	0.0564298	0.0839272
Fcho1:ENSMUST00000093444.12	-0.213053	-0.153536	-0.169082	0.184186	0.161372	0.220133	-0.160274	0.174187	-0.210781	0.1554	0.177291	0.138743	0.169859	0.170978	0.14418	0.17613	0.142147	0.165883	0.149941	0.218189	0.15178	0.161804	0.217165	-0.142908	-0.188635	0.154287	0.154342	0.178601	-0.169442	0.175261	0.142708	0.156141	0.145672	0.170488	0.190332
Zfp41:ENSMUST00000054555.9	-0.132229	-0.0972128	-0.11975	0.124703	0.106564	0.148659	-0.124187	0.111403	-0.135409	0.107281	0.100092	0.0999903	0.105271	0.10861	0.115547	0.109553	0.095697	0.1267	0.108383	0.135036	0.102576	0.119941	0.150062	-0.0955449	-0.133965	0.104191	0.0967775	0.127753	-0.0957643	0.0982102	0.105794	0.105733	0.100448	0.116311	0.117485
Xrn2:ENSMUST00000028921.5	-0.0925541	-0.0310239	-0.0611423	0.0510996	0.0691241	0.0809138	-0.0643022	0.0471495	-0.0900923	0.0533984	0.0865305	0.00071898	0.0563515	0.064874	0.0130435	0.0314348	0.0637351	0.0511918	0.0924962	0.0564743	0.0141682	0.0589139	0.0678076	-0.0408718	-0.070232	0.0606589	0.0597228	0.0573766	-0.0622391	0.0180632	0.0644063	0.0633124	0.0333143	0.0287861	0.0601777
Set:ENSMUST00000102866.9	-0.0479714	-0.0371813	-0.0475334	0.0485638	0.0468243	0.0601561	-0.0456013	0.0430424	-0.057191	0.0223968	0.0275204	0.029836	0.0270956	0.048571	0.0351257	0.0460132	0.0342587	0.0466827	0.0561971	0.0542536	0.0258312	0.0394366	0.0606367	-0.0346291	-0.0589529	0.0540393	0.0406357	0.0451534	-0.0185954	0.0382789	0.0385273	0.0404076	0.0382561	0.0478725	0.0485375
Ndufb5:ENSMUST00000127477.7	-0.106176	-0.0288326	-0.0809116	0.0804709	0.090681	0.0915917	-0.0762045	0.0238259	-0.0753483	0.0487871	0.0789905	0.0789145	0.0685405	0.0978024	0.11712	0.0965843	0.0574402	0.0860676	0.106139	0.0552813	0.0480811	0.0838937	0.101215	-0.0718534	-0.0766619	0.108204	0.0815852	0.0747121	-0.0212962	0.0530903	0.0953231	0.0825	0.0813705	0.0710286	0.07527
Nell2:ENSMUST00000166170.8	-0.155886	-0.0265827	-0.0631815	0.0596099	0.0335399	0.0869402	-0.106885	0.000436247	-0.0629268	0.0484709	0.0951161	0.0415769	0.0406298	0.0727212	0.0355511	0.0716606	0.0175608	0.0612021	0.00799785	-0.0112888	0.0419197	0.0794817	0.0912306	-0.08748	-0.103164	0.0846168	0.0510816	0.072273	-0.078533	0.102907	0.0737717	0.0790845	0.0720193	0.0663612	0.083762
H3c8:ENSMUST00000080859.7	-0.117561	-0.0699772	-0.124414	0.052744	0.108251	0.0682238	-0.0878722	0.0789425	-0.0759177	0.0442564	-0.0473698	0.0660481	0.0852737	0.059849	0.0579862	0.0861781	0.0325119	0.0463715	0.174957	0.145312	-0.0101079	0.042742	0.0800702	-0.0429751	-0.0545917	0.00634586	0.0632238	0.0620283	-0.0372337	0.0184962	0.0525272	0.078959	0.0364673	0.0608308	0.0375921
Cab39:ENSMUST00000113360.7	-0.0481765	-0.0334462	-0.0439294	0.0463301	0.0428461	0.0525839	-0.0343686	0.0567025	-0.071899	0.0523862	0.0288947	0.0346703	0.0557279	0.030486	0.0311187	0.0422866	0.0414675	0.036642	0.0219637	0.0675083	0.042864	0.0406863	0.0538977	-0.042362	-0.0596156	0.0449558	0.0309612	0.0440773	-0.0431463	0.0493911	0.0338225	0.0387844	0.0372032	0.0438003	0.0569862
Snx10:ENSMUST00000049152.14	-0.0770764	-0.045803	-0.0647514	0.0553615	0.0355734	0.0575983	-0.0507553	0.031714	-0.0604924	0.062552	0.0321416	0.0051529	0.0455241	0.0540321	0.0380732	0.0550526	0.0463992	0.0495431	0.0194178	0.0408326	0.0537433	0.0439791	0.0852604	-0.0344339	-0.0639679	0.0532052	0.025081	0.0336673	-0.0505401	0.0608752	0.0429754	0.0516708	0.0486098	0.0465558	0.0357194
Pcmt1:ENSMUST00000159917.7	-0.0909703	-0.0520944	-0.0685773	0.0848593	0.0713334	0.0858642	-0.0749648	0.0504052	-0.0989511	0.0497027	0.056441	0.0506805	0.0638027	0.0754773	0.0747526	0.0559515	0.0561712	0.0775672	0.0569654	0.0761522	0.0534831	0.0676485	0.0862582	-0.0822266	-0.0843535	0.067801	0.0502896	0.0597042	-0.0500321	0.0871837	0.0563874	0.0685177	0.0715163	0.0602587	0.0858374
Mospd1:ENSMUST00000096447.8	-0.0594618	-0.0325706	-0.0588033	0.0527254	0.0325155	0.0612649	-0.0478175	0.0479361	-0.0523742	0.0284235	0.0494122	0.0223823	0.0567377	0.0474691	0.0390939	0.0496922	0.0391245	0.0517125	0.0121058	0.0506032	0.0414236	0.0386653	0.0780767	-0.0442292	-0.0616968	0.0453835	0.040166	0.0361922	-0.014894	0.0471246	0.0482374	0.0427672	0.0329296	0.0367316	0.0607961
Ppp3cb:ENSMUST00000159027.7	-0.0745104	-0.0769457	-0.080398	0.0648542	0.0557757	0.0855556	-0.0751223	0.0558823	-0.0873287	0.0528225	0.0490189	0.045513	0.0625886	0.0683755	0.0434437	0.0653316	0.033406	0.0654109	0.0499079	0.069135	0.0536504	0.0695962	0.102289	-0.0705295	-0.0875598	0.065431	0.0451246	0.0631813	-0.0657872	0.0998688	0.0482038	0.0525442	0.0447879	0.0460776	0.0870813
Ppp2r3c:ENSMUST00000021410.9	-0.0794707	-0.0500243	-0.052398	0.0670267	0.0574277	0.0604356	-0.0652746	0.0406118	-0.0666658	0.0452834	0.0502307	0.0518043	0.0557329	0.0585871	0.0460591	0.0528054	0.0538765	0.0599565	0.0486218	0.0501588	0.0489776	0.041561	0.0677409	-0.0663438	-0.0720076	0.0613195	0.0347797	0.0478401	-0.0531973	0.0565498	0.0542055	0.0559178	0.0565615	0.0616759	0.0677541
Nr2f2:ENSMUST00000032768.14	-0.0320981	-0.0144433	-0.00839924	0.00496143	-0.00286927	0.000184032	-0.015479	0.0255051	-0.0260558	0.0174857	0.00555781	-0.00205421	-0.0115668	0.0187232	0.00954916	0.00743753	0.0127698	0.012646	-0.00931113	0.0147983	0.0127708	0.0109875	0.0102303	-0.0220485	-0.0192471	0.0264629	-0.0159445	0.03041	0.00347752	0.0261492	0.0163589	-0.00293741	0.003537	0.0134659	0.00989386
Ykt6:ENSMUST00000002818.8	-0.0884246	-0.0376742	-0.0458328	0.0580435	0.0382598	0.0367238	-0.080957	0.0238869	-0.0654012	0.0493555	0.00801102	0.0715883	0.0824526	0.0430083	0.0561046	0.0498898	0.0158466	0.0322078	0.0211225	0.0503422	0.0496843	0.0455317	0.0777925	-0.0996729	-0.0628896	0.0381046	0.0190973	0.0505636	-0.0649012	0.0632407	0.0484393	0.0711564	0.0883254	0.0623032	0.0660042
Ube2w:ENSMUST00000117146.8	-0.0295066	-0.00880967	-0.00650747	0.0186431	0.0108977	0.0222377	-0.0190251	0.0128176	-0.019221	0.0167237	0.0150255	0.00523469	-0.00383199	0.015554	0.00890342	0.0133723	0.0187556	0.0079173	0.0193737	0.00640006	0.0107177	0.0112817	0.0144625	-0.0314029	-0.0105071	0.0237025	0.0123757	0.0051068	-0.0111315	0.0126273	0.0352347	0.0126005	0.0199087	0.0284563	0.0282204
Qk:ENSMUST00000042296.8	-0.17626	-0.254702	-0.202167	0.253359	0.154407	0.245434	-0.160406	0.196853	-0.280252	0.166703	0.204499	0.111948	0.144823	0.243372	0.136872	0.10281	0.208841	0.196812	0.154561	0.223272	0.176713	0.112435	0.300881	-0.209288	-0.321366	0.155214	0.155693	0.226092	-0.168086	0.20051	0.17788	0.155081	0.175752	0.154017	0.173269
Arglu1:ENSMUST00000048545.9	-0.0318353	-0.037337	-0.044305	0.0247301	0.0216432	0.0382272	-0.0344873	0.0398883	-0.0438373	0.0291565	0.0583586	0.0204008	0.0344413	0.0311954	0.00857967	0.0472822	0.0144706	0.029917	-0.00641361	0.0560624	0.0367221	0.0165475	0.0327857	-0.0412905	-0.0414323	0.0330021	0.0233992	0.0193143	-0.0437966	0.0254489	0.0296944	0.0263533	0.0326781	0.01679	0.0248005
Tmx4:ENSMUST00000038228.10	-0.0452537	-0.0396193	-0.0373356	0.0407849	0.0260885	0.0332212	-0.0134021	0.0600945	-0.0346916	0.049027	0.0658937	0.0485547	0.0625809	0.0359134	0.0289816	0.0441022	0.0441382	0.0466593	0.0137588	0.0767848	0.0644753	0.0546324	0.0654821	-0.0169948	-0.0392695	0.0286334	0.038411	0.0420852	-0.0442579	0.0224797	0.018248	0.0421072	0.0379164	0.0480659	0.0535737
Soga3:ENSMUST00000092629.3	-0.0606909	-0.040202	-0.0426111	0.048117	0.0293136	0.0594141	-0.00919357	0.11712	-0.0416515	0.0362289	0.0369959	0.0507383	0.0834103	0.0384487	0.0485004	0.0808197	0.0334719	0.0369287	0.0157902	0.107484	0.0561006	0.0515945	0.06858	-0.0614769	-0.028215	0.0227491	0.0434124	0.057408	-0.0299983	0.023409	0.0341004	0.0302654	0.0445677	0.0481889	0.0468949
Drg2:ENSMUST00000018568.3	-0.100712	-0.098115	-0.104001	0.0994697	0.0715274	0.101888	-0.0696039	0.1026	-0.102279	0.0769786	0.0703916	0.0779886	0.0959592	0.092507	0.0760339	0.0925194	0.0805119	0.0804563	0.0812761	0.0989804	0.0652398	0.0805374	0.101279	-0.0800583	-0.0972221	0.0633815	0.0574596	0.0896082	-0.0233464	0.0713137	0.0847478	0.0722502	0.091629	0.0827377	0.0785123
Aars:ENSMUST00000034441.7	-0.126103	-0.14199	-0.11826	0.160847	0.130689	0.170823	-0.0977447	0.151193	-0.167036	0.105294	0.153803	0.0850803	0.105531	0.15031	0.100481	0.103035	0.125361	0.156036	0.159557	0.175233	0.0950271	0.121091	0.183332	-0.0675397	-0.144224	0.160831	0.129482	0.132839	-0.112882	0.0837241	0.125583	0.118584	0.133767	0.120935	0.127138
Rab5b:ENSMUST00000000727.3	-0.0788682	-0.0952462	-0.107343	0.0835636	0.0840278	0.11556	-0.0798579	0.0913933	-0.128966	0.0658186	0.0836241	0.0525408	0.0712936	0.117297	0.0596775	0.0530975	0.0907767	0.0815241	0.0929468	0.121583	0.0695389	0.0824984	0.10821	-0.0418151	-0.116811	0.0647002	0.0796758	0.0845787	-0.0565811	0.0938698	0.0722678	0.0661229	0.0711254	0.0624302	0.0922491
Cbx3:ENSMUST00000114445.7	-0.0678544	-0.106589	-0.0917229	0.102523	0.0560837	0.113354	-0.0764119	0.107656	-0.132322	0.0705652	0.101634	0.037854	0.0613084	0.0728636	0.0388213	0.0576429	0.0850369	0.0872654	0.0480975	0.102949	0.0730278	0.0652028	0.106727	-0.0475429	-0.115897	0.065642	0.0683429	0.0712103	-0.064305	0.0944621	0.0634202	0.0553922	0.0719903	0.0556297	0.103281
Rbfox2:ENSMUST00000171751.9	-0.035843	-0.0474515	-0.0364967	0.045884	0.0319482	0.0526478	-0.0358553	0.0361948	-0.0573359	0.0286487	0.0389064	0.0224795	0.0393381	0.0363711	0.0223217	0.0409995	0.0312802	0.0589512	0.0294949	0.0505461	0.0335531	0.0369769	0.0549871	-0.0185006	-0.0543281	0.0451044	0.0404691	0.0415013	-0.0287036	0.0423799	0.0290901	0.0228163	0.0368196	0.0315533	0.074024
Eid2b:ENSMUST00000094651.3	-0.11287	-0.101575	-0.136596	0.111583	0.114518	0.152024	-0.10872	0.101263	-0.154218	0.084075	0.112736	0.0882316	0.0844074	0.120812	0.0867151	0.101383	0.116558	0.143324	0.121254	0.146398	0.068153	0.12402	0.137413	-0.0797198	-0.140556	0.1457	0.0942647	0.102574	-0.0982674	0.107853	0.0854358	0.0968498	0.100234	0.0991824	0.154593
Lrrc58:ENSMUST00000078717.6	-0.11774	-0.112344	-0.119151	0.122414	0.119871	0.158605	-0.103447	0.101033	-0.165879	0.096788	0.112488	0.0770741	0.0748432	0.112308	0.071645	0.0874708	0.109168	0.127357	0.103664	0.129691	0.0933786	0.115872	0.140036	-0.075209	-0.145043	0.109227	0.0884072	0.107822	-0.0981239	0.13759	0.0912031	0.0752562	0.0887237	0.0982046	0.165396
Zcchc3:ENSMUST00000099207.4	-0.041947	-0.0490505	-0.0394183	0.0567567	0.0427006	0.0827574	-0.0383065	0.0625721	-0.0866834	0.0400007	0.0612796	0.0137155	0.0451168	0.0675054	0.0505525	0.0344444	0.0595113	0.0605162	0.0615793	0.0828188	0.0248005	0.052913	0.0720262	-0.0166069	-0.063644	0.059722	0.0526854	0.0515931	-0.043815	0.0174715	0.0505272	0.0454498	0.0483318	0.0497585	0.018973
Twf1:ENSMUST00000023087.12	-0.0232882	-0.033888	-0.0257309	0.029721	0.0218729	0.0375067	-0.0184613	0.0393291	-0.0407796	0.017891	0.0332567	0.01504	0.0282621	0.0277577	0.0077668	0.0180734	0.0451372	0.0322312	0.0123431	0.0413189	0.0166676	0.0155241	0.0347016	-0.0134271	-0.0401985	0.0178789	0.015044	0.017705	-0.0224054	0.0225472	0.0226632	0.00466923	0.0145596	0.0217133	0.0322746
Csnk2a1:ENSMUST00000099224.9	-0.0737905	-0.0720153	-0.0746439	0.0806066	0.089555	0.101439	-0.0643091	0.0745947	-0.102579	0.0656638	0.074077	0.0481098	0.0653229	0.0748518	0.0525767	0.07795	0.079259	0.0853602	0.075195	0.0976669	0.0535507	0.0751459	0.0922912	-0.0410095	-0.0985478	0.0677279	0.0630696	0.0705807	-0.058637	0.083272	0.0701922	0.0592987	0.0675489	0.0745159	0.0970428
Irf2bpl:ENSMUST00000038422.7	-0.0806135	-0.0711236	-0.0807752	0.0927128	0.0710521	0.105432	-0.0772589	0.0838877	-0.113549	0.0618782	0.0950524	0.0488409	0.0800952	0.0825191	0.0530298	0.0675399	0.0731446	0.0888786	0.0579036	0.0991812	0.0692715	0.0764514	0.103296	-0.0527202	-0.106976	0.0809082	0.0674143	0.0864772	-0.0532856	0.0930292	0.0689634	0.0612268	0.0621615	0.0817665	0.112217
Ythdf2:ENSMUST00000152796.7	-0.119815	-0.0970178	-0.107055	0.120889	0.107432	0.14763	-0.0818623	0.130691	-0.14906	0.084991	0.139216	0.0503733	0.088992	0.114171	0.074511	0.0846391	0.104952	0.113199	0.104338	0.141349	0.0861378	0.109565	0.132551	-0.067859	-0.131606	0.117023	0.0911999	0.0979472	-0.0823141	0.0905385	0.0949307	0.0810443	0.082451	0.0874228	0.120963
Efnb2:ENSMUST00000001319.14	-0.0212867	-0.0257306	-0.021301	0.0237478	0.0226841	0.0262963	-0.0365916	0.0442055	-0.0243641	0.00499649	0.0267942	0.00581639	0.0255371	0.0269034	0.0153565	0.0288055	0.0281545	0.0407745	0.00134949	0.0279723	0.0320653	0.0306897	0.0476482	-0.0212619	-0.0426491	0.0248809	0.0223805	0.024795	-0.0328519	0.0343346	0.0228719	0.0163602	0.0151009	0.0298025	0.0380206
Gm20521:ENSMUST00000134077.1	-0.0855303	-0.0603283	-0.0589162	0.0794297	0.0589293	0.0881765	-0.0854738	0.0652174	-0.0838076	0.062559	0.0709356	0.0625755	0.0800098	0.0836106	0.062266	0.0657536	0.0563021	0.0857958	0.0618949	0.0748573	0.0720491	0.0671743	0.10096	-0.0609436	-0.0816419	0.0752553	0.071259	0.08362	-0.071286	0.0632326	0.0712893	0.0803681	0.0812432	0.0702384	0.0702201
Ptpn2:ENSMUST00000122412.1	-0.147204	-0.114067	-0.115704	0.147425	0.107511	0.160443	-0.116674	0.133776	-0.14826	0.0944685	0.108112	0.0962955	0.11857	0.128045	0.0991696	0.135751	0.0999561	0.147564	0.140643	0.146607	0.102245	0.111675	0.161751	-0.114208	-0.149769	0.123307	0.111073	0.133719	-0.086988	0.0785885	0.129385	0.11359	0.122014	0.0879628	0.122622
Bmerb1:ENSMUST00000056521.11	-0.054485	-0.0333151	-0.0523261	0.0380744	0.0141737	0.0518613	-0.0789822	0.0293562	-0.043728	0.0321715	0.0128383	0.0602061	0.0654355	0.0569266	0.0467657	0.0611183	0.0192096	0.038311	0.0334721	0.044925	0.0455137	0.0536763	0.0577931	-0.0528036	-0.0520369	0.0424736	0.0335921	0.0527154	-0.0515269	0.053617	0.0276455	0.0445752	0.0569029	0.042967	0.0587162
Cirbp:ENSMUST00000105365.8	-0.103949	-0.078393	-0.118426	0.088372	0.0791202	0.108323	-0.0959051	0.0494146	-0.114619	0.0708176	0.0694583	0.0742668	0.0677637	0.0811475	0.0739524	0.0778029	0.065973	0.0837423	0.0680354	0.0800281	0.0645539	0.0827468	0.10856	-0.0828642	-0.114059	0.0957617	0.0665633	0.0726908	-0.0756864	0.107284	0.0816381	0.0781876	0.0724586	0.0768449	0.114445
Akirin1:ENSMUST00000102636.3	-0.0692525	-0.05873	-0.0685305	0.0665108	0.0487599	0.0757649	-0.0632223	0.0584957	-0.0727555	0.0396955	0.0682195	0.0447259	0.0587952	0.0708004	0.0655921	0.0414096	0.0464482	0.0557855	0.0388172	0.0622762	0.0571839	0.0685398	0.0829943	-0.0616323	-0.0830046	0.0579983	0.0491116	0.0710454	-0.0466265	0.0692703	0.0650896	0.0582603	0.0637149	0.0494447	0.0669149
Arrdc3:ENSMUST00000099356.9	-0.0993933	-0.0959834	-0.101595	0.0768559	0.0651608	0.0933976	-0.0949464	0.0598526	-0.115523	0.0562901	0.074648	0.0563282	0.0709284	0.0857023	0.0663393	0.060029	0.0604495	0.0755327	0.0354928	0.0635252	0.0774253	0.0614381	0.0897151	-0.066093	-0.0963762	0.0716299	0.0465715	0.0843451	-0.0806455	0.102741	0.0714053	0.0577917	0.0707257	0.0644707	0.0863935
Slc48a1:ENSMUST00000117892.1	-0.10856	-0.0856634	-0.0877252	0.0903414	0.0789958	0.102226	-0.102537	0.0704056	-0.109246	0.0643484	0.0769695	0.0810876	0.0971484	0.0887956	0.0776192	0.0659903	0.0724668	0.0799087	0.0664277	0.0997752	0.0763398	0.0727625	0.110229	-0.0687588	-0.10054	0.0701278	0.0535201	0.0950361	-0.094658	0.10213	0.0669672	0.0681541	0.0855438	0.0697455	0.0898558
Sbds:ENSMUST00000026387.10	-0.0700733	-0.0769018	-0.0776291	0.0855998	0.0602075	0.0824621	-0.0686028	0.0350196	-0.0878648	0.047766	0.0457158	0.0477272	0.0465233	0.0730538	0.0524328	0.0521558	0.0440403	0.0613179	0.0507535	0.0617776	0.0548963	0.0574668	0.0791301	-0.0687118	-0.0842912	0.0638242	0.0479996	0.071579	-0.0596861	0.0778949	0.0728575	0.0357239	0.0524965	0.0496009	0.0737785
Gmcl1:ENSMUST00000001185.13	-0.136683	-0.0740138	-0.094509	0.0995448	0.0786051	0.0947172	-0.109288	0.0674344	-0.103196	0.0819067	0.0754383	0.0975702	0.0979852	0.0832099	0.0749139	0.0989614	0.0438072	0.080335	0.0694332	0.0863907	0.0623351	0.0957083	0.10951	-0.113325	-0.110741	0.097922	0.0720485	0.100991	-0.0873351	0.0897992	0.0845898	0.100091	0.0939501	0.0661472	0.0850897
Alg14:ENSMUST00000039442.11	-0.0590706	-0.0686685	-0.0451233	0.0681183	0.0503462	0.0763363	-0.0780133	0.027775	-0.0837837	0.0510691	0.0530609	0.0439806	0.0257164	0.0570423	0.0404064	0.0285317	0.0353801	0.0545731	0.0491637	0.0526909	0.0428841	0.0485197	0.0688777	-0.0558359	-0.0986752	0.055527	0.0280296	0.055754	-0.0659071	0.0844311	0.0460225	0.0339772	0.0533168	0.0555194	0.0497527
Ptn:ENSMUST00000101534.4	-0.0926203	-0.0648253	-0.0959517	0.0921245	0.0646631	0.0962496	-0.090382	0.0659729	-0.124896	0.0874224	0.0859482	0.0712434	0.106296	0.0908919	0.0626478	0.0582842	0.0770372	0.0820432	0.0416	0.0861402	0.0934066	0.0777466	0.110964	-0.104946	-0.121348	0.0768929	0.0537231	0.0728836	-0.0468138	0.0858617	0.0586125	0.062802	0.0731135	0.0678499	0.0969597
Celf2:ENSMUST00000170438.7	-0.0398304	-0.0464538	-0.0402873	0.0408137	0.0364523	0.0485452	-0.0369677	0.0298996	-0.0387564	0.0343655	0.0368636	0.0338855	0.0383984	0.0336007	0.0203148	0.0336388	0.0311217	0.0358705	0.0211829	0.0369928	0.0341129	0.0372797	0.0574743	-0.0193689	-0.0456814	0.0367768	0.0287093	0.0462564	-0.0505359	0.0427855	0.0313726	0.0266552	0.030801	0.0397241	0.0509544
Pea15a:ENSMUST00000013842.11	-0.098117	-0.107647	-0.111227	0.109176	0.0648002	0.12413	-0.102039	0.0695366	-0.142291	0.0825691	0.0966764	0.0567314	0.0458811	0.110272	0.0557428	0.037885	0.0887599	0.08445	0.0594381	0.0857872	0.0745021	0.062718	0.125287	-0.0906881	-0.150158	0.0845506	0.0757206	0.0928833	-0.0858332	0.1501	0.0966894	0.0585989	0.0698012	0.0808922	0.11825
Mlx:ENSMUST00000107302.7	-0.0655511	-0.0547783	-0.0630187	0.0826835	0.0541016	0.0738282	-0.0745526	0.0309527	-0.0772161	0.0415349	0.0536833	0.0610841	0.0453025	0.0564511	0.0475427	0.0503955	0.0448725	0.0468057	0.0581564	0.0457606	0.0523961	0.0381626	0.065822	-0.0570117	-0.073662	0.062168	0.0340742	0.0451044	-0.071361	0.0588248	0.0273723	0.0398265	0.0495142	0.0596532	0.0731198
Mex3b:ENSMUST00000082237.6	-0.0632653	-0.0798774	-0.0721201	0.0585998	0.0462722	0.0847882	-0.0704976	0.0488323	-0.0873423	0.0526523	0.0569736	0.063918	0.066446	0.0647277	0.056501	0.04974	0.0402041	0.0580088	0.0226249	0.0822265	0.0583119	0.0618906	0.074295	-0.0634633	-0.0838889	0.0612207	0.04677	0.0618107	-0.0547511	0.0733627	0.047584	0.0567249	0.0617037	0.0633731	0.0725866
Plpbp:ENSMUST00000209525.1	-0.177035	-0.157518	-0.159259	0.19054	0.149995	0.189402	-0.149145	0.179638	-0.172854	0.131499	0.145799	0.126738	0.157548	0.176237	0.144847	0.151451	0.13154	0.156915	0.152668	0.187927	0.120223	0.146123	0.185565	-0.138185	-0.182611	0.15968	0.134028	0.165464	-0.136035	0.110157	0.152109	0.169255	0.161995	0.143236	0.132549
Gabbr1:ENSMUST00000025338.15	-0.206527	-0.155798	-0.182085	0.191708	0.149081	0.203537	-0.21001	0.125117	-0.207581	0.140412	0.12702	0.164467	0.143717	0.180363	0.14598	0.165792	0.120243	0.174371	0.127342	0.186835	0.157491	0.16098	0.214188	-0.149458	-0.197276	0.183387	0.135971	0.173201	-0.157564	0.204871	0.150377	0.165332	0.171692	0.160591	0.224468
Klf13:ENSMUST00000183817.1	-0.0858331	-0.0743124	-0.0926562	0.0700703	0.0604328	0.0802839	-0.0816049	0.0539971	-0.087741	0.0655857	0.0617021	0.0470786	0.0627598	0.0696027	0.0595535	0.0619166	0.044448	0.0737183	0.0564236	0.0865643	0.060533	0.0722617	0.0947804	-0.078051	-0.0855941	0.0529317	0.0496322	0.0543738	-0.0604519	0.0621037	0.0454722	0.0430455	0.0481349	0.0538668	0.0550362
Bpnt1:ENSMUST00000027916.12	-0.0890686	-0.060335	-0.0878992	0.074752	0.0646663	0.0919736	-0.06985	0.0546211	-0.097112	0.0514388	0.0811237	0.0566954	0.0465627	0.0758087	0.0627031	0.06629	0.0535399	0.0698792	0.0615582	0.0862203	0.0547988	0.0326249	0.0815481	-0.0590413	-0.0982403	0.0745618	0.0649844	0.0590538	-0.0659249	0.0679527	0.0834458	0.071126	0.0730866	0.063594	0.0698679
Tpm2:ENSMUST00000030184.11	-0.171979	-0.169793	-0.186865	0.172467	0.159167	0.221524	-0.0906655	0.235094	-0.268033	0.128629	0.270955	0.00416454	0.195281	0.104879	0.0438775	0.19484	0.215731	0.136008	0.216422	0.273174	0.072422	0.147668	0.181622	-0.0826265	-0.161642	0.105656	0.133983	0.145117	-0.105615	-0.0471987	0.0814974	0.120332	0.0847665	0.130854	0.137855
H4c9:ENSMUST00000102977.3	-0.094566	-0.102251	-0.0892318	0.112036	0.0766663	0.117611	-0.0555146	0.120724	-0.0864392	0.0592499	0.104629	0.0685717	0.0906176	0.117073	0.090066	0.0791308	0.086542	0.0894192	0.112042	0.123242	0.0931407	0.086336	0.131919	-0.0514884	-0.0981568	0.0823558	0.0903918	0.102465	-0.0718208	0.0450968	0.0974071	0.0872058	0.0916511	0.0846632	0.0749624
Cmip:ENSMUST00000166750.8	-0.0461308	-0.044004	-0.0348027	0.0393936	0.0251026	0.0414045	-0.0431083	0.0370096	-0.0447183	0.0341468	0.0377871	0.0384268	0.0320467	0.0366993	0.0324288	0.0451767	0.023179	0.0457917	0.0142625	0.0468237	0.0264401	0.0349517	0.0541019	-0.0240936	-0.0440068	0.0284274	0.00580896	0.0414311	-0.0521948	0.0309313	0.0248764	0.0304481	0.0344487	0.035675	0.0473489
Zfp148:ENSMUST00000165418.8	0.0302656	0.00147195	0.0099433	-0.0280336	-0.0139257	-0.0115183	0.0300181	-0.00966807	0.0145871	-0.00310895	0.00729643	-0.0136408	-0.0234167	-0.0340456	-0.0342344	-0.00581868	-0.00383917	-0.00409012	-0.00937367	-0.0117148	-0.0222987	-0.0176525	-0.0135189	0.0395173	0.0172628	-0.0099685	-0.0146429	-0.0167797	0.0188468	-0.0180838	-0.00402369	-0.0195552	-0.0264791	-0.0148904	-0.0123052
Rnaseh2b:ENSMUST00000022499.12	-0.0597213	-0.0514156	-0.0646999	0.0438105	0.0993323	0.0831513	-0.0379503	0.116741	-0.0817803	0.0432819	0.067711	0.0510905	0.081676	0.0771826	0.0969985	0.0932876	0.0925266	0.0709467	0.149288	0.14401	0.035843	0.0529582	0.0800209	-0.0369879	-0.0425746	0.0579586	0.0795872	0.0540198	-0.0515221	-0.0142386	0.0292723	0.0682885	0.0564133	0.0294076	0.0497177
Serbp1:ENSMUST00000042990.6	-0.0892204	-0.0288383	-0.0344589	0.0749242	0.0568897	0.0751141	-0.0521028	0.116097	-0.0783229	0.0463974	0.0937444	0.0372593	0.0769295	0.0751489	0.064982	0.0619752	0.0570022	0.0675702	0.0433568	0.108989	0.0623479	0.0664255	0.102611	-0.0659406	-0.0670563	0.073612	0.064637	0.0712093	-0.0394637	0.0300266	0.0619236	0.0714876	0.0754916	0.0383705	0.051849
Tpm1:ENSMUST00000113690.7	-0.36554	-0.346697	-0.352798	0.362751	0.288382	0.396241	-0.335336	0.299782	-0.417784	0.269338	0.316245	0.243961	0.324415	0.35025	0.257377	0.280313	0.280177	0.314473	0.29401	0.386925	0.276829	0.300494	0.386741	-0.282594	-0.405729	0.309185	0.274441	0.327858	-0.32906	0.24974	0.269111	0.285849	0.290912	0.266467	0.303984
Rps25:ENSMUST00000080300.8	-0.0620257	-0.0156023	-0.0580265	0.0478343	0.0565638	0.0586314	-0.062232	0.0729268	-0.0511201	0.0339524	0.0373896	0.0237633	0.0206011	0.0517181	0.0240654	0.0575108	0.0447308	0.0516241	0.0665887	0.0781422	0.0331094	0.0541917	0.0449446	-0.0376716	-0.0413223	0.0423064	0.0346136	0.0507504	0.0335812	0.0204221	0.0481733	0.0434347	0.0387268	0.0390176	0.0513055
Uqcrc2:ENSMUST00000033176.6	-0.033059	-0.0208443	-0.0379669	0.0329376	0.0333067	0.0547146	-0.0387509	0.091402	-0.0351542	0.0273477	0.017035	0.0502	0.0519498	0.044329	0.0403675	0.0652585	0.0368804	0.0364081	0.0600425	0.10684	0.0365138	0.0403796	0.0594589	-0.0391128	-0.0380081	0.0426192	0.0511503	0.046338	0.0225497	0.00671954	0.0474202	0.0478069	0.0391808	0.0203458	0.0236049
Arl6ip1:ENSMUST00000032888.9	-0.0816801	-0.0306969	-0.0628562	0.0532373	0.0498433	0.069367	-0.0366951	0.0965318	-0.0816049	0.0498283	0.0846211	-0.00164638	0.0436149	0.0417938	0.012231	0.0619167	0.0496842	0.0558546	0.0394125	0.0973421	0.0387073	0.051895	0.0579785	-0.0295533	-0.0661385	0.0597439	0.0477664	0.0415981	-0.0572029	0.035491	0.0415672	0.034432	0.029113	0.0400204	0.0655806
Timm50:ENSMUST00000081946.4	-0.088061	-0.0632733	-0.0695688	0.0705347	0.0763704	0.0909122	-0.0642947	0.112553	-0.088197	0.0645196	0.0457416	0.0597884	0.0974421	0.0749852	0.0599752	0.0788645	0.0612899	0.0751121	0.0780201	0.141104	0.0550778	0.0804829	0.0972017	-0.0748903	-0.0808248	0.080219	0.0553213	0.0709987	-0.0199239	0.0463815	0.0759372	0.0783234	0.0761641	0.0731744	0.0689543
Ckap4:ENSMUST00000053871.4	-0.0854456	-0.091362	-0.1035	0.0934971	0.0778202	0.118403	-0.079739	0.123975	-0.109225	0.0656538	0.0855477	0.0553231	0.106492	0.103595	0.0663715	0.0990402	0.0734324	0.0819993	0.0621331	0.142123	0.0689663	0.083298	0.108899	-0.0592681	-0.10035	0.0835132	0.0932553	0.0868499	-0.0723967	0.0527833	0.0879913	0.0619607	0.0689614	0.0687063	0.0834474
Dync1li1:ENSMUST00000047404.6	-0.0619839	-0.0533443	-0.0723769	0.0648859	0.0556711	0.0877595	-0.0527056	0.0608495	-0.0899648	0.0472821	0.0520938	0.038285	0.060165	0.0603882	0.0361609	0.0593163	0.0434194	0.063752	0.0191432	0.0737328	0.0484363	0.0543194	0.0747057	-0.05604	-0.0638707	0.0573386	0.0487173	0.049393	-0.029473	0.0581838	0.0524721	0.0555021	0.0472287	0.0412218	0.0684844
Amd1:ENSMUST00000099945.5	-0.0716432	-0.0520131	-0.0646609	0.0749766	0.0664843	0.0766178	-0.0426408	0.0610986	-0.080241	0.0527582	0.0802652	0.0300436	0.0617659	0.0643193	0.0502186	0.0693012	0.0629624	0.063299	0.0672248	0.0826473	0.0328662	0.0584269	0.069206	-0.0253602	-0.0632977	0.0582707	0.05962	0.0404279	-0.0498473	0.0345336	0.0540649	0.0560053	0.0515284	0.0541814	0.0602433
Mtln:ENSMUST00000135091.1	-0.16585	-0.0830965	-0.118878	0.167344	0.179084	0.170853	-0.0904702	0.0791232	-0.134752	0.117223	0.123127	0.113421	0.0945336	0.156512	0.18108	0.200137	0.110963	0.175654	0.253677	0.137415	0.0726613	0.126375	0.185152	-0.0905124	-0.105754	0.151456	0.161599	0.152697	-0.0985158	0.0504126	0.145012	0.161352	0.159115	0.141376	0.116382
Hbb-bt:ENSMUST00000098192.3	-0.0777132	-0.0712285	-0.091148	0.0889472	0.0689315	0.0938626	-0.0705441	0.145949	-0.0760713	0.0545017	-0.0158091	0.0936574	0.096528	0.0746544	0.055743	0.125691	0.0413768	0.0713203	0.0710327	0.162805	0.0633762	0.0642826	0.0993719	-0.0745859	-0.0793952	0.0632035	0.0635997	0.0960607	-0.00110663	0.0439262	0.0601143	0.0858435	0.0717726	0.0814513	0.0559155
Pdia4:ENSMUST00000077290.8	-0.0777297	-0.039214	-0.0476653	0.0546677	0.0507361	0.0677321	-0.0403433	0.0739095	-0.0726831	0.0590267	0.0571194	0.0136472	0.0720225	0.0457379	0.0233206	0.0717916	0.0562496	0.0662291	0.0555963	0.0799545	0.0251608	0.0480814	0.077371	-0.0314047	-0.0473936	0.0351775	0.050118	0.0418184	-0.0463528	-0.00375884	0.0313606	0.0557995	0.0541312	0.0395971	0.0242504
Pabpc1:ENSMUST00000001809.14	-0.166568	-0.130861	-0.169874	0.142958	0.135769	0.190762	-0.121731	0.204562	-0.192933	0.109957	0.174451	0.0928143	0.15504	0.151589	0.116383	0.156724	0.146503	0.138771	0.135249	0.24633	0.106296	0.145056	0.175678	-0.101812	-0.168122	0.141795	0.120433	0.136172	-0.122348	0.0917154	0.112191	0.106122	0.108584	0.117412	0.146037
Csnk1e:ENSMUST00000117786.7	-0.0252683	-0.026643	-0.0129358	0.0367393	0.032034	0.0406317	-0.0212638	0.0350071	-0.0398277	0.0307658	0.0389906	0.0231459	0.0310614	0.0331584	0.024806	0.0361125	0.0272353	0.0363952	0.035762	0.0432923	0.0151015	0.04328	0.0375076	-0.0133576	-0.0379017	0.0415556	0.0270198	0.0222369	-0.0415844	0.016272	0.0306022	0.0284128	0.0233401	0.0242287	0.0219684
Trpv2:ENSMUST00000018651.13	-0.06296	-0.0373825	-0.06025	0.0404434	0.0521929	0.0742466	-0.060588	0.0583057	-0.0504689	0.0371829	-0.015512	0.0473473	0.0401098	0.0591808	0.0498529	0.0740082	0.0458944	0.0570621	0.0781771	0.0731457	0.0294953	0.0585572	0.0627896	-0.0548427	-0.0502643	0.0446449	0.0515848	0.0601196	0.0420891	0.0243656	0.0583817	0.0525243	0.0444443	0.0453777	0.045778
Bzw2:ENSMUST00000020856.5	-0.0477296	0.0100208	-0.0376004	0.0159845	0.0402424	0.0390152	-0.0290832	0.00560778	-0.0267038	0.017156	0.0614872	0.00443942	-0.0103277	0.0412816	0.0232659	0.0536036	0.0162772	0.0360526	0.0646914	0.018476	-0.00644008	0.030932	0.0265053	-0.00750202	-0.0155369	0.0338828	0.0270992	0.0199403	-0.0721909	-0.00766997	0.0208738	0.0217454	0.0287139	0.0233665	0.0157975
Rexo2:ENSMUST00000034524.4	-0.0260805	-0.0203081	-0.0111295	0.0405069	0.0570123	0.0473281	-0.00942282	0.0377698	-0.030947	0.0361065	0.0368131	0.0249374	0.0475379	0.0397982	0.0346542	0.0631017	0.0258918	0.0624329	0.0892937	0.0566518	0.0138841	0.0307096	0.0421883	-0.0112149	-0.024374	0.0469341	0.042943	0.0210868	-0.015014	-0.0259439	0.037891	0.0470078	0.0328399	0.0279107	0.0125324
Cbx5:ENSMUST00000118152.7	0.00575709	-0.015424	-0.0104069	0.00113382	0.00856569	0.017952	-0.0211144	0.00251238	-0.0102701	0.0194332	-0.00825857	0.011951	-0.00698104	0.00756745	-0.00155284	0.0130214	0.0021688	0.0194016	0.00834458	-0.000973038	0.00648642	0.00747034	0.0162039	-0.00103673	-0.0128999	0.00705852	0.00412916	0.00597534	-0.00908913	0.018471	0.00408945	0.00292128	0.00825915	0.00896072	0.0206202
Riok2:ENSMUST00000024620.7	-0.0153462	-0.00643038	-0.0436857	0.0293469	0.0327686	0.0170311	-0.00912925	0.0115976	-0.0215901	-0.000101572	0.0142498	0.00839521	0.0203039	0.0133542	0.010873	0.0249645	0.0296711	0.0274838	0.0182963	0.0135825	-0.00418114	0.00723902	0.0352795	-0.0144697	-0.0222729	0.0252512	0.0102718	0.0105336	-0.0264991	0.00894277	0.0339531	0.0283315	0.0274968	0.0200662	0.0135919
Nampt:ENSMUST00000020886.8	0.022587	0.016441	0.0169516	-0.0218585	-0.0194313	-0.0285176	0.0161128	-0.0328783	0.0146885	-0.0248762	-0.0212897	-0.0344742	-0.0412101	-0.0210614	-0.0255251	-0.0455188	-0.0227869	-0.0198057	-0.0269261	-0.0364204	-0.0255635	-0.0283166	-0.0373629	0.0225461	0.0200606	-0.0172327	-0.031448	-0.0388409	0.0214893	0.0014656	-0.0174306	-0.0277009	-0.034617	-0.0127033	-0.00504654
Ctnnbl1:ENSMUST00000029178.6	0.0266861	0.0431891	0.0466323	-0.014482	-0.00348522	-0.0380752	0.0446132	-0.060033	0.0435764	-0.0364125	0.00241365	0.000818639	-0.038252	-0.000391705	0.0227221	-0.044807	-0.0163015	-0.0232218	0.000331262	-0.0788255	-0.0284774	-0.0294963	-0.0380396	0.0296358	0.0372645	-0.0047009	0.00159462	-0.0137053	0.0459526	0.00541278	0.000149181	-0.0124013	0.00728717	-0.00782574	0.00205727
Cfap36:ENSMUST00000020754.9	0.0196973	0.0347071	0.0179339	-0.0118839	-0.0324784	-0.0345585	0.0244896	-0.0408298	0.0225842	-0.0305209	-0.00190278	-0.0291635	-0.0412518	-0.0345938	-0.0382774	-0.0572328	-0.024767	-0.0248481	-0.0480075	-0.0690692	-0.0328819	-0.0311133	-0.0329651	0.0266523	0.0142193	-0.032057	-0.0271372	-0.0277573	0.00904231	0.0144209	-0.0144171	-0.0382786	-0.0144524	-0.00934153	-0.000131989
Ccdc59:ENSMUST00000020049.8	0.036974	0.0410135	0.0286704	-0.0255331	-0.0273291	-0.043347	0.0408363	-0.0367018	0.0365512	-0.0301374	-0.0408666	-0.0354931	-0.0404546	-0.0188353	-0.0356923	-0.0612229	-0.0227496	-0.0242186	-0.0339835	-0.045283	-0.0399344	-0.0324297	-0.0464529	0.0441249	0.0344774	-0.0204766	-0.0230635	-0.0378848	0.0403491	-0.0211349	-0.00575376	-0.0241938	-0.0240066	-0.0358263	-0.0254198
Nt5c2:ENSMUST00000235234.1	0.05642	0.0487815	0.0523566	-0.0387888	-0.0351494	-0.0548045	0.0728216	-0.0375942	0.0582134	-0.0440165	-0.0516424	-0.0546383	-0.0516161	-0.0567586	-0.0652014	-0.0407665	-0.0386472	-0.0490122	-0.0496729	-0.0714241	-0.0651139	-0.0507008	-0.0384837	0.0484624	0.0583047	-0.0612396	-0.0253703	-0.0501415	0.072328	-0.0355413	-0.0293773	-0.0302616	-0.0439359	-0.036885	-0.0405276
Tomm20:ENSMUST00000179857.2	0.0276443	0.0438251	0.0335989	-0.027427	-0.0260753	-0.0312485	0.0261347	-0.0216317	0.0327511	-0.0388201	-0.0387419	-0.0288095	-0.0454062	-0.0321186	-0.0186926	-0.0346294	-0.0163703	-0.0156005	-0.0248265	-0.0361532	-0.034046	-0.0249087	-0.032608	0.0249135	0.0234085	-0.011089	-0.0156179	-0.0307616	0.0475279	-0.0128213	-0.0127612	-0.0222115	-0.0187714	-0.0164642	-0.0199863
Ip6k1:ENSMUST00000035214.10	0.108258	0.062126	0.064615	-0.0802947	-0.0834257	-0.111258	0.091775	-0.0786044	0.0906272	-0.0811952	-0.0758068	-0.0808982	-0.086713	-0.08097	-0.0738733	-0.0853945	-0.0652261	-0.10186	-0.0776933	-0.113774	-0.0669464	-0.0780772	-0.110262	0.0654318	0.0899875	-0.0926636	-0.0691199	-0.0868185	0.0564693	-0.0748212	-0.0719642	-0.0854662	-0.0692	-0.0718337	-0.085114
Fxn:ENSMUST00000081333.10	0.0819067	0.0416366	0.0432105	-0.0600782	-0.04691	-0.0679257	0.0647781	-0.0510491	0.0558775	-0.0426333	-0.0327977	-0.0686305	-0.0565221	-0.0594922	-0.0513925	-0.0623042	-0.0404603	-0.0621909	-0.0695164	-0.0823345	-0.0610798	-0.0503206	-0.091859	0.0492277	0.0568055	-0.0548313	-0.0541433	-0.0676328	0.0375114	-0.0125952	-0.0499223	-0.0740752	-0.0609583	-0.0461437	-0.0252943
Acp1:ENSMUST00000062740.14	0.0946566	0.0498691	0.0516346	-0.0812653	-0.0663216	-0.077856	0.0765736	-0.0564457	0.0553794	-0.0630406	-0.039912	-0.0895457	-0.0862881	-0.0796752	-0.0780168	-0.0849906	-0.0501979	-0.0828869	-0.0982814	-0.0867644	-0.0624044	-0.0631004	-0.108344	0.0791588	0.0624212	-0.0694108	-0.0716814	-0.0894714	0.0668161	-0.054035	-0.0779339	-0.103005	-0.102235	-0.0653514	-0.0579693
Lap3:ENSMUST00000046122.10	0.103627	0.081574	0.0701899	-0.0775269	-0.0667145	-0.096874	0.0872818	-0.07964	0.0919079	-0.0802808	-0.0757028	-0.067946	-0.0763945	-0.0972365	-0.0703616	-0.0903897	-0.0600292	-0.0913864	-0.0809757	-0.111402	-0.058628	-0.0722984	-0.122064	0.0850783	0.0983514	-0.0836124	-0.0705894	-0.0983481	0.0986107	-0.0642072	-0.0849035	-0.0792011	-0.0883605	-0.0656801	-0.0702756
Mxd4:ENSMUST00000042701.12	0.05229	0.0237023	0.0378383	-0.0358589	-0.0446617	-0.0379611	0.060368	-0.0220311	0.044689	-0.0332341	-0.0293468	-0.0350848	-0.0186573	-0.0417719	-0.0575866	-0.033107	-0.00167945	-0.0326258	-0.0297495	-0.0373737	-0.0409897	-0.0366324	-0.0306396	0.0455556	0.0409854	-0.0345507	-0.0279577	-0.0488889	0.0305619	-0.0457791	-0.0247795	-0.0321253	-0.0363629	-0.0361377	-0.0381594
Nasp:ENSMUST00000030457.11	0.107108	0.088648	0.0854709	-0.0961373	-0.0824902	-0.111019	0.104224	-0.088081	0.100139	-0.0756179	-0.0824465	-0.0782078	-0.111389	-0.104485	-0.0798152	-0.100503	-0.0676523	-0.0932981	-0.113128	-0.130758	-0.0665233	-0.0898332	-0.127275	0.0883875	0.10295	-0.0906682	-0.0897674	-0.109152	0.0830947	-0.0251638	-0.0844603	-0.103896	-0.0904336	-0.0732776	-0.0571013
Csf2ra:ENSMUST00000076046.6	0.100026	0.087391	0.0849876	-0.0789223	-0.0721808	-0.089333	0.10361	-0.0594755	0.0686691	-0.0717076	-0.0982076	-0.0747679	-0.0812775	-0.0969367	-0.077171	-0.0702859	-0.0664606	-0.0926547	-0.0774607	-0.0961488	-0.0603729	-0.0888077	-0.11951	0.0805569	0.107556	-0.0893586	-0.0559184	-0.0950592	0.0556061	-0.0517301	-0.0804654	-0.0866577	-0.0725987	-0.0738667	-0.0919909
Zdhhc3:ENSMUST00000147563.8	0.109732	0.0857501	0.112983	-0.114307	-0.10346	-0.114476	0.0936454	-0.105378	0.117312	-0.0813493	-0.0955024	-0.0918366	-0.0854546	-0.104494	-0.0952464	-0.107515	-0.080153	-0.11899	-0.107859	-0.129435	-0.0878176	-0.0836446	-0.132631	0.09212	0.105887	-0.0989497	-0.0926389	-0.120092	0.0785237	-0.0751532	-0.100708	-0.0948536	-0.104477	-0.086795	-0.0979294
Gosr2:ENSMUST00000021329.13	0.103215	0.0679731	0.0816523	-0.0781645	-0.0607516	-0.0980084	0.0835805	-0.104833	0.0818994	-0.066372	-0.0657078	-0.0860336	-0.114572	-0.0833481	-0.0764304	-0.0974974	-0.0608327	-0.0859902	-0.0882156	-0.112694	-0.0809167	-0.0740546	-0.125652	0.0818816	0.0917672	-0.0798325	-0.0707304	-0.0938643	0.0583915	-0.0417186	-0.085255	-0.0816649	-0.0854374	-0.0531096	-0.0576064
Mcl1:ENSMUST00000037947.14	0.0916229	0.0631428	0.0756442	-0.085752	-0.0613459	-0.0822108	0.0734386	-0.0662439	0.0982866	-0.0556595	-0.0471691	-0.0576667	-0.091053	-0.0708768	-0.0651472	-0.0712455	-0.0424697	-0.0764987	-0.0741247	-0.0861139	-0.0432454	-0.0690594	-0.0696061	0.0759275	0.0778699	-0.0755939	-0.0746246	-0.0682764	0.0594643	-0.0434583	-0.0655019	-0.0557946	-0.0625939	-0.0572367	-0.0424087
Snx27:ENSMUST00000029783.15	0.0401329	0.0103939	0.0326703	-0.0392007	-0.0381514	-0.0394613	0.011406	-0.0247118	0.0351508	-0.0204729	-0.0194267	-0.0367298	-0.0506845	-0.0462762	-0.0386867	-0.0375996	-0.0386601	-0.0320531	-0.0421725	-0.0436113	-0.0259886	-0.0309209	-0.0486924	0.0345402	0.0405656	-0.0316364	-0.0169163	-0.0333249	0.0384239	-0.0059987	-0.0301743	-0.0470103	-0.0362268	-0.0292031	-0.0147785
Cnot11:ENSMUST00000161515.7	0.127725	0.0915411	0.0987768	-0.115323	-0.0869398	-0.120097	0.103787	-0.103891	0.117008	-0.0768301	-0.0927245	-0.0817713	-0.123853	-0.110313	-0.0766884	-0.103047	-0.0677989	-0.0978986	-0.0921249	-0.135713	-0.082507	-0.0952964	-0.123279	0.128331	0.10606	-0.103925	-0.0834543	-0.104382	0.0746423	-0.048405	-0.0973824	-0.100433	-0.0931958	-0.0830714	-0.07458
Dcun1d1:ENSMUST00000178098.7	0.0305251	0.0134807	0.0133462	-0.018451	-0.0310419	-0.0230472	0.0229317	-0.0163797	0.0247634	-0.00598992	-0.0175268	-0.0227316	-0.0143024	-0.0225628	-0.0218296	-0.0188191	-0.00764633	-0.0164097	-0.0299784	-0.0322118	-0.00936032	-0.0211696	-0.02492	0.0278541	0.0268286	-0.0171815	-0.0116752	-0.031349	0.0117332	0.00400371	-0.0106213	-0.022549	-0.0239145	-0.0135489	-0.00807974
Abhd10:ENSMUST00000066983.12	0.0478905	0.0288724	0.0278178	-0.0274261	-0.0169858	-0.0462058	0.0445519	-0.0375428	0.0323127	-0.0345196	-0.0243923	-0.0434729	-0.0297531	-0.0524101	-0.0306476	-0.0397664	-0.0110159	-0.033884	-0.0166127	-0.0452407	-0.0345126	-0.0366446	-0.0548795	0.0603143	0.0383917	-0.0207885	-0.0313187	-0.0429706	0.0443558	-0.028226	-0.0251337	-0.0403073	-0.0428509	-0.016233	-0.0337562
Tm7sf3:ENSMUST00000037709.15	0.0717243	0.0668045	0.0762696	-0.0643285	-0.0721083	-0.0890933	0.0549819	-0.0585981	0.0877484	-0.048646	-0.0698088	-0.0462055	-0.054391	-0.0708941	-0.0458673	-0.0571587	-0.0606522	-0.0750744	-0.0862788	-0.0857424	-0.0540616	-0.0653497	-0.0825212	0.0371921	0.0735541	-0.0733688	-0.0657863	-0.0689393	0.0548201	-0.0581997	-0.0688672	-0.0636017	-0.0594531	-0.0638349	-0.0488468
Cntnap2:ENSMUST00000114641.7	0.0483254	0.0502319	0.0367973	-0.0609311	-0.0416702	-0.0525793	0.0479815	-0.0506103	0.0630304	-0.04313	-0.0570769	-0.0507086	-0.0543908	-0.0511693	-0.0360634	-0.0283324	-0.051205	-0.0608316	-0.0423776	-0.0559469	-0.0474681	-0.0446133	-0.0543561	0.0227724	0.0506659	-0.0452695	-0.0339198	-0.0368991	0.0507135	-0.0222749	-0.0376521	-0.0484933	-0.0471466	-0.0361468	-0.0465917
Lsamp:ENSMUST00000099761.9	0.0842121	0.0940646	0.0982998	-0.104479	-0.0761643	-0.118251	0.079202	-0.0827547	0.127788	-0.0799771	-0.0836008	-0.0756491	-0.0729368	-0.11673	-0.0885919	-0.0903101	-0.0941773	-0.0943825	-0.073087	-0.110522	-0.0985907	-0.0766599	-0.109244	0.0953188	0.118928	-0.0864214	-0.0916085	-0.106358	0.0662618	-0.101642	-0.0869365	-0.0951448	-0.0878523	-0.0937219	-0.10329
Mdga1:ENSMUST00000171691.8	0.183519	0.102931	0.118415	-0.125483	-0.109445	-0.166576	0.146691	-0.0922407	0.150472	-0.133128	-0.103969	-0.117616	-0.107057	-0.12793	-0.121779	-0.115937	-0.0785155	-0.133088	-0.0755203	-0.142212	-0.118047	-0.0970277	-0.160657	0.113056	0.146791	-0.120317	-0.0991468	-0.136452	0.125408	-0.130835	-0.0947119	-0.108674	-0.106701	-0.0829664	-0.161792
Oxr1:ENSMUST00000110297.9	0.101387	0.0848117	0.0884635	-0.0817482	-0.049264	-0.110013	0.0909375	-0.087199	0.0854254	-0.0644477	-0.0652978	-0.0779671	-0.0857414	-0.0941535	-0.0817726	-0.0649159	-0.0565778	-0.0936229	-0.0827358	-0.109612	-0.0725951	-0.0857483	-0.114886	0.076512	0.0996175	-0.092998	-0.0737854	-0.0862295	0.0793531	-0.0670404	-0.0887882	-0.0818612	-0.0999034	-0.0632525	-0.0739917
Ube2a:ENSMUST00000200835.3	0.0735446	0.0822095	0.0813656	-0.0726479	-0.0693215	-0.0800336	0.0881936	-0.0740426	0.0756668	-0.0531403	-0.0565564	-0.0603536	-0.0778567	-0.0825532	-0.0573451	-0.061109	-0.0599625	-0.0636522	-0.0726019	-0.0973612	-0.0636948	-0.070511	-0.0986417	0.0668348	0.0795299	-0.0631914	-0.0629407	-0.0737968	0.0650186	-0.0445143	-0.0587945	-0.0655999	-0.0700422	-0.0511868	-0.0627621
Bdh1:ENSMUST00000115227.9	0.0813058	0.0678259	0.0431997	-0.0618512	-0.0466071	-0.0746173	0.083115	-0.0483853	0.0547468	-0.0582821	-0.0427586	-0.0734374	-0.0800726	-0.0627468	-0.0517528	-0.0547598	-0.0331591	-0.0508122	-0.0364238	-0.0694231	-0.0554853	-0.0638975	-0.0930706	0.0584523	0.0739502	-0.0634399	-0.0476764	-0.0777257	0.0834349	-0.0684818	-0.0504273	-0.0738789	-0.0803299	-0.0578143	-0.0704891
Srebf2:ENSMUST00000023100.7	0.094468	0.0698435	0.0678918	-0.0887003	-0.0646868	-0.0907853	0.0752117	-0.0750408	0.0964872	-0.0653371	-0.0569996	-0.0621451	-0.0826389	-0.0991876	-0.0679084	-0.0583553	-0.0695195	-0.085807	-0.0651051	-0.0982097	-0.067298	-0.0736448	-0.095612	0.0683823	0.100971	-0.0884662	-0.0493773	-0.0748387	0.0667154	-0.0897926	-0.070949	-0.0684495	-0.0828104	-0.0603948	-0.0800929
Dync1li2:ENSMUST00000041769.7	0.125528	0.0869541	0.0891694	-0.119502	-0.0935507	-0.113516	0.0976547	-0.0936375	0.124977	-0.110332	-0.107856	-0.0919438	-0.107439	-0.102991	-0.112962	-0.0939171	-0.091585	-0.103915	-0.0843631	-0.124391	-0.111898	-0.0863808	-0.143394	0.0870677	0.112803	-0.108889	-0.111109	-0.0991615	0.0816739	-0.0564986	-0.0993375	-0.103252	-0.104527	-0.0845221	-0.0904995
Fxr1:ENSMUST00000197694.4	0.0464965	0.0433122	0.0464147	-0.0445012	-0.0267707	-0.0522456	0.0412981	-0.0476093	0.0611614	-0.0396748	-0.0502886	-0.0171693	-0.0573354	-0.0415736	-0.0374373	-0.0395316	-0.0534278	-0.0464011	-0.0433071	-0.063074	-0.029768	-0.0364354	-0.0472786	0.0214233	0.0555793	-0.0369828	-0.0487276	-0.0381377	0.0356645	-0.0102023	-0.0348785	-0.0441125	-0.0274267	-0.0294154	-0.0381861
Cdc37l1:ENSMUST00000225210.1	0.0696844	0.0809805	0.0385205	-0.057161	-0.042584	-0.0689769	0.0330146	-0.0924403	0.0631726	-0.0409219	-0.0553217	-0.0591881	-0.0794572	-0.0638084	-0.0379538	-0.0604282	-0.0475716	-0.0702964	-0.0576279	-0.0831803	-0.0565273	-0.0433829	-0.0829949	0.00461929	0.0697568	-0.0516836	-0.0710187	-0.0614865	0.0383089	-0.0590155	-0.0630971	-0.0518939	-0.0645792	-0.0419836	-0.0620737
Derl2:ENSMUST00000143850.7	0.125504	0.113104	0.103786	-0.114719	-0.0912204	-0.131292	0.0868475	-0.120864	0.136766	-0.0976248	-0.123704	-0.0820633	-0.114105	-0.118966	-0.103631	-0.0906905	-0.118626	-0.120303	-0.119464	-0.143582	-0.106179	-0.0898545	-0.153774	0.082098	0.138782	-0.108213	-0.105876	-0.125887	0.11429	-0.0884145	-0.0961716	-0.0857859	-0.0927852	-0.104055	-0.107178
Osgin2:ENSMUST00000037198.9	0.132258	0.130201	0.119417	-0.137626	-0.107399	-0.167039	0.101418	-0.126751	0.161851	-0.0896207	-0.131237	-0.0921661	-0.116862	-0.128679	-0.0918555	-0.0867971	-0.113508	-0.141364	-0.12777	-0.166777	-0.10298	-0.110785	-0.159034	0.102268	0.137093	-0.141141	-0.0940039	-0.123292	0.0986855	-0.0997305	-0.121796	-0.102962	-0.114875	-0.103548	-0.11099
2810408A11Rik:ENSMUST00000102580.9	0.043288	0.0259595	0.0552109	-0.0277936	-0.0424998	-0.0281799	0.0133526	-0.0620762	0.0449791	-0.000689468	-0.0595438	-0.00379726	-0.0296882	-0.0370827	-0.0339666	-0.066661	-0.0300458	-0.0371396	-0.0192446	-0.0522682	0.0136393	-0.0303707	-0.0329961	0.00673284	0.0184167	-0.0184449	-0.0475269	-0.0234401	0.0034863	-0.0288844	-0.0385639	-0.0351869	-0.0375171	-0.0172442	-0.0481428
1600012H06Rik:ENSMUST00000052691.8	0.106866	0.0626217	0.084702	-0.0846656	-0.0788467	-0.105444	0.0881936	-0.0892458	0.0995385	-0.0777024	-0.0688555	-0.0725452	-0.0851928	-0.10489	-0.0705745	-0.103665	-0.0599696	-0.101244	-0.0785281	-0.112871	-0.0655677	-0.083323	-0.128377	0.107169	0.104011	-0.107358	-0.0849187	-0.0953931	0.0645698	-0.0584023	-0.0930074	-0.0975412	-0.0832076	-0.0795163	-0.089312
Fam210b:ENSMUST00000028995.4	0.0976956	0.0603372	0.0732556	-0.0976728	-0.070749	-0.103084	0.0730863	-0.0821628	0.0959475	-0.0671235	-0.0804923	-0.0684584	-0.0587552	-0.094207	-0.074311	-0.0829588	-0.0770997	-0.11463	-0.0639489	-0.0861322	-0.0768445	-0.0810076	-0.129463	0.079585	0.109096	-0.0946989	-0.0963042	-0.0964665	0.0545083	-0.0711792	-0.0865505	-0.0867597	-0.088664	-0.0797545	-0.0840885
Hnrnpll:ENSMUST00000184635.7	0.0869046	0.0325197	0.0434614	-0.0680772	-0.0583985	-0.0792354	0.0554969	-0.082723	0.0806687	-0.0593509	-0.0517338	-0.0333687	-0.0862246	-0.0669171	-0.0467212	-0.054338	-0.0587032	-0.0677977	-0.0406233	-0.0816164	-0.0573724	-0.0681755	-0.0970315	0.0588372	0.0792325	-0.0703529	-0.0443191	-0.0534319	0.0366377	-0.0347658	-0.0606943	-0.0551848	-0.0612983	-0.0355541	-0.0554215
Pole4:ENSMUST00000095786.5	0.121921	0.105382	0.110899	-0.111049	-0.0936292	-0.134419	0.122355	-0.105881	0.138294	-0.100588	-0.0998776	-0.102641	-0.100882	-0.124166	-0.0925075	-0.0993459	-0.0869211	-0.11911	-0.0990067	-0.123406	-0.0975266	-0.10256	-0.148047	0.104892	0.126617	-0.103505	-0.0953847	-0.126886	0.0976001	-0.0877549	-0.0937477	-0.0996208	-0.100988	-0.0943581	-0.102607
Zc2hc1a:ENSMUST00000051064.8	0.0707082	0.0673874	0.0667365	-0.0642029	-0.0676492	-0.0774346	0.0737892	-0.0665325	0.0909705	-0.046804	-0.0581885	-0.0683309	-0.0716275	-0.0773321	-0.0632192	-0.0726471	-0.0525407	-0.0715038	-0.0751655	-0.118079	-0.0706839	-0.0703799	-0.0886775	0.059043	0.0824019	-0.0750258	-0.0542826	-0.071163	0.0773589	-0.0765436	-0.0527391	-0.0700363	-0.0662945	-0.0600796	-0.0840577
Ufd1:ENSMUST00000005394.12	0.121694	0.118698	0.105092	-0.121588	-0.0973964	-0.142338	0.117257	-0.0973081	0.141789	-0.0842875	-0.0981092	-0.079269	-0.105428	-0.117003	-0.0876702	-0.0882313	-0.0986278	-0.114778	-0.10388	-0.1287	-0.10187	-0.0963115	-0.148561	0.090423	0.139593	-0.101157	-0.0917848	-0.117655	0.0843095	-0.0995436	-0.105118	-0.108404	-0.0978913	-0.0988052	-0.108434
Dnajc11:ENSMUST00000062904.10	0.165121	0.135853	0.156943	-0.162879	-0.137264	-0.1847	0.146403	-0.147536	0.179698	-0.106978	-0.145156	-0.106386	-0.126038	-0.165786	-0.142809	-0.126706	-0.123285	-0.162059	-0.141919	-0.183414	-0.115521	-0.142118	-0.199626	0.123838	0.165738	-0.148541	-0.115812	-0.159809	0.131645	-0.12455	-0.138584	-0.12669	-0.136866	-0.124867	-0.134324
Lin7c:ENSMUST00000028583.7	0.14294	0.127665	0.124204	-0.130708	-0.109839	-0.142677	0.138672	-0.114721	0.148059	-0.103158	-0.115302	-0.101701	-0.124336	-0.136238	-0.104072	-0.101419	-0.106946	-0.121794	-0.108442	-0.143929	-0.106566	-0.120926	-0.158995	0.107923	0.15062	-0.118311	-0.106785	-0.129969	0.120805	-0.110458	-0.102927	-0.11693	-0.106295	-0.10261	-0.132346
Map1lc3b:ENSMUST00000034270.16	0.179555	0.150524	0.153845	-0.15926	-0.130804	-0.185045	0.165637	-0.140175	0.178573	-0.125462	-0.141412	-0.13798	-0.157161	-0.159818	-0.127673	-0.136697	-0.118343	-0.158013	-0.126845	-0.179257	-0.140841	-0.150739	-0.198079	0.135017	0.189016	-0.14987	-0.125101	-0.164789	0.127133	-0.138523	-0.129625	-0.1321	-0.13393	-0.121734	-0.156927
Selenok:ENSMUST00000112268.2	0.11848	0.102908	0.0992243	-0.108219	-0.0852232	-0.127977	0.102513	-0.098179	0.124881	-0.0905115	-0.115952	-0.0858124	-0.0982176	-0.109744	-0.0859109	-0.0946189	-0.0745217	-0.106063	-0.0846966	-0.120798	-0.095896	-0.10071	-0.134565	0.0900999	0.127099	-0.106207	-0.0840721	-0.110027	0.11231	-0.0890437	-0.0902239	-0.086067	-0.0961504	-0.0833293	-0.106244
Tmed7:ENSMUST00000151189.1	0.106428	0.113158	0.105702	-0.106857	-0.0873435	-0.126917	0.104949	-0.0893634	0.129023	-0.0857113	-0.0956562	-0.0902757	-0.0871269	-0.0909963	-0.0858581	-0.0761978	-0.0742503	-0.0977038	-0.0826861	-0.111551	-0.0747589	-0.10933	-0.120411	0.0919743	0.129286	-0.109867	-0.0805943	-0.115263	0.0951734	-0.102869	-0.0801539	-0.0701978	-0.077908	-0.0900546	-0.0996407
Rcbtb2:ENSMUST00000164822.7	0.105928	0.0966617	0.0921322	-0.0865547	-0.0786507	-0.100236	0.0778222	-0.0955097	0.106185	-0.0738763	-0.0930105	-0.0775438	-0.0936933	-0.0900827	-0.0850882	-0.0786911	-0.0707092	-0.0778769	-0.0787846	-0.120422	-0.0651689	-0.0754116	-0.119049	0.0805912	0.0992189	-0.0841421	-0.0861237	-0.0959641	0.0801019	-0.0489755	-0.0866751	-0.0885269	-0.076592	-0.0722767	-0.077262
Seh1l:ENSMUST00000025421.8	0.333568	0.278492	0.303515	-0.327278	-0.265109	-0.363065	0.291478	-0.288622	0.368579	-0.25312	-0.300103	-0.216801	-0.279186	-0.324903	-0.238034	-0.251299	-0.248965	-0.310238	-0.295222	-0.360723	-0.242774	-0.271195	-0.369257	0.271715	0.34891	-0.296546	-0.245395	-0.307951	0.260952	-0.235637	-0.262985	-0.270475	-0.269118	-0.2454	-0.274175
Otud6b:ENSMUST00000117268.8	0.073107	0.0675831	0.0652738	-0.0656052	-0.047598	-0.0743127	0.059029	-0.069049	0.0593731	-0.0508189	-0.0394415	-0.0553054	-0.0699874	-0.0599643	-0.0520289	-0.0725835	-0.0370215	-0.0688999	-0.0615518	-0.0848261	-0.0335992	-0.0630045	-0.0757394	0.0469546	0.0803067	-0.0550556	-0.0457055	-0.0786367	0.0754923	-0.0325667	-0.0539569	-0.0425142	-0.0588327	-0.0546783	-0.053675
Cnih4:ENSMUST00000134115.7	0.0995063	0.0903359	0.0951375	-0.101351	-0.0828598	-0.112584	0.0856755	-0.0854545	0.116032	-0.0782554	-0.092982	-0.0699806	-0.0938777	-0.0929041	-0.0764168	-0.0678721	-0.0663155	-0.0881487	-0.0825578	-0.111045	-0.0892922	-0.0873299	-0.120768	0.0710604	0.112978	-0.0929725	-0.0777968	-0.100996	0.0795177	-0.0622514	-0.0921555	-0.089299	-0.0949977	-0.0738963	-0.0794713
Rab2a:ENSMUST00000060232.7	0.157874	0.150766	0.145618	-0.14811	-0.118101	-0.176629	0.16106	-0.119644	0.170294	-0.120089	-0.123243	-0.126697	-0.143547	-0.14566	-0.121444	-0.130632	-0.108772	-0.146838	-0.121621	-0.164254	-0.131172	-0.131589	-0.178258	0.12632	0.167258	-0.138819	-0.115694	-0.154599	0.127078	-0.132252	-0.119767	-0.122336	-0.128407	-0.117415	-0.148598
Lix1l:ENSMUST00000062058.4	0.116395	0.0891439	0.0907475	-0.0940288	-0.100617	-0.116472	0.0974149	-0.085737	0.112594	-0.0759873	-0.0894377	-0.0669846	-0.0937219	-0.0993176	-0.0932469	-0.0946258	-0.082376	-0.0831751	-0.0897158	-0.115314	-0.0922237	-0.106361	-0.129055	0.0874429	0.118853	-0.0921258	-0.0638698	-0.0999888	0.0777021	-0.0701816	-0.0768976	-0.0765264	-0.0781203	-0.0857307	-0.0852585
Gmps:ENSMUST00000029405.7	0.139247	0.115853	0.105629	-0.129562	-0.104873	-0.140634	0.0891866	-0.129887	0.139251	-0.0999597	-0.118877	-0.0974811	-0.136507	-0.136043	-0.113971	-0.100692	-0.0972067	-0.112735	-0.112662	-0.151806	-0.0994872	-0.104332	-0.159273	0.102624	0.140502	-0.1007	-0.0948365	-0.12385	0.104616	-0.0809795	-0.127178	-0.131764	-0.12514	-0.0852066	-0.0908648
Gnb1:ENSMUST00000165335.7	0.200452	0.184902	0.184479	-0.198993	-0.160105	-0.227332	0.191625	-0.160008	0.22676	-0.159024	-0.179329	-0.152957	-0.180241	-0.194066	-0.161701	-0.159997	-0.150256	-0.186375	-0.166805	-0.216458	-0.164366	-0.168718	-0.231911	0.158495	0.22664	-0.180069	-0.151744	-0.197364	0.169496	-0.164542	-0.155307	-0.162572	-0.162336	-0.152441	-0.194677
Cdc26:ENSMUST00000084525.11	0.21871	0.194563	0.208317	-0.215157	-0.165357	-0.245895	0.194044	-0.19395	0.230739	-0.157198	-0.185378	-0.145393	-0.165307	-0.201152	-0.158638	-0.161015	-0.159224	-0.191744	-0.161174	-0.234573	-0.161999	-0.177857	-0.25359	0.156046	0.23808	-0.184193	-0.158733	-0.202625	0.163392	-0.166959	-0.172405	-0.165946	-0.174628	-0.155175	-0.184538
Wdr77:ENSMUST00000010278.11	0.115818	0.102696	0.101234	-0.114618	-0.0789867	-0.12024	0.100686	-0.111453	0.131368	-0.0851295	-0.0994872	-0.0874105	-0.115267	-0.107312	-0.102249	-0.0983644	-0.0807955	-0.108246	-0.126667	-0.141758	-0.0728451	-0.0857992	-0.134933	0.0940576	0.125985	-0.0996865	-0.0791338	-0.10697	0.102882	-0.0621272	-0.0916626	-0.0992427	-0.102609	-0.082627	-0.0873247
Yaf2:ENSMUST00000080299.6	0.128457	0.100569	0.110093	-0.109062	-0.0906625	-0.121637	0.101681	-0.0823295	0.122144	-0.0930605	-0.0991695	-0.0814697	-0.098179	-0.113148	-0.0921613	-0.0835703	-0.0737964	-0.09446	-0.0914315	-0.115994	-0.0950213	-0.0824206	-0.126425	0.0918579	0.12007	-0.097618	-0.0826798	-0.10365	0.0895806	-0.0907675	-0.085947	-0.0897518	-0.0866338	-0.0730224	-0.0995279
Sike1:ENSMUST00000029447.11	0.115742	0.101147	0.0930453	-0.132652	-0.098984	-0.132933	0.100064	-0.115441	0.14445	-0.0985314	-0.118531	-0.0825643	-0.107365	-0.125462	-0.0859436	-0.088034	-0.100922	-0.116314	-0.122817	-0.141804	-0.0976297	-0.099155	-0.151084	0.0857355	0.130674	-0.111439	-0.108007	-0.116482	0.0940971	-0.0864385	-0.105593	-0.113771	-0.103926	-0.0943195	-0.108937
Dynll2:ENSMUST00000178105.2	0.208543	0.161049	0.193903	-0.19993	-0.160351	-0.229201	0.195348	-0.189684	0.211688	-0.149667	-0.178721	-0.155675	-0.176056	-0.206405	-0.166365	-0.179859	-0.147118	-0.205785	-0.165003	-0.22313	-0.164405	-0.183547	-0.249543	0.152392	0.218353	-0.192039	-0.164576	-0.201699	0.144163	-0.166051	-0.18204	-0.184467	-0.182118	-0.162399	-0.193316
4931428F04Rik:ENSMUST00000212922.1	0.106144	0.0887778	0.0844194	-0.0976527	-0.0671252	-0.112575	0.106216	-0.0578596	0.113617	-0.0845517	-0.0759728	-0.0684813	-0.0815858	-0.0830492	-0.0727533	-0.0823569	-0.0665518	-0.0921676	-0.0726075	-0.0975878	-0.0862655	-0.109406	-0.123139	0.0911511	0.107131	-0.0941937	-0.0620633	-0.0928259	0.0702634	-0.0981534	-0.0839049	-0.0867371	-0.0954414	-0.071654	-0.114897
Mapre2:ENSMUST00000170802.7	0.127017	0.100584	0.0939857	-0.112873	-0.0943916	-0.123888	0.104679	-0.113807	0.122655	-0.104464	-0.0959035	-0.109182	-0.121195	-0.11822	-0.0963013	-0.119712	-0.0910006	-0.113336	-0.0901138	-0.143757	-0.105861	-0.122167	-0.144173	0.0944369	0.121909	-0.11417	-0.0974614	-0.103391	0.087855	-0.106419	-0.0885689	-0.104518	-0.116236	-0.0875693	-0.123625
H2aw:ENSMUST00000108817.4	0.0836193	0.0512199	0.0601585	-0.0652212	-0.0462233	-0.0736161	0.0876706	-0.0498595	0.0762969	-0.0569553	-0.0388984	-0.0618172	-0.0544359	-0.0678519	-0.0542861	-0.0576034	-0.0390474	-0.0604676	-0.0401655	-0.0536406	-0.0617203	-0.0616753	-0.0805277	0.071979	0.0748411	-0.0595943	-0.0491972	-0.0684241	0.0617138	-0.0732218	-0.0547103	-0.0602416	-0.0609823	-0.062743	-0.0740467
Cd47:ENSMUST00000229101.1	0.0847332	0.0632687	0.074442	-0.0713739	-0.0596869	-0.0843592	0.0753491	-0.0622444	0.0803431	-0.0500018	-0.0676638	-0.0571483	-0.0621339	-0.0631319	-0.0539255	-0.0683329	-0.0547759	-0.069401	-0.0445485	-0.0795159	-0.0562803	-0.0669124	-0.0866067	0.0583643	0.082622	-0.0525052	-0.054763	-0.0696624	0.0514103	-0.0552746	-0.0666135	-0.0642484	-0.0668222	-0.0492641	-0.0749391
Vps26b:ENSMUST00000034470.10	0.074831	0.053508	0.0631518	-0.082791	-0.0602401	-0.073857	0.0555886	-0.0774751	0.0812203	-0.0576578	-0.0816956	-0.0611183	-0.0609142	-0.0569746	-0.0572622	-0.0594444	-0.0534867	-0.0628049	-0.0585641	-0.0819353	-0.0645149	-0.0591059	-0.0727301	0.0619214	0.075074	-0.0625592	-0.0517351	-0.0611334	0.0320125	-0.0622976	-0.0500234	-0.0489144	-0.0541441	-0.0640278	-0.0749409
Prr12:ENSMUST00000057293.7	0.155029	0.135277	0.156162	-0.146051	-0.120655	-0.161612	0.156119	-0.138743	0.188573	-0.0951365	-0.135562	-0.101195	-0.133498	-0.163093	-0.106215	-0.143822	-0.129158	-0.160107	-0.132016	-0.156603	-0.13891	-0.120675	-0.159048	0.119152	0.158639	-0.133615	-0.102507	-0.131878	0.118875	-0.106212	-0.110402	-0.111972	-0.137347	-0.134443	-0.171541
Pla2g12a:ENSMUST00000029629.14	0.0798473	0.0763458	0.0692372	-0.0697464	-0.0633802	-0.0972919	0.0782815	-0.0714126	0.0961502	-0.0552277	-0.0551322	-0.0520824	-0.0662698	-0.0734633	-0.0535131	-0.0779449	-0.0614922	-0.068688	-0.0687203	-0.0821826	-0.0699452	-0.0534428	-0.0904278	0.0513847	0.0881225	-0.0649	-0.0650868	-0.0776287	0.0671023	-0.0741072	-0.0598564	-0.0670624	-0.0651973	-0.0467854	-0.073197
Kctd10:ENSMUST00000102581.10	0.10456	0.0890382	0.0936087	-0.0871554	-0.0827107	-0.116908	0.0926084	-0.0823553	0.131703	-0.0676793	-0.10023	-0.0805636	-0.0840319	-0.095485	-0.0758666	-0.0873193	-0.0797488	-0.0857219	-0.0932525	-0.112951	-0.0617528	-0.0984746	-0.0999291	0.0663103	0.0975418	-0.0941491	-0.0651675	-0.0915475	0.0775653	-0.074942	-0.0799923	-0.0698029	-0.0784143	-0.0767016	-0.108839
BC005624:ENSMUST00000028205.9	0.0891295	0.0926404	0.0834474	-0.102433	-0.0829098	-0.101816	0.0765553	-0.0748055	0.117341	-0.0713382	-0.0948817	-0.0596034	-0.0643475	-0.0960925	-0.0678201	-0.062536	-0.0809136	-0.0792161	-0.076948	-0.0821538	-0.0849925	-0.0734852	-0.109222	0.0688638	0.1009	-0.088941	-0.0686583	-0.0849752	0.0811581	-0.0832067	-0.0772269	-0.0674371	-0.0747445	-0.0664743	-0.0977843
Atp6v1c1:ENSMUST00000022904.7	0.193876	0.174216	0.186588	-0.197012	-0.193078	-0.212967	0.15427	-0.21846	0.219125	-0.141946	-0.223137	-0.14066	-0.17091	-0.203329	-0.191669	-0.180528	-0.167826	-0.191075	-0.197863	-0.249249	-0.144135	-0.184618	-0.217149	0.123969	0.191367	-0.200251	-0.15752	-0.180066	0.184484	-0.134817	-0.166466	-0.165735	-0.169467	-0.138765	-0.186791
Zfand5:ENSMUST00000237651.1	0.0514477	0.0479509	0.0538134	-0.0546124	-0.0412931	-0.0544116	0.0477913	-0.0455186	0.0564037	-0.0302219	-0.0430226	-0.049183	-0.0419739	-0.0533741	-0.0644617	-0.0485666	-0.0346028	-0.053351	-0.0584963	-0.0599627	-0.0426694	-0.0517383	-0.0637663	0.0335238	0.0552216	-0.0480171	-0.0448209	-0.0535987	0.0481855	-0.0321301	-0.0418922	-0.0492981	-0.0518515	-0.0362735	-0.0520599
Mindy3:ENSMUST00000028105.12	0.135371	0.134488	0.125053	-0.125178	-0.103875	-0.159262	0.118839	-0.109517	0.166037	-0.110987	-0.123514	-0.102735	-0.125038	-0.141314	-0.116964	-0.0969602	-0.106067	-0.126135	-0.106871	-0.155519	-0.109393	-0.114417	-0.155046	0.108471	0.154284	-0.124233	-0.100736	-0.139715	0.127331	-0.129268	-0.107152	-0.118165	-0.125149	-0.109721	-0.150638
1500009L16Rik:ENSMUST00000150459.2	0.124224	0.145776	0.147349	-0.146665	-0.117629	-0.175823	0.133317	-0.136058	0.167966	-0.126295	-0.131908	-0.0907948	-0.118553	-0.141711	-0.105219	-0.109655	-0.122672	-0.127831	-0.12765	-0.161603	-0.115639	-0.131582	-0.177967	0.11011	0.164565	-0.117051	-0.115262	-0.139857	0.14222	-0.119692	-0.122796	-0.125693	-0.0972121	-0.098432	-0.140093
Uqcc1:ENSMUST00000109632.7	0.0693628	0.079086	0.0735081	-0.0854965	-0.0849732	-0.0870328	0.0702019	-0.067476	0.108366	-0.0526621	-0.0817059	-0.0475781	-0.0580552	-0.0875785	-0.0438366	-0.0540025	-0.0783999	-0.0831315	-0.082957	-0.0828285	-0.0574526	-0.0674413	-0.0923286	0.0383818	0.084784	-0.0698483	-0.0663315	-0.0773279	0.0650821	-0.0573753	-0.0437679	-0.0619548	-0.066601	-0.0580363	-0.090129
Coq3:ENSMUST00000029909.2	0.107239	0.0990123	0.0827076	-0.0981257	-0.0479947	-0.0958701	0.0725416	-0.0912806	0.105598	-0.0671203	-0.0779949	-0.0449983	-0.0779018	-0.0783655	-0.0719392	-0.0720062	-0.076051	-0.0752958	-0.0862445	-0.0929232	-0.0534705	-0.0609659	-0.108768	0.0687829	0.0839772	-0.0848685	-0.0770691	-0.099385	0.0852068	-0.0630573	-0.0792925	-0.0671066	-0.0967839	-0.0655911	-0.0726964
Vma21:ENSMUST00000114577.7	0.088903	0.0899774	0.0969905	-0.101	-0.0865507	-0.111167	0.0817606	-0.0887989	0.110231	-0.0623859	-0.105203	-0.0619585	-0.0737581	-0.104039	-0.0762102	-0.078316	-0.080642	-0.105094	-0.106386	-0.118904	-0.0796292	-0.0862199	-0.120488	0.0550182	0.102249	-0.0952449	-0.0806415	-0.0913049	0.0744051	-0.0725548	-0.0778417	-0.0772558	-0.0808072	-0.066246	-0.0975071
Eif4a1:ENSMUST00000163666.2	0.221682	0.208201	0.192551	-0.221801	-0.189541	-0.261853	0.177797	-0.196579	0.272265	-0.169762	-0.242722	-0.1414	-0.187725	-0.210568	-0.15881	-0.176328	-0.189135	-0.213122	-0.174671	-0.260366	-0.171778	-0.198075	-0.254597	0.139428	0.247862	-0.199126	-0.164969	-0.197089	0.196539	-0.182793	-0.165101	-0.154457	-0.167978	-0.176987	-0.232668
Lyrm9:ENSMUST00000147875.8	0.176579	0.172423	0.156549	-0.206739	-0.172963	-0.209584	0.156548	-0.197219	0.221196	-0.167137	-0.154954	-0.125917	-0.171545	-0.190327	-0.153966	-0.137887	-0.158417	-0.194544	-0.178143	-0.218575	-0.158297	-0.166682	-0.228407	0.129442	0.209541	-0.180831	-0.159379	-0.196978	0.131691	-0.129411	-0.149398	-0.169014	-0.160254	-0.157115	-0.170587
Elovl4:ENSMUST00000034796.13	0.0788235	0.0575613	0.0537564	-0.0637658	-0.0575781	-0.0767573	0.0631513	-0.045845	0.0716385	-0.0585499	-0.0597091	-0.0512506	-0.024551	-0.0680478	-0.0633625	-0.0690703	-0.0481848	-0.0674435	-0.0686379	-0.0602499	-0.0546553	-0.0575131	-0.0784972	0.047872	0.0713328	-0.0666578	-0.0506417	-0.0740944	0.0558437	-0.059103	-0.0547797	-0.040303	-0.0625238	-0.0608091	-0.0607588
Cinp:ENSMUST00000043716.8	0.0949721	0.0857727	0.0877504	-0.0874495	-0.0878966	-0.105752	0.0700017	-0.0884074	0.108862	-0.0804116	-0.0831522	-0.0599518	-0.0824589	-0.0924189	-0.0748297	-0.0718216	-0.0830773	-0.100315	-0.0832671	-0.109819	-0.0675044	-0.0801143	-0.107465	0.0709652	0.0981676	-0.0744371	-0.0690415	-0.0939904	0.0724559	-0.0590871	-0.0849115	-0.0792821	-0.0759289	-0.0719999	-0.0670615
Fkbp4:ENSMUST00000032508.10	0.11059	0.0975167	0.0900866	-0.102981	-0.0753467	-0.116227	0.0920585	-0.0945331	0.128649	-0.0697598	-0.134852	-0.0463522	-0.0693636	-0.0963576	-0.0665171	-0.0762553	-0.0917492	-0.0961551	-0.0820943	-0.110166	-0.0743731	-0.0855454	-0.108106	0.064178	0.123755	-0.0988224	-0.0822279	-0.10047	0.0862679	-0.0797019	-0.0751786	-0.069836	-0.0735016	-0.0677541	-0.103068
Thap1:ENSMUST00000036807.12	0.125645	0.111635	0.097864	-0.112667	-0.0961009	-0.145414	0.0976499	-0.109357	0.132849	-0.0870691	-0.112495	-0.0922818	-0.0991693	-0.086092	-0.0924697	-0.104949	-0.103199	-0.119068	-0.118992	-0.137622	-0.078253	-0.107464	-0.139691	0.0624477	0.118094	-0.110206	-0.0915031	-0.111208	0.0842384	-0.0756218	-0.0939113	-0.0924841	-0.0829137	-0.102374	-0.105753
Rab3d:ENSMUST00000115351.9	0.0609128	0.0416579	0.0602493	-0.0352027	-0.038642	-0.0347418	0.0677514	-0.0225779	0.0693799	-0.0235551	-0.0476566	-0.0459962	-0.061294	-0.0569578	-0.0328686	-0.0217935	-0.0470164	-0.0396823	-0.0520058	-0.0463043	-0.0279348	-0.0418618	-0.0483579	0.0701981	0.0461377	-0.056495	-0.025632	-0.0429771	0.0448961	-0.0663855	-0.0127136	-0.0709756	-0.0238043	-0.0246195	-0.0733092
Slc25a17:ENSMUST00000023040.8	0.107349	0.0868393	0.085676	-0.0804338	-0.0745178	-0.111319	0.0835693	-0.0597597	0.109472	-0.0757358	-0.116983	-0.0630413	-0.0788455	-0.0733643	-0.0436265	-0.0762828	-0.078267	-0.0737317	-0.0591221	-0.0636404	-0.062748	-0.0653855	-0.1001	0.0724819	0.09986	-0.0621575	-0.0630849	-0.0945973	0.0732814	-0.071782	-0.0652387	-0.0666802	-0.0674184	-0.0878139	-0.0989004
2810004N23Rik:ENSMUST00000034465.8	0.157676	0.134899	0.117964	-0.15543	-0.121069	-0.178973	0.119459	-0.156531	0.179818	-0.101163	-0.15695	-0.0837543	-0.122258	-0.125187	-0.109531	-0.110545	-0.121494	-0.153141	-0.143364	-0.178758	-0.0946785	-0.135156	-0.165768	0.116466	0.169265	-0.128745	-0.122885	-0.144243	0.116619	-0.0916464	-0.113571	-0.106712	-0.111523	-0.125852	-0.103291
Rpp14:ENSMUST00000023924.3	0.100525	0.0921275	0.0854829	-0.0902694	-0.0778561	-0.112926	0.0904085	-0.0948088	0.114629	-0.0732721	-0.0952115	-0.0784803	-0.0967611	-0.102595	-0.066809	-0.0747239	-0.0682212	-0.0926859	-0.081502	-0.108929	-0.0717951	-0.085871	-0.115301	0.0816727	0.0968195	-0.0872486	-0.0783933	-0.0898738	0.0819985	-0.066432	-0.0738115	-0.0686448	-0.0850807	-0.0849986	-0.0866925
Leprotl1:ENSMUST00000033910.8	0.189768	0.163052	0.163237	-0.175583	-0.141424	-0.19936	0.154657	-0.144454	0.203568	-0.146441	-0.17311	-0.131113	-0.148416	-0.172514	-0.125368	-0.150103	-0.144091	-0.171029	-0.161427	-0.203271	-0.138278	-0.158999	-0.195199	0.138933	0.194589	-0.163183	-0.121815	-0.17088	0.147616	-0.137377	-0.139927	-0.145673	-0.146731	-0.130841	-0.164841
Szrd1:ENSMUST00000102487.3	0.108908	0.0923352	0.0958937	-0.0947657	-0.0822474	-0.115662	0.0869441	-0.0980071	0.121115	-0.0841017	-0.10003	-0.0623506	-0.0972413	-0.10805	-0.0937502	-0.0840311	-0.0890747	-0.0971852	-0.0884366	-0.126754	-0.0534464	-0.0903049	-0.11679	0.0773382	0.113565	-0.0801135	-0.0859135	-0.0909107	0.0799237	-0.0521399	-0.0933477	-0.0841288	-0.0857489	-0.058329	-0.0731457
Wdr48:ENSMUST00000215307.1	0.0663103	0.0781296	0.0610462	-0.0896496	-0.0620472	-0.0883574	0.065375	-0.0764094	0.0897193	-0.0757854	-0.0918414	-0.072731	-0.0859523	-0.0735239	-0.0611826	-0.065261	-0.0693362	-0.0700137	-0.0814721	-0.103191	-0.064731	-0.0916482	-0.0797021	0.0594986	0.0866464	-0.079324	-0.070197	-0.0692348	0.0465465	-0.0360227	-0.0676638	-0.0735895	-0.0736926	-0.0547165	-0.0721459
Reep1:ENSMUST00000121469.1	0.0581798	0.0476686	0.0726907	-0.0809208	-0.0599274	-0.102203	0.0698083	-0.0636841	0.0853543	-0.0751462	-0.0690811	-0.0605958	-0.0520894	-0.0685187	-0.0531682	-0.0766279	-0.0672346	-0.0721222	-0.0753016	-0.0781455	-0.0508891	-0.0762431	-0.0874976	0.0386636	0.0691948	-0.0937358	-0.073589	-0.0762494	0.0482021	-0.0800701	-0.0578063	-0.0667069	-0.0530669	-0.0659851	-0.112519
Ddx42:ENSMUST00000021046.5	0.0734845	0.0692108	0.0592146	-0.0894409	-0.0677855	-0.0800753	0.0653327	-0.0788333	0.0750761	-0.0637101	-0.0820765	-0.0546402	-0.0594035	-0.0715672	-0.0466799	-0.0767111	-0.0505469	-0.0608048	-0.0682609	-0.0800336	-0.052735	-0.0668839	-0.0958398	0.0411849	0.0753171	-0.0616752	-0.059033	-0.0767488	0.080578	-0.0651123	-0.0715711	-0.0567689	-0.0699946	-0.0519432	-0.0481917
Wdr4:ENSMUST00000171171.8	0.140272	0.11051	0.122105	-0.13338	-0.122616	-0.153009	0.109329	-0.15442	0.150961	-0.121986	-0.137606	-0.0813014	-0.127517	-0.130594	-0.109177	-0.120727	-0.114892	-0.142613	-0.136186	-0.178428	-0.096286	-0.122487	-0.162452	0.0980355	0.132073	-0.125064	-0.120459	-0.129093	0.0963409	-0.0521629	-0.111898	-0.119016	-0.121631	-0.0951745	-0.109134
Riok3:ENSMUST00000025270.7	0.108474	0.0905589	0.085733	-0.0921792	-0.0838943	-0.110763	0.102165	-0.0922149	0.110959	-0.0792493	-0.101482	-0.0899349	-0.0965693	-0.0936139	-0.0735501	-0.103565	-0.084526	-0.084088	-0.0873567	-0.124329	-0.0837466	-0.0851256	-0.127262	0.0688812	0.109661	-0.0778788	-0.0806339	-0.106869	0.0654358	-0.0738852	-0.0978912	-0.101914	-0.0877272	-0.0890383	-0.0818177
Kctd5:ENSMUST00000017090.5	0.114221	0.0865115	0.09164	-0.103901	-0.0836095	-0.121273	0.0968727	-0.0941521	0.117648	-0.0804444	-0.0813981	-0.0820623	-0.0972775	-0.102595	-0.0782007	-0.0970824	-0.0764798	-0.105317	-0.0966888	-0.118636	-0.0800383	-0.0969903	-0.126889	0.0913293	0.0973349	-0.0695938	-0.0856829	-0.0901883	0.0808936	-0.0535625	-0.0845293	-0.0834832	-0.0890866	-0.0721506	-0.0835463
Zfp655:ENSMUST00000199322.4	0.0872498	0.0618139	0.081775	-0.0966026	-0.0547481	-0.0724105	0.0750003	-0.0766479	0.0948093	-0.0654199	-0.05268	-0.0811351	-0.0801874	-0.0793005	-0.0813427	-0.0683172	-0.0597312	-0.0961126	-0.0646954	-0.101803	-0.0464675	-0.0940324	-0.0927674	0.0852753	0.091821	-0.0663226	-0.0807333	-0.0770871	0.0825235	-0.0810783	-0.0725184	-0.0781512	-0.0724242	-0.0590098	-0.0514032
Rnf115:ENSMUST00000029740.13	0.0784527	0.0781876	0.0742091	-0.0699617	-0.066041	-0.0841385	0.0632521	-0.071105	0.0792406	-0.0533992	-0.0819985	-0.0504925	-0.0824888	-0.0660039	-0.046728	-0.0648029	-0.067377	-0.0670854	-0.0628688	-0.0896279	-0.0621028	-0.0571902	-0.0970513	0.0571779	0.0847665	-0.0609821	-0.0597813	-0.0614393	0.0863634	-0.0455495	-0.0632545	-0.0621793	-0.0695375	-0.0489944	-0.0625504
Mdp1:ENSMUST00000002400.6	0.12854	0.12629	0.119187	-0.119085	-0.0992832	-0.146893	0.132443	-0.118671	0.157805	-0.108465	-0.121736	-0.0884281	-0.104762	-0.123939	-0.10276	-0.0881615	-0.111339	-0.125597	-0.114574	-0.153784	-0.0999618	-0.105239	-0.158982	0.107928	0.149688	-0.113794	-0.112755	-0.140991	0.111248	-0.104888	-0.105375	-0.11024	-0.120922	-0.0986116	-0.104665
Hyal1:ENSMUST00000010195.13	0.225795	0.225401	0.217593	-0.246429	-0.173838	-0.265203	0.189811	-0.180738	0.271902	-0.175751	-0.231987	-0.111651	-0.182645	-0.225656	-0.151997	-0.160058	-0.163293	-0.191996	-0.178993	-0.248574	-0.177009	-0.17361	-0.231658	0.191981	0.258722	-0.180039	-0.158747	-0.202397	0.175374	-0.176587	-0.188645	-0.161844	-0.160644	-0.161038	-0.201077
Mkrn1:ENSMUST00000114823.7	0.123982	0.103078	0.108442	-0.105422	-0.0807929	-0.130246	0.106213	-0.0977037	0.10731	-0.0940998	-0.104925	-0.0904298	-0.114512	-0.110605	-0.0908546	-0.115335	-0.075456	-0.0996127	-0.0821295	-0.126919	-0.0920829	-0.111179	-0.137649	0.0849956	0.122822	-0.0978668	-0.0872569	-0.0982258	0.0857193	-0.0967579	-0.0853871	-0.0871701	-0.0790464	-0.0817932	-0.118985
Pitpnb:ENSMUST00000086635.8	0.132372	0.109826	0.105327	-0.112813	-0.108137	-0.131001	0.122173	-0.103628	0.124887	-0.0935217	-0.107878	-0.0884278	-0.100052	-0.115142	-0.0911729	-0.095676	-0.0988534	-0.11551	-0.128063	-0.136259	-0.0874711	-0.105815	-0.135662	0.0916451	0.118055	-0.109901	-0.0934907	-0.125258	0.0981971	-0.0817804	-0.0961622	-0.103639	-0.10299	-0.090563	-0.100337
Sorbs1:ENSMUST00000226047.1	0.0624503	0.0589257	0.059603	-0.0404197	-0.0630311	-0.0553824	0.0503345	-0.0491509	0.0810556	-0.0214472	-0.0504841	-0.0256272	-0.0428601	-0.0448983	-0.0461576	-0.0392294	-0.0449273	-0.0421745	-0.0663041	-0.0396948	-0.028725	-0.0518247	-0.0285356	0.0654975	0.0650862	-0.0673669	-0.0294229	-0.069637	0.0270314	-0.0667417	-0.0376524	-0.0591852	-0.0713696	-0.0154514	-0.0739067
Aptx:ENSMUST00000068125.10	0.150998	0.102401	0.12899	-0.13976	-0.135725	-0.155177	0.13118	-0.128331	0.146569	-0.0898241	-0.103285	-0.101404	-0.124483	-0.152937	-0.108013	-0.121278	-0.101182	-0.128091	-0.124286	-0.161344	-0.0944875	-0.122467	-0.166242	0.10245	0.148683	-0.113834	-0.100229	-0.12375	0.121533	-0.105732	-0.142826	-0.122007	-0.115673	-0.104174	-0.122089
Tmed4:ENSMUST00000004508.12	0.0849326	0.0783228	0.0684302	-0.0903454	-0.0802005	-0.113252	0.0638938	-0.0809564	0.118162	-0.0649477	-0.0987213	-0.0572215	-0.0532046	-0.0733071	-0.0554173	-0.068356	-0.074022	-0.0904279	-0.0768095	-0.0975898	-0.0557536	-0.0774194	-0.0982568	0.0471426	0.106401	-0.089071	-0.0682782	-0.0674378	0.0682551	-0.0807626	-0.0705477	-0.0564813	-0.0649649	-0.0794109	-0.10279
Coq4:ENSMUST00000028137.9	0.115095	0.0740198	0.0800638	-0.123322	-0.0989207	-0.133441	0.0812141	-0.133996	0.134874	-0.096036	-0.142445	-0.0584458	-0.103419	-0.124052	-0.0850965	-0.0950423	-0.106591	-0.111161	-0.10444	-0.135556	-0.0808013	-0.104788	-0.144566	0.0718714	0.108959	-0.106264	-0.0977656	-0.106625	0.0848186	-0.0611359	-0.105075	-0.0999599	-0.100127	-0.105686	-0.0904019
Gpm6b:ENSMUST00000112235.7	0.0896392	0.0852842	0.0918139	-0.0988815	-0.0711386	-0.129972	0.0929646	-0.0578482	0.144522	-0.0734388	-0.106388	-0.0414658	-0.0278051	-0.10153	-0.0400117	-0.0264655	-0.0815604	-0.0903385	-0.0673316	-0.0774114	-0.0709387	-0.0766145	-0.105002	0.0664628	0.137382	-0.0944833	-0.0634518	-0.0856482	0.0685933	-0.140163	-0.0727371	-0.03898	-0.0571548	-0.0735971	-0.134147
Cdc42se1:ENSMUST00000053872.11	0.0865696	0.0733144	0.0728894	-0.0891026	-0.0771013	-0.101032	0.053721	-0.0839399	0.112284	-0.0683706	-0.0911296	-0.0578957	-0.0682039	-0.0889284	-0.0616795	-0.0733118	-0.0631305	-0.0783544	-0.0808421	-0.104225	-0.0683301	-0.0717099	-0.0970686	0.0602027	0.0844475	-0.0649379	-0.0740768	-0.0907261	0.0678808	-0.0558197	-0.0731273	-0.084029	-0.0757273	-0.063049	-0.0780176
Eif1:ENSMUST00000049385.13	0.1848	0.161764	0.160612	-0.179675	-0.146835	-0.218143	0.151472	-0.181432	0.217802	-0.136738	-0.181802	-0.107894	-0.153874	-0.170327	-0.123647	-0.141227	-0.144642	-0.169891	-0.145817	-0.215793	-0.139356	-0.156352	-0.215382	0.126575	0.211609	-0.160039	-0.137646	-0.166151	0.121979	-0.156895	-0.142412	-0.132327	-0.125725	-0.143889	-0.194683
Srp19:ENSMUST00000072576.9	0.156792	0.0914274	0.146481	-0.13558	-0.155578	-0.163003	0.120895	-0.158357	0.15287	-0.10663	-0.143792	-0.118754	-0.125208	-0.144675	-0.149855	-0.158185	-0.11483	-0.144059	-0.193798	-0.204917	-0.0833378	-0.124601	-0.179015	0.0919666	0.126819	-0.133381	-0.13071	-0.135793	0.113848	-0.069809	-0.125829	-0.144569	-0.14516	-0.122524	-0.12604
Actr1b:ENSMUST00000043951.9	0.0672508	0.0512349	0.0536572	-0.065535	-0.0512059	-0.0807007	0.0534219	-0.0753756	0.0752872	-0.0477709	-0.0616675	-0.0334458	-0.0584186	-0.0713572	-0.0639492	-0.0548718	-0.0556841	-0.0507612	-0.0607554	-0.0805476	-0.0561932	-0.0540268	-0.0762188	0.04416	0.0695609	-0.0562027	-0.065345	-0.0695948	0.0450436	-0.0432617	-0.0712013	-0.0524226	-0.0500553	-0.0500569	-0.0535228
Borcs5:ENSMUST00000062755.9	0.128866	0.0784645	0.0890813	-0.0943953	-0.0879878	-0.118319	0.0943246	-0.0662392	0.128263	-0.0801075	-0.114234	-0.0627572	-0.0906572	-0.0992861	-0.0715608	-0.0910102	-0.0657317	-0.103051	-0.0741831	-0.0990426	-0.0818524	-0.0865303	-0.118975	0.0823727	0.122727	-0.0994477	-0.0587337	-0.0826636	0.0996249	-0.0936659	-0.0760501	-0.0732441	-0.0834019	-0.0816033	-0.0998973
Macir:ENSMUST00000053033.13	0.0827104	0.0758744	0.0589443	-0.0817636	-0.0676385	-0.0845521	0.0535803	-0.0924838	0.0718018	-0.0680258	-0.0882034	-0.0590949	-0.0813247	-0.086866	-0.0686489	-0.087578	-0.0743671	-0.0747465	-0.072889	-0.117847	-0.0711327	-0.0731464	-0.114166	0.0552085	0.0802087	-0.0807964	-0.0753566	-0.0987855	0.0593838	-0.057561	-0.0649461	-0.0895421	-0.0893223	-0.0504458	-0.0712308
Map4k4:ENSMUST00000168431.6	0.0580561	0.033517	0.0457201	-0.0558949	-0.0634558	-0.0764178	0.0561736	-0.0513593	0.0701016	-0.0307223	-0.061674	-0.0453905	-0.0349499	-0.0640989	-0.0398063	-0.0542679	-0.03936	-0.0660253	-0.0517202	-0.0639044	-0.0457625	-0.0473062	-0.0661577	0.0361637	0.0647069	-0.0569319	-0.0438421	-0.0493019	0.0577979	-0.0487806	-0.0457389	-0.0392477	-0.0475073	-0.0525535	-0.0731834
Tm9sf2:ENSMUST00000026624.10	0.207	0.151013	0.205851	-0.199475	-0.204008	-0.223048	0.154234	-0.201718	0.223381	-0.157651	-0.21771	-0.148328	-0.186511	-0.18797	-0.195889	-0.209668	-0.171004	-0.195397	-0.231506	-0.24389	-0.115569	-0.175119	-0.22287	0.129277	0.189734	-0.163285	-0.163916	-0.17603	0.164267	-0.102582	-0.194576	-0.173683	-0.172544	-0.173354	-0.170853
Pnisr:ENSMUST00000108229.1	0.186011	0.153441	0.148828	-0.18721	-0.165807	-0.206858	0.123596	-0.16766	0.201302	-0.138355	-0.208108	-0.0970879	-0.139342	-0.161839	-0.114707	-0.159702	-0.168397	-0.183472	-0.171412	-0.170009	-0.106576	-0.149921	-0.196315	0.121311	0.17899	-0.182833	-0.151803	-0.182257	0.149226	-0.101206	-0.158133	-0.175706	-0.147353	-0.118594	-0.16478
Coa6:ENSMUST00000059093.6	0.0816447	0.0707032	0.0737462	-0.0970212	-0.075794	-0.106144	0.0478972	-0.0965265	0.0995806	-0.0657278	-0.100782	-0.0448286	-0.0749365	-0.0787624	-0.0584777	-0.0590099	-0.0791514	-0.0874245	-0.0792281	-0.102133	-0.0553034	-0.0657089	-0.0952424	0.0562789	0.0989639	-0.0668614	-0.075086	-0.0836318	0.0583372	-0.0568053	-0.0675077	-0.0647859	-0.0618662	-0.0558534	-0.0812767
Ubap2l:ENSMUST00000064639.14	0.0733442	0.080763	0.0872521	-0.128607	-0.0868448	-0.0980724	0.0707703	-0.0935437	0.0996121	-0.06406	-0.0972482	-0.0476255	-0.0754309	-0.0975764	-0.0650091	-0.0785931	-0.0766608	-0.0749039	-0.0747035	-0.106419	-0.0659609	-0.0767803	-0.0794659	0.0737936	0.0804366	-0.0930395	-0.0697182	-0.0812718	0.072871	-0.0510665	-0.0736539	-0.0681582	-0.0747835	-0.0555261	-0.0818134
Rbmx:ENSMUST00000098470.8	0.0787296	0.113538	0.0715697	-0.106168	-0.0823476	-0.118698	0.0767169	-0.120243	0.0986204	-0.0772892	-0.10532	-0.0653409	-0.0993297	-0.106772	-0.0817476	-0.0734599	-0.098675	-0.0998876	-0.0835677	-0.121407	-0.0902745	-0.0830361	-0.139064	0.0428273	0.108243	-0.0866827	-0.0992059	-0.103652	0.061092	-0.085037	-0.0953885	-0.0938682	-0.093564	-0.0819476	-0.101021
Pex19:ENSMUST00000111252.3	-0.0046151	0.00330796	0.00389334	-0.00500739	-0.0138568	-0.01828	-0.0040939	-0.0288152	0.0217315	-0.000443045	-0.021704	0.00173466	0.00210418	-0.00503969	-0.00781891	-0.0140505	-0.02302	-0.0171772	-0.0269427	-0.0219361	-0.00386268	-0.00473795	-0.00899096	-0.0217809	0.0118131	-0.0139505	-0.0225576	0.00599063	-0.0105441	0.00327154	0.00543073	-0.00875138	0.00729209	-0.000392929	-0.01478
Ddx27:ENSMUST00000018143.15	0.112753	0.089654	0.0746587	-0.126169	-0.0588811	-0.110668	0.0712032	-0.118327	0.13234	-0.104001	-0.185575	-0.0265059	-0.127996	-0.104478	-0.0450517	-0.0653307	-0.111879	-0.100209	-0.0111445	-0.105616	-0.0811571	-0.0980956	-0.124742	0.0808333	0.138167	-0.0963572	-0.0917115	-0.0804667	0.117771	-0.0548856	-0.0934704	-0.0806908	-0.0844585	-0.0333203	-0.0828934
Huwe1:ENSMUST00000026292.14	0.119744	0.118952	0.10965	-0.119431	-0.101706	-0.136197	0.104319	-0.116348	0.13336	-0.0973615	-0.129588	-0.086552	-0.107837	-0.131689	-0.105305	-0.129437	-0.102811	-0.113964	-0.13033	-0.151229	-0.099317	-0.112501	-0.138434	0.0800694	0.117943	-0.0936727	-0.100992	-0.132791	0.103832	-0.0813507	-0.112683	-0.114872	-0.10159	-0.0849951	-0.108468
Rpp38:ENSMUST00000062672.6	0.114614	0.119996	0.0940942	-0.123187	-0.0997444	-0.114368	0.075221	-0.113217	0.1355	-0.0868489	-0.135293	-0.0643711	-0.0973175	-0.115637	-0.0775349	-0.0848127	-0.103393	-0.0712663	-0.0981867	-0.130138	-0.0835261	-0.0894446	-0.119617	0.0772437	0.115262	-0.0511494	-0.087204	-0.11006	0.10757	-0.093578	-0.0936644	-0.076195	-0.0979942	-0.0869029	-0.104303
Gtf2f2:ENSMUST00000088922.4	0.126335	0.130355	0.128516	-0.121717	-0.0981269	-0.143898	0.106081	-0.125679	0.152256	-0.089233	-0.135216	-0.0782442	-0.129764	-0.113805	-0.0764573	-0.110283	-0.0962392	-0.111961	-0.0851342	-0.141554	-0.0986298	-0.0968275	-0.138788	0.0969328	0.127466	-0.0767595	-0.0821264	-0.10198	0.11848	-0.0806783	-0.0763837	-0.0852034	-0.0898912	-0.0997275	-0.111442
Uqcc3:ENSMUST00000096253.6	0.0579162	0.0747357	0.0684704	-0.0684745	-0.0409962	-0.0774765	0.0571828	-0.0604993	0.0826434	-0.0407537	-0.0708059	-0.0403863	-0.0587891	-0.0581222	-0.0444251	-0.0472991	-0.0429519	-0.0590371	-0.0469687	-0.0728673	-0.0437809	-0.0557333	-0.0605271	0.0432325	0.0762762	-0.0566617	-0.0479399	-0.0557932	0.0681369	-0.0383986	-0.0301902	-0.0363761	-0.0535466	-0.0531023	-0.061852
Dcaf7:ENSMUST00000058438.8	0.231586	0.135467	0.161116	-0.171349	-0.145484	-0.201002	0.154721	-0.156899	0.202258	-0.160998	-0.168483	-0.135182	-0.169927	-0.177724	-0.164768	-0.14573	-0.127535	-0.154492	-0.158935	-0.210724	-0.140267	-0.161462	-0.205776	0.165597	0.175804	-0.158111	-0.145329	-0.182444	0.132411	-0.128549	-0.156052	-0.151684	-0.14275	-0.15261	-0.151872
Arl4a:ENSMUST00000146905.1	0.0832599	0.0797815	0.0767343	-0.0989186	-0.0710468	-0.111721	0.0806728	-0.06516	0.0988466	-0.0625926	-0.0684753	-0.0889026	-0.0884821	-0.0873596	-0.0623908	-0.0544186	-0.0659399	-0.0913782	-0.0667697	-0.0950449	-0.0781775	-0.0791105	-0.112339	0.0778021	0.0939496	-0.0880176	-0.0538796	-0.0845033	0.060777	-0.0631174	-0.0602624	-0.0878993	-0.0774874	-0.0768429	-0.0782754
Ino80c:ENSMUST00000055012.11	0.147782	0.134699	0.152589	-0.157558	-0.155757	-0.169011	0.148904	-0.156417	0.168919	-0.125129	-0.168576	-0.117396	-0.125754	-0.156173	-0.105502	-0.142498	-0.145636	-0.158891	-0.145542	-0.185394	-0.119848	-0.133042	-0.194401	0.125558	0.158451	-0.146388	-0.134627	-0.150511	0.112871	-0.0714935	-0.13069	-0.139586	-0.147263	-0.115148	-0.127615
Coa7:ENSMUST00000131656.1	0.0920342	0.0703169	0.0664868	-0.091201	-0.065283	-0.0985281	0.080544	-0.0897954	0.0973944	-0.0713697	-0.0867177	-0.0774535	-0.0995324	-0.0832097	-0.0604014	-0.0725188	-0.0770397	-0.0976859	-0.0683831	-0.107425	-0.0763504	-0.0771905	-0.106128	0.0733746	0.0972552	-0.0880999	-0.0785924	-0.0917199	0.0746172	-0.0600158	-0.0860725	-0.0804709	-0.0704014	-0.0751543	-0.0637294
Ccdc174:ENSMUST00000037783.6	0.0791003	0.0780479	0.0809807	-0.0572169	-0.0497619	-0.0541526	0.0758745	-0.0591408	0.0727909	-0.0638439	-0.0412948	-0.0466471	-0.0764937	-0.0389104	-0.0242577	-0.0484544	-0.070155	-0.0714883	-0.0412885	-0.0849532	-0.0462363	-0.0598473	-0.0822801	0.0481132	0.0694262	-0.0354808	-0.0518192	-0.0434041	0.0594344	-0.0308853	-0.0443911	-0.0610824	-0.0463659	-0.0463615	-0.0616532
Ttc14:ENSMUST00000099153.9	0.0363092	0.0144012	0.0188467	-0.0289738	-0.0209481	-0.0152473	0.0100385	-0.034934	0.0270956	-0.0264337	-0.0351842	-0.0134664	-0.0194758	-0.0332999	-0.0293869	-0.0292568	-0.0161651	-0.0196779	-0.00871417	-0.0396159	-0.0302868	-0.0286576	-0.0340469	0.00977467	0.023536	-0.0197604	-0.0248154	-0.0356102	0.0114931	-0.00581639	-0.0214765	-0.0243848	-0.00679585	-0.0165807	-0.0111323
Mkrn2:ENSMUST00000000449.8	0.0465567	0.0430603	0.0578697	-0.0607488	-0.0572695	-0.0717616	0.0492416	-0.0755402	0.0724741	-0.042776	-0.0564347	-0.00956222	-0.0205272	-0.0700485	-0.0480704	-0.0549096	-0.0569687	-0.048918	-0.0452602	-0.0699948	-0.0432558	-0.0533549	-0.0771478	0.0369495	0.0587882	-0.0589666	-0.0633962	-0.0347994	0.0122651	-0.0451714	-0.0452105	-0.0503316	-0.041047	-0.0470529	-0.0537131
Cnot8:ENSMUST00000108843.7	0.106056	0.08979	0.0996095	-0.100357	-0.0829012	-0.119295	0.084155	-0.101624	0.116065	-0.0767713	-0.0989278	-0.0697157	-0.0962192	-0.0984205	-0.0796729	-0.0939889	-0.0822743	-0.102523	-0.0937391	-0.126834	-0.0757641	-0.0881472	-0.128176	0.0800906	0.103706	-0.0933517	-0.0921633	-0.0987642	0.0787606	-0.0758263	-0.0916226	-0.0803263	-0.079518	-0.0858444	-0.108526
Kctd20:ENSMUST00000233197.1	0.129142	0.0979913	0.119078	-0.139687	-0.113137	-0.13719	0.112764	-0.129486	0.134474	-0.0992989	-0.13017	-0.0881353	-0.141103	-0.130998	-0.0970985	-0.127095	-0.10115	-0.120554	-0.129095	-0.160788	-0.0991932	-0.124774	-0.160734	0.0864363	0.121504	-0.108596	-0.114109	-0.124756	0.0841424	-0.0671428	-0.116483	-0.125112	-0.119938	-0.114301	-0.105743
Nkapd1:ENSMUST00000145139.7	0.104998	0.106551	0.12102	-0.116153	-0.125397	-0.151173	0.12042	-0.17591	0.135254	-0.100247	-0.101193	-0.130505	-0.122647	-0.109804	-0.149112	-0.162693	-0.0949199	-0.143438	-0.168925	-0.227024	-0.0912032	-0.111703	-0.144279	0.0722523	0.109892	-0.108823	-0.113523	-0.123352	0.121001	-0.0501553	-0.112279	-0.135664	-0.143446	-0.127442	-0.132494
Nudt4:ENSMUST00000020217.6	0.0829218	0.0667679	0.0732739	-0.0830541	-0.0842263	-0.0957836	0.0596659	-0.0962794	0.104164	-0.0586177	-0.0867995	-0.0539056	-0.0723917	-0.0839031	-0.0765114	-0.0687906	-0.0787834	-0.084532	-0.10128	-0.10215	-0.0509827	-0.0755604	-0.0953565	0.0501448	0.0788641	-0.0666553	-0.0667974	-0.094721	0.0543262	-0.0418064	-0.0665484	-0.0853088	-0.0772862	-0.0601914	-0.0619875
Prrc2b:ENSMUST00000036691.13	0.0660421	0.065353	0.0612025	-0.0829007	-0.0701195	-0.0850902	0.0561314	-0.0716878	0.0793437	-0.054049	-0.0627817	-0.04568	-0.0678351	-0.0696011	-0.0501	-0.0676761	-0.0628971	-0.0660904	-0.0709517	-0.0891002	-0.0515661	-0.0745108	-0.0926596	0.0384149	0.0829874	-0.0639717	-0.057143	-0.0689126	0.0379259	-0.0446133	-0.0610637	-0.061251	-0.0737454	-0.0517091	-0.0647648
Gatd1:ENSMUST00000106008.2	0.0921035	0.0713463	0.0881677	-0.0833231	-0.0731425	-0.0947455	0.0834353	-0.0730586	0.0974455	-0.0737333	-0.0870867	-0.0575623	-0.0715691	-0.0952261	-0.0620081	-0.0712002	-0.066061	-0.0830856	-0.0698808	-0.0997761	-0.0719437	-0.0754731	-0.111285	0.0765524	0.099456	-0.0713428	-0.0713864	-0.0744199	0.0767428	-0.0677113	-0.0743901	-0.0750873	-0.0826742	-0.0754499	-0.0819605
Snx5:ENSMUST00000028909.4	-0.0186662	-0.000610756	-0.0114493	0.0350264	0.00387553	0.0047069	-0.0296756	-0.0213471	0.0126695	0.00985984	-0.0363054	0.0209561	0.0267588	0.035059	0.0192809	0.0106661	-0.0312913	0.0226446	-0.0377291	-0.0205795	0.0159145	0.0173796	0.0391987	-0.0371203	-0.0159427	0.0397942	-0.0069561	0.0315655	0.0344774	0.0258491	0.0705433	0.0328608	0.0339464	0.0320718	-0.00544085
Kif23:ENSMUST00000034815.8	0.0630185	0.0716401	0.0373015	-0.0884404	-0.0780975	-0.119248	-0.0133513	-0.14033	0.135719	-0.0673787	-0.14264	0.0532993	-0.110112	-0.0680804	0.0255426	-0.0691317	-0.0820479	-0.0545183	-0.0749756	-0.156957	-0.0240886	-0.0682474	-0.0743722	0.0233425	0.0706884	-0.0445059	-0.0855832	-0.0387378	0.0503982	0.026857	-0.0146366	-0.062733	-0.0429194	-0.0389663	-0.0193764
Csnk1d:ENSMUST00000070575.13	0.204326	0.187939	0.192775	-0.21402	-0.179227	-0.247007	0.180724	-0.205188	0.241966	-0.156188	-0.217143	-0.116946	-0.184223	-0.202904	-0.151656	-0.19748	-0.178033	-0.209733	-0.213681	-0.259413	-0.142057	-0.188297	-0.244476	0.154816	0.212249	-0.200699	-0.173276	-0.203357	0.169416	-0.115823	-0.172465	-0.169253	-0.169521	-0.161948	-0.179261
H1f0:ENSMUST00000180086.2	0.13226	0.104304	0.117733	-0.119682	-0.113072	-0.154473	0.112118	-0.135268	0.145551	-0.0979644	-0.125653	-0.0869772	-0.104523	-0.122365	-0.0956561	-0.136171	-0.103176	-0.134926	-0.136969	-0.162856	-0.0892101	-0.120377	-0.155563	0.0907779	0.129048	-0.134723	-0.113776	-0.121804	0.0836116	-0.0634067	-0.106659	-0.114687	-0.111769	-0.103141	-0.110288
Nav1:ENSMUST00000040599.14	0.120924	0.0647765	0.0942961	-0.0937	-0.0921214	-0.126084	0.103432	-0.0822626	0.121798	-0.0679995	-0.0820905	-0.0734929	-0.0970207	-0.10322	-0.0760708	-0.106236	-0.0633273	-0.106423	-0.104507	-0.103855	-0.0697442	-0.104073	-0.116374	0.0776723	0.0985467	-0.095019	-0.0772542	-0.0918883	0.0741866	-0.079369	-0.091413	-0.0960917	-0.0902494	-0.0912711	-0.122091
Nras:ENSMUST00000029445.12	0.114935	0.0715354	0.0845383	-0.11104	-0.0901221	-0.11506	0.085623	-0.104621	0.112526	-0.062917	-0.10116	-0.0765638	-0.101869	-0.112654	-0.0812485	-0.110372	-0.0874637	-0.113653	-0.109362	-0.127885	-0.0756041	-0.0998514	-0.1292	0.086822	0.097819	-0.100374	-0.096806	-0.107875	0.0672649	-0.0369743	-0.0824295	-0.0979599	-0.0887832	-0.0706122	-0.0792139
Brcc3:ENSMUST00000033544.13	0.0720003	0.0366766	0.0719227	-0.0670861	-0.069358	-0.0689504	0.0620012	-0.061029	0.0761922	-0.0380149	-0.0702887	-0.0443454	-0.0539277	-0.0694862	-0.0730293	-0.0663809	-0.0531393	-0.0643453	-0.0859022	-0.0799914	-0.0402962	-0.0619756	-0.0788777	0.0511	0.0698573	-0.0840641	-0.0637331	-0.0628262	0.0672498	-0.0431223	-0.0638744	-0.0631029	-0.0713383	-0.0583819	-0.0467353
Tardbp:ENSMUST00000084125.9	0.0597313	0.0417998	0.0479085	-0.0528806	-0.048104	-0.0685754	0.0450743	-0.0590133	0.065616	-0.0412514	-0.0657036	-0.0306857	-0.0702246	-0.0520031	-0.0353628	-0.0546139	-0.0537606	-0.0518334	-0.0550541	-0.0706467	-0.0435959	-0.0546536	-0.0775595	0.0527674	0.0589054	-0.0381117	-0.0422121	-0.0539224	0.0384464	-0.0216968	-0.049554	-0.0644657	-0.0612841	-0.0408947	-0.0393021
Arl4c:ENSMUST00000159814.1	0.0906024	0.0788566	0.0779612	-0.0863407	-0.0810718	-0.105556	0.0717379	-0.102336	0.089296	-0.0660168	-0.0868943	-0.072131	-0.0988813	-0.0902011	-0.0846845	-0.117525	-0.0747841	-0.0971705	-0.0947088	-0.118969	-0.0624315	-0.0846264	-0.0997701	0.0498298	0.077314	-0.075433	-0.0751991	-0.0901595	0.0617801	-0.0398884	-0.0811682	-0.081741	-0.0863606	-0.0746681	-0.0768969
Dut:ENSMUST00000051605.8	0.0759106	0.0545616	0.056175	-0.0735487	-0.059517	-0.0743846	0.0366522	-0.084831	0.0770833	-0.0478984	-0.131018	-0.016048	-0.0763094	-0.0688696	-0.0456372	-0.0596962	-0.0649641	-0.0717942	-0.0687202	-0.101605	-0.0378001	-0.057705	-0.0730961	0.037096	0.0652804	-0.0592566	-0.0591431	-0.0469358	0.119686	-0.00433118	-0.046433	-0.0534566	-0.0608697	-0.0383461	-0.0421532
Sccpdh:ENSMUST00000040538.9	0.0969437	0.070567	0.0866554	-0.0871575	-0.0780821	-0.112746	0.0842321	-0.0896586	0.104879	-0.0623865	-0.127439	-0.0463629	-0.0630727	-0.0923225	-0.0754233	-0.0836799	-0.090343	-0.0857892	-0.105535	-0.100259	-0.0544898	-0.0760726	-0.0955525	0.0489749	0.0922322	-0.0863856	-0.0949763	-0.0781913	0.0806529	-0.0614993	-0.0788208	-0.070799	-0.0820018	-0.0798872	-0.100146
Mrpl18:ENSMUST00000079121.3	0.142553	0.0984959	0.128426	-0.143771	-0.142807	-0.163088	0.0920672	-0.164592	0.145048	-0.083128	-0.136549	-0.0900335	-0.160279	-0.138527	-0.103991	-0.167479	-0.118879	-0.141202	-0.144716	-0.206674	-0.0836333	-0.12626	-0.1641	0.0877468	0.123176	-0.13076	-0.115442	-0.123023	0.061223	-0.0490537	-0.127641	-0.122131	-0.117392	-0.133084	-0.132911
Ak6:ENSMUST00000022135.14	0.0740211	0.0509363	0.0724121	-0.0738984	-0.0853349	-0.0946486	0.0545313	-0.0721974	0.0873509	-0.0468516	-0.072173	-0.0608257	-0.0912891	-0.0693796	-0.0697944	-0.0772688	-0.0623133	-0.0742917	-0.0785026	-0.105208	-0.0446759	-0.0701413	-0.0892095	0.0553338	0.0745525	-0.0671579	-0.0518383	-0.058266	0.0676936	-0.0382563	-0.0469797	-0.0713985	-0.057867	-0.0484022	-0.0631484
Cyb5r3:ENSMUST00000162834.2	0.0632822	0.0530593	0.0674239	-0.0718782	-0.0770255	-0.0825019	0.0451119	-0.0654267	0.0852563	-0.0497917	-0.0822809	-0.0191509	-0.0310417	-0.07381	-0.0527514	-0.0806662	-0.0632016	-0.0881139	-0.0994371	-0.0761814	-0.0386648	-0.0738262	-0.0857156	0.020222	0.063342	-0.0670593	-0.0602198	-0.0568064	0.0566764	-0.036038	-0.0586732	-0.0631167	-0.0525555	-0.0401123	-0.0799511
Carhsp1:ENSMUST00000008537.9	0.0450051	0.0592021	0.0523991	-0.0660953	-0.0691975	-0.0859339	0.0347415	-0.0810836	0.0840223	-0.0517222	-0.0742569	-0.0359651	-0.0349604	-0.0591578	-0.0368125	-0.0625428	-0.0690797	-0.0791759	-0.0820492	-0.0851597	-0.0365545	-0.061872	-0.0874348	0.0162738	0.0683012	-0.0572679	-0.0597226	-0.0613053	0.0319001	-0.0451006	-0.0512466	-0.0530418	-0.0477676	-0.0517479	-0.0852684
Ptrhd1:ENSMUST00000179139.2	0.150395	0.132914	0.133563	-0.167893	-0.175013	-0.196928	0.108263	-0.176353	0.214471	-0.120707	-0.206032	-0.0718917	-0.116386	-0.144619	-0.10441	-0.146889	-0.153435	-0.171846	-0.185124	-0.210706	-0.11201	-0.128026	-0.185404	0.0826809	0.165622	-0.154891	-0.135761	-0.134294	0.14937	-0.110076	-0.124751	-0.119186	-0.126921	-0.125805	-0.169756
Mtfr1:ENSMUST00000130645.7	0.0514948	0.0390166	0.0575499	-0.0694188	-0.0798662	-0.0877343	0.0247408	-0.107478	0.0834896	-0.0505539	-0.0917395	-0.0144299	-0.062082	-0.0723738	-0.0445893	-0.0753775	-0.0853295	-0.0910977	-0.108724	-0.114498	-0.0279529	-0.0723708	-0.083138	0.0152571	0.0621472	-0.0700303	-0.0761698	-0.0662652	0.0287509	-0.0141407	-0.0645485	-0.066352	-0.0552244	-0.047702	-0.0634791
Rbm26:ENSMUST00000163545.7	0.0301259	0.0379938	0.0341919	-0.0543334	-0.0497849	-0.0503011	0.00727988	-0.0572897	0.0345611	-0.0255163	-0.0729429	-0.00311251	-0.0288102	-0.0420023	-0.018725	-0.0430272	-0.0428957	-0.0324615	-0.0363106	-0.0568907	-0.00148137	-0.050444	-0.0546815	0.00346864	0.0467061	-0.0253135	-0.0259952	-0.0409197	0.00583262	-0.0311815	-0.0298158	-0.0386902	-0.010467	-0.0274758	-0.0338549
Slu7:ENSMUST00000020681.9	0.0735373	0.0595035	0.0646891	-0.0513538	-0.0692307	-0.0827353	0.079203	-0.065325	0.0813415	-0.0483395	-0.0935314	-0.0535322	-0.0623432	-0.0714005	-0.0421046	-0.0544432	-0.0678868	-0.0555715	-0.0784325	-0.0893733	-0.0493439	-0.0648467	-0.0623505	0.0597864	0.069761	-0.0482888	-0.0480809	-0.0431408	0.0775706	-0.0353253	-0.0546307	-0.0563443	-0.0517823	-0.0484413	-0.0616983
H3c6:ENSMUST00000105107.1	0.155742	0.157206	0.144347	-0.143339	-0.113938	-0.163454	0.133481	-0.149904	0.182428	-0.102785	-0.130673	-0.0579588	-0.118646	-0.136897	-0.136212	-0.10802	-0.116943	-0.116382	-0.147324	-0.173287	-0.088405	-0.101761	-0.180405	0.114318	0.167208	-0.0732027	-0.117878	-0.134097	0.0536747	-0.073505	-0.114609	-0.126122	-0.109117	-0.104822	-0.103839
Rgma:ENSMUST00000119206.2	0.054082	0.0700932	0.0598575	-0.0658542	-0.0899892	-0.108833	0.0240324	-0.0998691	0.092517	-0.0473178	-0.10239	-0.00666222	-0.0349727	-0.0805532	-0.0498309	-0.0589041	-0.0838739	-0.0763863	-0.0862696	-0.106024	-0.0397621	-0.0633559	-0.0847006	0.0151075	0.0836951	-0.0617269	-0.0772131	-0.0572501	0.0381187	-0.0505493	-0.0436455	-0.0413891	-0.0382694	-0.0348972	-0.0695216
Trp53bp1:ENSMUST00000110647.7	0.0360861	0.0786449	0.0673512	-0.0547151	-0.0403033	-0.0872191	0.0372614	-0.0695242	0.0500028	-0.0327853	-0.0803874	-0.0381157	-0.0532276	-0.0623703	-0.0502478	-0.0585343	-0.0536053	-0.0562345	-0.0570465	-0.0767818	-0.0504254	-0.0607606	-0.0717032	0.00685842	0.0377464	-0.0569459	-0.0433015	-0.0389685	0.0250553	-0.0248282	-0.0405856	-0.0429597	-0.0352236	-0.035063	-0.057249
Etf1:ENSMUST00000025218.7	0.118653	0.105459	0.108531	-0.120104	-0.106771	-0.142926	0.0932054	-0.127295	0.136199	-0.0985089	-0.124086	-0.0601857	-0.101665	-0.116182	-0.0959163	-0.111011	-0.11141	-0.112302	-0.131314	-0.151558	-0.0721455	-0.102732	-0.1409	0.0796071	0.112302	-0.128911	-0.0974625	-0.116693	0.096421	-0.05762	-0.0907861	-0.0932062	-0.106408	-0.0840284	-0.0917884
Trappc5:ENSMUST00000044857.3	0.0730971	0.0657845	0.0817991	-0.0709713	-0.0680547	-0.0933615	0.0710362	-0.065888	0.0787829	-0.0582968	-0.0840006	-0.0609891	-0.0675496	-0.0870358	-0.0472661	-0.0707684	-0.06784	-0.06932	-0.0795621	-0.0938116	-0.0581362	-0.0777635	-0.0944953	0.0484845	0.0736311	-0.0685947	-0.0712875	-0.0800725	0.0646285	-0.0488752	-0.0657568	-0.0818318	-0.0795991	-0.0707392	-0.0610111
Epc1:ENSMUST00000050542.5	0.0770477	0.0751306	0.096979	-0.0647526	-0.0553352	-0.0955207	0.0790628	-0.101476	0.084964	-0.0609621	-0.0679971	-0.0721191	-0.10134	-0.0785849	-0.081519	-0.122993	-0.0500546	-0.0740376	-0.0575616	-0.112212	-0.0924355	-0.086943	-0.0954753	0.0998199	0.0709036	-0.0526195	-0.0661851	-0.0940661	0.0356589	-0.0547534	-0.0540786	-0.0690462	-0.0588249	-0.0716797	-0.0569808
Smarcc1:ENSMUST00000197984.4	0.0393963	0.0130477	0.0126556	-0.0381387	-0.0549534	-0.043378	0.0159216	-0.0158738	0.0393973	-0.0266089	-0.0469108	-0.0220469	-0.0400849	-0.0381597	-0.0342114	-0.062286	-0.0572088	-0.0501392	-0.0676075	-0.036797	-0.0304217	-0.0289057	-0.0524238	0.0135683	0.0312323	-0.0402824	-0.0443215	-0.0284472	0.00382937	0.0193035	-0.0372906	-0.0606576	-0.0296303	-0.028145	-0.0362015
Cggbp1:ENSMUST00000067744.7	0.0488272	0.0535948	0.0508271	-0.0465176	-0.0547235	-0.063574	0.0435757	-0.0639055	0.0515511	-0.0519314	-0.0510564	-0.0385659	-0.0551527	-0.0459122	-0.0477562	-0.0835808	-0.046665	-0.0644399	-0.0729937	-0.0820065	-0.0340982	-0.0573127	-0.0636207	0.0390986	0.0533412	-0.0519279	-0.048851	-0.0605564	0.0380358	-0.0081149	-0.0534685	-0.0421739	-0.0390005	-0.0349121	-0.0342165
Mul1:ENSMUST00000044058.10	0.0474942	0.0445104	0.0337014	-0.0537516	-0.0547575	-0.0621418	0.0229042	-0.0692268	0.0688842	-0.0251815	-0.055531	-0.036382	-0.0618903	-0.0570251	-0.033047	-0.0565721	-0.0597884	-0.0600764	-0.0582702	-0.0817092	-0.0441004	-0.0479418	-0.0570931	0.0162009	0.0326414	-0.0313848	-0.0397033	-0.0384803	0.0421183	0.00812446	-0.0617356	-0.037818	-0.0405716	-0.046335	-0.0210783
Dnajc1:ENSMUST00000166495.7	0.00216671	-0.00946139	0.00461549	-0.0243012	-0.0189549	-0.0201411	0.000331045	-0.00459416	0.0199052	8.83622e-05	-0.00965897	0.00382181	-0.0152129	-0.0117221	0.0170003	-0.0112265	0.0110525	0.0152858	0.0105536	-0.0103622	0.00407139	-0.0139951	-0.00143842	0.0101893	0.00239443	-0.00281854	-0.00598817	-0.0140813	0.00786666	-0.011795	-0.00348598	0.0142717	0.0118296	-0.00236867	-0.00346368
Vrk1:ENSMUST00000085026.11	0.147043	0.113866	0.150345	-0.114455	-0.0885829	-0.159655	0.121584	-0.0994201	0.168474	-0.11571	-0.179068	-0.0148029	-0.118356	-0.113184	-0.045484	-0.127388	-0.126178	-0.113107	-0.112539	-0.107719	-0.0918261	-0.122655	-0.151087	0.101964	0.132119	-0.082584	-0.0866764	-0.119881	0.0865242	-0.0331986	-0.0849864	-0.0868903	-0.0903677	-0.0792327	-0.104495
Scnm1:ENSMUST00000172572.8	0.0347078	0.0223949	0.0308394	-0.0480801	-0.025762	-0.0488704	0.0101384	-0.0490794	0.0378395	-0.0237457	-0.0992426	0.00816047	-0.0400563	-0.0301058	-0.0266945	-0.034778	-0.0396209	-0.0318341	-0.0379326	-0.0375978	-0.0320662	-0.0322628	-0.0457914	0.00830794	0.0255059	-0.0352693	-0.0271908	-0.0294736	0.0819859	-0.00717437	-0.0188147	-0.0277663	-0.0331761	-0.0191016	-0.0277564
Pnrc1:ENSMUST00000049357.9	0.0845233	0.0639433	0.0763393	-0.0890036	-0.100729	-0.111303	0.056485	-0.0951993	0.0975426	-0.0536686	-0.117358	-0.0331229	-0.076571	-0.101736	-0.0637432	-0.116353	-0.0897422	-0.0952198	-0.0903659	-0.12469	-0.0531296	-0.0941102	-0.10461	0.0403339	0.0888089	-0.0973097	-0.0753002	-0.0784681	0.0681179	-0.0163264	-0.0773056	-0.0782611	-0.0618763	-0.0598424	-0.0662428
Ttc3:ENSMUST00000231569.1	0.0759845	0.0655322	0.0552075	-0.0758874	-0.0604311	-0.0840938	0.0619679	-0.0683266	0.090124	-0.0550186	-0.0767194	-0.0414746	-0.0749989	-0.0707551	-0.0445649	-0.0630763	-0.0652807	-0.0725977	-0.0554186	-0.0925395	-0.0541949	-0.069991	-0.0802465	0.0405476	0.0738773	-0.0770905	-0.0508911	-0.0601838	0.0689357	-0.0331372	-0.0529705	-0.0589847	-0.0526105	-0.0373119	-0.0578657
Ubl4a:ENSMUST00000155676.7	0.0821907	0.0751294	0.0568519	-0.0894834	-0.0599804	-0.0917986	0.070338	-0.0902996	0.0917754	-0.0654817	-0.0829822	-0.0445621	-0.0772066	-0.0760288	-0.0588855	-0.0813315	-0.0692834	-0.0912946	-0.0856116	-0.109317	-0.0624779	-0.0749217	-0.101784	0.0407446	0.0853868	-0.0614658	-0.08423	-0.0827497	0.0561993	-0.0268801	-0.0642365	-0.0780755	-0.0657759	-0.0685097	-0.053298
Slc25a4:ENSMUST00000034049.4	0.171295	0.093463	0.13945	-0.135497	-0.122695	-0.170122	0.13559	-0.132298	0.155519	-0.108841	-0.128982	-0.0996305	-0.116679	-0.133904	-0.117591	-0.163538	-0.0993355	-0.145156	-0.123157	-0.170426	-0.110673	-0.131278	-0.187963	0.127895	0.153479	-0.138119	-0.110813	-0.130013	0.104515	-0.123963	-0.115811	-0.121303	-0.115185	-0.121401	-0.13366
Tmem14c:ENSMUST00000021790.6	0.0844083	0.0477082	0.0639573	-0.0734574	-0.0603221	-0.0791513	0.0492314	-0.0810364	0.0749961	-0.0426466	-0.135849	-0.0455974	-0.070182	-0.0665977	-0.0601891	-0.0848348	-0.0550582	-0.0629296	-0.060542	-0.0876163	-0.0480273	-0.0558328	-0.0832886	0.0531185	0.0619401	-0.0670962	-0.0666272	-0.0505272	0.11285	-0.0287266	-0.045567	-0.0570622	-0.0651559	-0.0396994	-0.0456739
Nova2:ENSMUST00000032571.9	0.0460257	0.0150283	0.0277979	-0.0288448	-0.0122892	-0.0470285	0.0175665	-0.0433528	0.0437261	-0.0211466	-0.0183247	0.00597221	-0.00828187	-0.020072	-0.0067445	-0.0208931	-0.0281227	-0.0313877	-0.0294739	-0.0270662	-0.0215079	-0.0468038	-0.0513205	0.0263661	0.0273108	-0.0287648	-0.00491564	-0.00396843	0.00880571	-0.00368945	-0.0508535	-0.00760699	-0.0120191	-0.0371478	-0.0383806
Psmd12:ENSMUST00000021063.12	0.0203196	0.0263398	0.0176075	-0.0282183	-0.0372701	-0.0326489	0.015092	-0.0314374	0.0338399	-0.0282145	-0.0360512	-0.0171083	-0.0352317	-0.028395	-0.00834112	-0.0364853	-0.033542	-0.0326485	-0.0368898	-0.0552958	-0.0123084	-0.0275225	-0.0365156	0.00605552	0.0342886	-0.0325284	-0.0314215	-0.0209579	0.0430475	0.00215142	-0.0141257	-0.0306003	-0.0256701	-0.00671542	-0.00715955
Hnrnpab:ENSMUST00000074669.9	0.0138949	0.00278012	0.0020264	-0.0024178	-0.0101398	-0.0156496	-0.00231368	-0.0212094	0.0104722	-0.00159509	-0.0217635	-0.000556029	-0.0126114	-0.00768624	-0.00516861	-0.0148657	-0.014043	-0.00722778	-0.0167285	-0.0181913	-0.00634193	-0.00848996	-0.0194091	-0.003857	0.000485383	-0.00265604	-0.0180195	-0.0122087	0.00481351	0.0156434	-0.00842052	-0.0075865	-0.00672687	-0.00698618	0.00523582
Ogdh:ENSMUST00000003461.14	0.0387157	0.0447743	0.0271029	-0.0495746	-0.0345545	-0.0518704	0.0338477	-0.062029	0.0408572	-0.0521645	-0.0671901	-0.0291287	-0.0587968	-0.0567669	-0.050766	-0.0540629	-0.042324	-0.0538856	-0.0576329	-0.0671556	-0.0255157	-0.06542	-0.0496122	0.0210813	0.0273057	-0.0400552	-0.0468022	-0.0458845	0.0252319	-0.00889683	-0.0319616	-0.0390821	-0.0334714	-0.0279052	-0.0356807
Syncrip:ENSMUST00000069221.11	0.0402357	0.0272527	0.0318055	-0.048085	-0.0281232	-0.0367003	0.0276097	-0.0562129	0.0341134	-0.0267128	-0.0419493	-0.0181957	-0.0365404	-0.033196	-0.0386067	-0.0557223	-0.0304428	-0.0288238	-0.0585931	-0.0667674	-0.0223228	-0.0422164	-0.0423734	0.0101299	0.0262216	-0.0344333	-0.0368074	-0.0337493	0.020022	-0.00419239	-0.0290678	-0.0405399	-0.0343481	-0.0220833	-0.0290328
Pkia:ENSMUST00000028999.11	0.00550748	0.012118	0.00824661	-0.0257048	-0.030129	-0.0278295	0.00175684	-0.0270539	0.0359833	-0.017544	-0.0245971	-0.0099221	-0.0159265	-0.0155969	-0.0131015	-0.0187941	-0.0223708	-0.0293859	-0.0413834	-0.0284894	-0.00907001	-0.0246911	-0.023032	-0.0135706	0.0223186	-0.0354128	-0.0128294	-0.0226639	0.0289334	0.0160121	-0.0122088	-0.0155807	-0.021347	-0.0138693	-0.00798569
Pdha1:ENSMUST00000033662.8	0.106223	0.0781288	0.0925624	-0.0927729	-0.0800226	-0.109025	0.0878615	-0.0833967	0.110654	-0.080622	-0.0864618	-0.0843331	-0.0869053	-0.0937655	-0.0758828	-0.0748783	-0.074375	-0.0961717	-0.100205	-0.117096	-0.0747817	-0.0817651	-0.104418	0.0803052	0.100993	-0.0916173	-0.0781036	-0.0915268	0.0890911	-0.0601876	-0.0731442	-0.0869534	-0.0883154	-0.0726757	-0.0804189
Csnk1g3:ENSMUST00000069597.7	0.0878954	0.0731633	0.0707563	-0.068336	-0.0558163	-0.0782577	0.0681736	-0.0724731	0.0713112	-0.0535228	-0.0603144	-0.0603732	-0.0781122	-0.0764912	-0.0612474	-0.0658851	-0.0539836	-0.0568806	-0.0529516	-0.0951355	-0.0602215	-0.0645226	-0.0912876	0.0743592	0.0760201	-0.056233	-0.0702511	-0.0848212	0.048904	-0.0375657	-0.0611929	-0.0742269	-0.0509866	-0.0637184	-0.0477305
Cd2bp2:ENSMUST00000166791.7	0.114685	0.108047	0.100901	-0.111299	-0.0785259	-0.125941	0.115252	-0.101998	0.120359	-0.0795547	-0.101654	-0.0793515	-0.0990394	-0.11078	-0.090849	-0.0986098	-0.0843476	-0.112592	-0.108456	-0.131085	-0.103167	-0.0969881	-0.129413	0.0860431	0.113011	-0.101172	-0.0861385	-0.111991	0.0940971	-0.0698971	-0.0837894	-0.0815308	-0.0950218	-0.0814142	-0.0803602
Gng2:ENSMUST00000160013.7	0.0907755	0.0649546	0.0622586	-0.0723585	-0.0474096	-0.0805524	0.0779135	-0.0785698	0.0782266	-0.0544945	-0.0557496	-0.055786	-0.0891944	-0.0751435	-0.0555654	-0.0840141	-0.0521986	-0.062281	-0.0568438	-0.0900154	-0.071322	-0.078941	-0.0921503	0.0545576	0.0781177	-0.0575955	-0.0559176	-0.074307	0.0588336	-0.0512759	-0.0721883	-0.0706674	-0.0707762	-0.0675368	-0.0663048
Bend5:ENSMUST00000030274.6	0.109651	0.075363	0.0938061	-0.0866955	-0.0474235	-0.0880956	0.091483	-0.117291	0.0848626	-0.0634047	-0.0565585	-0.0835268	-0.132338	-0.088689	-0.0797366	-0.111869	-0.0579029	-0.0854087	-0.0457612	-0.140481	-0.0821244	-0.107605	-0.103617	0.087208	0.0916224	-0.0787285	-0.05556	-0.0843941	0.0905824	-0.0724973	-0.0606569	-0.0767594	-0.0885573	-0.0702984	-0.0888639
Crbn:ENSMUST00000013882.9	0.0948173	0.0944949	0.0888365	-0.0782094	-0.0683683	-0.0957742	0.0975364	-0.0593254	0.0994088	-0.0658367	-0.0742486	-0.0697011	-0.0913851	-0.0680744	-0.0715343	-0.0774083	-0.0528689	-0.0653851	-0.0685144	-0.100961	-0.0834921	-0.0673564	-0.0847885	0.0602999	0.102318	-0.0596802	-0.0709018	-0.082376	0.0781028	-0.0615827	-0.0728178	-0.0700127	-0.0634369	-0.0579025	-0.0748607
Desi1:ENSMUST00000152227.7	0.0632012	0.0562273	0.0447096	-0.0643062	-0.0364336	-0.0752138	0.051577	-0.0521019	0.0547436	-0.0523795	-0.0713103	-0.0402497	-0.0500505	-0.0582065	-0.0433039	-0.0477733	-0.0257303	-0.0588836	-0.0750324	-0.0684974	-0.059356	-0.0616667	-0.0647895	0.0283063	0.0595383	-0.0463055	-0.0497635	-0.0684649	0.0285227	-0.0310453	-0.0316409	-0.0472268	-0.0464525	-0.0545944	-0.0569096
Mrps23:ENSMUST00000024486.13	0.0692773	0.0589432	0.0618669	-0.0538055	-0.0367129	-0.0690811	0.0904285	-0.052835	0.0819841	-0.0497436	-0.0577925	-0.0564918	-0.0794035	-0.0576248	-0.0428753	-0.0457301	-0.0448079	-0.062493	-0.0377744	-0.0737672	-0.0617212	-0.0523051	-0.0777474	0.0661956	0.0651421	-0.053339	-0.0345189	-0.0740505	0.065403	-0.0484343	-0.0307304	-0.0502683	-0.0475023	-0.0531483	-0.042304
Cbx8:ENSMUST00000026663.7	0.0721821	0.0562848	0.0528872	-0.0670721	-0.0615159	-0.0725073	0.0652419	-0.0504665	0.0598924	-0.0640597	-0.0500529	-0.0412911	-0.0823981	-0.0669548	-0.0664667	-0.0568029	-0.0334343	-0.0535457	-0.0526136	-0.0662356	-0.0400408	-0.0618528	-0.0646595	0.0449916	0.0758574	-0.0459365	-0.0434206	-0.0508992	0.054078	-0.032567	-0.0396268	-0.0535069	-0.0408785	-0.0549094	-0.0517066
Ube2j1:ENSMUST00000124992.7	0.119768	0.121331	0.112216	-0.11826	-0.0938541	-0.134067	0.121375	-0.0955774	0.123445	-0.0993628	-0.101442	-0.0885645	-0.12097	-0.117614	-0.105258	-0.0939956	-0.0745791	-0.0988822	-0.10154	-0.133941	-0.0996546	-0.0980859	-0.149243	0.106868	0.128603	-0.10508	-0.0965886	-0.124978	0.10408	-0.0795617	-0.10829	-0.106645	-0.110285	-0.0862409	-0.0893963
Trappc13:ENSMUST00000144060.7	0.129959	0.1144	0.0929409	-0.124488	-0.0940915	-0.12939	0.110669	-0.0982887	0.122028	-0.0932984	-0.111096	-0.100361	-0.0969582	-0.115683	-0.100099	-0.0804894	-0.077629	-0.111478	-0.109822	-0.125135	-0.100292	-0.105612	-0.144089	0.11583	0.122863	-0.113132	-0.0920055	-0.119026	0.0944025	-0.0706207	-0.107599	-0.105271	-0.105125	-0.0962032	-0.0888638
Srsf7:ENSMUST00000063417.10	0.137453	0.127724	0.12811	-0.131112	-0.0921486	-0.136925	0.134763	-0.100473	0.127021	-0.107336	-0.093213	-0.12287	-0.130022	-0.120258	-0.106288	-0.107967	-0.0808237	-0.123586	-0.0988062	-0.138166	-0.111867	-0.109582	-0.161942	0.118386	0.140668	-0.112535	-0.0981725	-0.132507	0.118165	-0.0963626	-0.104267	-0.114077	-0.115175	-0.0939988	-0.103716
Gmfb:ENSMUST00000111817.7	0.105975	0.101478	0.094318	-0.107548	-0.0808856	-0.129865	0.105818	-0.0943349	0.113624	-0.10104	-0.0853269	-0.0828532	-0.103784	-0.0973892	-0.0960129	-0.0884054	-0.0689868	-0.105078	-0.0958635	-0.118924	-0.087676	-0.0951346	-0.130384	0.0819965	0.101102	-0.0958997	-0.0885284	-0.104915	0.0882768	-0.0718352	-0.0747724	-0.0893647	-0.0895717	-0.0652999	-0.0720201
Zfand3:ENSMUST00000226208.2	0.107175	0.0875567	0.0760959	-0.0938424	-0.0927665	-0.117226	0.0832592	-0.10732	0.113344	-0.0687327	-0.10593	-0.0587393	-0.0913617	-0.0843887	-0.077764	-0.0859596	-0.0670945	-0.09299	-0.0902338	-0.125759	-0.0688037	-0.0809617	-0.121337	0.068464	0.0953033	-0.0756029	-0.0687398	-0.0948371	0.0735271	-0.0439414	-0.0786473	-0.0848542	-0.0821468	-0.0750215	-0.0787262
D430019H16Rik:ENSMUST00000178224.1	0.11795	0.0645148	0.0737023	-0.0751053	-0.0795768	-0.109768	0.101559	-0.0794872	0.100929	-0.0575832	-0.0663572	-0.0887921	-0.090472	-0.0896473	-0.0788679	-0.0955868	-0.0585586	-0.0706324	-0.0653215	-0.10008	-0.0820956	-0.0976377	-0.114712	0.0722721	0.104565	-0.0889473	-0.0535501	-0.0874566	0.0798979	-0.088663	-0.0805244	-0.0861134	-0.0798989	-0.0601515	-0.107795
Akap8:ENSMUST00000002699.6	0.103192	0.0944222	0.0773905	-0.0910915	-0.0761047	-0.114666	0.0937079	-0.105569	0.107107	-0.0868109	-0.109308	-0.0802609	-0.109141	-0.117264	-0.0948641	-0.0936584	-0.0846842	-0.110777	-0.0890565	-0.123443	-0.0866574	-0.103316	-0.122739	0.0905399	0.104988	-0.0925819	-0.0885616	-0.0957053	0.088462	-0.0593949	-0.0947944	-0.0987731	-0.0866049	-0.086978	-0.0772048
Slc39a3:ENSMUST00000117276.10	0.127692	0.0734626	0.0836734	-0.105133	-0.0823541	-0.108137	0.108502	-0.0863076	0.109651	-0.0812797	-0.0768764	-0.0765466	-0.104396	-0.102713	-0.0924303	-0.0840502	-0.0728806	-0.100631	-0.0818753	-0.120847	-0.0999403	-0.0914892	-0.132999	0.100782	0.119307	-0.125307	-0.0826612	-0.104904	0.0882849	-0.0812552	-0.073977	-0.106206	-0.0838148	-0.0843923	-0.108799
Spag9:ENSMUST00000041956.13	0.0827952	0.0764523	0.0729244	-0.0838902	-0.0537179	-0.0787822	0.0872903	-0.0800931	0.0978546	-0.07074	-0.066037	-0.0616045	-0.0679214	-0.0808848	-0.0559768	-0.0556991	-0.0694961	-0.0594235	-0.0579043	-0.0904131	-0.0749803	-0.0928393	-0.0977273	0.0679812	0.0865954	-0.0685806	-0.033051	-0.0825278	0.0651587	-0.0521953	-0.0679882	-0.0859734	-0.0597865	-0.0548106	-0.0676609
Akt3:ENSMUST00000111160.8	0.104356	0.0702005	0.0693253	-0.0843823	-0.0429499	-0.0862598	0.0742367	-0.0812168	0.0880438	-0.0633363	-0.065087	-0.0783987	-0.0989671	-0.0733676	-0.0649349	-0.074421	-0.0577981	-0.0725608	-0.0526939	-0.106948	-0.0806222	-0.0758401	-0.0937079	0.0917751	0.0926191	-0.0556192	-0.0692152	-0.0969987	0.0373592	-0.0712973	-0.0622392	-0.0746868	-0.0745137	-0.0567076	-0.0866747
Nars:ENSMUST00000237400.1	0.173093	0.147239	0.147647	-0.171444	-0.122372	-0.185605	0.15231	-0.125638	0.193153	-0.127131	-0.136756	-0.1118	-0.137558	-0.148518	-0.127725	-0.12506	-0.119517	-0.152831	-0.133253	-0.177623	-0.13239	-0.138777	-0.191165	0.140107	0.175354	-0.146541	-0.118629	-0.151185	0.141884	-0.126991	-0.131475	-0.138679	-0.13871	-0.122322	-0.14235
Mcmbp:ENSMUST00000057557.13	0.0829758	0.043161	0.0520043	-0.0883993	-0.0677945	-0.100241	0.0479201	-0.0711306	0.0782039	-0.0876857	-0.0910919	-0.0731928	-0.0922978	-0.101551	-0.0845897	-0.0696041	-0.0717433	-0.0814337	-0.0856078	-0.088455	-0.0627277	-0.091503	-0.0975956	0.0405838	0.0811602	-0.0843818	-0.0626708	-0.0863663	0.0379162	-0.0415032	-0.0945834	-0.0850068	-0.0799354	-0.0561509	-0.0583195
Tmem183a:ENSMUST00000049470.10	0.142129	0.105854	0.0998854	-0.12795	-0.0995445	-0.132816	0.109804	-0.10525	0.129779	-0.0986997	-0.0992503	-0.0959235	-0.108468	-0.117802	-0.0869983	-0.0990129	-0.0889718	-0.115404	-0.105811	-0.1343	-0.0900331	-0.115335	-0.135816	0.100298	0.127559	-0.110477	-0.0940486	-0.119551	0.0966976	-0.0912977	-0.0997542	-0.106752	-0.110606	-0.103028	-0.1026
Amz2:ENSMUST00000092500.10	0.0801935	0.0698376	0.0851704	-0.0697943	-0.0654098	-0.0733498	0.0864072	-0.0682913	0.0866443	-0.0671396	-0.0806813	-0.0590785	-0.0816865	-0.076552	-0.0586786	-0.0658637	-0.0547611	-0.076756	-0.0640767	-0.0868794	-0.0594876	-0.07388	-0.0730261	0.0588963	0.0822548	-0.0710552	-0.0733065	-0.0942717	0.0765061	-0.054929	-0.0534447	-0.08529	-0.0609705	-0.0614906	-0.0708015
Elp6:ENSMUST00000068071.11	0.0865059	0.0974106	0.0894231	-0.0946019	-0.076762	-0.113883	0.0896972	-0.0970655	0.107045	-0.0694526	-0.093398	-0.0874307	-0.0934764	-0.0998212	-0.0774074	-0.0883235	-0.07738	-0.0963464	-0.0977577	-0.110482	-0.0847192	-0.0793967	-0.114806	0.0720265	0.103142	-0.0864916	-0.0743298	-0.0971725	0.0740393	-0.0520074	-0.0920326	-0.0746761	-0.0943378	-0.0758027	-0.0796746
Luc7l2:ENSMUST00000161538.7	0.186115	0.144283	0.127395	-0.18315	-0.143532	-0.18632	0.143745	-0.15232	0.180594	-0.124113	-0.147893	-0.122234	-0.160202	-0.172831	-0.136896	-0.142925	-0.13132	-0.166381	-0.152977	-0.195109	-0.146612	-0.138399	-0.209495	0.136461	0.182771	-0.155548	-0.145849	-0.174376	0.126606	-0.0984601	-0.150953	-0.150917	-0.154952	-0.125977	-0.118374
Lzic:ENSMUST00000030842.7	0.120781	0.0881667	0.0891945	-0.106466	-0.0810348	-0.116497	0.0984456	-0.101108	0.117525	-0.0850748	-0.0954184	-0.0770677	-0.108095	-0.0975656	-0.103023	-0.0957866	-0.0733627	-0.0973335	-0.0855355	-0.118669	-0.087202	-0.0859399	-0.133748	0.0973025	0.116169	-0.10166	-0.0865207	-0.091696	0.0842645	-0.0790509	-0.0892744	-0.0950858	-0.0822621	-0.0750847	-0.0777313
Znrf1:ENSMUST00000171182.7	0.111255	0.0781826	0.080721	-0.0928498	-0.0743157	-0.103493	0.0924446	-0.074962	0.099898	-0.0696562	-0.0738064	-0.0831632	-0.0888894	-0.0866911	-0.0760698	-0.0887642	-0.0661235	-0.0887421	-0.0638736	-0.0990115	-0.075358	-0.0935133	-0.110759	0.0796267	0.0932134	-0.0931781	-0.0632586	-0.0975804	0.0653889	-0.0785645	-0.0690705	-0.0863397	-0.0844939	-0.0719522	-0.0873951
Selenot:ENSMUST00000107924.1	0.0976777	0.0788716	0.0811919	-0.0973681	-0.0686244	-0.0995728	0.0845407	-0.0831234	0.0881508	-0.089246	-0.077128	-0.0808981	-0.102834	-0.0990271	-0.0877137	-0.0806958	-0.0627189	-0.0876602	-0.080874	-0.101991	-0.082875	-0.0828067	-0.116915	0.0887406	0.0920876	-0.0834195	-0.0779184	-0.104028	0.0714055	-0.0607045	-0.0843915	-0.0881364	-0.0866279	-0.062045	-0.0806889
Fbxo31:ENSMUST00000059018.13	0.0653109	0.0582755	0.0489333	-0.0686894	-0.0570125	-0.0730984	0.0532664	-0.0530493	0.055353	-0.0617232	-0.0705608	-0.0464382	-0.0649651	-0.071851	-0.0461938	-0.0660457	-0.0519238	-0.0636725	-0.0626889	-0.0728461	-0.0631647	-0.0576373	-0.0732257	0.042605	0.0759657	-0.0663679	-0.0671544	-0.071461	0.0330753	-0.0455593	-0.0569108	-0.0528918	-0.0637144	-0.0524202	-0.0513659
Zfp68:ENSMUST00000110905.8	0.0619171	0.066914	0.048873	-0.0651102	-0.0576562	-0.0728684	0.0506845	-0.0624401	0.076778	-0.0423581	-0.0537047	-0.0628548	-0.0524696	-0.0672939	-0.055426	-0.0501988	-0.0395301	-0.0652321	-0.0620286	-0.0733246	-0.0524543	-0.0570919	-0.0724354	0.0506858	0.0624348	-0.0606695	-0.034618	-0.0698237	0.0674507	-0.0555979	-0.0516416	-0.0413109	-0.0544999	-0.0471321	-0.0554061
Rac1:ENSMUST00000080537.13	0.0921726	0.102459	0.0898049	-0.102559	-0.0808221	-0.113479	0.0876957	-0.0888916	0.11177	-0.0901346	-0.0913517	-0.0861158	-0.0994768	-0.10385	-0.0823355	-0.0839395	-0.080609	-0.108832	-0.0883494	-0.115831	-0.0839916	-0.0903803	-0.129346	0.0746383	0.111108	-0.0909442	-0.0799842	-0.100207	0.0789485	-0.0664415	-0.0855322	-0.0962454	-0.093056	-0.0827714	-0.0846619
Anapc1:ENSMUST00000014499.9	0.242485	0.235207	0.205492	-0.234447	-0.177498	-0.261499	0.197721	-0.209098	0.255602	-0.189064	-0.204131	-0.167463	-0.201616	-0.240354	-0.190075	-0.197811	-0.159402	-0.233326	-0.205144	-0.24878	-0.183228	-0.184169	-0.273929	0.198711	0.255364	-0.21193	-0.184618	-0.249909	0.160507	-0.141005	-0.194736	-0.194145	-0.195488	-0.181561	-0.185568
Timp2:ENSMUST00000017610.9	0.161002	0.135176	0.133645	-0.129735	-0.1058	-0.154506	0.134733	-0.140875	0.163773	-0.100596	-0.142926	-0.110908	-0.157	-0.151283	-0.114978	-0.149352	-0.117393	-0.12977	-0.133442	-0.186296	-0.111097	-0.134424	-0.179153	0.103349	0.169062	-0.13304	-0.115856	-0.146787	0.113812	-0.104283	-0.108973	-0.129042	-0.144916	-0.113597	-0.126263
Nif3l1:ENSMUST00000087521.12	0.141283	0.124352	0.120793	-0.142153	-0.126985	-0.153614	0.119215	-0.130459	0.149882	-0.0985199	-0.121765	-0.114241	-0.131081	-0.137502	-0.10815	-0.11019	-0.111404	-0.135139	-0.122981	-0.155969	-0.0959159	-0.113596	-0.159785	0.117005	0.145639	-0.116482	-0.112676	-0.139272	0.110286	-0.0854751	-0.120526	-0.11909	-0.114941	-0.111162	-0.117642
Dph3:ENSMUST00000067955.11	0.126515	0.118919	0.110857	-0.124873	-0.109915	-0.143572	0.107591	-0.125674	0.140033	-0.0963548	-0.110323	-0.102954	-0.118544	-0.126905	-0.0986139	-0.100132	-0.104851	-0.136198	-0.11806	-0.155371	-0.104798	-0.107002	-0.158599	0.0845328	0.139304	-0.113898	-0.106019	-0.136643	0.0970174	-0.0868681	-0.113134	-0.106838	-0.118602	-0.0942064	-0.106813
Get4:ENSMUST00000026976.11	0.0505323	0.0626712	0.034719	-0.0513707	-0.0436539	-0.0580825	0.055829	-0.0541452	0.0614222	-0.0565205	-0.05679	-0.0357171	-0.0488962	-0.0578659	-0.0554546	-0.0468699	-0.0468866	-0.0636527	-0.0516723	-0.0701685	-0.0539093	-0.0554681	-0.0768279	0.0385498	0.0553928	-0.0561625	-0.0477066	-0.0646749	0.0424924	-0.0201253	-0.0489282	-0.0554997	-0.0414726	-0.0531354	-0.0345946
Rab3ip:ENSMUST00000020375.6	0.0607796	0.0624389	0.0487946	-0.0585911	-0.0410934	-0.0642654	0.0585511	-0.0597545	0.0705324	-0.0526158	-0.0568567	-0.0567137	-0.0550027	-0.0509474	-0.0473997	-0.0445619	-0.0520248	-0.0484489	-0.0537883	-0.0728898	-0.0559639	-0.0566679	-0.0616313	0.0314478	0.0672976	-0.0604097	-0.0426097	-0.0485704	0.0578226	-0.0459813	-0.0359974	-0.0445165	-0.0553391	-0.0428417	-0.0403282
Zfp277:ENSMUST00000069692.9	0.0860374	0.0871641	0.0853707	-0.088795	-0.063782	-0.0845612	0.089538	-0.0766309	0.0929844	-0.0645179	-0.0624895	-0.0770219	-0.0878358	-0.0851367	-0.0622493	-0.0692109	-0.0594853	-0.0756449	-0.0490053	-0.094564	-0.0795306	-0.0753556	-0.10624	0.0722527	0.0955061	-0.0664586	-0.0684673	-0.0952802	0.0725435	-0.0579513	-0.0573583	-0.0774303	-0.0518236	-0.0644183	-0.0626036
Mrrf:ENSMUST00000028250.8	0.121757	0.130685	0.129838	-0.106629	-0.0910373	-0.131997	0.116392	-0.117438	0.140819	-0.0890282	-0.112728	-0.0900155	-0.104834	-0.119393	-0.0951581	-0.0993866	-0.0956518	-0.124528	-0.095323	-0.137311	-0.0979074	-0.11007	-0.134607	0.0817359	0.136711	-0.10646	-0.0913034	-0.128776	0.113418	-0.0978486	-0.0985646	-0.094536	-0.0995801	-0.0936497	-0.107603
Pak1:ENSMUST00000033040.11	0.0599126	0.0705677	0.0543574	-0.0607546	-0.0345577	-0.0718161	0.0580086	-0.0588074	0.0579331	-0.0667429	-0.0512495	-0.0534577	-0.0615151	-0.0541214	-0.04867	-0.0488341	-0.0542347	-0.0636573	-0.0656373	-0.073104	-0.0621635	-0.0409398	-0.0628912	0.0309846	0.055808	-0.0592523	-0.0506797	-0.0670704	0.0337672	-0.0490096	-0.0430844	-0.0549106	-0.0486799	-0.040089	-0.0661017
Pnrc2:ENSMUST00000030436.11	0.0733937	0.0826895	0.0538844	-0.0552243	-0.0347889	-0.051639	0.0685837	-0.050507	0.0656248	-0.046511	-0.0672547	-0.0462594	-0.071471	-0.0416582	-0.0363535	-0.062831	-0.0330442	-0.0384203	-0.0203158	-0.0563891	-0.0581723	-0.0452858	-0.0550499	0.0587036	0.0653473	-0.0145168	-0.0299995	-0.0670678	0.0711763	-0.031021	-0.0359653	-0.0554615	-0.0398942	-0.034625	-0.0445819
Prepl:ENSMUST00000072406.4	0.0835345	0.0946815	0.0956313	-0.101329	-0.0713449	-0.0862692	0.0970282	-0.0591779	0.100546	-0.071889	-0.0839795	-0.0990634	-0.103606	-0.0947123	-0.0870718	-0.100273	-0.0738639	-0.0887058	-0.0743865	-0.0940578	-0.0840441	-0.0819764	-0.107773	0.0820041	0.0921989	-0.0845787	-0.064768	-0.0959062	0.0926063	-0.0709519	-0.0736638	-0.077612	-0.0794477	-0.0846604	-0.0860488
Tent2:ENSMUST00000225868.1	0.0718623	0.0672141	0.0788343	-0.0580139	-0.0650978	-0.0837552	0.0749847	-0.0725745	0.0858646	-0.0800584	-0.0433324	-0.0858057	-0.0967393	-0.0770589	-0.0649567	-0.0835758	-0.0605589	-0.0721459	-0.0517852	-0.0992477	-0.0797126	-0.0930306	-0.0896051	0.0837566	0.0876412	-0.0607703	-0.0475169	-0.0855612	0.0703408	-0.0331262	-0.0646611	-0.0643557	-0.0676458	-0.056242	-0.0532868
Ensa:ENSMUST00000058230.12	0.0308253	0.030596	0.0157794	-0.019842	-0.0162364	-0.0211926	0.0123183	-0.0178772	0.0311727	-0.0182932	-0.0183913	-0.0301163	-0.0242119	-0.0266337	-0.0268285	-0.0202337	-0.0237803	-0.0296097	-0.00882822	-0.0373848	-0.0281678	-0.0233221	-0.0226269	0.0194952	0.0342862	-0.0347578	-0.0168744	-0.0255779	0.0307045	-0.00373972	-0.0172738	-0.021387	-0.0263442	-0.0102798	-0.00789689
Fam32a:ENSMUST00000003123.9	0.0728182	0.069984	0.0618332	-0.0674084	-0.050032	-0.0804218	0.0591608	-0.076431	0.0691704	-0.05843	-0.0618436	-0.0649918	-0.063656	-0.0711914	-0.0552141	-0.0604229	-0.0472487	-0.0618526	-0.0472531	-0.0854868	-0.0611696	-0.0659553	-0.086414	0.0515325	0.071621	-0.0609104	-0.0569205	-0.082823	0.0549244	-0.0592171	-0.0549035	-0.0632566	-0.0622492	-0.0623767	-0.0666663
Prkar1a:ENSMUST00000106677.7	0.116333	0.146004	0.128027	-0.129304	-0.0982949	-0.15421	0.124655	-0.112863	0.160213	-0.11192	-0.135957	-0.101698	-0.102759	-0.123637	-0.0939586	-0.0894586	-0.116106	-0.129496	-0.108682	-0.140511	-0.108148	-0.111752	-0.150218	0.0923929	0.156058	-0.115849	-0.101098	-0.141326	0.111144	-0.118985	-0.107097	-0.108605	-0.105452	-0.0983188	-0.127395
Eloc:ENSMUST00000188641.6	0.124726	0.132997	0.111223	-0.127951	-0.077479	-0.125341	0.119154	-0.11617	0.135746	-0.0915386	-0.101334	-0.0923161	-0.121662	-0.114403	-0.0869622	-0.0891899	-0.090503	-0.118336	-0.101933	-0.147374	-0.0978224	-0.101761	-0.147986	0.103412	0.136479	-0.103115	-0.0808334	-0.117439	0.104003	-0.101546	-0.0974745	-0.101989	-0.107502	-0.0991059	-0.112933
Derl1:ENSMUST00000022993.6	0.0770021	0.101671	0.087064	-0.101583	-0.0763477	-0.113989	0.0928872	-0.101491	0.112936	-0.0937472	-0.100203	-0.0655491	-0.0780394	-0.088695	-0.0604945	-0.0662763	-0.0775487	-0.0900829	-0.0763639	-0.106379	-0.0907942	-0.0747694	-0.113475	0.0568429	0.105137	-0.0728402	-0.0710671	-0.103351	0.0745138	-0.0784643	-0.0611378	-0.0699501	-0.0744089	-0.086262	-0.0953683
E130114P18Rik:ENSMUST00000107067.7	0.0764383	0.0881812	0.0743563	-0.0939068	-0.0747963	-0.0992993	0.0469538	-0.0742719	0.101291	-0.0524436	-0.103688	-0.00870052	-0.0549394	-0.0651441	-0.0549551	-0.0170754	-0.0790579	-0.0727242	-0.0678187	-0.0875847	-0.0556369	-0.0403807	-0.0864048	0.0555441	0.111514	-0.06522	-0.0619422	-0.0684698	0.0709656	-0.0715499	-0.0727166	-0.0491355	-0.0393131	-0.0517059	-0.0751474
Smarce1:ENSMUST00000103133.3	0.0271539	0.0394849	0.0271312	-0.0316418	-0.0302658	-0.0380216	0.0308418	-0.0162955	0.0371877	-0.0233073	-0.0374225	-0.0202044	-0.0200889	-0.0334263	-0.0254127	-0.0224157	-0.0337099	-0.0294045	-0.0392435	-0.0374234	-0.0278264	-0.0304386	-0.0432371	0.0113153	0.0354823	-0.025993	-0.0253806	-0.0435074	0.0337033	-0.0183229	-0.01971	-0.0292346	-0.0260981	-0.0306373	-0.0323001
Nit2:ENSMUST00000023432.9	0.0406442	0.0507705	0.0541514	-0.038467	-0.0255274	-0.0553375	0.0155596	-0.0415604	0.0671737	-0.0497025	-0.0579521	-0.0203049	-0.0325613	-0.0248988	-0.00963058	-0.0372455	-0.0661275	-0.0334959	-0.0340005	-0.0681567	-0.0324163	-0.0321855	-0.0372066	0.0167666	0.0502429	-0.018728	-0.0354559	-0.045899	0.0446533	-0.0158336	-0.0163327	-0.0279334	-0.0209723	-0.0189617	-0.0364259
Gadd45gip1:ENSMUST00000036734.5	0.0418535	0.0676008	0.0459617	-0.0332221	-0.0301677	-0.0572331	0.0416933	-0.0583466	0.0600992	-0.0387333	-0.0565814	-0.0298439	-0.0537357	-0.0292951	-0.0114569	-0.0413313	-0.0435033	-0.0351221	-0.0331501	-0.0675412	-0.0455967	-0.0447839	-0.0425802	0.0322438	0.0451983	-0.0192793	-0.0340033	-0.0489929	0.0407196	-0.0132118	-0.0140614	-0.0299483	-0.0184923	-0.0298843	-0.0243256
Zfp106:ENSMUST00000055241.12	0.108032	0.10552	0.105122	-0.110867	-0.101017	-0.120039	0.106425	-0.0966012	0.124752	-0.0901959	-0.0910319	-0.0737799	-0.111673	-0.0950883	-0.0827668	-0.0841676	-0.0814789	-0.100206	-0.0869426	-0.115518	-0.120057	-0.100565	-0.133611	0.0932948	0.12951	-0.100039	-0.10055	-0.110582	0.0853635	-0.0618216	-0.08857	-0.0774326	-0.107577	-0.0659714	-0.0836095
Chtop:ENSMUST00000107343.7	0.115258	0.122345	0.110483	-0.105652	-0.0844198	-0.118835	0.123388	-0.0815092	0.121711	-0.0946898	-0.0943918	-0.0956563	-0.0916362	-0.107434	-0.0870792	-0.0806199	-0.0820388	-0.115072	-0.0826011	-0.116376	-0.0989261	-0.0901909	-0.134746	0.105107	0.132819	-0.101715	-0.0800713	-0.124701	0.111603	-0.0981902	-0.0920991	-0.0948398	-0.0952279	-0.0824943	-0.0958212
Reep5:ENSMUST00000006027.6	0.100847	0.120609	0.0895787	-0.111074	-0.0829745	-0.126464	0.119187	-0.094426	0.120245	-0.11158	-0.0947308	-0.118304	-0.121463	-0.116956	-0.0921326	-0.0915583	-0.0852515	-0.103373	-0.0941204	-0.114835	-0.0998603	-0.1009	-0.147151	0.0952694	0.124976	-0.105375	-0.0887804	-0.123846	0.102962	-0.111615	-0.0991852	-0.112215	-0.122382	-0.101112	-0.110607
Fam207a:ENSMUST00000045454.8	0.0938911	0.083123	0.0802111	-0.0870283	-0.0640527	-0.102253	0.0911157	-0.0617133	0.0947495	-0.0623548	-0.0709182	-0.0811315	-0.0749701	-0.0854824	-0.0669937	-0.0642821	-0.0732463	-0.0884191	-0.0775804	-0.0942983	-0.0623754	-0.0758635	-0.0936975	0.0693487	0.0980958	-0.0770456	-0.0644428	-0.0979862	0.085365	-0.0625897	-0.0592847	-0.0628136	-0.0690834	-0.071245	-0.0613815
Neo1:ENSMUST00000068664.6	0.124159	0.0785534	0.094478	-0.114168	-0.100963	-0.13498	0.108306	-0.0845702	0.134617	-0.109737	-0.0908441	-0.0907114	-0.10513	-0.0891036	-0.0701408	-0.103797	-0.090554	-0.106077	-0.088261	-0.134106	-0.100999	-0.10994	-0.137704	0.0882692	0.114352	-0.102175	-0.062659	-0.128389	0.0985317	-0.097546	-0.097452	-0.102138	-0.105416	-0.0816155	-0.124047
Baz1a:ENSMUST00000038926.12	0.252775	0.235369	0.195635	-0.235202	-0.181446	-0.253105	0.226941	-0.200636	0.26732	-0.201718	-0.180012	-0.22061	-0.24502	-0.230833	-0.164212	-0.206293	-0.174458	-0.234236	-0.173839	-0.248987	-0.213058	-0.212027	-0.278362	0.216713	0.25598	-0.22589	-0.183904	-0.241249	0.203986	-0.173745	-0.174574	-0.205032	-0.220315	-0.171632	-0.197347
Gnl1:ENSMUST00000087200.3	0.108754	0.113947	0.0967285	-0.104478	-0.0613635	-0.111476	0.107085	-0.0830791	0.111644	-0.0865942	-0.0908628	-0.093847	-0.0888396	-0.0956212	-0.0886315	-0.0817865	-0.0829925	-0.0887857	-0.0725958	-0.111482	-0.105466	-0.0905095	-0.119021	0.0905928	0.11796	-0.100117	-0.0634137	-0.10845	0.103451	-0.0885538	-0.0760559	-0.0914593	-0.0976351	-0.0763608	-0.096572
Katnbl1:ENSMUST00000028552.3	0.0898003	0.0775366	0.0616935	-0.076623	-0.0459657	-0.0758951	0.0834641	-0.0377061	0.0858778	-0.0711449	-0.0558704	-0.0773478	-0.0748588	-0.0718773	-0.0502345	-0.0637985	-0.0498052	-0.0744694	-0.0558052	-0.0732178	-0.0649566	-0.0752735	-0.0898036	0.0892431	0.0853282	-0.055532	-0.0558044	-0.076223	0.0783567	-0.0608667	-0.0605784	-0.0541703	-0.0599918	-0.0647107	-0.0492778
Azin1:ENSMUST00000065308.12	0.170738	0.141467	0.123075	-0.148007	-0.108269	-0.152624	0.146399	-0.112454	0.153796	-0.118016	-0.117532	-0.120617	-0.143164	-0.147813	-0.124166	-0.108964	-0.11048	-0.13101	-0.101405	-0.147927	-0.130571	-0.125613	-0.176509	0.140971	0.171004	-0.133875	-0.117189	-0.161698	0.132735	-0.12751	-0.117543	-0.122089	-0.125073	-0.118349	-0.132387
Hspa4:ENSMUST00000020630.7	0.166211	0.143434	0.143026	-0.177373	-0.131303	-0.180992	0.131132	-0.143715	0.173479	-0.129713	-0.139102	-0.145067	-0.183091	-0.166613	-0.132748	-0.126139	-0.13605	-0.166937	-0.148281	-0.189841	-0.1335	-0.138646	-0.198098	0.156743	0.17208	-0.153749	-0.129934	-0.181908	0.133865	-0.111098	-0.135723	-0.164547	-0.164469	-0.127101	-0.127089
Tial1:ENSMUST00000106226.8	0.129734	0.117191	0.107194	-0.130906	-0.0897978	-0.140436	0.120687	-0.111643	0.122997	-0.0979389	-0.0995937	-0.105389	-0.120863	-0.118141	-0.111489	-0.0978365	-0.0822011	-0.122708	-0.102588	-0.131371	-0.0982436	-0.107054	-0.150634	0.120116	0.140077	-0.110677	-0.0962755	-0.134208	0.114703	-0.0760306	-0.102798	-0.115302	-0.117713	-0.0933937	-0.0900462
Rad23b:ENSMUST00000030134.8	0.0996636	0.0860606	0.0819174	-0.0888954	-0.0526628	-0.0885071	0.0950089	-0.0611123	0.0892654	-0.0574485	-0.0776751	-0.0678983	-0.0850622	-0.0746789	-0.0623926	-0.0629578	-0.0658319	-0.0720447	-0.0559229	-0.0910451	-0.071078	-0.0722197	-0.0965536	0.089569	0.0982662	-0.0691493	-0.0677031	-0.0903982	0.0823779	-0.0683812	-0.0701783	-0.0757066	-0.0756446	-0.0601662	-0.0728221
Ubqln1:ENSMUST00000058735.11	0.130797	0.105187	0.104129	-0.12232	-0.0882657	-0.1113	0.116198	-0.0951954	0.110398	-0.0879398	-0.0835406	-0.10638	-0.11933	-0.10747	-0.101584	-0.0895343	-0.0796494	-0.101732	-0.0840446	-0.131553	-0.101056	-0.0957631	-0.13333	0.101011	0.116852	-0.10335	-0.0876777	-0.129312	0.103439	-0.0722291	-0.101231	-0.103796	-0.108096	-0.0835765	-0.0831185
Arxes1:ENSMUST00000057625.2	0.104524	0.087998	0.073954	-0.104086	-0.0739938	-0.102321	0.0850773	-0.0910633	0.0974783	-0.0766326	-0.0836732	-0.0806612	-0.100842	-0.0897124	-0.0790761	-0.0765173	-0.0749555	-0.0859802	-0.0763372	-0.0999094	-0.0888702	-0.0872441	-0.121523	0.0699511	0.091773	-0.0833475	-0.0876011	-0.0928867	0.0781688	-0.0810702	-0.0714508	-0.086261	-0.0950927	-0.0675624	-0.0928755
Hnrnpdl:ENSMUST00000128187.7	0.123556	0.111058	0.0964133	-0.115451	-0.0844146	-0.120917	0.102329	-0.107678	0.106891	-0.0947052	-0.114932	-0.0933409	-0.101743	-0.116107	-0.0983397	-0.0906126	-0.0825848	-0.113514	-0.0944999	-0.123325	-0.101589	-0.0991386	-0.149117	0.0886535	0.119636	-0.112968	-0.0904297	-0.118188	0.0963963	-0.0873456	-0.106883	-0.104808	-0.110208	-0.0936433	-0.0983245
Hsbp1:ENSMUST00000034300.7	0.122154	0.114036	0.1057	-0.0995558	-0.0682557	-0.117756	0.129887	-0.0913316	0.109311	-0.0862748	-0.0850718	-0.0906752	-0.114661	-0.101052	-0.0805666	-0.086683	-0.0720965	-0.0985639	-0.0762389	-0.12351	-0.104158	-0.0964582	-0.129795	0.104608	0.123538	-0.0877278	-0.0793808	-0.110106	0.0963905	-0.0838237	-0.0825046	-0.0880972	-0.0900086	-0.0833122	-0.0921566
Tra2b:ENSMUST00000161286.7	0.0787353	0.0785319	0.071545	-0.0728051	-0.0492508	-0.0722456	0.0809313	-0.0549225	0.0804368	-0.0705236	-0.0610372	-0.067611	-0.0682382	-0.0685078	-0.0592252	-0.05374	-0.0548101	-0.0726759	-0.0561422	-0.0797038	-0.0619253	-0.052902	-0.0883928	0.0709083	0.0849717	-0.0602323	-0.0529673	-0.0762531	0.0697176	-0.0592512	-0.0487399	-0.0535015	-0.0616688	-0.0540387	-0.0585531
Marchf6:ENSMUST00000090227.5	0.0951861	0.0750323	0.0560405	-0.0926945	-0.0582897	-0.0743745	0.0858162	-0.0717974	0.0905592	-0.0619925	-0.0666912	-0.0560383	-0.0696817	-0.0790498	-0.0695442	-0.0553424	-0.0540876	-0.0775029	-0.0601021	-0.0860814	-0.0581794	-0.0751562	-0.0800512	0.0722331	0.0828163	-0.0783628	-0.0758925	-0.0777685	0.0627208	-0.0804264	-0.0617856	-0.0721941	-0.050865	-0.0578795	-0.0802391
Usp47:ENSMUST00000210309.1	0.100577	0.103385	0.0870364	-0.0940072	-0.0707133	-0.0973186	0.103788	-0.0744291	0.117207	-0.0768052	-0.076699	-0.0661085	-0.0959269	-0.0813413	-0.0795405	-0.0651267	-0.0517995	-0.0822372	-0.0673961	-0.0965272	-0.0919234	-0.0935788	-0.101628	0.0941893	0.128206	-0.0892591	-0.0689843	-0.0832139	0.11209	-0.0961516	-0.0896263	-0.0902924	-0.0836701	-0.0744829	-0.113868
Ube4b:ENSMUST00000103212.9	0.113092	0.0838078	0.0894464	-0.0798243	-0.0542755	-0.0786468	0.0959923	-0.0546229	0.105211	-0.0567118	-0.0653697	-0.0636203	-0.0855062	-0.0787124	-0.0613363	-0.068681	-0.057258	-0.0788344	-0.0502211	-0.0802012	-0.0729566	-0.0654933	-0.0872882	0.0810558	0.0976156	-0.0609778	-0.0519024	-0.0826158	0.0915151	-0.0830092	-0.0647669	-0.0695612	-0.0688406	-0.0731341	-0.0679135
Pcgf2:ENSMUST00000179765.7	0.0660194	0.0622463	0.0507711	-0.0617592	-0.0548789	-0.0762738	0.050935	-0.0510008	0.0829991	-0.0491323	-0.0722618	-0.0410493	-0.0695333	-0.0560223	-0.0509489	-0.0381893	-0.0545163	-0.0539425	-0.0553199	-0.0826473	-0.0550703	-0.0546397	-0.0750153	0.0511047	0.0881825	-0.0622542	-0.0587707	-0.0574491	0.0530326	-0.030434	-0.0577097	-0.0509153	-0.0557971	-0.0507159	-0.0670617
Polr3k:ENSMUST00000039551.8	0.0805979	0.0781947	0.0746269	-0.0728333	-0.0516771	-0.0853536	0.0749866	-0.0617172	0.0780112	-0.0643304	-0.0653037	-0.0594487	-0.0723866	-0.0716178	-0.0647739	-0.054329	-0.0585211	-0.0761143	-0.0616211	-0.0818839	-0.0680071	-0.0672848	-0.0978819	0.0604169	0.087907	-0.0685502	-0.0544607	-0.0770006	0.0695405	-0.0624236	-0.0572044	-0.0676464	-0.0682771	-0.0498553	-0.0561543
Egln1:ENSMUST00000034469.6	0.144931	0.0962509	0.116055	-0.146212	-0.105007	-0.137095	0.119111	-0.102715	0.14621	-0.0805132	-0.120937	-0.103394	-0.100329	-0.127129	-0.0975811	-0.103279	-0.0939693	-0.113047	-0.114276	-0.113521	-0.121227	-0.104542	-0.146701	0.109014	0.131323	-0.118054	-0.088689	-0.114278	0.0994451	-0.0973437	-0.110013	-0.108351	-0.117882	-0.0776225	-0.103682
Ube2d2a:ENSMUST00000170693.8	0.103739	0.0937885	0.0855218	-0.0932514	-0.0615036	-0.101395	0.0939948	-0.067617	0.108741	-0.0767581	-0.0853934	-0.0747719	-0.076354	-0.0886672	-0.0719674	-0.0734223	-0.0677842	-0.0895776	-0.0713378	-0.094542	-0.0793681	-0.0791218	-0.110293	0.0837836	0.110255	-0.0894101	-0.0727173	-0.0930284	0.0868768	-0.0832791	-0.0687238	-0.0686457	-0.0742201	-0.0750913	-0.0840805
Arpp19:ENSMUST00000169492.7	0.179959	0.148476	0.146394	-0.1566	-0.115476	-0.174059	0.165876	-0.136724	0.17765	-0.126783	-0.121895	-0.13043	-0.148828	-0.160126	-0.123023	-0.125177	-0.109509	-0.155077	-0.124384	-0.175525	-0.135665	-0.12968	-0.201923	0.143688	0.18245	-0.136001	-0.126293	-0.166685	0.114642	-0.134285	-0.128467	-0.144275	-0.138764	-0.119524	-0.131123
Utp23:ENSMUST00000059599.9	0.0642104	0.0673991	0.0651006	-0.054471	-0.0472627	-0.0801296	0.0695856	-0.0382274	0.0640393	-0.0534583	-0.0556168	-0.0727437	-0.0853198	-0.0689906	-0.0588212	-0.0481364	-0.0561297	-0.0617058	-0.054896	-0.0679846	-0.0512467	-0.0594346	-0.0899401	0.0617849	0.0639652	-0.0596667	-0.0445926	-0.0724388	0.0758476	-0.0440426	-0.0487988	-0.0688218	-0.0652792	-0.0606588	-0.0324743
Hnrnpa0:ENSMUST00000007980.6	0.080444	0.0564603	0.0551472	-0.0752884	-0.0502355	-0.0654336	0.0677143	-0.0577636	0.0734748	-0.047679	-0.0554086	-0.0560068	-0.0467126	-0.0707799	-0.0538713	-0.0563075	-0.052296	-0.071667	-0.0632789	-0.0660079	-0.0448825	-0.0689091	-0.0733746	0.0503405	0.0667485	-0.0817761	-0.0576764	-0.0716351	0.0585933	-0.0483392	-0.06529	-0.0585449	-0.0629664	-0.0450566	-0.0542547
Micu2:ENSMUST00000022543.9	0.0904279	0.0571794	0.0778421	-0.0520799	-0.0716359	-0.0786982	0.0797463	-0.0494716	0.0730698	-0.0593937	-0.0456219	-0.0735654	-0.0594117	-0.0754903	-0.075344	-0.0722267	-0.0444304	-0.0784841	-0.0657111	-0.0798968	-0.0431437	-0.0676465	-0.0907327	0.0689534	0.105123	-0.0679886	-0.0676243	-0.0766214	0.0539737	-0.07579	-0.0777637	-0.0678934	-0.0668471	-0.074183	-0.0536015
Stt3b:ENSMUST00000035010.9	0.111068	0.0810921	0.076266	-0.0979652	-0.0749885	-0.115874	0.0921917	-0.0928806	0.0988468	-0.0750725	-0.089511	-0.0848186	-0.093181	-0.103087	-0.0789164	-0.0905108	-0.0718195	-0.089942	-0.0787091	-0.110837	-0.087799	-0.0781874	-0.121206	0.0795824	0.115043	-0.0807563	-0.0807849	-0.104782	0.0862189	-0.0929094	-0.0964046	-0.089678	-0.0942527	-0.0732353	-0.0890708
H2bc4:ENSMUST00000018246.5	0.194928	0.176186	0.148665	-0.202627	-0.15017	-0.225627	0.216612	-0.11506	0.249542	-0.14616	-0.178033	-0.242666	-0.133739	-0.214923	-0.161019	-0.13483	-0.168079	-0.303125	-0.175036	-0.186243	-0.163503	-0.196366	-0.271454	0.202357	0.259937	-0.294561	-0.142091	-0.218245	0.196591	-0.208198	-0.171388	-0.202263	-0.185351	-0.147629	-0.186654
Kifap3:ENSMUST00000077642.11	0.0955886	0.071216	0.0513798	-0.0694689	-0.0497059	-0.0696458	0.0844094	-0.0633839	0.0864376	-0.0470936	-0.0527786	-0.0686951	-0.0626289	-0.0716192	-0.0582041	-0.0653897	-0.0347448	-0.0576762	-0.0379441	-0.0770083	-0.0794202	-0.0713029	-0.0799692	0.0725404	0.0787629	-0.0778034	-0.0609077	-0.074508	0.0642436	-0.0850071	-0.0726935	-0.0675156	-0.0758519	-0.0734624	-0.0725332
Mmd:ENSMUST00000004050.6	0.114274	0.109285	0.107983	-0.108804	-0.0964163	-0.130277	0.124472	-0.0920357	0.121337	-0.0925694	-0.0953885	-0.103662	-0.118193	-0.112079	-0.0854222	-0.0952103	-0.0826471	-0.110934	-0.089881	-0.119817	-0.0888245	-0.0970573	-0.14395	0.0860644	0.115637	-0.0983042	-0.0949746	-0.118147	0.105432	-0.0960249	-0.0961125	-0.107552	-0.0995046	-0.0956053	-0.108498
Rexo2:ENSMUST00000217037.1	0.184879	0.170012	0.181074	-0.172085	-0.150607	-0.203914	0.191184	-0.173593	0.185383	-0.13759	-0.145147	-0.171503	-0.164448	-0.184968	-0.168295	-0.127601	-0.135073	-0.173834	-0.158426	-0.210397	-0.139304	-0.15043	-0.215109	0.14546	0.196102	-0.168096	-0.133664	-0.181551	0.176843	-0.144079	-0.135963	-0.156307	-0.183799	-0.139346	-0.144434
Dnajb1:ENSMUST00000005620.9	0.0672801	0.0744724	0.0720747	-0.0660527	-0.0580767	-0.0624299	0.0618662	-0.0475513	0.076905	-0.0636777	-0.0455934	-0.0447504	-0.0507583	-0.0545949	-0.049646	-0.0466105	-0.0410151	-0.0470906	-0.0391532	-0.0589371	-0.0561218	-0.0510544	-0.0684293	0.0557575	0.0780962	-0.0512159	-0.0513581	-0.0539949	0.0556782	-0.049937	-0.0298877	-0.0334967	-0.0328118	-0.0480966	-0.0648116
Tmem9b:ENSMUST00000033333.12	0.0788077	0.0690138	0.0644653	-0.0812743	-0.0464448	-0.0824274	0.0720858	-0.0715731	0.078853	-0.0530013	-0.0702387	-0.0588718	-0.0613984	-0.0743726	-0.0505915	-0.0655602	-0.0425233	-0.0594452	-0.0613182	-0.0847323	-0.0704629	-0.0621718	-0.0899233	0.05566	0.0814587	-0.0445475	-0.0570993	-0.0741533	0.04616	-0.0534805	-0.0500068	-0.0508223	-0.0646183	-0.0415364	-0.0790453
Parp1:ENSMUST00000027777.11	0.129045	0.117786	0.118822	-0.126275	-0.105175	-0.139611	0.104167	-0.101095	0.143775	-0.0987252	-0.12886	-0.087137	-0.114236	-0.127959	-0.0950978	-0.0818635	-0.092815	-0.108555	-0.111542	-0.135711	-0.0899693	-0.0975104	-0.148249	0.101287	0.144067	-0.119219	-0.0867195	-0.129094	0.119492	-0.0798877	-0.106321	-0.0916091	-0.105916	-0.0852873	-0.104154
Bub3:ENSMUST00000207442.1	0.10604	0.104098	0.100873	-0.098521	-0.0658784	-0.10842	0.108522	-0.0650966	0.118701	-0.0854409	-0.0740826	-0.0952068	-0.102233	-0.103325	-0.0803822	-0.0697911	-0.0700272	-0.0931771	-0.0757598	-0.101716	-0.0922112	-0.084683	-0.12857	0.09656	0.120124	-0.0889706	-0.0614783	-0.107792	0.0978241	-0.0967142	-0.0912364	-0.0905517	-0.0924804	-0.0817444	-0.0980226
Ppp1r2:ENSMUST00000060188.13	0.127495	0.126812	0.120438	-0.11759	-0.0907559	-0.138058	0.127501	-0.0906761	0.135419	-0.100236	-0.0950078	-0.0961994	-0.118928	-0.118903	-0.0970088	-0.083505	-0.0844949	-0.110592	-0.0908543	-0.123639	-0.104229	-0.0987012	-0.141346	0.110107	0.131519	-0.110893	-0.0873828	-0.121712	0.121123	-0.0922328	-0.101393	-0.0918425	-0.11356	-0.094394	-0.0946802
Btbd1:ENSMUST00000026093.8	0.12099	0.103329	0.0972872	-0.0952442	-0.0721377	-0.118384	0.11023	-0.0917639	0.114861	-0.084571	-0.089189	-0.0916155	-0.112489	-0.0935082	-0.0787461	-0.0903588	-0.0812579	-0.0958306	-0.0819261	-0.12703	-0.103213	-0.0973239	-0.123453	0.104504	0.11508	-0.0916298	-0.0759341	-0.104967	0.0937083	-0.0739305	-0.0836519	-0.0931973	-0.0907799	-0.090701	-0.0989816
Sms:ENSMUST00000112529.7	0.0873941	0.0642909	0.0729722	-0.0769383	-0.0513135	-0.0888707	0.0727422	-0.0666362	0.0986324	-0.0758078	-0.0751002	-0.0738928	-0.089991	-0.083122	-0.0739243	-0.0584119	-0.0685734	-0.0752257	-0.0616703	-0.0985203	-0.0779816	-0.0683377	-0.0993869	0.0786044	0.085705	-0.0748204	-0.069423	-0.0865237	0.0861755	-0.0636517	-0.0704935	-0.0708345	-0.0804	-0.0580296	-0.0704001
Nolc1:ENSMUST00000223728.1	0.199437	0.159049	0.179808	-0.198763	-0.134101	-0.201828	0.181041	-0.174461	0.21763	-0.151257	-0.159918	-0.150059	-0.173153	-0.194534	-0.167824	-0.137174	-0.12876	-0.186198	-0.159637	-0.209934	-0.149735	-0.167383	-0.219037	0.170979	0.199128	-0.175346	-0.134007	-0.175456	0.164551	-0.121954	-0.150707	-0.152834	-0.167424	-0.137324	-0.140045
Ess2:ENSMUST00000232423.1	0.122961	0.103205	0.1004	-0.0901052	-0.0730121	-0.105651	0.102477	-0.0769865	0.116843	-0.0892009	-0.0690494	-0.0965215	-0.0899324	-0.0800986	-0.0823943	-0.0758914	-0.073349	-0.0849702	-0.0766284	-0.10626	-0.0929032	-0.0837271	-0.115999	0.104101	0.105563	-0.0986285	-0.0726677	-0.101329	0.0784085	-0.09161	-0.0866261	-0.086466	-0.0814397	-0.0870476	-0.0923435
Erp44:ENSMUST00000030028.4	0.157249	0.14514	0.122674	-0.142141	-0.0938228	-0.152378	0.137744	-0.109926	0.157497	-0.126055	-0.118346	-0.126248	-0.135896	-0.129856	-0.105189	-0.105467	-0.100571	-0.121728	-0.111255	-0.157718	-0.123807	-0.111326	-0.164063	0.137126	0.149023	-0.129577	-0.10087	-0.158194	0.127424	-0.111164	-0.130684	-0.118081	-0.134242	-0.102906	-0.110827
Tmem33:ENSMUST00000037918.11	0.11497	0.116891	0.0975162	-0.118157	-0.0825304	-0.119969	0.105665	-0.0847285	0.127563	-0.0945438	-0.106924	-0.0893759	-0.102181	-0.0981532	-0.0753917	-0.0789536	-0.0815665	-0.101199	-0.0855718	-0.122787	-0.110779	-0.0813862	-0.136176	0.112774	0.131338	-0.0851796	-0.0865736	-0.115851	0.0998859	-0.0792108	-0.0813472	-0.0884011	-0.0912163	-0.0751679	-0.104194
Anp32e:ENSMUST00000165307.7	0.18206	0.170601	0.16054	-0.167783	-0.115844	-0.178763	0.176109	-0.141853	0.186056	-0.130443	-0.144114	-0.118394	-0.173891	-0.154147	-0.127867	-0.110142	-0.118059	-0.13539	-0.118314	-0.177343	-0.140178	-0.128807	-0.200072	0.170624	0.195118	-0.128613	-0.126923	-0.160102	0.147673	-0.127832	-0.13533	-0.128786	-0.134246	-0.118702	-0.139063
Cilk1:ENSMUST00000044551.7	0.178264	0.154681	0.152769	-0.158665	-0.124277	-0.184412	0.170418	-0.13043	0.204509	-0.126739	-0.150476	-0.125789	-0.163651	-0.165894	-0.137196	-0.141563	-0.119926	-0.172569	-0.118638	-0.168432	-0.138236	-0.146917	-0.193061	0.157106	0.18594	-0.15455	-0.126468	-0.160243	0.160575	-0.124204	-0.141986	-0.117232	-0.14315	-0.136396	-0.146583
Pspc1:ENSMUST00000022507.12	0.116224	0.0994204	0.0945415	-0.103676	-0.0844054	-0.114168	0.090797	-0.0880437	0.117651	-0.0780869	-0.0982035	-0.0913792	-0.0960955	-0.0999765	-0.0824418	-0.0990748	-0.0741751	-0.0916158	-0.0870579	-0.114536	-0.0887071	-0.0872464	-0.121574	0.102708	0.118948	-0.0804796	-0.0775464	-0.0981033	0.0978303	-0.0837891	-0.0840375	-0.0925362	-0.0974405	-0.0774321	-0.083136
Mtfr1l:ENSMUST00000102550.9	0.0810239	0.0765665	0.0816553	-0.0823636	-0.063553	-0.0828307	0.0799054	-0.0680017	0.0883583	-0.0522496	-0.0738241	-0.0472272	-0.0770297	-0.0706515	-0.0551865	-0.0647818	-0.0600369	-0.0848167	-0.0696719	-0.0853218	-0.0575736	-0.0657084	-0.0876513	0.0528409	0.0909721	-0.0748628	-0.0624514	-0.0821247	0.0610036	-0.0598038	-0.0689357	-0.0638251	-0.0605986	-0.0618241	-0.070314
Gpatch11:ENSMUST00000170759.2	0.123739	0.132529	0.112075	-0.141676	-0.0841323	-0.150378	0.129307	-0.118251	0.154759	-0.0765366	-0.118508	-0.0928547	-0.107108	-0.123231	-0.0981489	-0.0943934	-0.0825888	-0.119891	-0.0945035	-0.138631	-0.103203	-0.111066	-0.14255	0.101434	0.138846	-0.102832	-0.0886248	-0.142428	0.113771	-0.100082	-0.0868983	-0.116407	-0.108604	-0.0976353	-0.125292
Atg4b:ENSMUST00000027502.15	0.133976	0.11025	0.0933083	-0.121107	-0.0843453	-0.138432	0.119591	-0.0967152	0.138546	-0.100232	-0.112437	-0.0819754	-0.0962049	-0.109716	-0.0892849	-0.0896255	-0.0906466	-0.117911	-0.101846	-0.138266	-0.104107	-0.108069	-0.134453	0.096641	0.123814	-0.112337	-0.0764697	-0.119125	0.109075	-0.0759377	-0.0998196	-0.0839002	-0.0949445	-0.0829581	-0.0964746
Ing2:ENSMUST00000080353.2	0.087509	0.0875397	0.0869739	-0.100791	-0.0637921	-0.109415	0.0942633	-0.0939385	0.123114	-0.0790809	-0.0838853	-0.0707584	-0.0894179	-0.0975828	-0.0805004	-0.0829623	-0.0873147	-0.0847604	-0.0740061	-0.11189	-0.0791319	-0.0949646	-0.106471	0.0729125	0.115227	-0.0903119	-0.0538062	-0.0951622	0.0963322	-0.05549	-0.0710446	-0.0763221	-0.078337	-0.0628157	-0.0820572
Nedd4l:ENSMUST00000163516.8	0.12784	0.117262	0.112205	-0.110579	-0.0418603	-0.11682	0.118311	-0.0971119	0.126096	-0.0798473	-0.0763472	-0.117005	-0.120562	-0.0990289	-0.093202	-0.0911147	-0.0721066	-0.0845583	-0.0605683	-0.11916	-0.0970069	-0.108327	-0.104944	0.0933695	0.120482	-0.0720155	-0.0786354	-0.100686	0.107083	-0.0991353	-0.0784566	-0.0954292	-0.0994674	-0.0764846	-0.10112
Gdap1l1:ENSMUST00000109420.9	0.0425816	0.0547599	0.050316	-0.0502949	-0.034018	-0.0506025	0.055102	-0.0145388	0.0455266	-0.0285595	-0.0294245	-0.0493433	-0.039122	-0.0420781	-0.0314607	-0.0347537	-0.0225325	-0.0524571	-0.0175001	-0.0482125	-0.0384234	-0.0426784	-0.0295459	0.0355602	0.0425454	-0.0423596	-0.0320771	-0.0369179	0.0557301	-0.0456348	-0.0227957	-0.0347052	-0.0320072	-0.0269471	-0.0489787
Aasdhppt:ENSMUST00000051589.8	0.106071	0.0945087	0.0970351	-0.122857	-0.0899628	-0.126747	0.0959677	-0.100374	0.130867	-0.0718031	-0.0973768	-0.0846436	-0.0957083	-0.109344	-0.0887183	-0.098486	-0.0817872	-0.0985409	-0.0973043	-0.121658	-0.0946469	-0.0875989	-0.13254	0.0892625	0.128818	-0.0902378	-0.0929731	-0.114465	0.096752	-0.0761509	-0.10506	-0.0889678	-0.0929202	-0.0736629	-0.0877952
Rab3c:ENSMUST00000167824.2	0.0381375	0.0674562	0.0332407	-0.0616158	-0.0368023	-0.0407469	0.0515433	-0.0401873	0.0442801	-0.0486176	-0.0345515	-0.0648664	-0.0559296	-0.0501322	-0.0380655	-0.0407927	-0.0406484	-0.0218915	-0.0463875	-0.0574459	-0.0453542	-0.0313508	-0.0670126	0.031395	0.0550489	-0.0467338	-0.0359767	-0.0534581	0.0437553	-0.0616427	-0.0565439	-0.0729666	-0.0650183	-0.0388187	-0.0531776
Dnaja1:ENSMUST00000164233.7	0.16996	0.155865	0.149567	-0.157831	-0.122456	-0.17537	0.150381	-0.144529	0.170443	-0.128226	-0.138505	-0.137449	-0.157057	-0.152491	-0.118148	-0.137616	-0.11475	-0.146956	-0.12022	-0.176087	-0.139158	-0.14034	-0.187905	0.125946	0.175519	-0.141965	-0.118004	-0.161517	0.131903	-0.127665	-0.126802	-0.133419	-0.137804	-0.131702	-0.152376
Pno1:ENSMUST00000020317.7	0.105019	0.105543	0.0840378	-0.102307	-0.099615	-0.112755	0.0860247	-0.0946938	0.126145	-0.0759277	-0.106469	-0.076689	-0.0829148	-0.0987351	-0.0662725	-0.0695232	-0.0801587	-0.0960636	-0.0811699	-0.116592	-0.0793602	-0.0764184	-0.11443	0.0893939	0.12134	-0.0867912	-0.0853409	-0.101258	0.100823	-0.0622923	-0.0913988	-0.078368	-0.0917965	-0.0727356	-0.0701634
Serpini1:ENSMUST00000029423.8	0.130901	0.135877	0.0784699	-0.0777247	-0.0304815	-0.0896971	0.13975	-0.0487762	0.0665452	-0.0929182	-0.0678675	-0.13057	-0.131563	-0.0866371	-0.0824398	-0.097677	-0.0226167	-0.0650468	-0.0495884	-0.107192	-0.0945379	-0.0798844	-0.0970259	0.115054	0.113141	-0.0481221	-0.0448058	-0.107798	0.0982402	-0.0898261	-0.0831627	-0.0901367	-0.08749	-0.0764582	-0.0930848
Scrn1:ENSMUST00000019268.10	0.0894044	0.101572	0.0754635	-0.101505	-0.0669578	-0.0953641	0.0830991	-0.0705031	0.093898	-0.0771296	-0.0797435	-0.0799693	-0.0935034	-0.0900396	-0.0625359	-0.0558364	-0.06713	-0.0785938	-0.0620077	-0.104039	-0.0829454	-0.0771636	-0.0951049	0.0635789	0.0951113	-0.0747201	-0.0555234	-0.0904966	0.0710303	-0.0742362	-0.0692121	-0.0715387	-0.0707057	-0.0647814	-0.0652033
Wbp4:ENSMUST00000022601.6	0.120928	0.0958555	0.102743	-0.101874	-0.0844057	-0.120435	0.100556	-0.0939786	0.121706	-0.0898504	-0.0931785	-0.0880324	-0.0957953	-0.10014	-0.0701962	-0.107299	-0.0819905	-0.0876292	-0.0988499	-0.121456	-0.099868	-0.0814144	-0.120501	0.0859862	0.106026	-0.0871348	-0.0837132	-0.108372	0.0831776	-0.0739096	-0.0778963	-0.0814743	-0.0697242	-0.0813029	-0.0994129
Rab10:ENSMUST00000021001.9	0.125162	0.10375	0.114467	-0.119815	-0.0919731	-0.139003	0.115793	-0.111824	0.130756	-0.0948342	-0.107862	-0.0949182	-0.113428	-0.116766	-0.0904284	-0.107614	-0.0894193	-0.117347	-0.102909	-0.130411	-0.0906212	-0.114005	-0.135256	0.0944918	0.131371	-0.0989634	-0.0869855	-0.117713	0.100685	-0.0932319	-0.0996465	-0.102708	-0.100605	-0.0963974	-0.108451
Mapre1:ENSMUST00000028981.8	0.0821528	0.0617427	0.0710964	-0.0737645	-0.0585123	-0.0758413	0.0644266	-0.0676527	0.0773215	-0.0567332	-0.0644959	-0.0545895	-0.0566944	-0.0650168	-0.0560857	-0.0513125	-0.0537294	-0.0646767	-0.0555794	-0.0761718	-0.0661795	-0.0603773	-0.0828046	0.0530164	0.0839644	-0.0578911	-0.063314	-0.067133	0.0568952	-0.0583333	-0.0615883	-0.0621487	-0.057127	-0.0508578	-0.0707653
Itfg1:ENSMUST00000034140.8	0.178786	0.147852	0.135664	-0.168975	-0.124462	-0.174959	0.159887	-0.141408	0.181552	-0.126319	-0.12804	-0.150473	-0.160476	-0.161901	-0.136878	-0.134839	-0.116221	-0.159275	-0.129009	-0.186281	-0.132747	-0.13753	-0.198311	0.14494	0.168274	-0.148483	-0.108771	-0.171241	0.127315	-0.141704	-0.137096	-0.143527	-0.15739	-0.132359	-0.149721
Ccdc34:ENSMUST00000028580.11	0.130524	0.109031	0.104135	-0.107799	-0.0852594	-0.115537	0.0978356	-0.0901521	0.129225	-0.0832917	-0.0933705	-0.0662957	-0.0897037	-0.120116	-0.070322	-0.0781228	-0.0958867	-0.106709	-0.095663	-0.122639	-0.0618671	-0.0854476	-0.128973	0.107705	0.120653	-0.0866214	-0.0758279	-0.114971	0.0893362	-0.0738836	-0.088028	-0.0696539	-0.0962512	-0.0865472	-0.0903793
Sh3glb1:ENSMUST00000198254.4	0.169167	0.153512	0.131094	-0.153748	-0.117185	-0.170186	0.148323	-0.132802	0.175393	-0.116207	-0.128345	-0.134045	-0.148723	-0.158247	-0.126332	-0.126635	-0.110469	-0.14677	-0.134692	-0.177386	-0.135556	-0.143788	-0.192654	0.138799	0.170999	-0.135049	-0.11563	-0.155826	0.12806	-0.111935	-0.136734	-0.13701	-0.140633	-0.127907	-0.137167
Pyroxd1:ENSMUST00000041852.7	0.0545214	0.0498239	0.0390241	-0.0458739	-0.0611874	-0.075016	0.0360985	-0.041231	0.0680879	-0.0590941	-0.0345893	-0.0201316	-0.0594766	-0.0568938	-0.0386828	-0.0425502	-0.071382	-0.0622794	-0.107578	-0.0686896	-0.0357834	-0.0341772	-0.0554078	0.0144271	0.0369572	-0.0411098	-0.0324759	-0.0399761	0.0613965	-0.0119959	-0.0318546	-0.0408928	-0.0481826	-0.0475683	-0.0455363
Cs:ENSMUST00000005826.8	0.0794383	0.0663272	0.0632549	-0.071875	-0.0518127	-0.0831431	0.0749386	-0.0734697	0.0829732	-0.0583032	-0.0734732	-0.0549534	-0.0756895	-0.0741071	-0.0670894	-0.0606487	-0.0540424	-0.0665932	-0.0596061	-0.0907598	-0.0677175	-0.0714415	-0.090437	0.066136	0.086611	-0.0687389	-0.0641986	-0.0779988	0.0684276	-0.0549421	-0.064936	-0.0661846	-0.065009	-0.0620456	-0.056697
Rnf121:ENSMUST00000096639.11	0.130827	0.119446	0.0957603	-0.116292	-0.0902694	-0.134876	0.11142	-0.112263	0.114245	-0.0943019	-0.10139	-0.103603	-0.107163	-0.119891	-0.099602	-0.106459	-0.0859224	-0.108852	-0.100581	-0.129982	-0.098087	-0.108937	-0.14069	0.0821484	0.119643	-0.106799	-0.100372	-0.118267	0.113177	-0.0821014	-0.101624	-0.110497	-0.106159	-0.092631	-0.0982532
Rnf165:ENSMUST00000026494.13	0.0654069	0.0686231	0.0627509	-0.0499019	-0.0315504	-0.0634249	0.0663726	-0.0417367	0.0641444	-0.043157	-0.0597099	-0.0464595	-0.0495851	-0.0574476	-0.0411716	-0.042296	-0.0359628	-0.0494325	-0.0399695	-0.0628145	-0.0542941	-0.0468225	-0.0545128	0.054961	0.0717686	-0.0627945	-0.0387778	-0.0580766	0.048965	-0.0493113	-0.0374584	-0.0451462	-0.0284425	-0.0346079	-0.0490578
Saal1:ENSMUST00000143082.3	0.0709294	0.0694287	0.0608449	-0.0772451	-0.0443149	-0.0787718	0.0630991	-0.0689612	0.06374	-0.0449574	-0.0618799	-0.0545058	-0.0713125	-0.0831252	-0.0803697	-0.0440743	-0.0480056	-0.0757061	-0.0677551	-0.0778231	-0.0573221	-0.0510489	-0.0894828	0.0544008	0.0727892	-0.0613911	-0.0612714	-0.0661251	0.0605663	-0.04605	-0.0562675	-0.0614138	-0.0794305	-0.0585195	-0.0583128
Acat1:ENSMUST00000034547.5	0.0546817	0.0782922	0.0507184	-0.0633473	-0.040533	-0.0588435	0.062217	-0.0381082	0.0654004	-0.057173	-0.0452519	-0.0592228	-0.0629939	-0.0578715	-0.0369798	-0.047074	-0.0462388	-0.0494747	-0.0302476	-0.055421	-0.0596356	-0.049857	-0.0699902	0.0388561	0.0681589	-0.0425476	-0.0346407	-0.0573276	0.0658193	-0.0564608	-0.0396829	-0.0454949	-0.0479734	-0.0578801	-0.055003
Sar1a:ENSMUST00000020285.9	0.108408	0.0897544	0.0787747	-0.0980438	-0.0658659	-0.103086	0.0953124	-0.0920515	0.0936515	-0.0742844	-0.0689846	-0.090064	-0.0890977	-0.0811125	-0.0830148	-0.0833982	-0.0598481	-0.0859842	-0.0752314	-0.111375	-0.0832056	-0.0875874	-0.11917	0.0805381	0.0980894	-0.0860233	-0.0790262	-0.107206	0.0681264	-0.0647647	-0.0831451	-0.0813103	-0.0871869	-0.0713877	-0.0752898
Cops8:ENSMUST00000036153.11	0.0815571	0.0623178	0.0627602	-0.0665841	-0.051895	-0.0703655	0.0767648	-0.0514425	0.0667869	-0.0539219	-0.0620194	-0.055375	-0.0653192	-0.0554401	-0.0456792	-0.057958	-0.0410439	-0.0609304	-0.0471015	-0.0738423	-0.0568367	-0.0561353	-0.0863317	0.0565414	0.0665488	-0.0511721	-0.04745	-0.0627809	0.0758505	-0.0532277	-0.0522909	-0.0571627	-0.057218	-0.0451217	-0.0559868
Cadm3:ENSMUST00000111220.7	0.10108	0.0608259	0.0458736	-0.0467859	-0.0520773	-0.0772855	0.0823629	-0.0193078	0.0643314	-0.0502635	-0.0372234	-0.0462416	-0.0619048	-0.0427509	-0.0468963	-0.0452202	-0.0265148	-0.039256	-0.027911	-0.0467636	-0.0423192	-0.0535385	-0.0628383	0.0657529	0.0701203	-0.0283252	-0.0279631	-0.0436578	0.0694612	-0.0624446	-0.061571	-0.0471175	-0.0551516	-0.04775	-0.0603355
Pcnp:ENSMUST00000114444.8	0.0921063	0.0762241	0.0714244	-0.0772757	-0.0620548	-0.0872824	0.0829967	-0.0849813	0.0762513	-0.0645267	-0.0639771	-0.0618473	-0.0844457	-0.0764412	-0.0705507	-0.0660536	-0.0633	-0.0645786	-0.0616255	-0.0934254	-0.066705	-0.0733258	-0.0948403	0.0794211	0.0859667	-0.0631915	-0.0705373	-0.0781755	0.0592628	-0.0442318	-0.0714715	-0.0664135	-0.0725274	-0.0605296	-0.0602493
Exoc3:ENSMUST00000035934.6	0.108615	0.0837837	0.0767815	-0.091036	-0.0696577	-0.0891988	0.0784838	-0.0736013	0.0951261	-0.0687312	-0.0891957	-0.0706134	-0.114315	-0.0869401	-0.0859142	-0.071132	-0.0662333	-0.0812507	-0.0689635	-0.0935878	-0.0789843	-0.0931608	-0.0992932	0.0761344	0.0996366	-0.0755093	-0.0463892	-0.0907873	0.0742857	-0.0745247	-0.0793103	-0.0792655	-0.0680479	-0.0785148	-0.0754388
Cxadr:ENSMUST00000023572.14	0.089822	0.0438759	0.0724028	-0.0609565	-0.0564723	-0.0711007	0.0691049	-0.0619877	0.0686053	-0.0509564	-0.0404783	-0.0776317	-0.0746907	-0.0772337	-0.0698381	-0.0740103	-0.0433697	-0.0657994	-0.0739744	-0.0834354	-0.0567453	-0.062137	-0.0824373	0.0665465	0.0681914	-0.050397	-0.0591831	-0.0809561	0.052215	-0.0561915	-0.0706391	-0.0617152	-0.0630225	-0.0517494	-0.0638362
Rab11a:ENSMUST00000169058.7	0.0812568	0.0730536	0.0657148	-0.0625098	-0.049569	-0.07689	0.0812633	-0.0551322	0.0741487	-0.0610501	-0.0400465	-0.0766689	-0.0821921	-0.0608098	-0.0640497	-0.0639646	-0.0373219	-0.0602464	-0.0484221	-0.0778914	-0.0575572	-0.0599839	-0.07819	0.0850342	0.0719997	-0.0638376	-0.0392727	-0.0772086	0.0664209	-0.0543827	-0.0456484	-0.0554774	-0.0620153	-0.0539035	-0.0536605
Actr3b:ENSMUST00000128727.7	0.0954491	0.126399	0.125619	-0.113457	-0.0769345	-0.110978	0.121583	-0.0713824	0.116093	-0.0901447	-0.0873265	-0.112806	-0.0862505	-0.0830756	-0.076621	-0.075362	-0.0648994	-0.0884638	-0.0480058	-0.117098	-0.0882911	-0.0785343	-0.114234	0.104232	0.145123	-0.0724208	-0.0651341	-0.090418	0.138365	-0.0869015	-0.0789041	-0.0730112	-0.090668	-0.0684452	-0.0888297
Chchd5:ENSMUST00000035481.4	0.092163	0.0891584	0.0786902	-0.0643726	-0.0492888	-0.0848485	0.106257	-0.0417644	0.0903508	-0.062394	-0.0497071	-0.0684021	-0.0579454	-0.059827	-0.0555104	-0.0415726	-0.0440155	-0.0490209	-0.0422536	-0.0718497	-0.0602462	-0.064397	-0.0747154	0.097426	0.0884835	-0.0487812	-0.0363432	-0.0742237	0.0734028	-0.0643457	-0.0480058	-0.0403589	-0.0495455	-0.0570214	-0.0580735
Gpbp1:ENSMUST00000047627.13	0.0759346	0.0521928	0.052259	-0.0493649	-0.049066	-0.0621277	0.0684626	-0.0319873	0.0717706	-0.0497792	-0.0417292	-0.066935	-0.0595456	-0.0614997	-0.0496772	-0.0493709	-0.0352636	-0.0388711	-0.0354798	-0.0676573	-0.0564335	-0.040079	-0.068132	0.068357	0.0675009	-0.0525458	-0.0410477	-0.0546842	0.0648261	-0.0438331	-0.0385545	-0.0398084	-0.0490335	-0.0535124	-0.0444307
Rprd1a:ENSMUST00000046206.4	0.0960853	0.0833055	0.0652969	-0.0823638	-0.0671163	-0.093249	0.0762116	-0.0744009	0.108599	-0.0659016	-0.0981686	-0.0625039	-0.0865083	-0.087019	-0.0680903	-0.0521029	-0.0723216	-0.0785559	-0.0784744	-0.0967473	-0.054403	-0.0677298	-0.100922	0.0655244	0.0985281	-0.0786151	-0.0544485	-0.083724	0.0652294	-0.063019	-0.0733089	-0.07508	-0.079048	-0.0628163	-0.0798168
Cpsf6:ENSMUST00000176686.7	0.0982501	0.0726796	0.0695535	-0.0789566	-0.047862	-0.0851286	0.082083	-0.0790641	0.0810658	-0.0753186	-0.0634837	-0.0769751	-0.0894296	-0.0825626	-0.0654926	-0.0532276	-0.0589892	-0.0661052	-0.0553248	-0.0889058	-0.0710524	-0.0777157	-0.105682	0.100326	0.0894744	-0.0669576	-0.0569543	-0.0927908	0.0707468	-0.0593929	-0.0733881	-0.0793854	-0.0712708	-0.0539507	-0.0552339
Smarca5:ENSMUST00000043359.8	0.0477835	0.0447239	0.0418227	-0.0517274	-0.035423	-0.0405526	0.0468983	-0.0391717	0.0573354	-0.0337914	-0.0305497	-0.0234742	-0.0734671	-0.046382	-0.033377	-0.0332862	-0.0431455	-0.029957	-0.0276357	-0.0553256	-0.0426274	-0.0290494	-0.0469791	0.0488538	0.0358492	-0.0310485	-0.0282528	-0.04686	0.0332482	-0.0266116	-0.0344799	-0.0356839	-0.0273257	-0.0229123	-0.0322261
Rtn3:ENSMUST00000088169.6	0.121141	0.11003	0.101158	-0.105722	-0.0846941	-0.111172	0.109274	-0.0894014	0.109753	-0.0887249	-0.0842225	-0.0951562	-0.0898225	-0.109511	-0.0914087	-0.0894732	-0.077869	-0.104199	-0.0974642	-0.114723	-0.0910108	-0.0943489	-0.128917	0.0890082	0.114494	-0.0989164	-0.0774577	-0.110578	0.0919602	-0.0864701	-0.0877141	-0.0958385	-0.103254	-0.0817315	-0.0931973
Bclaf1:ENSMUST00000092678.9	0.153746	0.140202	0.128888	-0.142183	-0.0996065	-0.147361	0.108009	-0.1305	0.154678	-0.108076	-0.131717	-0.0928763	-0.13973	-0.139315	-0.11519	-0.109756	-0.107089	-0.124671	-0.121103	-0.157351	-0.128609	-0.118344	-0.161176	0.117809	0.148214	-0.112682	-0.101723	-0.138873	0.119478	-0.0683497	-0.127589	-0.134451	-0.128962	-0.0944587	-0.092095
Cadm1:ENSMUST00000114548.7	0.007438	-0.0118807	-0.0196557	0.015077	0.0197186	0.0220381	0.00488886	0.00388337	-0.021727	0.0058905	0.0240647	-0.00458992	-0.0333082	0.015507	0.00531863	0.0178785	0.0140275	0.0147845	0.033573	-0.00165318	-0.000218064	0.00890835	-0.0083042	-0.0053531	-0.0126365	0.00786119	0.0162722	0.00513698	-0.0012967	0.0232596	0.00618886	-0.00116822	-0.00791045	0.0208467	0.0260422
Usp15:ENSMUST00000220377.1	0.177053	0.15576	0.149706	-0.177408	-0.155041	-0.174605	0.153074	-0.136692	0.177088	-0.133415	-0.136988	-0.168192	-0.183733	-0.150622	-0.145937	-0.145986	-0.143633	-0.172059	-0.145494	-0.197279	-0.124856	-0.152884	-0.211009	0.133197	0.167076	-0.159762	-0.13692	-0.158432	0.125018	-0.117982	-0.169778	-0.170979	-0.158271	-0.161214	-0.154236
Lman2:ENSMUST00000021940.7	0.157251	0.147969	0.135023	-0.157051	-0.127866	-0.187387	0.136194	-0.133957	0.169764	-0.123917	-0.147531	-0.101507	-0.128341	-0.137688	-0.113527	-0.107053	-0.119528	-0.140743	-0.127648	-0.177457	-0.113306	-0.133656	-0.173302	0.119493	0.170743	-0.142888	-0.11988	-0.153648	0.119578	-0.0960954	-0.111641	-0.119358	-0.120188	-0.10757	-0.127134
Bri3bp:ENSMUST00000049040.13	0.12393	0.0983313	0.0825055	-0.109051	-0.077367	-0.127828	0.0915902	-0.10621	0.116691	-0.0851631	-0.098807	-0.0797103	-0.107347	-0.115298	-0.0811991	-0.0768781	-0.0784618	-0.0952476	-0.0842963	-0.121719	-0.103546	-0.0847153	-0.131867	0.0985875	0.106238	-0.105552	-0.0640113	-0.109893	0.0929773	-0.0649548	-0.0924509	-0.0890819	-0.0895504	-0.0807387	-0.099284
Cyb5b:ENSMUST00000034400.4	0.207461	0.162792	0.168547	-0.202979	-0.146063	-0.215257	0.17358	-0.17007	0.217155	-0.142929	-0.187484	-0.138865	-0.191318	-0.189121	-0.156194	-0.158238	-0.156601	-0.182413	-0.183418	-0.217418	-0.162779	-0.160912	-0.23042	0.174111	0.215084	-0.171833	-0.152671	-0.193433	0.166436	-0.129496	-0.168452	-0.169052	-0.167107	-0.13897	-0.159398
Marchf5:ENSMUST00000024078.14	0.0991927	0.0712888	0.0697096	-0.0824991	-0.0686337	-0.089868	0.0835611	-0.0747878	0.0907256	-0.0587796	-0.0721186	-0.0641016	-0.0960858	-0.0817502	-0.0678919	-0.0724763	-0.0512024	-0.0644098	-0.0668456	-0.0907684	-0.0673921	-0.0708185	-0.100824	0.08364	0.0907763	-0.0675942	-0.0553624	-0.0807888	0.0740086	-0.0629606	-0.0659101	-0.0718535	-0.0785583	-0.0702387	-0.0697243
Tmed10:ENSMUST00000040766.8	0.105655	0.0815359	0.0740385	-0.0918285	-0.0792801	-0.0984659	0.0957432	-0.0728643	0.0988095	-0.07536	-0.0756437	-0.0751202	-0.0884172	-0.0899053	-0.0822669	-0.076506	-0.0663152	-0.081663	-0.0901636	-0.0960362	-0.0643625	-0.0817112	-0.103843	0.0795183	0.0911129	-0.0769749	-0.0673997	-0.0925074	0.0785296	-0.0636754	-0.072027	-0.0899938	-0.0793105	-0.0726686	-0.0706462
Brd8:ENSMUST00000003876.9	0.12228	0.104379	0.0979838	-0.120839	-0.0838886	-0.120103	0.117272	-0.101517	0.112183	-0.0968874	-0.0696496	-0.105155	-0.11797	-0.103727	-0.111771	-0.0983117	-0.0970601	-0.109372	-0.0866294	-0.127026	-0.0963123	-0.0943165	-0.139478	0.0919374	0.122311	-0.0977902	-0.085636	-0.104514	0.0785488	-0.0816888	-0.100011	-0.116575	-0.102484	-0.0818195	-0.0931384
Rbm25:ENSMUST00000048155.15	0.0907055	0.0775214	0.079538	-0.0816909	-0.078477	-0.0947425	0.0786985	-0.0707373	0.0884517	-0.0836603	-0.0701248	-0.069152	-0.08851	-0.092091	-0.0678212	-0.0763031	-0.0578129	-0.0938491	-0.0866577	-0.110115	-0.0740706	-0.0894572	-0.0968072	0.0771709	0.104976	-0.0866318	-0.0767663	-0.0859646	0.0584767	-0.0525149	-0.0693151	-0.0833746	-0.0748978	-0.0592182	-0.0623991
Rbbp6:ENSMUST00000098062.8	0.0983931	0.0664051	0.0765865	-0.0657201	-0.0494418	-0.0730825	0.0822697	-0.0435002	0.0833875	-0.0564369	-0.0378124	-0.0458717	-0.0910234	-0.0763633	-0.0629451	-0.0672236	-0.0461202	-0.0598089	-0.0578055	-0.0830173	-0.0690896	-0.0706635	-0.0828086	0.072267	0.0679672	-0.0624005	-0.0358846	-0.0830335	0.0712754	-0.0625933	-0.0394671	-0.067533	-0.0594761	-0.0630227	-0.0638923
Rbx1:ENSMUST00000023036.6	0.156139	0.127988	0.12447	-0.128352	-0.0992931	-0.15074	0.151558	-0.086526	0.154921	-0.1132	-0.104774	-0.116469	-0.146567	-0.131866	-0.101774	-0.108467	-0.0920064	-0.133035	-0.0960021	-0.138306	-0.118985	-0.127735	-0.163271	0.137043	0.166172	-0.137475	-0.0849134	-0.13182	0.117176	-0.114919	-0.110574	-0.117633	-0.112262	-0.108238	-0.126217
Ppp6c:ENSMUST00000028087.5	0.115287	0.0797571	0.0831195	-0.0766512	-0.059565	-0.103408	0.0964968	-0.091114	0.0957596	-0.070802	-0.0842036	-0.0535863	-0.0951604	-0.0872015	-0.0823097	-0.0782025	-0.070922	-0.091289	-0.067074	-0.105748	-0.074523	-0.086009	-0.118387	0.0812167	0.0970185	-0.0737591	-0.0748402	-0.0905095	0.0592559	-0.0517718	-0.0755053	-0.0695723	-0.0831526	-0.0732307	-0.0709349
Tomm70a:ENSMUST00000166897.2	0.15456	0.118102	0.130471	-0.142802	-0.0994414	-0.157034	0.155724	-0.116586	0.147217	-0.104659	-0.113174	-0.116033	-0.140897	-0.14476	-0.120503	-0.108994	-0.113036	-0.119515	-0.117689	-0.156763	-0.110087	-0.136476	-0.158432	0.132484	0.148204	-0.12267	-0.106098	-0.134977	0.126657	-0.0878347	-0.116615	-0.120334	-0.12321	-0.104767	-0.106476
Tbpl1:ENSMUST00000127698.7	0.136106	0.0959194	0.105782	-0.0969966	-0.0764547	-0.115566	0.118142	-0.0936543	0.108643	-0.0794788	-0.0923549	-0.0733167	-0.11349	-0.0972832	-0.0881167	-0.0988197	-0.0725716	-0.0977907	-0.0876181	-0.119897	-0.0906102	-0.0939241	-0.13137	0.107233	0.117904	-0.0947133	-0.0854489	-0.121706	0.0756472	-0.0652823	-0.0887791	-0.103971	-0.0906578	-0.086039	-0.0787085
Pnisr:ENSMUST00000098238.8	0.0899658	0.0722097	0.0822807	-0.0653771	-0.0609145	-0.0927913	0.0824096	-0.0585379	0.0918706	-0.061298	-0.0667117	-0.0695394	-0.067794	-0.0749032	-0.0520335	-0.0627039	-0.0551905	-0.0666092	-0.0686684	-0.0887307	-0.0607882	-0.0723863	-0.0918481	0.0679262	0.0957467	-0.0731208	-0.0535412	-0.0841108	0.0661204	-0.0570297	-0.0698793	-0.0644211	-0.0518311	-0.0481918	-0.0729472
Fam168b:ENSMUST00000167518.7	0.127185	0.101415	0.0971714	-0.123233	-0.0767762	-0.119906	0.112103	-0.0882701	0.117019	-0.0866188	-0.104114	-0.0873135	-0.104925	-0.118969	-0.0931116	-0.0963902	-0.0792846	-0.113296	-0.100925	-0.131096	-0.090194	-0.106735	-0.130788	0.0883368	0.121393	-0.100855	-0.0835823	-0.114805	0.0914126	-0.0767305	-0.0960538	-0.100388	-0.0950791	-0.0839548	-0.0810224
Pitpna:ENSMUST00000143219.7	0.103026	0.0762571	0.093341	-0.102351	-0.0772804	-0.10266	0.0917643	-0.0896987	0.108034	-0.0720328	-0.0884448	-0.0915085	-0.094115	-0.0974682	-0.0887196	-0.0938429	-0.0778305	-0.0922621	-0.0781381	-0.116814	-0.0798352	-0.0946199	-0.124801	0.0804358	0.100373	-0.0916014	-0.0743066	-0.0984305	0.0904935	-0.0878356	-0.0761334	-0.0785524	-0.0822635	-0.090062	-0.0897349
Atf7ip:ENSMUST00000032335.12	0.0792155	0.0546359	0.0553545	-0.0635013	-0.0427444	-0.0736864	0.0675639	-0.0541937	0.0514209	-0.0480373	-0.0518126	-0.0662479	-0.0771814	-0.0498449	-0.0618976	-0.0772972	-0.0449448	-0.0589509	-0.0540992	-0.0773442	-0.0493493	-0.0578744	-0.0795063	0.0699609	0.057608	-0.0473942	-0.0561468	-0.0797746	0.0390428	-0.0399081	-0.0565629	-0.0581871	-0.0612198	-0.0395301	-0.0449633
Poc5:ENSMUST00000099295.5	0.103992	0.0884115	0.06475	-0.0746476	-0.056978	-0.0882507	0.0826881	-0.0642855	0.0982233	-0.0714457	-0.0696676	-0.0796912	-0.107278	-0.0943273	-0.0734844	-0.0817963	-0.0618693	-0.0813782	-0.0658197	-0.0995006	-0.0706798	-0.0875804	-0.107207	0.105092	0.102029	-0.0754141	-0.0721742	-0.0850562	0.0744263	-0.0600206	-0.0717399	-0.0679678	-0.0703624	-0.0582456	-0.0672719
Rgmb:ENSMUST00000170578.2	0.107771	0.0688022	0.0830254	-0.0674714	-0.05596	-0.0874929	0.083579	-0.0481843	0.090417	-0.0622686	-0.0521484	-0.0785617	-0.0904167	-0.0767701	-0.0516284	-0.0557211	-0.0256118	-0.0749393	-0.056162	-0.0751631	-0.058364	-0.0788087	-0.0882752	0.0709785	0.0856086	-0.080189	-0.0377641	-0.0701482	0.0686305	-0.068203	-0.0587999	-0.0718796	-0.0554016	-0.056363	-0.0643491
Cyrib:ENSMUST00000063838.10	0.173937	0.126282	0.124944	-0.146155	-0.0994776	-0.152201	0.151938	-0.138423	0.153482	-0.116242	-0.115269	-0.130537	-0.156729	-0.151043	-0.121379	-0.127401	-0.096164	-0.131382	-0.109615	-0.164325	-0.130068	-0.13015	-0.194344	0.147483	0.159822	-0.127353	-0.108937	-0.164103	0.121803	-0.107807	-0.126482	-0.146968	-0.150972	-0.119749	-0.11534
Lsm14a:ENSMUST00000085585.11	0.0899345	0.07835	0.0804311	-0.0741905	-0.0594279	-0.0857679	0.0983402	-0.0707033	0.078559	-0.0658778	-0.0657865	-0.0591245	-0.0943221	-0.0888148	-0.0681988	-0.0570987	-0.058178	-0.0714688	-0.067008	-0.0827964	-0.0813015	-0.0650902	-0.104121	0.087427	0.0840571	-0.0668049	-0.067702	-0.0875848	0.0701424	-0.04578	-0.0603902	-0.0558563	-0.0689472	-0.062727	-0.0543976
Srsf3:ENSMUST00000130216.2	0.112177	0.0951048	0.0868457	-0.0901643	-0.0635767	-0.102091	0.108713	-0.0715332	0.103919	-0.0816457	-0.0643877	-0.0877441	-0.094588	-0.0923654	-0.0700936	-0.0710006	-0.0616689	-0.0835769	-0.0657269	-0.0983821	-0.081171	-0.0824313	-0.120213	0.0972559	0.106301	-0.0844736	-0.0659977	-0.099022	0.0819651	-0.0873413	-0.0770268	-0.0890891	-0.0961764	-0.0779593	-0.0877369
Nmt1:ENSMUST00000021314.7	0.107519	0.0843509	0.0841803	-0.0972963	-0.0622614	-0.0993834	0.0843791	-0.0738441	0.100995	-0.0726677	-0.0919971	-0.0606693	-0.0999385	-0.105791	-0.0874914	-0.0697111	-0.0549823	-0.0812101	-0.0785219	-0.112622	-0.100785	-0.0777581	-0.10251	0.0941823	0.127946	-0.077485	-0.0659435	-0.0961569	0.0952491	-0.065593	-0.0877859	-0.0815224	-0.0877405	-0.0690674	-0.0599279
Gspt1:ENSMUST00000167571.7	0.154928	0.147551	0.108075	-0.143376	-0.109584	-0.153479	0.118551	-0.111989	0.151293	-0.111835	-0.134242	-0.122541	-0.154081	-0.153181	-0.126189	-0.108098	-0.109307	-0.133143	-0.113326	-0.144257	-0.132666	-0.106114	-0.173832	0.145645	0.152914	-0.139861	-0.0958208	-0.156339	0.14221	-0.108273	-0.12901	-0.132167	-0.136721	-0.095723	-0.105402
Fip1l1:ENSMUST00000113536.7	0.119187	0.101495	0.104031	-0.105412	-0.0670245	-0.107974	0.114142	-0.0994605	0.115918	-0.0806292	-0.0843647	-0.0868238	-0.103578	-0.0946824	-0.0964222	-0.0824961	-0.0652788	-0.0913759	-0.0861826	-0.115167	-0.0856818	-0.0838074	-0.117388	0.0999704	0.120626	-0.0853452	-0.0702353	-0.114366	0.0831192	-0.0793151	-0.0859567	-0.0852224	-0.0941865	-0.081592	-0.0839603
Ube2i:ENSMUST00000049911.15	0.158453	0.132055	0.121792	-0.135377	-0.0930925	-0.151663	0.150049	-0.109152	0.148038	-0.107733	-0.114984	-0.126543	-0.132764	-0.135146	-0.110818	-0.106054	-0.0981457	-0.132258	-0.104124	-0.142722	-0.121959	-0.116777	-0.171883	0.1216	0.154984	-0.128826	-0.0987979	-0.136963	0.118248	-0.114702	-0.107999	-0.123949	-0.129899	-0.107611	-0.118585
Sipa1l1:ENSMUST00000222298.1	0.167074	0.118038	0.149776	-0.120915	-0.097404	-0.15325	0.142985	-0.111834	0.138824	-0.0899482	-0.102175	-0.0934085	-0.128365	-0.139863	-0.126844	-0.11582	-0.0942221	-0.128026	-0.122208	-0.147356	-0.10159	-0.121386	-0.154169	0.124841	0.147218	-0.103454	-0.0959897	-0.129205	0.11506	-0.0932888	-0.108798	-0.0999892	-0.113283	-0.0699639	-0.116412
Pafah1b1:ENSMUST00000021091.14	0.175102	0.143446	0.143809	-0.162725	-0.107909	-0.160133	0.156601	-0.125165	0.178342	-0.126199	-0.124303	-0.130615	-0.16068	-0.15639	-0.124382	-0.117427	-0.108484	-0.135721	-0.118089	-0.161764	-0.138712	-0.138475	-0.175726	0.149808	0.166739	-0.133425	-0.112085	-0.161449	0.136532	-0.127764	-0.139229	-0.142959	-0.137516	-0.111362	-0.133031
Trim37:ENSMUST00000041282.12	0.256834	0.186855	0.181	-0.209001	-0.154693	-0.19908	0.214329	-0.149357	0.229739	-0.170113	-0.157015	-0.195515	-0.201357	-0.1969	-0.146461	-0.149653	-0.150625	-0.187884	-0.131285	-0.193234	-0.186655	-0.168476	-0.24105	0.223689	0.235532	-0.173977	-0.11535	-0.210096	0.186756	-0.16636	-0.166518	-0.178018	-0.181347	-0.147778	-0.176804
Asf1a:ENSMUST00000020004.7	0.13678	0.105638	0.107956	-0.122268	-0.0879508	-0.131877	0.117731	-0.110427	0.122588	-0.0918713	-0.0938684	-0.10164	-0.121803	-0.121119	-0.0858185	-0.0887078	-0.0868367	-0.109265	-0.0998241	-0.140573	-0.103544	-0.100779	-0.153487	0.135512	0.138827	-0.110594	-0.0930972	-0.124285	0.0912411	-0.0877567	-0.109596	-0.10422	-0.111468	-0.0861562	-0.0947381
Rnmt:ENSMUST00000009679.10	0.103533	0.0699617	0.0914805	-0.0987034	-0.0711678	-0.105944	0.101299	-0.0861734	0.114457	-0.0801553	-0.0710933	-0.074591	-0.0953131	-0.0983841	-0.079184	-0.0916433	-0.0811051	-0.0899566	-0.078264	-0.113648	-0.0874187	-0.0811907	-0.110987	0.109022	0.110867	-0.0784474	-0.0768642	-0.116179	0.0782678	-0.0751807	-0.0824784	-0.0841912	-0.0872122	-0.0751453	-0.078634
Ylpm1:ENSMUST00000021670.14	0.143991	0.093339	0.111971	-0.121249	-0.0804624	-0.143486	0.115173	-0.0832386	0.129096	-0.107371	-0.0951752	-0.0993042	-0.128666	-0.120124	-0.102794	-0.102575	-0.109259	-0.126674	-0.0883008	-0.115376	-0.107437	-0.11847	-0.159379	0.139275	0.12575	-0.109875	-0.0825828	-0.134931	0.0906822	-0.0936938	-0.118158	-0.105346	-0.12052	-0.101593	-0.103647
Sec22b:ENSMUST00000029476.8	0.113502	0.11184	0.114939	-0.115348	-0.0817547	-0.127074	0.12857	-0.0961933	0.134151	-0.089824	-0.105816	-0.094757	-0.106366	-0.121171	-0.0882037	-0.0936356	-0.086019	-0.104447	-0.0972577	-0.112886	-0.107692	-0.0993116	-0.139227	0.112901	0.13134	-0.0982396	-0.101436	-0.125126	0.109616	-0.0852995	-0.108341	-0.102603	-0.110866	-0.0893917	-0.0912939
Opa1:ENSMUST00000160597.7	0.216865	0.148121	0.17456	-0.184758	-0.142293	-0.196904	0.198789	-0.156081	0.203032	-0.147116	-0.124024	-0.174947	-0.195746	-0.18153	-0.194068	-0.165532	-0.132499	-0.175518	-0.179073	-0.19132	-0.158603	-0.153136	-0.229446	0.182037	0.205991	-0.169134	-0.157555	-0.183155	0.139572	-0.163505	-0.181568	-0.160925	-0.159191	-0.15294	-0.17267
Zfp101:ENSMUST00000174512.3	0.0930385	0.042069	0.0820142	-0.0716135	-0.0460928	-0.078458	0.085541	-0.0547788	0.0824848	-0.0378367	-0.059114	-0.0333969	-0.0403431	-0.065725	-0.0365365	-0.0551467	-0.0457228	-0.075084	-0.0466595	-0.0793301	-0.0580242	-0.0688114	-0.080025	0.0583496	0.0795513	-0.0834517	-0.0390815	-0.061174	0.0563698	-0.0658332	-0.0640429	-0.0461687	-0.0513323	-0.0479125	-0.057017
Pmpca:ENSMUST00000076431.12	0.144998	0.11815	0.106991	-0.131946	-0.111873	-0.156989	0.129155	-0.126892	0.156464	-0.104746	-0.127263	-0.0970224	-0.122334	-0.138106	-0.106396	-0.103276	-0.107406	-0.127865	-0.120885	-0.157599	-0.108756	-0.107014	-0.162809	0.13091	0.146595	-0.109859	-0.109736	-0.131674	0.114699	-0.0911532	-0.114851	-0.11917	-0.124251	-0.111497	-0.114245
Zrsr2:ENSMUST00000090840.9	0.0901772	0.0629851	0.0714147	-0.0816124	-0.0699049	-0.0905916	0.0763995	-0.06011	0.0878364	-0.0758172	-0.0612671	-0.0718777	-0.0719098	-0.0760049	-0.056182	-0.0651804	-0.0684733	-0.0777146	-0.0497814	-0.087527	-0.0703969	-0.0733289	-0.0920974	0.0745117	0.0881944	-0.0690238	-0.0570785	-0.0710666	0.0693535	-0.0565642	-0.0593706	-0.0801328	-0.0777889	-0.0687812	-0.0713669
Crebbp:ENSMUST00000023165.8	0.098104	0.0986731	0.0675721	-0.083438	-0.0708373	-0.0975376	0.0783564	-0.0675406	0.0991561	-0.0820377	-0.0740671	-0.0872914	-0.0805342	-0.0849885	-0.0725765	-0.0772935	-0.0676047	-0.0948302	-0.0699696	-0.0899075	-0.0920425	-0.0775164	-0.0869825	0.0889802	0.0916302	-0.0847395	-0.0475715	-0.0888969	0.0659757	-0.0795036	-0.0850561	-0.0754154	-0.0871404	-0.0831212	-0.087278
Mtpn:ENSMUST00000031866.8	0.172521	0.119034	0.133433	-0.146827	-0.135459	-0.165677	0.147879	-0.120946	0.169921	-0.116011	-0.138227	-0.095782	-0.141884	-0.160663	-0.12851	-0.125506	-0.113521	-0.14924	-0.132015	-0.15624	-0.11122	-0.140027	-0.182192	0.123683	0.15805	-0.142732	-0.1264	-0.141301	0.126051	-0.094707	-0.132655	-0.130689	-0.141475	-0.114476	-0.12339
Isy1:ENSMUST00000089497.6	0.0843611	0.0620609	0.0491943	-0.0775736	-0.0562324	-0.08831	0.0808388	-0.0750142	0.0806727	-0.0655696	-0.0694712	-0.0467319	-0.064506	-0.0708438	-0.0664033	-0.0566906	-0.0672286	-0.0794033	-0.0749894	-0.108993	-0.0707479	-0.0586222	-0.0976203	0.0730834	0.088785	-0.0648955	-0.0541894	-0.082847	0.0599445	-0.0533298	-0.0776409	-0.0941176	-0.0615332	-0.062287	-0.0478032
Rcn2:ENSMUST00000114276.2	0.123388	0.093672	0.0986056	-0.107838	-0.0829145	-0.115509	0.0998351	-0.0943942	0.111653	-0.0827282	-0.124775	-0.0689031	-0.097664	-0.10953	-0.0825644	-0.0912528	-0.0813267	-0.0920861	-0.0703278	-0.114264	-0.0864479	-0.088709	-0.131323	0.0928118	0.12006	-0.0977239	-0.0810749	-0.0970616	0.109086	-0.0850705	-0.0876796	-0.0875708	-0.0908284	-0.0818084	-0.0929857
Fbxo3:ENSMUST00000111136.7	0.0521665	0.0378242	0.0497543	-0.0486595	-0.0444903	-0.051923	0.0482553	-0.0295165	0.0539472	-0.0486498	-0.0349456	-0.0456441	-0.0395049	-0.0353738	-0.0429419	-0.042553	-0.0324753	-0.0533685	-0.0296116	-0.0366472	-0.0315372	-0.0470653	-0.0632215	0.0511573	0.0475883	-0.0446005	-0.0506961	-0.0431998	0.0345345	-0.0295425	-0.0460724	-0.0472969	-0.0424968	-0.0445114	-0.0348194
Lztfl1:ENSMUST00000026274.13	0.151636	0.141479	0.108159	-0.137001	-0.0885588	-0.137132	0.127584	-0.109333	0.150899	-0.115621	-0.1193	-0.118843	-0.139605	-0.146361	-0.104934	-0.0995443	-0.0956018	-0.110342	-0.107262	-0.16114	-0.100017	-0.119784	-0.143596	0.131209	0.151669	-0.115493	-0.0975591	-0.137278	0.133236	-0.0971816	-0.103183	-0.114739	-0.106071	-0.101859	-0.113274
Ipo9:ENSMUST00000041023.13	0.124845	0.0924095	0.0848934	-0.13095	-0.094424	-0.130505	0.103978	-0.0951643	0.140806	-0.0869241	-0.109401	-0.103864	-0.115591	-0.11629	-0.121735	-0.0893078	-0.0810718	-0.110028	-0.0983662	-0.129267	-0.102966	-0.111513	-0.134113	0.111951	0.128209	-0.111673	-0.0967631	-0.108416	0.0978002	-0.0760231	-0.110685	-0.0992487	-0.117038	-0.0900471	-0.0939971
Sec62:ENSMUST00000029256.8	0.104202	0.0906816	0.0880138	-0.0980471	-0.0800925	-0.110212	0.0903469	-0.0838596	0.107361	-0.0893033	-0.077049	-0.0815331	-0.0870752	-0.106628	-0.0809881	-0.079844	-0.0783881	-0.0821551	-0.0947915	-0.117143	-0.08775	-0.080543	-0.115046	0.0897506	0.115476	-0.0753291	-0.0742511	-0.0908586	0.0800507	-0.0848608	-0.0793527	-0.0806176	-0.0918429	-0.0949356	-0.101614
Golt1b:ENSMUST00000032372.6	0.11451	0.104602	0.0840707	-0.0961942	-0.0665685	-0.123908	0.10407	-0.098768	0.126766	-0.0679658	-0.107579	-0.0798446	-0.0848961	-0.100592	-0.0859018	-0.0615779	-0.0995539	-0.098533	-0.0805868	-0.101559	-0.0847634	-0.10052	-0.122278	0.0876797	0.124501	-0.082156	-0.0587774	-0.093523	0.0863053	-0.100789	-0.0941854	-0.0836118	-0.0945383	-0.0926584	-0.0924299
Zzz3:ENSMUST00000106100.8	0.116	0.0907935	0.103985	-0.121784	-0.0906154	-0.133961	0.101867	-0.115399	0.124344	-0.0871945	-0.11498	-0.0822316	-0.116277	-0.111387	-0.0908592	-0.0981201	-0.0835328	-0.0944635	-0.11064	-0.145669	-0.0938909	-0.107721	-0.131006	0.121015	0.136432	-0.102579	-0.0901421	-0.107934	0.0977803	-0.10513	-0.11324	-0.118783	-0.124567	-0.0972282	-0.112123
Lmo3:ENSMUST00000162772.7	0.0848508	0.100077	0.0633756	-0.110818	-0.0689978	-0.106363	0.0736838	-0.103005	0.109291	-0.0878816	-0.0827146	-0.0815803	-0.0907893	-0.0990843	-0.0682372	-0.0854372	-0.0749137	-0.0936014	-0.0841276	-0.110761	-0.0780701	-0.0741941	-0.120762	0.0723393	0.102871	-0.092165	-0.0765338	-0.0955792	0.0821886	-0.0731443	-0.0820357	-0.0898164	-0.0991332	-0.0782748	-0.0875645
Zfr:ENSMUST00000122941.7	0.104321	0.0901611	0.0881583	-0.10046	-0.0692325	-0.109857	0.0859138	-0.0784699	0.10278	-0.081524	-0.0973066	-0.0827838	-0.0970278	-0.0803874	-0.0868436	-0.100737	-0.0875083	-0.0942591	-0.0787709	-0.105689	-0.0821102	-0.0859919	-0.120481	0.0813309	0.10918	-0.0920861	-0.0823595	-0.0971141	0.101858	-0.0628387	-0.0619398	-0.0891991	-0.0950115	-0.0701584	-0.093016
Eif4ebp2:ENSMUST00000020288.14	0.108618	0.0668578	0.0787235	-0.0934389	-0.0776873	-0.0914779	0.0903999	-0.0826225	0.0983279	-0.0619897	-0.0823404	-0.0763414	-0.0613144	-0.0867052	-0.0748582	-0.072317	-0.0605704	-0.08726	-0.0881806	-0.104527	-0.0765108	-0.0697711	-0.0985972	0.0892206	0.0820851	-0.0923101	-0.0709718	-0.0836227	0.0577091	-0.0598483	-0.0840522	-0.0834019	-0.0928953	-0.0662427	-0.0697742
Tcaf1:ENSMUST00000045054.10	0.0270304	0.00821079	0.00718744	-0.0169172	-0.0209375	-0.0236652	0.00919405	-0.0156584	0.0380412	-0.0244256	-0.0195829	-0.0187009	-0.00785285	-0.0132503	0.0035234	-0.00896583	-0.0100695	-0.0134301	-0.00910006	-0.0239432	8.99004e-05	-0.00574358	-0.0123651	0.0168143	0.0365461	-0.022714	-0.000870668	-0.0021844	0.00196341	-0.0213499	-0.0323137	-0.0203065	-0.0021491	0.000395461	-0.0121974
Dtx4:ENSMUST00000045521.8	0.153545	0.0951509	0.116079	-0.121453	-0.0929709	-0.132639	0.114327	-0.0962939	0.159423	-0.0980519	-0.110312	-0.104454	-0.140413	-0.128579	-0.097593	-0.0818262	-0.106073	-0.135144	-0.105411	-0.136854	-0.10751	-0.0980644	-0.143934	0.122094	0.130433	-0.112985	-0.0856069	-0.137188	0.100236	-0.0969622	-0.116544	-0.13268	-0.118728	-0.085687	-0.106858
Ppid:ENSMUST00000029382.12	0.069418	0.0514068	0.0592144	-0.05217	-0.0441973	-0.0657069	0.0774536	-0.0417652	0.0656277	-0.0497405	-0.0489279	-0.0501426	-0.0586929	-0.052535	-0.0411286	-0.0396575	-0.0293107	-0.0607403	-0.0415343	-0.0709349	-0.0489081	-0.0589487	-0.071877	0.0660333	0.0764968	-0.055599	-0.0380114	-0.0553374	0.0911339	-0.0510338	-0.0524895	-0.0524061	-0.0516323	-0.0459426	-0.0530463
Rras2:ENSMUST00000069449.6	0.0737066	0.0611303	0.0606804	-0.0461975	-0.053139	-0.0739099	0.0593799	-0.0636412	0.064928	-0.061373	-0.0503428	-0.0599017	-0.0621778	-0.056345	-0.056539	-0.0526426	-0.0599109	-0.0617776	-0.0487994	-0.0776294	-0.054183	-0.0549477	-0.0868319	0.0716525	0.069327	-0.0454471	-0.0549844	-0.0546358	0.0399228	-0.0593253	-0.0557264	-0.0561118	-0.0542325	-0.0527463	-0.0620447
Ppp4r2:ENSMUST00000063854.6	0.148091	0.129048	0.13968	-0.140616	-0.103248	-0.139886	0.145646	-0.117504	0.137253	-0.107723	-0.109586	-0.107359	-0.143309	-0.14109	-0.128549	-0.119997	-0.0935456	-0.13072	-0.118294	-0.160149	-0.11876	-0.126613	-0.167135	0.14124	0.150919	-0.135866	-0.10949	-0.150798	0.131185	-0.119071	-0.137544	-0.125802	-0.149937	-0.103585	-0.127283
Snu13:ENSMUST00000080622.8	0.112225	0.0908852	0.0939768	-0.0960111	-0.0752439	-0.109671	0.113542	-0.0701156	0.103259	-0.0813118	-0.0688947	-0.0895159	-0.105201	-0.0993711	-0.0827819	-0.0812606	-0.0672033	-0.098586	-0.0700141	-0.0986613	-0.0840664	-0.0840989	-0.128925	0.103036	0.107212	-0.0947697	-0.0716746	-0.103098	0.0885265	-0.0791819	-0.0823014	-0.0888769	-0.0894326	-0.0773004	-0.0855953
Arfrp1:ENSMUST00000170190.7	0.0740298	0.0637868	0.0524379	-0.0595384	-0.0351182	-0.0701583	0.0772502	-0.0496585	0.0639116	-0.0554004	-0.0468064	-0.0520392	-0.0663648	-0.069375	-0.0579978	-0.0480896	-0.0452003	-0.0766437	-0.0464807	-0.0654026	-0.0583004	-0.0579798	-0.077131	0.0603648	0.0715649	-0.0670565	-0.0458635	-0.0722159	0.0507118	-0.0425722	-0.0453561	-0.0518794	-0.0557194	-0.0431619	-0.0465139
Spin1:ENSMUST00000095797.5	0.123541	0.0949505	0.100008	-0.102436	-0.078678	-0.112526	0.119299	-0.0806517	0.110073	-0.0938667	-0.0856308	-0.100167	-0.107269	-0.108793	-0.0997014	-0.103804	-0.0650227	-0.0989482	-0.0895024	-0.113024	-0.083925	-0.0989365	-0.132284	0.109161	0.108643	-0.0981685	-0.0875611	-0.105676	0.0819582	-0.0770481	-0.0881473	-0.111682	-0.0977907	-0.076943	-0.0875217
Armcx3:ENSMUST00000086884.4	0.0878251	0.0669775	0.058212	-0.0727345	-0.0580023	-0.0793443	0.0927414	-0.0636318	0.069401	-0.0629591	-0.0335403	-0.0956733	-0.0975304	-0.0777126	-0.0753125	-0.0676588	-0.0407872	-0.0599819	-0.0500807	-0.0812475	-0.0674666	-0.0700079	-0.0879844	0.0735004	0.0710142	-0.0481455	-0.0494769	-0.0811312	0.063824	-0.0647403	-0.0635767	-0.0872123	-0.086111	-0.0578738	-0.0638507
Ap2a2:ENSMUST00000003038.11	0.0984826	0.0672264	0.0584629	-0.0534383	-0.0500519	-0.0816176	0.0777409	-0.0747178	0.0664102	-0.0667129	-0.0477013	-0.0828941	-0.093409	-0.0796478	-0.0851741	-0.0633433	-0.0664558	-0.0689531	-0.0581737	-0.0891209	-0.0647496	-0.0833607	-0.0873256	0.071657	0.0828618	-0.0956246	-0.0512544	-0.0869242	0.0550468	-0.0436013	-0.0542941	-0.0745699	-0.076122	-0.0547236	-0.0427006
2410004B18Rik:ENSMUST00000039571.13	0.0800071	0.0478787	0.0601598	-0.052315	-0.0569574	-0.0710678	0.0736097	-0.0395337	0.06609	-0.0595781	-0.0563269	-0.0628643	-0.0725788	-0.0610081	-0.0497211	-0.0481249	-0.0462404	-0.0583497	-0.0618037	-0.0758847	-0.0568716	-0.0570608	-0.0674165	0.0647204	0.0667811	-0.067853	-0.042969	-0.0671878	0.0578057	-0.0460765	-0.0469501	-0.0634428	-0.0564055	-0.0517342	-0.056952
Nfyb:ENSMUST00000130911.7	0.0809888	0.0446721	0.0584003	-0.0544289	-0.0420918	-0.0609771	0.0664402	-0.0304398	0.0556558	-0.0437655	-0.0351041	-0.0616519	-0.0496469	-0.0566526	-0.0426296	-0.0501221	-0.0409443	-0.0569105	-0.0583176	-0.0547879	-0.0486834	-0.0537784	-0.0656789	0.0669536	0.0607047	-0.0514111	-0.0400738	-0.059994	0.0532183	-0.0360686	-0.0380162	-0.0508942	-0.0538979	-0.0264918	-0.0468759
Rpl22:ENSMUST00000139685.7	0.164765	0.119733	0.116731	-0.131154	-0.0890453	-0.131596	0.161557	-0.10842	0.126292	-0.108448	-0.0799725	-0.125199	-0.138522	-0.125191	-0.108853	-0.0990462	-0.0729344	-0.124499	-0.0875814	-0.137419	-0.122721	-0.109749	-0.178728	0.152715	0.150282	-0.113923	-0.100049	-0.147762	0.0945732	-0.104435	-0.118553	-0.133632	-0.133883	-0.107123	-0.0995954
Grpel2:ENSMUST00000238010.1	0.0509958	0.037532	0.0324021	-0.0466919	-0.0327264	-0.0426071	0.039499	-0.0475117	0.0334141	-0.0282323	-0.0435621	-0.0437798	-0.0461109	-0.0388047	-0.0301727	-0.0404732	-0.0276802	-0.0443108	-0.0398027	-0.0476166	-0.0432329	-0.0308187	-0.0572685	0.039611	0.0464875	-0.0412275	-0.0284111	-0.0387066	0.0364617	-0.024407	-0.0332229	-0.0513432	-0.0479362	-0.0276925	-0.0414518
St13:ENSMUST00000172107.7	0.0920763	0.0787729	0.0703341	-0.0731882	-0.0424127	-0.0801549	0.0981371	-0.0509322	0.0771962	-0.0576538	-0.0632007	-0.0705219	-0.0654497	-0.080329	-0.0591853	-0.0391484	-0.0495708	-0.0563775	-0.0410443	-0.0770822	-0.0729648	-0.0726341	-0.0866311	0.0861975	0.080424	-0.0693177	-0.048465	-0.0754783	0.0761908	-0.0610448	-0.0593016	-0.0623774	-0.0608584	-0.0553144	-0.0603607
Mob4:ENSMUST00000162364.7	0.0966952	0.0803508	0.0796405	-0.0842323	-0.0559969	-0.0879959	0.096318	-0.0419168	0.0887038	-0.0754536	-0.0535981	-0.0853958	-0.0894177	-0.0850313	-0.0671221	-0.0660089	-0.0488471	-0.0727068	-0.0611845	-0.0753504	-0.0798565	-0.0726145	-0.0970105	0.0946898	0.0890945	-0.0692273	-0.051558	-0.0827309	0.0884014	-0.0661448	-0.0649356	-0.0780038	-0.0856822	-0.0611267	-0.0755398
Erich1:ENSMUST00000110813.4	0.110168	0.0970324	0.0730866	-0.0814815	-0.0575853	-0.0778204	0.0893223	-0.0651079	0.0839075	-0.0815736	-0.040707	-0.0971016	-0.102278	-0.101822	-0.057153	-0.0573396	-0.0533691	-0.0730003	-0.0491428	-0.0841436	-0.0773266	-0.0708896	-0.0874723	0.0746854	0.0962467	-0.0687593	-0.0383708	-0.0944451	0.0743344	-0.0547564	-0.0669602	-0.0750827	-0.0717569	-0.0587187	-0.0651965
Cdc42:ENSMUST00000030417.9	0.0670092	0.056829	0.0492672	-0.0350596	-0.029133	-0.0508895	0.0659495	-0.0302211	0.0442851	-0.0450821	-0.0193088	-0.0612033	-0.061484	-0.0442373	-0.0538087	-0.0591448	-0.0219952	-0.0419136	-0.0288919	-0.0474422	-0.0509703	-0.0503651	-0.0688836	0.0710898	0.0627641	-0.0323994	-0.0317177	-0.0502073	0.0422706	-0.0514755	-0.0369351	-0.0476843	-0.0471001	-0.0367169	-0.0465727
Cacybp:ENSMUST00000014370.10	0.0846759	0.0699756	0.066989	-0.0668836	-0.0461723	-0.0705239	0.0879479	-0.0548181	0.0760189	-0.0575405	-0.0686849	-0.0624778	-0.0822029	-0.0670511	-0.0607542	-0.0505505	-0.0472386	-0.0604637	-0.0394499	-0.0754098	-0.0700116	-0.0604406	-0.0832394	0.0724313	0.0841445	-0.0640054	-0.048464	-0.0636775	0.0833088	-0.0530412	-0.0592964	-0.0593187	-0.0627299	-0.0507055	-0.0602167
Chmp3:ENSMUST00000059462.11	0.0904561	0.0512595	0.0583851	-0.0640914	-0.049268	-0.078634	0.0743462	-0.0557682	0.0765843	-0.0580151	-0.0574955	-0.0592269	-0.0634898	-0.0648386	-0.0562749	-0.0463864	-0.0558692	-0.0611662	-0.0515244	-0.0709658	-0.0837126	-0.0677841	-0.0799213	0.065966	0.0756144	-0.0686786	-0.048106	-0.0650272	0.0526566	-0.0484294	-0.0431972	-0.0614064	-0.0433969	-0.0626281	-0.0592343
Zfp706:ENSMUST00000078976.8	0.0704605	0.0815027	0.0650431	-0.0652755	-0.0418456	-0.0650946	0.078429	-0.0302722	0.0720404	-0.052046	-0.0385722	-0.068691	-0.0626385	-0.0637566	-0.0490203	-0.0360858	-0.0410476	-0.0584228	-0.0393046	-0.0638359	-0.0657181	-0.0592407	-0.0836896	0.0631071	0.0797674	-0.0583699	-0.0460604	-0.0695514	0.0753598	-0.0632319	-0.0482729	-0.0518644	-0.0661364	-0.045562	-0.0549763
Anp32a:ENSMUST00000085519.12	0.0659491	0.0743028	0.0482889	-0.0506897	-0.0268964	-0.053617	0.0608587	-0.0401343	0.0498493	-0.043695	-0.060398	-0.0585182	-0.0688315	-0.0473357	-0.0455555	-0.0340755	-0.0309461	-0.0445146	-0.0230896	-0.0611758	-0.0697147	-0.0489838	-0.0622079	0.0458534	0.0547057	-0.0384097	-0.0290108	-0.0562676	0.0729127	-0.032565	-0.0411545	-0.0401968	-0.0454547	-0.0372804	-0.0369316
Brwd1:ENSMUST00000113827.3	0.0415696	0.0651302	0.0458584	-0.0448237	-0.0236002	-0.0426763	0.0660881	-0.023049	0.0423504	-0.0371132	-0.0313108	-0.0449433	-0.047025	-0.0454813	-0.0378949	-0.0317601	-0.0202434	-0.0411291	-0.0284948	-0.0380507	-0.0473682	-0.0334172	-0.0501217	0.047025	0.0577323	-0.0425701	-0.0349338	-0.0574947	0.0645175	-0.0447499	-0.0313105	-0.0194327	-0.0411749	-0.0403031	-0.0415171
Bet1:ENSMUST00000049166.4	0.0667743	0.05316	0.0404125	-0.0443044	-0.0219607	-0.0362138	0.0677807	-0.0454265	0.0384197	-0.0288438	-0.0138016	-0.0369346	-0.0519964	-0.0364269	-0.0335918	-0.0198158	-0.0183763	-0.0449474	-0.0477294	-0.0466937	-0.0465396	-0.0361022	-0.0591336	0.05738	0.0488314	-0.0339366	-0.0333044	-0.0489772	0.0481903	-0.0172966	-0.0463838	-0.0298744	-0.0311626	-0.0498376	-0.0241352
Srp9:ENSMUST00000027792.5	0.0839536	0.109569	0.0944354	-0.0794678	-0.0535219	-0.0945852	0.0940922	-0.06552	0.0975721	-0.0648172	-0.0682309	-0.0708966	-0.0822668	-0.0834396	-0.0606482	-0.0472611	-0.0635314	-0.0752307	-0.0577326	-0.101244	-0.0793351	-0.0668818	-0.106553	0.0562141	0.117243	-0.0784816	-0.0581672	-0.0945719	0.0883141	-0.08387	-0.0687749	-0.0617858	-0.0686252	-0.0681641	-0.0726475
Chmp4b:ENSMUST00000044277.9	0.050752	0.0449943	0.0315543	-0.0252948	-0.00341484	-0.034944	0.0578723	-0.0172505	0.0352506	-0.0309798	-0.0175194	-0.0338085	-0.0228133	-0.0307741	-0.0332314	-0.0161081	-0.0222664	-0.0291804	-0.0131582	-0.00881598	-0.0450335	-0.0254679	-0.0414431	0.055046	0.0426487	-0.0371284	-0.0300416	-0.0389952	0.046853	-0.0434261	-0.0225306	-0.0198941	-0.0205732	-0.0303118	-0.0191035
Zmat2:ENSMUST00000001419.9	0.0389699	0.0432745	0.0403604	-0.0226373	-0.0123374	-0.0322745	0.0694259	-0.00881723	0.0368668	-0.0350923	0.0133396	-0.0616356	-0.031015	-0.0379491	-0.0310624	-0.00898133	-0.0118994	-0.0296031	-0.0198455	-0.0316809	-0.0421931	-0.0306774	-0.040001	0.0546489	0.0479834	-0.0329795	-0.0069541	-0.0437314	0.0368503	-0.0517635	-0.0238329	-0.0257081	-0.0274786	-0.0323192	-0.0308178
Pum3:ENSMUST00000076219.5	0.0772819	0.0501667	0.0380697	-0.0629281	-0.0356635	-0.0616038	0.0628751	-0.05037	0.0579188	-0.0542206	-0.0403961	-0.0694725	-0.0701607	-0.060309	-0.0525037	-0.0506256	-0.0361635	-0.049009	-0.036933	-0.064174	-0.0620202	-0.0557259	-0.0657347	0.0500633	0.0671744	-0.0414671	-0.0532007	-0.0625884	0.0564803	-0.0500324	-0.0459297	-0.0629904	-0.0640768	-0.0377351	-0.0316961
Vps4a:ENSMUST00000034388.9	0.058753	0.0391128	0.0318149	-0.0413295	-0.020194	-0.0362992	0.0603108	-0.0293194	0.0460974	-0.040628	-0.0234851	-0.0495577	-0.0491897	-0.0428005	-0.0459909	-0.0422035	-0.01194	-0.0236552	-0.0147434	-0.0366306	-0.0320277	-0.0299154	-0.0350118	0.0459682	0.0498111	-0.0361412	-0.0210695	-0.0341009	0.0627097	-0.0392549	-0.0193055	-0.0263316	-0.0316176	-0.0306285	-0.0190755
Scarb2:ENSMUST00000031377.8	0.0799571	0.0747673	0.0655473	-0.0742531	-0.0372652	-0.0596119	0.0739277	-0.0313	0.0706347	-0.0524482	-0.0602861	-0.0812004	-0.0957948	-0.0712831	-0.060058	-0.06149	-0.0507174	-0.0590153	-0.0334998	-0.0709596	-0.0688822	-0.0645339	-0.0666596	0.0778749	0.0661439	-0.0469323	-0.0433862	-0.0714875	0.0863107	-0.0238752	-0.0468916	-0.0581795	-0.0754975	-0.0384215	-0.0453576
Ubfd1:ENSMUST00000033158.5	0.0459759	0.0486495	0.0273464	-0.042123	-0.0363682	-0.0395157	0.0412375	-0.0454019	0.0409361	-0.0358973	-0.0458492	-0.0294272	-0.054426	-0.0377817	-0.0478183	-0.0193774	-0.026546	-0.0215396	-0.0317966	-0.049592	-0.0386439	-0.020376	-0.0592538	0.0387626	0.050345	-0.0259998	-0.029176	-0.0369744	0.0314195	-0.0126357	-0.0357553	-0.0552823	-0.0396345	-0.0170895	-0.0230821
Elf2:ENSMUST00000194641.5	0.060598	0.0361867	0.0549848	-0.0435144	-0.0214811	-0.0481101	0.0499487	-0.0173408	0.0551932	-0.0367388	-0.0342715	-0.0419096	-0.0434584	-0.0378049	-0.0301644	-0.0387435	-0.0207266	-0.0367926	-0.0301507	-0.0544629	-0.0469778	-0.0338116	-0.0425642	0.0592394	0.0488616	-0.0298824	-0.0146119	-0.0306101	0.0278581	-0.0447977	-0.0337487	-0.0396368	-0.0477006	-0.0380331	-0.0298861
Ndufaf4:ENSMUST00000029925.9	0.0648585	0.0592062	0.05021	-0.060177	-0.0418233	-0.055066	0.0623806	-0.046568	0.0803199	-0.0470719	-0.0749036	-0.0618003	-0.0651057	-0.050674	-0.0513963	-0.0317243	-0.034962	-0.051278	-0.0249917	-0.0616932	-0.0601826	-0.054044	-0.0717923	0.0665654	0.0750592	-0.0614832	-0.0325454	-0.0602752	0.0806709	-0.0672903	-0.0536096	-0.0416663	-0.048656	-0.0461264	-0.05524
Rab7:ENSMUST00000113600.9	0.0732439	0.0638152	0.0612112	-0.0596598	-0.0383222	-0.0742046	0.0772355	-0.0387142	0.0738029	-0.0549698	-0.0498935	-0.0702033	-0.0630225	-0.0516192	-0.0448966	-0.0454195	-0.0348265	-0.0604559	-0.0375987	-0.0635516	-0.0683556	-0.0623244	-0.0768812	0.0706648	0.083736	-0.0589563	-0.0347552	-0.0649301	0.0692713	-0.0606016	-0.0412819	-0.051725	-0.0637569	-0.0549247	-0.0559419
Id4:ENSMUST00000021810.2	0.0222309	0.0252666	0.0267425	-0.0377958	-0.0175659	-0.0321611	0.0349406	-0.00160553	0.040796	-0.0279222	-0.0522749	-0.00680216	-0.0314616	-0.0276956	-0.00979279	-0.00672649	-0.0300938	-0.011231	-0.0392184	-0.0068736	-0.0207963	-0.0326762	-0.0230172	0.0320064	0.0332616	-0.0214416	-0.0204547	-0.0234812	0.034701	-0.0191677	-0.0213045	-0.0100636	-0.00904014	-0.0203747	-0.0226683
Ergic1:ENSMUST00000167662.7	0.0427434	0.0266416	0.0115294	-0.0219205	-0.0148695	-0.0280344	0.0331075	-0.0335474	0.01164	-0.0319723	-0.0136715	-0.0274345	-0.0511973	-0.0254777	-0.0209748	-0.0242275	-0.0209289	-0.0229835	-0.0108372	-0.0356224	-0.0347768	-0.0361551	-0.0369878	0.0406667	0.0272428	-0.0132734	-0.026404	-0.04138	0.0142854	-0.00332686	-0.0302487	-0.0328276	-0.033023	-0.0262951	-0.0117027
Cdk17:ENSMUST00000069965.8	0.0392083	0.0428827	0.0236504	-0.0221137	-0.000189487	-0.0429756	0.0401318	-0.00814671	0.0309582	0.000885611	-0.0298873	-0.0239986	-0.0372786	-0.0356414	-0.0223134	-0.00930493	-0.0102094	-0.0259187	-0.0168676	-0.0253414	-0.058261	-0.0242508	-0.0352633	0.0245723	0.0315885	0.00045952	-0.00556497	-0.0402016	0.0249001	-0.00868274	-0.0165761	-0.023436	-0.0233814	-0.0234774	-0.0299321
Cwc15:ENSMUST00000004200.8	0.0905548	0.0387955	0.0747252	-0.0967613	-0.0870982	-0.0810727	0.0667107	-0.115747	0.0644076	-0.037512	-0.0508507	-0.109613	-0.0774269	-0.107447	-0.151618	-0.11446	-0.046273	-0.0944734	-0.122167	-0.146694	-0.0656675	-0.0749425	-0.108626	0.0877401	0.0715597	-0.111814	-0.0977684	-0.0886634	0.0572816	-0.0643379	-0.0907636	-0.0944457	-0.119071	-0.0923924	-0.0914746
Macroh2a1:ENSMUST00000016081.12	0.0597494	0.0216732	0.049965	-0.0458188	-0.0688086	-0.047688	0.0419363	-0.0389042	0.0423527	-0.028631	-0.0073546	-0.0596285	-0.0598227	-0.0516409	-0.0700555	-0.0471942	-0.0374169	-0.0475416	-0.0673585	-0.0697399	-0.0370175	-0.0485794	-0.0595201	0.0329431	0.0435264	-0.0541085	-0.036021	-0.0462589	0.0111639	-0.0392622	-0.0571007	-0.0555834	-0.0449655	-0.0468176	-0.0496137
Pdk3:ENSMUST00000045748.6	0.0854625	0.039942	0.0656531	-0.0639432	-0.0665244	-0.0466576	0.0576461	-0.039692	0.0463187	-0.0357177	-0.0268287	-0.0591046	-0.0431541	-0.0445636	-0.076893	-0.0459146	-0.0114379	-0.0602095	-0.0602618	-0.0594563	-0.044658	-0.0362143	-0.069475	0.0332958	0.0408719	-0.056223	-0.053484	-0.055174	0.0405977	-0.062253	-0.0559272	-0.053635	-0.0442347	-0.0663996	-0.051567
Sh3glb2:ENSMUST00000100215.10	0.100969	0.0726465	0.0898494	-0.103671	-0.0995322	-0.0862249	0.0743194	-0.0906221	0.0923128	-0.0704979	-0.104841	-0.110917	-0.101978	-0.109478	-0.122949	-0.0913261	-0.0510743	-0.0908576	-0.10672	-0.131175	-0.0732107	-0.0961582	-0.119951	0.0684511	0.0809056	-0.104974	-0.0663954	-0.0871972	0.116293	-0.0849831	-0.0910277	-0.0998154	-0.0997382	-0.0933872	-0.0876202
Tmsb15l:ENSMUST00000127404.7	0.0457968	0.0153223	0.0288138	-0.0516265	-0.0691117	-0.0447079	0.0524106	-0.049243	0.0582034	-0.0282404	-0.0669947	-0.0272526	-0.0207599	-0.0627574	-0.079968	-0.0521513	-0.0146238	-0.0624392	-0.0907354	-0.0999498	-0.0304355	-0.0569538	-0.0686359	0.00965481	0.0413325	-0.0594685	-0.052802	-0.0404369	0.0991901	-0.0412942	-0.0358644	-0.0517	-0.0533355	-0.0457341	-0.0703344
Rpf2:ENSMUST00000045114.12	0.109777	0.0449258	0.0788009	-0.0980453	-0.0987903	-0.0844645	0.0769841	0.052843	0.104229	-0.0552288	-0.0994331	-0.07122	-0.0591093	-0.0918584	-0.095612	-0.0530851	-0.0657865	-0.0900899	-0.101231	0.0133087	-0.0558832	-0.0745243	-0.099412	0.0611071	0.085285	-0.0907246	-0.077244	-0.0704008	0.0871939	-0.0868631	-0.0844664	-0.0689493	-0.0843936	-0.0854419	-0.0977643
Gsto1:ENSMUST00000026050.7	0.0872047	0.0738812	0.077198	-0.0859666	-0.0925401	-0.0923063	0.0653666	-0.0613819	0.103903	-0.0664132	-0.0800533	-0.0692939	-0.0874356	-0.0866316	-0.0838122	-0.0573904	-0.0766416	-0.0911691	-0.0804232	-0.110565	-0.0447039	-0.0686537	-0.0929744	0.0482156	0.0979007	-0.0912297	-0.0652888	-0.0694037	0.0906863	-0.0438836	-0.0794849	-0.0786569	-0.0781401	-0.0639255	-0.0688919
Rexo1:ENSMUST00000057910.15	0.111845	0.0705806	0.0921083	-0.113653	-0.0882483	-0.10357	0.105205	-0.0835958	0.116787	-0.0670624	-0.109295	-0.085288	-0.127642	-0.119911	-0.102997	-0.0898812	-0.0728285	-0.0975063	-0.107972	-0.131953	-0.0812357	-0.0954095	-0.105448	0.101731	0.117598	-0.0920955	-0.0933577	-0.0901864	0.0817872	-0.0901401	-0.0966377	-0.0825647	-0.08144	-0.0822335	-0.106158
Rpl27a:ENSMUST00000143107.1	0.10312	0.0336464	0.074354	-0.0607119	-0.0502836	-0.0758828	0.0592101	-0.0319895	0.0922265	-0.061712	-0.104936	-0.0442225	-0.0769532	-0.0658203	-0.0431216	-0.0511836	-0.0459199	-0.0673345	-0.0293826	-0.0377429	-0.058175	-0.0555856	-0.0966898	0.0715267	0.0755562	-0.0481743	-0.0530882	-0.0659956	0.0901376	-0.0603814	-0.0546982	-0.048784	-0.0704484	-0.0577274	-0.077036
Ufm1:ENSMUST00000146598.7	0.102024	0.0766598	0.0896624	-0.0860183	-0.0786352	-0.104316	0.0949217	-0.0868981	0.0952272	-0.0728288	-0.0733578	-0.0630524	-0.0927278	-0.0851724	-0.0800805	-0.069875	-0.0574106	-0.0802684	-0.0822063	-0.106438	-0.0686956	-0.0760173	-0.115206	0.0675131	0.0999702	-0.072826	-0.0766827	-0.0885322	0.0692636	-0.0733937	-0.0803254	-0.0762148	-0.0718885	-0.0735464	-0.0830568
Ranbp1:ENSMUST00000115645.9	0.131366	0.130157	0.136321	-0.155467	-0.139138	-0.1633	0.100816	-0.176997	0.155778	-0.0894916	-0.175074	-0.122886	-0.133243	-0.160946	-0.148424	-0.151829	-0.123385	-0.146308	-0.156742	-0.198405	-0.106491	-0.123252	-0.172975	0.0797628	0.138551	-0.140206	-0.142038	-0.142708	0.141086	-0.102893	-0.140629	-0.137257	-0.137226	-0.120465	-0.14951
Tbc1d19:ENSMUST00000037337.9	0.103368	0.102163	0.0770073	-0.118891	-0.0711589	-0.119401	0.0664937	-0.138436	0.117879	-0.081398	-0.123808	-0.0890166	-0.117829	-0.0852162	-0.0938546	-0.0923159	-0.102125	-0.101769	-0.0760423	-0.14663	-0.10285	-0.0956761	-0.119777	0.0775905	0.113823	-0.0959757	-0.0863275	-0.114641	0.0589822	-0.0902534	-0.0820102	-0.0744917	-0.103377	-0.0927336	-0.107997
Psma3:ENSMUST00000160027.7	0.083666	0.0579275	0.0490675	-0.0947717	-0.0643154	-0.0828697	0.0422198	-0.191082	0.0919811	-0.0608836	-0.083777	-0.0489399	-0.0715621	-0.100582	-0.0841293	-0.0616281	-0.0623047	-0.0824206	-0.0482148	-0.164848	-0.077167	-0.0735193	-0.0902658	0.0572925	0.0629996	-0.0770085	-0.0725163	-0.0783101	0.0678403	-0.0631171	-0.0812874	-0.0758979	-0.102629	-0.0594816	-0.0860431
Dazap1:ENSMUST00000105362.7	0.11398	0.115181	0.112461	-0.0896289	-0.0888261	-0.123749	0.111075	-0.09907	0.122197	-0.0840788	-0.10611	-0.103042	-0.099528	-0.104014	-0.0986583	-0.0830067	-0.0878433	-0.0961056	-0.0969624	-0.123321	-0.101285	-0.0946619	-0.13403	0.0913319	0.122689	-0.0971859	-0.0914458	-0.113415	0.0986123	-0.102006	-0.0842848	-0.0906767	-0.100874	-0.0845449	-0.113761
Mettl6:ENSMUST00000055303.4	0.100041	0.0878098	0.0854448	-0.0951653	-0.0882598	-0.102287	0.0871673	-0.0760722	0.0923433	-0.076485	-0.0992192	-0.0879871	-0.0755072	-0.0791632	-0.111566	-0.0522497	-0.0747678	-0.0848096	-0.106664	-0.102004	-0.0795716	-0.0716689	-0.10799	0.0788234	0.102305	-0.0888935	-0.0823965	-0.0888521	0.0977696	-0.0989925	-0.073729	-0.0878781	-0.112456	-0.0590685	-0.109269
Arl16:ENSMUST00000076921.6	0.0837876	0.0476306	0.0626182	-0.0552607	-0.0322231	-0.063085	0.0744685	-0.0804842	0.0579177	-0.040291	-0.0635932	-0.0722063	-0.0549649	-0.0438814	-0.0686524	-0.0575496	-0.0387944	-0.0594025	-0.0285763	-0.0766941	-0.0668796	-0.0490727	-0.088042	0.0677627	0.0757446	-0.0447841	-0.0622442	-0.0790118	0.0364857	-0.0689935	-0.0485582	-0.0634	-0.0604085	-0.0533242	-0.0743587
Phax:ENSMUST00000008445.6	0.0557359	0.0516872	0.0534169	-0.0278104	-0.0197293	-0.0485444	0.0707024	-0.0326968	0.0430085	-0.0306821	-0.000933454	-0.064716	-0.0452807	-0.0422337	-0.0492011	-0.0442826	-0.012942	-0.0352566	-0.0308402	-0.0474495	-0.0605571	-0.0449135	-0.0537288	0.0633388	0.0520425	-0.0409821	-0.0292183	-0.0491784	0.00522402	-0.0682289	-0.042222	-0.040577	-0.0352344	-0.0337332	-0.0419619
Ubxn7:ENSMUST00000115151.4	0.0641987	0.0406347	0.0564195	-0.064728	-0.0282898	-0.0611757	0.040203	-0.0522429	0.0819273	-0.0449253	-0.0686409	-0.0360475	-0.0578382	-0.0515476	-0.0232234	-0.0436071	-0.0471264	-0.0470316	-0.0262402	-0.0636694	-0.0479739	-0.0382522	-0.0571901	0.0717201	0.0529322	-0.0179225	-0.0279504	-0.0479093	0.0320418	-0.055398	-0.044148	-0.027267	-0.0498779	-0.057003	-0.0305202
Prkar2b:ENSMUST00000036497.15	0.0778738	0.0662843	0.056367	-0.0560625	-0.0643225	-0.0569229	0.0714041	-0.0419291	0.0720095	-0.0633196	-0.0509387	-0.0650859	-0.0550508	-0.0619182	-0.065245	-0.0436643	-0.0253477	-0.0464889	-0.0535926	-0.0656886	-0.0680049	-0.0615736	-0.0707079	0.0592413	0.0739752	-0.0616614	-0.0420082	-0.0732968	0.038987	-0.0655243	-0.051475	-0.058657	-0.0589655	-0.0584101	-0.0661209
Hmgcr:ENSMUST00000022176.14	0.0930945	0.0671182	0.0526791	-0.088666	-0.0387845	-0.092262	0.0553491	-0.0824312	0.0835225	-0.0752098	-0.0831019	-0.0900802	-0.0901493	-0.0732625	-0.0509444	-0.0605427	-0.0712583	-0.062431	-0.0659992	-0.0781863	-0.0858098	-0.0613444	-0.10641	0.0629494	0.072915	-0.0663664	-0.0700797	-0.0905089	0.086633	-0.0704239	-0.0715069	-0.0604054	-0.0834236	-0.0853661	-0.0828097
Uri1:ENSMUST00000085513.5	0.0737014	0.0568963	0.0489631	-0.0813144	-0.0437069	-0.0562285	0.0745651	-0.0548179	0.0584856	-0.056601	-0.0728369	-0.0680701	-0.0585036	-0.0630006	-0.069165	-0.0242525	-0.0477743	-0.0588763	-0.0596882	-0.0736479	-0.0542306	-0.0629352	-0.0728019	0.0533989	0.0652247	-0.0629611	-0.0663563	-0.0660726	0.0616796	-0.0381323	-0.0555956	-0.0568726	-0.059881	-0.0407664	-0.0395214
Actr10:ENSMUST00000021479.5	0.0821886	0.0639736	0.0642911	-0.0449669	-0.0160885	-0.0491693	0.035467	-0.0706104	0.0687188	-0.0553626	-0.0803469	-0.0282315	-0.0971296	-0.0308949	-0.0122043	-0.00734246	-0.0445869	-0.0354006	0.0629806	-0.0405183	-0.0644169	-0.0316348	-0.0780801	0.0661618	0.0774815	-0.0155465	-0.0284298	-0.0490178	0.0333333	-0.0665383	-0.0380308	-0.0231771	-0.0467093	-0.054457	-0.0620162
Dpm1:ENSMUST00000154111.7	0.0764338	0.0436904	0.0654215	-0.0407823	-0.0441139	-0.0360346	0.0678836	-0.0646389	0.0620875	-0.0212707	-0.0350291	-0.046644	-0.0163755	-0.0404588	-0.0453251	-0.00777376	-0.0279276	-0.044082	-0.0561413	-0.0708618	-0.0376859	-0.0329358	-0.0419763	0.0287079	0.057586	-0.0482501	-0.0402925	-0.0623913	0.0502952	-0.0882622	-0.053104	-0.0323889	-0.0419844	-0.0489975	-0.0674214
Ugp2:ENSMUST00000102875.10	0.0380909	0.0407587	0.0349849	-0.0218887	-0.00516869	-0.0362083	0.0344686	-0.0234887	0.0461127	-0.0443961	-0.0255325	-0.0094611	-0.0390613	-0.0168858	0.000858491	-0.0164822	-0.0413598	-0.0267666	0.0054119	-0.0267121	-0.0539647	-0.0193894	-0.0502237	0.0305839	0.0511675	-0.00883858	-0.0173642	-0.0295789	0.0302704	-0.0495183	-0.00924129	-0.0139427	-0.00941369	-0.013377	-0.0424452
Ppp2cb:ENSMUST00000009774.10	0.0716652	0.0453699	0.0475478	-0.0271228	0.0116075	-0.0235888	0.0374385	-0.0118963	0.0482984	-0.0485844	-0.0460071	-0.00261801	-0.0483198	-0.00368416	0.00545612	0.00745809	-0.0220045	-0.0207078	0.0692999	0.00626869	-0.037921	-0.0292732	-0.058219	0.0673913	0.0660646	-0.0191655	-0.0225116	-0.0286726	0.0596885	-0.0761675	-0.0121249	-0.00379287	-0.0289421	-0.00725311	-0.0583164
Khdrbs3:ENSMUST00000022954.6	0.038227	0.0392456	0.0389222	-0.0338659	-0.0183831	-0.0294062	0.0424147	-0.0290313	0.0294765	-0.0424924	-0.0176126	-0.0249749	-0.0302174	-0.0280374	-0.0324782	-0.0273408	-0.020993	-0.0195118	-0.00155448	-0.0140858	-0.0529713	-0.030306	-0.0352757	0.0332872	0.0342664	-0.0224282	-0.015054	-0.0208911	0.0204928	-0.0625051	-0.0249833	-0.0107555	-0.0139245	-0.0205433	-0.0376398
Aif1l:ENSMUST00000001920.12	-0.0209374	-0.0218225	-0.0425676	0.0206848	0.0301603	0.0353725	0.00126356	0.0342932	-0.0348283	0.0102207	0.0262727	-0.0277884	-0.0070552	0.0230324	0.0107974	0.0089433	0.0254782	-0.00392891	0.0122069	0.00546408	-0.010667	0.00840208	0.0257117	0.00092645	-0.0223514	0.0181437	0.00608433	0.00433236	-0.0114704	0.0367882	0.0281613	-0.00940455	0.0308056	0.0179517	0.0422761
Zmym5:ENSMUST00000039812.15	0.0111367	0.00594695	0.00447434	-0.0228891	-0.00417143	-0.00788762	0.0163521	-0.00595604	-0.000358153	0.00398218	-0.0132904	-0.0190914	-0.016799	-0.0160594	-0.0198528	-0.0116225	0.000701595	-0.0101513	-0.0254443	-0.0048564	-0.0162521	-0.0118032	-0.00740014	-0.00917706	0.000333363	-0.00403649	-0.00151272	-0.000695504	0.0134944	0.0274086	0.0149457	-0.0107721	0.00528835	0.00135646	-0.010447
Vamp2:ENSMUST00000117780.1	0.0571801	0.0183374	0.0404923	-0.0179686	-1.75807e-05	-0.0209976	0.0631428	-0.00931434	0.0237965	-0.0256352	0.0111707	-0.0438836	-0.0562114	-0.0161487	-0.0366504	-0.0466037	0.00778592	-0.0073502	0.000573762	-0.0158283	-0.0398903	-0.0305099	-0.0292983	0.0587969	0.0340696	-0.00580329	-0.0100648	-0.0338646	0.0226896	-0.0218223	-0.0251118	-0.0383749	-0.0324624	-0.0230328	-0.00887306
Rala:ENSMUST00000009003.8	0.0503347	0.0184736	0.011108	-0.00942956	0.000173918	-0.0179388	0.0526426	-0.00686951	0.00752556	-0.0288124	0.0171788	-0.0563085	-0.048581	-0.0241981	-0.0365554	-0.0150151	0.0058072	-0.022429	-0.00555024	-0.0300821	-0.0417539	-0.0220704	-0.0391342	0.0603259	0.0359473	-0.0247454	-0.00495016	-0.0300868	0.028059	-0.0260805	-0.0182393	-0.0410966	-0.0332026	-0.0111705	-0.00602511
Ccdc47:ENSMUST00000002043.9	0.0360467	0.0377905	0.0331583	-0.0287888	-0.024841	-0.0316544	0.0446412	-0.0101722	0.0193335	-0.0288143	-0.0153401	-0.0501827	-0.041266	-0.0294442	-0.0360102	-0.0174871	-0.0114817	-0.0230612	-0.0274324	-0.0286473	-0.0308523	-0.0330647	-0.0413269	0.0457577	0.0328666	-0.0237465	-0.0173268	-0.0264864	0.0219026	-0.0169743	-0.0284687	-0.0360065	-0.0266581	-0.0359475	-0.0118066
Rfxap:ENSMUST00000044373.5	0.11235	0.0787065	0.0784379	-0.0746403	-0.0461989	-0.0680758	0.106132	-0.0261366	0.0762674	-0.0618682	-0.0372495	-0.121421	-0.0952148	-0.0799076	-0.079839	-0.0682522	-0.027127	-0.0848492	-0.0434134	-0.0726011	-0.0850821	-0.0683179	-0.0944137	0.101437	0.0734962	-0.0608857	-0.0452415	-0.0946477	0.0776524	-0.0498023	-0.0709493	-0.0702703	-0.0624324	-0.0750619	-0.057656
Pdhx:ENSMUST00000011058.8	0.0978346	0.0830656	0.0753297	-0.0775477	-0.0579307	-0.0752384	0.0925366	-0.0650344	0.0756351	-0.0697847	-0.0627648	-0.0815843	-0.0922799	-0.0859125	-0.0806217	-0.0949522	-0.0657308	-0.0650021	-0.0593086	-0.095519	-0.07999	-0.0730167	-0.0956933	0.083275	0.0838826	-0.0708806	-0.0596841	-0.0922827	0.0745414	-0.0533001	-0.0627185	-0.0721198	-0.0615925	-0.0681111	-0.0574949
Rhoa:ENSMUST00000007959.13	0.0621992	0.0665759	0.060579	-0.0535775	-0.0298768	-0.0605795	0.0789157	-0.0382833	0.0607153	-0.0459781	-0.0572478	-0.044627	-0.0589788	-0.0556053	-0.0419067	-0.0344174	-0.0459186	-0.043588	-0.0409375	-0.0582737	-0.0474827	-0.0561974	-0.058873	0.0702994	0.0765277	-0.0607343	-0.041971	-0.0516313	0.0545299	-0.0387276	-0.0547072	-0.0472207	-0.0319553	-0.0325097	-0.0426137
Pccb:ENSMUST00000149322.7	0.0647997	0.05395	0.0334689	-0.0415655	-0.0279505	-0.0473373	0.0651155	-0.0455698	0.0512422	-0.0507242	-0.0274564	-0.0472911	-0.0624036	-0.0472948	-0.0443699	-0.0380417	-0.0305905	-0.0370298	-0.0346111	-0.0781793	-0.0417094	-0.0622881	-0.0527843	0.0607015	0.0667116	-0.0571104	-0.0422736	-0.0552998	0.0458278	-0.0282829	-0.0560854	-0.0637211	-0.0370239	-0.0282239	-0.0499281
Rer1:ENSMUST00000030914.3	-0.0108407	-0.023075	-0.0181047	0.01825	0.0130955	0.0225396	0.00124465	0.016975	-0.0226038	0.0116827	0.0188373	0.00882828	0.0333367	0.00690849	0.00764369	0.0354455	0.017187	0.00652465	0.0086791	0.0108209	0.00947357	0.0148004	0.0117868	-0.0114689	-0.00402177	0.00644974	0.0176776	0.0113898	0.0223591	-0.0039128	0.0139565	0.00955964	0.00901706	0.00795056	0.0189799
Cemip2:ENSMUST00000025663.7	-0.0408154	-0.0479118	-0.0436507	0.0704468	0.0526963	0.0572853	-0.0328729	0.0478848	-0.0588542	0.0170863	0.0597043	0.0508369	0.0550111	0.0611183	0.0471389	0.0203991	0.057226	0.0515362	0.0362938	0.0676238	0.0311776	0.066723	0.0668269	-0.0306436	-0.0566639	0.0623681	0.0223419	0.0770655	-0.0430888	0.0418533	0.0417119	0.0376907	0.0722644	0.040531	0.0472008
Kras:ENSMUST00000111710.7	0.0119231	0.017947	0.0222643	0.00465381	0.00133753	-0.00274372	0.0227734	0.0108721	0.0117264	0.000290587	-0.000755104	-0.0174931	-0.0039153	-0.00753987	-0.0128012	-0.000208769	0.00721061	-0.00192912	-0.00891107	-0.013548	-0.0113089	-0.00521359	-0.00831562	0.0203152	0.0142268	-0.00879419	0.00311757	-0.00367772	0.038479	-0.0130567	-0.0029246	-0.000346314	0.00115004	0.00579127	0.00515634
Dynlt2b:ENSMUST00000080316.7	-0.0204354	-0.0255879	-0.0248455	0.0263912	0.0227627	0.024708	0.00283862	-0.00017532	-0.0368669	0.0202202	0.0237098	-0.018535	0.0128467	0.0040546	-0.0343196	0.0279558	0.03462	0.0139478	0.0251771	0.0175226	-0.00910606	0.0182239	0.00460067	0.000220704	-0.0157207	0.00787098	-0.00670713	0.00890859	0.0308234	-0.029576	-0.00467489	-0.01039	-0.0195634	0.0164018	0.0022153
1110059G10Rik:ENSMUST00000035154.3	-0.00734736	-0.0320667	-0.0259165	0.00782663	0.0318449	0.030537	0.00308971	0.0937651	-0.0314111	0.00648179	0.0198201	0.00422862	0.022076	0.0246726	0.0114309	0.0392743	0.019243	0.0365209	0.037026	0.118994	-0.00546781	0.0126438	0.0255476	0.0124512	-0.0302057	0.027307	0.0191975	0.0183669	-0.0478047	-0.0110412	0.004964	0.0320222	0.0114787	-0.00218248	0.00338604
Lias:ENSMUST00000031101.9	0.0524965	0.00790205	0.0357277	-0.047889	-0.0401341	-0.0349062	0.0444417	-0.0273456	0.0208936	-0.0270787	-0.00674519	-0.0902026	-0.0293876	-0.0730684	-0.147517	-0.034632	-0.00834793	-0.0519588	-0.0632363	-0.0596809	-0.0570689	-0.0361115	-0.0704888	0.056879	0.0406632	-0.0737588	-0.0332812	-0.0511306	0.0460464	-0.0786854	-0.0721733	-0.064612	-0.0922049	-0.0528516	-0.052591
Ptp4a2:ENSMUST00000165853.1	0.0293006	0.016209	0.0216135	-0.00296354	-0.00778792	-0.00754559	0.0228781	-0.00391463	0.0133103	-0.0151139	0.00200986	-0.0308993	-0.01895	-0.0182756	-0.0211065	-0.0268705	0.00671972	-0.00124852	-0.00457324	-0.0215304	-0.00530698	-0.0100744	-0.0112488	0.0386074	0.0153796	-0.0144639	0.0035003	-0.00777309	0.0186588	-0.0126975	-0.00844624	-0.0132736	-0.0116762	-0.0142607	-0.0037334
