# Supplementary material for: Infernape uncovers cell type–specific and spatially resolved alternative polyadenylation in the brain
Source: HighWire-hosted journal article supplement (doi:10.1101/gr.277864.123), 2023-10-01
Supplement: Supplemental_Tables.zip [file Supplemental_Table_S12.xlsx]

## Sheet: cell type hierarchy
Cell type hierarchy for the adult mouse brain data
Source: Zeisel A, Hochgerner H, Lonnerberg P, Johnsson A, Memic F, van der Zwan J, Haring M, Braun E, Borm LE, La Manno G et al. 2018. Molecular Architecture of the Mouse Nervous System. Cell 174: 999-1014 e1022.
level1	level2	level3	level4	# of clusters	# of cells	actual # of cells
Neurons	CNS neurons	Immature neural	Glutamatergic neuroblasts	4	644	603
			Non-glutamatergic neuroblasts	5	4822	4802
		Telencephalon interneurons	Olfactory inhibitory neurons	9	5191	5177
			Telencephalon inhibitory interneurons	20	8637	8609
		Cholinergic, monoaminergic and peptidergic neurons	Cholinergic and monoaminergic neurons	16	1071	614
			Peptidergic neurons	15	2906	2523
		Spinal cord neurons	Spinal cord excitatory neurons	11	1166	1090
			Spinal cord inhibitory neurons	10	756	673
		Di- and mesencephalon neurons	Di- and mesencephalon excitatory neurons	22	6455	6086
			Di- and mesencephalon inhibitory neurons	17	4026	3358
		Cerebellum neurons	Cerebellum neurons	6	5292	5112
		Telencephalon projecting neurons	Telencephalon projecting excitatory neurons	24	18799	18790
			Dentate gyrus granule neurons	2	4368	4368
			Telencephalon projecting inhibitory neurons	6	5691	5678
	PNS neurons	Enteric neurons	Enteric neurons	9	1105	1105
		Peripheral sensory neurons	Peripheral sensory peptidergic neurons	8	565	564
			Peripheral sensory non-peptidergic neurons	6	889	888
Glia	CNS glia	Oligodendrocytes	Oligodendrocytes	9	30253	21667
			Ependymal cells	3	1257	993
			Subventricular zone radial glia-like cells	1	756	748
			Astrocytes	7	19377	18869
	Neural crest-like glia		Olfactory ensheathing cells	1	2031	2020
			Oligodendrocyte precursor cells	1	820	795
			Satellite glia	2	684	679
			Enteric glia	9	10535	10519
Vascular cells			Vascular and leptomeningeal cells	3	1501	1379
			Vascular smooth muscle cells	3	1628	1481
			Pericytes	2	5213	5104
			Vascular endothelial cells	2	3805	3733
Immune cells			Perivascular macrophages	2	2029	1754
			Microglia	3	5425	5296
					157697	145077
