# Supplementary material for: Infernape uncovers cell type–specific and spatially resolved alternative polyadenylation in the brain
Source: HighWire-hosted journal article supplement (doi:10.1101/gr.277864.123), 2023-10-01
Supplement: Supplemental_Tables.zip [file Supplemental_Table_S14.xlsx]

## Sheet: WARM
WARM values for each selected cell-type in the adult mouse brain dataset(Fig.6D)
	Cerebellum_neurons	Cholinergic,_monoaminergic_and_peptidergic_neurons	Di-_and_mesencephalon_neurons	Immature_neural	Spinal_cord_neurons	Telencephalon_interneurons	Telencephalon_projecting_neurons	Enteric_neurons	Astroependymal_cells	Neural_crest-like_glia	Oligodendrocytes	Immune_cells	Vascular_cells
Gpm6a:ENSMUST00000033915.8	0.795336	0.748015	0.784266	0.778097	0.688223	0.815868	0.329902	NA	0.868829	0.819994	0.704141	0.597542	0.649306
Rundc3a:ENSMUST00000107105.8	0.861449	0.578264	0.585779	0.86531	0.708264	0.630066	0.599967	0.875204	0.909126	0.922481	0.935817	0.725	0.795322
Dda1:ENSMUST00000124745.7	0.576271	0.282159	0.296991	0.482972	0.290873	0.319788	0.352988	0.524818	0.760116	0.7035	0.63977	0.687601	0.667969
Mpp3:ENSMUST00000100400.8	0.892265	0.883495	0.92973	0.882206	0.899522	0.859615	0.514099	0.945607	0.758065	0.791667	0.711111	0.5	0.783784
Ybx1:ENSMUST00000079644.12	0.786697	0.713509	0.724698	0.693327	0.682103	0.611885	0.651452	0.555107	0.695277	0.607237	0.701758	0.698562	0.70592
Ppfia4:ENSMUST00000168515.7	0.767797	0.631318	0.643458	0.700483	0.6	0.583005	0.601263	0.540179	0.472103	0.382353	0.542169	0.494737	0.444444
Luc7l3:ENSMUST00000107820.1	0.303944	0.102771	0.170458	0.151231	0.186207	0.165702	0.135575	0.166456	0.114655	0.121532	0.0764999	0.122024	0.096571
Rbx1:ENSMUST00000023036.6	0.562701	0.411868	0.393828	0.462072	0.332623	0.373266	0.451517	0.411231	0.259627	0.28653	0.197559	0.19511	0.189786
Chchd10:ENSMUST00000219839.1	0.67517	0.532109	0.600004	0.63958	0.643612	0.497182	0.502687	0.259022	0.575939	0.532113	0.533911	0.547908	0.565095
Dynlt1a:ENSMUST00000169415.2	0.352113	0.247488	0.240964	0.205772	0.337626	0.139476	0.203697	0.106834	0.240793	0.135067	0.241859	0.267085	0.253915
Trpv2:ENSMUST00000018651.13	0.716853	0.717414	0.735231	0.713686	0.746393	0.637349	0.707258	0.545106	0.72387	0.575304	0.723892	0.713194	0.710772
Tomm6:ENSMUST00000113301.1	0.499032	0.374791	0.439905	0.467781	0.532588	0.401584	0.415925	0.295999	0.441572	0.312182	0.437778	0.431928	0.430895
Ogdh:ENSMUST00000003461.14	0.26738	0.133521	0.132237	0.257541	0.157258	0.131601	0.115157	0.128435	0.149931	0.17293	0.0751473	0.183844	0.155637
Cadm1:ENSMUST00000114548.7	0.295604	0.240543	0.286197	0.207119	0.0949887	0.195751	0.2476	0.361693	0.246024	0.24732	0.247993	0.123279	0.150574
Actr2:ENSMUST00000000137.7	0.943585	0.869223	0.902139	0.91386	0.902357	0.87818	0.925804	0.876852	0.938464	0.908179	0.903553	0.89316	0.891101
Smarca4:ENSMUST00000098948.9	0.226039	0.0911384	0.0815157	0.167497	0.226741	0.106196	0.0766431	0.226842	0.119673	0.235105	0.10434	0.173034	0.122453
Epb41l1:ENSMUST00000103137.9	0.674641	0.58399	0.625732	0.577503	0.55332	0.599905	0.477847	0.427461	0.475909	0.390244	0.441207	0.4125	0.398833
Tmem30a:ENSMUST00000034878.11	0.769026	0.713259	0.727157	0.654074	0.64357	0.717592	0.710435	0.656702	0.606093	0.467233	0.670142	0.338584	0.590122
Cdip1:ENSMUST00000004173.11	0.260483	0.238224	0.229505	0.275349	0.224144	0.225554	0.231484	0.251225	0.299547	0.310148	0.301214	0.308666	0.312274
Calm1:ENSMUST00000110082.10	0.16089	0.13529	0.202068	0.126321	0.120485	0.0986201	0.163002	0.220542	0.14592	0.132513	0.130332	0.120241	0.121495
Rps25:ENSMUST00000080300.8	0.249692	0.0791467	0.136324	0.221389	0.0452741	0.0726635	0.114469	NA	0.15581	0.0244032	0.157657	0.117324	0.0981458
Cntn2:ENSMUST00000086521.10	0.221748	0.0946372	0.0860381	0.113861	0.0718232	0.0760083	0.0906274	0.0880829	0.130435	0	0.109598	0.0882353	0.0686275
Gadd45gip1:ENSMUST00000036734.5	0.325279	0.176513	0.246529	0.354045	0.236805	0.13874	0.195119	0.257831	0.297476	0.427835	0.208201	0.301518	0.312964
Dynlt1b:ENSMUST00000179569.2	0.281682	0.188474	0.18127	0.174027	0.275132	0.102392	0.150849	0.0787037	0.193687	0.0996436	0.17965	0.206441	0.203348
Rbm8a:ENSMUST00000198027.4	0.216244	0.196961	0.258071	0.192047	0.189689	0.175785	0.227857	0.196778	0.185918	0.197425	0.18279	0.17487	0.159402
Fam32a:ENSMUST00000003123.9	0.819305	0.777574	0.782363	0.821761	0.775114	0.761442	0.759832	0.783603	0.71658	0.782211	0.735757	0.758096	0.765937
Hnrnpk:ENSMUST00000116403.8	0.602476	0.550233	0.57518	0.365222	0.447911	0.567052	0.452831	0.518243	0.419599	0.365657	0.446308	0.400139	0.391065
Amfr:ENSMUST00000053766.13	0.422134	0.309782	0.298511	0.298377	0.298512	0.324079	0.316428	0.265252	0.262877	0.266424	0.262514	0.263661	0.262423
Map3k12:ENSMUST00000023812.9	0.211401	0.0927536	0.0983865	0.2	0.210046	0.0856124	0.102675	0.0595611	0.207951	0.218121	0.15534	0.25	0.207469
Ube2i:ENSMUST00000049911.15	0.74917	0.680738	0.677145	0.442307	0.571256	0.683024	0.685969	0.605085	0.623617	0.494069	0.619439	0.413854	0.418449
Cfl2:ENSMUST00000078124.7	0.265625	0.115178	0.182028	0.199176	0.0613636	0.11391	0.179548	0.195599	0.237351	0.21571	0.0845203	0.101887	0.177195
Rpl9:ENSMUST00000127874.5	0.941634	0.808216	0.94934	0.914515	0.952731	0.898543	0.75895	0.902273	0.880468	0.917466	0.910626	0.872845	0.911665
Dbndd2:ENSMUST00000109349.8	0.394866	0.45233	0.377835	0.29955	0.293292	0.40143	0.255273	0.126421	0.124855	0.0833089	0.0427335	0.0922882	0.0880202
Sdf4:ENSMUST00000050078.12	0.354701	0.3101	0.374406	0.151762	0.191312	0.23429	0.219802	0.209336	0.147982	0.0946363	0.0630963	0.04662	0.100951
Glud1:ENSMUST00000022322.16	0.752327	0.680861	0.668769	0.701579	0.693228	0.684976	0.680923	0.655317	0.681884	0.734144	0.737557	0.661422	0.768336
Scn8a:ENSMUST00000108909.8	0.253692	0.309103	0.393461	0.333333	0.342175	0.352486	0.348533	0.305164	0.226079	0.137255	0.202586	0.333333	0.246269
Syt4:ENSMUST00000025110.4	0.508109	0.65645	0.663032	0.551912	0.685039	0.553124	0.610209	0.655935	0.728595	0.638589	0.686581	0.649706	0.655402
Grm1:ENSMUST00000105561.8	0.361045	0.50501	0.58117	0.459098	0.413338	0.44632	0.347184	NA	0.252175	0.159404	0.208109	0.191827	0.126013
Ddx5:ENSMUST00000021062.11	0.42403	0.594768	0.655023	0.27075	0.395854	0.566817	0.507993	0.472451	0.2599	0.270257	0.26219	0.137252	0.241232
Wscd2:ENSMUST00000094452.3	0.075227	0.382871	0.279244	0.210328	0.209414	0.161792	0.103808	0.199847	0.188657	0.0599767	0.0764336	0.512153	0.259253
Zmat2:ENSMUST00000001419.9	0.0982633	0.0958293	0.0949419	0.0633821	0.0760001	0.08674	0.0894397	0.267769	0.0848194	0.567686	0.0798071	0.11523	0.255577
Ensa:ENSMUST00000058230.12	0.796434	0.793762	0.791144	0.771879	0.963439	0.856415	0.936749	0.454039	0.744932	0.59651	0.302698	0.690878	0.529859
Pacsin1:ENSMUST00000232437.1	0.292177	0.451915	0.50873	0.306852	0.30058	0.374521	0.372189	0.353272	0.245528	0.209493	0.22227	0.185525	0.238109
Nefl:ENSMUST00000022639.7	0.431968	0.552298	0.55043	0.371429	0.480274	0.450887	0.551391	0.462882	0.455285	0.187251	0.510903	0.591667	0.524194
Kcna1:ENSMUST00000055168.4	0.305109	0.294032	0.545122	0.23819	0.293139	0.366278	0.398814	0.416497	0.369586	0.309556	0.376355	0.245957	0.420063
Amer2:ENSMUST00000022561.8	0.192523	0.334584	0.442064	0.177252	0.188346	0.237077	0.30186	0.263008	0.217459	0.180441	0.248542	0.232715	0.223328
Plcxd3:ENSMUST00000061925.4	0.347973	0.533471	0.508252	0.334821	0.279446	0.40881	0.470373	0.442095	0.458824	0.407407	0.462963	0.473684	0.36
Kcna2:ENSMUST00000038695.5	0.537634	0.649402	0.704186	0.629981	0.453061	0.622066	0.630602	0.586022	0.550567	0.5869	0.527855	0.529412	0.515385
Klf13:ENSMUST00000183817.1	0.317614	0.531863	0.641397	0.338101	0.30303	0.360947	0.424048	0.542199	0.405628	0.522714	0.506267	0.318841	0.397764
G3bp2:ENSMUST00000167918.7	0.41925	0.610203	0.623844	0.310727	0.447034	0.499232	0.521519	0.616048	0.411259	0.448052	0.442904	0.209586	0.366883
Cadm3:ENSMUST00000111220.7	0.323293	0.289082	0.337101	0.330065	0.296285	0.374828	0.448109	0.273367	0.279704	0.0911841	0.235625	0.253073	0.285526
Rab14:ENSMUST00000028238.14	0.363904	0.531633	0.642336	0.312076	0.337679	0.368576	0.500316	0.559785	0.435104	0.437999	0.395582	0.322254	0.355568
Cryzl1:ENSMUST00000073466.12	0.635784	0.676719	0.817535	0.566117	0.902301	0.845417	0.703088	0.902493	0.717141	0.843117	0.795843	0.716221	0.707938
Rab6a:ENSMUST00000107048.7	0.504155	0.618858	0.632901	0.529579	0.521467	0.50962	0.691754	0.546855	0.611704	0.51977	0.577358	0.491758	0.534376
Reep5:ENSMUST00000006027.6	0.687049	0.860594	0.88605	0.542323	0.685981	0.774112	0.802282	0.746527	0.411218	0.283538	0.249495	0.157374	0.171218
Idh3a:ENSMUST00000217484.1	0.276403	0.458313	0.480294	0.238484	0.330867	0.379214	0.385731	0.521854	0.216995	0.213592	0.180202	0.167808	0.173814
Higd1a:ENSMUST00000215007.1	0.269582	0.450353	0.462577	0.289703	0.38	0.419733	0.364239	0.433935	0.195533	0.241541	0.221857	0.160939	0.127485
Frrs1l:ENSMUST00000053681.5	0.397114	0.606139	0.609045	0.563034	0.505814	0.536232	0.528352	0.488402	0.519416	0.476215	0.441985	0.421658	0.473706
Actb:ENSMUST00000100497.10	0.534182	0.830046	0.831858	0.281532	0.466396	0.551259	0.720624	0.786142	0.845844	0.69567	0.515522	0.583621	0.624948
Jun:ENSMUST00000107094.1	0.370901	0.431942	0.503979	0.423283	0.364041	0.461879	0.485327	0.438048	0.427945	0.373925	0.451222	0.413448	0.377198
Nrxn1:ENSMUST00000072671.13	0.0997126	0.316335	0.358702	0.21051	0.153815	0.256265	0.202846	0.629371	0.374989	0.414671	0.336714	0.192661	0.233429
Snrk:ENSMUST00000118886.8	0.354571	0.53598	0.540842	0.43769	0.385185	0.482066	0.454366	0.462291	0.423134	0.370899	0.391993	0.37987	0.393797
Syn2:ENSMUST00000169345.3	0.620544	0.800263	0.838383	0.65094	0.588439	0.686714	0.765887	0.692962	0.643826	0.65552	0.71387	0.693089	0.663507
Ube2b:ENSMUST00000020657.12	0.429439	0.496454	0.526297	0.3895	0.45766	0.490802	0.473434	0.437024	0.425177	0.370901	0.43055	0.384614	0.355058
Celf4:ENSMUST00000115816.2	0.325996	0.416739	0.431292	0.350262	0.385265	0.368257	0.366757	0.529884	0.298315	0.405118	0.366759	0.350422	0.324941
Kcnj9:ENSMUST00000062387.7	0.557683	0.642171	0.728194	0.591451	0.651793	0.729342	0.646902	0.656711	0.61374	0.450287	0.62373	0.431023	0.530212
Tmem178:ENSMUST00000025092.4	0.03708	0.0619266	0.0536332	0.013346	0.0209424	0.0510776	0.266405	0.0222222	0.0620155	0	0.00749064	0.230769	0.00995025
Set:ENSMUST00000102866.9	0.328006	0.355305	0.398083	0.283873	0.323765	0.313651	0.385255	0.381537	0.410599	0.334277	0.292565	0.293128	0.307584
Tecpr1:ENSMUST00000085701.6	0.251359	0.434978	0.429437	0.344519	0.304668	0.437189	0.388776	0.386691	0.346641	0.330394	0.453222	0.266667	0.411286
Hsbp1:ENSMUST00000034300.7	0.424967	0.519601	0.604949	0.500122	0.516768	0.612768	0.601389	0.49225	0.367697	0.366761	0.298625	0.37131	0.339158
Gria2:ENSMUST00000075316.9	0.208167	0.429266	0.376566	0.265498	0.348964	0.310358	0.419474	0.497436	0.147527	0.267062	0.166667	0.392857	0.282759
Rpl27a:ENSMUST00000143107.1	0.0117951	0.316432	0.168692	0.286862	0.216475	0.169664	0.196974	0.483618	0.242029	0.390195	0.17407	0.24478	0.217929
Mgll:ENSMUST00000113585.8	0.267412	0.440485	0.548382	0.342282	0.353513	0.363901	0.374563	0.386464	0.500867	0.302919	0.345189	0.229007	0.392882
Cope:ENSMUST00000066469.13	0.304009	0.529954	0.4778	0.630368	0.836809	0.519802	0.458668	0.585799	0.556849	0.57737	0.541315	0.534804	0.603239
Dpp6:ENSMUST00000120555.7	0.0808897	0.0757661	0.0674289	0.111523	0.0728898	0.0810042	0.112451	0.0801803	0.0958073	0.070539	0.0764651	0.081158	0.0693224
Sbk1:ENSMUST00000056028.10	0.0746432	0.645089	0.453076	0.0675381	0.760714	0.176134	0.35053	0.151261	0.140569	0.431981	0.283327	0.683673	0.642857
Nell2:ENSMUST00000166170.8	0.677249	0.952234	0.923258	0.92196	0.982353	0.842412	0.914054	0.980349	0.820553	0.986212	0.923636	0.96875	0.960317
Gas7:ENSMUST00000108682.8	0.598556	0.899871	0.86456	0.826915	0.788042	0.922406	0.915516	0.860872	0.799495	0.816207	0.78629	0.676089	0.850392
Rnmt:ENSMUST00000009679.10	0.222382	0.611559	0.607521	0.402985	0.506579	0.580083	0.503633	0.556911	0.303426	0.266075	0.27704	0.176101	0.205011
Zcchc17:ENSMUST00000134159.2	0.376872	0.55975	0.657431	0.676508	0.453231	0.748453	0.663822	0.319493	0.623625	0.508791	0.608105	0.59237	0.547674
Mtln:ENSMUST00000135091.1	0.19567	0.50552	0.545067	0.386043	0.662673	0.795406	0.680615	0.596419	0.496425	0.408831	0.453749	0.559921	0.488441
Tmem203:ENSMUST00000104998.4	0.448	0.502716	0.260234	0.22245	0.0699165	0.167432	0.227368	0.0903926	0.197268	0.088739	0.181736	0.0636344	0.0565904
Vamp4:ENSMUST00000135241.7	0.262087	0.537211	0.459746	0.20439	0.227462	0.351514	0.260743	0.687887	0.318496	0.211868	0.190514	0.0985353	0.12354
Txnl1:ENSMUST00000025476.3	0.15528	0.393764	0.322532	0.0479532	0.0858209	0.34666	0.0226788	0.289503	0.194886	0.0892566	0.114683	0.0414201	0.069917
Extl2:ENSMUST00000029575.11	0.144147	0.147977	0.146754	0.122608	0.117874	0.146442	0.178441	0.15341	0.129412	0.114653	0.158161	0.0768098	0.0951549
Fbxw2:ENSMUST00000028220.9	0.0497427	0.267442	0.0789359	0.0414903	0.165698	0.0630915	0.0438116	0.0798898	0.15186	0.0820073	0.185247	0.07	0.0746702
Klhl23:ENSMUST00000053087.3	0.691762	0.764579	0.754854	0.708854	0.69066	0.734196	0.739252	0.731658	0.70412	0.663696	0.725032	0.733056	0.722099
Ppif:ENSMUST00000022419.6	0.273148	0.32973	0.120238	0.139759	0.234742	0.0670886	0.1596	0.336634	0.146958	0.401656	0.294833	0.14094	0.212575
Cpd:ENSMUST00000021201.5	0.833672	0.847617	0.852853	0.819642	0.8201	0.825258	0.750722	0.837411	0.853057	0.849429	0.870363	0.833841	0.908936
Gmcl1:ENSMUST00000001185.13	0.817309	0.837574	0.761436	0.79266	0.682951	0.771766	0.534399	0.876383	0.824363	0.827706	0.825426	0.837854	0.848343
Lrrc58:ENSMUST00000078717.6	0.425828	0.733958	0.681228	0.320766	0.463505	0.481467	0.502644	0.661255	0.752091	0.696463	0.653789	0.368959	0.656711
Csk:ENSMUST00000034863.7	0.544643	0.75	0.594225	0.806801	0.434066	0.753108	0.128952	0.834646	0.894309	0.664839	0.934086	0.594235	0.885071
Kif3c:ENSMUST00000020999.6	0.531148	0.670954	0.65859	0.315522	0.464174	0.607794	0.399596	0.498361	0.368296	0.146879	0.253374	0.272727	0.2125
Srp9:ENSMUST00000027792.5	0.464252	0.563246	0.550028	0.45268	0.425772	0.579648	0.239561	0.610426	0.429216	0.354136	0.412301	0.320043	0.28808
Celf6:ENSMUST00000118549.7	0.608696	0.831062	0.787017	0.638093	0.659376	0.721092	0.616803	0.764828	0.767384	0.803348	0.782172	0.79429	0.771102
Lancl1:ENSMUST00000027149.11	0.195312	0.446809	0.34534	0.133829	0.148889	0.198169	0.297822	0.338521	0.21351	0.0682523	0.209533	0.123348	0.136076
Wdfy1:ENSMUST00000113512.7	0.669167	0.770246	0.7629	0.435334	0.525894	0.644741	0.51473	0.67075	0.628598	0.502311	0.66251	0.364412	0.419299
Fam172a:ENSMUST00000091459.11	0.435644	0.565598	0.477064	0.390675	0.407895	0.378593	0.385921	0.641026	0.38913	0.510978	0.482608	0.37156	0.44142
Rit2:ENSMUST00000153060.7	0.834507	0.83997	0.845868	0.788235	0.68955	0.860049	0.447148	0.917673	0.826705	0.860465	0.809816	0.717949	0.779412
Tmem87b:ENSMUST00000110325.7	0.332459	0.351231	0.345771	0.318998	0.235598	0.351963	0.277498	0.38607	0.419379	0.364272	0.464401	0.338656	0.40626
Kalrn:ENSMUST00000114973.8	0.727273	0.907895	0.924557	0.939759	0.886792	0.931311	0.602214	0.9375	0.54	0.684211	0.794872	0.875	0.428571
Serbp1:ENSMUST00000042990.6	0.170517	0.195591	0.22487	0.0964576	0.133352	0.133242	0.146196	0.088975	0.137696	0.0817591	0.104007	0.0878265	0.0920183
Gatd1:ENSMUST00000106008.2	0.1132	0.294482	0.161139	0.0879452	0.101476	0.134526	0.156399	0.221614	0.102171	0.0965061	0.230589	0.0845997	0.104537
Tpm1:ENSMUST00000113690.7	0.635937	0.63659	0.674597	0.556724	0.476793	0.612019	0.459309	0.640669	0.845022	0.979365	0.863052	0.793487	0.992228
Ttl:ENSMUST00000035812.13	0.481013	0.682883	0.627227	0.506135	0.350785	0.570411	0.516431	0.639262	0.797452	0.576737	0.616505	0.482353	0.637854
Nudt21:ENSMUST00000034204.10	0.41398	0.490711	0.518348	0.109852	0.311023	0.395585	0.499193	0.435068	0.31619	0.149056	0.16435	0.0587889	0.113619
Mblac2:ENSMUST00000057598.6	0.317073	0.551689	0.567232	0.315961	0.25	0.357188	0.396565	0.553672	0.375796	0.370277	0.396651	0.185567	0.369403
Slit1:ENSMUST00000169141.7	0.571429	0.71997	0.772775	0.704819	0.642077	0.770683	0.470507	0.851852	0.408451	0.837838	0.219697	0.470588	0.727273
Slc8a1:ENSMUST00000234131.1	0.627979	0.468845	0.530472	0.41519	0.465335	0.427862	0.322853	0.713074	0.405312	0.502187	0.655401	0.464357	0.623298
Tial1:ENSMUST00000106226.8	0.526836	0.658255	0.647589	0.368112	0.504265	0.620673	0.424612	0.506378	0.34482	0.278972	0.292125	0.149664	0.194049
Dpysl3:ENSMUST00000121805.8	0.7	0.871399	0.90179	0.462059	0.668269	0.729362	0.80418	0.788972	0.807988	0.587036	0.621429	0.666667	0.679121
Prmt3:ENSMUST00000032715.12	0.153846	0.290657	0.198964	0.0828221	0.097561	0.144033	0.139976	0.2125	0.1008	0.0915119	0.071161	0.0224719	0.0725076
Cnih4:ENSMUST00000134115.7	0.3375	0.5	0.518429	0.20242	0.283871	0.43853	0.309105	0.328859	0.242096	0.150993	0.258065	0.0725338	0.121242
Cwc15:ENSMUST00000004200.8	0.633242	0.847664	0.902062	0.702558	0.922598	0.654697	0.647542	0.549155	0.774957	0.506594	0.838134	0.795202	0.802359
Nos1ap:ENSMUST00000160456.7	0.817789	0.915144	0.846326	0.980932	0.950157	0.856876	0.760077	0.907708	0.968654	0.997303	0.996174	0.962583	0.996789
Rab27b:ENSMUST00000121693.7	0.532019	0.512334	0.4834	0.36041	0.331388	0.413949	0.377383	0.69727	0.396805	0.453143	0.336921	0.25192	0.386595
Sc5d:ENSMUST00000052725.14	0.632042	0.799113	0.778229	0.614743	0.618596	0.405074	0.65441	0.532106	0.585366	0.41235	0.514997	0.365506	0.49452
Me1:ENSMUST00000034989.14	0.715447	0.666667	0.568481	0.572917	0.381503	0.585903	0.513646	0.675599	0.79598	0.66438	0.627393	0.384615	0.616162
Wdr37:ENSMUST00000054251.12	0.956517	0.9473	0.923126	0.886588	0.792358	0.913982	0.649276	0.934127	0.947211	0.911025	0.946422	0.864332	0.91065
Fbxo31:ENSMUST00000059018.13	0.393305	0.485861	0.469973	0.33719	0.282723	0.340063	0.332143	0.561644	0.419588	0.328098	0.456346	0.247664	0.300752
5730409E04Rik:ENSMUST00000097886.3	0.475	0.853061	0.850765	0.621849	0.690096	0.743893	0.674808	0.632887	0.714286	0.383838	0.502538	0.635593	0.616525
Ankrd40:ENSMUST00000051221.12	0.746737	0.800738	0.734893	0.688857	0.63939	0.762683	0.608801	0.866025	0.689777	0.77841	0.692121	0.741867	0.736727
Mat2a:ENSMUST00000205335.1	0.470588	0.640443	0.60107	0.482778	0.44252	0.461155	0.501811	0.481172	0.529729	0.411049	0.639673	0.552982	0.585859
Pten:ENSMUST00000013807.7	0.394153	0.429452	0.469157	0.377697	0.277102	0.31767	0.355409	0.32101	0.436353	0.443488	0.382079	0.372567	0.412316
Ncs1:ENSMUST00000000199.7	0.207084	0.207164	0.148172	0.040404	0.121891	0.165085	0.00473287	0.224793	0.0778816	0.0638298	0.559086	0.146341	0.170213
Dpm1:ENSMUST00000154111.7	0.143712	0.159274	0.173569	0.115523	0.105864	0.14494	0.130009	0.119408	0.0921221	0.0874722	0.0908038	0.0856997	0.0899148
Snhg11:ENSMUST00000109488.7	0.257082	0.354051	0.334828	0.248627	0.162414	0.153263	0.226551	0.150654	0.474239	0.369849	0.463522	0.56559	0.460446
Spring1:ENSMUST00000049138.7	0.387868	0.368788	0.322827	0.329652	0.159593	0.193602	0.22814	0.367159	0.237421	0.348817	0.190927	0.237539	0.417411
Lman2:ENSMUST00000021940.7	0.677745	0.745847	0.709148	0.467746	0.562955	0.588819	0.621904	0.721	0.615058	0.453627	0.600092	0.279758	0.405715
Lnpk:ENSMUST00000111993.8	0.484199	0.51243	0.424328	0.320745	0.381414	0.414674	0.392167	0.439903	0.394044	0.35414	0.294002	0.263405	0.398733
Tmem189:ENSMUST00000006587.6	0.341121	0.467687	0.381143	0.539604	0.346939	0.386799	0.312823	0.53343	0.573588	0.501515	0.382171	0.620991	0.618972
Cdkn1a:ENSMUST00000233296.1	0.316327	0.498516	0.511156	0.258065	0.298387	0.398897	0.36432	0.436541	0.311964	0.315343	0.309576	0.174779	0.30684
Fam160a2:ENSMUST00000179474.8	0.467653	0.547092	0.521779	0.421674	0.367954	0.468486	0.402985	0.387454	0.268507	0.221508	0.320396	0.125444	0.267981
Bcr:ENSMUST00000164107.2	0.768519	0.822695	0.756556	0.813699	0.719577	0.803462	0.655106	0.850877	0.802211	0.760274	0.744863	0.730769	0.513315
Dusp12:ENSMUST00000027970.13	0.358079	0.291595	0.215061	0.0924731	0.167286	0.112198	0.173895	0.0675676	0.253731	0.0667996	0.147258	0.0640177	0.115552
Otud5:ENSMUST00000033494.15	0.393144	0.553333	0.566749	0.3021	0.436926	0.459865	0.395323	0.363133	0.316268	0.252779	0.28612	0.21603	0.290693
Hspa13:ENSMUST00000114244.1	0.305449	0.503907	0.516853	0.274995	0.382856	0.352699	0.374392	0.744328	0.309027	0.655542	0.420491	0.248028	0.368558
Brix1:ENSMUST00000022855.11	0.160839	0.255556	0.319506	0.0942857	0.0788177	0.0906736	0.0981896	0.237864	0.106686	0.0874904	0.134752	0.0512821	0.0852941
Ccdc59:ENSMUST00000020049.8	0.369639	0.534406	0.568702	0.466282	0.547579	0.403756	0.432744	0.547389	0.490995	0.547514	0.558103	0.477728	0.508123
Emc8:ENSMUST00000181950.1	0.22807	0.404878	0.408595	0.103203	0.136612	0.306737	0.290987	0.264339	0.165822	0.0956637	0.091047	0.0465116	0.0902655
Golga7b:ENSMUST00000122375.7	0.739683	0.744595	0.703805	0.675781	0.506803	0.57382	0.613973	0.473276	0.728889	0.541667	0.733871	0.673469	0.683544
Chmp4b:ENSMUST00000044277.9	0.729072	0.852414	0.844863	0.65283	0.737033	0.667668	0.716393	0.730383	0.659896	0.516028	0.677867	0.475129	0.34821
Kif3a:ENSMUST00000120613.8	0.66501	0.746996	0.729183	0.568696	0.628107	0.550965	0.606009	0.538305	0.591511	0.445704	0.715928	0.458439	0.4114
Itsn1:ENSMUST00000114002.8	0.588042	0.632674	0.675677	0.497156	0.541696	0.666682	0.334306	0.51438	0.325999	0.210122	0.469643	0.04413	0.177135
Derl1:ENSMUST00000022993.6	0.729519	0.817071	0.782321	0.712266	0.677135	0.745692	0.695245	0.674504	0.652507	0.603592	0.63341	0.556478	0.523589
Nicn1:ENSMUST00000035227.7	0.448352	0.767738	0.751696	0.451872	0.538036	0.616911	0.657384	0.559417	0.56	0.406457	0.596993	0.52518	0.543054
Zfyve27:ENSMUST00000169536.7	0.370817	0.47482	0.408504	0.278978	0.348034	0.374089	0.340137	0.389905	0.395741	0.310832	0.291931	0.18196	0.28826
Atp6v1g1:ENSMUST00000035301.6	0.790051	0.834446	0.864829	0.869004	0.814957	0.893882	0.553115	0.896031	0.831854	0.818768	0.857597	0.834966	0.805194
Sap30l:ENSMUST00000020826.5	0.387097	0.545455	0.525046	0.271552	0.375	0.466606	0.385107	0.551724	0.181238	0.384131	0.235397	0.144231	0.253375
Mapk9:ENSMUST00000109179.8	0.811713	0.904138	0.898998	0.795151	0.847339	0.887123	0.85673	0.675395	0.686701	0.312279	0.56532	0.486963	0.404921
Cebpg:ENSMUST00000130491.2	0.197901	0.327004	0.314087	0.183033	0.177065	0.21882	0.2378	0.271298	0.29162	0.233287	0.243576	0.1735	0.255557
Ncald:ENSMUST00000168992.7	0.516068	0.706986	0.685843	0.499562	0.435143	0.52731	0.592355	0.563769	0.676609	0.513202	0.440922	0.653846	0.585843
Fam114a2:ENSMUST00000020831.12	0.261818	0.451306	0.431359	0.272158	0.244604	0.334196	0.337299	0.441799	0.389853	0.329051	0.382404	0.259409	0.358409
Nkrf:ENSMUST00000239259.1	0.537958	0.524405	0.458173	0.418524	0.483821	0.427557	0.422181	0.310438	0.437172	0.475551	0.515762	0.401723	0.633314
Pik3r1:ENSMUST00000055518.12	0.620435	0.766333	0.749783	0.730655	0.611252	0.661168	0.626978	0.705185	0.835536	0.753457	0.773396	0.762417	0.787054
Trappc5:ENSMUST00000044857.3	0.478405	0.581712	0.632143	0.42404	0.419014	0.432421	0.447143	0.554167	0.368383	0.347676	0.279348	0.232376	0.265816
Wdr12:ENSMUST00000027173.14	0.129551	0.129657	0.118045	0.102865	0.111662	0.124399	0.127611	NA	0.158034	0.169916	0.132925	0.078471	0.13283
Smu1:ENSMUST00000030117.4	0.22043	0.44208	0.391492	0.178947	0.308017	0.272901	0.364085	0.335793	0.168773	0.125	0.139456	0.0586319	0.077187
Tmsb15b2:ENSMUST00000069803.4	0.335664	0.455959	0.427844	0.233732	0.362445	0.369048	0.332834	0.213333	0.380368	0.234337	0.426132	0.357143	0.240997
Phax:ENSMUST00000008445.6	0.657576	0.706002	0.642485	0.61252	0.560268	0.572988	0.589633	0.800546	0.557971	0.616149	0.555092	0.453333	0.426349
Derl2:ENSMUST00000143850.7	0.267327	0.430868	0.420561	0.338369	0.18254	0.37806	0.287138	0.399038	0.139201	0.13506	0.0747026	0.0368421	0.100639
Them4:ENSMUST00000049822.9	0.463542	0.527307	0.567515	0.373762	0.342466	0.450787	0.3311	0.604037	0.528125	0.47013	0.597031	0.410256	0.577938
Bub3:ENSMUST00000207442.1	0.445455	0.588719	0.564682	0.221329	0.400424	0.487562	0.503906	0.379129	0.301151	0.209507	0.385578	0.134474	0.179793
Rgs7bp:ENSMUST00000063551.6	0.360338	0.516494	0.552396	0.310627	0.284079	0.433785	0.369122	0.415449	0.349997	0.309196	0.408918	0.262322	0.342219
Senp5:ENSMUST00000231360.1	0.906381	0.878574	0.869481	0.807401	0.813661	0.854109	0.69909	0.816278	0.890315	0.830756	0.832755	0.786258	0.90578
Ubfd1:ENSMUST00000033158.5	0.715909	0.856083	0.869618	0.540594	0.630952	0.79105	0.648671	0.850515	0.636364	0.534739	0.498695	0.350877	0.507897
Tmem14c:ENSMUST00000021790.6	0.835484	0.650826	0.721311	0.530273	0.725572	0.449168	0.526322	0.233209	0.622514	0.267922	0.584334	0.567369	0.574144
Exosc2:ENSMUST00000038474.13	0.753247	0.903614	0.83	0.747967	0.902326	0.789416	0.793776	0.865217	0.845874	0.914826	0.88556	0.880711	0.869601
Gng2:ENSMUST00000160013.7	0.565511	0.759489	0.786872	0.45208	0.492287	0.653213	0.596145	0.575379	0.603853	0.400102	0.55024	0.254373	0.484803
Grid1:ENSMUST00000043349.6	0.338302	0.444951	0.4398	0.358396	0.315035	0.316467	0.333857	0.435396	0.226182	0.244491	0.264049	0.33963	0.30152
Usp47:ENSMUST00000210309.1	0.804878	0.791139	0.838568	0.780488	0.857843	0.818844	0.563503	0.71134	0.582203	0.582719	0.70225	0.588235	0.504112
Vma21:ENSMUST00000114577.7	0.588784	0.610842	0.699185	0.485802	0.45164	0.641563	0.394956	0.544357	0.635168	0.355144	0.650621	0.284994	0.359518
Adcy5:ENSMUST00000114913.2	0.596859	0.594595	0.523752	0.510791	0.574713	0.579487	0.475862	0.579151	0.362069	0.5	0.268894	0.307692	0.480059
Gstz1:ENSMUST00000063117.9	0.779661	0.752113	0.679461	0.696275	0.605556	0.626489	0.647638	0.649057	0.708738	0.675815	0.678119	0.691275	0.703774
Rala:ENSMUST00000009003.8	0.344935	0.557767	0.647267	0.335868	0.212177	0.406598	0.454288	0.55119	0.487646	0.491952	0.354403	0.266749	0.259427
Zfp706:ENSMUST00000078976.8	0.437708	0.544076	0.554716	0.436823	0.425205	0.559612	0.392267	0.561117	0.416159	0.385325	0.368837	0.256397	0.263768
Btrc:ENSMUST00000065601.12	0.513252	0.593488	0.584327	0.396067	0.39755	0.522767	0.455763	0.377033	0.261605	0.223596	0.188743	0.129672	0.204249
Atmin:ENSMUST00000109099.3	0.915663	0.91224	0.905443	0.839416	0.902703	0.895474	0.738474	0.885463	0.781327	0.704678	0.79782	0.740196	0.711039
Hs2st1:ENSMUST00000043325.8	0.313888	0.238416	0.258168	0.212187	0.248748	0.288423	0.199383	0.235074	0.273162	0.191992	0.28068	0.209702	0.233503
Nrcam:ENSMUST00000110748.3	0.632457	0.586365	0.572486	0.546356	0.405561	0.596484	0.451488	0.422765	0.357104	0.297883	0.279066	0.381354	0.392709
Afg3l1:ENSMUST00000001520.12	0.315235	0.378671	0.403848	0.223159	0.245154	0.348659	0.285639	0.302325	0.241424	0.176714	0.245565	0.138796	0.175709
Stxbp5l:ENSMUST00000114787.7	0.325383	0.368628	0.350375	0.316731	0.307862	0.315327	0.328522	0.313343	0.50466	0.570267	0.495601	0.34168	0.6008
Kcmf1:ENSMUST00000068697.10	0.137755	0.20347	0.119864	0.136232	0.0962963	0.165783	0.068314	0.300613	0.175396	0.190228	0.164825	0.15	0.207803
Lnpep:ENSMUST00000041047.3	0.877551	0.875912	0.868893	0.824324	0.801887	0.7134	0.756924	0.898734	0.835846	0.881455	0.844118	0.894231	0.880376
Cdk16:ENSMUST00000115364.7	0.796064	0.683044	0.73834	0.757438	0.739097	0.747039	0.811594	0.786763	0.827727	0.911726	0.776903	0.837915	0.936228
Snph:ENSMUST00000094456.9	0.717391	0.709596	0.695977	0.830065	0.704319	0.713738	0.888276	0.595604	0.676834	0.624413	0.737705	0.720588	0.707692
Ankrd52:ENSMUST00000014642.9	0.91877	0.858606	0.901321	0.954629	0.927278	0.89425	0.910799	0.926071	0.93463	0.931316	0.92392	0.905284	0.939708
1500011B03Rik:ENSMUST00000100850.5	0.767045	0.579357	0.663242	0.736295	0.642185	0.720482	0.66675	0.798319	0.724723	0.771488	0.726455	0.652542	0.7723
Psmd10:ENSMUST00000112978.1	0.42623	0.202008	0.31562	0.232416	0.279133	0.251065	0.338276	0.373444	0.192718	0.294118	0.241589	0.273535	0.225577
Ric3:ENSMUST00000055993.12	0.746461	0.577176	0.645851	0.749523	0.54623	0.688068	0.606543	0.715171	0.707398	0.722376	0.736622	0.624567	0.71085
Ranbp6:ENSMUST00000099525.4	0.146067	0.0786517	0.0941673	0.11811	0.0322581	0.0815812	0.315588	0.0774648	0.112069	0.11399	0.0904704	0.0909091	0.13964
Slitrk4:ENSMUST00000069926.13	0.375881	0.301787	0.372957	0.30986	0.34051	0.3873	0.444877	0.435858	0.359123	0.13457	0.44957	0.420959	0.231404
Trim33:ENSMUST00000029444.12	0.410959	0.2267	0.25	0.42963	0.303371	0.298658	0.363006	0.361111	0.272072	0.355457	0.308345	0.209302	0.234522
Gm45716:ENSMUST00000124877.2	0.441176	0.164671	0.292296	0.313175	0.287938	0.306748	0.252498	0.230769	0.202128	0.173228	0.108108	0.211268	0.172043
Pcdhac1:ENSMUST00000007584.3	0.57652	0.408516	0.486447	0.522167	0.455939	0.434863	0.558901	0.497263	0.514815	0.448878	0.5	0.538462	0.519481
Pcdhac2:ENSMUST00000047479.2	0.57652	0.408516	0.486447	0.522167	0.455939	0.434863	0.558901	0.497263	0.514815	0.448878	0.5	0.538462	0.519481
Pcdha1:ENSMUST00000070797.6	0.57652	0.408516	0.486741	0.522167	0.455939	0.434863	0.558901	0.497263	0.514815	0.448878	0.5	0.538462	0.519481
Pcdha11:ENSMUST00000115658.5	0.57652	0.408516	0.486741	0.522167	0.455939	0.434863	0.558901	0.497263	0.514815	0.448878	0.5	0.538462	0.519481
Pcdha12:ENSMUST00000047614.3	0.57652	0.408516	0.486741	0.522167	0.455939	0.434863	0.558901	0.497263	0.514815	0.448878	0.5	0.538462	0.519481
Pcdha2:ENSMUST00000115662.8	0.57652	0.408516	0.486741	0.522167	0.455939	0.434863	0.558901	0.497263	0.514815	0.448878	0.5	0.538462	0.519481
Pcdha3:ENSMUST00000192503.1	0.57652	0.408516	0.486741	0.522167	0.455939	0.434863	0.558901	0.497263	0.514815	0.448878	0.5	0.538462	0.519481
Pcdha4:ENSMUST00000192512.5	0.57652	0.408516	0.486741	0.522167	0.455939	0.434863	0.558901	0.497263	0.514815	0.448878	0.5	0.538462	0.519481
Pcdha5:ENSMUST00000192168.1	0.57652	0.408516	0.486741	0.522167	0.455939	0.434863	0.558901	0.497263	0.514815	0.448878	0.5	0.538462	0.519481
Pcdha6:ENSMUST00000193777.5	0.57652	0.408516	0.486741	0.522167	0.455939	0.434863	0.558901	0.497263	0.514815	0.448878	0.5	0.538462	0.519481
Pcdha7:ENSMUST00000192631.1	0.57652	0.408516	0.486741	0.522167	0.455939	0.434863	0.558901	0.497263	0.514815	0.448878	0.5	0.538462	0.519481
Pcdha8:ENSMUST00000194038.1	0.57652	0.408516	0.486741	0.522167	0.455939	0.434863	0.558901	0.497263	0.514815	0.448878	0.5	0.538462	0.519481
Pcdha9:ENSMUST00000115659.5	0.57652	0.408516	0.486741	0.522167	0.455939	0.434863	0.558901	0.497263	0.514815	0.448878	0.5	0.538462	0.519481
Arpp19:ENSMUST00000169492.7	0.244514	0.263682	0.307229	0.217292	0.24025	0.222397	0.305348	0.224855	0.136275	0.119913	0.164973	0.0841717	0.0711156
Akt3:ENSMUST00000111160.8	0.802947	0.528908	0.620607	0.783261	0.649409	0.607888	0.687924	0.465545	0.734338	0.676158	0.606475	0.664494	0.615661
Otud6b:ENSMUST00000117268.8	0.792862	0.844258	0.891912	0.873376	0.86532	0.868465	0.882853	0.856357	0.860575	0.823358	0.835645	0.806161	0.791207
Def8:ENSMUST00000065534.9	0.191358	0.141809	0.201267	0.144	0.309211	0.167516	0.335614	0.0342857	0.0864333	0.0284168	0.0394231	0.0735294	0.0492611
Psmc6:ENSMUST00000022380.8	0.394868	0.311693	0.37481	0.376811	0.308293	0.379474	0.370985	0.33764	0.395375	0.332042	0.280629	0.337479	0.245338
Klhl24:ENSMUST00000023509.4	0.554353	0.501261	0.541232	0.498896	0.463707	0.531021	0.55781	0.615219	0.527721	0.51572	0.613084	0.431616	0.567187
Ntn3:ENSMUST00000024931.5	0.561595	0.478913	0.507289	0.530864	0.461747	0.473158	0.508111	0.479994	0.509048	0.437939	0.553697	0.545883	0.477442
Ccnc:ENSMUST00000065928.10	0.416705	0.135657	0.169991	0.290234	0.147377	0.175773	0.330195	0.383815	0.488832	0.526701	0.460037	0.311015	0.387814
Pdcd4:ENSMUST00000025931.13	0.966667	0.660674	0.895197	0.893281	0.672897	0.499382	0.858501	0.938679	0.79703	0.972323	0.788034	0.824427	0.806916
Mindy3:ENSMUST00000028105.12	0.589869	0.420435	0.53844	0.488696	0.588579	0.531887	0.556506	0.584525	0.354641	0.412755	0.375531	0.383445	0.314779
Fcor:ENSMUST00000159364.2	0.0487763	0.095646	0.138877	0.128962	0.159546	0.13007	0.109082	0.0817028	0.0854545	0.0617914	0.0643608	0.0464576	0.0963761
Arhgef17:ENSMUST00000107032.2	0.306931	0.144876	0.125191	0.275676	0.0869565	0.267412	0.345388	0.241279	0.449552	0.391753	0.211679	0.37037	0.417196
Agpat5:ENSMUST00000149565.7	0.336221	0.197083	0.240515	0.208381	0.222174	0.277816	0.285525	0.246509	0.155649	0.1238	0.136184	0.106326	0.0972775
Tmem64:ENSMUST00000062684.8	0.811225	0.717156	0.839671	0.666677	0.78615	0.788946	0.816428	0.711985	0.72009	0.590596	0.764615	0.588931	0.5983
Pias1:ENSMUST00000098651.5	0.745336	0.67231	0.750607	0.638878	0.753247	0.709533	0.885165	0.616357	0.59759	0.562578	0.482171	0.501509	0.445463
Jpt1:ENSMUST00000021083.6	0.63242	0.493939	0.474576	0.70194	0.55495	0.452944	0.681731	0.709433	0.717989	0.795105	0.47809	0.763274	0.736529
Cds2:ENSMUST00000103181.10	0.958689	0.802114	0.924587	0.965636	0.951087	0.865573	0.997337	0.6138	0.792047	0.916575	0.395316	0.886228	0.503344
Fxyd2:ENSMUST00000216289.1	1	0.697572	0.964981	0.807292	0.972789	0.938489	0.801789	0.696203	0.849138	0.891089	0.861386	0.880597	0.938144
Zfp966:ENSMUST00000109018.2	0.864696	0.750228	0.766519	0.806285	0.794693	0.788874	0.812455	0.719184	0.806663	0.739544	0.834184	0.755299	0.755347
Paqr9:ENSMUST00000079597.6	0.813725	0.642202	0.709787	0.782051	0.611722	0.715375	0.832873	0.602151	0.847059	0.666667	0.590361	0.75	0.821429
Stxbp5:ENSMUST00000038213.13	0.610764	0.57257	0.618332	0.571621	0.61097	0.62219	0.623159	0.555486	0.504734	0.432832	0.40931	0.413634	0.429099
Ciapin1:ENSMUST00000162538.8	0.0469236	0.0835946	0.147164	0.0815421	0.121398	0.058364	0.454188	NA	0.029737	0.0121684	0.00272771	0.0282873	0.00372084
Psma4:ENSMUST00000034848.13	0.578221	0.450694	0.784826	0.445202	0.232645	0.675496	0.614373	0.624493	0.651781	0.636755	0.603562	0.614294	0.566534
Skp1:ENSMUST00000037324.11	0.375147	0.25035	0.382102	0.399788	0.414141	0.376015	0.454819	0.552525	0.48531	0.561939	0.411026	0.447954	0.410187
Slc25a17:ENSMUST00000023040.8	0.664516	0.685644	0.828428	0.874266	0.794964	0.947483	0.86599	0.992308	0.734532	0.929044	0.767771	0.696	0.747458
Rbm15b:ENSMUST00000055843.8	0.616279	0.268409	0.409449	0.627832	0.32967	0.472952	0.474707	0.471483	0.605341	0.598465	0.699527	0.528736	0.664011
Tnik:ENSMUST00000159236.8	0.417061	0.325747	0.328302	0.420091	0.355792	0.376801	0.4655	NA	0.311439	0.502013	0.304957	0.315702	0.334373
Rgs4:ENSMUST00000111357.1	0.624571	0.672585	0.698597	0.704906	0.559921	0.628875	0.703534	0.684802	0.58866	0.641596	0.582261	0.620752	0.633193
Kcnk9:ENSMUST00000044624.7	0.603227	0.135238	0.168864	0.454692	0.177258	0.270071	0.507651	NA	NA	NA	NA	0.090767	0.253263
Zdhhc8:ENSMUST00000076957.6	0.423077	0.205793	0.263395	0.388571	0.212121	0.281178	0.769845	0.0917782	0.134565	0.112609	0.0952381	0.278261	0.0350282
Zc2hc1a:ENSMUST00000051064.8	0.531217	0.636858	0.781377	0.507143	0.58871	0.537017	0.589904	0.526081	0.539097	0.400019	0.541234	0.374791	0.431133
Mical2:ENSMUST00000050149.11	0.580189	0.41791	0.635551	0.53719	0.595628	0.457871	0.386603	0.195652	0.467075	0.451613	0.536585	0.516129	0.41573
Ddah1:ENSMUST00000029845.14	0.311989	0.53522	0.612798	0.1736	0.254341	0.304497	0.404875	0.598717	0.40235	0.265011	0.472275	0.499921	0.28799
Arl16:ENSMUST00000076921.6	0.485714	0.53386	0.66525	0.470874	0.408696	0.419429	0.447043	0.757576	0.486516	0.667072	0.419662	0.457143	0.469773
Slitrk3:ENSMUST00000192477.1	0.115937	0.169153	0.191966	0.105954	0.0756147	0.140555	0.147341	0.151712	0.116913	0.105841	0.129201	0.0846728	0.0843422
Hmgb1:ENSMUST00000085546.12	0.279297	0.406551	0.51964	0.245963	0.258596	0.315773	0.351607	0.326469	0.37111	0.296206	0.216818	0.281182	0.245304
Atg5:ENSMUST00000039286.4	0.428571	0.476703	0.493827	0.299703	0.355932	0.345541	0.252998	0.534783	0.304864	0.426536	0.400613	0.441034	0.355715
Creg1:ENSMUST00000111432.9	0.52454	0.479592	0.642129	0.398671	0.422886	0.398214	0.477463	0.625	0.48306	0.488285	0.480148	0.25814	0.230525
Ogfrl1:ENSMUST00000027343.5	0.245183	0.411052	0.480509	0.248177	0.241544	0.2402	0.301744	0.296879	0.256881	0.236663	0.248049	0.148595	0.225803
Gfod2:ENSMUST00000013294.15	0.06875	0.229242	0.314021	0.151515	0.303704	0.112205	0.104657	0.123989	0.483757	0.614053	0.573123	0.304348	0.272727
Klf6:ENSMUST00000000080.7	0.0743243	0.320115	0.405133	0.112416	0.0877193	0.191807	0.221372	0.24384	0.171504	0.0951559	0.170886	0.10379	0.124751
Calcoco1:ENSMUST00000023818.10	0.128571	0.124183	0.236334	0.00444444	0.116279	0.098434	0.0184136	0.0223881	0.0140105	0.00407056	0.00289296	0.0147059	0.0218121
Fgf12:ENSMUST00000100024.2	0.310653	0.352976	0.408816	0.168009	0.179075	0.261506	0.25963	0.316652	0.180892	0.0687745	0.118955	0.252739	0.104394
Taok3:ENSMUST00000092889.11	0.31771	0.385728	0.470231	0.374768	0.336594	0.308024	0.342267	0.396728	0.4115	0.450814	0.495878	0.45215	0.462297
Amd1:ENSMUST00000099945.5	0.501517	0.538644	0.61676	0.418581	0.336251	0.446838	0.42402	0.439522	0.436298	0.426245	0.409929	0.439699	0.466809
Rbmx:ENSMUST00000098470.8	0.609613	0.56948	0.676426	0.40221	0.451301	0.521271	0.513454	0.63738	0.706116	0.45361	0.605184	0.3427	0.45001
Rab3ip:ENSMUST00000020375.6	0.372318	0.307226	0.402042	0.254489	0.217893	0.308052	0.197361	0.233799	0.191696	0.180307	0.1779	0.183002	0.159841
Ppme1:ENSMUST00000032963.9	0.676166	0.609385	0.709457	0.604762	0.575824	0.417686	0.5745	0.36014	0.657895	0.442708	0.622093	0.627737	0.608511
Sec22b:ENSMUST00000029476.8	0.307692	0.471954	0.584555	0.191654	0.277372	0.523936	0.414486	0.613883	0.182491	0.20145	0.325725	0.0858311	0.138441
Sod2:ENSMUST00000007012.5	0.250744	0.349828	0.409756	0.128713	0.0931391	0.258336	0.253418	0.24732	0.0801071	0.0870162	0.0834098	0.0543311	0.060912
Chchd4:ENSMUST00000040835.8	0.828839	0.823284	0.903101	0.677905	0.931548	0.857611	0.754022	0.945816	0.809084	0.883044	0.81986	0.805502	0.854961
Ptrhd1:ENSMUST00000179139.2	0.491776	0.487232	0.539598	0.540426	0.305344	0.384388	0.361194	0.344737	0.65053	0.492776	0.429722	0.35023	0.474511
Fam122a:ENSMUST00000099556.1	0.082183	0.112603	0.155454	0.089933	0.0848028	0.0936848	0.0972604	0.107411	0.115539	0.100496	0.114411	0.0934974	0.102466
Ttc9:ENSMUST00000218362.1	0.713638	0.684955	0.763515	0.733698	0.681548	0.687411	0.564684	0.584571	0.274967	0.218115	0.183414	0.244876	0.465912
Pcsk2:ENSMUST00000028905.9	0.377143	0.527291	0.656942	0.550661	0.408247	0.493845	0.504717	0.411765	0.2375	0.228155	0.198225	0.236842	0.597015
Fam3c:ENSMUST00000165576.7	0.169231	0.320778	0.375473	0.215971	0.130293	0.254854	0.206948	0.35443	0.415445	0.321798	0.268241	0.175862	0.157156
Smim13:ENSMUST00000165561.3	0.73913	0.764045	0.857054	0.711968	0.580645	0.650185	0.715249	0.818182	0.743873	0.689573	0.715553	0.590278	0.631098
Adam23:ENSMUST00000087374.9	0.61157	0.72029	0.761935	0.488128	0.673497	0.634875	0.591768	0.668509	0.635189	0.610002	0.649462	0.833117	0.750296
Nrip3:ENSMUST00000041460.12	0.410557	0.478983	0.599603	0.482676	0.504065	0.406879	0.49548	0.536145	0.5	0.343137	0.572115	0.461538	0.435644
Cited2:ENSMUST00000038107.8	0.367954	0.429594	0.560406	0.346405	0.391644	0.414598	0.415983	0.512453	0.380586	0.178033	0.35952	0.377687	0.345196
Fam81a:ENSMUST00000034749.15	0.458465	0.392921	0.5069	0.38153	0.368107	0.371768	0.361208	0.371631	0.500258	0.417092	0.420629	0.412225	0.462548
Zfp444:ENSMUST00000108567.8	0.201744	0.292243	0.335729	0.131833	0.143735	0.197563	0.16997	0.253479	0.124711	0.0961373	0.118227	0.0274478	0.0405502
Ypel2:ENSMUST00000018571.4	0.666667	0.834025	0.888088	0.696809	0.503704	0.719258	0.750395	0.787879	0.79085	0.637681	0.712574	0.686047	0.697479
Dhx36:ENSMUST00000029336.5	0.553672	0.533019	0.626316	0.541126	0.440559	0.641043	0.406103	0.61465	0.496104	0.446499	0.449796	0.352113	0.510256
Slc25a16:ENSMUST00000044977.9	0.680328	0.767273	0.803462	0.740909	0.490196	0.570562	0.678745	0.665653	0.733062	0.677355	0.752887	0.787234	0.763374
Slc38a1:ENSMUST00000088454.12	0.635025	0.727924	0.745527	0.48729	0.560558	0.58558	0.598826	0.596536	0.638383	0.48541	0.537549	0.318987	0.551287
Fam3a:ENSMUST00000114143.9	0.290909	0.284698	0.333753	0.133603	0.168	0.270374	0.144612	0.12	0.0730519	0.0326832	0.0609695	0.0112202	0.041958
Pdpk1:ENSMUST00000102927.9	0.45962	0.631082	0.705652	0.477625	0.377795	0.555958	0.565659	0.722192	0.537746	0.609621	0.577381	0.446654	0.51237
AI593442:ENSMUST00000213937.1	0.816004	0.795451	0.885852	0.751225	0.591202	0.679156	0.764205	0.578575	0.801115	0.651487	0.835178	0.852977	0.771982
Tsn:ENSMUST00000027623.8	0.285469	0.411382	0.452577	0.255307	0.223761	0.331607	0.290471	0.424387	0.381946	0.332661	0.286819	0.235986	0.259249
Scn1a:ENSMUST00000112366.7	0.549296	0.554839	0.685905	0.490446	0.518325	0.564588	0.530617	0.705882	0.648438	0.304348	0.449438	0.526316	0.46
Ptpra:ENSMUST00000028769.13	0.244186	0.202692	0.277191	0.140825	0.177986	0.139055	0.12802	0.053553	0.128423	0.0756686	0.173953	0.120323	0.144059
Scnm1:ENSMUST00000172572.8	0.717949	0.517588	0.627434	0.595588	0.710623	0.411612	0.496393	0.410112	0.589971	0.392601	0.566956	0.589212	0.596172
Asrgl1:ENSMUST00000049948.5	0.260945	0.355097	0.414729	0.207201	0.182241	0.307619	0.259722	0.324359	0.415412	0.259632	0.225048	0.190742	0.279176
Clcn4:ENSMUST00000000619.7	0.447619	0.568677	0.627214	0.373563	0.51462	0.495949	0.491939	0.698951	0.516375	0.491565	0.622985	0.293612	0.459002
Gpr12:ENSMUST00000036211.7	0.318431	0.328139	0.382457	0.188146	0.187885	0.241463	0.238748	NA	0.353968	0	0.237168	0.0677286	0.347689
Csrnp3:ENSMUST00000122912.7	0.790502	0.7787	0.807288	0.740791	0.680903	0.746039	0.574807	0.760576	0.734876	0.729706	0.744648	0.691389	0.716107
Eif1ax:ENSMUST00000087143.6	0.464022	0.468915	0.55948	0.149913	0.249509	0.453015	0.458941	0.389444	0.287867	0.14863	0.105875	0.112281	0.0892043
Dlgap4:ENSMUST00000000094.13	0.442561	0.569231	0.617124	0.238073	0.571429	0.477509	0.498964	0.543779	0.38123	0.285898	0.417279	0.194487	0.269362
Pdp1:ENSMUST00000108297.2	0.653226	0.587084	0.734737	0.418699	0.589041	0.631464	0.602338	0.371166	0.506122	0.327325	0.594203	0.555556	0.43038
Nup50:ENSMUST00000165443.3	0.780858	0.705888	0.752933	0.611058	0.554915	0.746019	0.556204	0.653196	0.684251	0.489609	0.447355	0.345236	0.6136
Atpaf1:ENSMUST00000176047.7	0.336538	0.489655	0.568966	0.228782	0.418605	0.467686	0.43507	0.347561	0.34753	0.227373	0.201187	0.117318	0.170732
Stum:ENSMUST00000136521.1	0.656411	0.625843	0.768416	0.483514	0.368771	0.441977	0.617564	0.846509	0.568219	0.849063	0.666848	0.258501	0.311735
Rexo2:ENSMUST00000217037.1	0.531915	0.652174	0.769552	0.47619	0.577778	0.6229	0.653863	0.418567	0.303779	0.204893	0.304135	0.303226	0.240481
Gabra4:ENSMUST00000031121.9	0.571429	0.6	0.726782	0.642458	0.5	0.494936	0.610913	0.285714	0.617195	0.678571	0.617647	0.642857	0.577778
Apbb2:ENSMUST00000162366.7	0.368132	0.401929	0.461249	0.282468	0.305936	0.427948	0.304997	0.551402	0.382909	0.456086	0.380527	0.449275	0.466518
Synj2bp:ENSMUST00000163402.7	0.489104	0.361862	0.419296	0.199396	0.232417	0.319166	0.280701	0.217944	0.282895	0.182489	0.0965438	0.11274	0.147445
Snrpb2:ENSMUST00000008477.12	0.110387	0.29959	0.339801	0.0852156	0.426201	0.25931	0.206552	0.186161	0.122847	0.0974937	0.119653	0.102148	0.0966047
Bdh1:ENSMUST00000115227.9	0.553508	0.389643	0.560437	0.480863	0.277311	0.34643	0.429644	0.301123	0.362683	0.304322	0.593389	0.334619	0.490994
Rab18:ENSMUST00000234810.1	0.514413	0.692983	0.710254	0.651007	0.57503	0.713045	0.486042	0.719848	0.739291	0.635128	0.737356	0.64857	0.651602
Mpv17l:ENSMUST00000128757.7	0.273132	0.303358	0.293121	0.270159	0.237401	0.277389	0.288165	0.389801	0.247282	0.305903	0.27667	0.311023	0.328595
Rbfox1:ENSMUST00000056416.8	0.441296	0.598664	0.636916	0.337543	0.427957	0.495841	0.505785	0.525371	0.395413	0.457932	0.544807	0.479198	0.433864
Commd1b:ENSMUST00000160826.1	0.954545	0.784017	0.832251	0.714286	0.679389	0.663004	0.700824	0.717165	0.651639	0.6787	0.717024	0.732414	0.714119
Nap1l1:ENSMUST00000065917.15	0.405622	0.473082	0.583202	0.344767	0.40752	0.507046	0.467053	0.459675	0.399614	0.38926	0.433563	0.37243	0.384238
Ndufaf4:ENSMUST00000029925.9	0.56191	0.599369	0.65202	0.552461	0.478452	0.528795	0.548924	0.484505	0.533752	0.446111	0.491948	0.397722	0.464381
St8sia3:ENSMUST00000025477.14	0.696429	0.857864	0.881291	0.598784	0.767442	0.808757	0.737822	0.795107	0.650602	0.622642	0.424074	0.666667	0.571429
Adcy9:ENSMUST00000117801.7	0.534161	0.615616	0.684408	0.477273	0.553922	0.596786	0.553251	0.555556	0.591195	0.429487	0.619048	0.560976	0.607742
Pakap:ENSMUST00000102903.7	0.501694	0.567146	0.648139	0.475014	0.390899	0.538215	0.510828	0.467764	0.444026	0.455793	0.380054	0.530966	0.479698
Kras:ENSMUST00000111710.7	0.417983	0.533969	0.547643	0.37812	0.359143	0.447977	0.461525	0.663342	0.454199	0.425968	0.424788	0.257623	0.325338
Gpr26:ENSMUST00000045840.4	0.838259	0.698882	0.787147	0.679369	0.399207	0.704462	0.662824	NA	NA	NA	NA	0.660615	0.662147
Rtn1:ENSMUST00000078505.13	0.452587	0.576615	0.601838	0.374853	0.418545	0.349292	0.52279	0.56203	0.506958	0.435973	0.402951	0.477593	0.499419
Serinc3:ENSMUST00000017851.3	0.185507	0.316456	0.386473	0.164671	0.251397	0.273772	0.260465	0.109195	0.167186	0.061431	0.233771	0.0748541	0.211883
Bbs4:ENSMUST00000026265.7	0.641509	0.72774	0.791024	0.615616	0.565789	0.65136	0.676025	0.74359	0.721137	0.64881	0.582505	0.638554	0.662461
Gnaz:ENSMUST00000037813.4	0.447154	0.572174	0.58641	0.378194	0.339344	0.433962	0.461996	0.348394	0.423664	0.284091	0.460952	0.410714	0.551282
Ebna1bp2:ENSMUST00000030501.14	0.270588	0.307353	0.350602	0.111881	0.146018	0.231711	0.249186	0.288889	0.127726	0.0714056	0.0748858	0.0380952	0.0400118
Epm2aip1:ENSMUST00000060711.7	0.963563	0.935223	0.941771	0.895735	0.915441	0.951874	0.683439	0.99115	0.938114	0.949315	0.947097	0.696629	0.935264
Arhgap32:ENSMUST00000174641.7	0.789855	0.831006	0.885163	0.79562	0.71123	0.76739	0.759614	0.716738	0.771134	0.718074	0.761032	0.685393	0.75
Rab39b:ENSMUST00000033545.5	0.572753	0.656164	0.706057	0.449651	0.474713	0.56636	0.60793	0.675561	0.49932	0.428555	0.545892	0.519219	0.472574
Atxn7l3b:ENSMUST00000099276.3	0.288899	0.375107	0.452133	0.288661	0.264193	0.308831	0.345948	0.404141	0.371846	0.357009	0.353729	0.274769	0.32389
Pitpnm2:ENSMUST00000086123.10	0.940807	0.778342	0.804626	0.818012	0.745789	0.822736	0.642912	0.970604	0.889262	0.917194	0.757841	0.617181	0.920801
Bfar:ENSMUST00000023365.12	0.439024	0.50995	0.52459	0.347239	0.302491	0.400759	0.400413	0.44473	0.422	0.37361	0.428636	0.320922	0.392051
Zfp386:ENSMUST00000183125.1	0.294298	0.201853	0.238103	0.0576062	0.09322	0.0968977	0.117432	0.383515	0.292232	0.270999	0.256362	0.0590189	0.164667
Mrpl45:ENSMUST00000019026.9	0.165541	0.228758	0.258983	0.123077	0.116822	0.170005	0.115344	0.111111	0.0997096	0.0964912	0.173045	0.0841584	0.081571
Kcnd2:ENSMUST00000081542.5	0.534713	0.648306	0.711448	0.621426	0.499995	0.609813	0.579631	0.721426	0.643618	0.622713	0.710109	0.609416	0.757279
Elovl4:ENSMUST00000034796.13	0.708333	0.716912	0.767537	0.662088	0.64467	0.584318	0.672677	0.666667	0.635548	0.576132	0.563487	0.785714	0.606061
Ptrh2:ENSMUST00000108022.7	0.197674	0.208333	0.273243	0.165591	0.116667	0.160714	0.143303	0.263158	0.365079	0.16145	0.20582	0.0539568	0.161027
Adgrl1:ENSMUST00000141158.7	0.503669	0.596639	0.65683	0.525663	0.551587	0.567794	0.529036	0.540963	0.492556	0.513216	0.541432	0.536458	0.553191
Plppr4:ENSMUST00000061071.12	0.268759	0.356488	0.435834	0.337021	0.16295	0.315481	0.318537	0.375786	0.316745	0.402325	0.265583	0.285088	0.276923
St13:ENSMUST00000172107.7	0.354586	0.472721	0.480977	0.159702	0.319653	0.445092	0.369107	0.455519	0.162431	0.214994	0.150221	0.0839072	0.10433
Sstr1:ENSMUST00000044299.2	0.733333	0.664122	0.659538	0.474747	0.613333	0.48896	0.552538	0.718808	0.552239	0.455782	0.547619	0.529412	0.269231
Brd3:ENSMUST00000028282.14	0.297437	0.336972	0.391717	0.227173	0.143745	0.207492	0.264612	0.343584	0.301135	0.257491	0.261445	0.205707	0.256584
Mul1:ENSMUST00000044058.10	0.47234	0.403442	0.445411	0.471014	0.2	0.283903	0.332861	0.462857	0.413468	0.41	0.450404	0.286325	0.369193
Prkce:ENSMUST00000097275.8	0.509456	0.614315	0.676163	0.585149	0.520249	0.568508	0.555842	0.597091	0.447861	0.570256	0.520085	0.374046	0.48999
Ablim2:ENSMUST00000054598.11	0.710981	0.650256	0.690883	0.582411	0.656843	0.674189	0.551658	0.54148	0.472456	0.474525	0.436137	0.590608	0.530865
Rragd:ENSMUST00000098190.9	0.498259	0.495922	0.555699	0.454855	0.390249	0.456858	0.45413	0.513599	0.47119	0.422999	0.472335	0.477833	0.427414
Ier5l:ENSMUST00000065134.3	0.75	0.226562	0.282767	0.303571	0.173913	0.128585	0.173569	0.483871	0.24952	0.369681	0.291667	0.0652174	0.307927
Keap1:ENSMUST00000194542.5	0.513498	0.635395	0.691609	0.466361	0.488725	0.573428	0.589318	0.440677	0.56167	0.37054	0.55124	0.439264	0.5531
Cuedc1:ENSMUST00000018522.12	0.464516	0.708929	0.707218	0.529046	0.439739	0.626479	0.58646	0.574179	0.600049	0.489246	0.575888	0.590909	0.536836
Mettl7a1:ENSMUST00000231166.1	0.609272	0.890625	0.899543	0.71028	0.774648	0.827586	0.783884	0.633166	0.906571	0.841291	0.855578	0.97486	0.924242
Maip1:ENSMUST00000027114.5	0.230159	0.25969	0.31018	0.0858369	0.168831	0.192456	0.211958	0.207407	0.0725995	0.0464865	0.0851716	0.017316	0.0352113
Nap1l1:ENSMUST00000219961.1	0.357143	0.31201	0.334495	0.121673	0.00315457	0.345175	0.184476	0.386935	0.193309	0.38986	0.2	0.210145	0.163987
Dact2:ENSMUST00000053218.6	0.1875	0.372263	0.352866	0.240741	0.378947	0.263473	0.232653	0.0625	0.262136	0.222222	0.210526	0.266667	0.333333
Cntnap2:ENSMUST00000114641.7	0.522439	0.42853	0.573038	0.198834	0.265349	0.382993	0.529318	0.483444	0.126061	0.265484	0.478682	0.52932	0.170273
Ublcp1:ENSMUST00000102795.3	0.692872	0.723422	0.80925	0.734893	0.52854	0.696861	0.694753	0.748366	0.782862	0.742047	0.719604	0.653835	0.686635
Ccdc71:ENSMUST00000061209.6	0.378788	0.27248	0.319777	0.28223	0.21547	0.224599	0.182491	0.284884	0.238619	0.224638	0.202873	0.20178	0.218467
Cacng4:ENSMUST00000021066.3	0.559322	0.512116	0.569555	0.475763	0.415584	0.555125	0.395118	0.513002	0.462617	0.481247	0.434146	0.375	0.421384
Ggps1:ENSMUST00000170957.2	0.487447	0.462104	0.488207	0.378349	0.429761	0.449517	0.358899	0.514605	0.484132	0.42679	0.330158	0.321747	0.37646
Cxxc5:ENSMUST00000060722.7	0.679954	0.829932	0.856246	0.73743	0.675949	0.751789	0.742308	0.70948	0.775448	0.622242	0.724902	0.705109	0.738095
Glg1:ENSMUST00000169020.7	0.620206	0.644144	0.666506	0.527891	0.609452	0.590855	0.572401	0.676976	0.535587	0.615944	0.576633	0.433265	0.565306
Ppm1h:ENSMUST00000067918.11	0.817818	0.807329	0.855016	0.857882	0.778748	0.76235	0.731726	0.883975	0.645641	0.699995	0.578405	0.513325	0.541784
Tmed5:ENSMUST00000119437.7	0.157092	0.401452	0.435851	0.245323	0.283333	0.27478	0.365325	0.361577	0.340107	0.357364	0.411275	0.229265	0.262648
Sfxn1:ENSMUST00000021930.9	0.365416	0.484778	0.517702	0.302547	0.371548	0.365084	0.408598	0.593239	0.44741	0.392199	0.393166	0.253293	0.368772
Celsr2:ENSMUST00000090558.9	0.640244	0.709516	0.748398	0.604555	0.658869	0.650746	0.633395	0.589041	0.629112	0.570014	0.654079	0.684211	0.609929
Fstl1:ENSMUST00000114763.2	0.254545	0.450301	0.481243	0.327014	0.267606	0.377841	0.357143	0.574757	0.383445	0.450608	0.347826	0.444444	0.446111
Mapt:ENSMUST00000106992.9	0.612004	0.78116	0.792153	0.546676	0.601359	0.699826	0.662422	0.733049	0.581977	0.529579	0.598596	0.524969	0.548042
Elavl1:ENSMUST00000098950.5	0.74542	0.788603	0.781462	0.457068	0.57919	0.706345	0.701799	0.601942	0.272831	0.263714	0.550467	0.244908	0.248085
Tmem33:ENSMUST00000037918.11	0.474331	0.513259	0.631768	0.343778	0.37644	0.517897	0.534413	0.389216	0.207681	0.192594	0.28788	0.106062	0.13884
Dedd2:ENSMUST00000058702.6	0.251701	0.264957	0.332963	0.290323	0.190476	0.268642	0.203204	0.347826	0.285714	0.286533	0.206699	0.116071	0.139764
Chn2:ENSMUST00000203091.2	0.685328	0.7792	0.840954	0.680597	0.733333	0.740181	0.752502	0.56	0.663317	0.424658	0.659296	0.347541	0.318527
Id2:ENSMUST00000221761.1	0.676806	0.676301	0.703596	0.609044	0.508475	0.541941	0.643401	0.73406	0.687902	0.590177	0.678344	0.638232	0.651662
Zfp704:ENSMUST00000041124.12	0.619996	0.71703	0.738755	0.682317	0.635962	0.59506	0.630939	0.739052	0.600065	0.713941	0.557562	0.582185	0.641926
Rpp30:ENSMUST00000025714.8	0.5	0.573034	0.743274	0.589744	0.810427	0.658604	0.643528	0.653333	0.666239	0.602792	0.650774	0.67801	0.661127
Trappc13:ENSMUST00000144060.7	0.479926	0.407291	0.414907	0.28165	0.250804	0.372113	0.326114	0.456503	0.37463	0.332872	0.300072	0.252993	0.2834
Ptpre:ENSMUST00000211140.1	0.505576	0.623888	0.675477	0.551498	0.542919	0.622943	0.542436	NA	0.576383	0.535486	0.634227	0.474083	0.548039
Lias:ENSMUST00000031101.9	0.0972097	0.149528	0.155588	0.111958	0.0892903	0.130186	0.114862	0.175776	0.125412	0.131706	0.134273	0.128664	0.0911211
Caln1:ENSMUST00000111288.3	0.268478	0.323865	0.406821	0.270135	0.220967	0.248054	0.326925	0.18894	0.272142	0.205683	0.307703	0.22335	0.220255
Ppp1r14c:ENSMUST00000043374.6	0.733456	0.729585	0.757486	0.741722	0.586538	0.620513	0.636669	0.691111	0.757269	0.751445	0.664756	0.576923	0.723926
Tagap:ENSMUST00000036370.7	0.75463	0.762871	0.845281	0.774436	0.706422	0.739194	0.736687	0.526829	0.82808	0.627451	0.805812	0.658976	0.725681
Sumo3:ENSMUST00000020501.14	0.967573	0.950941	0.969867	0.967009	0.940758	0.963672	0.800317	0.973797	0.956135	0.950695	0.937542	0.913242	0.896683
Eny2:ENSMUST00000060652.4	0.261905	0.25106	0.366221	0.15304	0.18239	0.285714	0.273549	0.23788	0.192308	0.0763759	0.167448	0.0652778	0.0414822
Hnrnpul2:ENSMUST00000096753.4	0.666632	0.797977	0.798257	0.566448	0.72493	0.721709	0.683008	0.676399	0.575382	0.469225	0.606243	0.4501	0.456448
Ran:ENSMUST00000031383.13	0.177198	0.3085	0.31335	0.0555556	0.195779	0.189357	0.249558	0.272631	0.128763	0.108252	0.13989	0.0897022	0.0755057
Bet1l:ENSMUST00000026557.9	0.423554	0.395448	0.512831	0.4022	0.49177	0.399947	0.408727	0.425486	0.45568	0.452147	0.443813	0.375	0.488046
Gabrg2:ENSMUST00000070725.10	0.589833	0.622435	0.687019	0.632784	0.573975	0.603404	0.568781	0.417925	0.645664	0.571928	0.637953	0.476801	0.569625
Fam217b:ENSMUST00000094251.10	0.549618	0.687342	0.690454	0.515625	0.687861	0.544276	0.592665	0.636364	0.650706	0.6	0.5	0.458904	0.655303
Elovl6:ENSMUST00000071402.6	0.518879	0.592631	0.629499	0.481512	0.444085	0.55214	0.540357	0.553992	0.529161	0.498757	0.56671	0.564443	0.525717
Csnk1e:ENSMUST00000117786.7	0.493785	0.653203	0.683177	0.500583	0.499389	0.594881	0.574088	0.661175	0.596454	0.613707	0.626904	0.438478	0.624734
Mplkip:ENSMUST00000049744.3	0.0439595	0.150725	0.246655	0.09217	0.0971766	0.157461	0.170071	0.318314	0.0862573	0.183427	0.0731658	0.0670732	0.065594
Rnf6:ENSMUST00000161859.7	0.569072	0.558011	0.66052	0.465164	0.451613	0.460727	0.597642	0.631016	0.539251	0.638209	0.41862	0.617021	0.634641
Thoc3:ENSMUST00000026990.5	0.184049	0.327389	0.380605	0.239779	0.266846	0.298073	0.275175	0.396761	0.226804	0.316	0.261335	0.170843	0.23607
Zc3h11a:ENSMUST00000191896.5	0.383701	0.547594	0.576258	0.494413	0.418803	0.498528	0.465161	0.706767	0.439401	0.672288	0.576657	0.439072	0.575093
Ntm:ENSMUST00000075069.10	0.407824	0.538271	0.588379	0.449567	0.417292	0.4855	0.492377	0.545977	0.44193	0.443897	0.373164	0.290584	0.375076
Fndc5:ENSMUST00000102600.3	0.486184	0.463617	0.556395	0.466205	0.358392	0.463272	0.437429	0.157258	0.533205	0.244845	0.4047	0.34375	0.360784
Ahdc1:ENSMUST00000105916.7	0.690554	0.71874	0.733595	0.676445	0.693216	0.699129	0.700795	0.756084	0.599044	0.715864	0.682339	0.68622	0.651859
Elavl4:ENSMUST00000106598.7	0.402698	0.444124	0.468043	0.216498	0.272574	0.319275	0.39654	0.505048	0.329317	0.466398	0.385583	0.243378	0.35588
Dnaja1:ENSMUST00000164233.7	0.508316	0.635859	0.676106	0.422561	0.546438	0.621141	0.577576	0.530816	0.496451	0.333995	0.479391	0.3196	0.21941
Nceh1:ENSMUST00000046515.14	0.696663	0.767599	0.794366	0.682298	0.68367	0.643706	0.70684	0.71185	0.658066	0.58163	0.615258	0.444313	0.585856
Dab1:ENSMUST00000106830.8	0.325191	0.400592	0.439557	0.309833	0.376285	0.358799	0.328437	NA	NA	NA	NA	NA	NA
Camk2g:ENSMUST00000100837.10	0.491582	0.67804	0.718293	0.490953	0.581665	0.599206	0.622407	0.566855	0.577616	0.445637	0.511268	0.458498	0.497089
Styx:ENSMUST00000226873.1	0.159091	0.16041	0.281139	0.148571	0.127389	0.161638	0.19313	0.307692	0.204607	0.238179	0.158923	0.143617	0.170703
Dcun1d1:ENSMUST00000178098.7	0.284115	0.362475	0.400094	0.28031	0.265901	0.327324	0.340596	0.356711	0.341158	0.269009	0.321676	0.219208	0.28208
Rgs2:ENSMUST00000127206.7	0.328035	0.448625	0.451573	0.354683	0.372401	0.394096	0.389217	0.341831	0.390761	0.318094	0.364649	0.324404	0.334077
Psmd8:ENSMUST00000209034.1	0.744394	0.75324	0.797305	0.725658	0.793979	0.684556	0.744636	0.588453	0.740536	0.60849	0.719639	0.666203	0.681586
Metap2:ENSMUST00000047910.14	0.327851	0.359789	0.388238	0.203552	0.208135	0.303363	0.288713	0.271479	0.240918	0.196243	0.213384	0.175303	0.204929
Mfhas1:ENSMUST00000037666.5	0.536842	0.585	0.594441	0.404444	0.438017	0.555105	0.469751	0.551867	0.518354	0.537383	0.598131	0.495495	0.569186
Plpbp:ENSMUST00000209525.1	0.710938	0.885714	0.933333	0.795222	0.873016	0.799252	0.842776	0.832579	0.910236	0.907005	0.934498	0.803077	0.930499
Bzw1:ENSMUST00000050552.14	0.764322	0.767162	0.806697	0.569991	0.754725	0.77969	0.737019	0.665498	0.659067	0.612993	0.711706	0.582803	0.570621
Rab2b:ENSMUST00000022765.13	0.736111	0.852	0.880822	0.76834	0.739837	0.747423	0.795548	0.881633	0.845475	0.866755	0.814371	0.769231	0.749296
Ube2l3:ENSMUST00000232139.1	0.49865	0.492878	0.542398	0.301349	0.413909	0.478113	0.426324	0.56948	0.542967	0.388926	0.415947	0.269448	0.326189
Pgd:ENSMUST00000084124.6	0.37069	0.246554	0.153153	0.0416667	0.203252	0.0760369	0.355115	0.0358744	0.0970797	0.0425532	0.0788991	0.0198347	0.0306122
Ift20:ENSMUST00000128788.7	0.249844	0.283111	0.248523	0.386032	0.406505	0.317881	0.354788	0.176883	0.317879	0.205087	0.298492	0.333523	0.33926
Tubb2b:ENSMUST00000075774.4	0.557025	0.434015	0.356615	0.844944	0.469955	0.238464	0.218392	0.499825	0.706519	0.476091	0.77997	0.314063	0.419704
Emc1:ENSMUST00000179784.8	0.13593	0.312099	0.182604	0.296365	0.231442	0.171722	0.276464	0.400847	0.465017	0.51834	0.261051	0.501011	0.586234
Slc25a1:ENSMUST00000003622.15	0.947368	0.941109	0.80315	0.92963	0.892308	0.797882	0.962555	0.936385	0.908838	0.959516	0.86465	0.868217	0.849511
Snx2:ENSMUST00000037850.6	0.878924	0.841845	0.762257	0.919732	0.939683	0.937916	0.84923	0.428044	0.85589	0.66776	0.705538	0.802711	0.881143
Esyt2:ENSMUST00000100986.3	0.482454	0.421554	0.498137	0.455804	0.395422	0.532482	0.561041	0.278185	0.317577	0.274448	0.300538	0.376966	0.292741
Commd7:ENSMUST00000071852.9	0.395833	0.605366	0.45583	0.244937	0.460245	0.324993	0.666244	0.027972	0.434422	0.153465	0.468627	0.0613811	0.0758245
Uqcrc2:ENSMUST00000033176.6	0.40829	0.432243	0.343022	0.446891	0.396752	0.293704	0.553494	0.134085	0.387904	0.194478	0.37072	0.415876	0.346117
Gap43:ENSMUST00000102817.4	0.859453	0.779756	0.699697	0.855523	0.856751	0.844857	0.858097	0.716969	0.783422	0.702162	0.786416	0.826087	0.79798
Nip7:ENSMUST00000034392.12	0.228093	0.247704	0.227688	0.184113	0.0875367	0.159233	0.428032	0.152729	0.178779	0.0819381	0.103945	0.0651794	0.0556315
Aars:ENSMUST00000034441.7	0.506849	0.415559	0.33225	0.509488	0.39281	0.397349	0.564415	0.423762	0.402423	0.506977	0.427437	0.40608	0.726874
Ndufb5:ENSMUST00000127477.7	0.366765	0.268158	0.152419	0.288193	0.322809	0.378031	0.328562	0.158096	0.223799	0.205715	0.284913	0.244344	0.251878
H3f3b:ENSMUST00000106454.7	0.637935	0.529251	0.571198	0.695709	0.552131	0.628228	0.472677	0.570643	0.661918	0.700466	0.696533	0.632348	0.594052
Dynlt2b:ENSMUST00000080316.7	0.982684	0.692478	0.764391	0.932182	0.734139	0.738676	0.714286	0.578571	0.755086	0.670478	0.756692	0.734349	0.727339
Tmem128:ENSMUST00000087511.9	0.954315	0.729851	0.814708	0.962171	0.916201	0.65075	0.823456	0.983982	0.905378	0.955132	0.811894	0.876214	0.878004
Scp2:ENSMUST00000030340.14	0.486755	0.415372	0.374277	0.580982	0.544503	0.424533	0.399226	0.631068	0.705865	0.750711	0.756766	0.709759	0.596197
Cep170:ENSMUST00000057037.12	0.215612	0.263416	0.254773	0.126628	0.181914	0.329367	0.153229	0.313109	0.143536	0.145652	0.171953	0.119498	0.128948
Fyn:ENSMUST00000063091.12	0.2267	0.14787	0.176928	0.332176	0.188889	0.212006	0.152151	0.321522	0.329562	0.337294	0.30939	0.340136	0.27381
Mapkap1:ENSMUST00000113126.2	0.487013	0.364829	0.396968	0.571429	0.300813	0.429216	0.416618	0.545113	0.693274	0.554118	0.395756	0.424658	0.460969
Ndufa10:ENSMUST00000027478.6	0.340672	0.326173	0.363228	0.495635	0.333949	0.393238	0.358876	0.338978	0.354213	0.429538	0.320161	0.372872	0.324871
Brcc3:ENSMUST00000033544.13	0.474233	0.454611	0.458	0.440554	0.451753	0.429891	0.435966	0.435301	0.482928	0.416469	0.427801	0.408771	0.38841
Coa8:ENSMUST00000040519.11	0.504274	0.445283	0.506511	0.606557	0.328767	0.454625	0.4593	0.25	0.545616	0.451874	0.58528	0.640187	0.573529
Ccdc47:ENSMUST00000002043.9	0.36082	0.33965	0.330387	0.365026	0.306151	0.322476	0.324893	0.39755	0.389692	0.389857	0.373138	0.299564	0.355892
Coq5:ENSMUST00000040421.10	0.791617	0.533262	0.637806	0.753657	0.579779	0.584188	0.579493	0.622691	0.685728	0.681006	0.654464	0.689821	0.680772
Ptov1:ENSMUST00000046575.16	0.670398	0.639169	0.671287	0.720427	0.728379	0.531119	0.54532	0.51648	0.815485	0.655199	0.847151	0.807154	0.728246
Exosc4:ENSMUST00000059045.7	0.317734	0.158552	0.215272	0.372671	0.157407	0.218358	0.251681	0.321656	0.270293	0.339713	0.196542	0.272251	0.291258
Ykt6:ENSMUST00000002818.8	0.832335	0.538341	0.532742	0.61194	0.524917	0.604355	0.42316	0.891791	0.934358	0.930573	0.957293	0.906752	0.912331
Uqcc3:ENSMUST00000096253.6	0.449717	0.412579	0.434225	0.571971	0.506855	0.418768	0.451544	0.403524	0.408809	0.404109	0.416806	0.39012	0.36528
Cdc26:ENSMUST00000084525.11	0.355392	0.320353	0.323716	0.443216	0.35536	0.339327	0.285846	0.363032	0.222256	0.335815	0.258097	0.22045	0.160354
Pnn:ENSMUST00000021381.5	0.397059	0.339045	0.364419	0.462919	0.271523	0.368032	0.32458	0.386157	0.278555	0.37029	0.319064	0.295	0.30888
Cldnd1:ENSMUST00000023426.11	0.772973	0.70193	0.753775	0.794078	0.673953	0.618324	0.666692	0.648281	0.781903	0.761174	0.814635	0.822624	0.75529
Arpp21:ENSMUST00000178410.1	0.270026	0.246718	0.278429	0.230161	0.25906	0.219642	0.20201	0.576443	0.217666	0.289882	0.249052	0.156064	0.254967
Stk11:ENSMUST00000003152.13	0.786664	0.73378	0.657601	0.788381	0.772437	0.603954	0.6845	0.596198	0.66895	0.612355	0.704478	0.71877	0.676704
Dcaf12:ENSMUST00000030145.8	0.662587	0.729551	0.721866	0.752074	0.531112	0.672926	0.582871	0.718861	0.821706	0.740232	0.555076	0.640881	0.691307
Mapk8ip2:ENSMUST00000023291.5	0.387106	0.329945	0.302447	0.402286	0.293969	0.347261	0.265407	0.476017	0.26672	0.381243	0.202586	0.193113	0.162105
Dok4:ENSMUST00000212810.1	0.826415	0.770629	0.837932	0.957507	0.905254	0.832981	0.860499	0.908568	0.88369	0.906118	0.886938	0.788273	0.940965
Gm14419:ENSMUST00000108975.8	0.702703	0.678342	0.68158	0.79066	0.816206	0.64097	0.68573	0.792157	0.797238	0.805718	0.684975	0.748538	0.78438
Rpl7l1:ENSMUST00000078286.5	0.724295	0.659922	0.706583	0.682781	0.685722	0.661293	0.677491	0.730514	0.678319	0.708217	0.658726	0.692119	0.678328
Lyrm2:ENSMUST00000062802.4	0.533808	0.358524	0.369133	0.466186	0.324373	0.363887	0.346347	0.441894	0.484771	0.504419	0.488467	0.451258	0.454305
Sobp:ENSMUST00000040275.8	0.507018	0.448583	0.438437	0.593356	0.50165	0.5083	0.484832	0.42153	0.43031	0.469586	0.5269	0.384615	0.538742
Ube2w:ENSMUST00000117146.8	0.146384	0.151507	0.136246	0.130099	0.100806	0.141316	0.136903	0.153671	0.179157	0.121645	0.142498	0.0963045	0.112706
Marcks:ENSMUST00000092584.5	0.511851	0.408456	0.43603	0.5326	0.423737	0.393366	0.425873	0.416425	0.488087	0.549471	0.55358	0.513062	0.528908
Gm14434:ENSMUST00000120959.7	0.784816	0.772842	0.792371	0.814096	0.79392	0.768393	0.777347	0.678057	0.759216	0.67974	0.706289	0.745354	0.683197
Sox11:ENSMUST00000079063.6	0.749369	0.641756	0.668966	0.77411	0.625827	0.639811	0.657053	0.629603	0.724761	0.665471	0.709919	0.726499	0.745065
Cript:ENSMUST00000024959.9	0.677266	0.605898	0.657214	0.737698	0.711027	0.693265	0.604248	0.714628	0.604518	0.631655	0.710514	0.598205	0.570288
Nrp1:ENSMUST00000026917.9	0.339316	0.365005	0.407615	0.412463	0.30259	0.388231	0.366086	0.524761	0.371483	0.515549	0.415162	0.426343	0.450339
Osbpl9:ENSMUST00000084366.12	0.882759	0.777989	0.830946	0.901478	0.834197	0.794485	0.776882	0.848404	0.885675	0.898063	0.831492	0.846422	0.814919
Scrn1:ENSMUST00000019268.10	0.871245	0.943646	0.926113	0.79846	0.776978	0.893923	0.884389	0.841481	0.79302	0.611465	0.543799	0.760563	0.772152
Nme1:ENSMUST00000135884.7	0.272536	0.378792	0.372162	0.274409	0.374018	0.353855	0.386562	0.309553	0.233297	0.198071	0.168	0.219225	0.192624
Rgs17:ENSMUST00000131996.7	0.145635	0.121413	0.152495	0.0805273	0.0932959	0.105781	0.107009	0.178214	0.0913013	0.139398	0.113051	0.160277	0.115012
Prkra:ENSMUST00000002808.6	0.825397	0.869898	0.909639	0.776498	0.892562	0.887908	0.841516	0.836364	0.799552	0.739372	0.817664	0.760536	0.756852
Zrsr2:ENSMUST00000090840.9	0.162757	0.215736	0.220259	0.147567	0.152453	0.180705	0.184205	0.16401	0.179627	0.148468	0.185298	0.193945	0.0866474
Rbfox2:ENSMUST00000171751.9	0.493084	0.623872	0.569966	0.425449	0.314448	0.450365	0.533219	0.44134	0.624616	0.514686	0.504733	0.460714	0.61911
Arfrp1:ENSMUST00000170190.7	0.392224	0.329056	0.373849	0.292634	0.303652	0.340819	0.330469	0.316861	0.306666	0.294957	0.172555	0.337986	0.300121
Stau2:ENSMUST00000159558.7	0.59542	0.679321	0.646335	0.51405	0.510363	0.555894	0.624275	0.633333	0.569264	0.631285	0.657534	0.429487	0.587786
Glul:ENSMUST00000086199.11	0.851282	0.904382	0.914305	0.788978	0.850288	0.913977	0.854611	0.927367	0.872905	0.853971	0.881703	0.802391	0.791241
Dlat:ENSMUST00000034567.3	0.567941	0.575216	0.603249	0.445034	0.531583	0.554467	0.544217	0.560545	0.439464	0.423133	0.404798	0.381997	0.388975
Cand1:ENSMUST00000020315.12	0.432936	0.4152	0.466433	0.314856	0.401627	0.445528	0.387636	0.392338	0.191814	0.221642	0.298793	0.124884	0.175819
Dpp8:ENSMUST00000034960.13	0.922297	0.892514	0.882843	0.792712	0.896844	0.888988	0.88736	0.839582	0.828725	0.735774	0.73048	0.716239	0.809676
Marchf5:ENSMUST00000024078.14	0.277365	0.291806	0.289985	0.143133	0.148615	0.240237	0.247248	0.132842	0.242446	0.115123	0.1524	0.0741353	0.110809
Pnrc2:ENSMUST00000030436.11	0.124408	0.106991	0.140366	0.0912261	0.143421	0.115199	0.114848	0.151573	0.0633413	0.116315	0.0591338	0.0630658	0.0635748
Pmpca:ENSMUST00000076431.12	0.78751	0.692858	0.738084	0.632643	0.664479	0.679413	0.713145	0.721239	0.589246	0.589059	0.739768	0.547484	0.617076
Eif3c:ENSMUST00000032992.6	0.541528	0.279156	0.350406	0.234244	0.304348	0.330285	0.340993	0.342723	0.211696	0.166486	0.134092	0.11039	0.151982
Cnot8:ENSMUST00000108843.7	0.888889	0.880319	0.893375	0.782132	0.846774	0.840643	0.904549	0.883019	0.790766	0.770965	0.802588	0.71358	0.669638
Mdp1:ENSMUST00000002400.6	0.802691	0.837179	0.846859	0.736931	0.788571	0.818921	0.854435	0.825743	0.73773	0.653343	0.695269	0.689591	0.647059
Klf7:ENSMUST00000114086.7	0.229214	0.335173	0.362909	0.255567	0.250897	0.277613	0.316968	0.419254	0.303184	0.333331	0.299871	0.265482	0.30194
Gnb1:ENSMUST00000165335.7	0.938758	0.947549	0.953224	0.833799	0.904762	0.938087	0.937593	0.90602	0.803947	0.667121	0.708564	0.610435	0.560478
Prkar1a:ENSMUST00000106677.7	0.830444	0.889866	0.899246	0.753902	0.696029	0.859228	0.829774	0.888187	0.563946	0.656107	0.628813	0.536018	0.468965
Csnk2a1:ENSMUST00000099224.9	0.758743	0.82031	0.808801	0.669922	0.655768	0.722845	0.768239	0.787661	0.848413	0.850819	0.839995	0.816742	0.856186
Acp1:ENSMUST00000062740.14	0.581782	0.56342	0.597775	0.523926	0.557076	0.563065	0.643777	0.659028	0.660904	0.590781	0.517239	0.433243	0.475395
Mapre1:ENSMUST00000028981.8	0.29245	0.393267	0.4141	0.243179	0.289592	0.366756	0.340921	0.293207	0.270997	0.22138	0.204327	0.179254	0.260396
Psmd5:ENSMUST00000028225.11	0.155891	0.303915	0.294573	0.152602	0.19119	0.235695	0.246849	0.271422	0.140464	0.137914	0.116815	0.0960624	0.100881
Ndufa9:ENSMUST00000205002.2	0.182125	0.239422	0.225138	0.05365	0.1019	0.12142	0.156908	0.157044	0.0695334	0.0255176	0.0235712	0.00664137	0.0232274
Btbd1:ENSMUST00000026093.8	0.886179	0.865553	0.894052	0.765074	0.727979	0.850774	0.886854	0.828931	0.853846	0.739818	0.574355	0.528846	0.490804
Dynll2:ENSMUST00000178105.2	0.747729	0.836668	0.871568	0.710761	0.776926	0.806802	0.803705	0.804364	0.673601	0.718086	0.284153	0.645036	0.655953
Gatad2b:ENSMUST00000199754.4	0.662146	0.713996	0.738135	0.614255	0.620513	0.667324	0.702272	0.640095	0.714492	0.630536	0.679993	0.655672	0.687392
Gm20075:ENSMUST00000220449.1	0.35	0.27085	0.320517	0.201171	0.257627	0.335282	0.309429	0.30888	0.242958	0.237262	0.140816	0.152952	0.172548
Lsm14a:ENSMUST00000085585.11	0.429372	0.450129	0.472061	0.372045	0.539112	0.43884	0.445148	0.402161	0.398668	0.372089	0.393665	0.350197	0.371069
Tmem237:ENSMUST00000094917.9	0.579545	0.507962	0.473124	0.350211	0.501538	0.442435	0.459459	0.593052	0.461792	0.554529	0.453132	0.479695	0.475212
Mtch2:ENSMUST00000136872.7	0.161531	0.267778	0.284401	0.112096	0.155689	0.193241	0.227411	0.297003	0.174023	0.146065	0.129071	0.100775	0.088555
Btf3l4:ENSMUST00000102742.10	0.338983	0.25938	0.297219	0.197142	0.25144	0.338663	0.310613	0.324859	0.245789	0.256848	0.140589	0.154197	0.170262
Cops2:ENSMUST00000110463.7	0.482609	0.520338	0.545477	0.394035	0.443709	0.5	0.493516	0.511304	0.520478	0.407708	0.366559	0.313514	0.392
Srsf7:ENSMUST00000063417.10	0.409574	0.521895	0.534793	0.368532	0.367629	0.486053	0.476273	0.359246	0.253652	0.240106	0.254589	0.157986	0.164541
Nfix:ENSMUST00000076715.12	0.503261	0.658724	0.548209	0.476582	0.54517	0.59039	0.625388	0.825245	0.689815	0.828933	0.58559	0.425474	0.748043
Csnk1a1:ENSMUST00000165123.7	0.50221	0.436363	0.413927	0.285025	0.29562	0.438781	0.40388	0.573383	0.374336	0.334368	0.34616	0.131737	0.287347
Arfip2:ENSMUST00000131446.7	0.258741	0.364116	0.352923	0.178918	0.201946	0.286726	0.275636	0.309677	0.145613	0.137525	0.110188	0.0773196	0.14273
Nras:ENSMUST00000029445.12	0.707652	0.660658	0.732283	0.561785	0.667515	0.677045	0.694797	0.659212	0.715955	0.650753	0.662219	0.506241	0.568581
Psmd11:ENSMUST00000017572.13	0.243746	0.341501	0.378293	0.230558	0.248197	0.29952	0.297803	0.452376	0.290951	0.320921	0.273342	0.198329	0.233234
Arl4c:ENSMUST00000159814.1	0.639824	0.645717	0.643603	0.45485	0.413432	0.556007	0.477324	0.540359	0.474432	0.381844	0.399476	0.343706	0.321764
Bnip3l:ENSMUST00000111115.7	0.183943	0.344329	0.341632	0.142818	0.165638	0.212656	0.268869	0.391089	0.2187	0.231626	0.198195	0.131783	0.152261
Actr10:ENSMUST00000021479.5	0.273577	0.23472	0.269314	0.11894	0.177056	0.248012	0.237561	0.208302	0.134202	0.0840747	0.166432	0.0380895	0.0345638
Csnk1g3:ENSMUST00000069597.7	0.812977	0.788396	0.825916	0.694946	0.755435	0.833519	0.810587	0.714015	0.692787	0.580372	0.522049	0.425532	0.536603
Ppig:ENSMUST00000090858.9	0.482218	0.366373	0.465871	0.294444	0.385665	0.426824	0.423854	0.441954	0.397974	0.326059	0.133572	0.090811	0.157722
Snx27:ENSMUST00000029783.15	0.605085	0.728303	0.72295	0.551613	0.568195	0.627123	0.707214	0.566926	0.698862	0.531858	0.669688	0.604972	0.620249
Mrps14:ENSMUST00000135680.7	0.35229	0.480897	0.442448	0.325389	0.474168	0.46495	0.443252	0.331971	0.466546	0.322024	0.144645	0.374482	0.274751
Itfg1:ENSMUST00000034140.8	0.826268	0.827684	0.865286	0.710584	0.776713	0.846805	0.857727	0.756487	0.655414	0.54724	0.690691	0.356129	0.370747
Sf3b1:ENSMUST00000027127.13	0.329825	0.355993	0.349184	0.242123	0.275862	0.35386	0.379676	0.18328	0.170021	0.140039	0.129447	0.108911	0.120519
Mrpl35:ENSMUST00000065103.3	0.109791	0.272216	0.273804	0.0746949	0.105872	0.181269	0.162183	0.157789	0.0799411	0.0568966	0.111366	0.0384074	0.0374173
Ccnh:ENSMUST00000022030.10	0.542407	0.597906	0.542532	0.442079	0.579309	0.616152	0.569911	0.798815	0.535403	0.626677	0.523838	0.428686	0.490241
Slc25a51:ENSMUST00000107796.7	0.557971	0.680397	0.668512	0.552042	0.412979	0.618705	0.709087	0.603175	0.650828	0.597815	0.493531	0.595318	0.702082
Terf2ip:ENSMUST00000052138.10	0.441759	0.415075	0.425756	0.321876	0.341084	0.411818	0.458812	0.322386	0.477346	0.37443	0.437867	0.278713	0.358024
Rpp38:ENSMUST00000062672.6	0.868852	0.797659	0.839275	0.672101	0.668394	0.792308	0.787825	0.957492	0.690328	0.847098	0.488391	0.502463	0.602086
Sap30bp:ENSMUST00000140991.1	0.511628	0.462209	0.473346	0.301811	0.267016	0.415991	0.421578	0.481481	0.373321	0.401611	0.210405	0.325792	0.289079
Nudt3:ENSMUST00000025050.12	0.835979	0.917025	0.911883	0.739713	0.787946	0.855659	0.855578	0.903442	0.903678	0.873772	0.902664	0.886667	0.888645
Gm49804:ENSMUST00000233710.1	0.835979	0.917025	0.911883	0.739713	0.787946	0.855659	0.855578	0.903442	0.903678	0.873772	0.902664	0.886667	0.888645
Rhoa:ENSMUST00000007959.13	0.552	0.507569	0.518429	0.367691	0.408482	0.472415	0.493404	0.638586	0.431623	0.442274	0.202198	0.33589	0.288726
Ttc39c:ENSMUST00000234255.1	0.369781	0.227987	0.238874	0.105443	0.133636	0.262077	0.254763	0.102735	0.126589	0.0606209	0.0832903	0.0909091	0.0716973
Dut:ENSMUST00000051605.8	0.197465	0.198157	0.244369	0.107604	0.267176	0.192554	0.222417	0.138711	0.1271	0.110976	0.148289	0.108979	0.12249
Nars:ENSMUST00000237400.1	0.785867	0.832215	0.836382	0.686255	0.829825	0.800887	0.809221	0.824728	0.677452	0.740643	0.69305	0.640334	0.682747
Ube3a:ENSMUST00000200758.3	0.293904	0.443818	0.48596	0.292228	0.358575	0.434003	0.45306	NA	0.359899	0.323231	0.375738	0.247992	0.306526
Scarb2:ENSMUST00000031377.8	0.8	0.907104	0.915217	0.74026	0.767347	0.88899	0.821656	0.837553	0.73853	0.729727	0.653101	0.383585	0.674699
Dync1li2:ENSMUST00000041769.7	0.930594	0.952689	0.955138	0.869592	0.891075	0.947394	0.943997	0.939006	0.879504	0.805371	0.790305	0.778032	0.81381
Gad2:ENSMUST00000028123.3	0.865789	0.89578	0.889922	0.751004	0.866359	0.878763	0.883342	NA	0.855204	0.784314	0.833333	0.794118	0.864865
Tomm70a:ENSMUST00000166897.2	0.453226	0.442519	0.449421	0.373786	0.462931	0.464603	0.452644	0.434544	0.381992	0.344228	0.372213	0.25468	0.283435
Rufy3:ENSMUST00000031229.10	0.539695	0.554036	0.608702	0.463664	0.466101	0.64836	0.576611	0.49588	0.645416	0.525185	0.560201	0.650159	0.645873
Sucla2:ENSMUST00000160507.7	0.608696	0.507001	0.54371	0.41651	0.491501	0.548432	0.554222	0.451374	0.437264	0.419753	0.310187	0.383442	0.335381
Rtn3:ENSMUST00000088169.6	0.87955	0.915094	0.931779	0.792735	0.888043	0.913431	0.930345	NA	0.755776	0.658545	0.79135	0.601924	0.596136
Hnrnpd:ENSMUST00000172361.7	0.508368	0.528282	0.594377	0.364291	0.487959	0.5206	0.515725	0.314657	0.369897	0.245356	0.280861	0.242845	0.246581
Rac1:ENSMUST00000080537.13	0.798165	0.906934	0.913632	0.738591	0.804202	0.854831	0.863621	0.887169	0.899479	0.803843	0.859521	0.553957	0.680875
Macroh2a1:ENSMUST00000016081.12	0.655738	0.572426	0.653302	0.520772	0.521318	0.711357	0.653642	0.630442	0.647738	0.617332	0.639116	0.574722	0.58884
Pou2f1:ENSMUST00000111427.8	0.380711	0.353846	0.409091	0.189066	0.16	0.282458	0.277852	0.322751	0.397132	0.31405	0.38903	0.366013	0.376943
Tmod2:ENSMUST00000098552.9	0.362892	0.466624	0.505839	0.302944	0.29902	0.379224	0.435909	0.441213	0.39626	0.369707	0.274057	0.339806	0.350877
Tnfaip1:ENSMUST00000017759.8	0.529994	0.541628	0.588009	0.440734	0.5105	0.521039	0.542344	0.61089	0.587827	0.533584	0.443183	0.423798	0.55447
Sec14l1:ENSMUST00000090433.5	0.917995	0.906306	0.895971	0.772575	0.830882	0.850504	0.93235	0.889313	0.786105	0.737044	0.531592	0.756452	0.87474
Tbpl1:ENSMUST00000127698.7	0.520468	0.533645	0.625882	0.434906	0.340528	0.575513	0.559847	0.412245	0.449568	0.333333	0.247223	0.248913	0.31422
Sinhcaf:ENSMUST00000203164.2	1	0.997131	0.985312	0.836799	0.943429	0.969284	0.976074	0.930392	0.927919	0.911077	0.880726	0.834525	0.870463
Sipa1l1:ENSMUST00000222298.1	0.353982	0.420058	0.462278	0.317073	0.433333	0.439024	0.457118	0.43913	0.274306	0.292293	0.355372	0.260163	0.221709
Gdpd1:ENSMUST00000020804.7	0.90625	0.922078	0.928224	0.749444	0.755682	0.84119	0.886957	0.837766	0.893979	0.813793	0.808862	0.747191	0.719481
Samm50:ENSMUST00000023071.7	0.13467	0.220544	0.239904	0.0745798	0.131474	0.160339	0.227447	0.164486	0.0564815	0.0457716	0.0519856	0.0632911	0.0309917
Pja2:ENSMUST00000172818.7	0.553073	0.658527	0.660152	0.50687	0.619048	0.655024	0.635436	0.701626	0.518449	0.578779	0.566365	0.332673	0.546548
Klhl7:ENSMUST00000163409.4	0.307695	0.263633	0.292954	0.193749	0.251668	0.337791	0.334073	0.165499	0.142051	0.0731292	0.235721	0.046352	0.0791855
Etf1:ENSMUST00000025218.7	0.550014	0.761838	0.734526	0.539897	0.619775	0.640369	0.666373	0.67603	0.585337	0.494649	0.605015	0.486518	0.507594
Tmem70:ENSMUST00000065373.5	0.405512	0.431412	0.512318	0.328212	0.378125	0.474947	0.461991	0.36014	0.563397	0.481112	0.326563	0.360277	0.408046
Eif4g2:ENSMUST00000162415.8	0.330283	0.258073	0.280006	0.157861	0.322344	0.280414	0.316509	0.225315	0.408399	0.26424	0.353275	0.157875	0.244786
H2az2:ENSMUST00000109737.8	0.157651	0.141256	0.144497	0.0665371	0.188713	0.245557	0.226477	0.140678	0.177583	0.167636	0.19774	0.140488	0.105183
Pnisr:ENSMUST00000098238.8	0.527276	0.381001	0.415533	0.279872	0.329165	0.432747	0.432311	0.40958	0.284715	0.276926	0.269404	0.175512	0.195095
Mapre2:ENSMUST00000170802.7	0.689873	0.695	0.724703	0.537552	0.614304	0.64752	0.673212	0.617984	0.428785	0.388546	0.270931	0.312364	0.412305
Lmo3:ENSMUST00000162772.7	0.527955	0.505321	0.543705	0.310106	0.361229	0.41214	0.458963	0.195718	0.370934	0.351101	0.252316	0.500182	0.39964
Nol4:ENSMUST00000097651.9	0.814738	0.815742	0.800888	0.819966	0.813426	0.7949	0.832686	0.820361	0.836611	0.739322	0.795368	0.664299	0.807224
Srsf3:ENSMUST00000130216.2	0.612455	0.578697	0.627889	0.523651	0.566033	0.6068	0.634077	0.535172	0.474783	0.483557	0.500897	0.440704	0.435113
Pld3:ENSMUST00000117095.7	0.194444	0.133171	0.136292	0.0670017	0.199744	0.127741	0.250285	0.0853293	0.0553169	0.0107405	0.0234883	0.0241327	0.0313364
Cenpw:ENSMUST00000216853.1	0.164179	0.151316	0.19544	0.0628415	0.2	0.251748	0.20916	0.186813	0.128342	0.0764706	0.106312	0.0757576	0.0864198
Ufd1:ENSMUST00000005394.12	0.8	0.763371	0.804201	0.621418	0.762215	0.741247	0.777757	0.833333	0.623585	0.591894	0.590085	0.370056	0.446768
Ubl4a:ENSMUST00000155676.7	0.706767	0.579741	0.671376	0.511777	0.609091	0.620222	0.684675	0.723164	0.567688	0.40316	0.440949	0.274247	0.311041
Cmc1:ENSMUST00000044220.10	0.28189	0.304365	0.318722	0.146646	0.230575	0.253139	0.315972	0.308732	0.132853	0.152748	0.133334	0.107633	0.105586
Rbfox3:ENSMUST00000017576.10	0.699456	0.769184	0.760118	0.619784	0.763503	0.715658	0.796265	0.828379	0.626679	0.753393	0.748224	0.739667	0.682774
Rap1b:ENSMUST00000064667.8	0.597182	0.643279	0.619842	0.605199	0.600477	0.619661	0.592761	0.611364	0.591448	0.573727	0.577351	0.557129	0.545031
Ube2n:ENSMUST00000099329.4	0.243032	0.300799	0.34934	0.122584	0.152805	0.254297	0.261961	0.164823	0.131025	0.0538019	0.0405736	0.0554096	0.0545468
Ppp1r2:ENSMUST00000060188.13	0.226232	0.270852	0.27408	0.184319	0.210385	0.248705	0.245293	0.206503	0.179275	0.172572	0.201139	0.147501	0.153063
Oxct1:ENSMUST00000110690.8	0.586771	0.693062	0.714463	0.508183	0.519964	0.612645	0.665611	0.641247	0.618578	0.56097	0.567371	0.385174	0.574591
Zc3h14:ENSMUST00000110104.9	0.484305	0.592647	0.608803	0.38331	0.397638	0.563427	0.514388	0.463134	0.486217	0.398344	0.394279	0.390181	0.396859
Rtf2:ENSMUST00000029005.3	0.718876	0.699115	0.768132	0.57672	0.646199	0.683306	0.742136	0.680723	0.62571	0.552752	0.570614	0.579556	0.561203
Sdha:ENSMUST00000022062.7	0.658003	0.569358	0.62384	0.439165	0.573171	0.485115	0.63778	0.529204	0.401791	0.442697	0.505401	0.400517	0.399055
Arpc2:ENSMUST00000113820.8	0.7088	0.692216	0.738583	0.506919	0.673851	0.611695	0.656978	0.207356	0.696839	0.388239	0.688302	0.702304	0.714402
Etv1:ENSMUST00000095767.10	0.381479	0.29526	0.380206	0.217922	0.181835	0.330917	0.384141	0.375109	0.284934	0.281155	0.107244	0.291496	0.346806
Utp11:ENSMUST00000030738.7	0.191445	0.177462	0.170501	0.0807115	0.0955003	0.140559	0.145887	0.0636943	0.153709	0.0588996	0.154337	0.130909	0.112093
Seh1l:ENSMUST00000025421.8	0.950053	0.936527	0.943142	0.828775	0.950217	0.949567	0.954519	0.834055	0.770933	0.634232	0.803073	0.320544	0.521927
Asf1a:ENSMUST00000020004.7	0.283088	0.206573	0.364573	0.165248	0.285714	0.386477	0.302264	0.361823	0.184437	0.212698	0.133075	0.107221	0.108739
Meaf6:ENSMUST00000154689.7	0.241935	0.306489	0.312166	0.15169	0.151584	0.213617	0.371457	0.137809	0.175094	0.0752618	0.0546345	0.0547667	0.102185
Tbl1x:ENSMUST00000088217.11	0.378459	0.572627	0.568469	0.34686	0.373668	0.53085	0.457595	0.558226	0.48072	0.430809	0.461111	0.338822	0.437969
Hspa4:ENSMUST00000020630.7	0.874486	0.932427	0.912148	0.727483	0.847727	0.909888	0.871875	0.829851	0.720961	0.609961	0.6564	0.408537	0.553838
Spin1:ENSMUST00000095797.5	0.850418	0.900303	0.931176	0.74124	0.840618	0.893187	0.894517	0.91073	0.759184	0.736115	0.672801	0.535519	0.591592
Pafah1b1:ENSMUST00000021091.14	0.883134	0.90257	0.914502	0.713655	0.838351	0.895687	0.913075	0.827143	0.781312	0.517855	0.670829	0.348195	0.526357
Mob4:ENSMUST00000162364.7	0.523543	0.636642	0.668381	0.453857	0.478551	0.555054	0.62592	0.535336	0.538753	0.449303	0.431714	0.467746	0.422616
Tspan13:ENSMUST00000020896.16	0.795818	0.811974	0.790533	0.596796	0.665372	0.790815	0.791156	0.77207	0.714025	0.70274	0.683243	0.614678	0.537903
Btbd9:ENSMUST00000168787.7	0.408413	0.515249	0.547122	0.298354	0.368359	0.445763	0.461654	0.457703	0.426141	0.309233	0.240355	0.251016	0.293574
Gna11:ENSMUST00000043604.5	0.505495	0.682303	0.671801	0.429213	0.395586	0.579799	0.590276	0.431732	0.585449	0.349441	0.486975	0.363184	0.48567
Srsf6:ENSMUST00000130411.6	0.266234	0.365915	0.333583	0.123007	0.175115	0.266609	0.28099	0.37995	0.212266	0.194633	0.1113	0.0851582	0.160334
Cisd2:ENSMUST00000029815.7	0.501016	0.609692	0.653	0.397015	0.419508	0.551342	0.57143	0.483256	0.552231	0.424761	0.336264	0.322319	0.311958
Hnrnpa3:ENSMUST00000111962.7	0.56447	0.458303	0.551646	0.303797	0.444259	0.47384	0.497934	0.430768	0.468649	0.327222	0.422466	0.235777	0.309664
Ube2d3:ENSMUST00000197134.2	0.489723	0.550272	0.559435	0.378853	0.435096	0.491625	0.516981	0.43016	0.384572	0.331241	0.314821	0.327439	0.308718
Med9:ENSMUST00000081980.6	0.327803	0.357985	0.348181	0.191741	0.218841	0.345749	0.341448	0.293383	0.231433	0.202798	0.189775	0.220324	0.196407
Cyb5b:ENSMUST00000034400.4	0.900694	0.941074	0.94121	0.75008	0.85761	0.911163	0.925127	0.905777	0.827628	0.703037	0.661396	0.532762	0.711534
Appbp2:ENSMUST00000018625.9	0.576257	0.632693	0.662395	0.415416	0.458484	0.522792	0.60143	0.577512	0.499236	0.491244	0.560493	0.310715	0.468641
Pa2g4:ENSMUST00000026425.12	0.596725	0.607281	0.605737	0.34703	0.564658	0.529008	0.547273	0.508032	0.365903	0.365512	0.206689	0.220909	0.355388
Bri3bp:ENSMUST00000049040.13	0.780992	0.742043	0.810496	0.53795	0.59289	0.739547	0.703839	0.564782	0.484202	0.303139	0.512703	0.173668	0.326279
Fip1l1:ENSMUST00000113536.7	0.626437	0.685241	0.643982	0.418149	0.517241	0.563041	0.600224	0.571429	0.524786	0.389896	0.400833	0.175055	0.355874
Fundc2:ENSMUST00000033541.4	0.246766	0.201887	0.25377	0.0733336	0.155191	0.226974	0.241224	0.0828303	0.0955864	0.0377933	0.108284	0.0340716	0.0468052
Stmn2:ENSMUST00000029002.8	0.392695	0.464233	0.528884	0.276875	0.39391	0.416328	0.473842	0.484622	0.342332	0.460997	0.497844	0.354748	0.265321
Pak3:ENSMUST00000172330.2	0.319697	0.349619	0.378737	0.189133	0.346372	0.349677	0.38763	0.471897	0.295737	0.36671	0.302714	0.38527	0.401636
Hnrnpu:ENSMUST00000037748.8	0.209753	0.226277	0.216914	0.149261	0.204905	0.210687	0.206446	0.199818	0.178001	0.160122	0.164045	0.119206	0.124959
Glod4:ENSMUST00000017430.11	0.707316	0.671421	0.69305	0.431884	0.443048	0.580843	0.618899	0.625572	0.488739	0.445775	0.503556	0.394385	0.346411
Pafah1b2:ENSMUST00000172450.2	0.669379	0.723745	0.750295	0.490617	0.459003	0.683587	0.650653	0.606525	0.610333	0.429215	0.53439	0.423177	0.466571
Hnrnpc:ENSMUST00000111610.11	0.274267	0.299221	0.311378	0.184749	0.252889	0.272872	0.34888	0.434871	0.264808	0.292988	0.277925	0.188737	0.207055
Fubp1:ENSMUST00000200524.4	0.534884	0.364952	0.423444	0.23513	0.336245	0.408526	0.470212	0.504219	0.391514	0.337993	0.42298	0.143333	0.22057
Hacd2:ENSMUST00000061156.9	0.192357	0.382481	0.35001	0.143567	0.13948	0.24315	0.33692	0.181336	0.231489	0.0830638	0.235602	0.0542618	0.0456924
Ubqln1:ENSMUST00000058735.11	0.841584	0.93591	0.918834	0.689697	0.816456	0.897252	0.899638	0.833114	0.865317	0.750794	0.78077	0.709343	0.701149
Rcc2:ENSMUST00000071169.8	0.925053	0.896201	0.908493	0.690162	0.899457	0.885042	0.920222	0.955224	0.865348	0.950898	0.851717	0.878159	0.884381
Calm3:ENSMUST00000019514.9	0.83099	0.696915	0.831756	0.53967	0.741996	0.694229	0.773079	0.856431	0.422302	0.603341	0.304709	0.538098	0.730119
Yipf4:ENSMUST00000024873.6	0.7737	0.786199	0.831225	0.538749	0.677316	0.799889	0.736696	0.756014	0.761166	0.704617	0.754603	0.677557	0.640483
Kpnb1:ENSMUST00000001479.4	0.595238	0.641673	0.686965	0.44189	0.704545	0.700969	0.652187	0.720787	0.51165	0.562887	0.390091	0.314574	0.465823
Ube2a:ENSMUST00000200835.3	0.539906	0.428839	0.469286	0.299156	0.449715	0.433703	0.590705	0.4	0.302512	0.296905	0.274289	0.283019	0.221672
Armcx3:ENSMUST00000086884.4	0.763158	0.817097	0.848333	0.572379	0.680498	0.75867	0.804377	0.691649	0.737361	0.576159	0.635484	0.368421	0.587644
Tmed10:ENSMUST00000040766.8	0.451446	0.576931	0.651937	0.397782	0.422148	0.447805	0.633543	0.363233	0.32075	0.327558	0.174219	0.244587	0.214685
Sh3glb1:ENSMUST00000198254.4	0.511545	0.44509	0.527333	0.361327	0.365081	0.512495	0.530567	0.395796	0.430761	0.229591	0.270144	0.140468	0.227702
Ghitm:ENSMUST00000165649.3	0.672627	0.698407	0.713239	0.513136	0.648156	0.668498	0.686635	0.636002	0.647782	0.544398	0.60875	0.491931	0.479091
Ccnd2:ENSMUST00000000188.11	0.460355	0.457826	0.644086	0.24035	0.296386	0.38973	0.509175	0.492496	0.554886	0.439498	0.368521	0.338006	0.460458
Usp14:ENSMUST00000092096.13	0.43787	0.480786	0.511529	0.233232	0.26764	0.445043	0.468772	0.245714	0.322137	0.127273	0.260132	0.138015	0.124302
Eapp:ENSMUST00000161592.7	0.252137	0.454746	0.434426	0.165945	0.242574	0.448468	0.423534	0.50774	0.290517	0.237867	0.184658	0.063655	0.179003
Snx12:ENSMUST00000077876.3	0.435897	0.298246	0.382794	0.0803324	0.195489	0.321589	0.339947	0.148492	0.27349	0.141141	0.175412	0.0938511	0.167078
Sugt1:ENSMUST00000054908.9	0.198563	0.187284	0.268546	0.0799059	0.0932719	0.17404	0.23033	0.182303	0.136212	0.0931444	0.0368105	0.027785	0.0340655
Copg1:ENSMUST00000113607.9	0.751479	0.821086	0.805671	0.502318	0.814583	0.79367	0.735108	0.804841	0.572377	0.551657	0.636677	0.28655	0.468305
Sms:ENSMUST00000112529.7	0.654867	0.752493	0.81189	0.453865	0.626016	0.789019	0.801318	0.611382	0.501416	0.168472	0.572193	0.331288	0.348361
Psip1:ENSMUST00000030207.14	0.57438	0.572	0.571429	0.189189	0.409326	0.528215	0.537624	0.366071	0.324324	0.17945	0.321392	0.2	0.223317
Anp32e:ENSMUST00000165307.7	0.826072	0.788011	0.864129	0.469324	0.643326	0.822809	0.875117	0.78256	0.638518	0.562826	0.522011	0.430064	0.445142
Otub1:ENSMUST00000025679.10	0.656168	0.844109	0.843414	0.313043	0.789474	0.765728	0.781068	NA	0.427407	0.561021	0.436359	0.378436	0.377301
Rrp36:ENSMUST00000024766.6	0.127952	0.176842	0.159922	0.1409	0.156269	0.134044	0.144311	0.0889061	0.131079	0.0962888	0.118509	0.0923937	0.109655
Camk1d:ENSMUST00000044009.13	0.901853	0.942685	0.948058	0.926046	0.927746	0.900687	0.935376	0.874257	0.879905	0.877863	0.890001	0.878276	0.888674
Camk2n1:ENSMUST00000050918.3	0.26681	0.345679	0.366987	0.285391	0.510114	0.256775	0.311743	0.712128	0.221236	0.52227	0.322468	0.244949	0.3074
Jmjd6:ENSMUST00000047616.9	0.135266	0.169451	0.0897073	0.0483271	0.269388	0.0665457	0.0713083	0.290625	0.111449	0.373716	0.0735235	0.0989011	0.301691
Arpc5:ENSMUST00000077755.10	0.402331	0.368326	0.426867	0.375733	0.528654	0.317952	0.363042	0.309203	0.40577	0.322624	0.398508	0.411858	0.418941
Mospd3:ENSMUST00000111007.7	0.393665	0.413098	0.468155	0.433855	0.579235	0.321956	0.398804	0.21322	0.418196	0.265823	0.432631	0.337778	0.435644
1810037I17Rik:ENSMUST00000106429.5	0.118946	0.161006	0.21357	0.137931	0.369161	0.212036	0.217433	0.257969	0.126628	0.273981	0.221701	0.177712	0.15149
Wdr83os:ENSMUST00000140621.1	0.607261	0.529794	0.556503	0.556628	0.679739	0.436838	0.540186	0.283784	0.586554	0.347721	0.514496	0.556569	0.579714
Ptbp2:ENSMUST00000029780.11	0.198413	0.115515	0.120216	0.0610687	0.258065	0.0808179	0.0976118	0.0472779	0.0232992	0.0135802	0.0619989	0.0315789	0.0725191
Tpm3-rs7:ENSMUST00000072359.7	0.549107	0.610678	0.676844	0.62037	0.785829	0.572989	0.641539	0.677098	0.629142	0.696346	0.643212	0.688489	0.684799
Gusb:ENSMUST00000111308.7	0.181818	0.13245	0.145535	0.185185	0.293103	0.106395	0.170161	0.376344	0.292754	0.333333	0.192448	0.308921	0.395593
Fkbp2:ENSMUST00000238181.1	0.889949	0.887815	0.893452	0.897343	0.912264	0.855842	0.876994	NA	0.886176	0.841513	0.885103	0.882585	0.886704
Sv2a:ENSMUST00000035371.8	0.4752	0.457664	0.481204	0.480462	0.628996	0.478063	0.474456	0.609784	0.449178	0.395428	0.557519	0.457213	0.441456
Comt:ENSMUST00000165430.7	0.4638	0.39623	0.436838	0.373328	0.535873	0.3521	0.390845	0.417121	0.425133	0.461321	0.445732	0.30509	0.417029
Rps18:ENSMUST00000174609.8	0.679545	0.607341	0.630265	0.628422	0.742714	0.499708	0.609373	0.317072	0.630385	0.371459	0.629385	0.642961	0.648925
Epha5:ENSMUST00000113398.7	0.351628	0.467469	0.430471	0.368754	0.31517	0.404847	0.371866	0.495249	0.223705	0.348823	0.402078	0.190663	0.169694
Prkca:ENSMUST00000059595.10	0.900654	0.907922	0.874864	0.855514	0.941424	0.929719	0.905574	0.856843	0.848841	0.725419	0.847935	0.687233	0.812877
Vps52:ENSMUST00000025178.16	0.183908	0.0662983	0.0802589	0.0906863	0.215278	0.110337	0.0697002	0.396396	0.0822222	0.341164	0.17748	0.124611	0.186373
Hs6st2:ENSMUST00000088172.11	0.604839	0.629338	0.600668	0.683333	0.776504	0.603817	0.685329	0.695652	0.507576	0.609756	0.626667	0.47619	0.588235
Srsf2:ENSMUST00000092404.12	0.80148	0.80103	0.799034	0.823507	0.813823	0.775819	0.788662	0.767111	0.815326	0.7832	0.810091	0.827374	0.798691
Taz:ENSMUST00000124200.7	0.33803	0.37106	0.296958	0.275844	0.383307	0.287218	0.257928	0.405487	0.137261	0.215224	0.148405	0.0975373	0.17981
Cacna1a:ENSMUST00000238701.1	0.22031	0.251875	0.211339	0.239006	0.315119	0.20009	0.16523	0.203377	0.338122	0.394859	0.560376	0.319919	0.328829
Galnt17:ENSMUST00000086023.11	0.316163	0.172112	0.223955	0.221307	0.225235	0.162478	0.172838	0.366504	0.237125	0.358482	0.161747	0.151613	0.229077
Dynlt1f:ENSMUST00000179554.2	0.842294	0.834447	0.863831	0.827675	0.89157	0.812585	0.766188	0.744674	0.848041	0.766437	0.841162	0.834566	0.848523
Shfl:ENSMUST00000043911.7	0.594235	0.524664	0.569644	0.48748	0.625079	0.448453	0.506423	0.307291	0.480838	0.328965	0.539669	0.456612	0.442137
Rbm33:ENSMUST00000059644.12	0.82	0.614428	0.577417	0.593625	0.731343	0.641141	0.612809	0.624161	0.638773	0.631858	0.449593	0.461538	0.569149
Ipo13:ENSMUST00000036156.5	0.157718	0.174917	0.161966	0.111111	0.238095	0.152818	0.0913892	0.283489	0.0950324	0.157895	0.0790618	0.0434783	0.120879
Pbrm1:ENSMUST00000112095.7	0.643078	0.561513	0.546636	0.607734	0.710511	0.611633	0.589158	0.617259	0.533876	0.626191	0.616084	0.613607	0.626434
Ddx39a:ENSMUST00000172396.7	0.333333	0.285714	0.358571	0.318339	0.415663	0.246971	0.307132	0.191919	0.366577	0.241417	0.293578	0.31087	0.334433
Fbxo3:ENSMUST00000111136.7	0.271021	0.371474	0.329299	0.260194	0.408525	0.308883	0.353617	0.340542	0.327565	0.333595	0.328337	0.338518	0.383836
Rnf157:ENSMUST00000100202.9	0.833195	0.899654	0.920058	0.88829	0.89399	0.90413	0.896055	0.911215	0.640555	0.766092	0.752828	0.765951	0.782201
Fam155a:ENSMUST00000208933.1	0.352071	0.399815	0.405127	0.451613	0.532895	0.394667	0.442614	0.609485	0.340314	0.441667	0.432836	0.354839	0.584906
Srgap2:ENSMUST00000097588.8	0.0914826	0.0714286	0.0637523	0.067757	0.176871	0.0595065	0.0715884	0.153846	0.0762053	0.179592	0.0676437	0.231612	0.103552
Bpnt2:ENSMUST00000084949.2	0.455813	0.449339	0.428151	0.51258	0.571766	0.441662	0.49418	0.73637	0.40208	0.670182	0.507082	0.37229	0.468614
Gnao1:ENSMUST00000125716.7	0.866634	0.836179	0.841499	0.843577	0.839072	0.833118	0.836496	0.835415	0.831354	0.833706	0.832792	0.834943	0.808195
Hars:ENSMUST00000001416.7	0.353659	0.318148	0.41	0.400367	0.459016	0.284752	0.351094	0.147059	0.349831	0.264359	0.400355	0.372832	0.442992
Dnajc5:ENSMUST00000072334.11	0.390782	0.382567	0.396789	0.373915	0.410006	0.38227	0.438091	0.394033	0.362357	0.352957	0.391238	0.36406	0.372851
Iqsec1:ENSMUST00000101153.9	0.205719	0.142673	0.0945126	0.113481	0.213556	0.108908	0.112441	0.276683	0.111897	0.166256	0.0876989	0.162629	0.138049
Lysmd1:ENSMUST00000066386.5	0.920635	0.817891	0.870246	0.875	0.915254	0.774194	0.784188	0.547945	0.865478	0.677043	0.842511	0.827586	0.840426
Blcap:ENSMUST00000109528.8	0.433628	0.405451	0.45329	0.384283	0.492988	0.31932	0.387776	0.208065	0.422246	0.25823	0.387187	0.380835	0.398601
Mecp2:ENSMUST00000100750.9	0.825158	0.884866	0.868718	0.740245	0.873367	0.858242	0.857361	0.808319	0.772769	0.645213	0.76977	0.427225	0.641839
Rpp21:ENSMUST00000077535.4	0.426073	0.327785	0.383102	0.361893	0.428285	0.236055	0.340271	0.179975	0.372572	0.240776	0.341791	0.336313	0.368093
Tmem234:ENSMUST00000102591.9	0.374814	0.355856	0.379928	0.317107	0.461122	0.362028	0.364835	0.519959	0.373155	0.519538	0.374977	0.320406	0.411814
Pde4b:ENSMUST00000106908.8	0.646552	0.652068	0.693047	0.554217	0.529412	0.574215	0.618341	0.647799	0.566486	0.492459	0.690817	0.465347	0.554487
Mtss2:ENSMUST00000052457.14	0.957143	0.923353	0.8995	0.912088	0.766667	0.885298	0.755299	0.95941	0.946917	0.921618	0.757911	0.860465	0.904372
Rab22a:ENSMUST00000029024.9	0.355177	0.206335	0.247385	0.208964	0.14227	0.186759	0.258649	0.265806	0.374565	0.342936	0.207394	0.185681	0.299372
Desi2:ENSMUST00000027783.13	0.18663	0.244804	0.276423	0.164319	0.123404	0.17243	0.239318	0.279883	0.285335	0.265698	0.19417	0.143529	0.206448
Plekha5:ENSMUST00000087622.5	0.663934	0.734967	0.757095	0.657143	0.645833	0.713043	0.760836	0.65874	0.611969	0.670794	0.655385	0.731707	0.614786
Rcan2:ENSMUST00000044792.5	0.907767	0.938889	0.94647	0.847403	0.819403	0.916949	0.900569	0.786517	0.778497	0.677083	0.626606	0.760563	0.776329
Shisa4:ENSMUST00000041240.3	0.468085	0.476129	0.480328	0.446613	0.419569	0.545995	0.526962	0.639323	0.383841	0.549303	0.3546	0.392157	0.361702
Gtf2h1:ENSMUST00000006774.10	0.523364	0.607492	0.635806	0.601449	0.478431	0.497762	0.588167	0.543417	0.645087	0.608899	0.573519	0.637131	0.614181
Bloc1s6:ENSMUST00000005954.8	0.22449	0.259766	0.243153	0.218462	0.131313	0.186226	0.244383	0.0804598	0.267045	0.0985692	0.200935	0.158273	0.226
Id4:ENSMUST00000021810.2	0.337746	0.44262	0.508761	0.446677	0.38451	0.470327	0.448987	0.583154	0.396224	0.4633	0.465107	0.367214	0.401617
Lyrm9:ENSMUST00000147875.8	0.334371	0.402413	0.404159	0.288598	0.332194	0.409346	0.42052	0.490249	0.173569	0.170471	0.11341	0.18449	0.114987
Fyttd1:ENSMUST00000023489.10	0.632464	0.696085	0.692638	0.587933	0.519277	0.584927	0.648194	0.581854	0.572803	0.504221	0.511492	0.500102	0.522812
Mlec:ENSMUST00000112121.5	0.749166	0.771536	0.818426	0.563635	0.669298	0.72313	0.786202	0.72885	0.83822	0.68612	0.911768	0.634076	0.575663
Phf24:ENSMUST00000107975.7	0.649755	0.715709	0.697889	0.609834	0.566079	0.684535	0.670504	0.741559	0.630883	0.643478	0.675258	0.665199	0.696671
Tpp1:ENSMUST00000033184.5	0.169231	0.183784	0.174678	0.141414	0.037037	0.129547	0.129479	0.226601	0.206069	0.221133	0.147225	0.137397	0.197646
Adipor1:ENSMUST00000027727.14	0.390991	0.374181	0.393118	0.383043	0.309839	0.371148	0.340288	0.372651	0.386221	0.348511	0.327061	0.332973	0.320265
Tfam:ENSMUST00000092430.10	0.251462	0.288095	0.288742	0.150718	0.109195	0.246661	0.174118	0.217647	0.148847	0.0882103	0.13807	0.097166	0.111111
6430548M08Rik:ENSMUST00000034281.12	0.784797	0.775176	0.787941	0.77098	0.644591	0.715069	0.783891	0.829421	0.819671	0.83744	0.804157	0.726158	0.774864
Zdhhc20:ENSMUST00000089473.4	0.55439	0.783747	0.778397	0.587207	0.621937	0.696982	0.706276	0.665925	0.637259	0.596974	0.687093	0.424296	0.554073
Tgoln1:ENSMUST00000070524.4	0.70539	0.844135	0.82658	0.739617	0.705691	0.734509	0.767324	0.894181	0.78115	0.830327	0.766569	0.718525	0.698302
Cyria:ENSMUST00000069066.13	0.814374	0.864428	0.912521	0.824677	0.748527	0.852032	0.855837	0.878394	0.754756	0.77399	0.668353	0.479708	0.719121
Tm9sf3:ENSMUST00000025989.9	0.620341	0.566886	0.5493	0.442231	0.39686	0.553915	0.450937	0.455501	0.475036	0.361514	0.390362	0.199249	0.387447
Ehd3:ENSMUST00000024860.8	0.795987	0.830769	0.838189	0.824806	0.702703	0.787203	0.803819	0.814947	0.822688	0.757962	0.803025	0.5	0.824977
Gclm:ENSMUST00000029769.13	0.326395	0.395678	0.434138	0.231599	0.245422	0.339495	0.405235	0.23398	0.327069	0.208931	0.278145	0.178904	0.17272
Hgsnat:ENSMUST00000037609.7	0.381192	0.383092	0.35136	0.244197	0.24921	0.346349	0.367172	0.438688	0.143164	0.18551	0.368585	0.118954	0.168281
Ccdc85a:ENSMUST00000093253.9	0.570107	0.534969	0.571807	0.531069	0.446865	0.498709	0.544387	0.564015	0.512506	0.463568	0.503434	0.556404	0.515177
Gid8:ENSMUST00000029090.8	0.277621	0.345243	0.376369	0.204366	0.177673	0.286122	0.265942	0.513999	0.258925	0.334651	0.195724	0.177864	0.214904
Psen1:ENSMUST00000101225.1	0.447087	0.36446	0.442025	0.343538	0.336974	0.387732	0.457075	0.262263	0.27156	0.245231	0.279107	0.237948	0.255269
Imp4:ENSMUST00000027303.13	0.256058	0.331912	0.332106	0.203185	0.160258	0.285209	0.2425	0.435659	0.24957	0.13976	0.210296	0.0655426	0.189517
Pde4a:ENSMUST00000039413.14	0.381958	0.405339	0.519424	0.391988	0.373997	0.486323	0.493344	0.357931	0.456392	0.511434	0.414971	0.395217	0.413899
Ppp1r7:ENSMUST00000027494.10	0.239523	0.171861	0.228343	0.130097	0.119728	0.207008	0.163956	0.219757	0.172772	0.117127	0.165145	0.062677	0.10812
Brf1:ENSMUST00000011302.8	0.310345	0.319885	0.333648	0.277473	0.201681	0.332589	0.299707	0.371841	0.302142	0.205108	0.164389	0.155612	0.215238
Mtmr7:ENSMUST00000048898.16	0.304552	0.277269	0.288078	0.223044	0.200999	0.287386	0.243484	0.211822	0.308229	0.259527	0.255181	0.301141	0.221659
Flad1:ENSMUST00000129308.8	0.262055	0.172719	0.182947	0.180335	0.153605	0.156666	0.172146	0.297572	0.19558	0.353178	0.145469	0.096743	0.209014
Psmf1:ENSMUST00000042452.10	0.354167	0.424855	0.453197	0.322388	0.278689	0.343345	0.391724	0.475177	0.429719	0.355082	0.299753	0.132075	0.205011
Syngr1:ENSMUST00000009727.11	0.911504	0.948389	0.957785	0.926554	0.831002	0.907132	0.947537	0.943101	0.895812	0.745665	0.87619	0.857143	0.96587
Rcan3:ENSMUST00000030606.13	0.849741	0.968689	0.957082	0.909747	0.820312	0.936691	0.843552	0.960366	0.924386	0.879747	0.93844	0.883721	0.834936
Cox11:ENSMUST00000020851.14	0.375596	0.237639	0.237726	0.317627	0.186727	0.235712	0.243362	0.236415	0.309761	0.276148	0.305291	0.251165	0.246707
Bnip3:ENSMUST00000106112.1	0.34153	0.355368	0.327049	0.241083	0.235825	0.303574	0.322909	0.249411	0.241662	0.200264	0.213196	0.219287	0.230746
Neu1:ENSMUST00000007253.5	0.461929	0.494098	0.494737	0.390863	0.330409	0.447169	0.423028	0.539474	0.414713	0.472169	0.367323	0.373643	0.472345
Kdm7a:ENSMUST00000002305.8	0.415789	0.437346	0.525602	0.391949	0.343949	0.447246	0.446672	0.385113	0.418236	0.369261	0.426186	0.422034	0.444359
Il34:ENSMUST00000150680.1	0.638231	0.347457	0.336737	0.338064	0.255855	0.329512	0.366059	0.355679	0.466529	0.227031	0.426779	0.35288	0.212828
Gnaq:ENSMUST00000025541.5	0.524303	0.454556	0.447409	0.442325	0.460503	0.45048	0.476344	0.423807	0.487302	0.454876	0.482735	0.546055	0.486146
Opcml:ENSMUST00000115243.8	0.903226	0.908147	0.922926	0.897912	0.760181	0.82602	0.868493	0.818182	0.878641	0.902314	0.870677	0.777778	0.698413
Adam11:ENSMUST00000068150.6	0.939555	0.877193	0.899455	0.892442	0.788945	0.886447	0.906122	0.932308	0.89559	0.862664	0.866667	0.864865	0.873786
Dusp8:ENSMUST00000039926.9	0.464481	0.494746	0.566014	0.503043	0.402834	0.511809	0.50787	0.611455	0.500949	0.534815	0.561981	0.475806	0.527828
Hipk1:ENSMUST00000118317.7	0.830846	0.74878	0.782289	0.777003	0.701245	0.777344	0.867865	0.684583	0.755089	0.735374	0.687332	0.738019	0.634316
Rab11a:ENSMUST00000169058.7	0.550015	0.575443	0.649798	0.499943	0.463215	0.589436	0.560495	0.407207	0.441073	0.363829	0.346181	0.230895	0.163231
Ubr3:ENSMUST00000055758.15	0.693031	0.629144	0.638993	0.660354	0.541117	0.617534	0.697422	0.686447	0.522459	0.49649	0.549247	0.420139	0.389918
Dazap1:ENSMUST00000105362.7	0.722015	0.672154	0.73405	0.651137	0.582834	0.680243	0.71183	0.772846	0.702738	0.729401	0.668023	0.721022	0.702789
Ddx6:ENSMUST00000170489.1	0.576598	0.744709	0.744807	0.633761	0.659913	0.651987	0.695817	0.75682	0.745752	0.781513	0.707563	0.660337	0.758207
Mbnl2:ENSMUST00000088419.12	0.371484	0.442422	0.498662	0.395588	0.314481	0.389643	0.43658	0.51361	0.362635	0.478262	0.463655	0.286814	0.411542
Nmt1:ENSMUST00000021314.7	0.733766	0.77208	0.698911	0.598071	0.601227	0.687119	0.735582	0.701258	0.647217	0.520263	0.513712	0.218208	0.436644
Ipo9:ENSMUST00000041023.13	0.555046	0.585511	0.605621	0.447312	0.467681	0.571863	0.591134	0.550409	0.493988	0.402872	0.419262	0.368231	0.522702
Tnrc6b:ENSMUST00000067689.8	0.286438	0.276847	0.345274	0.301	0.167548	0.255747	0.301187	0.316091	0.290427	0.295157	0.308831	0.272446	0.297622
Gskip:ENSMUST00000051934.6	0.229358	0.159129	0.156134	0.135514	0.0534979	0.117868	0.196755	0.115819	0.215847	0.136797	0.115839	0.0916335	0.13956
H13:ENSMUST00000089059.8	0.322441	0.221964	0.204001	0.141044	0.0828332	0.205357	0.200525	0.19954	0.0772655	0.0989016	0.0556304	0.0352037	0.066829
Mxd4:ENSMUST00000042701.12	0.464429	0.432476	0.494274	0.421579	0.334963	0.435704	0.47052	0.459414	0.505057	0.344856	0.426488	0.371905	0.471183
Gmfb:ENSMUST00000111817.7	0.798028	0.908254	0.932692	0.852352	0.768832	0.831862	0.906624	0.891031	0.890637	0.859281	0.705438	0.799569	0.732842
Sdc2:ENSMUST00000022871.6	0.716918	0.786257	0.807155	0.664048	0.648802	0.704215	0.762418	0.661675	0.614475	0.556549	0.530773	0.443574	0.598031
Gabrb1:ENSMUST00000031122.8	0.160296	0.44077	0.419253	0.30352	0.257395	0.328569	0.35749	0.386803	0.207944	0.144337	0.3145	0.39178	0.477515
Pigk:ENSMUST00000159899.7	0.702564	0.76348	0.764821	0.518939	0.603448	0.672857	0.72368	0.640177	0.291262	0.430199	0.362971	0.272189	0.436789
Zmat3:ENSMUST00000029199.10	0.844444	0.854478	0.815926	0.780374	0.742081	0.78744	0.913168	0.849845	0.79359	0.653563	0.822423	0.686275	0.751185
Pdhx:ENSMUST00000011058.8	0.689076	0.787273	0.817091	0.620865	0.663317	0.78613	0.787411	0.697674	0.722261	0.566108	0.576777	0.582353	0.475
Eif3j1:ENSMUST00000028668.7	0.241266	0.307061	0.331978	0.201318	0.262244	0.293269	0.293301	0.170675	0.25112	0.150618	0.252328	0.131083	0.147488
Mef2c:ENSMUST00000197722.4	0.392099	0.408492	0.492496	0.341546	0.283511	0.402581	0.438828	0.40933	0.411584	0.338295	0.362275	0.251161	0.331633
Actr1b:ENSMUST00000043951.9	0.55611	0.602365	0.577582	0.529153	0.420719	0.557494	0.530785	0.659794	0.388375	0.425156	0.470014	0.376518	0.446379
Hdgfl3:ENSMUST00000107305.7	0.56804	0.524719	0.577349	0.477059	0.40268	0.522195	0.546395	0.392415	0.598845	0.406001	0.528724	0.470986	0.514282
Slc9a3r2:ENSMUST00000019684.12	0.441125	0.428843	0.351712	0.319853	0.294118	0.451029	0.418033	0.40824	0.35743	0.440374	0.574622	0.505618	0.447683
Ccnd2:ENSMUST00000201066.1	0.4	0.289474	0.316667	0.296791	0.129771	0.227113	0.241672	0.0588235	0.0811966	0.0522876	0.0625	0.142857	0.127341
Pip5k1a:ENSMUST00000107236.8	0.483146	0.501563	0.468074	0.453804	0.32906	0.470494	0.447045	0.415233	0.445905	0.370656	0.446249	0.380488	0.42902
Ptpn1:ENSMUST00000029053.7	0.367021	0.337004	0.371724	0.275244	0.207447	0.299081	0.341579	0.386831	0.469962	0.301178	0.367754	0.215938	0.380108
Gm26992:ENSMUST00000182089.1	0.147436	0.234501	0.342711	0.18802	0.112069	0.237845	0.253985	NA	0.208678	0.195531	0.197587	0.15544	0.221264
Nrgn:ENSMUST00000065668.11	0.621411	0.551811	0.544566	0.509713	0.466251	0.509669	0.555424	NA	0.567296	0.567359	0.572774	0.576321	0.517477
Cpox:ENSMUST00000060077.6	0.371901	0.48538	0.485232	0.373134	0.330144	0.408277	0.47556	0.526984	0.492462	0.498339	0.416602	0.393728	0.404959
Aup1:ENSMUST00000092618.8	0.821705	0.6	0.761039	0.736585	0.553191	0.594209	0.695952	0.361884	0.737667	0.464238	0.656521	0.666415	0.670938
Phactr1:ENSMUST00000148891.7	0.451883	0.649832	0.630753	0.5392	0.454545	0.537808	0.589347	0.404821	0.560976	0.27542	0.525788	0.312139	0.5
Sox4:ENSMUST00000067230.5	0.290585	0.234614	0.275053	0.214989	0.140198	0.217333	0.254426	0.367524	0.247061	0.251533	0.24643	0.167259	0.222127
Dpysl5:ENSMUST00000114729.7	0.77551	0.579974	0.719872	0.755459	0.541436	0.622419	0.680147	0.636523	0.692308	0.741667	0.645412	0.666667	0.666667
Rnf165:ENSMUST00000026494.13	0.545943	0.472753	0.554066	0.477349	0.369084	0.479725	0.500267	0.431621	0.425411	0.390601	0.506927	0.51969	0.520673
Rab1a:ENSMUST00000020358.11	0.274783	0.302795	0.312201	0.24515	0.166311	0.291916	0.302434	0.265999	0.252336	0.255238	0.223775	0.161823	0.195584
B230219D22Rik:ENSMUST00000057844.9	0.81203	0.828534	0.827315	0.75835	0.664384	0.754919	0.801822	0.820321	0.743381	0.693697	0.732365	0.670175	0.780612
Cyrib:ENSMUST00000063838.10	0.380306	0.360968	0.412165	0.292254	0.246679	0.367803	0.377075	0.154058	0.210932	0.0825325	0.110218	0.0308	0.0569902
Gtf2e2:ENSMUST00000171010.7	0.477064	0.375358	0.426269	0.321321	0.233766	0.407407	0.338758	0.253807	0.434679	0.324828	0.429088	0.408015	0.399811
Atg4b:ENSMUST00000027502.15	0.426579	0.459573	0.466464	0.319557	0.329272	0.401087	0.391996	0.403376	0.302904	0.219515	0.221326	0.210173	0.264481
Tmem183a:ENSMUST00000049470.10	0.565174	0.598273	0.64727	0.555551	0.455818	0.568907	0.591928	0.610618	0.551137	0.500873	0.515146	0.464594	0.4055
Mt1:ENSMUST00000034215.7	0.997305	0.973145	0.987788	0.986429	0.8358	0.942501	0.981138	0.374586	0.979956	0.664939	0.947207	0.960609	0.912865
Mtus2:ENSMUST00000071878.11	0.411059	0.484895	0.504266	0.445046	0.37962	0.501136	0.486268	0.312255	0.499867	0.236622	0.546404	0.262785	0.376382
Napg:ENSMUST00000025474.13	0.886364	0.914735	0.950848	0.813084	0.776173	0.889016	0.909446	0.886305	0.873995	0.729977	0.783694	0.70073	0.750542
Gdap1:ENSMUST00000026879.7	0.744836	0.800186	0.786212	0.71728	0.603561	0.707626	0.731796	0.799667	0.741022	0.77474	0.756245	0.678681	0.705726
Mdm4:ENSMUST00000188090.6	0.739498	0.686001	0.681672	0.582371	0.639171	0.671105	0.688481	0.627713	0.617429	0.580423	0.580479	0.525954	0.575186
Nav3:ENSMUST00000032719.14	0.3837	0.402409	0.406591	0.431568	0.267431	0.366739	0.405354	0.417936	0.39374	0.400112	0.48578	0.36856	0.297083
Gsk3b:ENSMUST00000023507.12	0.476563	0.524832	0.518875	0.311652	0.335339	0.421476	0.456038	0.495469	0.452295	0.433228	0.404047	0.278788	0.368508
Gsto1:ENSMUST00000026050.7	0.763636	0.659459	0.744981	0.798742	0.603175	0.817087	0.688952	0.903509	0.670146	0.863884	0.617272	0.70362	0.650568
Pitpna:ENSMUST00000143219.7	0.571555	0.573374	0.608889	0.517395	0.48129	0.564413	0.570515	0.489956	0.449995	0.389131	0.355324	0.338207	0.360493
Slc39a3:ENSMUST00000117276.10	0.861751	0.889401	0.910646	0.8	0.734234	0.857706	0.87484	0.837278	0.80558	0.69244	0.818824	0.389558	0.560797
Tsr2:ENSMUST00000112683.8	0.349515	0.288152	0.29478	0.275434	0.149215	0.259259	0.302871	0.501433	0.249169	0.215618	0.264138	0.111111	0.185897
Alcam:ENSMUST00000023312.13	0.715606	0.748256	0.722638	0.657317	0.676488	0.716243	0.709489	0.574903	0.643387	0.584353	0.686044	0.717462	0.620093
Eid1:ENSMUST00000164756.3	0.787719	0.844469	0.858541	0.802299	0.64023	0.739829	0.765158	0.779524	0.703549	0.739813	0.714242	0.702479	0.708583
Hdac4:ENSMUST00000097644.8	0.4375	0.555263	0.558672	0.498559	0.35426	0.47549	0.486147	0.363874	0.521705	0.359296	0.50168	0.550562	0.536977
Atg2b:ENSMUST00000041055.8	0.461331	0.54317	0.536038	0.4445	0.402129	0.498459	0.536849	0.488851	0.341162	0.359095	0.373395	0.295353	0.311454
Ank:ENSMUST00000022875.6	0.483077	0.538232	0.568741	0.5199	0.370968	0.563641	0.48915	0.506931	0.511545	0.399761	0.34022	0.311377	0.475561
Gm38394:ENSMUST00000179598.3	0.857351	0.830026	0.843231	0.770213	0.673267	0.771763	0.840151	0.709485	0.870839	0.719541	0.774124	0.75	0.801354
Cbx5:ENSMUST00000118152.7	0.680625	0.64994	0.674004	0.533222	0.420202	0.51954	0.616777	0.677324	0.723245	0.629527	0.580265	0.620289	0.662764
Gprc5b:ENSMUST00000008878.9	0.951941	0.882784	0.937222	0.724551	0.755102	0.897344	0.880274	0.602564	0.632444	0.556968	0.328853	0.615385	0.725126
Sowaha:ENSMUST00000104955.3	0.633474	0.756331	0.730983	0.705226	0.562946	0.693509	0.719666	0.399643	0.732197	0.625916	0.645983	0.633754	0.553529
Eif4e3:ENSMUST00000032151.2	0.131205	0.221501	0.212794	0.135453	0.1273	0.160887	0.191798	0.223316	0.181258	0.182873	0.178832	0.155507	0.170086
Rbbp6:ENSMUST00000098062.8	0.395189	0.447183	0.455793	0.451613	0.296104	0.474733	0.436847	0.31215	0.343823	0.293651	0.299802	0.197368	0.198985
Gng4:ENSMUST00000021734.8	0	0.849478	0.837269	0.759003	0.656915	0.80877	0.796521	0.891606	0.816993	0.84507	0.862745	0.961538	0.782051
Rab10:ENSMUST00000021001.9	0.714044	0.718048	0.745766	0.660921	0.589421	0.698117	0.749354	0.799516	0.729802	0.738167	0.703988	0.525104	0.566777
Tanc2:ENSMUST00000100330.9	0.347679	0.491366	0.523904	0.396704	0.308802	0.426882	0.458431	0.41513	0.375451	0.381173	0.378124	0.361124	0.371675
Pnma2:ENSMUST00000089236.10	0.23116	0.378662	0.394365	0.23705	0.208	0.358748	0.333179	0.489088	0.285404	0.332216	0.245674	0.181077	0.279001
Tmem248:ENSMUST00000065329.12	0.848485	0.821958	0.870226	0.706093	0.642857	0.801376	0.771655	0.701847	0.72099	0.673896	0.419771	0.56168	0.456805
Nudt19:ENSMUST00000040962.5	0.620536	0.559664	0.603835	0.660322	0.426056	0.614598	0.56956	0.771852	0.673982	0.774483	0.608863	0.631579	0.610338
Ctdspl:ENSMUST00000073109.11	0.344828	0.32948	0.382138	0.350211	0.155102	0.296113	0.314889	0.191781	0.438287	0.490625	0.542017	0.657143	0.590134
Atg13:ENSMUST00000076803.11	0.727749	0.542289	0.635024	0.549724	0.449153	0.591805	0.622012	0.604651	0.738659	0.698044	0.687322	0.635714	0.674107
Arf6:ENSMUST00000050063.8	0.47486	0.447094	0.491797	0.327522	0.254181	0.338397	0.436866	0.192867	0.265881	0.264552	0.235899	0.194335	0.240709
Eif3j2:ENSMUST00000057110.10	0.297872	0.237288	0.287341	0.328294	0.130841	0.328358	0.300337	0.2	0.254212	0.270625	0.14201	0.258621	0.222968
Dnajb1:ENSMUST00000005620.9	0.768116	0.785624	0.847386	0.691958	0.605191	0.804233	0.755587	0.740446	0.623872	0.442205	0.590517	0.335647	0.471516
Dhdds:ENSMUST00000144668.7	0.629164	0.803092	0.813224	0.414008	0.581361	0.761359	0.74622	0.689601	0.482711	0.403895	0.532384	0.30476	0.460669
Grb2:ENSMUST00000106499.7	0.756924	0.749002	0.786725	0.700421	0.606773	0.735232	0.772159	0.684515	0.769369	0.634275	0.642826	0.750601	0.705781
Ufm1:ENSMUST00000146598.7	0.22669	0.239907	0.277295	0.184095	0.160909	0.261018	0.223216	0.241169	0.19676	0.209337	0.164931	0.158523	0.166582
Emb:ENSMUST00000022242.8	0.276156	0.30304	0.265001	0.284099	0.231092	0.343909	0.246212	0.307429	0.127899	0.160969	0.221213	0.124825	0.111528
Nf1:ENSMUST00000071325.8	0.934213	0.938108	0.921451	0.910018	0.810999	0.931333	0.915658	0.88688	0.886754	0.867345	0.858234	0.799265	0.873863
Atp6v1c1:ENSMUST00000022904.7	0.835646	0.856189	0.838871	0.778137	0.603485	0.834146	0.817463	0.778146	0.758131	0.709822	0.623936	0.649853	0.515292
Gpm6b:ENSMUST00000112235.7	0.582707	0.825342	0.780422	0.769549	0.600529	0.761426	0.848687	0.528736	0.563664	0.383015	0.444919	0.365989	0.413297
Arl5a:ENSMUST00000036541.7	0.753987	0.837443	0.859249	0.821841	0.564239	0.798906	0.765441	0.876888	0.815437	0.841943	0.828837	0.747068	0.748174
Rfk:ENSMUST00000025617.3	0.641647	0.752195	0.752968	0.547241	0.461101	0.711707	0.693516	0.797093	0.743246	0.704571	0.651884	0.577078	0.545562
Srp19:ENSMUST00000072576.9	0.768707	0.608732	0.722897	0.620564	0.45576	0.714169	0.713677	0.298185	0.731572	0.361098	0.663635	0.646119	0.619818
Atp5a1:ENSMUST00000026495.14	0.599282	0.524986	0.623524	0.609343	0.339139	0.573298	0.589987	0.702797	0.582653	0.627359	0.521823	0.548399	0.570001
Yy1:ENSMUST00000021692.8	0.63483	0.567617	0.588068	0.414355	0.303638	0.572161	0.555043	0.432602	0.524775	0.309811	0.494874	0.365477	0.46508
Golt1b:ENSMUST00000032372.6	0.419464	0.424195	0.428199	0.300873	0.272187	0.440284	0.416103	0.480278	0.302425	0.391412	0.253514	0.158798	0.127716
Ccdc184:ENSMUST00000031914.5	0.653846	0.708185	0.723871	0.487179	0.341577	0.760163	0.45172	0.434685	0.45679	0.202128	0.745763	0.6	0.367089
Ola1:ENSMUST00000028517.12	0.529252	0.58486	0.556827	0.494869	0.252546	0.520797	0.534752	0.506104	0.504748	0.489861	0.458876	0.487308	0.436399
Chrna4:ENSMUST00000067120.13	0.9724	0.936951	0.86862	0.890897	0.83126	0.931572	0.731078	NA	0.884443	0.94318	0.829059	0.856399	0.909085
Nova2:ENSMUST00000032571.9	0.745643	0.499038	0.533822	0.819827	0.459029	0.795697	0.651545	0.871257	0.573201	0.567899	0.776064	0.47325	0.619016
Phf12:ENSMUST00000049167.13	0.777778	0.714829	0.849169	0.676923	0.842697	0.788931	0.507966	0.844156	0.73736	0.641643	0.851643	0.537572	0.706553
Mbd2:ENSMUST00000074058.10	0.239583	0.103352	0.114613	0.162338	0.147727	0.31295	0.155161	0.0117302	0.109281	0.0235964	0.115519	0.0714286	0.0720572
Psma3:ENSMUST00000160027.7	0.155177	0.125267	0.203526	0.118847	0.103379	0.18645	0.155314	0.134792	0.132572	0.113212	0.134364	0.0796225	0.0981837
Csf2ra:ENSMUST00000076046.6	0.420635	0.326715	0.35404	0.353755	0.314904	0.413632	0.222832	0.356073	0.173077	0.235198	0.129615	0.104683	0.143357
Slc1a4:ENSMUST00000109594.7	0.971429	0.898827	0.880936	0.900524	0.726415	0.919528	0.659781	0.911475	0.923274	0.900201	0.940828	0.852941	0.853659
Cul3:ENSMUST00000163119.7	0.491063	0.368149	0.41775	0.481081	0.391112	0.508837	0.389391	0.275619	0.296298	0.276908	0.283042	0.193084	0.233174
Timm10b:ENSMUST00000106783.7	0.289862	0.278669	0.274389	0.183907	0.263202	0.27593	0.235456	0.11473	0.0984776	0.0883136	0.160502	0.0817718	0.0799415
Septin11:ENSMUST00000201700.3	0.875817	0.897233	0.85006	0.825688	0.851064	0.910147	0.762862	0.841727	0.863095	0.826087	0.765625	0.617647	0.835596
Cwc22:ENSMUST00000111821.8	0.208	0.239024	0.332683	0.334302	0.285714	0.403881	0.269681	0.0677966	0.33002	0.166234	0.246253	0.246377	0.280303
Tmem29:ENSMUST00000163233.1	0.712191	0.795409	0.819471	0.678206	0.806822	0.836474	0.617406	0.460208	0.576286	0.482303	0.599458	0.455249	0.422596
Rgs6:ENSMUST00000186458.6	0.583421	0.798106	0.788612	0.753448	0.755099	0.833318	0.662604	0.591988	0.633354	0.505691	0.714721	0.611454	0.52871
Dpp10:ENSMUST00000112606.7	0.324528	0.481395	0.472601	0.572052	0.555556	0.531927	0.380222	0.644231	0.415584	0.327586	0.414634	0.333333	0.314286
Fbxo45:ENSMUST00000042732.5	0.653841	0.518369	0.480642	0.763618	0.360654	0.605025	0.466171	0.90379	0.86694	0.896729	0.906674	0.729439	0.852475
Bag5:ENSMUST00000054636.6	0.412574	0.382495	0.401415	0.434221	0.393024	0.425907	0.358194	0.443044	0.431729	0.494935	0.451552	0.458593	0.403968
Ubxn6:ENSMUST00000019722.11	0.333333	0.796471	0.750284	0.761523	0.786408	0.908331	0.828739	0.962054	0.759638	0.860941	0.73983	0.765176	0.798606
Kcnq5:ENSMUST00000029667.12	0.6	0.883041	0.876461	0.791667	0.708333	0.901948	0.784336	0.949686	0.758621	0.927835	0.895522	0.909091	0.863636
Kctd12:ENSMUST00000184744.1	0.69697	0.653846	0.670427	0.698113	0.62069	0.74355	0.615268	0.666667	0.674102	0.690264	0.698413	0.647976	0.602446
Trp53bp1:ENSMUST00000110647.7	0.464286	0.281871	0.260029	0.402235	0.333333	0.335589	0.175602	0.412658	0.229342	0.28496	0.355882	0.214286	0.312649
Ppid:ENSMUST00000029382.12	0.676871	0.665577	0.604633	0.582426	0.689938	0.688369	0.557711	0.677249	0.590977	0.61169	0.637887	0.504386	0.452002
Cop1:ENSMUST00000076894.10	0.0777923	0.0638682	0.0611662	0.10599	0.0665234	0.0782994	0.0528809	0.105109	0.0955377	0.0866646	0.0749008	0.0778564	0.0623332
Grik2:ENSMUST00000218823.1	0.476905	0.373706	0.380085	0.286899	0.345386	0.408406	0.270429	0.353312	0.395698	0.350037	0.365496	0.291359	0.303041
Dtna:ENSMUST00000221880.1	0.481481	0.170103	0.23108	0.28125	0.255102	0.3776	0.287435	0.177215	0.0907781	0.122186	0.0884211	0.0909091	0.1875
Il6st:ENSMUST00000183663.7	0.71659	0.636344	0.680384	0.657082	0.554917	0.667208	0.403081	0.678618	0.517113	0.512444	0.755552	0.659925	0.314016
Plcb1:ENSMUST00000131552.4	0.75248	0.757394	0.791337	0.783046	0.76116	0.793493	0.66723	NA	0.734067	0.684362	0.719735	0.481838	0.620272
Mon2:ENSMUST00000073792.10	0.256858	0.28637	0.282749	0.327135	0.184067	0.347795	0.22865	0.221723	0.155502	0.163977	0.113268	0.131019	0.171117
Ppp3cb:ENSMUST00000159027.7	0.465091	0.370618	0.367969	0.403565	0.373265	0.336931	0.362399	0.374107	0.42057	0.436524	0.460423	0.447116	0.481565
Acat1:ENSMUST00000034547.5	0.283465	0.389734	0.438886	0.28315	0.326531	0.280702	0.385601	0.402852	0.152358	0.244463	0.35909	0.242884	0.233631
Fam193b:ENSMUST00000225240.2	0.888298	0.811005	0.862406	0.718412	0.795455	0.715143	0.805744	0.618257	0.802561	0.593612	0.826433	0.782609	0.834008
Smim10l1:ENSMUST00000100864.6	0.691227	0.692422	0.686443	0.697728	0.686729	0.60064	0.676713	0.623748	0.660451	0.649666	0.651926	0.650935	0.644117
Aktip:ENSMUST00000120213.8	0.610784	0.585931	0.584119	0.646744	0.595745	0.583776	0.598812	0.650735	0.687455	0.760247	0.635114	0.717676	0.658829
Tex261:ENSMUST00000014892.7	0.42337	0.48416	0.491226	0.374395	0.323846	0.360042	0.436508	0.418756	0.526948	0.411395	0.418305	0.380312	0.40887
Zbtb38:ENSMUST00000152594.7	0.692308	0.589226	0.666905	0.798319	0.580247	0.571714	0.683939	0.701571	0.681013	0.725818	0.69755	0.842857	0.75507
Ypel5:ENSMUST00000045174.6	0.689168	0.656859	0.65271	0.63218	0.674441	0.605747	0.69807	0.684359	0.579449	0.564089	0.58872	0.583987	0.524184
Nfyb:ENSMUST00000130911.7	0.484774	0.603595	0.594269	0.52013	0.561209	0.500187	0.616632	0.552768	0.484803	0.469866	0.477288	0.497432	0.386533
Eid2b:ENSMUST00000094651.3	0.60284	0.828796	0.69717	0.567001	0.697603	0.624733	0.754165	0.626439	0.746236	0.610172	0.856224	0.575862	0.617911
Zfp871:ENSMUST00000159086.9	0.753619	0.734209	0.711771	0.748185	0.600494	0.624105	0.736461	0.52272	0.632577	0.557802	0.681896	0.677223	0.708382
Pcdh19:ENSMUST00000149154.7	0.4	0.466611	0.516142	0.466667	0.385185	0.382624	0.490172	0.6	0.351183	0.325	0.381579	0.3	0.437403
Camk2d:ENSMUST00000066466.12	0.482929	0.48372	0.474399	0.458529	0.449861	0.428916	0.479847	0.441672	0.513524	0.447042	0.456925	0.382909	0.437933
Tsc1:ENSMUST00000028155.11	0.977444	0.940647	0.938909	0.948187	0.923913	0.824534	0.930671	0.867089	0.938462	0.900709	0.936426	0.975904	0.937269
Trim37:ENSMUST00000041282.12	0.904145	0.819568	0.905831	0.608534	0.931034	0.818719	0.956472	0.772455	0.350962	0.248705	0.380259	0.659341	0.401384
Setd1b:ENSMUST00000163030.8	0.58209	0.591195	0.674385	0.572603	0.517007	0.507752	0.610182	0.475728	0.645877	0.583969	0.636895	0.64	0.634637
Mpped2:ENSMUST00000111063.7	0.303694	0.387975	0.377519	0.293184	0.28324	0.276742	0.341101	0.463903	0.354019	0.444453	0.330792	0.23591	0.368636
Scaf1:ENSMUST00000211735.1	0.445205	0.418018	0.46042	0.411141	0.478992	0.318253	0.416773	0.130751	0.442724	0.217391	0.407389	0.473404	0.436235
Hccs:ENSMUST00000033717.8	0.711111	0.677305	0.69164	0.666667	0.573427	0.585414	0.714021	0.612403	0.729039	0.67193	0.694762	0.728188	0.739691
Tpm3:ENSMUST00000118566.7	0.745459	0.756991	0.787342	0.740617	0.805012	0.644769	0.754384	0.679652	0.768872	0.715892	0.762079	0.792821	0.790154
Bod1:ENSMUST00000058060.13	0.288136	0.256944	0.315166	0.300912	0.306667	0.168428	0.273565	0.144481	0.271439	0.145833	0.268179	0.178082	0.277885
Bpnt1:ENSMUST00000027916.12	0.940299	0.91119	0.920768	0.881818	0.854077	0.788868	0.899765	0.846918	0.964371	0.917556	0.893972	0.916667	0.899729
Cdk14:ENSMUST00000115451.7	0.870389	0.940983	0.9272	0.907005	0.842389	0.88585	0.839928	0.937095	0.936341	0.930903	0.900653	0.890683	0.925825
Cxxc4:ENSMUST00000181904.2	0.310392	0.566589	0.603284	0.535303	0.350651	0.455171	0.550267	0.51397	0.334814	0.392983	0.435754	0.530559	0.322421
Exoc3:ENSMUST00000035934.6	0.597878	0.658225	0.639626	0.493395	0.610782	0.568123	0.712055	0.495191	0.435899	0.369569	0.389649	0.333159	0.25766
Cyb5r4:ENSMUST00000168529.8	0.697877	0.686698	0.696719	0.682189	0.661631	0.672637	0.666197	0.649449	0.68699	0.651914	0.654529	0.655984	0.65458
Zfp365:ENSMUST00000064656.7	0.731707	0.74359	0.790886	0.743243	0.705882	0.603246	0.717986	0.67658	0.74744	0.761194	0.807789	0.71875	0.787402
Zcchc3:ENSMUST00000099207.4	0.223443	0.412088	0.433043	0.340659	0.274336	0.260645	0.390752	0.473008	0.354308	0.312367	0.340649	0.422222	0.427602
Actn1:ENSMUST00000021554.15	0.364583	0.411686	0.448751	0.375317	0.48658	0.285855	0.422013	0.222206	0.467196	0.325619	0.406954	0.440634	0.523361
Rnf11:ENSMUST00000030284.9	0.283501	0.324378	0.349852	0.335318	0.328809	0.262428	0.330127	0.353374	0.320754	0.348895	0.337419	0.349912	0.337643
1700025G04Rik:ENSMUST00000044581.13	0.4206	0.377153	0.422289	0.282224	0.308035	0.327983	0.332803	0.249348	0.418834	0.195302	0.165005	0.143754	0.243454
Cbln2:ENSMUST00000068423.9	1	0.659164	0.676151	0.608974	0.544601	0.509755	0.634527	0.687551	0.597561	0.698276	0.678832	0.722222	0.693878
Smarce1:ENSMUST00000103133.3	0.619835	0.771167	0.75277	0.591743	0.666667	0.557806	0.716832	0.658375	0.666667	0.526297	0.716145	0.475728	0.524936
Ncoa7:ENSMUST00000215740.1	0.87018	0.740552	0.750939	0.798238	0.739656	0.66845	0.775021	0.826848	0.798516	0.854288	0.764509	0.791931	0.772706
Plxna1:ENSMUST00000163139.7	0.517544	0.499274	0.563996	0.472637	0.598039	0.366171	0.501162	0.225806	0.543956	0.383333	0.525974	0.547619	0.523077
Gm7324:ENSMUST00000094051.5	0.883408	0.836565	0.878844	0.869198	0.889688	0.649774	0.783967	0.450521	0.857656	0.567745	0.840852	0.845706	0.846887
Slc7a8:ENSMUST00000022787.7	0.833333	0.763345	0.814461	0.8	0.818182	0.600177	0.761676	0.379032	0.816901	0.539474	0.723214	0.773071	0.775229
Sh3gl2:ENSMUST00000030212.14	0.853229	0.862543	0.863666	0.804688	0.839726	0.615288	0.782316	0.888158	0.819277	0.8125	0.730627	0.79661	0.86
Gfer:ENSMUST00000234859.1	0.842105	0.764479	0.783474	0.767986	0.764463	0.586748	0.782944	0.748691	0.769159	0.710145	0.834885	0.743883	0.744596
Odr4:ENSMUST00000111913.8	0.832061	0.860853	0.861658	0.788104	0.888	0.674374	0.881803	0.497608	0.851496	0.486486	0.862547	0.777778	0.799462
Socs5:ENSMUST00000041369.7	0.754967	0.659325	0.674702	0.561086	0.794239	0.516367	0.948782	0.597222	0.807554	0.93985	0.515284	0.880952	0.731421
Cox5b:ENSMUST00000081180.6	0.268411	0.398025	0.3531	0.365664	0.339594	0.102335	0.502338	0.57975	0.409312	0.473463	0.389785	0.405087	0.407803
Prpf4b:ENSMUST00000077853.4	0.57629	0.534689	0.541008	0.544766	0.571265	0.570854	0.534842	0.553883	0.660163	0.554539	0.625065	0.549979	0.569984
Nbdy:ENSMUST00000208373.1	0.53689	0.591124	0.594524	0.56895	0.616129	0.527714	0.561246	0.528668	0.585302	0.525679	0.569091	0.568628	0.569926
Celf2:ENSMUST00000170438.7	0.431825	0.4639	0.436991	0.402088	0.434825	0.427878	0.458267	0.431414	0.423656	0.412266	0.427408	0.357316	0.417783
Mark3:ENSMUST00000084953.12	0.131225	0.111972	0.101728	0.124448	0.156549	0.11026	0.0865263	0.164333	0.112415	0.146604	0.101968	0.145954	0.139235
Plekha1:ENSMUST00000120441.7	0.919739	0.907667	0.908968	0.836023	0.867493	0.874604	0.819005	0.885047	0.904471	0.854513	0.901482	0.820621	0.86828
Myo5a:ENSMUST00000123128.7	0.839524	0.793362	0.818161	0.780624	0.820147	0.779441	0.679882	0.755511	0.730057	0.667019	0.688662	0.550878	0.701844
Atp1b3:ENSMUST00000034983.6	0.797189	0.721695	0.757082	0.780063	0.731235	0.76616	0.656021	0.78604	0.648537	0.753231	0.706465	0.688537	0.746061
Xpr1:ENSMUST00000027741.11	0.921212	0.931772	0.894634	0.94843	0.868056	0.903399	0.804197	0.912424	0.828663	0.842531	0.767241	0.853659	0.826355
Wdfy3:ENSMUST00000053177.13	0.778761	0.738798	0.748526	0.821086	0.735294	0.762701	0.650706	0.812749	0.869522	0.879041	0.882748	0.90458	0.869312
Fzr1:ENSMUST00000140901.7	0.906332	0.932223	0.919703	0.89433	0.920989	0.896219	0.798234	0.875321	0.871447	0.803164	0.907275	0.777638	0.848253
Ssh1:ENSMUST00000159592.7	0.17094	0.313725	0.304441	0.35468	0.230769	0.244848	0.167967	0.282799	0.301131	0.247077	0.320926	0.286957	0.314845
Mia2:ENSMUST00000176464.7	0.854635	0.848178	0.866289	0.766822	0.768984	0.856664	0.736804	0.616362	0.77697	0.559467	0.773964	0.731012	0.717063
Echs1:ENSMUST00000026538.12	0.754601	0.833333	0.82214	0.854664	0.782875	0.80687	0.704126	0.642697	0.828375	0.710114	0.815768	0.82963	0.780959
Tln2:ENSMUST00000040025.13	0.817515	0.776393	0.780703	0.660019	0.738742	0.783171	0.63932	0.582279	0.54491	0.469822	0.535704	0.316993	0.476464
Fundc1:ENSMUST00000026016.12	0.563844	0.541445	0.54031	0.436925	0.47456	0.51037	0.399505	0.502436	0.436243	0.425453	0.469169	0.342989	0.296125
Cacna1g:ENSMUST00000107786.7	0.413125	0.288139	0.349851	0.256277	0.290164	0.287648	0.208074	0.356005	0.33957	0.201043	0.505605	0.41768	0.283775
Syt13:ENSMUST00000028648.2	0.971677	0.967344	0.962155	0.924509	0.903796	0.963281	0.820313	0.979446	0.903021	0.855436	0.931578	0.831433	0.913389
Slc45a4:ENSMUST00000151288.7	0.31405	0.388278	0.406557	0.461538	0.394958	0.418143	0.282922	0.32	0.25283	0.265176	0.247396	0.0942408	0.154286
Magi1:ENSMUST00000203688.2	0.276474	0.303734	0.270948	0.227708	0.220376	0.292007	0.181812	0.279475	0.130625	0.241387	0.244391	0.280744	0.250524
Ccnh:ENSMUST00000164127.7	0.978261	0.762887	0.808732	0.788913	0.623932	0.931715	0.724568	0.254335	0.897345	0.432358	0.797513	0.908333	0.854575
AI854703:ENSMUST00000154570.1	0.666667	0.569588	0.562874	0.378571	0.359788	0.624093	0.419333	0.762887	0.325	0.284345	0.492754	0.352941	0.416667
Slc4a8:ENSMUST00000023776.12	0.900236	0.921517	0.928245	0.783618	0.907769	0.917754	0.755754	0.862553	0.447178	0.48534	0.670612	0.755342	0.666143
Scaper:ENSMUST00000214747.1	0.343915	0.441012	0.508817	0.470588	0.251634	0.491334	0.513589	0.522472	0.473845	0.407246	0.407607	0.30719	0.275676
B3glct:ENSMUST00000100404.5	0.866667	0.775	0.924007	0.743363	0.461538	0.891176	0.872253	0.927711	0.786408	0.805401	0.722449	0.340541	0.639098
Gemin2:ENSMUST00000021379.7	0.73337	0.602972	0.572906	0.714528	0.622583	0.461182	0.664245	0.871245	0.524965	0.808685	0.46582	0.495311	0.55108
Socs1:ENSMUST00000229866.1	0.125	0.355932	0.12426	0.129032	0.475	0.170854	0.0938776	0.681818	0.203125	0.758514	0.146667	0.234043	0.452915
Pex1:ENSMUST00000121291.7	0.842932	0.693587	0.727941	0.848485	0.701493	0.708529	0.657649	0.698925	0.742967	0.810345	0.553459	0.84375	0.863406
Gm2007:ENSMUST00000178133.7	0.301986	0.24092	0.215427	0.259779	0.234031	0.215882	0.250265	0.330824	0.26684	0.292078	0.324955	0.149947	0.15674
Gm11007:ENSMUST00000178120.7	0.303585	0.242095	0.216522	0.263295	0.236271	0.217126	0.251274	0.331721	0.267859	0.293895	0.325262	0.153737	0.158235
Gm4631:ENSMUST00000121393.8	0.31121	0.241019	0.215612	0.261844	0.23375	0.216526	0.250771	0.327249	0.26546	0.293028	0.32322	0.154462	0.158304
Pld5:ENSMUST00000065967.13	0.308325	0.301452	0.287133	0.273253	0.299883	0.252952	0.277037	0.274742	0.312048	0.268171	0.222959	0.385417	0.400628
Isoc1:ENSMUST00000025503.9	0.286822	0.38667	0.426295	0.28765	0.301333	0.345881	0.402398	0.758428	0.530451	0.624988	0.381632	0.332547	0.482218
Bzw2:ENSMUST00000020856.5	0.562963	0.790404	0.805825	0.75987	0.827381	0.753015	0.797634	0.896226	0.811429	0.874773	0.840364	0.803636	0.784091
Mtfr1:ENSMUST00000130645.7	0.511579	0.446258	0.476771	0.649077	0.357057	0.486628	0.531175	0.797732	0.755017	0.737296	0.480187	0.692664	0.582377
B230217C12Rik:ENSMUST00000155954.2	0.139241	0.126524	0.136378	0.0853242	0.1133	0.178831	0.135478	0.559796	0.0835322	0.445378	0.0827068	0.230769	0.0901288
Ppp6r2:ENSMUST00000238818.1	0.744242	0.857883	0.741071	0.569376	0.601495	0.749551	0.72288	0.848008	0.656114	0.780728	0.555	0.488242	0.697788
Ifit1:ENSMUST00000102824.3	0.25	0.625	0.192308	0.153846	0.181818	0.103448	0.148148	0.523504	0.329949	0.289907	0.258065	0.298246	0.236438
Ero1a:ENSMUST00000022378.8	0.833333	0.830435	0.767156	0.640971	0.658625	0.769075	0.759002	0.926689	0.630302	0.732203	0.708962	0.372119	0.624683
Ssr3:ENSMUST00000029414.11	0.894737	0.860858	0.900292	0.868014	0.775934	0.823368	0.822639	0.916136	0.955561	0.948325	0.941176	0.805505	0.822625
Fdx1:ENSMUST00000034552.7	0.478523	0.312735	0.348896	0.276388	0.374638	0.312866	0.294305	0.186934	0.319738	0.205824	0.274887	0.313848	0.305253
Bag4:ENSMUST00000038498.9	0.784918	0.633972	0.708172	0.621668	0.582115	0.642097	0.737201	0.674873	0.477243	0.442498	0.446979	0.349413	0.415856
Nkain1:ENSMUST00000105993.3	0.802787	0.890957	0.903203	0.856176	0.778894	0.913084	0.847665	0.905983	0.875989	0.887097	0.750715	0.806452	0.747573
Cggbp1:ENSMUST00000067744.7	0.809687	0.819454	0.873332	0.759639	0.754714	0.789327	0.783917	0.747963	0.813346	0.719172	0.67876	0.443876	0.620632
Coa7:ENSMUST00000131656.1	0.335596	0.229869	0.242143	0.289662	0.149536	0.205929	0.233456	0.417776	0.227148	0.277639	0.212829	0.191822	0.194443
Macir:ENSMUST00000053033.13	0.742574	0.74031	0.769231	0.711735	0.693694	0.718687	0.727863	0.836134	0.579739	0.662879	0.583837	0.640719	0.618759
Uck2:ENSMUST00000053686.8	0.6375	0.588652	0.674051	0.327217	0.28	0.502712	0.533502	0.691275	0.661202	0.409091	0.543705	0.454545	0.396285
Prxl2c:ENSMUST00000222570.1	0.411601	0.415589	0.443832	0.566808	0.379949	0.541229	0.462488	0.626029	0.551274	0.720313	0.431902	0.456144	0.528191
Armc8:ENSMUST00000185524.6	0.422018	0.443439	0.42723	0.544974	0.37931	0.4355	0.400174	0.547085	0.449275	0.563559	0.466063	0.340426	0.360656
Scaf8:ENSMUST00000076734.7	0.358974	0.307359	0.263366	0.336634	0.278481	0.307054	0.253146	0.488722	0.2	0.424933	0.207587	0.195312	0.182099
Brd7:ENSMUST00000034085.7	0.303765	0.190358	0.185272	0.229951	0.200468	0.22227	0.15372	0.409559	0.171208	0.251021	0.0855944	0.151657	0.118306
Med6:ENSMUST00000161598.7	0.551136	0.140741	0.177007	0.0537634	0.197452	0.2	0.116143	0.446043	0.352861	0.38819	0.318681	0.0677291	0.102665
Eif1ad:ENSMUST00000025759.8	0.0193548	0.0238095	0.0100792	0.0317073	0.0244565	0.00533215	0.027768	0.415423	0.0641248	0.276059	0.184177	0.0378378	0.122843
Mrps23:ENSMUST00000024486.13	0.811468	0.73528	0.767082	0.810956	0.794775	0.727645	0.747411	0.789676	0.812211	0.735804	0.808233	0.744106	0.698814
Ugp2:ENSMUST00000102875.10	0.374309	0.376047	0.379857	0.359264	0.407765	0.410774	0.378874	0.430761	0.404923	0.399417	0.364624	0.362604	0.373275
Gng12:ENSMUST00000043148.12	0.262429	0.359819	0.434183	0.159812	0.292086	0.351772	0.272984	0.543485	0.267004	0.369839	0.209737	0.154958	0.26936
Terf1:ENSMUST00000188371.6	0.308824	0.213333	0.201107	0.132911	0.171717	0.192	0.212278	0.393162	0.164134	0.264758	0.217014	0.0592105	0.0885201
4931428F04Rik:ENSMUST00000212922.1	0.816582	0.615967	0.733915	0.774786	0.644999	0.648701	0.697707	0.662317	0.596197	0.549287	0.666276	0.34695	0.629925
Bves:ENSMUST00000095715.4	0.5	0.574074	0.666667	0.470588	0.444444	0.68	0.560606	0.609907	0.269231	0.3	0.545455	NA	0.375
Lrrc28:ENSMUST00000053950.9	0.648658	0.664366	0.670768	0.654672	0.685938	0.662469	0.661122	0.768592	0.603413	0.671512	0.454379	0.570927	0.44233
Acsl6:ENSMUST00000093106.11	0.564767	0.537313	0.586207	0.437037	0.478632	0.574884	0.574088	0.638614	0.325107	0.333333	0.326996	0.270833	0.271523
Ankrd29:ENSMUST00000118525.8	0.2625	0.318519	0.369702	0.220994	0.314607	0.290323	0.275	0.469136	0.248416	0.358366	0.212963	0.25	0.273913
Retreg1:ENSMUST00000022881.14	0.499505	0.582658	0.553168	0.413135	0.431426	0.46141	0.520104	0.624504	0.481045	0.607161	0.600586	0.440049	0.52489
Trim9:ENSMUST00000167755.2	0.504886	0.451253	0.407753	0.492308	0.530973	0.516354	0.484442	0.588785	0.685878	0.63964	0.407407	0.4	0.404762
Chmp3:ENSMUST00000059462.11	0.396947	0.492941	0.488479	0.500911	0.335385	0.467326	0.388859	0.672269	0.437601	0.502992	0.491445	0.307888	0.296758
Timm50:ENSMUST00000081946.4	0.216374	0.352941	0.383188	0.421225	0.338403	0.417618	0.375555	0.562212	0.441899	0.445157	0.454945	0.382591	0.322196
Papola:ENSMUST00000109901.8	0.566327	0.609948	0.621351	0.491979	0.473054	0.562336	0.606369	0.739259	0.664278	0.724575	0.619048	0.46875	0.584286
Arih2:ENSMUST00000013338.13	0.818182	0.811659	0.85443	0.651852	0.811321	0.817957	0.819837	0.786517	0.849206	0.689884	0.669435	0.630542	0.638081
Sorbs1:ENSMUST00000226047.1	0.524242	0.473451	0.449388	0.403738	0.363636	0.374705	0.405889	0.671355	0.368856	0.633638	0.450166	0.68	0.375561
Mrpl39:ENSMUST00000116584.1	0.27381	0.172297	0.226021	0.15251	0.103774	0.158254	0.158749	0.335766	0.361943	0.123021	0.113626	0.216625	0.176682
Rgmb:ENSMUST00000170578.2	0.546588	0.507452	0.519015	0.425515	0.557893	0.504826	0.575804	0.488858	0.421188	0.41065	0.474854	0.151289	0.294087
Hoxa5:ENSMUST00000048794.6	0	0.3125	0.181818	0	0.206591	0	0	0.630704	0.241176	0.406121	0.306122	NA	0.202899
Nosip:ENSMUST00000003513.10	0.57971	0.628577	0.64503	0.554061	0.585031	0.629106	0.621115	0.643639	0.570243	0.592105	0.576532	0.553735	0.55558
Amdhd2:ENSMUST00000138685.2	0.225146	0.238241	0.262057	0.200859	0.331982	0.15674	0.190353	0.36397	0.154421	0.299954	0.135262	0.181785	0.18687
Abhd5:ENSMUST00000156520.7	0.85272	0.763553	0.870134	0.764435	0.688704	0.817143	0.794054	0.800776	0.604833	0.595306	0.495253	0.528105	0.417161
Optn:ENSMUST00000114996.7	0.488372	0.172638	0.2	0.288136	0.2875	0.225195	0.255208	0.413793	0.169811	0.199541	0.171651	0.0697674	0.13764
Clpb:ENSMUST00000001884.13	0.430866	0.404464	0.397238	0.318961	0.28933	0.434247	0.285898	0.46995	0.290137	0.282406	0.282242	0.110229	0.232371
Nqo2:ENSMUST00000058978.8	0.29593	0.458082	0.469958	0.227081	0.150068	0.346975	0.341417	0.494056	0.380735	0.329832	0.303415	0.272467	0.279502
2810004N23Rik:ENSMUST00000034465.8	0.424242	0.514493	0.537061	0.400552	0.255814	0.402135	0.439869	0.47205	0.487211	0.366721	0.427664	0.20098	0.284703
Nit1:ENSMUST00000111289.7	0.0778443	0.0458937	0.0431034	0.0692771	0.037234	0.0480828	0.0444856	0.341346	0.0361197	0.377086	0.0477833	0.0352423	0.0858034
Nans:ENSMUST00000030018.4	0.249748	0.224479	0.25053	0.271207	0.246952	0.206799	0.243144	0.371231	0.17959	0.330612	0.19836	0.198598	0.175854
Plp1:ENSMUST00000033800.12	0.690176	0.751266	0.731466	0.68415	0.664923	0.703887	0.631978	0.726377	0.707873	0.644323	0.750177	0.710485	0.688399
Cast:ENSMUST00000222588.1	0.7211	0.577748	0.705486	0.512593	0.847872	0.710442	0.764339	0.866995	0.727799	0.832668	0.7211	0.61525	0.673333
Ckap4:ENSMUST00000053871.4	0.772021	0.802348	0.793628	0.733333	0.804878	0.71074	0.764541	0.826599	0.855731	0.842995	0.81592	0.722222	0.802013
Surf4:ENSMUST00000015011.9	0.688254	0.72529	0.706744	0.760458	0.736124	0.707724	0.713548	0.831374	0.757193	0.782444	0.683642	0.702123	0.777861
Cnot6l:ENSMUST00000155901.7	0.275466	0.260074	0.295911	0.273929	0.226975	0.291127	0.306343	0.412539	0.297889	0.404209	0.382589	0.207039	0.285189
Parp8:ENSMUST00000022239.7	0.547344	0.449854	0.399274	0.270223	0.404161	0.392159	0.32353	0.424754	0.183112	0.210771	0.141784	0.129553	0.151751
Wipf1:ENSMUST00000094681.10	NA	0.395188	0.578327	0.629078	0.375	0.765012	0.428584	0.65667	0.544365	0.67916	0.619057	0.600454	0.626384
Dyrk2:ENSMUST00000004281.9	0.666872	0.61366	0.642943	0.678692	0.612494	0.624992	0.684023	0.715011	0.610743	0.666083	0.719211	0.624018	0.634046
Spast:ENSMUST00000024869.7	0.79764	0.662829	0.766215	0.834051	0.701453	0.737715	0.706592	0.766869	0.767615	0.717231	0.646934	0.505425	0.492075
Zfp68:ENSMUST00000110905.8	0.242478	0.334195	0.405485	0.274798	0.270312	0.274769	0.311819	0.307255	0.275883	0.213024	0.183912	0.127986	0.16041
Exoc5:ENSMUST00000162175.8	0.708109	0.690522	0.695055	0.641561	0.652717	0.690801	0.711938	0.658053	0.703836	0.671582	0.655727	0.583466	0.616211
1600014C10Rik:ENSMUST00000178207.7	0.830336	0.870402	0.89304	0.86109	0.797242	0.885555	0.880876	0.921029	0.643765	0.641496	0.718086	0.615671	0.645877
Zfx:ENSMUST00000088102.11	0.424242	0.383562	0.43871	0.632653	0.5	0.441379	0.512213	0.442478	0.688095	0.648936	0.481781	0.476562	0.647388
Dusp11:ENSMUST00000032071.12	0.72053	0.636727	0.622198	0.621254	0.559051	0.697092	0.651053	0.743576	0.566002	0.649856	0.500818	0.272775	0.583221
Wdr4:ENSMUST00000171171.8	0.454545	0.510526	0.549593	0.401709	0.380282	0.433692	0.421163	0.550459	0.472527	0.386768	0.469159	0.346939	0.292079
Slain2:ENSMUST00000144843.7	0.755223	0.753119	0.655156	0.68265	0.691598	0.739933	0.703543	0.691156	0.716622	0.668115	0.662273	0.480849	0.599719
1600012H06Rik:ENSMUST00000052691.8	0.633663	0.407186	0.481802	0.490272	0.533333	0.472091	0.466063	0.695946	0.38918	0.572063	0.47733	0.446384	0.385353
Pkn1:ENSMUST00000005616.15	0.340099	0.485178	0.444333	0.335106	0.475764	0.427954	0.34542	0.492873	0.292874	0.207622	0.224408	0.185992	0.722861
Siah2:ENSMUST00000070368.7	0.867403	0.773399	0.806733	0.820717	0.776471	0.786616	0.721138	0.786667	0.690476	0.650875	0.524915	0.640483	0.550265
Psmd12:ENSMUST00000021063.12	0.543909	0.477114	0.463908	0.470823	0.519763	0.435742	0.481319	0.644979	0.397251	0.525512	0.356632	0.334975	0.341437
Rims2:ENSMUST00000226410.1	0.290385	0.232997	0.212382	0.217687	0.165761	0.16081	0.18877	0.383436	0.177613	0.212291	0.255108	0.272727	0.177215
Mras:ENSMUST00000035045.14	0.844444	0.819887	0.798188	0.738462	0.713004	0.797462	0.781767	0.69657	0.753632	0.603147	0.749601	0.585366	0.615385
Agtpbp1:ENSMUST00000164215.7	0.477459	0.458424	0.45245	0.462185	0.399485	0.48244	0.437269	0.627093	0.348337	0.518453	0.346923	0.419355	0.331361
Maoa:ENSMUST00000026013.5	0.472509	0.569054	0.505254	0.373263	0.443383	0.553582	0.475763	0.564699	0.341561	0.389774	0.438204	0.115867	0.236692
Sesn3:ENSMUST00000208222.1	0.645765	0.78369	0.762914	0.594595	0.668676	0.708182	0.754047	0.646444	0.774906	0.685373	0.682026	0.451085	0.635426
Srd5a3:ENSMUST00000031143.12	0.457627	0.355556	0.481928	0.571429	0.622047	0.506969	0.534222	0.647059	0.552684	0.662835	0.397649	0.596708	0.585752
Fbxl17:ENSMUST00000024761.12	0.536234	0.28892	0.342351	0.425321	0.328878	0.37688	0.309679	0.342597	0.295654	0.32537	0.240442	0.252398	0.293407
Rnh1:ENSMUST00000210314.1	0.504762	0.296167	0.353715	0.261596	0.25817	0.267233	0.396714	0.289703	0.204104	0.162983	0.303186	0.0654835	0.138926
Armc1:ENSMUST00000029125.9	0.439218	0.488742	0.478001	0.395116	0.38611	0.418441	0.46733	0.594483	0.444418	0.538534	0.423006	0.364703	0.392758
Ccny:ENSMUST00000053917.5	0.264228	0.292242	0.330193	0.263182	0.239401	0.3355	0.336897	0.29766	0.30352	0.2994	0.175233	0.261128	0.289506
Rps6kb1:ENSMUST00000154617.7	0.278151	0.226897	0.270343	0.231018	0.205827	0.235514	0.221185	0.323802	0.220006	0.267809	0.268935	0.172135	0.216149
Mapkapk2:ENSMUST00000016672.10	0.0449438	0.0654762	0.0854545	0.106383	0.208333	0.0657277	0.0573188	0.341615	0.0498982	0.14306	0.0492578	0.333333	0.064027
Fmr1:ENSMUST00000088546.11	0.901101	0.919707	0.923778	0.928401	0.837935	0.885061	0.901467	0.859728	0.918073	0.870618	0.922679	0.929878	0.903013
Fam169a:ENSMUST00000169863.8	0.832838	0.669696	0.710596	0.669159	0.610775	0.69279	0.587634	0.746318	0.682343	0.745488	0.631643	0.632664	0.575384
Hectd3:ENSMUST00000050067.9	0.460674	0.259259	0.275717	0.327778	0.352941	0.31185	0.311942	0.40884	0.316742	0.362963	0.301003	0.16	0.262206
Smyd3:ENSMUST00000128302.7	0.420684	0.449403	0.526227	0.146318	0.217553	0.443129	0.326972	0.275416	0.134276	0.0756254	0.109192	0.0478913	0.0878745
Uba5:ENSMUST00000035166.11	0.510852	0.492845	0.503329	0.443153	0.474266	0.488028	0.522182	0.659129	0.438478	0.540267	0.481381	0.413767	0.436446
Mex3b:ENSMUST00000082237.6	0.625	0.569892	0.69145	0.694949	0.727273	0.654369	0.668305	0.870968	0.797546	0.857955	0.772973	0.807692	0.782007
Ecpas:ENSMUST00000102889.9	0.134615	0.130354	0.157505	0.209677	0.136	0.154583	0.113753	0.345404	0.213626	0.341163	0.178718	0.106145	0.174731
Frg1:ENSMUST00000033999.7	0.154545	0.215159	0.19133	0.0581614	0.119481	0.146688	0.127093	0.271739	0.186655	0.150694	0.101726	0.029148	0.0607016
Plxnc1:ENSMUST00000099337.4	0.899083	0.845382	0.867372	0.856061	0.842105	0.877897	0.822262	0.951807	0.766376	0.779661	0.75	0.688312	0.72973
Ythdf2:ENSMUST00000152796.7	0.302083	0.311856	0.324238	0.248577	0.257485	0.213867	0.313356	0.471354	0.382175	0.463758	0.304712	0.401079	0.319062
Clock:ENSMUST00000202651.3	0.540961	0.506098	0.503097	0.550566	0.516795	0.506946	0.500326	0.580962	0.434042	0.472542	0.420469	0.562769	0.404272
Entpd5:ENSMUST00000021662.11	0.623894	0.69861	0.575939	0.542574	0.417403	0.557979	0.547721	0.621688	0.793027	0.564183	0.703917	0.465158	0.607509
Inpp1:ENSMUST00000027271.8	0.230732	0.160994	0.228192	0.168861	0.115476	0.177164	0.199959	0.250366	0.155636	0.213374	0.220963	0.117723	0.200777
Nmrk1:ENSMUST00000159572.8	0.454518	0.476189	0.4913	0.469027	0.641532	0.447563	0.514675	0.542827	0.524606	0.448272	0.457588	0.537263	0.499538
Rspry1:ENSMUST00000060389.9	0.475244	0.536064	0.54616	0.359649	0.445232	0.46069	0.463071	0.528418	0.460165	0.392671	0.515385	0.289018	0.393628
Fxn:ENSMUST00000081333.10	0.14349	0.075795	0.0833426	0.119873	0.0730857	0.0863579	0.0936588	0.11176	0.118209	0.138459	0.100418	0.124736	0.12457
Fam207a:ENSMUST00000045454.8	0.757939	0.653035	0.744631	0.590972	0.714466	0.716397	0.713313	0.794305	0.69386	0.626632	0.614307	0.584007	0.553571
Cnot11:ENSMUST00000161515.7	0.557341	0.741872	0.674163	0.453268	0.52237	0.639919	0.612337	0.65316	0.664367	0.543392	0.391135	0.320198	0.515478
Ier3ip1:ENSMUST00000136800.1	0.39011	0.331897	0.431316	0.405779	0.396836	0.333063	0.357427	0.480072	0.366567	0.430033	0.309186	0.293825	0.326522
Get4:ENSMUST00000026976.11	0.608997	0.46395	0.485378	0.506757	0.5	0.458223	0.488092	0.507752	0.620828	0.493593	0.425265	0.421053	0.476951
Dclk3:ENSMUST00000111879.4	0	0.393035	0.419355	0.352601	0.404092	0.387597	0.354241	0.636364	0.320611	0.509901	0.235294	0.263158	0.393939
Tlcd4:ENSMUST00000128909.7	0.903516	0.886854	0.908619	0.880057	0.877948	0.886893	0.917787	0.811912	0.837401	0.755888	0.713403	0.71704	0.811033
Fut11:ENSMUST00000048016.2	0.753855	0.627685	0.672086	0.684215	0.490881	0.650723	0.640232	0.774608	0.656646	0.699602	0.451697	0.342507	0.484902
Tmem176a:ENSMUST00000101426.10	0.4	0.421245	0.474747	0.133333	0	0.268623	0.0877193	0.492084	0.107889	0.180092	0.048951	0.0450545	0.126186
Nuak1:ENSMUST00000020220.14	0.4	0.429091	0.456454	0.42132	0.414894	0.447663	0.435187	0.679641	0.350685	0.49497	0.43078	0.346687	0.354412
Cmip:ENSMUST00000166750.8	0.609206	0.710051	0.708259	0.618061	0.659989	0.648199	0.651456	0.801629	0.59447	0.73358	0.668927	0.561407	0.632421
Fam177a2:ENSMUST00000177978.2	0.30672	0.270887	0.272369	0.246615	0.246138	0.23	0.274272	0.359433	0.360926	0.329863	0.246001	0.291872	0.24946
B4galt6:ENSMUST00000070080.5	0.856036	0.852609	0.85465	0.84897	0.852176	0.853283	0.746463	0.899631	0.827944	0.8502	0.848695	0.761798	0.81371
Tmem19:ENSMUST00000219890.1	0.686922	0.727757	0.804041	0.604421	0.638814	0.680286	0.695437	0.734221	0.666534	0.65308	0.626877	0.550262	0.553515
Dicer1:ENSMUST00000041987.6	0.817073	0.793651	0.808761	0.79661	0.75	0.754915	0.680138	0.829268	0.663121	0.777344	0.553166	0.53719	0.653302
Tnpo2:ENSMUST00000166592.1	0.684466	0.7	0.74552	0.736181	0.6125	0.648079	0.657992	0.737762	0.72106	0.644262	0.719424	0.757353	0.728132
Wdr70:ENSMUST00000227371.1	0.465116	0.329218	0.387261	0.241486	0.178571	0.274059	0.356571	0.278107	0.144424	0.165301	0.0125761	0.169231	0.160247
Fam177a:ENSMUST00000177768.2	0.303985	0.270694	0.2743	0.245117	0.244249	0.229216	0.275767	0.358301	0.364541	0.328	0.247873	0.289943	0.251414
Gtf3c6:ENSMUST00000217537.1	0.211726	0.0961165	0.112472	0.132985	0.0482907	0.144825	0.111121	0.280293	0.163543	0.170843	0.167545	0.089903	0.095175
Rab3d:ENSMUST00000115351.9	0.484328	0.346553	0.466139	0.472181	0.16866	0.518102	0.49112	0.547415	0.40376	0.332038	0.474227	0.222879	0.323428
Myt1l:ENSMUST00000049784.16	0.27325	0.282528	0.285165	0.28613	0.286861	0.24559	0.277056	0.415098	0.432242	0.441431	0.451584	0.511519	0.42569
Abi2:ENSMUST00000052332.14	0.432916	0.453122	0.459517	0.433629	0.400145	0.425728	0.461004	0.453568	0.454205	0.438483	0.481256	0.443555	0.448119
Casp9:ENSMUST00000097805.10	0.983333	0.953846	0.967213	0.896825	0.941176	0.963046	0.96467	0.966942	0.948478	0.905292	0.895018	0.90678	0.900463
Hdgf:ENSMUST00000005017.14	0.320996	0.444199	0.392647	0.391188	0.351713	0.330012	0.338249	0.484416	0.355492	0.440131	0.413056	0.34891	0.411384
Myo9a:ENSMUST00000136740.7	0.70477	0.735126	0.707659	0.570437	0.721394	0.708393	0.717743	0.712548	0.622432	0.631266	0.672561	0.614998	0.6394
Golga3:ENSMUST00000112512.7	0.366609	0.328189	0.355155	0.306062	0.284645	0.296216	0.281955	0.507438	0.420901	0.587703	0.450733	0.464011	0.428633
Pcdh17:ENSMUST00000071370.6	0.625631	0.502778	0.503925	0.604801	0.448553	0.472214	0.505402	0.589839	0.482405	0.563512	0.551486	0.491242	0.491026
Dennd5b:ENSMUST00000111557.7	0.176692	0.142487	0.213833	0.181208	0.212963	0.165986	0.205291	0.333333	0.146302	0.247059	0.169944	0.0408163	0.132604
Me2:ENSMUST00000025439.4	0.388537	0.51033	0.520127	0.229933	0.264168	0.443258	0.325002	0.519504	0.339859	0.231705	0.190166	0.129019	0.212432
Dlgap1:ENSMUST00000133983.7	0.394481	0.342791	0.382289	0.395203	0.377756	0.373788	0.385205	0.503855	0.333341	0.414222	0.397916	0.317935	0.324134
Cebpd:ENSMUST00000096232.5	0.130435	0.148148	0.275362	0.0357143	0.121212	0.0825243	0.0532883	0.465604	0.0930233	0.438311	0.0869565	0.0566382	0.109121
Kcnb2:ENSMUST00000170146.2	0.615932	0.553091	0.554734	0.470944	0.527614	0.537603	0.510671	0.629227	0.459594	0.673106	0.765736	0.639619	0.515429
Gtpbp8:ENSMUST00000162512.7	0.583469	0.534005	0.580877	0.487788	0.406274	0.509071	0.535142	0.609718	0.557667	0.457669	0.394006	0.289149	0.29784
Med16:ENSMUST00000105378.8	0.585972	0.382971	0.267286	0.253584	0.476629	0.192693	0.251025	0.40354	0.280566	0.257125	0.354464	0.224211	0.184999
Gnpnat1:ENSMUST00000046191.8	0.574792	0.433236	0.462095	0.412273	0.375249	0.490301	0.443363	0.481084	0.488822	0.457493	0.398012	0.443083	0.381492
Pim1:ENSMUST00000024811.8	0.177215	0.306122	0.311355	0.133929	0.185185	0.153846	0.259398	0.345912	0.206186	0.381443	0.166667	0.183594	0.251055
Elapor2:ENSMUST00000115348.8	0.461552	0.271526	0.272433	0.277475	0.291245	0.285854	0.310203	0.34776	0.336927	0.416727	0.324404	0.114205	0.255276
Gosr2:ENSMUST00000021329.13	0.749193	0.831128	0.835004	0.784072	0.673228	0.739961	0.750023	0.847737	0.841438	0.865252	0.754993	0.805919	0.77745
Sel1l:ENSMUST00000021347.11	0.803874	0.704955	0.743602	0.783991	0.70469	0.759179	0.780515	0.799163	0.723838	0.767792	0.691137	0.645475	0.685717
Zbtb25:ENSMUST00000176102.7	0.480769	0.589286	0.67658	0.144654	0.0740741	0.411616	0.271034	0.423841	0.345572	0.146907	0.387019	0.113924	0.193676
Erlec1:ENSMUST00000073192.13	0.271386	0.223708	0.259359	0.148603	0.220828	0.246161	0.18377	0.193613	0.146232	0.0843896	0.0881368	0.0336918	0.0909967
Haus1:ENSMUST00000236234.1	0.482993	0.311404	0.270987	0.266082	0.270588	0.297468	0.237531	0.207792	0.330247	0.223005	0.278364	0.193353	0.212578
Prkar2a:ENSMUST00000035220.11	0.384973	0.42038	0.398908	0.429387	0.402931	0.445641	0.42171	0.640615	0.370698	0.583301	0.493436	0.455056	0.491265
Jmy:ENSMUST00000065537.8	0.775636	0.461079	0.528098	0.660767	0.489842	0.596748	0.424159	0.798374	0.761556	0.880479	0.768414	0.788737	0.852396
Cln8:ENSMUST00000027554.7	0.502066	0.379353	0.420691	0.374618	0.352781	0.477555	0.411606	0.519691	0.359428	0.308037	0.356974	0.278021	0.335453
Fam171b:ENSMUST00000051454.3	0.302387	0.459299	0.473648	0.34192	0.466146	0.416465	0.439805	0.616234	0.371206	0.396792	0.440692	0.482143	0.485507
Smim19:ENSMUST00000163774.2	0.71123	0.714994	0.752505	0.646497	0.744643	0.723823	0.656384	0.856269	0.607566	0.713615	0.612646	0.490654	0.570876
Slc52a2:ENSMUST00000023220.9	0.524258	0.239769	0.319074	0.234434	0.285495	0.328858	0.317362	0.295245	0.186549	0.13836	0.102006	0.0581088	0.117628
Lime1:ENSMUST00000108804.2	0.128205	0.204082	0.15963	0.125424	0.124224	0.136082	0.193737	0.277108	0.162121	0.210428	0.145553	0.261261	0.19213
Nsun5:ENSMUST00000000940.14	0.333333	0.312977	0.282051	0.248555	0.337349	0.306818	0.386454	0.298851	0.511727	0.421348	0.287149	0.282443	0.306849
Rnf214:ENSMUST00000161203.7	0.732119	0.600843	0.576161	0.562117	0.628006	0.609461	0.582844	0.652332	0.677628	0.671146	0.570731	0.584196	0.629888
Psme3:ENSMUST00000019470.13	0.825758	0.776211	0.796006	0.774151	0.717647	0.766791	0.808019	0.822368	0.784775	0.731403	0.654272	0.752914	0.670886
Rbsn:ENSMUST00000014694.10	0.313083	0.255004	0.246389	0.220207	0.28309	0.216865	0.20349	0.407975	0.185678	0.309166	0.207513	0.244291	0.209781
Cd47:ENSMUST00000229101.1	0.343265	0.421229	0.43365	0.293451	0.325892	0.378775	0.403045	0.521649	0.325768	0.350338	0.323625	0.191668	0.279981
Skap2:ENSMUST00000204778.2	0.25	0.375	0.455556	0.4	0.358974	0.428571	0.361084	0.377401	0.386811	0.353052	0.231379	0.177923	0.191693
Sft2d1:ENSMUST00000154553.1	0.338809	0.342928	0.31816	0.338558	0.377931	0.377773	0.352489	0.512887	0.372382	0.452338	0.333675	0.338829	0.36378
Ywhab:ENSMUST00000018470.9	0.870948	0.871065	0.88294	0.790808	0.851055	0.848955	0.869116	0.89976	0.839995	0.804121	0.798749	0.710492	0.698408
Creb3l2:ENSMUST00000041093.5	1	0.924138	0.858108	0.864865	0.925373	0.906158	0.853659	0.909804	0.898704	0.891825	0.774899	0.805263	0.898957
Eif2s2:ENSMUST00000099173.10	0.170588	0.143956	0.146313	0.207767	0.131737	0.155608	0.158664	0.344214	0.280277	0.275445	0.133637	0.122085	0.169837
Ccni:ENSMUST00000058550.14	0.876404	0.855984	0.885909	0.847276	0.761421	0.797635	0.835689	0.934307	0.875712	0.945545	0.920504	0.888418	0.911311
Nus1:ENSMUST00000023830.15	0.597569	0.530648	0.541231	0.490979	0.476579	0.523943	0.517734	0.57022	0.476066	0.502476	0.412144	0.38581	0.433073
D630045J12Rik:ENSMUST00000117556.7	0.660468	0.617455	0.620628	0.660752	0.566991	0.608964	0.6243	0.592958	0.498446	0.493398	0.297116	0.194008	0.331589
Ciao1:ENSMUST00000174030.7	0.179826	0.25861	0.20876	0.164276	0.0999579	0.179032	0.198071	0.318961	0.138513	0.169259	0.119434	0.08227	0.058245
Igsf9b:ENSMUST00000214357.1	0.666667	0.619048	0.371153	0.390244	0.705882	0.486903	0.377201	0.727273	0.654255	0.759455	0.595618	0.6875	0.59322
Nipa2:ENSMUST00000119041.7	0.693788	0.61395	0.663487	0.586874	0.523233	0.54658	0.528892	0.569542	0.685593	0.505949	0.581077	0.560342	0.489934
Uhrf1bp1l:ENSMUST00000020112.6	0.330456	0.290074	0.335644	0.389389	0.323068	0.299396	0.310695	0.436206	0.233175	0.405876	0.331358	0.334239	0.283161
Tmem65:ENSMUST00000072113.5	0.535534	0.560618	0.56623	0.539609	0.49762	0.546774	0.524812	0.515756	0.540826	0.494199	0.329949	0.429511	0.459541
Ncor1:ENSMUST00000101066.9	0.374087	0.299767	0.356074	0.365542	0.267053	0.326344	0.317703	0.354175	0.339948	0.352206	0.292274	0.289159	0.30902
Ankrd50:ENSMUST00000094300.3	0.621165	0.594475	0.628525	0.682299	0.55578	0.588132	0.724752	0.66429	0.658196	0.716611	0.597253	0.604433	0.60172
Prkab2:ENSMUST00000045743.12	0.37931	0.373219	0.36129	0.369565	0.42268	0.327019	0.342853	0.503731	0.301607	0.432203	0.379135	0.318182	0.364865
Ash2l:ENSMUST00000068892.14	0.419736	0.346987	0.326751	0.256622	0.294429	0.337817	0.3233	0.357531	0.300172	0.250288	0.274139	0.193406	0.257803
Lims1:ENSMUST00000020077.10	0.268657	0.418182	0.379032	0.25	0.195122	0.246043	0.362633	0.536885	0.482952	0.454562	0.404896	0.2	0.417977
Tmf1:ENSMUST00000095664.5	0.52441	0.618808	0.612703	0.563584	0.595294	0.613564	0.601087	0.515014	0.535866	0.445632	0.538132	0.476876	0.475677
Prep:ENSMUST00000099858.3	0.246331	0.282157	0.184635	0.113584	0.104821	0.162876	0.138826	0.281336	0.0875657	0.180281	0.0623063	0.0634921	0.0907698
Ccdc117:ENSMUST00000020776.4	0.36991	0.345101	0.267741	0.276573	0.271302	0.274101	0.290075	0.280823	0.312672	0.246297	0.272999	0.265013	0.270705
Sec63:ENSMUST00000019937.4	0.341808	0.373985	0.407625	0.489379	0.421813	0.455741	0.437284	0.487237	0.410192	0.436092	0.344723	0.33969	0.36637
Stx6:ENSMUST00000027743.12	0.238666	0.232578	0.274959	0.243013	0.190562	0.236028	0.236679	0.254571	0.258254	0.24766	0.25105	0.255976	0.257931
Stimate:ENSMUST00000006701.7	0.666601	0.553671	0.52397	0.464621	0.334385	0.466778	0.501967	0.469893	0.480721	0.334891	0.168174	0.341925	0.309172
Trp53rka:ENSMUST00000039007.6	0.797766	0.783958	0.835909	0.816469	0.77001	0.744588	0.762176	0.810545	0.873055	0.851143	0.826647	0.740124	0.792076
Slitrk5:ENSMUST00000042767.8	0.599456	0.393171	0.394166	0.400318	0.46582	0.41186	0.403977	0.485924	0.390195	0.482139	0.46379	0.283426	0.34644
Sv2b:ENSMUST00000165175.7	0.851852	0.862876	0.852221	0.867435	0.853448	0.828897	0.85288	0.885827	0.713311	0.757576	0.763158	0.769231	0.734694
Mgat5:ENSMUST00000038361.10	0.315126	0.303859	0.251847	0.325581	0.251497	0.283175	0.262367	0.395122	0.300587	0.376	0.176796	0.226994	0.3125
Ppil2:ENSMUST00000231712.1	0.465909	0.296748	0.288251	0.132911	0.147368	0.260569	0.221048	0.242647	0.327381	0.2723	0.141422	0.116379	0.19084
Nubp1:ENSMUST00000023146.4	0.5	0.344156	0.371739	0.241176	0.35	0.364676	0.276693	0.382199	0.369748	0.248578	0.287106	0.167224	0.247036
Pspc1:ENSMUST00000022507.12	0.802083	0.757485	0.747723	0.683112	0.704348	0.785441	0.766213	0.791411	0.677419	0.706704	0.690455	0.710145	0.501416
Pdia4:ENSMUST00000077290.8	0.192	0.166333	0.166667	0.125561	0.183824	0.202756	0.194973	0.408228	0.166147	0.290347	0.18376	0.166517	0.162592
Sike1:ENSMUST00000029447.11	0.51005	0.525102	0.539277	0.325663	0.395075	0.441831	0.412407	0.466983	0.363745	0.284199	0.417091	0.154667	0.195581
Crbn:ENSMUST00000013882.9	0.562963	0.296024	0.297935	0.267037	0.344539	0.340439	0.319675	0.433655	0.374535	0.412719	0.255914	0.202907	0.236022
Mzt1:ENSMUST00000042662.9	0.571067	0.554889	0.602675	0.619838	0.588799	0.639386	0.661177	0.553449	0.59382	0.531422	0.453313	0.563086	0.571115
Snx13:ENSMUST00000048519.16	0.735849	0.717718	0.710295	0.676923	0.714286	0.760984	0.776873	0.777778	0.604255	0.674126	0.397152	0.475177	0.684145
Prkaa2:ENSMUST00000030243.7	0.453856	0.469324	0.492299	0.483085	0.347069	0.472646	0.494173	0.596719	0.452181	0.498705	0.559331	0.621947	0.51983
Lmf1:ENSMUST00000063344.14	0.0243902	0.0425532	0.0798722	0.148515	0.170732	0.0885122	0.0862516	0.225	0.025066	0.107062	0.0348139	0.0996979	0.0485651
Colgalt1:ENSMUST00000047903.9	0.35527	0.274562	0.271606	0.285683	0.265305	0.281631	0.265601	0.397089	0.344464	0.293419	0.254415	0.292932	0.293062
Cntn1:ENSMUST00000169825.7	0.670275	0.702277	0.688918	0.657124	0.74101	0.625868	0.663823	0.758753	0.587391	0.587229	0.638521	0.608357	0.63305
Pomt2:ENSMUST00000037788.5	0.636364	0.782258	0.785106	0.779412	0.68	0.792793	0.787456	0.901786	0.868263	0.815868	0.743682	0.727273	0.677778
Slc4a1ap:ENSMUST00000202214.3	0.493403	0.330813	0.310269	0.258352	0.285442	0.31225	0.248816	0.323946	0.402818	0.348126	0.33891	0.292758	0.291714
Tmed7:ENSMUST00000151189.1	0.932367	0.970674	0.966532	0.917012	0.896226	0.957437	0.949645	0.960954	0.850714	0.84662	0.820473	0.76839	0.710414
Gpr85:ENSMUST00000060442.13	0.0788644	0.22973	0.232647	0.15	0.133858	0.165599	0.230017	0.246641	0.180233	0.145522	0.173272	0.25	0.100159
Ttpal:ENSMUST00000171696.7	0.976744	0.933518	0.952348	0.96875	0.810811	0.891808	0.923336	0.952756	0.97	0.952607	0.944262	0.406977	0.891765
Armc10:ENSMUST00000095495.2	0.954595	0.860605	0.870486	0.875379	0.761318	0.787775	0.854745	0.857274	0.92727	0.920366	0.849567	0.831076	0.874103
Ndufaf8:ENSMUST00000106223.3	0.111709	0.104514	0.133278	0.159299	0.119329	0.159313	0.151588	0.411706	0.140515	0.333716	0.179899	0.154331	0.128439
Bend5:ENSMUST00000030274.6	0.75	0.2625	0.18546	0.375	0.542857	0.311828	0.174443	0.430704	0.124088	0.325733	0.139535	0.104651	0.139336
Paqr4:ENSMUST00000024702.4	0.449171	0.480961	0.465461	0.431543	0.372715	0.4831	0.458899	0.42174	0.430695	0.421071	0.37324	0.473638	0.414449
Decr1:ENSMUST00000029877.8	0.108054	0.213579	0.20581	0.0601341	0.0920784	0.1418	0.0766684	0.400867	0.257583	0.223707	0.256568	0.0907486	0.128304
Pex5l:ENSMUST00000108225.9	0.792539	0.702067	0.73327	0.654106	0.655323	0.697226	0.721396	0.663295	0.647375	0.41993	0.582434	0.658488	0.552682
Satb1:ENSMUST00000144331.7	0.238296	0.206834	0.286849	0.227141	0.220896	0.310769	0.256878	0.217326	0.193324	0.209322	0.194436	0.24709	0.228284
Gabpa:ENSMUST00000009120.7	0.943375	0.820713	0.825139	0.765605	0.757576	0.826433	0.837876	0.818085	0.879159	0.8581	0.712378	0.554197	0.860917
Phb:ENSMUST00000125172.7	0.266337	0.317804	0.306362	0.265702	0.288387	0.301693	0.338391	0.462304	0.274919	0.326968	0.240402	0.197821	0.219483
Atcay:ENSMUST00000047408.5	0.794635	0.834527	0.858033	0.739952	0.769707	0.837886	0.840636	0.768263	0.801033	0.733834	0.805523	0.773456	0.738535
Irf2bpl:ENSMUST00000038422.7	0.316358	0.398129	0.371289	0.314815	0.352246	0.356387	0.333276	0.512712	0.463415	0.468606	0.407159	0.396673	0.528251
Zfyve9:ENSMUST00000106658.7	0.222817	0.155119	0.187636	0.185026	0.16481	0.201728	0.193112	0.159979	0.180321	0.18041	0.159514	0.190811	0.196397
Vezt:ENSMUST00000118205.7	0.409877	0.334988	0.345769	0.335715	0.365993	0.365476	0.312392	0.355701	0.247947	0.20023	0.234025	0.135857	0.192122
Insig1:ENSMUST00000059155.10	0.935564	0.918053	0.950561	0.961924	0.915467	0.939637	0.961769	0.902485	0.960713	0.902543	0.877644	0.979808	0.898481
Gpatch11:ENSMUST00000170759.2	0.55279	0.640704	0.653467	0.358062	0.372563	0.416199	0.531626	0.556356	0.387044	0.267996	0.233611	0.0704334	0.171401
Clip4:ENSMUST00000024854.8	0.383562	0.463768	0.496004	0.362595	0.416667	0.418202	0.412333	0.616541	0.416729	0.393939	0.401914	0.366667	0.318681
Cacnb4:ENSMUST00000178799.7	0.37703	0.396267	0.468655	0.406835	0.331127	0.394816	0.403285	0.458818	0.367429	0.404571	0.371348	0.409539	0.400872
Dennd4b:ENSMUST00000129564.7	0.127784	0.134346	0.0803704	0.204538	0.299348	0.14378	0.161963	0.257616	0.306064	0.454856	0.115228	0.185557	0.528823
Dnmt3a:ENSMUST00000020991.14	0.783565	0.763583	0.827522	0.779079	0.761648	0.791953	0.786155	0.68889	0.788266	0.758234	0.82954	0.650483	0.781011
Atp8a2:ENSMUST00000080368.12	0.783295	0.758168	0.799344	0.792787	0.755394	0.825935	0.730952	0.793304	0.690808	0.180224	0.630552	0.524039	0.177152
Pi4k2b:ENSMUST00000031081.10	0.4	0.387755	0.346939	0.267606	0.444444	0.42623	0.377273	0.446602	0.341573	0.337127	0.350168	0.270833	0.318033
Asap1:ENSMUST00000177371.7	0.509804	0.445312	0.452289	0.405751	0.366972	0.438672	0.372356	0.421725	0.410655	0.408284	0.321168	0.310526	0.335467
Tm9sf2:ENSMUST00000026624.10	0.698572	0.75296	0.753772	0.648557	0.599683	0.588136	0.734232	0.708227	0.709207	0.689954	0.654731	0.580841	0.602865
Letm1:ENSMUST00000005431.5	0.161892	0.151156	0.121828	0.0845605	0.11253	0.142859	0.0939709	0.255551	0.12759	0.2706	0.120523	0.0275295	0.077527
Orc4:ENSMUST00000028098.10	0.338765	0.31751	0.343406	0.287084	0.206203	0.323314	0.394716	0.258494	0.307022	0.207326	0.266689	0.153981	0.21806
Fem1a:ENSMUST00000060253.4	0.237778	0.148836	0.176	0.322751	0.298783	0.190608	0.1809	0.255308	0.169747	0.348908	0.0907857	0.153908	0.244308
Grik4:ENSMUST00000114865.7	0.111111	0.383562	0.288696	0.228814	0.230769	0.288591	0.12852	0.545946	0.107317	0.102679	0.184834	0.1	0.133333
Zfp382:ENSMUST00000098596.10	0.890307	0.88998	0.890081	0.794469	0.842246	0.877098	0.872763	0.88687	0.825673	0.775762	0.841514	0.701321	0.759968
Tma16:ENSMUST00000026681.6	0.157095	0.20224	0.280955	0.118625	0.152667	0.224092	0.178356	0.251247	0.193335	0.140418	0.144251	0.077073	0.101957
Arfgef2:ENSMUST00000099078.9	0.863158	0.797101	0.852194	0.810811	0.780822	0.806262	0.806739	0.865285	0.699797	0.735	0.714524	0.731183	0.694823
Ipo7:ENSMUST00000084731.4	0.173402	0.127314	0.128353	0.113911	0.21084	0.130097	0.124599	0.210282	0.101659	0.221303	0.0954036	0.14019	0.122816
Atp8a1:ENSMUST00000135930.7	0.865024	0.770009	0.782777	0.823301	0.787499	0.767178	0.788604	0.762153	0.769929	0.729957	0.75707	0.728441	0.776815
Snw1:ENSMUST00000021428.8	0.656151	0.739421	0.689007	0.656895	0.736842	0.657586	0.663868	0.746736	0.685229	0.699953	0.621208	0.623211	0.66281
Gcc1:ENSMUST00000090511.3	0.140351	0.127907	0.100694	0.0555556	0.107143	0.100467	0.0292479	0.327103	0.114943	0.121005	0.243464	0.0357143	0.0712909
Mthfsd:ENSMUST00000047282.11	0.212683	0.108979	0.178605	0.176782	0.148113	0.156131	0.16387	0.135451	0.240076	0.151156	0.140266	0.090535	0.109627
Phospho2:ENSMUST00000028494.8	0.741667	0.793684	0.813008	0.71521	0.688525	0.750287	0.778674	0.872642	0.80226	0.694373	0.741221	0.575646	0.628655
Tmem106b:ENSMUST00000031556.13	0.917345	0.882249	0.931245	0.723862	0.835956	0.911427	0.918054	0.819615	0.777055	0.671115	0.608896	0.39766	0.668669
Ddost:ENSMUST00000030538.4	0.35443	0.41184	0.485194	0.340812	0.505102	0.434247	0.419543	0.407343	0.360749	0.340217	0.426233	0.228946	0.303518
Rbl2:ENSMUST00000034091.7	0.830831	0.721841	0.6718	0.703414	0.721959	0.669195	0.647965	0.698408	0.62965	0.691111	0.629884	0.662491	0.660951
Mapk8:ENSMUST00000111945.8	0.624614	0.571253	0.570057	0.502111	0.588066	0.616614	0.607617	0.627763	0.474905	0.540649	0.50418	0.362698	0.450649
Cdc37l1:ENSMUST00000050148.4	0.549525	0.440802	0.477212	0.391307	0.463957	0.422055	0.468133	0.346733	0.448082	0.340882	0.38129	0.323683	0.39634
Isy1:ENSMUST00000089497.6	0.507656	0.525499	0.55504	0.294213	0.261856	0.42971	0.499301	0.36264	0.426558	0.205461	0.266368	0.194272	0.256711
Abhd10:ENSMUST00000066983.12	0.222129	0.352595	0.350795	0.161271	0.152776	0.291731	0.268027	0.514204	0.281479	0.248322	0.245023	0.0754687	0.139415
Pea15a:ENSMUST00000013842.11	0.252143	0.28308	0.247956	0.334908	0.236887	0.224465	0.273302	0.398256	0.828425	0.81024	0.63182	0.801296	0.680873
Zfp277:ENSMUST00000069692.9	0.372093	0.288136	0.417722	0.131105	0.215385	0.325039	0.22501	0.376068	0.141414	0.20597	0.171247	0.0979228	0.129944
Pex19:ENSMUST00000111252.3	0.394472	0.407351	0.377145	0.426901	0.370166	0.345286	0.301709	0.540481	0.351579	0.412195	0.366193	0.346639	0.354899
Tbx3:ENSMUST00000121021.7	NA	0.898827	0.687846	1	1	0.919062	0.799459	0.79738	0.75	0.767765	0.0886282	0.79933	0.777696
Pura:ENSMUST00000051301.5	0.215627	0.196369	0.201918	0.204484	0.191298	0.164374	0.17549	0.214152	0.240975	0.235499	0.266224	0.220063	0.208557
Med13l:ENSMUST00000100816.7	0.414823	0.431305	0.434525	0.446419	0.364909	0.399491	0.420347	0.535594	0.47663	0.558617	0.460202	0.445733	0.456252
Gucd1:ENSMUST00000039796.13	0.171429	0.0972222	0.0853432	0.0254777	0.15	0.154185	0.0856839	0.189394	0.126797	0.181818	0.0435281	0.032	0.090106
Ubxn4:ENSMUST00000027592.5	0.373858	0.404405	0.390179	0.30513	0.327343	0.419955	0.371696	0.478764	0.356004	0.423006	0.442128	0.2578	0.310549
Pkia:ENSMUST00000028999.11	0.827083	0.862416	0.851932	0.796644	0.894144	0.871123	0.863206	0.939044	0.8928	0.902296	0.880779	0.821429	0.908046
Tent2:ENSMUST00000225868.1	0.693878	0.701613	0.747788	0.636364	0.571429	0.72296	0.766745	0.549784	0.667582	0.57024	0.511983	0.498829	0.38526
Ankrd13c:ENSMUST00000040787.12	0.84922	0.886732	0.900968	0.845312	0.817823	0.864357	0.893448	0.844795	0.894081	0.793583	0.854063	0.752219	0.69795
Strip2:ENSMUST00000046028.11	0.898551	0.824	0.893443	0.865854	0.777778	0.911017	0.863419	0.926667	0.870588	0.90625	0.846154	1	0.7
Arl4a:ENSMUST00000146905.1	0.256927	0.175786	0.218505	0.20316	0.108504	0.204536	0.187934	0.211777	0.161111	0.137552	0.107503	0.0737327	0.0488644
Pdzd8:ENSMUST00000099274.3	0.477741	0.355815	0.362943	0.405438	0.40152	0.390356	0.363306	0.3898	0.319243	0.384434	0.387687	0.375698	0.350157
Ppp2r2c:ENSMUST00000031003.10	0.528275	0.546009	0.533678	0.631667	0.511286	0.555722	0.535311	0.655853	0.551933	0.568475	0.661991	0.445714	0.469799
Lrrc59:ENSMUST00000021239.6	0.905775	0.887898	0.912945	0.849123	0.866348	0.889599	0.912216	0.846154	0.928876	0.8586	0.886969	0.832781	0.845619
Tshz3:ENSMUST00000021641.7	0.51299	0.546818	0.550782	0.564733	0.621954	0.584308	0.59535	0.644722	0.593464	0.673578	0.590262	0.631245	0.587228
Poldip2:ENSMUST00000001127.10	0.727802	0.742007	0.756999	0.771617	0.739623	0.733539	0.75891	0.763341	0.767806	0.745667	0.777183	0.690994	0.655403
Lactb2:ENSMUST00000027071.6	0.361032	0.481765	0.441375	0.395007	0.378608	0.392039	0.392025	0.303534	0.208498	0.151678	0.205922	0.129921	0.150164
Arid2:ENSMUST00000096250.4	0.304408	0.334377	0.357666	0.314052	0.308801	0.352487	0.334926	0.366444	0.317177	0.345121	0.360191	0.387637	0.347546
Nlgn3:ENSMUST00000118111.7	0.659521	0.560901	0.566715	0.611426	0.591179	0.546231	0.580788	0.607682	0.473458	0.510888	0.495432	0.59842	0.587937
Snrnp48:ENSMUST00000091641.12	0.280374	0.299145	0.329962	0.23913	0.257143	0.317043	0.30156	0.292035	0.307033	0.291883	0.290009	0.203488	0.163121
Rhoq:ENSMUST00000024956.14	0.645161	0.452532	0.561662	0.660714	0.614458	0.58693	0.653689	0.696386	0.762139	0.772814	0.718056	0.848592	0.729508
Ina:ENSMUST00000037636.3	0.608485	0.650855	0.686054	0.559441	0.600814	0.596933	0.584571	0.636222	0.642361	0.590116	0.615321	0.544304	0.637931
Atf2:ENSMUST00000112010.8	0.584381	0.535612	0.534795	0.515717	0.533719	0.534263	0.522235	0.577976	0.507113	0.52956	0.475669	0.474094	0.508712
Gigyf1:ENSMUST00000031727.9	0.185345	0.178506	0.202782	0.121673	0.122995	0.217033	0.197103	0.313099	0.221194	0.278402	0.178344	0.217949	0.201893
Ccdc50:ENSMUST00000100026.9	0.86356	0.919473	0.923681	0.722959	0.756422	0.830809	0.863261	0.849513	0.796986	0.776213	0.822154	0.595615	0.68943
Czib:ENSMUST00000106727.9	0.172897	0.221987	0.226168	0.166316	0.159864	0.171502	0.249475	0.347267	0.218432	0.280069	0.170178	0.211236	0.17885
Mlst8:ENSMUST00000234941.1	0.945946	0.816425	0.835648	0.865248	0.794872	0.815545	0.822443	0.866667	0.921933	0.835443	0.892079	0.787234	0.844765
Smc6:ENSMUST00000020931.5	0.415842	0.338462	0.346774	0.272727	0.242857	0.354988	0.309524	0.288066	0.388672	0.40309	0.287841	0.361905	0.393688
Ddx25:ENSMUST00000034612.6	0.0266667	0.0715288	0.153635	0.0555556	0.0503356	0.104356	0.0282294	0.202614	0.0707071	0.0204082	0.0636364	0	0.0487805
Ssbp3:ENSMUST00000030367.14	0.293269	0.286747	0.303609	0.352871	0.244161	0.303467	0.256034	0.373276	0.254208	0.355638	0.299338	0.288462	0.26193
Ankrd39:ENSMUST00000194894.3	0.464567	0.373494	0.455657	0.300813	0.399061	0.373391	0.444751	0.441281	0.365123	0.302041	0.315641	0.195876	0.240876
Jak2:ENSMUST00000025705.6	0.681818	0.645567	0.648865	0.695098	0.618773	0.706004	0.582412	0.690358	0.575409	0.69189	0.405872	0.628177	0.705513
Coa5:ENSMUST00000027286.6	0.889655	0.725726	0.836329	0.863158	0.766839	0.755165	0.763412	0.770992	0.926509	0.895587	0.764444	0.74734	0.816583
Ddi2:ENSMUST00000102484.4	0.654875	0.672387	0.616747	0.565954	0.468602	0.622988	0.662328	0.722234	0.688376	0.586306	0.636473	0.541133	0.677925
2610044O15Rik8:ENSMUST00000190157.6	0.80303	0.796117	0.836331	0.868613	0.746479	0.804878	0.795175	0.934066	0.830247	0.798077	0.767188	0.857143	0.701149
Efhd2:ENSMUST00000036854.3	0.939716	0.95584	0.961219	0.938287	0.940678	0.944096	0.960615	0.948805	0.944247	0.950173	0.86253	0.958131	0.926124
Riok2:ENSMUST00000024620.7	0.180556	0.132911	0.0986717	0.216783	0.0987654	0.119967	0.13213	0.191304	0.227823	0.303371	0.0728261	0.11236	0.254642
Ptar1:ENSMUST00000237333.1	0.91094	0.906641	0.924882	0.888534	0.917343	0.893588	0.906867	0.890192	0.883586	0.863184	0.881866	0.575677	0.793993
Azi2:ENSMUST00000044454.11	0.322201	0.32463	0.317511	0.299744	0.272864	0.308801	0.310974	0.291367	0.336531	0.307294	0.309572	0.315211	0.30345
Slc17a5:ENSMUST00000052441.11	0.406593	0.370242	0.431387	0.304348	0.273585	0.365338	0.367516	0.561111	0.512426	0.511594	0.49283	0.288043	0.451155
Syf2:ENSMUST00000030622.2	0.797297	0.757143	0.75516	0.794708	0.793651	0.752146	0.835679	0.815703	0.864742	0.84311	0.776564	0.823881	0.811811
Kmt2c:ENSMUST00000045291.13	0.497561	0.391863	0.411343	0.441096	0.5	0.383984	0.469777	0.651297	0.421208	0.599327	0.432556	0.46087	0.519874
Rap2c:ENSMUST00000053593.7	0.866667	0.700573	0.741342	0.875769	0.817856	0.704618	0.784205	0.726337	0.781531	0.872721	0.76844	0.643984	0.734526
Ankrd17:ENSMUST00000014421.14	0.211937	0.148108	0.147394	0.187666	0.140205	0.149047	0.166194	0.19098	0.153864	0.25019	0.15464	0.192329	0.273776
Rbm34:ENSMUST00000045994.7	0.188015	0.31376	0.307581	0.155875	0.136238	0.1991	0.214852	0.369171	0.216187	0.215749	0.247568	0.0902292	0.110887
Rsrc1:ENSMUST00000161726.1	0.754468	0.710128	0.731695	0.689561	0.687997	0.720556	0.65714	0.852416	0.625133	0.718969	0.514236	0.636455	0.49789
Rpp14:ENSMUST00000023924.3	0.539435	0.471713	0.48666	0.48997	0.423303	0.449546	0.502336	0.559549	0.470714	0.493208	0.348557	0.30234	0.327674
Ska2:ENSMUST00000020794.5	0.620541	0.457646	0.492087	0.529191	0.384783	0.488462	0.54636	0.568949	0.676739	0.552858	0.636363	0.419287	0.51055
Ddx55:ENSMUST00000071057.13	0.348315	0.350962	0.313501	0.351852	0.351064	0.367832	0.327844	0.405172	0.34	0.327138	0.291667	0.288136	0.313993
Lsamp:ENSMUST00000099761.9	0.616159	0.696659	0.766076	0.523069	0.606589	0.705637	0.713009	0.62409	0.240508	0.264968	0.316593	0.420215	0.43419
Nudt4:ENSMUST00000020217.6	0.852792	0.883941	0.907378	0.821678	0.802857	0.884047	0.891583	0.905724	0.830983	0.803645	0.841481	0.759649	0.800838
Snx16:ENSMUST00000099223.10	0.325551	0.349623	0.3829	0.263725	0.346208	0.321718	0.340347	0.424054	0.2451	0.339082	0.298834	0.253841	0.259076
Irak1bp1:ENSMUST00000113245.8	0.0923913	0.0858283	0.0674807	0.08413	0.0707965	0.157871	0.0599982	0.219048	0.0667244	0.122266	0.0878713	0.0487805	0.0698925
Znrf1:ENSMUST00000171182.7	0.326326	0.257217	0.31308	0.259167	0.233146	0.28077	0.248241	0.308428	0.237957	0.191964	0.152975	0.131616	0.151413
Zfp593:ENSMUST00000030644.7	0.372549	0.285199	0.353752	0.297935	0.306306	0.272242	0.232844	0.34375	0.457086	0.341518	0.408112	0.348958	0.261667
Heatr3:ENSMUST00000034079.13	0.297458	0.278302	0.232616	0.201926	0.292122	0.239511	0.218734	0.30738	0.222711	0.226497	0.16272	0.178772	0.227976
Abi1:ENSMUST00000126112.7	0.480713	0.544396	0.516	0.505012	0.421619	0.527896	0.485941	0.501335	0.58662	0.573968	0.542598	0.534333	0.601146
Paqr7:ENSMUST00000095074.3	0.15493	0.0827338	0.119311	0.031746	0.04375	0.117387	0.0909414	0.242991	0.044796	0.126453	0.0128205	0.0171306	0.033701
Atp2b1:ENSMUST00000020107.7	0.369171	0.286492	0.308389	0.386083	0.336556	0.342863	0.335059	0.46311	0.318613	0.434349	0.35145	0.30345	0.384497
Tox4:ENSMUST00000022766.7	0.457027	0.448425	0.45104	0.422639	0.41846	0.456237	0.410402	0.554769	0.501646	0.512216	0.488164	0.412506	0.480746
Ddx3x:ENSMUST00000000804.6	0.731023	0.699611	0.728053	0.714013	0.625954	0.692768	0.718234	0.785834	0.649782	0.740132	0.703871	0.672601	0.715016
Man1c1:ENSMUST00000054096.12	0.606299	0.631206	0.578125	0.635135	0.656863	0.596138	0.534672	0.621053	0.562317	0.520792	0.37355	0.366834	0.471134
Fh1:ENSMUST00000027810.13	0.12	0.15879	0.174753	0.0457516	0.12749	0.132128	0.129649	0.193548	0.0250537	0.0164474	0.0305768	0.0154867	0.0141264
Agfg1:ENSMUST00000189220.6	0.691636	0.60595	0.572265	0.603525	0.535445	0.645442	0.609124	0.523455	0.627989	0.438018	0.460337	0.410588	0.350703
Sh2b3:ENSMUST00000086310.7	0.515625	0.3375	0.369231	0.622222	0.369565	0.388571	0.304561	0.401914	0.441718	0.63253	0.461111	0.765363	0.735971
Vps36:ENSMUST00000033866.8	0.494521	0.582354	0.624452	0.325393	0.340519	0.515235	0.635949	0.603088	0.590123	0.45619	0.367792	0.367448	0.25795
Nudt5:ENSMUST00000026927.9	0.0655738	0.169082	0.222222	0.0725995	0.05625	0.156966	0.13633	0.27907	0.21419	0.157895	0.0897666	0.091358	0.094804
Pigc:ENSMUST00000111594.2	0.323944	0.304688	0.285714	0.133333	0.196721	0.257618	0.263263	0.215517	0.151899	0.102975	0.0595383	0.0180505	0.0691643
Smc6:ENSMUST00000218866.1	0.03	0.342466	0.417989	0.165939	0.0526316	0.0948012	0.154521	0.266667	0.267606	0.221386	0.271132	0.237037	0.242563
Nit2:ENSMUST00000023432.9	0.521739	0.229947	0.292758	0.463576	0.1875	0.192469	0.27008	0.272109	0.530612	0.477477	0.473856	0.259928	0.388013
Vapb:ENSMUST00000067530.5	0.181058	0.131349	0.126357	0.0740276	0.0945736	0.101942	0.0811803	0.183181	0.0829787	0.0597876	0.0649902	0.0165631	0.0319834
Dr1:ENSMUST00000031190.4	0.958904	0.944056	0.979537	0.967427	0.87013	0.963744	0.950505	0.943262	0.970356	0.953861	0.915757	0.958974	0.946454
Micos13:ENSMUST00000052832.5	0.228487	0.17572	0.230037	0.2022	0.230117	0.178174	0.226438	0.352144	0.207223	0.287998	0.214159	0.209422	0.208945
Rabgap1l:ENSMUST00000028052.11	0.961653	0.951078	0.948734	0.887757	0.934974	0.952017	0.937687	0.973832	0.850697	0.87352	0.822197	0.803616	0.790099
Hecw1:ENSMUST00000110516.2	0.47541	0.380776	0.420493	0.46904	0.407407	0.350649	0.396819	0.568889	0.390244	0.368421	0.358209	0.368421	0.516129
Tbrg4:ENSMUST00000189268.6	0.694444	0.735537	0.739965	0.552817	0.67619	0.699608	0.69476	0.715278	0.656352	0.573494	0.542525	0.34127	0.529018
Slc36a4:ENSMUST00000115588.7	0.840909	0.916272	0.943446	0.75	0.894737	0.837662	0.886133	0.910165	0.822642	0.827511	0.848656	0.56338	0.813665
Alyref:ENSMUST00000026125.2	0.207407	0.123932	0.19279	0.0824176	0.0747126	0.100487	0.0899415	0.207746	0.0537065	0.049373	0.0442943	0.0292398	0.0263345
Aldh7a1:ENSMUST00000174518.7	0.45098	0.308824	0.299115	0.143564	0.202532	0.252859	0.158262	0.302885	0.344082	0.218766	0.312609	0.123457	0.160075
Tnrc6c:ENSMUST00000106344.7	0.194767	0.157773	0.156237	0.215094	0.168459	0.17731	0.202551	0.40276	0.180824	0.367752	0.262972	0.208122	0.230769
Bdnf:ENSMUST00000053317.11	0.112241	0.167273	0.170528	0.106579	0.105989	0.157533	0.152341	0.204812	0.114871	0.154425	0.14416	0.143546	0.142572
Akirin2:ENSMUST00000084299.5	0.402406	0.326604	0.326629	0.308681	0.260975	0.354682	0.293688	0.40421	0.371046	0.355545	0.304565	0.25262	0.297104
Ino80e:ENSMUST00000050833.13	0.203509	0.225859	0.1971	0.254986	0.155022	0.189336	0.157604	0.315789	0.246733	0.211259	0.222956	0.225746	0.212338
Lix1:ENSMUST00000115576.2	0.5	0.558348	0.652356	0.55168	0.402061	0.546057	0.577551	0.618626	0.676118	0.537105	0.557549	0.409546	0.490903
Vps37a:ENSMUST00000098817.3	0.731029	0.727968	0.730114	0.520615	0.563518	0.70121	0.620491	0.672004	0.686774	0.507962	0.583728	0.278779	0.470751
Wwp2:ENSMUST00000166615.2	0.502622	0.521233	0.505805	0.43569	0.542769	0.481815	0.44879	0.533842	0.330835	0.425248	0.333163	0.242413	0.322219
Eif2s1:ENSMUST00000071230.7	0.210744	0.201271	0.191876	0.0876437	0.0835735	0.103201	0.152459	0.190217	0.122433	0.102148	0.10613	0.0338078	0.0680949
Stk39:ENSMUST00000102715.3	0.717557	0.71949	0.787094	0.705607	0.752381	0.687015	0.755679	0.795082	0.585612	0.727273	0.744931	0.608696	0.60091
Ppp3ca:ENSMUST00000070198.13	0.273288	0.270377	0.294337	0.264175	0.233617	0.287573	0.291705	0.349216	0.261992	0.311543	0.310965	0.232345	0.29068
Zfp651:ENSMUST00000093772.3	0.366648	0.257834	0.330438	0.39339	0.277605	0.337262	0.344293	0.269437	0.367908	0.312485	0.458759	0.424295	0.274285
Ppt1:ENSMUST00000030412.10	0.895458	0.831284	0.876224	0.850965	0.824744	0.794156	0.764651	0.868967	0.924257	0.881569	0.751564	0.667752	0.86947
Nampt:ENSMUST00000020886.8	0.585623	0.658937	0.671506	0.46046	0.563162	0.684176	0.570254	0.476065	0.457438	0.317574	0.348741	0.230334	0.341331
Suds3:ENSMUST00000086471.11	0.50753	0.424749	0.426609	0.541436	0.363481	0.418021	0.474222	0.459854	0.483383	0.544554	0.364738	0.483688	0.484129
Nrip1:ENSMUST00000121927.7	0.289851	0.315019	0.350712	0.357121	0.222625	0.306942	0.314917	0.460421	0.276451	0.329073	0.340271	0.299947	0.266747
Rrm2b:ENSMUST00000022901.15	0.84375	0.908696	0.951134	0.80597	0.84127	0.856604	0.91079	0.911458	0.936	0.878125	0.914784	0.907407	0.878698
Sypl:ENSMUST00000076698.12	0.30967	0.150274	0.208546	0.169572	0.130523	0.229906	0.161338	0.235498	0.145101	0.125642	0.149315	0.0409746	0.133728
Appl1:ENSMUST00000036570.4	0.744322	0.670605	0.629873	0.60093	0.616001	0.61844	0.610723	0.601983	0.662691	0.644337	0.603978	0.570095	0.584037
Atp2c1:ENSMUST00000112558.9	0.513731	0.43149	0.461556	0.434792	0.39794	0.473071	0.376656	0.508174	0.473275	0.345984	0.370371	0.302905	0.427483
Senp2:ENSMUST00000023561.7	0.417073	0.398829	0.389804	0.376673	0.407147	0.441242	0.366552	0.430022	0.340444	0.32185	0.356307	0.211007	0.217908
Gnb4:ENSMUST00000155737.7	0.152154	0.271037	0.277029	0.219683	0.210493	0.227244	0.294661	0.322725	0.246029	0.225949	0.252746	0.188373	0.198232
Dph3:ENSMUST00000067955.11	0.317324	0.261464	0.285623	0.220034	0.20297	0.227767	0.190468	0.395257	0.120365	0.208228	0.101901	0.0895197	0.0919924
Ing4:ENSMUST00000032480.13	0.619231	0.549865	0.536295	0.630573	0.589286	0.564167	0.577739	0.599138	0.580834	0.61857	0.543443	0.577002	0.509664
Jpt2:ENSMUST00000024981.8	0.882408	0.777939	0.790413	0.83425	0.54469	0.723601	0.682534	0.825463	0.850371	0.841027	0.840231	0.81441	0.80902
Srr:ENSMUST00000065211.8	0.752577	0.593035	0.578737	0.515037	0.582251	0.560764	0.635943	0.642155	0.495234	0.418867	0.541471	0.372197	0.357523
Rchy1:ENSMUST00000031345.14	0.241712	0.153476	0.1656	0.145124	0.151167	0.16488	0.200106	0.264593	0.20216	0.221494	0.168594	0.155121	0.185802
Tmem63c:ENSMUST00000131878.1	0.84898	0.693182	0.677485	0.865979	0.707547	0.722148	0.699723	0.771772	0.735294	0.75	0.473684	0.625	0.5
Commd6:ENSMUST00000100339.8	0.216345	0.258942	0.291887	0.222276	0.303194	0.264858	0.280515	0.276726	0.258097	0.279103	0.248789	0.22688	0.212888
Plpp6:ENSMUST00000045674.3	0.906077	0.872727	0.921123	0.786765	0.777778	0.835122	0.853036	0.851064	0.780362	0.669145	0.71808	0.666667	0.676623
Kcnj12:ENSMUST00000089184.10	0.492437	0.510056	0.599992	0.474624	0.389575	0.510349	0.455553	0.564472	0.51435	0.441688	0.384587	0.394424	0.384029
Ubac2:ENSMUST00000039803.6	0.815166	0.832237	0.81278	0.793522	0.768473	0.781881	0.792098	0.789116	0.739955	0.729676	0.665473	0.708419	0.692958
Csad:ENSMUST00000023805.2	0.398058	0.427027	0.454927	0.342857	0.411765	0.382979	0.337784	0.5	0.41862	0.450867	0.418263	0.34103	0.39031
Exosc1:ENSMUST00000112123.3	0.0430622	0.0774648	0.0914479	0.0765027	0.092827	0.0808458	0.0487738	0.21028	0.0603205	0.117255	0.0360688	0.02457	0.0379418
Pole3:ENSMUST00000030091.9	0.715447	0.550562	0.64919	0.686081	0.552189	0.606143	0.620937	0.717718	0.702002	0.717589	0.631298	0.622896	0.566434
Clmp:ENSMUST00000034522.7	0.491887	0.516665	0.503456	0.479882	0.413967	0.424242	0.444661	0.483519	0.414958	0.367671	0.462814	0.358919	0.331638
Fads3:ENSMUST00000115995.3	0.348988	0.397226	0.434809	0.237099	0.27326	0.360658	0.373884	0.522334	0.236043	0.265958	0.244799	0.346671	0.311131
Mterf4:ENSMUST00000027492.13	0.153846	0.0837989	0.0961887	0.044898	0.0879121	0.0893082	0.109903	0.181818	0.108742	0.141066	0.0738786	0.00952381	0.0428135
Irak1:ENSMUST00000114354.9	0.299856	0.311953	0.337121	0.401625	0.297076	0.323948	0.31481	0.482052	0.350441	0.486413	0.386449	0.395649	0.43351
Tada2b:ENSMUST00000031097.7	0.914894	0.8625	0.907407	0.944444	0.875	0.910973	0.89454	0.939024	0.896373	0.927136	0.875562	0.860465	0.862534
Samhd1:ENSMUST00000057725.9	0.795455	0.931818	0.908451	0.819149	0.868421	0.899083	0.871345	0.957447	0.723906	0.755167	0.690217	0.477823	0.619238
Tpgs2:ENSMUST00000115817.2	0.0569106	0.0633947	0.0811117	0.0236967	0.0344828	0.0509073	0.0498036	0.153734	0.0611643	0.0793529	0.0433709	0.0394737	0.0413589
Coq4:ENSMUST00000028137.9	0.335584	0.28472	0.306328	0.250269	0.26234	0.280315	0.245584	0.23344	0.309652	0.260068	0.271892	0.353295	0.264227
Acbd5:ENSMUST00000228050.1	0.54615	0.581628	0.580327	0.532289	0.569085	0.579381	0.579796	0.578206	0.574566	0.533243	0.575197	0.534468	0.515534
9330159F19Rik:ENSMUST00000092627.5	0.483569	0.315684	0.307934	0.411254	0.338899	0.37967	0.303863	0.340326	0.347914	0.286543	0.359749	0.303869	0.320003
Mtfr1l:ENSMUST00000102550.9	0.758985	0.676012	0.707738	0.74359	0.743409	0.709341	0.757911	0.728643	0.635889	0.741157	0.581327	0.665963	0.685429
Uri1:ENSMUST00000085513.5	0.535236	0.588297	0.615272	0.484926	0.529763	0.534631	0.544201	0.635987	0.540031	0.565642	0.64236	0.403816	0.462338
Prkaa1:ENSMUST00000051186.8	0.834789	0.86295	0.844837	0.836419	0.842778	0.82566	0.854945	0.884476	0.883996	0.862504	0.849309	0.731008	0.760117
Eif2d:ENSMUST00000068805.13	0.479592	0.162393	0.165618	0.0821256	0.121212	0.202808	0.109209	0.14433	0.0667904	0.0284738	0.0333692	0.00684932	0.0146819
Kdm5c:ENSMUST00000112588.8	0.360478	0.409882	0.427118	0.409464	0.169815	0.339485	0.272644	0.320991	0.326178	0.255813	0.267157	0.269392	0.29195
Dcaf12l1:ENSMUST00000115056.1	0.666667	0.712435	0.781799	0.760417	0.791855	0.684236	0.778822	0.866499	0.631579	0.748148	0.627273	0.4	0.596154
Echdc1:ENSMUST00000020034.5	0.737628	0.776672	0.792846	0.726443	0.737368	0.783227	0.758441	0.834679	0.89219	0.868422	0.944738	0.863803	0.848483
Evi5:ENSMUST00000112642.7	0.848485	0.772894	0.805875	0.810256	0.815385	0.787629	0.844132	0.904509	0.898718	0.899329	0.9	0.859649	0.876672
Ednrb:ENSMUST00000022718.10	0.730546	0.857506	0.941154	0.628751	1	0.812661	0.710035	0.92048	0.823125	0.864825	0.810835	0.668682	0.39257
Tafa5:ENSMUST00000068088.7	0.373041	0.390939	0.395064	0.354962	0.355769	0.395376	0.34995	0.367834	0.351549	0.231266	0.374531	0.470588	0.385827
Ddx56:ENSMUST00000004507.10	0.169355	0.124138	0.0866218	0.0765766	0.0473373	0.0711582	0.0831482	0.184211	0.0978934	0.0834225	0.0924574	0.0415512	0.0709988
Wdr73:ENSMUST00000026816.14	0.372093	0.310811	0.325936	0.327703	0.264706	0.270038	0.303455	0.261194	0.349085	0.320099	0.320796	0.254717	0.28
Pip4k2a:ENSMUST00000006912.11	0.931818	0.885559	0.813983	0.772727	0.866667	0.82194	0.793251	0.882353	0.85679	0.754098	0.911575	0.694575	0.808786
Ppp2r3c:ENSMUST00000021410.9	0.0707071	0.168889	0.1278	0.150515	0.107345	0.0832536	0.121226	0.198312	0.220441	0.274074	0.106613	0.137056	0.13745
Rab3c:ENSMUST00000167824.2	0.572496	0.714998	0.773746	0.446947	0.66099	0.655172	0.709466	0.686235	0.575066	0.573338	0.560066	0.573205	0.579484
Dnaja4:ENSMUST00000070070.7	0.783333	0.630631	0.586461	0.651741	0.494048	0.523573	0.65844	0.776382	0.749362	0.714214	0.730318	0.657534	0.605617
Anapc1:ENSMUST00000014499.9	0.647864	0.691327	0.620432	0.622953	0.667969	0.648435	0.588228	0.660998	0.458662	0.525231	0.422734	0.243333	0.316352
Nucks1:ENSMUST00000062264.7	0.776747	0.754595	0.778664	0.737907	0.735677	0.753432	0.827716	0.652854	0.844537	0.808992	0.794716	0.829796	0.809178
Strn3:ENSMUST00000013130.14	0.363095	0.379794	0.339077	0.408284	0.321127	0.351307	0.370602	0.46356	0.300885	0.487941	0.486784	0.466192	0.432614
Mtus1:ENSMUST00000059115.12	0.78709	0.725686	0.747453	0.802271	0.689997	0.723317	0.731169	0.735312	0.593887	0.700225	0.643882	0.542353	0.615407
Alkbh5:ENSMUST00000044250.3	0.344923	0.325084	0.393589	0.273189	0.192083	0.261878	0.274802	0.362742	0.466035	0.4351	0.315883	0.281938	0.369863
Rfxap:ENSMUST00000044373.5	0.436735	0.432566	0.493962	0.469914	0.441718	0.406995	0.44027	0.322476	0.47103	0.315021	0.271628	0.289216	0.237817
Prkcz:ENSMUST00000103178.10	0.284483	0.26186	0.272868	0.275168	0.20026	0.251958	0.254748	0.277228	0.240566	0.100946	0.123379	0.253623	0.1571
Adcy1:ENSMUST00000020706.4	0.932959	0.860567	0.90461	0.900624	0.90996	0.910807	0.914465	0.907237	0.894834	0.854905	0.930325	0.876831	0.881907
Znhit6:ENSMUST00000098534.8	0.302076	0.196899	0.297682	0.0615502	0.153481	0.180961	0.252383	0.1771	0.0601131	0.0667638	0.0777593	0.0612279	0.0542167
Smarca1:ENSMUST00000088973.10	0.624751	0.648435	0.657551	0.69837	0.592576	0.664725	0.689174	0.733691	0.685085	0.765192	0.691176	0.638889	0.68002
Homer2:ENSMUST00000098326.2	0.0605124	0.0712297	0.0825112	0.0530183	0.0414891	0.105591	0.0573429	0.175761	0.0820697	0.0966597	0.13618	0.0924574	0.139261
Mrs2:ENSMUST00000021772.3	0.830823	0.77901	0.824147	0.782641	0.551146	0.817956	0.792986	0.894764	0.62235	0.642078	0.770296	0.490901	0.660532
Map7d2:ENSMUST00000112471.8	0.571429	0.546763	0.558544	0.62069	0.483146	0.546856	0.588327	0.737113	0.554839	0.692893	0.576336	0.529412	0.649123
Ripor1:ENSMUST00000043531.9	0.0551724	0.0873181	0.0482251	0.0697674	0.121693	0.0745278	0.0423566	0.166667	0.0835476	0.16289	0.0807292	0.0405405	0.191421
Slc35b2:ENSMUST00000223987.1	0.362637	0.256198	0.25	0.191057	0.075	0.2	0.186047	0.274611	0.124066	0.167269	0.142469	0.1373	0.163772
Gid4:ENSMUST00000070681.6	0.856288	0.906066	0.891626	0.788333	0.845928	0.873851	0.864775	0.792123	0.805141	0.802815	0.702881	0.744931	0.716558
Hspa4l:ENSMUST00000204702.2	0.58332	0.522712	0.599327	0.540046	0.573452	0.592578	0.580289	0.520747	0.454827	0.503472	0.492352	0.444677	0.500447
Foxk2:ENSMUST00000106113.1	0.615294	0.563459	0.588796	0.604676	0.546491	0.597483	0.5918	0.585914	0.668743	0.695382	0.506094	0.622316	0.663879
Acap3:ENSMUST00000079031.5	0.908696	0.784574	0.827493	0.931217	0.839506	0.845583	0.864991	0.92126	0.886507	0.736769	0.719199	0.686567	0.560408
Rbms3:ENSMUST00000111773.9	0.249645	0.378587	0.369509	0.31141	0.357816	0.364982	0.343713	0.366572	0.305884	0.408908	0.430488	0.287681	0.37254
Kdm4b:ENSMUST00000025036.10	0.66142	0.560311	0.560061	0.550453	0.582082	0.574789	0.550264	0.598807	0.594415	0.582058	0.557043	0.589402	0.587503
Bcl2l13:ENSMUST00000009256.3	0.391304	0.435252	0.422925	0.272401	0.357143	0.470909	0.382088	0.693023	0.421436	0.386391	0.414835	0.32	0.441696
Stim1:ENSMUST00000211457.1	0.573529	0.670635	0.669397	0.643312	0.685259	0.66395	0.674493	0.755102	0.614925	0.682327	0.624095	0.6	0.648115
Dtd2:ENSMUST00000021339.7	0.49261	0.47748	0.469177	0.477827	0.529301	0.494058	0.450644	0.570012	0.483841	0.502785	0.508712	0.480228	0.48766
Zranb1:ENSMUST00000106157.7	0.220178	0.230529	0.268978	0.286133	0.214665	0.259249	0.254847	0.268526	0.19862	0.234893	0.24816	0.202819	0.198602
Yipf6:ENSMUST00000054697.6	0.863765	0.862583	0.874798	0.718845	0.637569	0.832486	0.848067	0.841897	0.794926	0.667148	0.638954	0.50574	0.54391
Adamts5:ENSMUST00000023611.6	0.444768	0.173178	0.14093	0.126135	0.117264	0.1254	0.0861734	0.168345	0.131016	0.167348	0.132394	0.24696	0.130252
Scn7a:ENSMUST00000042792.6	NA	0.735497	0.635828	NA	0.35756	0.411932	0.673091	0.690126	0.759779	0.703002	1	1	0.559052
Zfp955a:ENSMUST00000008830.9	0.0615385	0.040201	0.0404551	0.075	0.0606061	0.0471698	0.0700456	0.140845	0.0581395	0.0714286	0.0502646	0.133333	0.0755814
Mau2:ENSMUST00000168013.2	0.434423	0.35396	0.389747	0.344482	0.315245	0.369563	0.369861	0.320548	0.374275	0.248953	0.33223	0.188883	0.367178
Aasdhppt:ENSMUST00000051589.8	0.260806	0.272583	0.288941	0.122034	0.13774	0.231782	0.199561	0.162774	0.131887	0.074605	0.0869	0.0451704	0.0587181
Eif1a:ENSMUST00000078079.10	0.31207	0.348026	0.325016	0.395108	0.296709	0.303029	0.342291	0.405676	0.413738	0.370748	0.389166	0.349744	0.34583
Tprkb:ENSMUST00000113753.7	0.376682	0.437095	0.479512	0.339144	0.395437	0.417526	0.423668	0.535124	0.468989	0.545276	0.42795	0.294521	0.421096
Ctnnd2:ENSMUST00000081728.6	0.403322	0.408039	0.379867	0.471452	0.398369	0.354912	0.465467	0.312701	0.479622	0.48046	0.336095	0.424299	0.42788
Erp44:ENSMUST00000030028.4	0.448651	0.271207	0.248011	0.218852	0.214807	0.264808	0.251739	0.261055	0.142701	0.115194	0.179404	0.0448152	0.105729
Phtf2:ENSMUST00000118174.7	0.950306	0.918534	0.928325	0.912405	0.906269	0.919467	0.928851	0.967391	0.933009	0.932191	0.866152	0.82082	0.903782
Gatad1:ENSMUST00000007559.14	0.603748	0.615136	0.656585	0.577126	0.565478	0.580216	0.589181	0.586096	0.636848	0.547668	0.55721	0.478518	0.48055
Cyp51:ENSMUST00000001507.4	0.220163	0.276366	0.253266	0.221918	0.180943	0.212566	0.237512	0.243107	0.205181	0.201009	0.21251	0.18782	0.181382
Tnks2:ENSMUST00000025729.11	0.942176	0.946653	0.954109	0.90812	0.968242	0.94588	0.982898	0.891197	0.792239	0.793067	0.756205	0.697176	0.758893
Gdap1l1:ENSMUST00000109420.9	0.31792	0.322779	0.32361	0.237817	0.264156	0.306473	0.330314	0.443471	0.271828	0.199893	0.133426	0.254183	0.164131
Nek7:ENSMUST00000186017.6	0.410783	0.488161	0.473755	0.426799	0.430521	0.464678	0.457362	0.4967	0.454831	0.440486	0.452448	0.379071	0.445871
Mmaa:ENSMUST00000048718.3	0.19198	0.128441	0.128613	0.106805	0.0426967	0.100208	0.0877018	0.139804	0.0480373	0.0593688	0.0204395	0.0198974	0.0329818
Nat8l:ENSMUST00000056355.8	0.589661	0.546158	0.53338	0.60089	0.540793	0.585206	0.557265	0.502326	0.43303	0.606667	0.623656	0.649289	0.645614
H2-T22:ENSMUST00000058801.14	0.1	0.271845	0.225806	0.123288	0.107143	0.194774	0.21519	0.167598	0.125813	0.0438596	0.0366972	0.0170213	0.0307102
Stx18:ENSMUST00000114126.8	0.125	0.0686275	0.0691943	0.160121	0.0463918	0.0989305	0.0720842	0.170103	0.127476	0.155536	0.079573	0.13783	0.111418
Vcpkmt:ENSMUST00000058639.10	0.383562	0.406915	0.404558	0.244275	0.280702	0.302993	0.302709	0.341232	0.230769	0.210174	0.247934	0.201058	0.228605
Mest:ENSMUST00000124665.2	0.887439	0.764496	0.813816	0.883142	0.72548	0.743949	0.812544	0.800156	0.860662	0.889268	0.877743	0.789211	0.90638
Grpel2:ENSMUST00000238010.1	0.268312	0.247334	0.267746	0.285807	0.186421	0.240863	0.280408	0.291892	0.356413	0.276553	0.341494	0.228214	0.272757
Fosl2:ENSMUST00000031017.10	1	0.923042	0.939215	0.764387	0.863702	0.901074	0.882884	0.953288	0.837549	0.889415	0.911883	0.876321	0.897627
Wdr18:ENSMUST00000045247.8	0.196248	0.135454	0.20184	0.128515	0.126993	0.133624	0.116337	0.216942	0.137768	0.150794	0.152689	0.0881542	0.108955
Adgrl3:ENSMUST00000120128.7	0.362192	0.302084	0.263802	0.296728	0.207655	0.26005	0.345357	0.221487	0.180529	0.241607	0.0944233	0.311945	0.280467
Cpne3:ENSMUST00000029885.4	0.259259	0.405405	0.414634	0.370861	0.230769	0.375	0.402262	0.644342	0.484138	0.659882	0.473422	0.543767	0.61042
Slc25a25:ENSMUST00000052119.13	0.123656	0.0893372	0.0725133	0.118971	0.11399	0.10197	0.112211	0.251232	0.157456	0.44688	0.119829	0.356667	0.327586
Ryk:ENSMUST00000035142.7	0.241071	0.192878	0.20384	0.47505	0.164474	0.27027	0.246363	0.361925	0.272657	0.465605	0.477801	0.412844	0.394749
Tram1:ENSMUST00000027068.10	0.868943	0.891715	0.905777	0.779101	0.863828	0.86449	0.854637	0.869838	0.830011	0.878992	0.500465	0.875916	0.880953
Ttll7:ENSMUST00000037942.10	0.823204	0.805618	0.785499	0.794776	0.847134	0.836773	0.869456	0.877551	0.802691	0.836364	0.770927	0.794872	0.808554
Cdc42bpa:ENSMUST00000111117.7	0.82732	0.827296	0.824409	0.815217	0.783784	0.791825	0.747854	0.844262	0.681229	0.726506	0.704657	0.897059	0.672203
Tyw1:ENSMUST00000040213.12	0.153846	0.288136	0.224181	0.150289	0.195122	0.211823	0.196564	0.244186	0.157119	0.142857	0.172464	0.097561	0.12619
Naa50:ENSMUST00000161326.7	0.564688	0.555516	0.596367	0.472867	0.434685	0.537214	0.499646	0.555167	0.560606	0.511166	0.449173	0.436493	0.475517
Shc2:ENSMUST00000020564.6	0.791918	0.74863	0.769329	0.690029	0.63623	0.737975	0.715347	0.795022	0.618734	0.637192	0.567177	0.57887	0.686713
Slc7a1:ENSMUST00000048116.14	0.4	0.481268	0.429799	0.490446	0.566265	0.456556	0.435746	0.611973	0.307692	0.574257	0.502703	0.4375	0.500181
Ccdc127:ENSMUST00000022063.13	0.250292	0.256617	0.282217	0.198632	0.17682	0.259676	0.27451	0.258404	0.198047	0.173438	0.179212	0.0925738	0.14009
Tmem218:ENSMUST00000034632.9	0.104712	0.083045	0.101926	0.0690184	0.0871795	0.0934579	0.100196	0.159292	0.127526	0.0878788	0.0441176	0.0585586	0.0504587
Stx7:ENSMUST00000220041.1	0.770833	0.732345	0.778749	0.72644	0.757852	0.763877	0.775696	0.680062	0.722222	0.670915	0.709585	0.662356	0.578824
Mfap1a:ENSMUST00000089926.5	0.351488	0.396006	0.394735	0.291684	0.257592	0.301785	0.354634	0.343484	0.338167	0.309397	0.338109	0.324695	0.344649
Pak2:ENSMUST00000023467.8	0.452948	0.416611	0.43008	0.437037	0.448756	0.477318	0.46853	0.475836	0.453859	0.512503	0.36437	0.472336	0.495024
4930453N24Rik:ENSMUST00000076991.6	0.0625076	0.241218	0.264799	0.109393	0.0515626	0.218675	0.188591	0.157118	0.12864	0.0608611	0.175355	0.0759748	0.166251
Crebzf:ENSMUST00000061767.4	0.736731	0.697002	0.704973	0.70872	0.688518	0.695482	0.68561	0.685675	0.71759	0.74917	0.754389	0.714534	0.714024
Gnai2:ENSMUST00000055704.11	0.646739	0.623521	0.687396	0.657697	0.555663	0.60171	0.623837	0.599588	0.639822	0.535698	0.670069	0.583135	0.604685
Plxna2:ENSMUST00000027952.11	0.533775	0.621957	0.5942	0.658427	0.562511	0.561706	0.570837	0.627286	0.521351	0.619804	0.522686	0.416259	0.52252
Gorasp1:ENSMUST00000035099.8	0.186242	0.224263	0.18356	0.126373	0.178994	0.224856	0.165552	0.233838	0.165305	0.088214	0.120757	0.0696227	0.122798
Etfrf1:ENSMUST00000039729.4	0.522684	0.476599	0.495214	0.471186	0.497635	0.483048	0.456774	0.490769	0.526617	0.509107	0.521081	0.438408	0.469474
Ube2j1:ENSMUST00000124992.7	0.803175	0.914223	0.908799	0.550388	0.779221	0.877686	0.863272	0.856753	0.737445	0.552699	0.581978	0.548845	0.452592
Dck:ENSMUST00000031311.9	0.983333	0.944134	0.96625	0.913313	0.82	0.954674	0.955729	0.944134	0.95283	0.958101	0.93994	0.87619	0.868421
Ehmt1:ENSMUST00000147147.7	0.137193	0.164111	0.164533	0.169907	0.186047	0.136177	0.141923	0.190297	0.15636	0.195391	0.151593	0.165251	0.191314
Magi1:ENSMUST00000089317.11	0.419826	0.317442	0.339428	0.240811	0.304692	0.344535	0.348214	0.374661	0.283767	0.410651	0.234462	0.299797	0.262009
M6pr:ENSMUST00000007602.14	0.687861	0.71358	0.759796	0.685	0.709184	0.72824	0.728098	0.8256	0.867985	0.876623	0.711213	0.862107	0.822649
Dmac2l:ENSMUST00000220916.1	0.814286	0.741296	0.822773	0.709493	0.847467	0.793467	0.832108	0.860959	0.770045	0.758616	0.71281	0.581975	0.610433
Ppp1r3f:ENSMUST00000150787.7	0.0646912	0.0748904	0.0762167	0.0814842	0.0367662	0.0598945	0.0920368	0.0437922	0.107013	0.0934986	0.0788924	0.0632576	0.0890393
Lrrfip2:ENSMUST00000035078.12	0.349242	0.22415	0.250693	0.179736	0.168304	0.222498	0.248627	0.268711	0.226067	0.15319	0.333754	0.150565	0.107177
Ube3c:ENSMUST00000049453.8	0.64432	0.573386	0.601294	0.684534	0.463828	0.580789	0.609357	0.550254	0.533106	0.607088	0.423509	0.647128	0.520844
Rbms1:ENSMUST00000028347.12	0.475463	0.456443	0.489164	0.413495	0.355545	0.414908	0.429824	0.469325	0.444694	0.422226	0.437963	0.333894	0.384143
Pank2:ENSMUST00000150843.7	0.512987	0.387683	0.374388	0.345801	0.255278	0.334645	0.313523	0.362405	0.47912	0.3279	0.386913	0.354745	0.386462
Tpd52l2:ENSMUST00000149163.7	0.279175	0.28035	0.266659	0.23751	0.201587	0.25513	0.277903	0.407524	0.32627	0.364227	0.326186	0.294457	0.319256
Cacna1b:ENSMUST00000070864.13	0.917745	0.861226	0.869755	0.887082	0.897768	0.861074	0.86624	0.900114	0.790453	0.829969	0.611474	0.821363	0.785681
Mlx:ENSMUST00000107302.7	0.323077	0.32345	0.359918	0.320158	0.277154	0.274209	0.274485	0.396396	0.462687	0.487871	0.305305	0.50495	0.507322
Dnm3:ENSMUST00000086074.11	0.561674	0.550422	0.545591	0.581169	0.540984	0.563282	0.590293	0.677596	0.55615	0.652174	0.396493	0.62069	0.417544
5730480H06Rik:ENSMUST00000196950.4	0.645902	0.638332	0.743052	0.779421	0.768898	0.637807	0.735538	0.8233	0.825894	0.782553	0.764981	0.755759	0.731788
Rad23b:ENSMUST00000030134.8	0.345552	0.334398	0.343296	0.296296	0.319746	0.342592	0.353812	0.335349	0.30003	0.263163	0.249394	0.2298	0.256127
Xpot:ENSMUST00000039810.7	0.40625	0.643182	0.565302	0.445652	0.509804	0.587444	0.59995	0.632479	0.465403	0.464191	0.647713	0.369099	0.489164
Smim14:ENSMUST00000139122.7	0.125577	0.142498	0.159584	0.0759545	0.0518483	0.117198	0.0878718	0.153333	0.131868	0.096588	0.0337292	0.0286686	0.047649
Dnajb14:ENSMUST00000090178.9	0.786611	0.867131	0.888321	0.772706	0.784948	0.777402	0.85222	0.791891	0.764584	0.631265	0.824777	0.556386	0.631939
Tigar:ENSMUST00000039913.8	0.786987	0.886615	0.829727	0.497326	0.699659	0.753269	0.667592	0.942592	0.695371	0.707602	0.746882	0.336675	0.573742
Eif5:ENSMUST00000166123.8	0.630368	0.686852	0.707727	0.643013	0.598019	0.655275	0.610519	0.670612	0.636388	0.645712	0.60274	0.644873	0.578549
Maco1:ENSMUST00000030628.14	0.630542	0.533166	0.535095	0.556797	0.457944	0.565553	0.457	0.685315	0.669958	0.733483	0.587309	0.672727	0.672009
Elavl2:ENSMUST00000107110.7	0.622074	0.663801	0.675732	0.624094	0.616195	0.640072	0.665403	0.708635	0.696486	0.645861	0.666716	0.546986	0.59826
Hnrnpul1:ENSMUST00000206832.1	0.565526	0.524486	0.614585	0.591837	0.567168	0.580183	0.533002	0.605067	0.625016	0.641915	0.619493	0.412796	0.6536
Smug1:ENSMUST00000229377.1	0.96875	0.941176	0.962145	0.956989	1	0.963964	0.954875	0.973684	0.960145	0.964286	0.868486	0.974359	0.977169
Ctnnbip1:ENSMUST00000030839.12	0.184435	0.225131	0.220153	0.160017	0.14554	0.173403	0.205791	0.225848	0.267068	0.246838	0.193209	0.167495	0.184583
Crebrf:ENSMUST00000062519.13	0.914286	0.836735	0.845222	0.821429	0.802632	0.863685	0.666222	0.876494	0.740659	0.744444	0.800551	0.585586	0.803097
Mkln1:ENSMUST00000026699.14	0.588151	0.549978	0.595816	0.416026	0.51955	0.551413	0.530959	0.428361	0.420899	0.299206	0.298479	0.164069	0.314805
Fktn:ENSMUST00000128667.7	0.297242	0.355954	0.377283	0.324916	0.263682	0.301274	0.345868	0.415367	0.379467	0.440256	0.370275	0.236007	0.313231
Ing2:ENSMUST00000080353.2	0.330055	0.218525	0.24978	0.153354	0.201415	0.229875	0.18182	0.292828	0.149787	0.144944	0.100807	0.0544053	0.124181
Arpc5l:ENSMUST00000112862.6	0.171615	0.13789	0.124473	0.195756	0.150292	0.128579	0.145723	0.174806	0.146407	0.190238	0.12865	0.213131	0.1976
Arid1a:ENSMUST00000145664.8	0.389447	0.411866	0.45447	0.453925	0.394366	0.353751	0.395711	0.586667	0.343583	0.512852	0.457542	0.486279	0.441029
Dapk1:ENSMUST00000077453.12	0.714286	0.597906	0.67439	0.627859	0.540541	0.59381	0.58888	0.72956	0.649331	0.659341	0.592593	0.57377	0.664948
Zfp968:ENSMUST00000109048.2	0.799299	0.726686	0.716425	0.780343	0.77566	0.756459	0.788709	0.694771	0.781456	0.717127	0.808463	0.718587	0.726319
Plaa:ENSMUST00000107107.8	0.304448	0.392781	0.354041	0.190498	0.210177	0.367688	0.313225	0.285872	0.342847	0.213752	0.304282	0.0785904	0.187494
Washc1:ENSMUST00000072383.13	0.22043	0.256293	0.330171	0.229075	0.265537	0.260814	0.222283	0.287234	0.135774	0.176589	0.112778	0.113903	0.147144
Gtf2f2:ENSMUST00000088922.4	0.627734	0.790923	0.844255	0.778707	0.816435	0.811296	0.792667	0.818226	0.685501	0.678871	0.70874	0.566007	0.611454
Ccng1:ENSMUST00000020576.7	0.925	0.898773	0.915038	0.887574	0.888889	0.829114	0.889434	0.916256	0.899065	0.874191	0.893801	0.853556	0.787919
Scrn3:ENSMUST00000090811.10	0.875916	0.897003	0.926123	0.653912	0.821468	0.875546	0.890839	0.943382	0.83294	0.671292	0.713438	0.612347	0.582627
Sav1:ENSMUST00000021467.7	0.97561	0.863636	0.880769	1	0.846154	0.864929	0.881255	0.96	0.956731	0.960984	0.870849	0.936937	0.939471
Ttbk1:ENSMUST00000047034.8	0.474776	0.454727	0.427949	0.519453	0.460632	0.446337	0.404442	0.504433	0.386457	0.551281	0.45509	0.306742	0.529717
Far1:ENSMUST00000033018.14	0.739568	0.658415	0.686776	0.659716	0.6353	0.671395	0.683609	0.729156	0.702139	0.678839	0.731493	0.605619	0.739063
Dcaf7:ENSMUST00000058438.8	0.980132	0.977816	0.988727	0.956236	0.986702	0.969797	0.996334	0.946591	0.943704	0.970993	0.608905	0.94702	0.892132
Mmut:ENSMUST00000169611.3	0.53801	0.357702	0.395412	0.340619	0.359352	0.338148	0.355637	0.469382	0.367168	0.505177	0.41117	0.353184	0.395256
Hcn3:ENSMUST00000029686.3	0.114429	0.0982737	0.0975877	0.138172	0.230138	0.122661	0.148143	0.206232	0.219021	0.290147	0.229052	0.414807	0.332403
Iffo1:ENSMUST00000119527.7	0.895349	0.820513	0.87364	0.938272	0.84	0.854069	0.815325	0.909449	0.947683	0.967851	0.974023	0.977011	0.956923
Luc7l2:ENSMUST00000161538.7	0.75732	0.742422	0.736425	0.681616	0.721609	0.740824	0.743324	0.709271	0.610142	0.575448	0.608991	0.53991	0.543856
Mtpn:ENSMUST00000031866.8	0.858348	0.871995	0.888291	0.787501	0.854196	0.822189	0.883675	0.869191	0.766032	0.746805	0.487403	0.696621	0.640999
Pcdh9:ENSMUST00000195826.5	0.774286	0.747855	0.713612	0.757917	0.63416	0.710258	0.712896	0.761221	0.735769	0.782284	0.779629	0.536599	0.683747
Pck2:ENSMUST00000226519.1	0.254146	0.0674621	0.12076	0.0671256	0.0573188	0.112408	0.114928	0.0971178	0.108046	0.0936534	0.264032	0.0418751	0.0780659
Litaf:ENSMUST00000023143.13	0.66896	0.652064	0.395069	0.523042	0.381101	0.582314	0.47196	0.608519	0.574919	0.594234	0.398441	0.598165	0.590684
Anapc15:ENSMUST00000144207.8	0.152941	0.22093	0.21936	0.0714286	0.117647	0.165848	0.1185	0.246269	0.111594	0.0837004	0.065285	0.0976253	0.0900563
Stag2:ENSMUST00000115073.8	0.913793	0.833333	0.866788	0.90184	0.918919	0.905405	0.881379	0.918149	0.935351	0.91906	0.918207	0.902299	0.882353
Mgat2:ENSMUST00000060579.9	0.768595	0.74147	0.779125	0.840683	0.709425	0.706074	0.760631	0.746266	0.79263	0.803243	0.791533	0.820721	0.761946
Fam149a:ENSMUST00000093526.12	0.369206	0.308934	0.307981	0.167747	0.338654	0.247952	0.341725	0.267061	0.28735	0.214793	0.0784139	0.143574	0.167063
Mkrn2:ENSMUST00000000449.8	0.194712	0.156014	0.159416	0.165452	0.167466	0.162688	0.158987	0.218722	0.234193	0.223789	0.208487	0.180963	0.169505
Hif1a:ENSMUST00000110461.7	0.40076	0.299051	0.294361	0.23995	0.231953	0.304725	0.300661	0.287448	0.228585	0.256306	0.203423	0.193888	0.213483
Dnajc14:ENSMUST00000026410.1	0.880952	0.836105	0.86755	0.803204	0.8	0.814064	0.828008	0.848404	0.807638	0.823151	0.845319	0.781038	0.746667
Ptk2:ENSMUST00000226988.2	0.836248	0.822168	0.824363	0.841219	0.832932	0.839776	0.834305	0.831534	0.810824	0.807841	0.819825	0.780218	0.787972
Gtpbp4:ENSMUST00000222098.1	0.0895522	0.0357143	0.0719152	0.0625	0.0472441	0.0508021	0.0789546	0.139535	0.0556553	0.148188	0.0747075	0.0780488	0.0564516
Sec62:ENSMUST00000029256.8	0.121603	0.108234	0.130106	0.0775935	0.0796322	0.11727	0.0766169	0.0857181	0.0614197	0.0456768	0.0619727	0.044689	0.0443473
Paip2:ENSMUST00000235476.1	0.769547	0.710165	0.78265	0.722007	0.741713	0.773705	0.790826	0.8103	0.740066	0.723271	0.612169	0.675536	0.671661
Cpne4:ENSMUST00000057742.14	0.5	0.859944	0.840893	0.857143	0.708333	0.858682	0.885676	0.893039	0.843137	0.854167	0.75	0.2	0.846154
Arcn1:ENSMUST00000034607.9	0.243655	0.275061	0.276697	0.154822	0.144279	0.21396	0.189176	0.282398	0.249476	0.213592	0.155264	0.146835	0.17823
Dcaf8:ENSMUST00000074144.10	0.674923	0.64461	0.658856	0.48062	0.565934	0.661162	0.61452	0.589286	0.570547	0.459172	0.508332	0.418511	0.44564
Rbm7:ENSMUST00000170000.3	0.80597	0.79198	0.789381	0.887763	0.836364	0.791301	0.821194	0.873662	0.919927	0.92412	0.89734	0.938805	0.917289
Yipf5:ENSMUST00000025364.5	0.100507	0.123197	0.16009	0.0735222	0.114909	0.126254	0.0944557	0.128544	0.121708	0.0970046	0.102143	0.0656859	0.110302
Sdhaf2:ENSMUST00000237827.1	0.442857	0.43131	0.473998	0.432624	0.359873	0.417846	0.427394	0.473498	0.547855	0.494182	0.46533	0.469741	0.466975
Eipr1:ENSMUST00000221877.1	0.0806452	0.146881	0.146018	0.0474138	0.0918919	0.120943	0.102154	0.135266	0.0998415	0.0209524	0.0207834	0.010929	0.0115702
Usp7:ENSMUST00000160405.7	0.258518	0.219023	0.218838	0.223692	0.198838	0.217154	0.194454	0.276045	0.231586	0.223107	0.215073	0.23491	0.233626
Mycbp:ENSMUST00000030400.13	0.148434	0.255796	0.275883	0.215455	0.224804	0.191969	0.201243	0.384135	0.25754	0.289764	0.270197	0.232493	0.160091
Armh4:ENSMUST00000036972.13	0.313548	0.342289	0.391707	0.347487	0.282629	0.312527	0.335326	0.324336	0.243054	0.224824	0.221564	0.129525	0.167275
Btbd7:ENSMUST00000223554.1	0.85171	0.747729	0.699379	0.776982	0.624531	0.696135	0.727971	0.717085	0.815506	0.765139	0.728747	0.745796	0.852523
Pum2:ENSMUST00000178015.7	0.533383	0.516444	0.482981	0.459504	0.385092	0.437292	0.488786	0.585492	0.492536	0.530084	0.523104	0.452694	0.513411
Pja1:ENSMUST00000113792.1	0.543578	0.653607	0.630443	0.597539	0.591179	0.612793	0.575863	0.573743	0.577942	0.542862	0.509239	0.538708	0.535577
Pdgfa:ENSMUST00000046901.13	0.174405	0.247401	0.276574	0.189391	0.261403	0.181026	0.215141	0.324306	0.213559	0.347171	0.272872	0.233538	0.274607
Pum3:ENSMUST00000076219.5	0.308511	0.233051	0.238965	0.245	0.217391	0.186788	0.271451	0.386364	0.215774	0.265556	0.253509	0.0711111	0.144975
Acbd3:ENSMUST00000027780.5	0.419921	0.438348	0.355319	0.420122	0.43757	0.415225	0.256804	0.508925	0.344275	0.304713	0.389509	0.241015	0.343686
Ank3:ENSMUST00000182884.7	0.25048	0.227289	0.240109	0.243582	0.25927	0.221021	0.242984	0.316999	0.238674	0.297469	0.214221	0.201306	0.229076
Slc25a10:ENSMUST00000026899.3	0.40297	0.434203	0.41264	0.389734	0.27787	0.385462	0.373964	0.391876	0.377774	0.360988	0.315478	0.323943	0.348361
Eif2ak2:ENSMUST00000024884.4	0.733574	0.785714	0.709714	0.577716	0.549356	0.709884	0.687982	0.753595	0.650923	0.607626	0.604535	0.621114	0.653633
Cdc42:ENSMUST00000030417.9	0.513877	0.479651	0.549894	0.468508	0.531852	0.501988	0.59835	0.542141	0.492163	0.448505	0.312034	0.451613	0.433673
Strbp:ENSMUST00000028279.9	0.541581	0.413242	0.518308	0.481629	0.492423	0.52538	0.509001	0.363925	0.448304	0.366387	0.439504	0.420951	0.381989
Pcnp:ENSMUST00000114444.8	0.776362	0.736858	0.787753	0.676447	0.772992	0.738408	0.731858	0.793669	0.663846	0.762114	0.714898	0.633422	0.647625
Adss:ENSMUST00000016105.8	0.368698	0.82365	0.850535	0.855167	0.879507	0.845053	0.826875	0.903892	0.829881	0.879947	0.847496	0.85314	0.807323
Pgp:ENSMUST00000053024.7	0.18306	0.150792	0.212426	0.155025	0.0942199	0.170604	0.162924	0.171803	0.20432	0.182646	0.18081	0.178961	0.173085
Arhgef9:ENSMUST00000181987.7	0.886079	0.913772	0.915764	0.812543	0.906795	0.891694	0.875463	0.892313	0.73932	0.682192	0.56414	0.747792	0.664366
Eif4g3:ENSMUST00000084215.11	0.310252	0.255391	0.254232	0.243077	0.244152	0.223239	0.25765	0.404781	0.153367	0.314538	0.308582	0.247878	0.266524
Zfp655:ENSMUST00000196069.4	0.163265	0.284314	0.181159	0.170213	0.137255	0.142029	0.227387	0.202381	0.227092	0.175159	0.105359	0.107692	0.107817
1700037C18Rik:ENSMUST00000115859.7	0.217391	0.105769	0.0801688	0.186667	0.102041	0.102975	0.0816653	0.114943	0.0911392	0.168865	0.0732673	0.0927835	0.101942
Fam204a:ENSMUST00000065286.1	0.549414	0.516313	0.493502	0.435729	0.455242	0.489133	0.470878	0.467702	0.456323	0.468406	0.428464	0.432535	0.429546
Anp32a:ENSMUST00000085519.12	0.302464	0.377623	0.414022	0.311195	0.285862	0.350034	0.339982	0.339258	0.30148	0.24078	0.351194	0.181147	0.182829
Ddx3y:ENSMUST00000091190.11	0.5	0.593202	0.603481	0.646471	0.613698	0.601435	0.630548	0.68282	0.577644	0.683435	0.677508	0.592995	0.668604
Snx6:ENSMUST00000005798.8	0.125749	0.198853	0.190383	0.11713	0.143646	0.234687	0.202628	0.28084	0.145374	0.132093	0.0968107	0.130709	0.146318
Wdr26:ENSMUST00000162819.8	0.300261	0.372307	0.399154	0.411856	0.344784	0.355323	0.394903	0.378931	0.335454	0.485775	0.293646	0.343893	0.394203
Spock1:ENSMUST00000185502.6	0.776657	0.758099	0.793095	0.822785	0.694849	0.746075	0.782096	0.838428	0.617021	0.606061	0.513569	0.482759	0.641509
Zfp971:ENSMUST00000108926.2	0.353745	0.168547	0.197511	0.202602	0.336747	0.246648	0.255375	0.205414	0.244633	0.243513	0.38467	0.13099	0.150991
Rcor3:ENSMUST00000110849.9	0.114671	0.153958	0.200668	0.136958	0.106467	0.179985	0.12727	0.303897	0.248683	0.295573	0.262125	0.073202	0.232183
Sv2c:ENSMUST00000161263.7	0.914372	0.91286	0.929014	0.817119	0.849463	0.912707	0.86047	0.955439	0.778493	0.913791	0.798833	0.752673	0.744555
5031439G07Rik:ENSMUST00000047144.12	0.423077	0.154839	0.130221	0.470817	0.112403	0.186066	0.193748	0.387707	0.191497	0.390841	0.532155	0.363409	0.402367
Vps29:ENSMUST00000155671.7	0.24951	0.222028	0.243944	0.196323	0.191789	0.222953	0.202558	0.274065	0.260936	0.205424	0.247254	0.158595	0.162196
Tuba4a:ENSMUST00000186213.6	0.618997	0.696514	0.704161	0.527273	0.659114	0.631393	0.663578	0.457364	0.269895	0.444444	0.443535	0.337165	0.451505
Cd164:ENSMUST00000019962.14	0.87931	0.917391	0.907202	0.84456	0.822785	0.872109	0.873461	0.980676	0.921115	0.967892	0.874563	0.892199	0.91917
Usp15:ENSMUST00000220377.1	0.375914	0.337879	0.362253	0.291822	0.314332	0.361264	0.289148	0.268364	0.188166	0.107619	0.171092	0.112692	0.163593
Map3k3:ENSMUST00000002044.9	0.525356	0.568091	0.625813	0.52196	0.564778	0.535381	0.511749	0.605396	0.575437	0.541849	0.674396	0.615257	0.702138
Faf1:ENSMUST00000102724.4	0.0952381	0.110465	0.111298	0.0745614	0.0442478	0.11234	0.0514382	0.2	0.0463158	0.0507559	0.0658482	0.0105263	0.04329
Dip2c:ENSMUST00000174552.7	0.882137	0.811238	0.815977	0.827024	0.758595	0.809051	0.800093	0.824681	0.826732	0.8818	0.842616	0.75825	0.794335
Nsg1:ENSMUST00000031009.7	0.715816	0.700776	0.709928	0.675485	0.670402	0.683204	0.683854	0.695662	0.68517	0.676744	0.670082	0.697233	0.645106
Hsdl2:ENSMUST00000030078.11	0.655844	0.597865	0.672337	0.47181	0.694118	0.676042	0.638608	0.71988	0.814334	0.79671	0.768111	0.741935	0.72
Frat2:ENSMUST00000059231.3	0.99187	0.949495	0.976708	0.987039	0.907895	0.977407	0.967043	0.944444	0.936508	0.946254	0.945302	0.916667	0.942857
Kctd20:ENSMUST00000233197.1	0.890411	0.837669	0.844649	0.794078	0.755435	0.828212	0.843638	0.871252	0.876833	0.742295	0.785027	0.708423	0.764406
Fxr1:ENSMUST00000197694.4	0.391514	0.401122	0.352487	0.313116	0.323425	0.338646	0.331966	0.26001	0.358888	0.329315	0.262039	0.250368	0.254081
Dcbld2:ENSMUST00000046663.7	0.635199	0.618104	0.62376	0.608549	0.606867	0.624652	0.604142	0.636866	0.644474	0.629435	0.641062	0.575373	0.60147
Ltv1:ENSMUST00000019950.5	0.0357143	0.0848485	0.10745	0.0515464	0.0649351	0.0962264	0.0823171	0.142857	0.0648379	0.0493601	0.0522162	0.0536398	0.0395387
Metap1:ENSMUST00000029804.12	0.9375	0.938272	0.922491	0.853047	0.870056	0.902148	0.928415	0.940559	0.893491	0.89322	0.885598	0.8125	0.830667
Usp48:ENSMUST00000105840.7	0.756086	0.858019	0.852777	0.840556	0.815012	0.84899	0.855494	0.884588	0.720836	0.772725	0.782478	0.520097	0.694541
Cd2bp2:ENSMUST00000166791.7	0.794065	0.781088	0.816826	0.686163	0.682785	0.753185	0.759985	0.800505	0.708461	0.622074	0.658383	0.5251	0.528095
Mrpl16:ENSMUST00000167199.2	0.195058	0.180354	0.176331	0.113943	0.115852	0.145947	0.128088	0.180387	0.192427	0.172449	0.199629	0.0874246	0.0991231
Mrpl40:ENSMUST00000023391.15	0.539648	0.424107	0.456316	0.49384	0.484979	0.433909	0.455576	0.378251	0.406633	0.406265	0.391399	0.397408	0.438065
Hypk:ENSMUST00000126764.1	0.0579004	0.0906526	0.0830828	0.0593363	0.102962	0.0581292	0.0759157	0.0385105	0.0673278	0.0446645	0.0532946	0.0553722	0.0512165
Ccnt1:ENSMUST00000169707.7	0.694291	0.677846	0.66486	0.639757	0.640789	0.638109	0.584364	0.695684	0.713296	0.709447	0.707153	0.758273	0.72825
Rbm25:ENSMUST00000048155.15	0.471991	0.45781	0.454174	0.41993	0.430965	0.433991	0.425714	0.409988	0.431445	0.387011	0.405745	0.335576	0.388204
Fbxl20:ENSMUST00000103143.9	0.624566	0.66623	0.649665	0.418856	0.555081	0.642867	0.656294	0.641968	0.588209	0.546998	0.537525	0.40469	0.602042
Mosmo:ENSMUST00000060175.7	0.83993	0.849194	0.882846	0.900115	0.825323	0.843014	0.847447	0.791209	0.836456	0.770302	0.833285	0.843475	0.867252
Cct8:ENSMUST00000026704.13	0.231827	0.188984	0.251038	0.109804	0.207574	0.130087	0.192032	0.0484027	0.0724166	0.0374714	0.123184	0.0427509	0.0411653
Pitpnc1:ENSMUST00000103064.9	0.516512	0.624784	0.643661	0.487652	0.548632	0.579272	0.579916	0.547329	0.532526	0.479651	0.55525	0.458679	0.537018
Tbc1d16:ENSMUST00000036113.3	0.859316	0.960159	0.943026	0.810811	0.815789	0.919558	0.900332	0.855615	0.928713	0.741071	0.85675	0.752266	0.851623
Eloc:ENSMUST00000188641.6	0.416681	0.383899	0.424572	0.445766	0.366061	0.480005	0.481926	0.373898	0.323151	0.285102	0.258384	0.294456	0.196112
Tmem80:ENSMUST00000145184.7	0.724138	0.850746	0.841051	0.807018	0.806667	0.784495	0.796383	0.775087	0.800568	0.764188	0.801371	0.835938	0.84447
Lmbrd1:ENSMUST00000095062.9	0.703127	0.708308	0.728327	0.634548	0.625407	0.70681	0.680315	0.429968	0.514915	0.339241	0.60531	0.23385	0.318267
Syne1:ENSMUST00000215295.1	0.797862	0.815149	0.815242	0.751629	0.755777	0.758212	0.762065	0.768701	0.762349	0.731617	0.779779	0.806326	0.775323
Gnl1:ENSMUST00000087200.3	0.549763	0.641574	0.675889	0.466819	0.542522	0.673708	0.599518	0.502404	0.303959	0.212857	0.247059	0.314815	0.248045
Suz12:ENSMUST00000017692.14	0.924649	0.890235	0.876721	0.850047	0.824394	0.858443	0.875134	0.822344	0.848295	0.809833	0.847851	0.894709	0.870635
Sdcbp:ENSMUST00000029912.10	0.092437	0.105143	0.0726425	0.113264	0.0694981	0.0608078	0.116293	0.115862	0.1295	0.0787541	0.0861459	0.071547	0.0837725
Taf1:ENSMUST00000101341.8	0.666667	0.905359	0.833261	0.777778	0.839695	0.825559	0.85254	0.838188	0.820416	0.81922	0.850662	0.727273	0.827329
Septin3:ENSMUST00000239048.1	0.577656	0.623572	0.668877	0.591027	0.588059	0.560843	0.677177	0.483432	0.652937	0.57892	0.617502	0.723023	0.591199
Tmem104:ENSMUST00000100235.8	0.733333	0.935484	0.9	0.846154	0.916667	0.871069	0.841386	0.829545	0.744505	0.572917	0.554386	0.486486	0.69112
Tcaim:ENSMUST00000052740.13	0.826087	0.958678	0.966011	0.883721	0.956522	0.929919	0.934128	0.863636	0.933761	0.774892	0.911733	0.939394	0.837662
Ppp4r3b:ENSMUST00000020755.11	0.353007	0.382985	0.427311	0.408088	0.365726	0.422707	0.403422	0.399565	0.473467	0.437453	0.474348	0.417074	0.517976
Trappc12:ENSMUST00000168129.9	0.824561	0.848018	0.841236	0.734568	0.788889	0.781421	0.764373	0.771654	0.677922	0.733681	0.696576	0.695122	0.732432
Btbd3:ENSMUST00000091556.11	0.90668	0.970948	0.963623	0.934579	0.91358	0.929178	0.940339	0.831325	0.924562	0.799349	0.906216	0.808989	0.873656
Faxc:ENSMUST00000029908.7	0.794444	0.839869	0.814165	0.612698	0.661417	0.827079	0.814164	0.692042	0.603604	0.3	0.452055	0.75	0.565217
Plpp1:ENSMUST00000016144.11	0.957143	0.911422	0.939024	0.941667	0.944615	0.884975	0.894514	0.843943	0.891725	0.858149	0.914146	0.875817	0.884966
Nectin3:ENSMUST00000023334.14	0.220965	0.445584	0.418665	0.349275	0.209497	0.323176	0.327253	0.269437	0.170125	0.17708	0.295249	0.425145	0.0987787
Pabpc1:ENSMUST00000001809.14	0.685673	0.623967	0.646912	0.656623	0.687636	0.622021	0.626723	0.719144	0.607002	0.758043	0.659714	0.64734	0.679755
Mrpl3:ENSMUST00000035177.14	0.0812183	0.150579	0.119974	0.0425056	0.0385965	0.0875837	0.0806109	0.0487805	0.0379507	0.0178295	0.0568138	0.0162602	0.0236842
Cd59b:ENSMUST00000090429.7	0.847222	0.862385	0.864992	0.947826	0.808824	0.904915	0.893035	0.846047	0.824588	0.825467	0.887363	0.888889	0.911152
Gphn:ENSMUST00000052472.5	0.824017	0.766849	0.810771	0.778068	0.75853	0.775206	0.821442	0.740741	0.78845	0.740741	0.82109	0.782609	0.798408
Acadsb:ENSMUST00000015829.14	0.416312	0.386442	0.357791	0.369286	0.339984	0.376318	0.36261	0.397587	0.356274	0.346667	0.352544	0.350862	0.36308
Smn1:ENSMUST00000022147.14	0.710744	0.785211	0.79797	0.747076	0.806452	0.656461	0.724842	0.684	0.770156	0.677083	0.75499	0.718543	0.748276
Cpne8:ENSMUST00000064391.11	0.125	0.242718	0.192118	0.2	0.3	0.207627	0.214674	0.147959	0.240506	0.202381	0.25	0.25	0.221675
Ago3:ENSMUST00000069097.12	0.720076	0.793542	0.726167	0.743578	0.670347	0.739183	0.729344	0.680712	0.746539	0.724327	0.82123	0.765862	0.757137
Ascc1:ENSMUST00000164083.3	0.747126	0.733179	0.781142	0.684418	0.821839	0.657018	0.739703	0.638581	0.705762	0.655738	0.738849	0.700803	0.736499
Pde10a:ENSMUST00000089085.9	0.845215	0.901042	0.921527	0.824943	0.895846	0.918273	0.909206	0.832677	0.796996	0.754961	0.689741	0.682549	0.757288
Gnal:ENSMUST00000025402.14	0.784038	0.810291	0.808232	0.764075	0.737003	0.790569	0.777773	0.719178	0.758278	0.677083	0.69403	0.694915	0.762887
Phlda1:ENSMUST00000164773.1	0.361868	0.38447	0.415802	0.415094	0.348584	0.4058	0.400266	0.258929	0.332031	0.247453	0.336392	0.234273	0.29882
Brinp1:ENSMUST00000030036.5	0.975309	0.962536	0.971491	0.962069	0.938326	0.960673	0.958127	0.88961	0.922594	0.946188	0.94518	0.878049	0.861111
Mpp5:ENSMUST00000082024.6	0.862069	0.755784	0.744346	0.704225	0.726027	0.698517	0.630062	0.70098	0.720119	0.68256	0.748749	0.692913	0.76662
Tmem167:ENSMUST00000161568.7	0.270776	0.179004	0.228797	0.194669	0.147083	0.214918	0.241594	0.164119	0.201951	0.124774	0.145938	0.104779	0.0988674
Tnrc6a:ENSMUST00000094053.6	0.332373	0.288426	0.292124	0.365465	0.298882	0.30467	0.2837	0.337856	0.296658	0.33518	0.3343	0.316147	0.343429
Gpd2:ENSMUST00000169687.7	0.418876	0.524024	0.524713	0.395638	0.440018	0.449454	0.497284	0.51204	0.466055	0.460293	0.466763	0.330748	0.433067
Mfap1b:ENSMUST00000056732.3	0.333721	0.382627	0.393248	0.327456	0.313402	0.343298	0.353737	0.357737	0.374222	0.341183	0.353455	0.354308	0.380055
Jund:ENSMUST00000095267.5	0.977244	0.969921	0.975589	0.97679	0.972051	0.956224	0.966295	0.864087	0.974767	0.888837	0.965242	0.976876	0.972317
Slc5a3:ENSMUST00000113975.2	0.931034	0.88764	0.89832	0.901961	0.823009	0.881204	0.869286	0.824034	0.875843	0.775665	0.948818	0.837209	0.888489
Elavl3:ENSMUST00000003501.8	0.482202	0.546274	0.567779	0.474473	0.481781	0.522593	0.536259	0.490947	0.434027	0.44735	0.54047	0.430575	0.479784
Tceal9:ENSMUST00000048687.10	0.572388	0.488907	0.545344	0.476653	0.604175	0.493844	0.524076	0.495939	0.511822	0.534206	0.516412	0.479029	0.579873
Pisd:ENSMUST00000071829.11	0.767956	0.830793	0.788016	0.842988	0.852941	0.814751	0.836194	0.728477	0.917148	0.82715	0.825716	0.767036	0.822983
Gm20671:ENSMUST00000144673.2	0.767956	0.830793	0.788016	0.842988	0.852941	0.814751	0.836194	0.728477	0.917148	0.82715	0.825716	0.767036	0.822983
Tbc1d24:ENSMUST00000168410.8	0.896198	0.933868	0.920121	0.942991	0.92946	0.932152	0.917292	0.855358	0.907009	0.879981	0.925904	0.937366	0.917181
Cspp1:ENSMUST00000122156.7	0.0212766	0.113514	0.0588235	0.113475	0.104348	0.0740103	0.0850112	0.0365854	0.0219298	0.0460123	0.0162602	0.1	0.043956
Faf2:ENSMUST00000126071.8	0.511162	0.623253	0.660399	0.544196	0.509492	0.575448	0.551485	0.596079	0.638817	0.521989	0.56477	0.440672	0.485809
Mthfd2:ENSMUST00000005810.8	0.555556	0.680723	0.736383	0.693122	0.730159	0.711656	0.722317	0.644128	0.773109	0.680519	0.690547	0.809211	0.676471
Camk4:ENSMUST00000042868.5	0.754245	0.73597	0.750784	0.709898	0.686257	0.69457	0.725386	0.644798	0.718037	0.624243	0.684586	0.704153	0.717642
Qk:ENSMUST00000042296.8	0.4375	0.733607	0.783784	0.698052	0.873563	0.463132	0.578658	0.809302	0.820958	0.849153	0.880981	0.879159	0.885528
Cops8:ENSMUST00000036153.11	0.302041	0.339075	0.353485	0.325754	0.342516	0.352758	0.353151	0.231707	0.286318	0.215509	0.309184	0.270332	0.224986
Hip1:ENSMUST00000060311.11	0.888994	0.766871	0.807118	0.822392	0.723084	0.832789	0.820442	0.795312	0.77588	0.824593	0.821067	0.743858	0.854727
Spred2:ENSMUST00000093299.12	0.748744	0.914729	0.876923	0.807309	0.807018	0.809568	0.826624	0.758364	0.862039	0.71504	0.738562	0.818182	0.869058
Srgap1:ENSMUST00000020322.11	0.836948	0.876265	0.819287	0.878687	0.758195	0.841724	0.710315	0.864098	0.801322	0.848461	0.872957	0.696726	0.778369
Ebf3:ENSMUST00000169486.8	0.866667	0.86631	0.900318	0.95122	0.88759	1	0.787512	0.785559	0.928571	0.787879	0.769859	0.901639	0.96875
Ptges3:ENSMUST00000052798.13	0.639004	0.66859	0.666872	0.553821	0.533482	0.629839	0.601645	0.59681	0.611575	0.548121	0.609635	0.494623	0.557988
Wasf2:ENSMUST00000084241.11	0.818182	0.7	0.931034	0.855072	0.888889	0.863014	0.740741	0.806763	0.921922	0.916315	0.925046	0.892458	0.923323
Rcn1:ENSMUST00000006128.6	0.931034	0.811533	0.750507	0.849624	0.710425	0.705566	0.793488	0.769481	0.84316	0.825118	0.843243	0.840426	0.873534
Gtf2ird1:ENSMUST00000074114.11	0.703795	0.648492	0.706273	0.665854	0.615116	0.636728	0.653059	0.648077	0.706969	0.73444	0.733196	0.715853	0.762148
Ptbp3:ENSMUST00000030076.11	0.759333	0.88262	0.76718	0.71746	0.693716	0.777925	0.750738	0.836201	0.759365	0.785213	0.862389	0.684425	0.796359
Gon7:ENSMUST00000173969.1	0.783245	0.663791	0.694005	0.707087	0.716093	0.647921	0.686075	0.638463	0.658198	0.639209	0.605221	0.64813	0.658875
Dram2:ENSMUST00000067630.12	0.320358	0.316685	0.347893	0.2725	0.388155	0.331613	0.230019	0.266966	0.339955	0.241863	0.321894	0.261529	0.276247
Syt7:ENSMUST00000076968.10	0.190621	0.146185	0.207734	0.185789	0.149157	0.197438	0.163558	0.236437	0.15435	0.183863	0.215298	0.113126	0.200775
Arhgef12:ENSMUST00000165665.8	0.893273	0.911964	0.925109	0.900245	0.879617	0.869481	0.914489	0.794166	0.89887	0.840432	0.917031	0.85644	0.907389
Mrpl36:ENSMUST00000022098.9	0.797753	0.784244	0.823882	0.825677	0.846447	0.838437	0.84465	0.768313	0.807337	0.798638	0.699062	0.774536	0.766307
Lage3:ENSMUST00000114153.1	0.814857	0.862464	0.912606	0.939531	0.875414	0.894775	0.853552	0.889051	0.932046	0.935101	0.95875	0.965344	0.955234
Jph3:ENSMUST00000026357.11	0.210407	0.15681	0.133444	0.169444	0.0972222	0.134897	0.138845	0.0936556	0.12844	0.109589	0.109422	0.210526	0.117647
Gan:ENSMUST00000064488.10	0.826087	0.903509	0.905775	0.87395	0.8125	0.90835	0.880356	0.825503	0.847645	0.793991	0.936382	0.875	0.883212
Psmd4:ENSMUST00000117355.1	0.682396	0.697727	0.740508	0.674355	0.733119	0.617483	0.680091	0.61024	0.710367	0.626649	0.697241	0.68658	0.692131
Hnrnpl:ENSMUST00000174548.7	0.875	0.900585	0.913866	0.945612	0.897638	0.905651	0.902671	0.824104	0.911968	0.864448	0.896395	0.916462	0.913417
Eno2:ENSMUST00000112476.7	0.187071	0.267477	0.246465	0.202597	0.24082	0.223557	0.289741	0.239308	0.287047	0.215976	0.237558	0.326633	0.299539
Cdk5r1:ENSMUST00000053413.11	0.519685	0.536336	0.582387	0.571712	0.595238	0.523646	0.568802	0.599359	0.494536	0.388795	0.509072	0.527331	0.454787
Rnf166:ENSMUST00000014614.3	0.900552	0.934783	0.923358	0.942568	0.979798	0.913462	0.928384	0.838129	0.929306	0.872108	0.927027	0.940323	0.935788
Dusp3:ENSMUST00000151678.7	0.861918	0.901706	0.919646	0.89098	0.898508	0.896381	0.875092	0.86961	0.853621	0.837127	0.877017	0.779057	0.859404
Fryl:ENSMUST00000101127.11	0.445334	0.444427	0.447737	0.45603	0.420967	0.412189	0.419593	0.415895	0.468143	0.534695	0.511771	0.532813	0.527319
1500009L16Rik:ENSMUST00000150459.2	0.736842	0.661772	0.728173	0.587065	0.738377	0.715391	0.72037	0.533007	0.561213	0.398925	0.635514	0.413793	0.498674
Camsap1:ENSMUST00000114167.8	0.25572	0.260504	0.277373	0.25595	0.246657	0.248677	0.230315	0.245883	0.225378	0.249644	0.261764	0.211444	0.192846
Synm:ENSMUST00000208231.1	0.282928	0.478411	0.537075	0.441304	0.582336	0.505663	0.479888	0.45473	0.471461	0.491291	0.470595	0.543253	0.483174
Ankrd37:ENSMUST00000053558.9	0.904306	0.890173	0.954792	0.946188	0.954301	0.90661	0.919629	0.860215	0.934426	0.92	0.937832	0.915663	0.943443
Txndc16:ENSMUST00000139526.8	0.449167	0.342301	0.378963	0.273522	0.294412	0.259771	0.251511	0.236622	0.185912	0.141553	0.15823	0.129805	0.225689
Ywhaz:ENSMUST00000022894.13	0.620595	0.630591	0.629577	0.579935	0.564237	0.598922	0.599138	0.55189	0.575807	0.534818	0.594378	0.494664	0.557526
Cul5:ENSMUST00000166367.7	0.907216	0.850129	0.846491	0.805714	0.73913	0.799392	0.842448	0.748	0.850318	0.760377	0.806175	0.685393	0.771208
Faim2:ENSMUST00000023750.8	0.547263	0.624915	0.66129	0.564297	0.522648	0.567094	0.590037	0.523824	0.543554	0.429474	0.388131	0.544164	0.550065
3830406C13Rik:ENSMUST00000223702.1	0.559932	0.534237	0.591523	0.620572	0.527081	0.612176	0.599204	0.544757	0.577421	0.533274	0.469283	0.486045	0.517902
Slc44a1:ENSMUST00000107651.8	0.380282	0.236486	0.306509	0.236364	0.111111	0.334661	0.267584	0.130435	0.127106	0.104222	0.206848	0.0967742	0.0827586
Hnrnpab:ENSMUST00000074669.9	0.399377	0.401599	0.378014	0.374994	0.355712	0.395007	0.399953	0.367437	0.435057	0.341203	0.371119	0.370647	0.387381
Ranbp10:ENSMUST00000239468.1	0.894737	0.971311	0.944712	0.794521	0.882353	0.920468	0.931597	0.828125	0.962094	0.888235	0.907937	0.90625	0.957399
Prr5:ENSMUST00000171460.7	0.563429	0.534108	0.557182	0.411765	0.354562	0.444229	0.35874	0.331139	0.381766	0.235616	0.354012	0.168092	0.222403
Zmiz1:ENSMUST00000162645.7	0.906043	0.884115	0.892282	0.882282	0.88515	0.86046	0.857771	0.887957	0.86779	0.903668	0.887189	0.861419	0.883434
Txlna:ENSMUST00000046425.15	0.317743	0.38054	0.423014	0.286666	0.343667	0.395296	0.420418	0.434898	0.358618	0.322758	0.464134	0.296427	0.326078
Crtac1:ENSMUST00000048630.7	0.4375	0.323077	0.32384	0.301802	0.434211	0.393428	0.405663	0.103865	0.37931	0.090883	0.255021	0.411765	0.191781
App:ENSMUST00000227723.1	0.279773	0.280374	0.276911	0.279054	0.270161	0.274488	0.282923	0.260812	0.266676	0.254245	0.283795	0.242931	0.267468
Ncam1:ENSMUST00000114476.7	0.398833	0.497632	0.55519	0.505297	0.442596	0.470549	0.489697	0.559713	0.653335	0.573045	0.438037	0.543749	0.617028
Lima1:ENSMUST00000109024.8	0.666667	0.615385	0.775641	0.719818	0.685714	0.716495	0.673797	0.754286	0.769575	0.721258	0.766917	0.766467	0.811594
Rcbtb2:ENSMUST00000164822.7	0.402544	0.470047	0.461355	0.364074	0.223509	0.436716	0.334988	0.220779	0.381915	0.266527	0.196288	0.219968	0.190696
Mindy2:ENSMUST00000049031.5	0.355804	0.438273	0.455978	0.401802	0.302825	0.412206	0.336633	0.378123	0.490868	0.438073	0.446813	0.385606	0.464843
Rhbdd2:ENSMUST00000043707.6	0.315705	0.216539	0.216249	0.233166	0.16837	0.208737	0.199566	0.191219	0.243978	0.238274	0.186122	0.239588	0.240666
Trim56:ENSMUST00000054384.5	1	0.905279	0.69624	0.757956	1	0.833333	0.680845	0.663272	0.798128	0.725955	0.756185	0.703291	0.774256
Kcnma1:ENSMUST00000145596.2	0.550359	0.614578	0.597996	0.544913	0.541368	0.587109	0.584844	0.486244	0.594243	0.466772	0.662141	0.563538	0.581548
Gpatch8:ENSMUST00000143842.1	0.5	0.56231	0.540733	0.546667	0.544	0.52071	0.528729	0.462532	0.448492	0.400853	0.426894	0.415254	0.497354
Ntrk3:ENSMUST00000039431.13	0.31501	0.408525	0.462836	0.329627	0.334103	0.390574	0.397613	0.532594	0.231695	0.352172	0.458589	0.390856	0.362354
Dnajc10:ENSMUST00000028392.7	0.531045	0.452376	0.477446	0.458069	0.449669	0.453314	0.487709	0.443916	0.463903	0.429801	0.434048	0.444068	0.482471
Tmem200a:ENSMUST00000218232.1	0.947368	0.889831	0.896552	0.84	0.878788	0.824047	0.871089	0.76699	0.777778	0.909091	0.942029	1	0.75
Lhfpl5:ENSMUST00000080780.7	1	0.854167	0.819527	0.829457	1	0.625641	0.898089	0.256528	0.8125	0.521739	0.833333	1	0.875
Cacybp:ENSMUST00000014370.10	0.706478	0.668248	0.679019	0.685487	0.692951	0.6695	0.660864	0.566486	0.678342	0.618418	0.687793	0.693117	0.660239
Ksr2:ENSMUST00000180430.1	0.909828	0.89357	0.915758	0.895094	0.897952	0.906583	0.897118	0.855179	0.911339	0.962335	0.93505	0.954802	0.924738
Pabpc4:ENSMUST00000106243.7	0.953125	0.945946	0.972603	0.957935	0.921053	0.925	0.934238	0.832558	0.9591	0.892086	0.955836	0.939394	0.942257
Prdm2:ENSMUST00000105778.7	0.547023	0.623619	0.654401	0.660628	0.554393	0.608826	0.609247	0.577784	0.555406	0.51561	0.62701	0.59123	0.6019
Rab5c:ENSMUST00000107364.7	0.706638	0.702266	0.709397	0.705804	0.69173	0.704951	0.704315	0.575026	0.708504	0.564324	0.689884	0.708147	0.713515
Gadd45b:ENSMUST00000015456.9	0.8	0.666667	0.873418	0.86747	0.863636	0.863924	0.887213	0.76938	0.896985	0.602628	0.805825	0.865957	0.845699
Phyhipl:ENSMUST00000046513.9	0.212148	0.198949	0.216523	0.187793	0.194957	0.171363	0.179934	0.135723	0.164366	0.121629	0.119767	0.151901	0.14904
Ptp4a1:ENSMUST00000233506.1	0.306967	0.30975	0.357575	0.272198	0.278678	0.289112	0.342894	0.285541	0.363205	0.263375	0.323836	0.25077	0.291558
B2m:ENSMUST00000102476.4	0.315709	0.540554	0.708653	0.782414	0.797621	0.857525	0.805954	0.820036	0.737663	0.811721	0.817337	0.751078	0.75335
Bcl7a:ENSMUST00000031391.8	0.620553	0.703151	0.765082	0.635253	0.642857	0.654358	0.68951	0.659763	0.731025	0.587387	0.722265	0.668269	0.711864
Desi1:ENSMUST00000152227.7	0.646295	0.64288	0.684411	0.655327	0.560455	0.644854	0.62554	0.516966	0.740081	0.575434	0.584532	0.558795	0.551585
Ppp1r2:ENSMUST00000115233.1	0.758621	0.839416	0.847656	0.743961	0.64	0.757991	0.820417	0.748792	0.730832	0.72093	0.622163	0.532895	0.613577
Jakmip1:ENSMUST00000043794.10	0.361702	0.232772	0.273071	0.167568	0.223684	0.15201	0.208451	0.112412	0.212766	0.225806	0.29078	0.45	0.175
Pgap1:ENSMUST00000097739.4	0.607451	0.597174	0.589147	0.533783	0.578977	0.627006	0.467055	0.654129	0.631025	0.538878	0.557182	0.558128	0.589449
Megf9:ENSMUST00000107359.8	0.55338	0.577124	0.608857	0.573978	0.520197	0.611696	0.579524	0.553343	0.574914	0.539896	0.564183	0.525707	0.585418
Mettl26:ENSMUST00000169308.7	0.785867	0.83977	0.860383	0.850457	0.892045	0.82807	0.809186	0.770742	0.848931	0.78549	0.854569	0.843972	0.852704
Klhl28:ENSMUST00000222508.1	0.738347	0.691097	0.704427	0.550328	0.316248	0.579235	0.56883	0.596187	0.59362	0.382147	0.60605	0.450859	0.514095
Unc80:ENSMUST00000061620.16	0.578326	0.636986	0.639358	0.580258	0.612259	0.608756	0.581936	0.573286	0.592286	0.567334	0.671589	0.689657	0.651495
Zfp955b:ENSMUST00000099414.4	0.443672	0.520615	0.556349	0.428766	0.324153	0.430958	0.41725	0.478139	0.399175	0.397264	0.377031	0.387235	0.419954
Tlk2:ENSMUST00000106939.8	0.645833	0.688822	0.706219	0.674825	0.723926	0.587688	0.671191	0.618182	0.660679	0.62753	0.684255	0.692308	0.65535
Camk2a:ENSMUST00000102888.9	0.736606	0.663306	0.717275	0.69392	0.695592	0.626932	0.631161	0.66883	0.746096	0.638573	0.708699	0.68104	0.674376
Dusp5:ENSMUST00000038287.6	0.880309	0.921569	0.918216	0.961538	0.727273	0.876543	0.827394	0.71875	0.773196	0.560811	0.833333	0.783333	0.641026
Brd1:ENSMUST00000109381.8	0.51145	0.65	0.619619	0.578313	0.620253	0.606036	0.606581	0.567657	0.533917	0.551479	0.537341	0.509259	0.492083
Nxn:ENSMUST00000021204.3	0.336842	0.357616	0.385057	0.287879	0.383117	0.356322	0.259259	0.278846	0.257943	0.19186	0.309524	0.307692	0.208784
Znhit1:ENSMUST00000111090.8	0.95229	0.933645	0.959762	0.950673	0.942748	0.924232	0.92351	0.846856	0.939854	0.884016	0.937638	0.957711	0.942849
Usp10:ENSMUST00000108988.8	0.831776	0.895792	0.930546	0.892128	0.9	0.898148	0.909918	0.816143	0.881706	0.856061	0.900202	0.896552	0.905738
Lcor:ENSMUST00000067795.12	0.366356	0.325975	0.400261	0.353464	0.282231	0.347446	0.386427	0.336703	0.415754	0.380941	0.520528	0.400005	0.401369
Atxn1l:ENSMUST00000093162.3	0.753846	0.832335	0.842508	0.8125	0.790698	0.760829	0.817181	0.713542	0.696798	0.619048	0.704997	0.638889	0.563291
Gm10053:ENSMUST00000073080.6	0.388019	0.350248	0.37845	0.318575	0.369724	0.387922	0.366829	0.390399	0.378155	0.35682	0.341748	0.366193	0.313832
Git2:ENSMUST00000112185.8	0.694654	0.644	0.671726	0.483452	0.609427	0.610775	0.576115	0.550224	0.529034	0.427257	0.52819	0.394836	0.518617
Cask:ENSMUST00000115436.8	0.722023	0.858303	0.817883	0.680952	0.736231	0.754848	0.790281	0.6005	0.546944	0.593989	0.539918	0.191582	0.470628
Cdc14b:ENSMUST00000039318.15	0.425905	0.411014	0.441384	0.415975	0.40076	0.400291	0.414929	0.374013	0.38274	0.392447	0.403332	0.395186	0.49602
Sync:ENSMUST00000102599.3	0.848036	0.901252	0.932121	1	1	0.90188	0.878592	0.836414	0.814874	0.820452	0.527876	NA	0.835885
Itm2b:ENSMUST00000022704.8	0.561939	0.486762	0.579869	0.463111	0.497745	0.410113	0.484835	0.288127	0.523951	0.402705	0.493178	0.457421	0.436724
Cd59a:ENSMUST00000040423.11	0.761584	0.715591	0.720554	0.705863	0.69121	0.712687	0.720078	0.612868	0.699315	0.605153	0.735539	0.637961	0.641597
Ptp4a2:ENSMUST00000165853.1	0.450503	0.523264	0.526591	0.535049	0.560878	0.499416	0.520639	0.459804	0.489736	0.493409	0.510117	0.480297	0.533772
Lap3:ENSMUST00000046122.10	0.506453	0.611169	0.548265	0.439417	0.533664	0.433789	0.500597	0.510765	0.531879	0.444622	0.533072	0.436589	0.43686
Cpne2:ENSMUST00000048653.9	0.166667	0.172185	0.212982	0.180556	0.243346	0.313131	0.229336	0.0852459	0.173333	0.0902662	0.125	0.222222	0.134199
Zfp423:ENSMUST00000165770.8	0.934756	0.864983	0.901388	0.84143	0.831922	0.874631	0.880647	0.878868	0.894404	0.884574	0.837768	0.888925	0.808458
Ssr1:ENSMUST00000021864.7	0.47578	0.404654	0.435333	0.358686	0.388368	0.475747	0.492833	0.319484	0.332502	0.27996	0.320867	0.187897	0.26697
Bean1:ENSMUST00000093245.12	0.473684	0.570248	0.550696	0.46875	0.41791	0.515289	0.563994	0.557864	0.62069	0.163043	0.4	0.5	0.45283
Dock3:ENSMUST00000044532.10	0.308729	0.417945	0.461923	0.455546	0.401821	0.451839	0.414573	0.395475	0.287103	0.269136	0.251964	0.43145	0.401046
Slc4a4:ENSMUST00000148750.7	0.86132	0.908614	0.900807	0.830771	0.857373	0.853262	0.84653	0.65678	0.925309	0.891044	0.929647	0.910771	0.910473
Zfp445:ENSMUST00000216063.1	0.738197	0.778434	0.735791	0.709273	0.697183	0.709126	0.711715	0.712014	0.737236	0.659476	0.750084	0.715686	0.764249
Prkcb:ENSMUST00000064989.11	0.476928	0.532712	0.598442	0.563103	0.505811	0.564615	0.530929	0.528243	0.50233	0.52021	0.570971	0.49678	0.547263
Cyb5d1:ENSMUST00000108660.7	0.953143	0.950741	0.923011	0.929062	0.927285	0.916135	0.931736	0.890612	0.923559	0.892648	0.930329	0.94764	0.946777
Tmem132c:ENSMUST00000119026.7	0.66492	0.7727	0.729973	0.858167	0.678533	0.733308	0.75395	0.569183	0.828746	0.654344	0.64692	1	0.471238
Celf1:ENSMUST00000068726.12	0.532779	0.632195	0.620588	0.481499	0.569589	0.600026	0.579979	0.672185	0.630854	0.589251	0.800597	0.413451	0.672679
Ftsj1:ENSMUST00000033513.9	0.626016	0.879408	0.677	0.406824	0.550336	0.534532	0.552659	0.665116	0.415686	0.429454	0.328653	0.341085	0.280146
Ngly1:ENSMUST00000022310.6	0.159091	0.148148	0.12743	0.103627	0.0833333	0.0953206	0.147004	0.0684932	0.0899183	0.0738916	0.112311	0.107362	0.0938914
Dgke:ENSMUST00000107894.7	0.690374	0.720542	0.734207	0.700867	0.693603	0.665835	0.708945	0.641505	0.673928	0.517228	0.759625	0.637504	0.634981
Tacc1:ENSMUST00000084512.10	0.61039	0.778723	0.771787	0.754237	0.710526	0.807816	0.75708	0.68018	0.801553	0.785055	0.718931	0.682243	0.806582
Mthfs:ENSMUST00000085256.7	0.15051	0.13964	0.167622	0.167665	0.188184	0.110236	0.134495	0.0621572	0.147633	0.0663959	0.136805	0.142791	0.14635
Srpk2:ENSMUST00000088392.8	0.28911	0.304353	0.31654	0.240777	0.306377	0.332706	0.326013	0.235703	0.191377	0.173872	0.170618	0.246169	0.24303
Parp1:ENSMUST00000027777.11	0.721311	0.723982	0.71034	0.668394	0.710526	0.762102	0.700684	0.693966	0.585448	0.576699	0.639521	0.585492	0.613074
Spred1:ENSMUST00000028829.12	0.691973	0.700231	0.711334	0.675551	0.656645	0.664788	0.649237	0.595249	0.637456	0.553456	0.737757	0.620554	0.647035
Ablim1:ENSMUST00000079360.11	0.6474	0.68657	0.69697	0.672409	0.678211	0.666821	0.671719	0.654851	0.702085	0.677867	0.682103	0.730604	0.684458
Ostf1:ENSMUST00000025631.6	0.561712	0.684278	0.715213	0.652432	0.700535	0.755914	0.670259	0.572444	0.636267	0.553834	0.677011	0.652082	0.597091
Dynlt1c:ENSMUST00000092966.4	0.124483	0.124158	0.181665	0.183528	0.242727	0.149429	0.181883	0.0841974	0.20333	0.11798	0.17777	0.177546	0.201488
Daam1:ENSMUST00000223272.1	0.685502	0.761805	0.784301	0.756721	0.658314	0.770435	0.733541	0.689813	0.682848	0.634168	0.677117	0.593706	0.732186
Apba2:ENSMUST00000032732.14	0.175351	0.274485	0.237308	0.290923	0.185542	0.223892	0.278892	0.233702	0.282808	0.352815	0.368053	0.212121	0.24375
Tle5:ENSMUST00000002518.8	0.190145	0.208756	0.182887	0.19735	0.210599	0.139675	0.180721	0.099169	0.202134	0.0861667	0.135639	0.182596	0.171691
Lmo4:ENSMUST00000121796.7	0.270408	0.256637	0.258627	0.237194	0.285211	0.176103	0.23941	0.172932	0.237179	0.174496	0.277228	0.244552	0.25558
Cdk7:ENSMUST00000091299.7	0.513889	0.651893	0.66463	0.335928	0.533278	0.625901	0.561334	0.492856	0.434153	0.31609	0.542019	0.0633877	0.208441
Zyg11b:ENSMUST00000043616.6	0.649082	0.5622	0.552159	0.564775	0.554133	0.562351	0.556512	0.554423	0.558594	0.553672	0.573658	0.569754	0.563334
Fam219b:ENSMUST00000093833.5	0.437926	0.684894	0.598778	0.636909	0.53975	0.472482	0.63538	0.603028	0.795647	0.632622	0.732586	0.472503	0.693122
Mettl1:ENSMUST00000120542.7	0.294635	0.33902	0.379486	0.244811	0.209346	0.240825	0.307034	0.30896	0.243908	0.214318	0.202735	0.154107	0.167096
Pirt:ENSMUST00000123434.2	NA	0.861635	0.823621	0.666667	0.25	0.635669	0.928122	0.779468	0.740618	0.790464	0.77243	1	0.703504
Tet3:ENSMUST00000089622.10	0.628571	0.601093	0.641926	0.671815	0.380952	0.569767	0.680758	0.533654	0.648995	0.587619	0.679417	0.696262	0.668156
Usp46:ENSMUST00000119154.7	0.70031	0.719204	0.720326	0.64968	0.726705	0.705899	0.721092	0.53621	0.694136	0.559042	0.523856	0.467845	0.547357
Gtf2h5:ENSMUST00000039487.9	0.128708	0.146531	0.150059	0.136589	0.117864	0.138496	0.126821	0.133926	0.105195	0.109621	0.0972997	0.103219	0.0950977
H2bc4:ENSMUST00000018246.5	0.680556	0.716146	0.743879	0.636424	0.779221	0.696203	0.709145	0.654242	0.723237	0.660438	0.723225	0.694362	0.706796
Gspt1:ENSMUST00000167571.7	0.863996	0.827285	0.835339	0.506649	0.807167	0.824832	0.802274	0.59302	0.605952	0.371194	0.615177	0.247233	0.412802
Rpl22:ENSMUST00000139685.7	0.21682	0.188781	0.191708	0.213113	0.153166	0.268403	0.251713	0.182469	0.205416	0.134149	0.18493	0.0437466	0.0629993
Narf:ENSMUST00000103015.3	0.937898	0.909204	0.922314	0.914778	0.900187	0.886059	0.915853	0.738751	0.907929	0.848669	0.920378	0.913324	0.920653
Pfkl:ENSMUST00000020522.8	0.189516	0.216028	0.256046	0.182243	0.239286	0.158404	0.159355	0.141593	0.188791	0.138122	0.177419	0.151515	0.164131
Mrpl10:ENSMUST00000001485.9	0.877161	0.882879	0.909312	0.88712	0.864185	0.850982	0.890657	0.882667	0.885568	0.885446	0.875005	0.88885	0.896778
Ash1l:ENSMUST00000186583.6	0.544621	0.615654	0.623792	0.637879	0.569142	0.598725	0.604967	0.578422	0.594868	0.56685	0.615926	0.615301	0.635946
Dgkh:ENSMUST00000226342.2	0.853503	0.767507	0.800305	0.823864	0.714286	0.781058	0.803654	0.631579	0.75	0.721014	0.847222	0.764706	0.767089
Tut7:ENSMUST00000071703.5	0.447759	0.543963	0.543007	0.527491	0.444557	0.48892	0.468315	0.480438	0.489303	0.439726	0.517125	0.443384	0.500031
Opa3:ENSMUST00000063976.8	0.447553	0.573268	0.601306	0.411736	0.49814	0.533027	0.535998	0.562161	0.561992	0.509829	0.540553	0.546208	0.543169
Map4k5:ENSMUST00000110567.7	0.881635	0.840976	0.877343	0.870797	0.827324	0.838629	0.855438	0.827696	0.882753	0.821761	0.888942	0.875264	0.824219
Zbtb7a:ENSMUST00000048128.14	0.765497	0.791775	0.799403	0.749419	0.76368	0.784519	0.77536	0.702551	0.72498	0.651766	0.759708	0.662988	0.735329
Nucb1:ENSMUST00000211765.1	0.113827	0.151678	0.121056	0.0405365	0.0730499	0.0963001	0.086303	0.0760465	0.0741037	0.0403069	0.0585324	0.0374109	0.0514712
Tma7:ENSMUST00000167504.2	0.224705	0.171496	0.208844	0.235561	0.236463	0.18972	0.216449	0.0551593	0.185589	0.10127	0.198083	0.216037	0.159139
Kansl1:ENSMUST00000106977.7	0.797386	0.732353	0.749032	0.813268	0.740964	0.725015	0.795986	0.741667	0.725649	0.727134	0.788217	0.852792	0.812283
Ankrd12:ENSMUST00000038116.12	0.592076	0.576454	0.586228	0.546072	0.501316	0.609671	0.516824	0.564411	0.50881	0.492918	0.482097	0.469576	0.469808
Ccdc174:ENSMUST00000037783.6	0.757895	0.810742	0.857576	0.738462	0.728972	0.821953	0.858419	0.674157	0.7	0.580488	0.640558	0.583333	0.583178
Senp7:ENSMUST00000089362.8	0.512821	0.456667	0.495298	0.60221	0.568421	0.482365	0.527574	0.574468	0.47139	0.684543	0.590374	0.661538	0.650558
Ets1:ENSMUST00000184887.1	0.993801	0.995351	0.923114	0.487402	0.364647	0.804429	0.855074	0.821285	0.779122	0.816036	0.665438	0.729697	0.839706
Crot:ENSMUST00000003720.4	0.807692	0.780822	0.773163	0.815789	0.826087	0.732394	0.79403	0.637255	0.770007	0.646328	0.757009	0.785978	0.786561
Azin1:ENSMUST00000065308.12	0.846205	0.820536	0.892073	0.807171	0.849408	0.875927	0.878284	0.585938	0.772897	0.545898	0.734363	0.47961	0.592973
Enpp4:ENSMUST00000024757.13	0.533333	0.735294	0.767888	0.443299	0.4875	0.663462	0.688979	0.615741	0.693034	0.537291	0.664933	0.492063	0.672611
Ak6:ENSMUST00000022135.14	0.784236	0.803662	0.817283	0.807186	0.789456	0.807369	0.793182	0.710574	0.804609	0.721955	0.809019	0.761087	0.771913
Luc7l:ENSMUST00000119928.7	0.786025	0.909131	0.889966	0.770182	0.838582	0.829998	0.82663	0.820244	0.813437	0.701894	0.818061	0.786389	0.818485
Vezf1:ENSMUST00000018521.10	0.566735	0.600371	0.611606	0.463814	0.494673	0.560879	0.581296	0.468103	0.559974	0.495021	0.557339	0.474037	0.555337
Foxn3:ENSMUST00000046859.11	0.459788	0.528611	0.538566	0.36541	0.363864	0.443925	0.434594	0.374996	0.570765	0.399858	0.386168	0.431887	0.528382
Tdrd3:ENSMUST00000168275.8	0.653543	0.604545	0.600969	0.616056	0.610526	0.581512	0.614676	0.556034	0.637722	0.574837	0.620229	0.59292	0.609865
Igf1r:ENSMUST00000005671.9	0.751575	0.738106	0.751471	0.742471	0.688182	0.74874	0.743882	0.723649	0.704192	0.732607	0.715014	0.707674	0.716535
Gpt2:ENSMUST00000034136.11	0.930417	0.92757	0.923846	0.897993	0.867997	0.916005	0.920559	0.884852	0.936309	0.912712	0.908031	0.902736	0.891633
Plxna3:ENSMUST00000004326.3	0.780965	0.826235	0.794164	0.831334	0.790225	0.811088	0.777808	0.796412	0.795757	0.783651	0.783596	0.854606	0.733078
Gle1:ENSMUST00000019859.8	0.871987	0.909178	0.89494	0.87848	0.877916	0.896234	0.905362	0.719916	0.88584	0.667442	0.828808	0.809764	0.834974
Trim24:ENSMUST00000031859.13	0.189286	0.165169	0.189651	0.189305	0.143611	0.217389	0.19379	0.194128	0.199493	0.201823	0.173778	0.235033	0.172413
Chml:ENSMUST00000209720.1	0.833333	0.789256	0.778058	0.864865	0.619048	0.603412	0.786391	0.697917	0.767857	0.704225	0.780702	0.894737	0.861538
Sdhaf3:ENSMUST00000040826.5	0.0884335	0.0858828	0.122405	0.0788198	0.0742382	0.0954999	0.0739066	0.10535	0.073528	0.0885953	0.0630034	0.050122	0.0685781
Rnf170:ENSMUST00000014022.14	0.844415	0.86242	0.860017	0.725551	0.714518	0.814131	0.824511	0.71548	0.824774	0.705319	0.671468	0.666894	0.656202
Nfic:ENSMUST00000078185.13	0.551367	0.636432	0.636197	0.552032	0.520275	0.549824	0.588596	0.594008	0.666407	0.570045	0.620382	0.412192	0.599324
Ifnar1:ENSMUST00000023689.10	0.486601	0.527728	0.533145	0.510024	0.406606	0.534233	0.405843	0.553532	0.228727	0.303105	0.470156	0.258501	0.443402
Kcnt1:ENSMUST00000037580.12	0.491747	0.364803	0.407107	0.403627	0.404119	0.405115	0.388963	0.459687	0.445207	0.445424	0.403449	0.510991	0.513058
Cdc37l1:ENSMUST00000225210.1	0.809288	0.785392	0.798285	0.726837	0.700166	0.75046	0.735516	0.764861	0.801266	0.708933	0.794379	0.659854	0.698503
Dgki:ENSMUST00000101532.9	0.957143	0.942993	0.938754	0.881356	0.922535	0.916961	0.920579	0.772477	0.968652	0.857143	0.938808	0.947368	0.923077
Rab3gap1:ENSMUST00000037649.5	0.541176	0.699411	0.686246	0.585714	0.702564	0.680338	0.683839	0.550432	0.638009	0.516187	0.583271	0.613734	0.636752
Samd4b:ENSMUST00000208199.1	0.260404	0.405908	0.371486	0.463349	0.388007	0.42594	0.396265	0.402665	0.382654	0.415287	0.445792	0.355705	0.449098
Coro2a:ENSMUST00000030021.13	0.481928	0.525727	0.495406	0.45098	0.628571	0.446341	0.493229	0.388797	0.466667	0.330579	0.535714	0.357143	0.517241
Ino80d:ENSMUST00000165066.7	0.74359	0.666667	0.679621	0.719298	0.56	0.694617	0.735271	0.631229	0.690154	0.616667	0.691877	0.739394	0.732785
Fam104a:ENSMUST00000120194.1	0.165628	0.201771	0.209354	0.1797	0.157382	0.162922	0.16005	0.208612	0.174321	0.192962	0.173422	0.190771	0.164607
Edem1:ENSMUST00000089162.4	0.502514	0.631696	0.56841	0.488703	0.495173	0.598249	0.569292	0.54402	0.493797	0.42887	0.450073	0.27878	0.379854
Map1b:ENSMUST00000064762.5	0.918992	0.941789	0.941303	0.940848	0.925022	0.945831	0.919539	0.899414	0.90221	0.811464	0.915536	0.846829	0.920936
Arhgap5:ENSMUST00000219443.1	0.294093	0.276105	0.298541	0.363097	0.274842	0.297823	0.275416	0.317221	0.310163	0.311415	0.288267	0.284832	0.316671
Ppfia3:ENSMUST00000211067.1	0.253247	0.253145	0.246325	0.284153	0.290909	0.187565	0.224228	0.178744	0.266949	0.236842	0.332237	0.24	0.314286
Sez6l2:ENSMUST00000106335.7	0.688119	0.72541	0.694722	0.612565	0.737151	0.723288	0.643986	0.413043	0.586331	0.491228	0.655433	0.636364	0.624309
Homer1:ENSMUST00000079086.7	0.416237	0.362692	0.382122	0.262814	0.33087	0.362039	0.294954	0.253673	0.339335	0.265025	0.320534	0.236949	0.338948
Abcd4:ENSMUST00000223107.1	0.182892	0.135769	0.192191	0.109949	0.157338	0.11854	0.115488	0.135513	0.112883	0.0780116	0.0965992	0.0544956	0.122185
Fam160b1:ENSMUST00000036407.5	0.67253	0.734724	0.790194	0.640266	0.668407	0.726418	0.693128	0.627354	0.720783	0.596946	0.69477	0.708043	0.703775
Pgm2l1:ENSMUST00000084935.10	0.47836	0.485189	0.485089	0.538046	0.529377	0.510195	0.498381	0.559176	0.454959	0.496848	0.411965	0.432234	0.496099
3110040N11Rik:ENSMUST00000026092.8	0.609833	0.511515	0.498614	0.534387	0.546889	0.456265	0.46098	0.485046	0.546252	0.52674	0.558685	0.570828	0.549174
Braf:ENSMUST00000002487.14	0.957411	0.95594	0.94469	0.945568	0.945847	0.954686	0.94233	0.930799	0.935657	0.902892	0.924683	0.905505	0.933594
Nlk:ENSMUST00000142739.7	0.713991	0.662761	0.692146	0.654008	0.686619	0.659117	0.700487	0.593193	0.693654	0.631096	0.647749	0.666329	0.679054
Pbdc1:ENSMUST00000119477.1	0.889284	0.731891	0.760508	0.784827	0.602669	0.762827	0.755284	0.736907	0.706765	0.666196	0.649399	0.647701	0.696967
Fbxo21:ENSMUST00000202447.3	0.948655	0.910134	0.915186	0.882009	0.907044	0.917733	0.926109	0.892592	0.884106	0.865175	0.882818	0.819966	0.828533
Tmem254a:ENSMUST00000185006.8	0.244186	0.234146	0.232126	0.156085	0.24375	0.156139	0.202289	0.134844	0.184111	0.107903	0.244493	0.2	0.162805
Msl1:ENSMUST00000037915.8	0.354331	0.395181	0.43473	0.372093	0.34026	0.411277	0.436877	0.435438	0.345349	0.302307	0.434329	0.408284	0.440384
Dctn1:ENSMUST00000113913.7	0.943005	0.908304	0.940111	0.893285	0.91684	0.857001	0.818569	0.772043	0.880765	0.813046	0.889738	0.874494	0.888641
Abcc5:ENSMUST00000096199.4	0.61157	0.71063	0.710699	0.677524	0.733766	0.599682	0.671879	0.633745	0.680774	0.605856	0.686754	0.680952	0.708661
Dctn2:ENSMUST00000026479.10	0.390966	0.341862	0.360362	0.327869	0.388282	0.269498	0.307322	0.169692	0.329379	0.190372	0.313662	0.318525	0.293024
Slc43a2:ENSMUST00000042561.13	0.692308	0.751232	0.700285	0.552239	0.672269	0.706137	0.722256	0.692623	0.506835	0.416073	0.539914	0.372751	0.609937
Tbck:ENSMUST00000169172.4	0.877405	0.859799	0.859783	0.890621	0.877558	0.861116	0.882476	0.79555	0.812981	0.841518	0.864142	0.819387	0.851015
U2af1:ENSMUST00000166526.8	0.14011	0.168096	0.132308	0.216207	0.147078	0.112732	0.220136	0.10488	0.224955	0.117136	0.129204	0.280615	0.234022
Chchd5:ENSMUST00000035481.4	0.534694	0.517028	0.580177	0.512195	0.593472	0.587652	0.564354	0.468085	0.476729	0.464259	0.521562	0.339623	0.388459
Dele1:ENSMUST00000025314.6	0.840816	0.840934	0.858559	0.838031	0.871485	0.869333	0.847806	0.694307	0.864588	0.757125	0.843188	0.822458	0.849053
Foxp1:ENSMUST00000113326.8	0.312736	0.32363	0.342982	0.313031	0.337817	0.315544	0.320442	0.257671	0.325001	0.214014	0.309568	0.314059	0.308904
Hdac5:ENSMUST00000008999.11	0.237443	0.248494	0.300929	0.268519	0.268939	0.205736	0.231326	0.118959	0.239143	0.136568	0.254457	0.232719	0.256917
Usp13:ENSMUST00000072312.11	0.260319	0.535326	0.498932	0.406895	0.410058	0.444336	0.454679	0.416225	0.337401	0.255107	0.363344	0.494928	0.247843
Eef1a2:ENSMUST00000055990.7	0.346074	0.208219	0.35603	0.269773	0.232493	0.31151	0.208192	0.198561	0.182121	0.197011	0.150165	0.154385	0.157863
Agpat3:ENSMUST00000001240.11	0.832284	0.817064	0.842645	0.693364	0.676114	0.789216	0.758691	0.527363	0.543008	0.399174	0.426098	0.37932	0.360153
Dnal1:ENSMUST00000123491.7	0.876923	0.927911	0.93985	0.882653	0.884615	0.856372	0.893872	0.718085	0.875949	0.773408	0.86631	0.857143	0.856
Rsl24d1:ENSMUST00000034738.13	0.948097	0.904404	0.938413	0.941935	0.954802	0.894098	0.909455	0.754573	0.934124	0.804695	0.92	0.909483	0.93012
Uggt1:ENSMUST00000046875.13	0.285706	0.267498	0.273097	0.214791	0.24769	0.280432	0.238985	0.251648	0.141211	0.124149	0.182986	0.117222	0.120115
Kcnc3:ENSMUST00000207493.1	0.734987	0.678571	0.826125	0.721757	0.670139	0.733945	0.742349	0.556701	0.695349	0.552549	0.683938	0.823529	0.755556
Fam241a:ENSMUST00000057198.8	0.460859	0.473465	0.484552	0.504132	0.216253	0.494533	0.498671	0.438842	0.462367	0.417627	0.490039	0.513717	0.388
Gpbp1:ENSMUST00000047627.13	0.403226	0.483568	0.479107	0.364767	0.469466	0.479257	0.448387	0.319672	0.405932	0.282748	0.350825	0.284254	0.29023
Sncb:ENSMUST00000036825.13	0.942097	0.914639	0.919594	0.919952	0.917617	0.873104	0.893988	0.718873	0.901244	0.856061	0.886026	0.866324	0.868066
Ruvbl2:ENSMUST00000211214.1	0.342466	0.277778	0.27541	0.220652	0.45283	0.2116	0.255572	0.113924	0.240449	0.103583	0.230065	0.227621	0.235849
Fxyd1:ENSMUST00000205807.1	0.875912	0.797101	0.580589	0.634921	0.860759	0.776	0.727421	0.523641	0.497059	0.487283	0.5	0.567568	0.488467
Nacc2:ENSMUST00000114159.8	0.459627	0.582069	0.613421	0.54007	0.381818	0.518711	0.534988	0.389937	0.506554	0.396734	0.471117	0.412776	0.442308
Ahsa2:ENSMUST00000109539.7	0.314644	0.266349	0.326131	0.2588	0.259318	0.286651	0.292008	0.251979	0.314355	0.255654	0.26766	0.252419	0.215191
Zfhx3:ENSMUST00000220518.1	0.5	0.524865	0.578787	0.535794	0.458472	0.569069	0.456125	0.472061	0.48947	0.44419	0.473999	0.497328	0.468155
Eps15:ENSMUST00000102729.9	0.862184	0.867969	0.906709	0.801738	0.836249	0.891055	0.887031	0.813715	0.778821	0.761788	0.800649	0.63441	0.713986
Psen2:ENSMUST00000111106.7	0.58427	0.772358	0.722876	0.560976	0.565217	0.640127	0.595499	0.436314	0.671233	0.462783	0.706294	0.593103	0.626582
Llph:ENSMUST00000020444.15	0.413099	0.399648	0.386201	0.448341	0.406741	0.429666	0.400851	0.335277	0.475964	0.393469	0.475267	0.450662	0.438488
Slc25a4:ENSMUST00000034049.4	0.769958	0.693436	0.714725	0.727601	0.796177	0.729452	0.746832	0.506301	0.609103	0.40055	0.330067	0.641375	0.42205
Sec11a:ENSMUST00000026818.11	0.43662	0.445479	0.449739	0.367901	0.522124	0.417269	0.448646	0.413462	0.558834	0.450405	0.600325	0.553719	0.509465
Glcci1:ENSMUST00000064285.14	0.583704	0.59814	0.629851	0.574655	0.407035	0.56537	0.594189	0.551648	0.538686	0.507543	0.574296	0.466956	0.559947
Chid1:ENSMUST00000153191.7	0.328786	0.223074	0.206993	0.190549	0.209808	0.207707	0.201148	0.174854	0.225221	0.178219	0.229956	0.171597	0.181839
Fkbp4:ENSMUST00000032508.10	0.779692	0.748479	0.764966	0.64101	0.669355	0.721073	0.655102	0.676808	0.520159	0.467703	0.560327	0.490295	0.568743
Tro:ENSMUST00000112709.7	0.332174	0.345857	0.354801	0.357072	0.350699	0.332922	0.334429	0.350554	0.346712	0.361769	0.319464	0.280333	0.289005
Rabgap1l:ENSMUST00000028049.12	0.193277	0.20438	0.140515	0.148515	0.125	0.0576923	0.189655	0.223881	0.181102	0.432526	0.15641	0.521739	0.326087
2610001J05Rik:ENSMUST00000139231.1	0.583197	0.646264	0.688122	0.623446	0.655985	0.637862	0.647565	0.578445	0.673727	0.59632	0.655016	0.635795	0.644391
Lsm12:ENSMUST00000107156.8	0.276747	0.248939	0.311801	0.199386	0.264711	0.251727	0.25052	0.201698	0.337961	0.24831	0.261479	0.244625	0.268684
Tomm20:ENSMUST00000179857.2	0.13962	0.210566	0.241123	0.0993549	0.155395	0.149847	0.186635	0.178746	0.0919219	0.067975	0.0841769	0.0499112	0.0503586
Gab2:ENSMUST00000004622.6	0.142324	0.172691	0.191111	0.200685	0.223978	0.180871	0.206975	0.283445	0.220005	0.245486	0.223554	0.278153	0.21799
Nol3:ENSMUST00000014920.7	0.466093	0.353093	0.311075	0.389872	0.207578	0.36133	0.330104	0.217196	0.312059	0.242129	0.28869	0.345683	0.348984
Kctd3:ENSMUST00000085678.7	0.934132	0.915789	0.923698	0.902913	0.910714	0.896941	0.903148	0.716724	0.912908	0.730159	0.901904	0.904762	0.889151
Enah:ENSMUST00000193703.5	0.513947	0.514636	0.518527	0.436441	0.536516	0.521936	0.499	0.473387	0.347818	0.327926	0.376298	0.523854	0.31792
Syt11:ENSMUST00000107503.7	0.650824	0.637725	0.637891	0.635639	0.680732	0.617729	0.644195	0.590125	0.668393	0.62208	0.654252	0.644846	0.65903
Lemd2:ENSMUST00000055117.8	0.444444	0.455224	0.412875	0.482517	0.585714	0.423926	0.448185	0.291667	0.309524	0.290323	0.343662	0.463235	0.391236
St3gal6:ENSMUST00000137035.7	0.112342	0.255401	0.309652	0.0393197	0.287376	0.230113	0.212733	0.205444	0.238709	0.176152	0.21535	0.136919	0.145066
Naaa:ENSMUST00000113102.9	0.203125	0.489899	0.4846	0.3125	0.375	0.383234	0.447183	0.251634	0.175899	0.240243	0.366391	0.177778	0.225806
Kcng3:ENSMUST00000234613.1	0.0185185	0.638964	0.558419	0.245947	0.321429	0.5016	0.632152	0.505608	0.0342464	0.0349706	0.0145985	0.333333	0.0727532
Gm12184:ENSMUST00000104959.1	0.28626	0.273026	0.310598	0.276807	0.360656	0.187546	0.256202	0.136662	0.28473	0.198192	0.281228	0.288889	0.308734
Zfp830:ENSMUST00000056677.7	0.357804	0.288355	0.350654	0.280608	0.302696	0.375378	0.366032	0.366757	0.346413	0.278047	0.317883	0.224617	0.280228
Mfsd5:ENSMUST00000051341.5	0.888	0.842105	0.84911	0.828729	0.849462	0.712751	0.745039	0.618257	0.837156	0.588813	0.781974	0.779923	0.78157
Frzb:ENSMUST00000028389.3	0.715138	0.871768	0.831968	0.788135	0.815798	0.837436	0.823781	0.815961	0.756819	0.802069	0.757817	0.610573	0.779011
Atf7:ENSMUST00000184616.7	0.555291	0.738806	0.701711	0.64256	0.6	0.71	0.732566	0.651731	0.778196	0.694922	0.832094	0.750681	0.818719
Ctdnep1:ENSMUST00000108593.7	0.602564	0.501377	0.523307	0.5	0.584337	0.564837	0.489667	0.44186	0.428776	0.433333	0.563881	0.407407	0.431221
Znrf2:ENSMUST00000079869.12	0.443915	0.440079	0.54109	0.347108	0.454262	0.321821	0.202423	0.314158	0.421732	0.377042	0.30474	0.682087	0.382156
Prorsd1:ENSMUST00000133103.1	0.378378	0.402556	0.448331	0.425926	0.503546	0.432927	0.422297	0.314607	0.497561	0.337104	0.468269	0.47263	0.548527
Btg2:ENSMUST00000020692.6	0.249837	0.507825	0.625934	0.549099	0.218985	0.445503	0.551282	0.39485	0.539468	0.31336	0.444337	0.674282	0.332329
Phlpp2:ENSMUST00000034175.4	0.573913	0.616601	0.565311	0.675	0.528926	0.564311	0.546163	0.534314	0.576988	0.619048	0.549505	0.643836	0.589844
Rplp2-ps1:ENSMUST00000238938.1	0.630952	0.611863	0.63936	0.627065	0.67113	0.576715	0.621185	0.39287	0.63207	0.417231	0.612849	0.617894	0.619328
Pnpla3:ENSMUST00000045289.5	0.405405	0.356436	0.502496	0.641026	0.424242	0.36194	0.444674	0.290909	0.433333	0.439216	0.514914	0.413793	0.511111
Cnep1r1:ENSMUST00000095214.9	0.661017	0.714744	0.733585	0.625	0.764228	0.723874	0.658692	0.654788	0.696872	0.610475	0.736289	0.728435	0.717457
Mapk6:ENSMUST00000168937.7	0.932432	0.875661	0.860808	0.842424	0.884848	0.814053	0.854634	0.694864	0.858904	0.680212	0.825615	0.80916	0.829554
Dkc1:ENSMUST00000033776.14	0.632184	0.769231	0.742457	0.728659	0.72619	0.734409	0.731707	0.563492	0.680723	0.61203	0.692913	0.694118	0.729904
Wdr89:ENSMUST00000062370.8	0.623372	0.60613	0.634507	0.622736	0.668534	0.572074	0.61719	0.383087	0.626657	0.409243	0.609239	0.61437	0.616096
Irf2bp2:ENSMUST00000054960.7	0.88	0.882	0.877974	0.759214	0.937063	0.884637	0.87863	0.663144	0.823799	0.575957	0.916695	0.799228	0.813814
Tdg:ENSMUST00000151390.7	0.948718	0.905444	0.912425	0.944936	0.95935	0.890659	0.891517	0.656371	0.929626	0.750542	0.927536	0.909091	0.916737
Bicral:ENSMUST00000040624.6	0.674419	0.638075	0.663798	0.628272	0.617284	0.601498	0.647224	0.377193	0.642276	0.417749	0.645288	0.664671	0.642593
Luc7l2:ENSMUST00000057692.10	0.65852	0.722319	0.697151	0.773087	0.60622	0.602475	0.702051	0.533886	0.693376	0.540161	0.673883	0.757669	0.714309
Ube2l6:ENSMUST00000102642.8	0	0.283333	0.360825	0.311321	0.388889	0.161111	0.247706	0.151703	0.341772	0.190724	0.223301	0.325806	0.31517
Fmnl1:ENSMUST00000107027.8	0	0.0208333	0.0414847	0.0420168	0	0.0325112	0.0830922	0	0.109489	0.0111111	0.0909091	0.0633803	0.0555556
Csnk2a2:ENSMUST00000212214.1	0.619652	0.617839	0.654907	0.617504	0.644875	0.619928	0.610819	0.558651	0.590447	0.544455	0.56146	0.599145	0.603392
Uba6:ENSMUST00000039373.13	0.61027	0.60288	0.579755	0.60354	0.616858	0.622269	0.582669	0.535463	0.551856	0.580705	0.599826	0.58021	0.569236
L1cam:ENSMUST00000114430.7	0.438202	0.361727	0.415004	0.403361	0.446512	0.32023	0.344582	0.175389	0.375887	0.194522	0.469027	0.228571	0.528302
Selenok:ENSMUST00000112268.2	0.567576	0.541049	0.561671	0.567972	0.564759	0.443939	0.529547	0.334017	0.443129	0.391054	0.548964	0.474217	0.379647
Agpat1:ENSMUST00000037489.14	0.803914	0.857262	0.847607	0.854296	0.844959	0.781779	0.846873	0.652916	0.874626	0.693762	0.857464	0.838263	0.835091
Sharpin:ENSMUST00000023211.15	0.580645	0.493617	0.580614	0.534375	0.722581	0.45303	0.536336	0.377193	0.590973	0.397892	0.55474	0.556701	0.544248
Esyt1:ENSMUST00000026427.7	0.233652	0.279175	0.219127	0.130039	0.163007	0.363526	0.226073	0.243062	0.0838028	0.120658	0.106217	0.0290939	0.141482
Akap1:ENSMUST00000107903.7	0.379562	0.371025	0.440771	0.39527	0.392405	0.320856	0.408024	0.12037	0.402397	0.241458	0.396011	0.416667	0.339928
Atxn2:ENSMUST00000051950.13	0.824034	0.800525	0.82345	0.831522	0.796774	0.766458	0.754699	0.488473	0.824797	0.567487	0.805614	0.821429	0.802428
Zmynd8:ENSMUST00000088113.10	0.523195	0.626215	0.651948	0.635588	0.548509	0.575594	0.591884	0.657183	0.655701	0.650987	0.649814	0.669393	0.647975
Lrfn4:ENSMUST00000113822.2	0.891089	0.87069	0.86917	0.837302	0.945946	0.747899	0.82004	0.612069	0.840596	0.695055	0.776398	0.7	0.79602
Pcdh1:ENSMUST00000160721.7	0.988095	0.887295	0.930267	0.911565	0.918605	0.87574	0.89508	0.643545	0.920078	0.673313	0.897793	0.9375	0.917301
Tradd:ENSMUST00000034359.9	0.338575	0.435021	0.450941	0.430597	0.352382	0.398528	0.424364	0.328135	0.414546	0.344549	0.367096	0.389567	0.373495
Wdr1:ENSMUST00000005234.12	0.911688	0.890882	0.903305	0.837806	0.882544	0.881281	0.886743	0.863933	0.850233	0.83494	0.787447	0.814462	0.834975
Wipi1:ENSMUST00000103060.9	0.485714	0.643836	0.618497	0.626667	0.697674	0.608355	0.59322	0.439597	0.655126	0.59293	0.601518	0.592105	0.704319
Tmsb15l:ENSMUST00000127404.7	0.78862	0.83349	0.743325	0.576603	0.742557	0.719594	0.637236	0.401818	0.7157	0.428323	0.69751	0.667532	0.66822
Gm14440:ENSMUST00000109051.7	0.70274	0.641564	0.56629	0.59867	0.513531	0.642033	0.65219	0.484128	0.676546	0.406343	0.543493	0.541584	0.733114
Eif4e2:ENSMUST00000113235.7	0.852371	0.843107	0.876139	0.834646	0.70174	0.825304	0.87743	0.872478	0.883048	0.840938	0.796129	0.780515	0.793365
Med19:ENSMUST00000102645.3	0.808261	0.681934	0.759864	0.781176	0.785348	0.757054	0.743339	0.504829	0.824722	0.665142	0.814497	0.813215	0.802
Hspa1b:ENSMUST00000172753.1	0.529497	0.564893	0.560604	0.628648	0.514595	0.577885	0.557893	0.363336	0.561095	0.27977	0.54993	0.462827	0.502931
Ctu2:ENSMUST00000116412.7	0.773196	0.728916	0.774671	0.747573	0.809524	0.727617	0.722274	0.415929	0.766067	0.586031	0.76176	0.731092	0.740741
Irf2:ENSMUST00000034041.8	0.883971	0.821376	0.814985	0.822112	0.720912	0.797075	0.790545	0.421101	0.808706	0.508562	0.830286	0.842619	0.797662
Crip1:ENSMUST00000200553.1	0.25	0.598039	0.692308	0.503876	0.5	0.606061	0.465517	0.299243	0.515414	0.290198	0.446309	0.559013	0.539478
Dph6:ENSMUST00000028640.13	0.89628	0.944343	0.975914	0.940743	0.964177	0.953569	0.95299	0.93946	0.961652	0.925312	0.912352	0.823948	0.920899
Pcgf1:ENSMUST00000165164.8	0.378378	0.252475	0.366097	0.284091	0.426357	0.219485	0.276182	0.0439739	0.381098	0.106818	0.268245	0.325301	0.320261
Mrpl18:ENSMUST00000079121.3	0.956495	0.939413	0.955497	0.954545	0.834445	0.949331	0.91198	0.526756	0.936766	0.645368	0.908264	0.918493	0.895431
Drg2:ENSMUST00000018568.3	0.977612	0.966667	0.96861	0.94235	0.957895	0.956026	0.959392	0.508571	0.961378	0.709278	0.962346	0.960938	0.952811
Mtif2:ENSMUST00000020749.12	0.408602	0.557604	0.573944	0.486772	0.434783	0.326613	0.458828	0.288288	0.5375	0.336391	0.52994	0.46988	0.520202
Alg5:ENSMUST00000044567.3	0.486667	0.424	0.574046	0.467116	0.45098	0.52151	0.387168	0.115385	0.358285	0.14985	0.256213	0.150579	0.185229
Rcn2:ENSMUST00000114276.2	0.386635	0.454325	0.439481	0.41945	0.453066	0.321991	0.397278	0.119212	0.273077	0.153282	0.33715	0.287157	0.256554
Tcea1:ENSMUST00000165720.2	0.891019	0.902079	0.905164	0.83953	0.885656	0.884886	0.903672	0.839647	0.871707	0.813168	0.816851	0.814261	0.820672
Zscan25:ENSMUST00000094116.4	0.458405	0.387235	0.408022	0.479515	0.49412	0.466547	0.452632	0.436257	0.476772	0.53521	0.645697	0.45118	0.531128
Galt:ENSMUST00000108038.1	0.485981	0.689888	0.736318	0.693277	0.790323	0.638684	0.710578	0.34589	0.728718	0.502865	0.683594	0.720588	0.709645
Pnpt1:ENSMUST00000020756.8	0.449462	0.624668	0.499854	0.408647	0.277309	0.279581	0.436641	0.0446707	0.288051	0.0866604	0.288176	0.254658	0.219898
Rpf2:ENSMUST00000045114.12	0.855422	0.834337	0.881731	0.904149	0.909524	0.871617	0.893293	0.397436	0.864301	0.517588	0.8332	0.834821	0.815166
Lars2:ENSMUST00000038863.8	0.491228	0.567797	0.714925	0.690722	0.294872	0.477578	0.668497	0.368	0.575758	0.523297	0.686767	0.623188	0.646667
Acot9:ENSMUST00000026324.9	0.382979	0.765517	0.643892	0.409692	0.302632	0.451327	0.622881	0.370492	0.584906	0.486163	0.54321	0.606742	0.520103
Snrpn:ENSMUST00000059305.16	0.992722	0.974327	0.889755	0.984243	0.991791	0.974632	0.894216	0.312577	0.957679	0.56576	0.941292	0.882143	0.899546
Gm12216:ENSMUST00000220191.1	0.5625	0.840708	0.821429	0.744186	0.814286	0.736842	0.681975	0.145923	0.870722	0.17626	0.985887	0.968878	0.934798
Gm5678:ENSMUST00000120115.2	0.3125	0.492063	0.574603	0.230769	0.652778	0.20059	0.261963	0.0493827	0.329749	0.179775	0.307143	0.324324	0.333333
Septin8:ENSMUST00000117061.7	0.486486	0.52459	0.277778	0.755396	0.0384615	0.601227	0.511737	0.939394	0.687437	0.850152	0.0307319	0.490323	0.785887
Tnc:ENSMUST00000030056.11	1	1	0.936688	0.880597	0.666667	0.809756	0.903061	0.716814	0.912351	0.632683	0.933333	1	0.846154
Sdc4:ENSMUST00000017153.3	0.453163	0.598293	0.56002	0.472015	0.413741	0.489786	0.434558	0.56895	0.676447	0.569665	0.656214	0.450815	0.583411
Sall1:ENSMUST00000034090.7	0	0.473684	0.651163	0.684874	0.75	0.55831	0.641509	NA	0.865559	0.822222	0.689992	0.807063	0.804444
Glrx2:ENSMUST00000129653.2	0.15099	0.157355	0.177414	0.101902	0.0662324	0.165434	0.128599	0.137029	0.262553	0.0772506	0.107169	0.0766667	0.066819
Myo6:ENSMUST00000035889.14	0.5625	0.414894	0.464052	0.365079	0.6	0.551587	0.474178	0.387597	0.631602	0.463479	0.468056	0.425532	0.604582
Timp2:ENSMUST00000017610.9	0.830819	0.873643	0.910625	0.852038	0.793617	0.849357	0.882379	0.838537	0.676369	0.681268	0.306914	0.163426	0.537775
Rassf2:ENSMUST00000028814.14	0.875	0.93617	0.846939	0.92973	0.8125	0.889292	0.843829	0.454545	0.922429	0.562279	0.89491	0.884615	0.921986
Axl:ENSMUST00000002677.10	0.75	0.875	0.923077	0.710526	1	0.864865	0.833333	0.725714	0.883705	0.737507	0.865854	0.822222	0.883622
Luzp2:ENSMUST00000082373.7	0.821653	0.818303	0.824775	0.819521	0.805709	0.811717	0.810972	0.86178	0.87411	0.860208	0.775395	0.767828	0.849244
Mapk1:ENSMUST00000069107.13	0.605313	0.639881	0.597136	0.486702	0.543651	0.553725	0.581798	0.473584	0.531403	0.33358	0.437298	0.286611	0.400616
Tmem38a:ENSMUST00000212763.1	0.834008	0.81997	0.852071	0.841996	0.738019	0.79933	0.828569	0.794712	0.848921	0.787215	0.679252	0.764706	0.82967
Slc48a1:ENSMUST00000117892.1	0.102941	0.0471175	0.037632	0.118565	0.0298507	0.0493977	0.0371272	0.109897	0.184909	0.219492	0.0406076	0.168317	0.220117
Nfkbia:ENSMUST00000021413.8	0.464	0.574163	0.607815	0.523126	0.454054	0.553985	0.612949	0.424679	0.520468	0.368692	0.468433	0.576897	0.454753
Ppp1cc:ENSMUST00000102528.10	0.910849	0.895072	0.899979	0.860362	0.874316	0.894071	0.901656	0.86537	0.89192	0.851501	0.799732	0.873223	0.845678
Pbxip1:ENSMUST00000038942.9	0.5	0.584	0.530516	0.454545	0.422222	0.552	0.613527	0.441176	0.559437	0.414187	0.5629	0.221366	0.469911
Hnrnpa1:ENSMUST00000036004.15	0.432346	0.375372	0.419739	0.319252	0.376538	0.382853	0.405151	0.341441	0.515507	0.394883	0.477681	0.414058	0.407037
Cfap36:ENSMUST00000020754.9	0.43649	0.848892	0.838611	0.743466	0.817043	0.844154	0.819268	0.30888	0.759303	0.457604	0.699615	0.630363	0.58383
Plpp3:ENSMUST00000064139.7	0.555458	0.75762	0.72847	0.467921	0.380264	0.584064	0.634673	0.727218	0.745548	0.602573	0.643188	0.630946	0.609154
Arl2bp:ENSMUST00000034228.15	0.975634	0.955665	0.970325	0.958333	0.950645	0.963908	0.971769	0.977162	0.96568	0.970278	0.7864	0.949698	0.939216
Gatm:ENSMUST00000028624.8	0.659616	0.742742	0.62787	0.861164	0.715541	0.722205	0.762477	0.706588	0.832537	0.880351	0.686086	0.897134	0.859453
Lpcat1:ENSMUST00000022099.14	0.885965	0.889205	0.894212	0.811159	0.792208	0.808008	0.831389	0.792727	0.928626	0.77305	0.898496	0.81448	0.833333
Gramd3:ENSMUST00000070166.5	0.407946	0.602839	0.569068	0.461628	0.599859	0.468363	0.574594	0.596098	0.636847	0.751581	0.538592	0.408278	0.558016
Ctnnd1:ENSMUST00000111696.7	0.296296	0.355401	0.407323	0.26875	0.321101	0.377877	0.29813	0.206642	0.212712	0.139642	0.0405893	0.125561	0.164373
Gm28635:ENSMUST00000189772.1	0.296296	0.355401	0.407323	0.26875	0.321101	0.377877	0.29813	0.206642	0.212712	0.139642	0.0405893	0.125561	0.164373
Plaat3:ENSMUST00000025925.10	0	0.375	0.242424	0.107143	0.0810811	0.232558	0.121387	NA	0.216795	0.0541632	0.116317	0.0408163	0.0323887
Chic2:ENSMUST00000075452.6	0.175396	0.125142	0.217914	0.111507	0.0930676	0.164123	0.119269	0.074913	0.249595	0.137394	0.130581	0.0961204	0.0701706
Hbegf:ENSMUST00000025363.6	0.521898	0.577889	0.631879	0.381944	0.432836	0.523107	0.488235	0.49635	0.597902	0.48697	0.490066	0.459941	0.48429
Sox2:ENSMUST00000099151.5	0.7	0.803042	0.843488	0.799238	0.625	0.743338	0.752965	0.806788	0.796342	0.74894	0.656499	0.665368	0.780802
Carhsp1:ENSMUST00000008537.9	0.661538	0.630573	0.592486	0.717765	0.514925	0.568584	0.544337	0.705765	0.711991	0.735793	0.589875	0.680912	0.635157
Dtna:ENSMUST00000220904.1	0.685535	0.66747	0.683703	0.691667	0.57554	0.636515	0.648297	0.517647	0.696765	0.501627	0.700828	0.647059	0.560976
Phactr3:ENSMUST00000108917.7	0.15371	0.107271	0.132922	0.181087	0.131488	0.112464	0.12964	0.0697888	0.198715	0.182143	0.0918097	0.111111	0.138298
Mboat2:ENSMUST00000221952.1	0.686067	0.688465	0.704012	0.506799	0.558057	0.599059	0.608681	0.581951	0.625522	0.426702	0.655634	0.53039	0.5731
Camk2b:ENSMUST00000109813.8	0.90625	0.949227	0.955512	0.89233	0.884987	0.915119	0.926018	0.871774	0.868349	0.755403	0.845579	0.845481	0.893967
Ptprd:ENSMUST00000107289.8	0.255475	0.43272	0.378714	0.363628	0.285156	0.410905	0.346739	0.565454	0.287542	0.37278	0.359149	0.401506	0.402398
Sys1:ENSMUST00000109352.7	0.0947503	0.0580225	0.0629036	0.0939716	0.07	0.0624246	0.0571898	0.167641	0.0784636	0.219141	0.18193	0.0884841	0.107701
Ogt:ENSMUST00000044475.4	0.925197	0.822835	0.853907	0.954918	0.874046	0.826024	0.892056	0.954967	0.80708	0.929362	0.917615	0.848	0.860429
Pabpn1:ENSMUST00000116476.8	0.61426	0.587303	0.594228	0.600006	0.476536	0.533864	0.552681	0.558915	0.544172	0.549835	0.654699	0.616649	0.611437
Peli1:ENSMUST00000093290.11	0.427313	0.463576	0.378378	0.343504	0.325444	0.37568	0.40003	0.371663	0.337506	0.363308	0.473719	0.27385	0.411244
Efemp2:ENSMUST00000166303.8	0.468085	0.228261	0.140762	0.0991736	0.162791	0.12749	0.143725	0.255	0.06035	0.186397	0.0925926	0.0809524	0.0409066
Atp6v1a:ENSMUST00000114666.8	0.669078	0.610578	0.636272	0.596741	0.546804	0.561116	0.571876	0.718853	0.546345	0.745668	0.675803	0.647658	0.634868
Gm20521:ENSMUST00000134077.1	0.458362	0.489801	0.469456	0.516026	0.35305	0.387363	0.422655	0.470352	0.393078	0.513315	0.553051	0.573394	0.560981
Gm6710:ENSMUST00000109011.7	0.846563	0.853209	0.841424	0.844651	0.842795	0.846445	0.840272	0.814356	0.844991	0.802498	0.833046	0.828188	0.830278
Clmn:ENSMUST00000109936.2	0.870547	0.858647	0.902314	0.842364	0.734365	0.84021	0.843315	0.847592	0.611751	0.720916	0.807432	0.810224	0.627015
Limch1:ENSMUST00000238785.1	0.28	0.287081	0.282908	0.33652	0.25	0.286131	0.315613	0.59542	0.270828	0.605466	0.380184	0.206897	0.418714
Rgma:ENSMUST00000119206.2	0.66055	0.739514	0.460335	0.494071	0.857868	0.422426	0.288313	0.975207	0.079415	0.751295	0.195009	0.884211	0.291667
Tcta:ENSMUST00000044725.8	0.189781	0.0994398	0.137383	0.087156	0.0869565	0.119766	0.122613	0.129338	0.0938578	0.30255	0.0488117	0.103627	0.109327
Ncoa1:ENSMUST00000085814.4	0.456522	0.428745	0.472858	0.488024	0.423313	0.419831	0.446599	0.578125	0.393673	0.560519	0.4173	0.419355	0.470283
Usp9x:ENSMUST00000089302.10	0.453351	0.421178	0.454277	0.433625	0.486883	0.480062	0.435608	0.510645	0.346029	0.419976	0.334442	0.32714	0.31857
Prima1:ENSMUST00000074416.9	NA	0.891497	0.811404	0.842105	0.214286	0.626263	0.756522	0.7125	0.607843	0.651125	0.501813	0.571429	0.5
Zfp91:ENSMUST00000038627.8	0.63562	0.611011	0.631117	0.527539	0.612262	0.571194	0.59754	0.679422	0.519783	0.646809	0.565615	0.540832	0.598448
Bptf:ENSMUST00000057892.14	0.246101	0.243042	0.251537	0.267567	0.243679	0.250966	0.228071	0.229635	0.214836	0.214196	0.23118	0.168827	0.207346
Serp1:ENSMUST00000029385.8	0.892	0.873171	0.932622	0.871287	0.83871	0.92294	0.935845	0.934713	0.864501	0.891011	0.719577	0.854025	0.74732
Mpv17:ENSMUST00000154241.7	0.750478	0.740429	0.769343	0.7355	0.758117	0.746859	0.767541	0.826378	0.765976	0.802784	0.740098	0.77748	0.764533
Ptprf:ENSMUST00000049074.12	0.492958	0.496947	0.525486	0.576142	0.556122	0.502503	0.536576	0.612512	0.557852	0.672849	0.549281	0.42	0.59366
Tmem230:ENSMUST00000110164.7	0.856115	0.728086	0.816246	0.825779	0.77221	0.740872	0.834775	0.755418	0.823651	0.877727	0.745757	0.902944	0.862434
Atp5c1:ENSMUST00000114896.7	0.498584	0.490227	0.502252	0.4997	0.500724	0.497461	0.494183	0.490481	0.597904	0.653634	0.511402	0.565375	0.523761
Tmem98:ENSMUST00000040865.8	1	0.222222	0.410256	0.363636	0.35	0.192308	0.386364	0.2	0.280389	0.251564	0.125529	0.371429	0.21843
Spcs2:ENSMUST00000036274.7	0.795107	0.808087	0.824979	0.840439	0.803371	0.80549	0.797012	0.80732	0.832101	0.862914	0.701958	0.813937	0.78068
Kif5b:ENSMUST00000025083.13	0.554988	0.607548	0.580405	0.523045	0.524389	0.548374	0.565431	0.653732	0.526867	0.641738	0.550644	0.509404	0.576271
Nfat5:ENSMUST00000169453.7	0.885246	0.901288	0.905237	0.908257	0.927835	0.88665	0.880374	0.969267	0.938178	0.976522	0.834583	0.945946	0.972079
Taf12:ENSMUST00000030731.10	0.209335	0.194693	0.195395	0.176945	0.191655	0.204138	0.195133	0.242057	0.166273	0.200882	0.168201	0.169386	0.182275
Fam168a:ENSMUST00000049053.8	0.810118	0.842021	0.853735	0.856318	0.850966	0.82704	0.824734	0.872957	0.817873	0.819102	0.832525	0.81457	0.846525
Ube2r2:ENSMUST00000040008.3	0.322148	0.324703	0.350867	0.401057	0.434185	0.336971	0.386466	0.45779	0.302697	0.446664	0.360706	0.302732	0.376346
Ramac:ENSMUST00000042166.10	0.863029	0.866227	0.877718	0.847371	0.873454	0.881853	0.875171	0.877574	0.800434	0.844481	0.718296	0.874171	0.820384
Apip:ENSMUST00000011055.6	0.292204	0.144253	0.197094	0.131356	0.217647	0.18436	0.173473	NA	0.0754721	0.155862	0.0412033	0.0539878	0.0629331
Nr2f1:ENSMUST00000091458.12	0.496689	0.634043	0.650677	0.599752	0.510769	0.502897	0.5815	0.802198	0.575511	0.67788	0.581756	0.521739	0.57984
Sri:ENSMUST00000088786.10	0.106327	0.225705	0.2189	0.091888	0.0993031	0.184966	0.132958	0.357032	0.117208	0.192508	0.0849038	0.0817499	0.111452
Map1lc3b:ENSMUST00000034270.16	0.867753	0.784499	0.845953	0.771887	0.82844	0.812176	0.793319	0.826101	0.779593	0.708558	0.821694	0.599945	0.614431
Spsb1:ENSMUST00000038562.8	0.857143	0.875	0.904255	0.833333	0.837838	0.910112	0.869514	0.831967	0.904924	0.810442	0.91609	0.878788	0.879747
Lbh:ENSMUST00000024857.13	0.846154	0.885914	0.899057	0.816456	0.768293	0.881678	0.69441	0.798535	0.853547	0.757699	0.868069	0.693215	0.827386
Clcn3:ENSMUST00000056508.11	0.828553	0.833285	0.856494	0.747656	0.783982	0.771903	0.776517	0.756736	0.758278	0.693686	0.814454	0.730637	0.732988
Mfap3l:ENSMUST00000160719.7	0.875167	0.786019	0.814043	0.775943	0.690016	0.802259	0.801196	0.762718	0.81796	0.693666	0.810358	0.609845	0.764916
Cdc42se1:ENSMUST00000053872.11	0.847417	0.912423	0.880858	0.580167	0.756147	0.849312	0.859335	0.786352	0.69636	0.565155	0.616229	0.538107	0.633156
Leprotl1:ENSMUST00000033910.8	0.741075	0.770018	0.835612	0.607878	0.66332	0.745508	0.740771	0.737676	0.530005	0.460508	0.514979	0.353242	0.358909
Pitpnb:ENSMUST00000086635.8	0.936807	0.90666	0.940401	0.878545	0.911995	0.930849	0.918379	0.90758	0.921984	0.84178	0.914274	0.854506	0.850128
Samhd1:ENSMUST00000109549.2	0.925287	0.958824	0.913366	0.917293	0.95082	0.935065	0.938292	0.925926	0.881356	0.876344	0.993783	0.601036	0.73617
Tmed4:ENSMUST00000004508.12	0.334282	0.250986	0.304599	0.359091	0.232164	0.279317	0.315562	0.309774	0.216529	0.197222	0.356124	0.171082	0.204426
Pla2g12a:ENSMUST00000029629.14	0.408602	0.506434	0.548795	0.576812	0.489028	0.475683	0.486434	0.527103	0.541761	0.484863	0.63578	0.510638	0.427151
Gna13:ENSMUST00000020930.13	0.853659	0.853125	0.817204	0.810945	0.75	0.722864	0.753811	0.799028	0.874351	0.763733	0.894511	0.826879	0.863869
Matr3:ENSMUST00000166793.9	0.960976	0.968992	0.969118	0.934162	0.959108	0.946108	0.962491	0.948942	0.849169	0.788266	0.93332	0.747807	0.713911
mt-Nd6:ENSMUST00000082419.1	0.259034	0.36285	0.275214	0.323301	0.320382	0.30058	0.274721	NA	0.310789	0.286596	0.358167	0.282009	0.317107
Vwa1:ENSMUST00000042196.3	0.853147	0.424837	0.269058	0.629213	0.40566	0.449612	0.352227	0.526882	0.202128	0.158595	0.374709	0.339623	0.0253097
Hs3st1:ENSMUST00000117944.1	0.0977995	0.129032	0.0843373	0.057508	0.0588235	0.0692943	0.0543921	0.150943	0.0717703	0.026009	0.152364	0.0555556	0.0386375
Clip3:ENSMUST00000014065.15	0.957088	0.983607	0.986442	0.918932	0.957535	0.985474	0.974473	0.954618	0.908008	0.77746	0.904814	0.9	0.77668
Ntrk2:ENSMUST00000109838.9	0.285279	0.41286	0.458706	0.189213	0.277727	0.358149	0.35259	0.675263	0.407807	0.283753	0.447945	0.35442	0.404888
Soga1:ENSMUST00000069098.6	0.963855	0.934555	0.943694	0.935252	0.963636	0.918325	0.883642	0.901679	0.843079	0.820332	0.961651	0.792277	0.853309
Arhgef2:ENSMUST00000176500.7	0.358111	0.315431	0.31471	0.284695	0.263694	0.309935	0.26763	0.30977	0.281312	0.303293	0.305183	0.245775	0.309832
Ddhd1:ENSMUST00000111828.3	0.248154	0.272973	0.26918	0.2346	0.229117	0.270504	0.255409	0.375026	0.121689	0.14338	0.277832	0.1487	0.145789
Stat3:ENSMUST00000103114.7	0.716667	0.684211	0.704312	0.618132	0.584615	0.687462	0.687386	0.671447	0.685825	0.569651	0.71592	0.394191	0.683089
Mtmr2:ENSMUST00000034396.13	0.479592	0.348123	0.367962	0.197309	0.311111	0.33908	0.28937	0.284585	0.254867	0.189555	0.329656	0.0983607	0.211957
Lpar1:ENSMUST00000107570.1	0.789474	0.733871	0.741477	0.625	0.584071	0.546392	0.640159	0.641847	0.690141	0.585759	0.721879	0.689655	0.591817
Atad1:ENSMUST00000235412.1	0.647984	0.537034	0.578605	0.638346	0.569293	0.591029	0.622504	0.485309	0.63637	0.616484	0.656109	0.595971	0.627426
Npc1:ENSMUST00000025279.5	0.575342	0.666667	0.625767	0.641975	0.635135	0.585106	0.594595	0.434211	0.720747	0.588381	0.730138	0.639535	0.631455
Epn2:ENSMUST00000108711.7	0.641935	0.654412	0.69621	0.58811	0.578947	0.681021	0.660507	0.620137	0.640078	0.502427	0.649226	0.593985	0.630919
Snx5:ENSMUST00000028909.4	0.476674	0.574045	0.516121	0.437469	0.541839	0.481319	0.55411	0.585221	0.661599	0.648327	0.7341	0.500777	0.464542
Sgce:ENSMUST00000133306.7	0.578947	0.638095	0.611961	0.664646	0.695122	0.584291	0.618196	0.680556	0.964502	0.824838	0.973508	0.985371	0.981295
Tril:ENSMUST00000127748.4	0.602594	0.771816	0.743022	0.705039	0.64092	0.689944	0.716308	0.588295	0.720598	0.573717	0.730008	0.684741	0.702314
Csnk1d:ENSMUST00000070575.13	0.944262	0.951906	0.956387	0.88826	0.876623	0.94821	0.940326	0.89857	0.848687	0.698696	0.846567	0.531073	0.790565
Adipor2:ENSMUST00000032272.12	0.75	0.868597	0.892766	0.720588	0.721154	0.804539	0.836259	0.785965	0.870704	0.692308	0.83526	0.684746	0.782043
Aopep:ENSMUST00000091560.10	0.786213	0.787903	0.768797	0.705686	0.714145	0.728883	0.724698	0.472864	0.783197	0.632815	0.782002	0.743764	0.796448
Zfp24:ENSMUST00000066497.11	0.433779	0.394564	0.425738	0.382487	0.272453	0.31591	0.345661	0.402578	0.524562	0.442604	0.589858	0.392523	0.41758
Chpt1:ENSMUST00000117440.7	0.543334	0.533561	0.536317	0.500334	0.516448	0.501816	0.504348	0.385867	0.480644	0.343928	0.488492	0.3148	0.324799
Sptlc2:ENSMUST00000021424.4	0.264647	0.647664	0.696245	0.303466	0.293231	0.473385	0.470526	0.537038	0.145891	0.187107	0.376187	0.0859219	0.240437
Slc35a2:ENSMUST00000115660.11	0.325	0.313665	0.307576	0.42246	0.552	0.385429	0.352241	0.313131	0.74712	0.631003	0.811374	0.39777	0.530691
Lrrc8d:ENSMUST00000060531.15	0.677966	0.446602	0.47878	0.469055	0.43038	0.475762	0.419312	0.569921	0.477823	0.498414	0.694272	0.516854	0.473573
Snu13:ENSMUST00000080622.8	0.804104	0.869475	0.874627	0.767451	0.846874	0.841898	0.796385	0.807931	0.752257	0.618944	0.805041	0.586396	0.601066
Pcyox1:ENSMUST00000032065.14	0.923567	0.849866	0.915192	0.812646	0.908602	0.892572	0.912476	0.754286	0.838651	0.704702	0.924505	0.683077	0.560084
Ebp:ENSMUST00000033509.14	0.0688191	0.0857732	0.0860444	0.0659902	0.0797449	0.072238	0.0670654	0.0733211	0.0979761	0.0657548	0.271784	0.0665932	0.0781637
Cilk1:ENSMUST00000044551.7	0.504265	0.782237	0.700339	0.505328	0.690519	0.669045	0.653336	0.673788	0.509232	0.404365	0.688074	0.266803	0.418784
Smarca5:ENSMUST00000043359.8	0.785185	0.766667	0.759865	0.54798	0.726415	0.785714	0.737288	0.559271	0.56736	0.543046	0.891856	0.542017	0.546284
Tmem41b:ENSMUST00000094097.11	0.547587	0.437628	0.498165	0.29166	0.37736	0.420974	0.505661	0.292094	0.346112	0.183815	0.341546	0.174167	0.260172
Cdkn1c:ENSMUST00000167912.8	0.819023	0.697072	0.762424	0.743396	0.728367	0.684708	0.736216	0.796583	0.76281	0.517129	0.738818	0.730627	0.727127
Lamc1:ENSMUST00000027752.14	0.933333	0.727273	0.848649	0.738095	0.555556	0.576687	0.685393	0.384977	0.756318	0.48547	0.743759	0.785714	0.751205
Limd1:ENSMUST00000026269.3	0.5	0.353846	0.441773	0.470784	0.181818	0.404867	0.367263	0.415297	0.438342	0.407294	0.537449	0.470686	0.491365
Atp6v0a2:ENSMUST00000037865.12	0.649109	0.682784	0.694565	0.496013	0.580118	0.640629	0.67388	0.56903	0.678409	0.473292	0.681317	0.356748	0.616305
Actr3:ENSMUST00000027579.16	0.775463	0.773387	0.752774	0.801629	0.77551	0.782438	0.822338	0.774914	0.817954	0.795979	0.702679	0.75664	0.771874
Fam171a1:ENSMUST00000091505.10	0.937888	0.959306	0.947492	0.938425	0.88567	0.935145	0.94139	0.939907	0.93257	0.928724	0.919155	0.833246	0.934097
Trabd:ENSMUST00000169891.7	0.906556	0.805074	0.856992	0.868551	0.833734	0.845383	0.862009	0.832598	0.877175	0.829655	0.74131	0.861239	0.863165
Zdhhc2:ENSMUST00000049389.10	0.953488	0.96633	0.95302	0.945055	0.922414	0.946372	0.947041	0.947867	0.934354	0.922063	0.811039	0.867925	0.848485
Pole4:ENSMUST00000095786.5	0.565335	0.504401	0.559624	0.55452	0.60465	0.562006	0.583043	0.498134	0.518693	0.50396	0.403283	0.406637	0.363332
Arhgap1:ENSMUST00000111329.7	0.918919	0.871595	0.898884	0.908163	0.834437	0.869929	0.879543	0.909348	0.937301	0.956193	0.831477	0.948617	0.96849
Ncbp2:ENSMUST00000023460.6	0.711968	0.730498	0.73025	0.708813	0.669622	0.70453	0.710121	0.751123	0.708941	0.699904	0.573531	0.60844	0.6814
H4c8:ENSMUST00000102972.5	0.0769231	0.237288	0.18254	0.0571429	0.268293	0.103448	0.227468	0.5	0.0447336	0.415326	0.0293946	0.0491803	0.190476
Mbnl1:ENSMUST00000099087.7	0.47619	0.466967	0.526012	0.463636	0.552036	0.460356	0.536765	0.682128	0.509728	0.673	0.490244	0.502344	0.575563
Gabbr1:ENSMUST00000025338.15	0.270225	0.230858	0.228874	0.280525	0.281006	0.228262	0.232859	0.281952	0.349884	0.433383	0.232952	0.308951	0.345418
Vcl:ENSMUST00000022369.8	1	0.943396	0.926087	1	0.95	0.948718	0.903361	0.992248	0.97549	0.99751	0.852267	0.96875	0.995765
Capzb:ENSMUST00000102507.9	0.829787	0.85661	0.843288	0.766087	0.799631	0.83943	0.874129	0.77861	0.716636	0.691019	0.55238	0.681602	0.758073
Slc27a1:ENSMUST00000034267.4	0.361702	0.367876	0.35814	0.387097	0.391892	0.36983	0.367559	0.355	0.387544	0.341098	0.2062	0.219178	0.330595
Lyl1:ENSMUST00000238562.1	0.898106	0.614306	0.838585	0.913628	0.91241	0.904493	0.917948	0.88317	0.900304	0.8845	0.901561	0.0319531	0.15828
Col1a2:ENSMUST00000031668.9	0.38125	0.33375	0.131402	0.410385	0.3335	0.270119	0.238304	0.5475	0.255448	0.530062	0.236302	0.133464	0.221363
Kdelr2:ENSMUST00000110731.3	0.724138	0.898678	0.938272	0.604651	0.736842	0.865145	0.830906	0.887833	0.847111	0.797512	0.569798	0.431325	0.486864
Jam2:ENSMUST00000114195.7	0.43346	0.643223	0.746903	0.594326	0.582386	0.767756	0.571238	0.666824	0.653808	0.501254	0.615842	0.190848	0.333801
Stt3a:ENSMUST00000120381.8	0.671417	0.509089	0.568029	0.352633	0.487638	0.562754	0.516686	0.397324	0.308122	0.131731	0.476663	0.0674173	0.0537179
Map4k4:ENSMUST00000168431.6	0.798547	0.75186	0.773559	0.767045	0.697949	0.757526	0.746719	0.765027	0.734476	0.749946	0.769182	0.653625	0.534937
Rab2a:ENSMUST00000060232.7	0.87055	0.91765	0.925605	0.833548	0.876479	0.893902	0.885374	0.882921	0.789454	0.66617	0.757201	0.486141	0.540963
Tor1aip1:ENSMUST00000169241.7	0.708542	0.810603	0.796964	0.585663	0.600602	0.727754	0.733942	0.663747	0.68709	0.659739	0.734057	0.437308	0.534513
Tspan6:ENSMUST00000087557.11	0.504256	0.538651	0.615609	0.527124	0.524341	0.517511	0.573391	0.586369	0.70946	0.628843	0.689416	0.513476	0.510009
Alg14:ENSMUST00000039442.11	0.158889	0.183667	0.177807	0.117552	0.133828	0.136242	0.13079	0.247159	0.213691	0.267394	0.279773	0.172902	0.169689
Usp2:ENSMUST00000034508.13	0.346713	0.491476	0.523609	0.370045	0.312656	0.430983	0.494604	0.376113	0.464312	0.401339	0.516474	0.254701	0.3472
Tmem9b:ENSMUST00000033333.12	0.863636	0.914189	0.917053	0.872599	0.917255	0.914078	0.903411	0.881876	0.813072	0.78534	0.860622	0.701791	0.687026
Lamp2:ENSMUST00000061755.8	0.869565	1	0.983607	0.92	1	0.953307	0.958606	0.982533	0.980036	0.968956	0.939742	0.743388	0.91129
Slc29a3:ENSMUST00000119595.7	1	0.970149	0.95302	0.925926	0.846154	0.977273	0.925831	0.786885	0.954823	0.87146	0.955042	0.781142	0.882562
Smarcc2:ENSMUST00000026433.8	0.937097	0.897131	0.92835	0.906526	0.899598	0.902076	0.876922	0.865613	0.935843	0.894358	0.948625	0.801471	0.780921
Map4:ENSMUST00000035055.14	0.856563	0.835561	0.848426	0.808346	0.801802	0.848341	0.83437	0.8327	0.698851	0.650981	0.580942	0.592486	0.484536
Sccpdh:ENSMUST00000040538.9	0.834483	0.8516	0.841187	0.767764	0.806283	0.816084	0.874802	0.822446	0.820138	0.757151	0.844447	0.746324	0.680328
Nrarp:ENSMUST00000104999.3	0.535638	0.686247	0.737101	0.667231	0.62995	0.725439	0.663558	0.681559	0.776064	0.806067	0.658958	0.645395	0.635215
Gpr146:ENSMUST00000051293.7	0.714403	0.784165	0.759582	0.689278	0.533552	0.667921	0.73466	0.721791	0.797901	0.695857	0.762036	0.449382	0.675635
Cbfb:ENSMUST00000109392.8	0.972222	0.957333	0.93266	0.914485	0.910714	0.950851	0.941639	0.952968	0.915973	0.891737	0.935496	0.79471	0.763918
Chtop:ENSMUST00000107343.7	0.908766	0.923997	0.950259	0.867606	0.93126	0.933788	0.942871	0.907534	0.839613	0.812548	0.872719	0.743777	0.71494
Riok3:ENSMUST00000025270.7	0.585745	0.599254	0.595694	0.596249	0.57749	0.602063	0.59407	0.580677	0.571447	0.527806	0.538088	0.454619	0.464765
Zmpste24:ENSMUST00000058754.8	0.977778	0.964789	0.959677	0.764706	0.868421	0.916961	0.921612	0.9375	0.97598	0.883024	0.949162	0.768657	0.827551
Pip4p2:ENSMUST00000029875.3	0.984962	0.9712	0.967364	0.901515	0.964981	0.956908	0.948292	0.955022	0.931579	0.896497	0.89426	0.803333	0.775124
Plxdc2:ENSMUST00000028081.12	0.602388	0.590021	0.590545	0.529145	0.514356	0.587979	0.605895	0.471421	0.379315	0.378685	0.430969	0.219877	0.322881
Hdlbp:ENSMUST00000170883.7	0.762136	0.727564	0.729944	0.688482	0.654167	0.772313	0.681675	0.783203	0.598162	0.568504	0.603901	0.344689	0.492194
Cs:ENSMUST00000005826.8	0.9525	0.942016	0.951946	0.857724	0.909333	0.938046	0.938	0.915946	0.912289	0.851834	0.884781	0.739884	0.778593
Lrrc8c:ENSMUST00000067924.12	1	0.922727	0.879518	0.825397	0.774194	0.873418	0.783654	0.905233	0.847724	0.739061	0.85317	0.65	0.683951
Sar1a:ENSMUST00000020285.9	0.940367	0.973301	0.970114	0.865837	0.925676	0.945017	0.954487	0.952179	0.907631	0.891595	0.844409	0.828708	0.753142
Strap:ENSMUST00000064910.6	0.412801	0.524252	0.504801	0.408509	0.399351	0.477174	0.483745	0.422775	0.371848	0.362545	0.334598	0.283476	0.241923
Rnf138:ENSMUST00000052396.6	0.590195	0.519133	0.639889	0.582724	0.501298	0.584476	0.617312	0.500687	0.610702	0.599968	0.523413	0.514459	0.435095
Bet1:ENSMUST00000049166.4	0.761628	0.712454	0.793704	0.733209	0.802575	0.779119	0.830956	0.812362	0.870885	0.802749	0.822947	0.787651	0.710541
Tns1:ENSMUST00000169786.7	0.754495	0.850301	0.834953	0.744737	0.953968	0.782481	0.665172	0.776543	0.735984	0.658029	0.68623	0.78513	0.806326
Tnpo3:ENSMUST00000115251.7	0.695489	0.73506	0.739827	0.665845	0.694737	0.699686	0.705948	0.692473	0.689692	0.693303	0.700192	0.90424	0.730853
Tspan15:ENSMUST00000047883.10	0.44898	0.26	0.292135	0.134328	0.0533333	0.346939	0.356061	0.220165	0.12497	0.125498	0.0900866	0.121951	0.233511
Psme2b:ENSMUST00000104958.1	0.0146684	0.0132071	0.01298	0.0035661	0.00848164	0.00302301	0.0156588	0.00687695	0.0126452	0.0135796	0.00591265	0.39637	0.334584
Zeb2:ENSMUST00000176438.8	0.49404	0.427483	0.480877	0.454634	0.412684	0.401592	0.467149	0.376577	0.414688	0.426116	0.463252	0.409057	0.420518
Canx:ENSMUST00000179865.7	0.836389	0.838775	0.825384	0.800094	0.805713	0.830884	0.831571	0.835203	0.771485	0.777407	0.773426	0.667129	0.743371
Rsrc2:ENSMUST00000050827.13	0.27686	0.38	0.341512	0.277674	0.257683	0.322119	0.345404	0.275177	0.285867	0.249915	0.355096	0.18802	0.233277
Tcf25:ENSMUST00000211932.1	0.835232	0.85183	0.855148	0.816284	0.828932	0.846258	0.8246	0.795143	0.691835	0.618469	0.668096	0.55628	0.650882
Lrpap1:ENSMUST00000030986.14	0.338255	0.336696	0.335677	0.284781	0.255172	0.241103	0.298522	0.387244	0.327498	0.260797	0.205499	0.144266	0.212571
Jak1:ENSMUST00000102781.9	0.715736	0.787368	0.744386	0.674888	0.773842	0.775554	0.728376	0.748318	0.661792	0.671033	0.699884	0.5574	0.665667
Abhd6:ENSMUST00000166497.8	0.205701	0.228137	0.26179	0.240463	0.194217	0.243438	0.252236	0.268236	0.163698	0.174987	0.135918	0.0588541	0.138407
Zfand5:ENSMUST00000237651.1	0.875203	0.91973	0.904974	0.879512	0.831814	0.891689	0.9022	0.79491	0.824007	0.729225	0.782492	0.610948	0.722007
Rasgrp3:ENSMUST00000164192.8	0.414188	0.398353	0.391268	0.407961	0.47457	0.401072	0.333783	NA	0.349244	0.478546	0.3799	0.329843	0.395562
Slc6a6:ENSMUST00000032185.8	0.57602	0.596956	0.627767	0.548689	0.515656	0.582488	0.56635	0.712019	0.620107	0.709248	0.645163	0.459865	0.647368
Sparc:ENSMUST00000108858.7	0.744275	0.809524	0.807306	0.751269	0.805243	0.684337	0.717036	0.826282	0.802584	0.726849	0.762279	0.530124	0.697576
Slc31a1:ENSMUST00000122092.1	0.571429	0.536122	0.595465	0.4	0.214286	0.412222	0.418678	0.63	0.497194	0.410995	0.528393	0.190625	0.370934
Vsir:ENSMUST00000020301.13	0.619479	0.610625	0.565414	0.5	0.589609	0.190563	0.321156	NA	0.532492	0.360769	0.486543	0.264729	0.631809
Ube4a:ENSMUST00000117506.8	0.778689	0.914634	0.863562	0.729927	0.863158	0.887566	0.799535	0.92	0.827939	0.850985	0.721117	0.782609	0.892704
Lin7c:ENSMUST00000028583.7	0.93783	0.93761	0.947356	0.899313	0.825741	0.94397	0.958302	0.939172	0.860059	0.797842	0.836709	0.696284	0.716375
Klf2:ENSMUST00000067912.7	0.285714	0.176471	0.117925	0.0666667	0.275	0.116788	0.0925926	0.3829	0.0971357	0.4027	0.1	0.116066	0.165887
Elovl7:ENSMUST00000022207.9	0.775059	0.602112	0.595336	0.622305	0.348002	0.512261	0.475387	0.529935	0.570209	0.551641	0.553644	0.521818	0.440084
Mff:ENSMUST00000162003.7	0.929708	0.965316	0.971764	0.934797	0.967463	0.95232	0.962834	0.954253	0.943123	0.912251	0.928794	0.886703	0.821505
Mal:ENSMUST00000028854.14	0.765957	0.855422	0.887701	0.78	0.710267	0.786517	0.786713	0.704545	0.8125	0.711989	0.803301	0.800813	0.694863
Tax1bp1:ENSMUST00000080723.10	0.253676	0.246784	0.23561	0.235405	0.221311	0.265038	0.230128	0.276292	0.381096	0.333605	0.421747	0.342967	0.273204
Rer1:ENSMUST00000030914.3	0.505351	0.515399	0.435541	0.439132	0.413982	0.495079	0.473892	0.486818	0.443112	0.476721	0.437094	0.436001	0.333083
Fech:ENSMUST00000235766.1	0.524272	0.508772	0.46616	0.544503	0.506098	0.458918	0.502232	0.623116	0.531822	0.522433	0.588968	0.398477	0.443223
Cdc42:ENSMUST00000051477.12	0.915858	0.87755	0.918035	0.836818	0.823231	0.886941	0.89898	0.852812	0.872429	0.828787	0.846735	0.798574	0.721833
Klhl2:ENSMUST00000210166.1	0.941176	0.872852	0.874672	0.928854	0.839286	0.85792	0.93717	0.9375	0.822323	0.88535	0.888619	0.861111	0.760373
Ppp4r2:ENSMUST00000063854.6	0.660615	0.700756	0.728309	0.548	0.654715	0.721489	0.674848	0.40296	0.516044	0.272033	0.408939	0.326108	0.354601
Srp72:ENSMUST00000101087.9	0.675576	0.788488	0.696887	0.564015	0.623703	0.77114	0.753647	0.450939	0.676173	0.550271	0.576377	0.595366	0.598138
Crebbp:ENSMUST00000023165.8	0.568421	0.518908	0.588207	0.490515	0.601562	0.609882	0.593122	0.38992	0.42559	0.231631	0.343011	0.320442	0.381932
Rock2:ENSMUST00000020904.7	0.795151	0.702735	0.744836	0.728273	0.769856	0.736158	0.772056	0.547205	0.746451	0.591613	0.667914	0.631285	0.676871
Pcnx:ENSMUST00000021567.5	0.712349	0.810481	0.843577	0.654367	0.817815	0.820081	0.81556	0.602604	0.626026	0.395113	0.34567	0.421941	0.417748
Cyld:ENSMUST00000043526.14	0.568375	0.717062	0.666264	0.615283	0.676387	0.650509	0.685029	0.500077	0.583151	0.433754	0.512202	0.319257	0.450252
Plbd2:ENSMUST00000031597.6	0.760262	0.537506	0.677603	0.514946	0.458355	0.582772	0.715611	0.454032	0.361241	0.251264	0.281054	0.112771	0.32784
Nipa1:ENSMUST00000052204.5	0.333333	0.230032	0.30701	0.222222	0.293478	0.302193	0.248469	0.140704	0.136326	0.09062	0.0848792	0.0967742	0.196507
[truncated: 186 more rows]
