# Supplementary material for: Infernape uncovers cell type–specific and spatially resolved alternative polyadenylation in the brain
Source: HighWire-hosted journal article supplement (doi:10.1101/gr.277864.123), 2023-10-01
Supplement: Supplemental_Tables.zip [file Supplemental_Table_S17.xlsx]

## Sheet: warm.per.ctype.sig.utr.TEGLU
WARM values for each selected TEGLU cluster (Fig.7A)
	TEGLU10	TEGLU11	TEGLU17	TEGLU18	TEGLU3	TEGLU4	TEGLU6	TEGLU7	TEGLU8
Ak4:ENSMUST00000102780.7	0.704663	0.566102	0.5	0.596491	0.582645	0.788462	0.533333	0.314563	0.467153
Wdfy1:ENSMUST00000113512.7	0.715126	0.549438	0.597445	0.493662	0.597945	0.745464	0.600112	0.409714	0.464535
Kalrn:ENSMUST00000114973.8	0.818868	0.597458	0.583333	0.540984	0.716667	0.796117	0.868421	0.368932	0.617216
Sec22b:ENSMUST00000029476.8	0.627178	0.48062	0.562842	0.412587	0.460653	0.606218	0.467532	0.329723	0.457967
Sod2:ENSMUST00000007012.5	0.366491	0.257486	0.315011	0.325666	0.23681	0.432014	0.278383	0.138435	0.221386
Uck2:ENSMUST00000053686.8	0.673077	0.50303	0.642857	0.5	0.535714	0.632911	0.487179	0.40836	0.459459
Mblac2:ENSMUST00000057598.6	0.54185	0.394687	0.554167	0.428571	0.369565	0.540856	0.425532	0.248354	0.353687
Stum:ENSMUST00000136521.1	0.796672	0.671051	0.681763	0.556088	0.419194	0.60797	0.470408	0.482934	0.56175
Tigar:ENSMUST00000039913.8	0.837324	0.704068	0.760769	0.774691	0.795008	0.842686	0.848762	0.385925	0.555318
Ptrh2:ENSMUST00000108022.7	0.293233	0.112299	0.168831	0.0886076	0.140562	0.168831	0.3125	0.0800915	0.12381
Ttl:ENSMUST00000035812.13	0.682589	0.532452	0.574534	0.5875	0.503834	0.738372	0.530435	0.400924	0.5304
Cbr4:ENSMUST00000034058.13	0.319149	0.141791	0.210526	0.233333	0.156098	0.272727	0.2	0.0883281	0.135593
Cnot11:ENSMUST00000161515.7	0.737609	0.627757	0.659454	0.636451	0.58975	0.728759	0.625	0.439001	0.565188
Trappc5:ENSMUST00000044857.3	0.571429	0.42029	0.560606	0.427778	0.419103	0.540541	0.425532	0.303468	0.384733
Emc8:ENSMUST00000181950.1	0.432099	0.312883	0.427586	0.310345	0.293737	0.405594	0.328767	0.167192	0.243802
Nudt5:ENSMUST00000026927.9	0.280992	0.125	0.175676	0.169231	0.134615	0.307692	0.190476	0.0578035	0.129545
Lancl1:ENSMUST00000027149.11	0.420345	0.267339	0.459302	0.307463	0.265625	0.412987	0.420561	0.185309	0.228512
2610002M06Rik:ENSMUST00000120722.1	0.73998	0.593516	0.670326	0.63831	0.589523	0.686257	0.660668	0.438529	0.539665
Eif1ax:ENSMUST00000087143.6	0.587824	0.406646	0.553212	0.516031	0.436951	0.692308	0.521053	0.331359	0.391978
Bdh1:ENSMUST00000115227.9	0.581583	0.428827	0.507241	0.467741	0.446746	0.496053	0.457715	0.309442	0.400258
Eapp:ENSMUST00000161592.7	0.559809	0.453453	0.497143	0.5625	0.389952	0.646018	0.464789	0.313002	0.381443
Nop9:ENSMUST00000019441.8	0.213333	0.0520833	0.105263	0.1	0.0873016	0.135135	0	0.0462963	0.05
C130074G19Rik:ENSMUST00000048308.5	0.880342	0.810547	0.939394	0.866667	0.7	0.8	0.764706	0.635974	0.708804
Ptrhd1:ENSMUST00000179139.2	0.487448	0.336399	0.441441	0.446281	0.455611	0.418301	0.409722	0.207871	0.327857
Spring1:ENSMUST00000049138.7	0.334425	0.235851	0.284927	0.25601	0.18815	0.30609	0.209981	0.162019	0.137958
Thoc3:ENSMUST00000026990.5	0.398876	0.25261	0.352941	0.295699	0.245	0.315	0.288462	0.207243	0.261622
Tpm1:ENSMUST00000113690.7	0.566931	0.478981	0.501491	0.540628	0.519287	0.601878	0.569671	0.365866	0.441618
Arf6:ENSMUST00000050063.8	0.538217	0.491686	0.502793	0.5	0.485477	0.564417	0.357895	0.274684	0.339004
Mpp3:ENSMUST00000100400.8	0.661721	0.558739	0.452381	0.426136	0.652921	0.666667	0.795181	0.40751	0.510402
Ubxn2b:ENSMUST00000029907.5	0.819209	0.721739	0.760684	0.745098	0.743169	0.825503	0.75	0.51816	0.650754
Dcun1d1:ENSMUST00000178098.7	0.417556	0.33245	0.366892	0.379543	0.34823	0.443793	0.302081	0.255918	0.316231
0610030E20Rik:ENSMUST00000077783.4	0.401408	0.311688	0.333333	0.303371	0.24375	0.418605	0.275362	0.200441	0.247265
Rab11a:ENSMUST00000169058.7	0.680435	0.517802	0.634442	0.58936	0.560004	0.723044	0.455938	0.468247	0.531859
Vamp4:ENSMUST00000135241.7	0.366987	0.278793	0.348786	0.311355	0.256551	0.451389	0.315018	0.15275	0.175395
Ddah1:ENSMUST00000029845.14	0.528629	0.401695	0.445513	0.447196	0.383686	0.525661	0.330034	0.27326	0.381293
Tmed5:ENSMUST00000119437.7	0.480632	0.384254	0.46949	0.374016	0.375399	0.439725	0.288033	0.275248	0.311934
Bnip3l:ENSMUST00000111115.7	0.38374	0.286405	0.309554	0.271141	0.280225	0.409982	0.235955	0.165559	0.241822
Crtac1:ENSMUST00000048630.7	0.517241	0.38961	0.413442	0.387809	0.405738	0.415584	0.432624	0.335106	0.336735
Cd3eap:ENSMUST00000047036.9	0.403387	0.274385	0.384112	0.347851	0.318503	0.370341	0.183502	0.294721	0.310969
Ube2l3:ENSMUST00000232139.1	0.550363	0.439079	0.457304	0.460463	0.463987	0.535823	0.51358	0.3093	0.419447
Ero1a:ENSMUST00000022378.8	0.889342	0.767174	0.902846	0.729188	0.768573	0.798541	0.525937	0.674157	0.781651
Fbxo45:ENSMUST00000042732.5	0.60151	0.510411	0.45435	0.461905	0.458124	0.490438	0.397394	0.392361	0.430786
Dcaf12:ENSMUST00000030145.8	0.72308	0.559488	0.639142	0.630875	0.583019	0.71125	0.598984	0.503388	0.588404
Sap30bp:ENSMUST00000140991.1	0.51073	0.371308	0.490066	0.470588	0.373178	0.630252	0.472727	0.272152	0.388215
Stxbp6:ENSMUST00000053768.13	0.767306	0.568755	0.710436	0.81165	0.791195	0.767257	0.637795	0.553608	0.578511
AI854703:ENSMUST00000154570.1	0.538922	0.375887	0.477876	0.326733	0.450704	0.546218	0.513514	0.330739	0.376884
Idh3a:ENSMUST00000217484.1	0.4875	0.376976	0.5	0.432056	0.387857	0.537662	0.450928	0.270305	0.317939
Ccdc127:ENSMUST00000022063.13	0.338753	0.275024	0.381698	0.289948	0.293426	0.385335	0.271391	0.191997	0.225881
Meaf6:ENSMUST00000154689.7	0.461659	0.318132	0.417559	0.443864	0.327717	0.465116	0.291005	0.278581	0.313183
Dusp19:ENSMUST00000028384.4	0.55506	0.435733	0.4557	0.367778	0.413361	0.585973	0.427899	0.344948	0.449875
Ide:ENSMUST00000131070.1	0.585635	0.408257	0.5	0.514019	0.47651	0.46281	0.537037	0.408333	0.477401
Gid8:ENSMUST00000029090.8	0.384193	0.306198	0.329522	0.213309	0.254907	0.396032	0.368564	0.207318	0.225183
Gng4:ENSMUST00000021734.8	0.888889	0.817021	0.830239	0.844828	0.765714	0.911111	0.805556	0.607629	0.739709
Sp4:ENSMUST00000026367.10	0.651975	0.550231	0.568892	0.627983	0.57773	0.554688	0.536085	0.542537	0.583692
Sap30l:ENSMUST00000020826.5	0.474453	0.397436	0.424	0.380952	0.4075	0.45	0.605263	0.233813	0.248062
Flad1:ENSMUST00000129308.8	0.228766	0.150813	0.223996	0.164302	0.150356	0.213939	0.238839	0.127338	0.141452
Fbxo31:ENSMUST00000059018.13	0.41255	0.339982	0.387528	0.350835	0.348968	0.502712	0.340081	0.191097	0.225344
Oscp1:ENSMUST00000035497.4	0.363264	0.302864	0.411609	0.327633	0.305505	0.443096	0.347137	0.226133	0.302329
Wdr37:ENSMUST00000054251.12	0.775184	0.690919	0.650039	0.739779	0.688677	0.730975	0.812691	0.428915	0.604708
Gng2:ENSMUST00000160013.7	0.672232	0.571766	0.650747	0.607038	0.557175	0.652636	0.628967	0.470609	0.549419
Srp9:ENSMUST00000027792.5	0.355812	0.252842	0.245399	0.279245	0.241594	0.386545	0.27907	0.181672	0.234957
Phf24:ENSMUST00000107975.7	0.76298	0.710366	0.686083	0.649178	0.671201	0.703455	0.60254	0.605422	0.645245
Ttc9:ENSMUST00000218362.1	0.662384	0.560348	0.583919	0.665288	0.561055	0.707988	0.636422	0.47928	0.558255
Ado:ENSMUST00000075686.6	0.737178	0.678597	0.670402	0.742914	0.67126	0.743043	0.644312	0.472442	0.61192
Mul1:ENSMUST00000044058.10	0.407692	0.274869	0.444444	0.345946	0.353881	0.441176	0.392857	0.1925	0.252525
Actr1b:ENSMUST00000043951.9	0.628876	0.541767	0.550416	0.531863	0.543493	0.60989	0.493789	0.413836	0.515935
Klf6:ENSMUST00000000080.7	0.313653	0.22008	0.303534	0.272109	0.204691	0.316832	0.212766	0.136195	0.165386
Sugt1:ENSMUST00000054908.9	0.252584	0.210894	0.274719	0.321805	0.183653	0.307753	0.215731	0.182308	0.211857
Ncald:ENSMUST00000168992.7	0.667585	0.561206	0.635793	0.597295	0.578316	0.65	0.49866	0.410878	0.540946
Adra1d:ENSMUST00000103184.3	0.254151	0.170536	0.195269	0.0830237	0.177049	0.15326	0.205379	0.120408	0.148133
Exoc7:ENSMUST00000106411.9	0.278212	0.186009	0.221153	0.177805	0.189799	0.307021	0.214524	0.10068	0.163712
Sri:ENSMUST00000088786.10	0.238426	0.157225	0.176938	0.147163	0.10449	0.219512	0.103659	0.0924242	0.108924
Gpr12:ENSMUST00000036211.7	0.336471	0.260689	0.311615	0.183192	0.203867	0.164291	0.25971	0.155642	0.192386
Otub1:ENSMUST00000025679.10	0.897219	0.803749	0.853282	0.795337	0.808072	0.885981	0.830303	0.691725	0.768382
Magi1:ENSMUST00000203688.2	0.288863	0.201035	0.168545	0.133629	0.210086	0.183292	0.277352	0.137162	0.184058
Coq4:ENSMUST00000028137.9	0.300383	0.229244	0.264942	0.265256	0.258931	0.295675	0.233537	0.144209	0.222959
5730409E04Rik:ENSMUST00000097886.3	0.777003	0.703488	0.690058	0.672646	0.732725	0.862543	0.727273	0.552211	0.630588
Stk4:ENSMUST00000018353.13	0.965179	0.929304	0.856384	0.789145	0.893388	0.946566	0.946527	0.749854	0.869676
Klhl8:ENSMUST00000112811.7	0.916279	0.767544	0.847328	0.796748	0.854123	0.805755	0.882353	0.747807	0.797565
Amd1:ENSMUST00000099945.5	0.549415	0.466936	0.478888	0.466279	0.428749	0.613247	0.486445	0.348195	0.436622
Nicn1:ENSMUST00000035227.7	0.769495	0.698795	0.688213	0.690476	0.656138	0.774775	0.615385	0.568754	0.655252
Mxd4:ENSMUST00000042701.12	0.545474	0.474005	0.44732	0.504514	0.514898	0.539128	0.478491	0.33909	0.449564
Tmem126b:ENSMUST00000032843.8	0.734853	0.644747	0.687958	0.682137	0.676751	0.712628	0.606455	0.545935	0.596829
Tmem248:ENSMUST00000065329.12	0.859935	0.804196	0.752475	0.819277	0.768293	0.845815	0.807018	0.626531	0.736475
Kcnv1:ENSMUST00000022967.6	0.219716	0.188812	0.184711	0.186428	0.178234	0.205008	0.153502	0.139679	0.165856
Nudt21:ENSMUST00000034204.10	0.588285	0.506367	0.582669	0.587352	0.509705	0.623173	0.447076	0.377415	0.429173
Map3k10:ENSMUST00000138243.1	0.554913	0.52	0.463918	0.547945	0.513109	0.631579	0.518519	0.328358	0.382278
Itsn1:ENSMUST00000114002.8	0.43243	0.408674	0.368363	0.389133	0.236099	0.445307	0.423077	0.225309	0.357722
Btrc:ENSMUST00000065601.12	0.545562	0.453564	0.589274	0.46957	0.432898	0.587531	0.483192	0.323174	0.388109
Pafah1b2:ENSMUST00000172450.2	0.754307	0.646542	0.724467	0.703053	0.63849	0.792407	0.739443	0.527935	0.63976
Mfap1b:ENSMUST00000056732.3	0.392752	0.338737	0.357971	0.351929	0.336721	0.388601	0.359001	0.314119	0.324003
Pdpk1:ENSMUST00000102927.9	0.657568	0.546583	0.623706	0.51599	0.575804	0.685451	0.601773	0.477589	0.528308
Fam172a:ENSMUST00000091459.11	0.472222	0.32334	0.42029	0.428571	0.373898	0.545455	0.3875	0.312997	0.353846
Ppp1r7:ENSMUST00000027494.10	0.246573	0.164619	0.210853	0.208439	0.209003	0.255714	0.140799	0.0911147	0.134467
Neu1:ENSMUST00000007253.5	0.495074	0.438326	0.471616	0.393574	0.408088	0.516807	0.377778	0.339198	0.357008
Cdkn1a:ENSMUST00000233296.1	0.454315	0.341935	0.38	0.390805	0.359343	0.484848	0.280702	0.320368	0.35993
Rit2:ENSMUST00000153060.7	0.571809	0.455285	0.411765	0.511312	0.533026	0.629333	0.697987	0.370892	0.462775
Bnip3:ENSMUST00000106112.1	0.405852	0.312335	0.366852	0.361833	0.325051	0.416566	0.322514	0.253866	0.288073
Pacsin1:ENSMUST00000232437.1	0.449965	0.364201	0.454414	0.422224	0.348809	0.442511	0.344521	0.27322	0.337592
Nceh1:ENSMUST00000046515.14	0.778766	0.671974	0.73684	0.696498	0.710621	0.683521	0.781148	0.579175	0.681119
Hnrnpul1:ENSMUST00000206832.1	0.54303	0.520301	0.582851	0.542792	0.546576	0.512067	0.532009	0.52444	0.517188
Ndufaf4:ENSMUST00000029925.9	0.620207	0.5403	0.572897	0.518106	0.542192	0.644001	0.564525	0.492645	0.530423
Dhdds:ENSMUST00000144668.7	0.847152	0.742849	0.705482	0.83087	0.728847	0.798037	0.693894	0.675437	0.734477
Tmed10:ENSMUST00000040766.8	0.726185	0.643302	0.723328	0.630711	0.63234	0.721283	0.628252	0.545733	0.599985
Me3:ENSMUST00000032856.12	0.351916	0.248677	0.316456	0.269978	0.270869	0.234568	0.275862	0.193548	0.211921
Arl5a:ENSMUST00000036541.7	0.867396	0.812277	0.732642	0.785484	0.788776	0.909793	0.82144	0.627027	0.739625
Cxxc4:ENSMUST00000181904.2	0.646302	0.465617	0.445812	0.512241	0.517075	0.618528	0.460286	0.393104	0.584138
Actb:ENSMUST00000100497.10	0.762754	0.691993	0.806477	0.733561	0.675606	0.793273	0.659259	0.56784	0.598196
Nova2:ENSMUST00000032571.9	0.724781	0.701461	0.625549	0.663402	0.714046	0.6622	0.651153	0.613033	0.618505
Sumo3:ENSMUST00000020501.14	0.920598	0.869326	0.839058	0.847619	0.87525	0.88796	0.909483	0.72787	0.825165
Zfp955b:ENSMUST00000099414.4	0.513035	0.410844	0.458699	0.42637	0.405506	0.464004	0.359451	0.342285	0.397487
Desi2:ENSMUST00000027783.13	0.326613	0.230986	0.30102	0.287879	0.211215	0.360294	0.223529	0.149278	0.237288
Rab27b:ENSMUST00000121693.7	0.451563	0.407236	0.355211	0.334963	0.353981	0.490084	0.310139	0.313127	0.3721
Nrgn:ENSMUST00000065668.11	0.60832	0.552767	0.585971	0.568179	0.557133	0.598378	0.533003	0.499553	0.5255
G3bp2:ENSMUST00000167918.7	0.592063	0.496839	0.593275	0.524138	0.525476	0.546265	0.443686	0.399208	0.477473
Cnih4:ENSMUST00000134115.7	0.399177	0.277603	0.368984	0.37931	0.30888	0.442177	0.355932	0.216405	0.290909
Pnma2:ENSMUST00000089236.10	0.39116	0.322665	0.368259	0.362021	0.34639	0.404755	0.347774	0.283232	0.326962
Zfp386:ENSMUST00000183125.1	0.214389	0.145197	0.182227	0.193704	0.106665	0.237445	0.0537164	0.0637893	0.122577
Ggps1:ENSMUST00000170957.2	0.438284	0.358565	0.361038	0.448945	0.338908	0.492294	0.387945	0.286005	0.343146
Wdr18:ENSMUST00000045247.8	0.182786	0.0966226	0.150939	0.124787	0.101527	0.16713	0.0789733	0.0622788	0.0857686
Mrs2:ENSMUST00000021772.3	0.859633	0.759981	0.858253	0.871537	0.69105	0.835431	0.70255	0.674628	0.717614
Nipa2:ENSMUST00000119041.7	0.620806	0.565923	0.52268	0.457669	0.550846	0.616739	0.537369	0.471505	0.522785
Adcy5:ENSMUST00000114913.2	0.36971	0.44898	0.456667	0.506224	0.494545	0.479495	0.5625	0.391941	0.489736
Mia2:ENSMUST00000176464.7	0.638349	0.679299	0.817107	0.855548	0.686445	0.691287	0.710761	0.693134	0.702957
Trim9:ENSMUST00000167755.2	0.32	0.408088	0.623116	0.649635	0.444138	0.34188	0.376147	0.397415	0.378378
Lyl1:ENSMUST00000238562.1	0.893503	0.927465	0.947574	0.9198	0.924351	0.922581	0.92685	0.919632	0.924405
Actr2:ENSMUST00000000137.7	0.906058	0.908088	0.929905	0.940477	0.918432	0.926132	0.917194	0.923942	0.916646
Map4k2:ENSMUST00000025897.12	0.0990991	0.151515	0.316667	0.271429	0.239264	0.235772	0.322581	0.155405	0.203125
Efnb2:ENSMUST00000001319.14	0.41204	0.475818	0.510661	0.521882	0.511098	0.488597	0.523186	0.517844	0.529621
Mtss2:ENSMUST00000052457.14	0.623932	0.751515	0.808081	0.684211	0.840426	0.650246	0.9	0.740741	0.734043
Frzb:ENSMUST00000028389.3	0.692129	0.835158	0.827102	0.81389	0.808939	0.856779	0.654802	0.805391	0.83644
Def8:ENSMUST00000065534.9	0.202381	0.314554	0.354839	0.296703	0.340237	0.283333	0.313725	0.387324	0.3625
Limch1:ENSMUST00000238785.1	0.168675	0.241379	0.320594	0.309278	0.444444	0.321429	0.390244	0.333959	0.321117
Lemd3:ENSMUST00000119944.7	0.75	0.921875	0.91	0.910256	0.890511	0.895522	1	0.928934	0.865591
Snx2:ENSMUST00000037850.6	0.67713	0.766667	0.761006	0.974026	0.786096	0.861111	0.884615	0.873698	0.831711
Pex1:ENSMUST00000121291.7	0.445378	0.584906	0.666667	0.62069	0.670455	0.626168	0.72549	0.603077	0.596215
Nip7:ENSMUST00000034392.12	0.406007	0.406197	0.41148	0.479401	0.37731	0.481382	0.387015	0.427485	0.396691
Commd7:ENSMUST00000071852.9	0.60781	0.618947	0.668687	0.424855	0.583268	0.695864	0.142857	0.463038	0.388072
Pspc1:ENSMUST00000022507.12	0.730159	0.654618	0.753846	0.747664	0.808511	0.774775	0.804348	0.767754	0.736052
Zzz3:ENSMUST00000106100.8	0.67553	0.600081	0.657497	0.78444	0.734946	0.674943	0.719305	0.74088	0.697471
1110059G10Rik:ENSMUST00000035154.3	0.623656	0.643564	0.813008	0.849673	0.767442	0.676056	0.79661	0.802647	0.756098
Cwc15:ENSMUST00000004200.8	0.474057	0.511379	0.745192	0.633758	0.529825	0.685446	0.696335	0.380759	0.412012
Rnh1:ENSMUST00000210314.1	0.342593	0.324427	0.623377	0.44	0.473934	0.689655	0.557692	0.252381	0.358601
Cope:ENSMUST00000066469.13	0.386667	0.373585	0.581602	0.641463	0.380233	0.481928	0.471204	0.233864	0.261756
Alg5:ENSMUST00000044567.3	0.292135	0.451613	0.5875	0.4	0.368687	0.434783	0.3	0.28739	0.302181
Nap1l1:ENSMUST00000219961.1	0.147436	0.114804	0.421739	0.295082	0.197635	0.174699	0.306931	0.165414	0.16951
Dact2:ENSMUST00000053218.6	0.291667	0.237852	0.456	0.596154	0.217949	0.333333	0.340136	0.186015	0.215627
Serbp1:ENSMUST00000042990.6	0.126683	0.12684	0.190014	0.186306	0.130978	0.171395	0.147641	0.103707	0.128223
Tmem14c:ENSMUST00000021790.6	0.554054	0.527682	0.71987	0.716846	0.537088	0.577465	0.71028	0.381245	0.44071
Tubb2b:ENSMUST00000075774.4	0.0235656	0.0536443	0.246575	0.232446	0.0451168	0.0703013	0.0776256	0.0250852	0.0193349
Lix1:ENSMUST00000115576.2	0.602831	0.588252	0.752296	0.675456	0.547275	0.651664	0.528483	0.531407	0.508062
Psmd9:ENSMUST00000100729.8	0.283397	0.200666	0.375949	0.268091	0.213588	0.321344	0.250192	0.178332	0.184381
Gin1:ENSMUST00000112842.7	0.634146	0.56391	0.757143	0.5	0.619048	0.530612	0.767442	0.531599	0.591176
Zcchc3:ENSMUST00000099207.4	0.443396	0.467836	0.566372	0.256098	0.404348	0.6	0.304348	0.364611	0.390547
Erlec1:ENSMUST00000073192.13	0.200972	0.180756	0.185995	0.190082	0.165968	0.246857	0.194696	0.102475	0.156658
Lamp2:ENSMUST00000074913.11	0.677885	0.714286	0.828829	0.75	0.721519	0.729323	0.644444	0.58006	0.59164
Ranbp6:ENSMUST00000099525.4	0.255172	0.290541	0.457831	0.38961	0.255435	0.242188	0.2	0.300493	0.336207
Tmem203:ENSMUST00000104998.4	0.217501	0.213842	0.338211	0.248862	0.192617	0.291046	0.224017	0.139803	0.125983
U2af1:ENSMUST00000166526.8	0.220919	0.170172	0.344569	0.274413	0.244455	0.169399	0.15917	0.139696	0.152782
Echs1:ENSMUST00000026538.12	0.719424	0.616613	0.770992	0.745902	0.632075	0.635593	0.672414	0.540385	0.589806
Fip1l1:ENSMUST00000113536.7	0.567485	0.554113	0.704545	0.597826	0.596745	0.735751	0.567568	0.456693	0.525449
Zfp24:ENSMUST00000066497.11	0.335164	0.267378	0.406753	0.390821	0.284113	0.366876	0.246267	0.316563	0.296123
Nans:ENSMUST00000030018.4	0.307098	0.221084	0.388213	0.196426	0.239137	0.272674	0.218924	0.158184	0.179678
Ccnh:ENSMUST00000164127.7	0.804878	0.75	0.860759	0.681818	0.753304	0.75	0.684211	0.600551	0.75
Mfsd5:ENSMUST00000051341.5	0.735409	0.714286	0.862857	0.875776	0.77492	0.760274	0.714286	0.625541	0.657841
Sc5d:ENSMUST00000052725.14	0.6403	0.606545	0.80984	0.697182	0.652062	0.725125	0.695329	0.658242	0.548511
Creg1:ENSMUST00000111432.9	0.579832	0.475207	0.613208	0.576087	0.470175	0.567568	0.464286	0.383984	0.441687
Eif4e2:ENSMUST00000113235.7	0.906949	0.878209	0.878869	0.867136	0.867904	0.919003	0.878799	0.835153	0.857129
Atpaf1:ENSMUST00000176047.7	0.518519	0.439252	0.578947	0.496063	0.41791	0.526012	0.511628	0.339492	0.409982
Galt:ENSMUST00000108038.1	0.702638	0.671687	0.853659	0.819742	0.734609	0.757576	0.815126	0.665317	0.693014
Snrpn:ENSMUST00000059305.16	0.895266	0.866431	0.986068	0.991641	0.911901	0.973163	0.976319	0.736683	0.764958
Amz2:ENSMUST00000092500.10	0.409701	0.352833	0.439346	0.590311	0.309208	0.547516	0.315341	0.200072	0.358009
Dynlt1f:ENSMUST00000179554.2	0.784215	0.705953	0.874713	0.885965	0.794348	0.778631	0.785133	0.670236	0.7383
Tmem128:ENSMUST00000087511.9	0.758621	0.755486	0.939024	0.859155	0.76378	0.672269	0.862069	0.81391	0.856436
Slc17a5:ENSMUST00000052441.11	0.335907	0.349544	0.481928	0.310638	0.425791	0.41206	0.316667	0.310861	0.29142
Rpl27a:ENSMUST00000143107.1	0.0672359	0.0831251	0.284441	0.530728	0.0988103	0.203593	0.179814	0.108686	0.146511
Chchd10:ENSMUST00000219839.1	0.434212	0.411473	0.572296	0.670052	0.454208	0.505544	0.54485	0.372016	0.408555
Zfp704:ENSMUST00000041124.12	0.568913	0.590065	0.771064	0.742648	0.611986	0.542124	0.752163	0.632648	0.637602
Btbd9:ENSMUST00000168787.7	0.534189	0.449664	0.536986	0.492867	0.46692	0.632945	0.531045	0.348364	0.451713
Ptov1:ENSMUST00000046575.16	0.548736	0.527216	0.654255	0.703069	0.547251	0.599483	0.552094	0.452582	0.492292
Acat1:ENSMUST00000034547.5	0.412256	0.357143	0.507353	0.444444	0.38632	0.464615	0.48062	0.31225	0.359931
Czib:ENSMUST00000106727.9	0.276995	0.285246	0.394904	0.261111	0.232246	0.31677	0.242424	0.243437	0.267457
Nolc1:ENSMUST00000223728.1	0.632184	0.621324	0.745223	0.651685	0.566327	0.681564	0.631579	0.570776	0.617866
Gna11:ENSMUST00000043604.5	0.66388	0.584469	0.703271	0.638225	0.585106	0.679641	0.544643	0.477908	0.539144
Pank2:ENSMUST00000150843.7	0.297703	0.284692	0.388575	0.281854	0.272171	0.324979	0.285463	0.214913	0.265668
Rala:ENSMUST00000009003.8	0.517715	0.434551	0.550211	0.503944	0.416484	0.556769	0.422585	0.365895	0.409918
Cxcl14:ENSMUST00000224801.1	0.681818	0.73913	0.944444	0.928571	0.777778	0.846154	0.817025	0.820144	0.766355
Gpt2:ENSMUST00000034136.11	0.922918	0.888691	0.959243	0.878353	0.933088	0.897419	0.903465	0.914325	0.89644
Ybx1:ENSMUST00000079644.12	0.637742	0.634218	0.693379	0.721868	0.653692	0.642859	0.67515	0.645777	0.654191
Map4k4:ENSMUST00000168431.6	0.730274	0.76536	0.811234	0.753614	0.7463	0.727134	0.794833	0.692816	0.730036
Snrk:ENSMUST00000118886.8	0.482707	0.40825	0.575563	0.434911	0.436261	0.437768	0.506757	0.448575	0.467976
Rpp14:ENSMUST00000023924.3	0.524561	0.514438	0.60914	0.547478	0.479568	0.567169	0.502349	0.497956	0.476802
Wdr77:ENSMUST00000010278.11	0.485169	0.420995	0.494658	0.438144	0.420806	0.502605	0.359523	0.30945	0.368453
Ubfd1:ENSMUST00000033158.5	0.734767	0.620795	0.762162	0.712121	0.662857	0.77381	0.843373	0.507143	0.631673
Fam160a2:ENSMUST00000179474.8	0.463118	0.366849	0.508214	0.427062	0.403136	0.432328	0.411265	0.333988	0.368787
Rnmt:ENSMUST00000009679.10	0.523364	0.519231	0.603093	0.488263	0.5	0.591093	0.428571	0.366	0.471891
Cacna1i:ENSMUST00000160424.7	0.52302	0.491803	0.637306	0.702326	0.513627	0.582447	0.508772	0.454073	0.502625
Svip:ENSMUST00000209193.1	0.797215	0.78619	0.883904	0.817614	0.743724	0.827595	0.789266	0.788319	0.794991
Fh1:ENSMUST00000027810.13	0.148148	0.137931	0.248062	0.156463	0.12474	0.266272	0.116883	0.0801394	0.12117
Nrip3:ENSMUST00000041460.12	0.463134	0.492913	0.598485	0.45082	0.505088	0.456221	0.595745	0.449173	0.47557
Chrm1:ENSMUST00000163785.1	0.384688	0.364157	0.428763	0.266382	0.248551	0.302615	0.313779	0.300476	0.292859
Pa2g4:ENSMUST00000026425.12	0.591086	0.503901	0.640306	0.663709	0.544435	0.597901	0.692001	0.44898	0.558675
Pabpc1:ENSMUST00000001809.14	0.467354	0.474522	0.649602	0.668468	0.560434	0.527233	0.634146	0.535649	0.528941
Macrod2:ENSMUST00000110064.7	0.604386	0.595593	0.665932	0.602758	0.610936	0.678527	0.587084	0.524432	0.531522
Etf1:ENSMUST00000025218.7	0.681801	0.639653	0.749771	0.691271	0.655903	0.689283	0.663603	0.608802	0.632204
Rbfox1:ENSMUST00000056416.8	0.562388	0.501208	0.589352	0.557486	0.488482	0.576855	0.501564	0.403621	0.442583
Dctn2:ENSMUST00000026479.10	0.347698	0.312195	0.407273	0.377016	0.281175	0.337748	0.294444	0.258907	0.274388
Rap1b:ENSMUST00000064667.8	0.616603	0.576663	0.646126	0.603456	0.594657	0.671147	0.666236	0.600013	0.577219
Dnaja4:ENSMUST00000070070.7	0.637011	0.60521	0.733945	0.621622	0.633826	0.653179	0.681818	0.596811	0.634892
Naa30:ENSMUST00000037362.5	0.792335	0.792073	0.891238	0.880291	0.791176	0.854551	0.7408	0.74742	0.800422
Hacd2:ENSMUST00000061156.9	0.423177	0.312899	0.417032	0.411763	0.269725	0.444827	0.220082	0.293177	0.296025
Frg1:ENSMUST00000033999.7	0.128571	0.0987654	0.205882	0.0939597	0.109339	0.136364	0.112676	0.0600601	0.109635
Lsamp:ENSMUST00000099761.9	0.745076	0.676955	0.790813	0.671987	0.669806	0.754526	0.684992	0.592642	0.658597
Sstr1:ENSMUST00000044299.2	0.546911	0.55102	0.648221	0.585586	0.531983	0.588732	0.5	0.511059	0.535774
Phb:ENSMUST00000125172.7	0.329331	0.296629	0.413793	0.360313	0.297483	0.320158	0.325581	0.305419	0.285527
Cit:ENSMUST00000051704.14	0.50692	0.430446	0.613546	0.515306	0.5299	0.524941	0.490385	0.5	0.515206
Pigk:ENSMUST00000159899.7	0.740181	0.679487	0.790698	0.776371	0.694346	0.727273	0.705882	0.592187	0.675676
Rab6a:ENSMUST00000107048.7	0.737666	0.691633	0.786244	0.803585	0.711947	0.765997	0.778333	0.643912	0.613601
Plppr5:ENSMUST00000239347.1	0.799578	0.741287	0.816618	0.763638	0.722884	0.74193	0.726689	0.614705	0.69462
Ran:ENSMUST00000031383.13	0.273346	0.226833	0.330454	0.263282	0.224149	0.373864	0.257225	0.192389	0.194607
Mrps23:ENSMUST00000024486.13	0.689763	0.646714	0.805894	0.771453	0.724779	0.705934	0.810309	0.674755	0.722114
Nmt1:ENSMUST00000021314.7	0.773626	0.713058	0.820588	0.785953	0.736976	0.825503	0.820755	0.606481	0.698675
Adam23:ENSMUST00000087374.9	0.636673	0.610063	0.69787	0.609812	0.633633	0.602175	0.596408	0.516123	0.565137
Lrrc58:ENSMUST00000078717.6	0.496562	0.481311	0.547069	0.56847	0.510062	0.602986	0.557271	0.40996	0.48696
Atp6v1c1:ENSMUST00000022904.7	0.818516	0.84163	0.893403	0.896499	0.814256	0.88752	0.865048	0.703311	0.774423
Rpp21:ENSMUST00000077535.4	0.313456	0.267402	0.402715	0.425139	0.31223	0.269565	0.342205	0.26406	0.303376
Bloc1s4:ENSMUST00000071949.4	0.584314	0.570213	0.682819	0.59204	0.581649	0.633333	0.646552	0.589719	0.547878
Wdr83os:ENSMUST00000140621.1	0.547368	0.544808	0.623583	0.738255	0.533947	0.507353	0.572289	0.448216	0.503749
Cbx5:ENSMUST00000118152.7	0.636668	0.618096	0.70603	0.718576	0.576696	0.669838	0.575997	0.520652	0.557331
Ociad2:ENSMUST00000201908.3	0.425327	0.435274	0.520895	0.491532	0.410004	0.550515	0.426395	0.369619	0.36725
Cdc37l1:ENSMUST00000225210.1	0.787821	0.674348	0.791791	0.781716	0.737137	0.810903	0.816596	0.614563	0.717628
Ptpn1:ENSMUST00000029053.7	0.361022	0.383784	0.420849	0.392857	0.305613	0.352	0.397959	0.261337	0.289941
Samm50:ENSMUST00000023071.7	0.266234	0.241497	0.30855	0.243902	0.220482	0.315934	0.169811	0.148739	0.178039
Enpp2:ENSMUST00000041591.15	0.588086	0.546613	0.647657	0.509569	0.530377	0.550339	0.545055	0.53756	0.547771
Rab14:ENSMUST00000028238.14	0.572824	0.494419	0.589781	0.519026	0.489964	0.580069	0.544831	0.40463	0.461026
Higd1a:ENSMUST00000215007.1	0.375339	0.323229	0.442735	0.392315	0.331283	0.421719	0.408654	0.29347	0.369562
Snx30:ENSMUST00000030080.6	0.785948	0.76836	0.821912	0.768126	0.771946	0.778519	0.843203	0.688553	0.717934
Ciao1:ENSMUST00000174030.7	0.193205	0.14206	0.287577	0.198613	0.17247	0.195648	0.226402	0.148367	0.186784
Kras:ENSMUST00000111710.7	0.520053	0.466484	0.5445	0.515757	0.480481	0.54902	0.459462	0.372536	0.445737
Camk2g:ENSMUST00000100837.10	0.675241	0.584587	0.702804	0.691152	0.614602	0.676737	0.647303	0.530577	0.578214
Coa8:ENSMUST00000040519.11	0.442688	0.417582	0.540925	0.684729	0.409449	0.382716	0.486486	0.426332	0.438634
Sh3gl2:ENSMUST00000030212.14	0.730806	0.734389	0.862159	0.886047	0.771664	0.783522	0.88	0.764767	0.757081
Epm2aip1:ENSMUST00000060711.7	0.754678	0.669565	0.589091	0.689076	0.719008	0.705263	0.790476	0.635611	0.667121
Adgra1:ENSMUST00000026548.13	0.809611	0.796064	0.71399	0.795252	0.797197	0.790286	0.752392	0.790887	0.789783
Psmc6:ENSMUST00000022380.8	0.348549	0.326481	0.33738	0.390846	0.35891	0.425937	0.400614	0.376293	0.398205
Zcchc17:ENSMUST00000134159.2	0.753463	0.738059	0.604407	0.589625	0.700673	0.664564	0.669673	0.766991	0.74499
Fgf14:ENSMUST00000095529.9	0.487474	0.514962	0.493975	0.534974	0.5172	0.515537	0.484082	0.483082	0.507025
Kcnk9:ENSMUST00000044624.7	0.514835	0.542965	0.413327	0.544757	0.546902	0.408273	0.480793	0.551678	0.582069
Arhgef17:ENSMUST00000107032.2	0.259048	0.297593	0.176471	0.164835	0.199637	0.163636	0.396226	0.219761	0.471366
Sez6l2:ENSMUST00000106335.7	0.695304	0.65757	0.50647	0.508403	0.66453	0.658031	0.553846	0.705288	0.65501
Calm1:ENSMUST00000110082.10	0.199998	0.165447	0.166544	0.148322	0.166462	0.224644	0.172498	0.144804	0.154311
Rab2b:ENSMUST00000022765.13	0.89726	0.751592	0.598361	0.847458	0.812183	0.889908	0.84	0.8	0.801653
Jade1:ENSMUST00000026865.14	0.710788	0.696029	0.580352	0.697827	0.716303	0.714568	0.707428	0.706223	0.722225
Scnm1:ENSMUST00000172572.8	0.540373	0.476667	0.507576	0.820755	0.523148	0.47619	0.46875	0.428814	0.436229
Mical2:ENSMUST00000050149.11	0.358974	0.346049	0.447837	0.666667	0.371853	0.388372	0.396825	0.343849	0.354404
Mtif2:ENSMUST00000020749.12	0.407767	0.417582	0.52	0.694915	0.378505	0.493671	0.392857	0.29845	0.398601
Dtl:ENSMUST00000027933.10	0.908648	0.875837	0.91142	0.849455	0.91096	0.874075	0.810367	0.887214	0.905252
Dynlt2b:ENSMUST00000080316.7	0.561404	0.539877	0.740741	0.892562	0.632381	0.628866	0.950617	0.558612	0.634965
Ndufa10:ENSMUST00000027478.6	0.271235	0.350934	0.32635	0.464044	0.340799	0.335339	0.372571	0.357341	0.334136
Cwc22:ENSMUST00000111821.8	0.246622	0.237288	0.349794	0.515306	0.234767	0.208145	0.281553	0.241611	0.246533
Trpv2:ENSMUST00000018651.13	0.706252	0.708092	0.755548	0.807978	0.723931	0.727649	0.737109	0.682254	0.688894
Rpl9:ENSMUST00000127874.5	0.719049	0.707747	0.646718	0.914242	0.640349	0.681636	0.520211	0.697148	0.674217
Mrpl39:ENSMUST00000116584.1	0.108696	0.142857	0.285714	0.357143	0.156951	0.188679	0.285714	0.103448	0.109137
Dcaf6:ENSMUST00000027856.12	0.552222	0.652375	0.718569	0.835507	0.609373	0.553126	0.669008	0.619826	0.617439
Dpm1:ENSMUST00000154111.7	0.157775	0.113642	0.169912	0.177038	0.125958	0.151529	0.168232	0.125478	0.128457
Shprh:ENSMUST00000044053.12	0.442495	0.413069	0.461734	0.618975	0.452505	0.450218	0.516376	0.455979	0.449869
Ppid:ENSMUST00000029382.12	0.472131	0.414931	0.517699	0.669767	0.43433	0.518367	0.586207	0.487416	0.452333
Ap5m1:ENSMUST00000037473.5	0.378698	0.367568	0.371134	0.606557	0.482143	0.449153	0.363636	0.370192	0.407534
Eif3c:ENSMUST00000032992.6	0.378968	0.334432	0.386139	0.533923	0.356725	0.310559	0.245614	0.286925	0.331627
Brd3:ENSMUST00000028282.14	0.23113	0.229771	0.318305	0.449171	0.22645	0.293041	0.225899	0.220519	0.204532
Ppme1:ENSMUST00000032963.9	0.608728	0.568213	0.645941	0.74359	0.579892	0.600634	0.579167	0.477311	0.54189
Lysmd1:ENSMUST00000066386.5	0.777778	0.701389	0.75	0.911765	0.733871	0.78022	0.722222	0.672043	0.705426
Cyb5r4:ENSMUST00000168529.8	0.659481	0.662299	0.713598	0.743799	0.662194	0.709	0.714037	0.581162	0.63623
Spen:ENSMUST00000078886.9	0.224638	0.217105	0.166667	0.35	0.126904	0.125	0.24	0.176166	0.128
Rps25:ENSMUST00000080300.8	0.00922111	0.00283527	0.0101781	0.189406	0.00235894	0.0760618	0.0373223	0.00641729	0.00351958
Dynlt1c:ENSMUST00000092966.4	0.247312	0.182055	0.289562	0.374622	0.218495	0.216495	0.18408	0.141791	0.197923
Stimate:ENSMUST00000006701.7	0.482398	0.436948	0.55074	0.647002	0.50684	0.653563	0.470044	0.374039	0.41482
Brpf1:ENSMUST00000113119.7	0.16185	0.215596	0.260274	0.373737	0.210938	0.189655	0.25	0.173913	0.185976
Zfp575:ENSMUST00000094705.2	0.118812	0.0625	0.0813953	0.25641	0.107692	0.133333	0.115385	0.0597303	0.0860759
Fkbp2:ENSMUST00000238181.1	0.876836	0.867316	0.88812	0.911822	0.878415	0.86946	0.881187	0.858291	0.86097
Nucb1:ENSMUST00000211765.1	0.129296	0.0912823	0.10035	0.110904	0.108017	0.0817128	0.0470057	0.0679945	0.071053
Mospd3:ENSMUST00000111007.7	0.390728	0.362319	0.451613	0.533898	0.319079	0.483871	0.432836	0.354839	0.35102
Tnpo2:ENSMUST00000166592.1	0.666667	0.625263	0.742857	0.805054	0.638436	0.61516	0.65	0.588133	0.64422
Tcea1:ENSMUST00000165720.2	0.924978	0.893539	0.906259	0.906263	0.904081	0.9311	0.920013	0.883468	0.90051
Srsf2:ENSMUST00000092404.12	0.804647	0.779716	0.806259	0.823312	0.798116	0.782954	0.806466	0.753906	0.786636
Gstz1:ENSMUST00000063117.9	0.622951	0.649746	0.738806	0.772277	0.623596	0.582278	0.741935	0.567696	0.585831
Prelid3a:ENSMUST00000025411.8	0.9222	0.884914	0.919665	0.907991	0.893531	0.929042	0.918329	0.897496	0.897316
B3galt6:ENSMUST00000052185.4	0.153418	0.110779	0.123994	0.177867	0.102185	0.0479394	0.147028	0.102215	0.0656013
L1cam:ENSMUST00000114430.7	0.324405	0.299065	0.353261	0.478516	0.345354	0.337691	0.330097	0.302301	0.312298
Mthfs:ENSMUST00000085256.7	0.125448	0.128421	0.164948	0.27907	0.146919	0.103774	0.141509	0.100688	0.123568
Ebna1bp2:ENSMUST00000030501.14	0.309417	0.247002	0.328571	0.384615	0.220949	0.406593	0.31405	0.171941	0.215835
Slitrk3:ENSMUST00000192477.1	0.167393	0.152583	0.174398	0.176487	0.114281	0.1799	0.102405	0.136596	0.146595
Comt:ENSMUST00000165430.7	0.385845	0.37541	0.455983	0.454819	0.373241	0.402008	0.398598	0.362276	0.3861
Xxylt1:ENSMUST00000055389.8	0.786885	0.858333	0.8	0.947368	0.829694	0.75	0.74359	0.831169	0.767544
Ppp3ca:ENSMUST00000070198.13	0.29357	0.297637	0.329748	0.348833	0.294903	0.309249	0.302823	0.264733	0.284378
Brcc3:ENSMUST00000033544.13	0.448628	0.451684	0.475168	0.484595	0.406594	0.463863	0.452211	0.393942	0.416293
Rnf157:ENSMUST00000100202.9	0.911846	0.88383	0.90502	0.888099	0.885896	0.913317	0.886396	0.869415	0.882815
Vps39:ENSMUST00000028752.7	0.561404	0.565421	0.647436	0.68595	0.542781	0.532164	0.515625	0.543243	0.512528
Slc7a8:ENSMUST00000022787.7	0.798462	0.73871	0.830769	0.893048	0.740782	0.830556	0.615385	0.706444	0.733524
Cct8:ENSMUST00000026704.13	0.179379	0.159116	0.250597	0.305556	0.175933	0.257075	0.208333	0.107345	0.169513
Shfl:ENSMUST00000043911.7	0.490122	0.495043	0.547658	0.6062	0.456898	0.52847	0.553909	0.424296	0.457768
Ksr2:ENSMUST00000180430.1	0.917278	0.907043	0.894877	0.901804	0.906241	0.911108	0.922293	0.90515	0.879276
Me1:ENSMUST00000034989.14	0.536458	0.530797	0.56051	0.596774	0.46304	0.608187	0.47619	0.357911	0.401709
Dlgap2:ENSMUST00000133298.7	0.349168	0.366719	0.353692	0.499956	0.335682	0.482625	0.365971	0.334596	0.378188
Dctn1:ENSMUST00000113913.7	0.88024	0.81352	0.918396	0.950637	0.852401	0.845953	0.837398	0.76049	0.766215
Tspan13:ENSMUST00000020896.16	0.837017	0.805801	0.847201	0.831131	0.810094	0.863297	0.778116	0.778745	0.80165
Rgl1:ENSMUST00000111859.7	0.638238	0.636112	0.661728	0.75492	0.642907	0.710933	0.621004	0.643287	0.651762
Gm14440:ENSMUST00000109051.7	0.733659	0.627322	0.681664	0.741839	0.628593	0.786883	0.795471	0.607838	0.626793
Mlx:ENSMUST00000107302.7	0.323276	0.251834	0.28125	0.388889	0.279208	0.379562	0.225352	0.216945	0.268657
Mrpl45:ENSMUST00000019026.9	0.10929	0.112903	0.138211	0.239669	0.0911854	0.184	0.181818	0.0840517	0.135556
Zmynd8:ENSMUST00000088113.10	0.582577	0.549165	0.660378	0.632053	0.597277	0.616312	0.574336	0.603698	0.583072
Rbm8a:ENSMUST00000198027.4	0.246522	0.209615	0.250834	0.239286	0.22013	0.228091	0.260573	0.202685	0.215511
Gm14288:ENSMUST00000123863.1	0.735667	0.628474	0.679327	0.741274	0.628056	0.792712	0.811732	0.612456	0.628643
Rplp2-ps1:ENSMUST00000238938.1	0.588587	0.606615	0.692666	0.737888	0.620598	0.602062	0.611111	0.604599	0.60844
Csf2ra:ENSMUST00000076046.6	0.241546	0.268817	0.187097	0.37193	0.269716	0.293478	0.266129	0.223553	0.270014
Wdr89:ENSMUST00000062370.8	0.585008	0.602109	0.688191	0.732753	0.617476	0.597938	0.609375	0.601757	0.604911
Fndc5:ENSMUST00000102600.3	0.494071	0.414013	0.427807	0.537549	0.364356	0.430939	0.397849	0.378378	0.425154
Cyrib:ENSMUST00000063838.10	0.383178	0.342691	0.435547	0.459954	0.34039	0.440068	0.358696	0.291645	0.297476
Tm9sf3:ENSMUST00000025989.9	0.454018	0.416642	0.497773	0.536073	0.419222	0.557115	0.483927	0.346495	0.404325
Ppp6c:ENSMUST00000028087.5	0.695494	0.610082	0.707647	0.723228	0.618428	0.737424	0.625237	0.598629	0.566892
Mrpl40:ENSMUST00000023391.15	0.427119	0.409836	0.439614	0.557604	0.465649	0.473404	0.441558	0.412879	0.44434
Gpr26:ENSMUST00000045840.4	0.73945	0.674522	0.704449	0.768911	0.675219	0.677489	0.570546	0.629168	0.669496
Rgmb:ENSMUST00000170578.2	0.587301	0.571397	0.567609	0.624641	0.558099	0.570723	0.545036	0.561011	0.570706
Tsr2:ENSMUST00000112683.8	0.342857	0.294737	0.342949	0.40708	0.35634	0.328638	0.264706	0.189675	0.290685
Synj2bp:ENSMUST00000163402.7	0.312698	0.250676	0.33677	0.408183	0.278903	0.444032	0.370603	0.205077	0.292022
Tomm6:ENSMUST00000113301.1	0.408246	0.417351	0.470353	0.509839	0.434136	0.437011	0.447622	0.340022	0.363802
Arpc5:ENSMUST00000077755.10	0.40456	0.365293	0.427759	0.474069	0.36192	0.390829	0.369695	0.318594	0.351057
Vldlr:ENSMUST00000167487.7	0.541202	0.492469	0.53438	0.599516	0.505982	0.580074	0.486284	0.428885	0.4794
Triqk:ENSMUST00000183345.1	0.182927	0.0346821	0.0795455	0.2	0.149254	0.227273	0.0588235	0.0753425	0.0502959
Lyrm4:ENSMUST00000053265.7	0.0677966	0.0472441	0.0769231	0.169492	0.0933333	0.0547945	0.105263	0.02	0.041958
Plekha1:ENSMUST00000120441.7	0.854764	0.827082	0.822178	0.859329	0.811288	0.885636	0.934785	0.739532	0.825581
Dusp7:ENSMUST00000172306.2	0.741697	0.76144	0.770352	0.82651	0.756208	0.764964	0.764603	0.754051	0.758394
Sfxn1:ENSMUST00000021930.9	0.495576	0.399111	0.48975	0.539807	0.418158	0.5173	0.471919	0.345188	0.382814
Snhg11:ENSMUST00000109488.7	0.239625	0.211804	0.272824	0.321959	0.214108	0.314857	0.190981	0.175905	0.169121
Chordc1:ENSMUST00000001825.8	0.246958	0.269729	0.31963	0.346066	0.234799	0.247437	0.234292	0.22189	0.197859
Gm7324:ENSMUST00000094051.5	0.831615	0.727513	0.824561	0.857988	0.781395	0.75	0.828947	0.670483	0.731493
Nos1ap:ENSMUST00000160456.7	0.753327	0.777774	0.810687	0.831096	0.676784	0.584617	0.863919	0.788902	0.852806
Plp1:ENSMUST00000033800.12	0.612529	0.622992	0.662811	0.689385	0.56403	0.659702	0.667436	0.510666	0.549939
Fam122a:ENSMUST00000099556.1	0.101055	0.0892896	0.134866	0.111498	0.0934095	0.118039	0.072061	0.0991971	0.0911375
Hars:ENSMUST00000001416.7	0.376884	0.336809	0.324009	0.45202	0.35969	0.369305	0.342105	0.32327	0.32133
Desi1:ENSMUST00000152227.7	0.674428	0.672284	0.682777	0.70319	0.616679	0.664773	0.634949	0.562865	0.594007
Stk11:ENSMUST00000003152.13	0.687701	0.681306	0.697894	0.741955	0.6334	0.658518	0.631562	0.596593	0.698931
Lmo4:ENSMUST00000121796.7	0.240611	0.237575	0.301155	0.34362	0.241082	0.258552	0.222087	0.217706	0.228446
Yipf4:ENSMUST00000024873.6	0.802508	0.7603	0.796992	0.875458	0.712619	0.790262	0.51938	0.791244	0.783708
Dut:ENSMUST00000051605.8	0.217172	0.216078	0.212062	0.194374	0.231832	0.315627	0.288075	0.210576	0.215165
Plppr4:ENSMUST00000061071.12	0.268942	0.282074	0.359501	0.386945	0.27537	0.323602	0.269727	0.231742	0.293741
Sh3rf1:ENSMUST00000034060.6	0.052381	0.0416667	0.0722892	0.178571	0.0754717	0.068323	0.363636	0.104839	0.0789474
Mrpl50:ENSMUST00000057829.3	0.789267	0.714235	0.713486	0.828483	0.765984	0.829971	0.740418	0.682708	0.699171
Bicd2:ENSMUST00000048544.13	0.743421	0.80303	0.751592	0.875862	0.781726	0.779343	0.816327	0.755627	0.773455
Dcaf8:ENSMUST00000074144.10	0.64916	0.661765	0.61976	0.718182	0.621795	0.689873	0.584071	0.550756	0.60402
Rps18:ENSMUST00000174609.8	0.631163	0.604993	0.65869	0.710578	0.627568	0.614638	0.614383	0.57387	0.594542
Glo1:ENSMUST00000236335.1	0.419671	0.358866	0.378085	0.38007	0.343302	0.402163	0.374485	0.30207	0.329442
Atp5a1:ENSMUST00000026495.14	0.616942	0.53994	0.637525	0.656697	0.513198	0.607908	0.542571	0.513868	0.574212
Mpv17l:ENSMUST00000128757.7	0.324416	0.295684	0.299773	0.318013	0.291465	0.302281	0.304173	0.251597	0.272228
Gm2007:ENSMUST00000178133.7	0.269298	0.284894	0.194335	0.192944	0.260914	0.239644	0.234487	0.283383	0.246388
Gm11007:ENSMUST00000178120.7	0.270232	0.285812	0.19594	0.193965	0.26253	0.240628	0.238032	0.28477	0.247714
Slc25a17:ENSMUST00000023040.8	0.904762	0.854701	0.860465	0.757812	0.866142	0.869863	0.846154	0.844794	0.8829
N6amt1:ENSMUST00000118115.1	0.603391	0.561925	0.599669	0.511768	0.577164	0.593463	0.67323	0.514536	0.540611
Chchd4:ENSMUST00000040835.8	0.796262	0.818948	0.855559	0.755906	0.835899	0.865131	0.891738	0.827285	0.814348
Nol4:ENSMUST00000097651.9	0.824956	0.845157	0.843742	0.822871	0.833754	0.818751	0.806184	0.843142	0.824386
Ugp2:ENSMUST00000102875.10	0.364926	0.377014	0.35252	0.328522	0.359395	0.415965	0.36251	0.364763	0.389961
Prkaa2:ENSMUST00000030243.7	0.531083	0.523778	0.511091	0.379727	0.540412	0.531293	0.398516	0.462383	0.482139
Abca5:ENSMUST00000043961.11	0.923077	0.867647	0.893204	0.78481	0.923611	0.931507	1	0.901345	0.907859
Zfp971:ENSMUST00000108926.2	0.247688	0.190364	0.234568	0.141194	0.300729	0.296411	0.310775	0.361987	0.317484
Faf2:ENSMUST00000126071.8	0.616512	0.554501	0.632734	0.537542	0.511907	0.636785	0.525854	0.489168	0.517133
Fkbp4:ENSMUST00000032508.10	0.640301	0.562232	0.570423	0.466667	0.577101	0.672414	0.752	0.567675	0.622907
Phax:ENSMUST00000008445.6	0.616766	0.607735	0.652174	0.486989	0.639108	0.631799	0.608696	0.610261	0.614563
Mecp2:ENSMUST00000100750.9	0.911851	0.877888	0.882491	0.827431	0.877892	0.914673	0.874134	0.808295	0.84102
Epha5:ENSMUST00000113398.7	0.402362	0.366458	0.31109	0.341573	0.391816	0.351907	0.403022	0.369317	0.40333
Gapvd1:ENSMUST00000102800.7	0.329987	0.341281	0.314497	0.300238	0.331726	0.341886	0.353762	0.334292	0.324046
Zfp131:ENSMUST00000177916.7	0.428094	0.465574	0.489011	0.315789	0.542222	0.44	0.381818	0.419173	0.47395
Bzw2:ENSMUST00000020856.5	0.735632	0.789683	0.746667	0.61809	0.775665	0.805195	0.842105	0.751651	0.7806
Nppc:ENSMUST00000027449.5	0.938356	0.915179	0.959732	0.777778	0.937388	0.952381	0.985294	0.943099	0.925254
Uqcrc2:ENSMUST00000033176.6	0.551106	0.582677	0.494888	0.4125	0.565607	0.535826	0.480176	0.621044	0.580093
Cntnap2:ENSMUST00000114641.7	0.628718	0.639073	0.522998	0.434549	0.633002	0.571125	0.667788	0.601652	0.696672
Gm14419:ENSMUST00000126358.7	0.324675	0.204301	0.21875	0.0759494	0.194737	0.269231	0.162162	0.272189	0.283422
Nosip:ENSMUST00000003513.10	0.638025	0.584721	0.635111	0.572816	0.642638	0.672303	0.666976	0.621603	0.632888
Gm14326:ENSMUST00000108932.7	0.274291	0.228114	0.218016	0.139862	0.209962	0.216056	0.12527	0.214122	0.187724
Gm14399:ENSMUST00000109062.7	0.655014	0.689111	0.689611	0.720084	0.695345	0.714722	0.752015	0.706635	0.69325
Tnr:ENSMUST00000192069.5	0.837978	0.845235	0.857834	0.632545	0.840212	0.768444	0.697285	0.778437	0.76196
Psma4:ENSMUST00000034848.13	0.70639	0.637178	0.616505	0.483376	0.661212	0.647399	0.662857	0.662447	0.690644
Cox5b:ENSMUST00000081180.6	0.531982	0.522604	0.513291	0.304196	0.554712	0.564062	0.650744	0.418798	0.480558
Sbk1:ENSMUST00000056028.10	0.286624	0.448529	0.307692	0.161017	0.292428	0.15942	0.513514	0.418367	0.581522
Prpf4b:ENSMUST00000077853.4	0.50963	0.485853	0.543395	0.506111	0.51746	0.586995	0.55662	0.495124	0.499821
Pgd:ENSMUST00000084124.6	0.154255	0.292398	0.316239	0.0675676	0.324111	0.277228	0.190476	0.330472	0.23565
Ufm1:ENSMUST00000146598.7	0.255459	0.224964	0.227946	0.207845	0.2389	0.26759	0.215431	0.205185	0.220531
Exosc2:ENSMUST00000038474.13	0.883929	0.876344	0.74026	0.617978	0.857798	0.864865	0.815789	0.837912	0.867532
Taf1:ENSMUST00000101341.8	0.879725	0.867797	0.809045	0.621118	0.873096	0.892308	0.837209	0.859873	0.848485
Epha7:ENSMUST00000080934.10	0.56	0.657143	0.659259	0.409639	0.681818	0.627273	0.566667	0.720379	0.695783
Mtln:ENSMUST00000135091.1	0.730552	0.783751	0.722093	0.412736	0.798504	0.810855	0.80226	0.726423	0.684015
Ftsj1:ENSMUST00000033513.9	0.381356	0.569832	0.474227	0.583333	0.685714	0.57971	0.357143	0.412214	0.357827
Chpf2:ENSMUST00000088295.8	0.438081	0.452901	0.38182	0.377681	0.624551	0.502436	0.622467	0.43145	0.476016
Arpp21:ENSMUST00000178410.1	0.235599	0.22834	0.200236	0.223689	0.288468	0.247731	0.208557	0.196357	0.189956
Wscd2:ENSMUST00000094452.3	0.135318	0.110052	0.0752355	0.047907	0.214418	0.175647	0.0239672	0.0503414	0.0994656
Gfod2:ENSMUST00000013294.15	0.129707	0.088	0.0588235	0.115385	0.187629	0.0535714	0	0.0309278	0.042
Trub1:ENSMUST00000026072.4	0.472792	0.482427	0.471316	0.457075	0.494686	0.492412	0.487709	0.408067	0.447255
Ptpn3:ENSMUST00000075637.10	0.745665	0.716495	0.617647	0.770642	0.777518	0.772021	0.714286	0.552521	0.645161
Slit1:ENSMUST00000169141.7	0.462366	0.39934	0.365517	0.438914	0.512998	0.526316	0.647059	0.300546	0.375
Rab3c:ENSMUST00000167824.2	0.788667	0.713332	0.755695	0.740904	0.616202	0.777352	0.606123	0.552327	0.624422
Rgma:ENSMUST00000119206.2	0.333333	0.423729	0.193878	0.213483	0.128978	0.0808625	0.153846	0.37561	0.569892
Nme7:ENSMUST00000193683.5	0.555556	0.441341	0.54	0.556962	0.472362	0.770992	0.423077	0.329545	0.373288
Armc8:ENSMUST00000185524.6	0.377953	0.324176	0.402778	0.375	0.396761	0.569767	0.333333	0.30597	0.4
Brix1:ENSMUST00000022855.11	0.147287	0.0782123	0.134021	0.0943396	0.0897959	0.283333	0.119048	0.0505837	0.0772627
Golga7b:ENSMUST00000122375.7	0.685073	0.642686	0.671986	0.703474	0.602019	0.799031	0.632075	0.50651	0.597231
Eny2:ENSMUST00000060652.4	0.386408	0.295547	0.293182	0.343284	0.296585	0.48468	0.368421	0.216511	0.297052
Fam204a:ENSMUST00000065286.1	0.49994	0.447132	0.501944	0.473839	0.460816	0.53873	0.418259	0.41982	0.490299
Lyrm9:ENSMUST00000147875.8	0.554241	0.401903	0.462192	0.467765	0.472573	0.64507	0.482295	0.280373	0.488916
Zfp316:ENSMUST00000161448.7	0.0598669	0.0879823	0.0649446	0.0631853	0.104559	0.166547	0.104104	0.0632524	0.0326063
Pik3r1:ENSMUST00000055518.12	0.68668	0.646168	0.70541	0.629293	0.6729	0.785815	0.411662	0.584946	0.518124
Gmcl1:ENSMUST00000001185.13	0.557309	0.527466	0.555959	0.594616	0.55639	0.699835	0.518214	0.502882	0.45167
Usp14:ENSMUST00000092096.13	0.525994	0.487117	0.526042	0.41196	0.45	0.616751	0.524691	0.350556	0.419614
1190007I07Rik:ENSMUST00000176200.7	0.16987	0.149157	0.15299	0.122211	0.0768559	0.197877	0.101867	0.0953568	0.0870713
Fgf12:ENSMUST00000100024.2	0.321659	0.235106	0.286209	0.307685	0.271208	0.354332	0.287336	0.171157	0.215041
Lmo3:ENSMUST00000162772.7	0.497501	0.407693	0.513949	0.487356	0.420411	0.629	0.492521	0.296725	0.352071
Rfk:ENSMUST00000025617.3	0.734166	0.696255	0.720621	0.679474	0.681303	0.860787	0.666436	0.637455	0.705403
Actr10:ENSMUST00000021479.5	0.286777	0.222009	0.316088	0.202756	0.255821	0.390007	0.306029	0.156537	0.213197
Ndufa9:ENSMUST00000205002.2	0.189583	0.12713	0.215686	0.220217	0.116716	0.292162	0.203704	0.0763473	0.102405
Snapc1:ENSMUST00000021532.5	0.224861	0.209498	0.148639	0.194921	0.11493	0.364568	0.127681	0.126899	0.148348
Acsl3:ENSMUST00000035779.14	0.257143	0.259259	0.338129	0.206612	0.270053	0.421053	0.349206	0.238095	0.234188
Cdk7:ENSMUST00000091299.7	0.682785	0.552706	0.571367	0.614604	0.596678	0.724825	0.725249	0.423802	0.557103
Maip1:ENSMUST00000027114.5	0.290323	0.172973	0.263636	0.239437	0.208029	0.364865	0.357143	0.154394	0.194301
Rsrc1:ENSMUST00000161726.1	0.653927	0.647452	0.827808	0.748335	0.649681	0.827049	0.755738	0.542862	0.656288
Nop58:ENSMUST00000191142.6	0.246892	0.25202	0.34829	0.351596	0.223846	0.46747	0.280731	0.187844	0.304547
Hectd3:ENSMUST00000050067.9	0.290503	0.26506	0.261905	0.311688	0.349624	0.462366	0.272727	0.276498	0.315615
Glod4:ENSMUST00000017430.11	0.66936	0.610917	0.654106	0.644325	0.634967	0.758645	0.551692	0.526003	0.585017
Srpk1:ENSMUST00000130643.8	0.497312	0.509677	0.574359	0.573099	0.462287	0.630769	0.490566	0.444795	0.414358
Ppil2:ENSMUST00000231712.1	0.354167	0.160839	0.233333	0.117647	0.21978	0.365854	0.384615	0.164794	0.20678
Cln8:ENSMUST00000027554.7	0.489193	0.364579	0.405243	0.434485	0.457202	0.540975	0.412075	0.323153	0.348396
Mtch2:ENSMUST00000136872.7	0.293307	0.222714	0.25876	0.235	0.218013	0.363636	0.266667	0.163671	0.197518
Fam3c:ENSMUST00000165576.7	0.284028	0.206997	0.21372	0.207493	0.221461	0.357798	0.29661	0.11516	0.200962
Trub2:ENSMUST00000048044.11	0.796748	0.715447	0.756098	0.754098	0.74	0.897436	0.708333	0.763838	0.716667
Smu1:ENSMUST00000030117.4	0.352941	0.343511	0.432432	0.375	0.368852	0.507353	0.410714	0.335347	0.349005
Anapc15:ENSMUST00000144207.8	0.156863	0.0891089	0.119205	0.196078	0.139013	0.266667	0.145833	0.0967185	0.0988275
Ube2n:ENSMUST00000099329.4	0.34139	0.26003	0.325237	0.29669	0.262082	0.432772	0.288068	0.167222	0.219432
Slc1a4:ENSMUST00000109594.7	0.75	0.666667	0.605769	0.761905	0.757895	0.821429	0.807692	0.553719	0.632653
Cfap410:ENSMUST00000105397.9	0.397351	0.358657	0.492	0.42029	0.375171	0.545946	0.534091	0.400599	0.382598
Zdhhc18:ENSMUST00000084238.4	0.690608	0.644172	0.740385	0.752809	0.659091	0.8	0.833333	0.559322	0.614545
Sdf4:ENSMUST00000050078.12	0.199	0.206147	0.277778	0.249558	0.188606	0.331909	0.246032	0.140845	0.158044
Usp11:ENSMUST00000033383.2	0.66436	0.646789	0.651408	0.658537	0.6407	0.791667	0.7	0.648276	0.618297
Mgll:ENSMUST00000113585.8	0.433888	0.374648	0.434636	0.418591	0.361517	0.515486	0.404296	0.280231	0.363018
Rgs2:ENSMUST00000127206.7	0.410553	0.384276	0.411457	0.377504	0.372952	0.450632	0.382232	0.355261	0.350924
Dlat:ENSMUST00000034567.3	0.563759	0.541035	0.586536	0.551432	0.507041	0.620065	0.556321	0.502815	0.487658
Hmgb1:ENSMUST00000085546.12	0.367478	0.331699	0.388316	0.392381	0.317542	0.469388	0.373288	0.318162	0.295464
Znrf1:ENSMUST00000171182.7	0.254482	0.25597	0.232723	0.277302	0.273852	0.356177	0.237157	0.19424	0.215773
Ube2k:ENSMUST00000142407.7	0.253726	0.176727	0.291617	0.235497	0.204392	0.344235	0.186364	0.167105	0.180832
Tbpl1:ENSMUST00000127698.7	0.613333	0.485663	0.598504	0.605536	0.523481	0.677711	0.672	0.509346	0.526132
Pcgf5:ENSMUST00000225920.1	0.413793	0.403101	0.52	0.471154	0.414201	0.556701	0.378788	0.391586	0.452055
Znrf2:ENSMUST00000079869.12	0.14076	0.193699	0.167216	0.193351	0.193648	0.307689	0.582649	0.186611	0.25548
Arcn1:ENSMUST00000034607.9	0.196629	0.199507	0.151943	0.242574	0.159176	0.305825	0.153061	0.143376	0.156889
Gosr2:ENSMUST00000021329.13	0.757897	0.737755	0.822829	0.817527	0.692786	0.86038	0.7932	0.686222	0.685762
Cisd2:ENSMUST00000029815.7	0.650211	0.544651	0.611764	0.582643	0.556675	0.704677	0.573811	0.490287	0.540495
D10Wsu102e:ENSMUST00000020488.8	0.227277	0.210198	0.214896	0.180662	0.230306	0.407691	0.28585	0.226066	0.264914
Kcna1:ENSMUST00000055168.4	0.4913	0.416124	0.431042	0.447955	0.398852	0.533154	0.390736	0.339159	0.351546
Anapc1:ENSMUST00000014499.9	0.529002	0.503915	0.584016	0.581769	0.48944	0.653052	0.583964	0.585981	0.542637
Ypel2:ENSMUST00000018571.4	0.830816	0.727273	0.766187	0.774468	0.762332	0.882353	0.75	0.684307	0.746739
Emc7:ENSMUST00000069747.5	0.196907	0.120782	0.166369	0.167732	0.106253	0.245566	0.140351	0.0714062	0.106959
Hnrnpa3:ENSMUST00000111962.7	0.5129	0.499394	0.560035	0.574069	0.519625	0.63058	0.585038	0.42919	0.473853
Rab3ip:ENSMUST00000020375.6	0.272808	0.204028	0.205073	0.286542	0.18974	0.332211	0.30912	0.128331	0.207273
Cox10:ENSMUST00000049091.8	0.657609	0.61244	0.612069	0.739583	0.630435	0.710059	0.489796	0.446602	0.557692
Bod1l:ENSMUST00000050556.10	0.741079	0.760556	0.792364	0.796379	0.791235	0.843536	0.831269	0.78191	0.746263
Rbm4:ENSMUST00000178615.7	0.132316	0.112101	0.198647	0.149409	0.165268	0.260935	0.247967	0.0920529	0.117283
Ier5l:ENSMUST00000065134.3	0.138462	0.135135	0.197917	0.222222	0.150396	0.268817	0.261905	0.117424	0.119835
Pdcd10:ENSMUST00000161137.7	0.192308	0.153696	0.25	0.157068	0.172464	0.297753	0.179487	0.167273	0.169412
Nrip1:ENSMUST00000121927.7	0.394853	0.371428	0.334679	0.284813	0.276946	0.449624	0.335184	0.262404	0.291261
Ube2b:ENSMUST00000020657.12	0.507007	0.480849	0.47868	0.478089	0.466701	0.548621	0.498733	0.459426	0.480785
Mtmr7:ENSMUST00000048898.16	0.24867	0.195642	0.246732	0.27225	0.263461	0.309151	0.294861	0.202514	0.22961
Mrpl35:ENSMUST00000065103.3	0.244473	0.151978	0.153486	0.177019	0.125333	0.268334	0.181987	0.110149	0.156871
Cacng2:ENSMUST00000019290.2	0.383367	0.349258	0.375574	0.339183	0.338125	0.455695	0.262506	0.307669	0.313222
Fam81a:ENSMUST00000034749.15	0.429426	0.346346	0.358557	0.429828	0.373719	0.477836	0.386565	0.273292	0.359411
Zc3h14:ENSMUST00000110104.9	0.564955	0.497778	0.488372	0.534247	0.505022	0.611429	0.550725	0.451675	0.482569
Fam169a:ENSMUST00000169863.8	0.602067	0.583648	0.551034	0.608115	0.645264	0.611946	0.606572	0.476792	0.607306
Med9:ENSMUST00000081980.6	0.420402	0.345778	0.393666	0.41006	0.329132	0.448193	0.394198	0.261679	0.322239
1700025G04Rik:ENSMUST00000044581.13	0.358262	0.363883	0.370721	0.37088	0.300474	0.41706	0.286548	0.228967	0.28083
Ica1l:ENSMUST00000027172.12	0.68655	0.63689	0.68312	0.623401	0.682907	0.756886	0.78319	0.559316	0.605559
Slc43a2:ENSMUST00000042561.13	0.7375	0.732984	0.668831	0.738462	0.776224	0.8375	0.789474	0.63388	0.709534
Extl2:ENSMUST00000029575.11	0.238828	0.197705	0.243129	0.153292	0.202462	0.257244	0.218733	0.198022	0.194868
Dedd2:ENSMUST00000058702.6	0.238579	0.220721	0.253846	0.284553	0.190031	0.295238	0.204545	0.12532	0.114558
Elavl1:ENSMUST00000098950.5	0.826002	0.719861	0.784497	0.788527	0.712694	0.791517	0.693968	0.57592	0.677605
Anapc16:ENSMUST00000182898.7	0.217958	0.223248	0.235966	0.221838	0.208357	0.276187	0.248507	0.224694	0.226077
Tsn:ENSMUST00000027623.8	0.361179	0.288324	0.329631	0.325037	0.299513	0.393105	0.291828	0.204083	0.247708
Gpm6a:ENSMUST00000033915.8	0.379348	0.292428	0.308008	0.295644	0.37994	0.42198	0.527985	0.226358	0.280485
Ccny:ENSMUST00000053917.5	0.398009	0.349756	0.36868	0.375168	0.320417	0.440728	0.3059	0.258125	0.298195
Ptchd1:ENSMUST00000038665.5	0.649811	0.568679	0.654303	0.679385	0.594149	0.726842	0.669604	0.659066	0.641323
Ddhd1:ENSMUST00000111828.3	0.277154	0.246793	0.304367	0.302218	0.293249	0.333666	0.267606	0.227429	0.267247
Bckdk:ENSMUST00000124533.2	0.109589	0.109091	0.0932203	0.0561798	0.0780347	0.203125	0.172414	0.0726916	0.0972222
Slc4a8:ENSMUST00000023776.12	0.786308	0.788356	0.703343	0.710099	0.763083	0.847451	0.823891	0.652334	0.804178
Vps36:ENSMUST00000033866.8	0.711117	0.587329	0.727768	0.543909	0.653947	0.77676	0.881102	0.566371	0.669367
Tmem33:ENSMUST00000037918.11	0.552763	0.524008	0.59751	0.57875	0.494623	0.533993	0.66295	0.510549	0.495465
Coa5:ENSMUST00000027286.6	0.766854	0.768737	0.804082	0.775641	0.703041	0.860377	0.844828	0.729447	0.74717
Abi1:ENSMUST00000126112.7	0.479564	0.467405	0.498964	0.447936	0.470877	0.556163	0.419825	0.441066	0.458429
Chmp3:ENSMUST00000059462.11	0.432258	0.365897	0.446667	0.358779	0.373819	0.492063	0.577236	0.350943	0.377284
Rgs7bp:ENSMUST00000063551.6	0.450333	0.387792	0.472853	0.443498	0.383534	0.490079	0.391267	0.315227	0.352944
Ddost:ENSMUST00000030538.4	0.44086	0.445026	0.462094	0.438406	0.426667	0.509225	0.486486	0.323827	0.388186
Gng12:ENSMUST00000043148.12	0.355495	0.313559	0.280016	0.303596	0.259472	0.4006	0.154977	0.215598	0.202989
Fitm2:ENSMUST00000109418.1	0.834752	0.789191	0.816298	0.757018	0.790291	0.886348	0.648029	0.698082	0.756775
Grb2:ENSMUST00000106499.7	0.816663	0.744718	0.838875	0.819318	0.774903	0.845127	0.697628	0.680386	0.737059
Sh3glb1:ENSMUST00000198254.4	0.577623	0.517116	0.598293	0.524487	0.528198	0.573449	0.476646	0.498169	0.497304
Ube2d3:ENSMUST00000197134.2	0.518885	0.514204	0.560032	0.549758	0.495224	0.588462	0.515396	0.480755	0.476653
Cdk5:ENSMUST00000030814.10	0.283077	0.241916	0.265714	0.262338	0.242574	0.331731	0.205882	0.166377	0.219892
Cetn3:ENSMUST00000022009.9	0.458221	0.46879	0.476043	0.535104	0.482575	0.582583	0.596491	0.484549	0.445977
St13:ENSMUST00000172107.7	0.416752	0.390047	0.387776	0.420384	0.391583	0.476078	0.441788	0.301575	0.35223
Stx12:ENSMUST00000030698.4	0.416095	0.391625	0.413778	0.417737	0.406869	0.467371	0.450017	0.347313	0.367855
Zfp706:ENSMUST00000078976.8	0.454337	0.392892	0.422615	0.429458	0.428062	0.514859	0.515748	0.371806	0.407614
Csnk1a1:ENSMUST00000165123.7	0.419011	0.405478	0.462027	0.424048	0.415765	0.516004	0.382279	0.323007	0.376348
Ola1:ENSMUST00000028517.12	0.558487	0.545556	0.569315	0.550196	0.542508	0.576166	0.539429	0.541298	0.52973
Ssbp2:ENSMUST00000004094.14	0.27303	0.21535	0.257231	0.231016	0.218991	0.304084	0.188184	0.170165	0.179259
Gabrb1:ENSMUST00000031122.8	0.375941	0.378882	0.430637	0.397577	0.366858	0.434734	0.340919	0.291377	0.284615
Armc1:ENSMUST00000029125.9	0.521867	0.472768	0.509335	0.469827	0.47575	0.499306	0.431913	0.404593	0.450632
Atxn7l3b:ENSMUST00000099276.3	0.42606	0.341981	0.420862	0.396224	0.342989	0.452266	0.357398	0.305243	0.326988
Phospho2:ENSMUST00000028494.8	0.838428	0.799242	0.840278	0.745763	0.7851	0.878981	0.734375	0.73578	0.758403
Cebpg:ENSMUST00000130491.2	0.255987	0.23277	0.260991	0.25495	0.242427	0.316679	0.207353	0.204546	0.208566
Chn1:ENSMUST00000112024.9	0.158429	0.140107	0.166136	0.141691	0.131842	0.230634	0.150323	0.0981052	0.110979
Stmn2:ENSMUST00000029002.8	0.496679	0.429397	0.535572	0.489096	0.438746	0.558318	0.45592	0.428618	0.433024
Kif3c:ENSMUST00000020999.6	0.455611	0.4	0.4384	0.444037	0.411851	0.503737	0.419355	0.296242	0.401379
Vps37a:ENSMUST00000098817.3	0.729441	0.639077	0.687843	0.66102	0.615955	0.699422	0.730251	0.454915	0.645335
Hnrnpk:ENSMUST00000116403.8	0.510309	0.459589	0.444792	0.481651	0.504239	0.548947	0.55	0.382168	0.425402
Dusp12:ENSMUST00000027970.13	0.0782123	0.130268	0.165563	0.0833333	0.147208	0.223022	0.0923077	0.121711	0.100935
Reep5:ENSMUST00000006027.6	0.879019	0.785721	0.846581	0.822911	0.785022	0.887304	0.827525	0.694112	0.759133
Hgsnat:ENSMUST00000037609.7	0.406071	0.374187	0.321609	0.424573	0.332126	0.437492	0.331036	0.23572	0.330163
Pja1:ENSMUST00000113792.1	0.585163	0.562579	0.585235	0.610997	0.55088	0.615612	0.611833	0.529469	0.56889
Ube2e3:ENSMUST00000028398.13	0.104114	0.0853917	0.115314	0.12611	0.0708452	0.186278	0.148747	0.0703067	0.0834196
Ptp4a1:ENSMUST00000233506.1	0.404104	0.354986	0.347945	0.384596	0.358568	0.433098	0.328099	0.294585	0.327166
Nap1l1:ENSMUST00000065917.15	0.505814	0.453627	0.478395	0.477519	0.471682	0.562045	0.495553	0.400029	0.453616
Yipf5:ENSMUST00000025364.5	0.115136	0.0782979	0.114537	0.120284	0.109669	0.145953	0.100644	0.0623113	0.0913419
Golt1b:ENSMUST00000032372.6	0.443367	0.397604	0.427715	0.488621	0.420686	0.486896	0.440431	0.351333	0.414609
Sox4:ENSMUST00000067230.5	0.312853	0.262808	0.291679	0.277228	0.272108	0.361704	0.220564	0.219795	0.247734
Gpbp1:ENSMUST00000047627.13	0.47482	0.404553	0.478873	0.511182	0.449173	0.522968	0.450331	0.378211	0.391147
Skp1:ENSMUST00000037324.11	0.440995	0.429194	0.491074	0.44003	0.437893	0.542776	0.396159	0.440898	0.432894
Shisa7:ENSMUST00000066041.11	0.779703	0.847887	0.785156	0.831633	0.818994	0.720513	0.865169	0.834975	0.837684
Uqcc3:ENSMUST00000096253.6	0.414691	0.423707	0.464105	0.423066	0.437311	0.325703	0.478297	0.466473	0.437261
Klf12:ENSMUST00000228216.1	0.871206	0.888542	0.850046	0.795635	0.840705	0.851068	0.884238	0.870642	0.884188
Surf4:ENSMUST00000015011.9	0.728226	0.70392	0.722715	0.6803	0.729211	0.656071	0.701009	0.65974	0.712518
Rbm15b:ENSMUST00000055843.8	0.483221	0.5	0.565	0.45	0.504587	0.333333	0.538462	0.486005	0.432018
Aars:ENSMUST00000034441.7	0.488166	0.56962	0.539146	0.489524	0.501326	0.408348	0.400966	0.663645	0.606322
Ube2a:ENSMUST00000200835.3	0.542088	0.558943	0.577093	0.599119	0.538913	0.423611	0.552941	0.641691	0.613424
Slc35a2:ENSMUST00000115660.11	0.278195	0.319149	0.426966	0.316456	0.3	0.154545	0.2	0.415625	0.356401
Pnrc2:ENSMUST00000030436.11	0.0883467	0.120438	0.107412	0.111917	0.129152	0.118081	0.196783	0.10211	0.117853
Hecw2:ENSMUST00000120904.7	0.470199	0.464115	0.424242	0.569767	0.480211	0.539326	0.712121	0.418283	0.495935
Plaat1:ENSMUST00000089824.10	0.666667	0.666667	0.787234	0.75	0.592	0.810345	0.888889	0.649891	0.679063
Arl16:ENSMUST00000076921.6	0.460733	0.466546	0.546075	0.502618	0.525253	0.423387	0.693878	0.486056	0.450675
Chid1:ENSMUST00000153191.7	0.205212	0.170723	0.210748	0.200684	0.19423	0.202368	0.269958	0.168359	0.180497
Dpp10:ENSMUST00000112606.7	0.345697	0.353461	0.367206	0.39548	0.449883	0.344754	0.583942	0.345517	0.404141
Cand1:ENSMUST00000020315.12	0.411533	0.349302	0.397732	0.400264	0.374754	0.472121	0.594846	0.316564	0.37646
Vma21:ENSMUST00000114577.7	0.454122	0.378246	0.40747	0.413121	0.418417	0.478697	0.540426	0.357366	0.372244
Ankrd17:ENSMUST00000014421.14	0.120879	0.138079	0.190299	0.153771	0.186323	0.145863	0.281478	0.158468	0.17818
Dbndd2:ENSMUST00000109349.8	0.220026	0.222048	0.262911	0.247289	0.265915	0.331887	0.400685	0.22508	0.269575
Sbno1:ENSMUST00000065263.11	0.719633	0.693858	0.698403	0.702507	0.666056	0.746134	0.824945	0.592196	0.666678
Psmd8:ENSMUST00000209034.1	0.787093	0.729722	0.78747	0.764838	0.713479	0.771018	0.819325	0.730632	0.738632
Ccdc47:ENSMUST00000002043.9	0.277693	0.295849	0.355114	0.341753	0.297003	0.306433	0.427865	0.287235	0.291887
Fmnl1:ENSMUST00000107027.8	0.0519481	0.0430195	0.0929368	0	0.105033	0.103261	0.183099	0.0565693	0.0550622
Ubl3:ENSMUST00000079324.13	0.772849	0.778878	0.890034	0.898204	0.826637	0.812825	0.943005	0.828037	0.81012
Bri3bp:ENSMUST00000049040.13	0.78825	0.728912	0.73881	0.710115	0.727366	0.79462	0.790804	0.559129	0.661289
Ppt1:ENSMUST00000030412.10	0.792217	0.720401	0.781308	0.83223	0.793382	0.721369	0.889401	0.715582	0.798512
Dock3:ENSMUST00000044532.10	0.442176	0.419617	0.424371	0.424027	0.403456	0.492217	0.5451	0.426604	0.439251
Atp6v1g1:ENSMUST00000035301.6	0.63681	0.537142	0.521583	0.553517	0.583659	0.631683	0.679307	0.474262	0.599429
Csrnp3:ENSMUST00000122912.7	0.62426	0.579655	0.626276	0.60762	0.574334	0.638266	0.695687	0.494774	0.495281
Cacybp:ENSMUST00000014370.10	0.67637	0.625969	0.646635	0.692547	0.623696	0.67354	0.754545	0.640402	0.637004
Rundc3a:ENSMUST00000107105.8	0.536791	0.587168	0.558702	0.574661	0.641728	0.513344	0.685767	0.549434	0.580868
Gdap1l1:ENSMUST00000109420.9	0.380207	0.304058	0.361886	0.373167	0.328306	0.410092	0.310913	0.281096	0.306974
Mapre1:ENSMUST00000028981.8	0.416881	0.342554	0.397939	0.362948	0.331465	0.422751	0.379533	0.287257	0.33977
Nrcam:ENSMUST00000110748.3	0.49446	0.434202	0.4599	0.500683	0.461264	0.518815	0.549276	0.327085	0.451805
Ier3ip1:ENSMUST00000136800.1	0.293296	0.318163	0.400568	0.374885	0.323676	0.324131	0.440835	0.352655	0.337466
Smarca4:ENSMUST00000098948.9	0.0550886	0.0454684	0.0611305	0.0618955	0.0750607	0.0723328	0.165121	0.0610401	0.0789605
Snph:ENSMUST00000094456.9	0.871863	0.918519	0.899371	0.88785	0.886689	0.845113	0.786458	0.896453	0.882727
Cadm3:ENSMUST00000111220.7	0.44876	0.450374	0.484246	0.425024	0.422246	0.419672	0.375952	0.445248	0.432212
Itm2b:ENSMUST00000022704.8	0.419598	0.429718	0.456551	0.489247	0.427459	0.50983	0.401413	0.488243	0.466549
Ipo5:ENSMUST00000032898.8	0.586061	0.567538	0.572397	0.582197	0.577441	0.495326	0.480827	0.610063	0.581396
Tcf25:ENSMUST00000211932.1	0.83713	0.831728	0.828511	0.829098	0.818807	0.828067	0.797237	0.820181	0.820714
Dock4:ENSMUST00000037488.7	0.755454	0.776228	0.758982	0.76931	0.75492	0.732121	0.705626	0.763124	0.74081
Gda:ENSMUST00000087600.9	0.855502	0.811971	0.742114	0.885075	0.784988	0.738671	0.671429	0.840395	0.812086
Dpp6:ENSMUST00000120555.7	0.0985373	0.110209	0.112288	0.103526	0.106582	0.0851523	0.0680284	0.0993313	0.111643
Arhgef12:ENSMUST00000165665.8	0.908788	0.905311	0.926266	0.906957	0.913157	0.904951	0.790455	0.931656	0.914297
Wdr12:ENSMUST00000027173.14	0.147257	0.110291	0.120604	0.150088	0.116661	0.134187	0.142525	0.106777	0.127297
D430041D05Rik:ENSMUST00000136156.8	0.928064	0.920545	0.931016	0.952503	0.925483	0.90648	0.913952	0.909419	0.913259
Rtn4:ENSMUST00000078830.10	0.882109	0.866652	0.84581	0.923584	0.847411	0.86223	0.680729	0.885103	0.863715
2810004N23Rik:ENSMUST00000034465.8	0.431655	0.375661	0.449541	0.532468	0.477679	0.488095	0.4375	0.324042	0.353952
Scaf1:ENSMUST00000211735.1	0.384196	0.426471	0.495192	0.449198	0.440252	0.433862	0.479452	0.323741	0.398268
Appbp2:ENSMUST00000018625.9	0.614369	0.575206	0.634004	0.626086	0.560735	0.621144	0.604302	0.490456	0.58671
Slc37a3:ENSMUST00000090243.7	0.368932	0.340996	0.352632	0.409524	0.357923	0.337349	0.264151	0.244589	0.31758
Fbxo28:ENSMUST00000051431.9	0.704653	0.645548	0.672895	0.667592	0.682634	0.655228	0.695925	0.531049	0.593216
Rmnd1:ENSMUST00000042251.10	0.318966	0.319728	0.416667	0.361446	0.389189	0.363636	0.375	0.252688	0.34
Bcat1:ENSMUST00000032402.11	0.242574	0.160428	0.162791	0.258065	0.21564	0.261538	0.222222	0.116732	0.187151
Ptges3:ENSMUST00000052798.13	0.652532	0.594428	0.614838	0.586817	0.622245	0.685708	0.611699	0.538289	0.586109
Lrpap1:ENSMUST00000030986.14	0.349631	0.26848	0.35443	0.275785	0.296252	0.349186	0.325581	0.199438	0.282255
Senp2:ENSMUST00000023561.7	0.390325	0.415858	0.419271	0.383022	0.399233	0.456986	0.345641	0.295495	0.375835
Dpysl3:ENSMUST00000121805.8	0.843137	0.873518	0.880184	0.845794	0.744565	0.842105	0.72619	0.704433	0.735376
Ccdc50:ENSMUST00000100026.9	0.889214	0.850699	0.88014	0.929216	0.878511	0.919733	0.903874	0.770169	0.845156
Napg:ENSMUST00000025474.13	0.945006	0.900463	0.92471	0.908696	0.939815	0.946768	0.924812	0.81492	0.89068
Snx6:ENSMUST00000005798.8	0.253012	0.192488	0.217742	0.237624	0.264822	0.297297	0.342857	0.119205	0.17199
Zbtb43:ENSMUST00000095035.2	0.77742	0.64364	0.78606	0.724686	0.728816	0.843727	0.88	0.616368	0.681445
Plch2:ENSMUST00000176194.7	0.58871	0.599057	0.675325	0.621399	0.681416	0.608696	0.736842	0.508143	0.5875
Kcnc3:ENSMUST00000207493.1	0.790566	0.743409	0.78	0.799127	0.726415	0.817844	0.741294	0.642512	0.714286
Copg1:ENSMUST00000113607.9	0.771398	0.70997	0.767176	0.756098	0.717341	0.785388	0.680982	0.633378	0.736467
Faim2:ENSMUST00000023750.8	0.667498	0.597349	0.631424	0.606116	0.577769	0.659592	0.591779	0.493579	0.571249
Bag4:ENSMUST00000038498.9	0.708551	0.714914	0.777546	0.76896	0.758139	0.749807	0.703268	0.612782	0.680423
Eef2k:ENSMUST00000047875.15	0.514831	0.493583	0.507585	0.486055	0.504745	0.519511	0.511241	0.407664	0.467948
Rab3gap2:ENSMUST00000069652.7	0.618732	0.56427	0.572352	0.579052	0.597882	0.659717	0.665392	0.454207	0.602409
Atmin:ENSMUST00000109099.3	0.774049	0.702703	0.764706	0.780105	0.783333	0.730496	0.878788	0.62963	0.687023
Fzr1:ENSMUST00000140901.7	0.837929	0.77644	0.856711	0.843643	0.819767	0.867056	0.827189	0.702106	0.787601
Clpb:ENSMUST00000001884.13	0.345178	0.289474	0.282314	0.296361	0.257659	0.364076	0.33098	0.208019	0.255702
Tagap:ENSMUST00000036370.7	0.723022	0.738636	0.797101	0.765957	0.738241	0.808081	0.828125	0.626298	0.683775
Nubp1:ENSMUST00000023146.4	0.359551	0.33557	0.311111	0.275862	0.28125	0.318182	0.416667	0.190805	0.281167
Psen1:ENSMUST00000101225.1	0.522852	0.475606	0.543147	0.453978	0.438802	0.472717	0.368091	0.369123	0.454949
Ykt6:ENSMUST00000002818.8	0.521936	0.452571	0.429878	0.37377	0.500426	0.458128	0.545455	0.360169	0.471538
Slc38a1:ENSMUST00000088454.12	0.663114	0.624273	0.639138	0.626333	0.582355	0.663338	0.568264	0.492949	0.554201
Aida:ENSMUST00000109166.7	0.223331	0.189362	0.168219	0.207169	0.242025	0.189506	0.171061	0.152289	0.203722
Mapt:ENSMUST00000106992.9	0.712904	0.645839	0.736758	0.696046	0.640291	0.725474	0.664365	0.523226	0.613043
Mkln1:ENSMUST00000026699.14	0.549574	0.530614	0.56304	0.559241	0.497782	0.578174	0.521145	0.43061	0.553712
Trpm3:ENSMUST00000237357.1	0.619608	0.602753	0.669011	0.61379	0.598038	0.535562	0.585035	0.55362	0.640912
Plcb1:ENSMUST00000131552.4	0.712093	0.718524	0.680543	0.660004	0.727235	0.729183	0.764604	0.575305	0.659766
Dvl3:ENSMUST00000003318.12	0.9	0.916667	0.795918	0.827586	0.8	0.846154	0.9	0.740541	0.847737
Ube4a:ENSMUST00000117506.8	0.8	0.786802	0.829545	0.842105	0.818182	0.793991	0.891304	0.683168	0.740838
Mmab:ENSMUST00000031560.13	0.889521	0.778885	0.880079	0.820472	0.849248	0.870892	0.839711	0.706337	0.826782
Etv1:ENSMUST00000095767.10	0.374812	0.362136	0.401008	0.375179	0.430373	0.378843	0.375108	0.298037	0.396221
Hspa13:ENSMUST00000114244.1	0.44581	0.383465	0.432241	0.428219	0.361377	0.402687	0.393404	0.269555	0.316425
Tmem19:ENSMUST00000219890.1	0.757285	0.689264	0.727072	0.726493	0.680424	0.720588	0.755638	0.567126	0.698504
Rrp36:ENSMUST00000024766.6	0.181075	0.147813	0.120647	0.148242	0.143542	0.145206	0.131212	0.130391	0.130763
Slc25a51:ENSMUST00000107796.7	0.759124	0.732877	0.743929	0.727915	0.677019	0.758017	0.657343	0.593168	0.664516
Gopc:ENSMUST00000105475.8	0.724287	0.627141	0.626002	0.665244	0.636303	0.679865	0.673758	0.509483	0.631638
Dusp15:ENSMUST00000123121.8	0.716418	0.620668	0.723765	0.625118	0.572919	0.742587	0.735294	0.486508	0.517135
Syn2:ENSMUST00000169345.3	0.800277	0.753061	0.812259	0.780094	0.743073	0.832326	0.757536	0.6355	0.69536
Atg4b:ENSMUST00000027502.15	0.404314	0.36559	0.449984	0.412556	0.376654	0.431929	0.422499	0.317399	0.374232
Rtf2:ENSMUST00000029005.3	0.78635	0.758772	0.813765	0.748538	0.752161	0.827103	0.75	0.642857	0.731861
Prps2:ENSMUST00000026839.4	0.940397	0.900826	0.907692	0.898551	0.86014	0.982143	0.909091	0.772321	0.855491
Elavl4:ENSMUST00000106598.7	0.438283	0.348001	0.448981	0.408019	0.3886	0.450333	0.378338	0.275589	0.353371
Ablim2:ENSMUST00000054598.11	0.669213	0.663008	0.618411	0.665891	0.644883	0.695062	0.656582	0.53389	0.654516
Atp1b1:ENSMUST00000027863.12	0.848386	0.792179	0.813693	0.783362	0.823089	0.850796	0.867395	0.696713	0.774426
Tctn3:ENSMUST00000025981.14	0.403135	0.439438	0.382548	0.484839	0.440633	0.470288	0.455098	0.308282	0.450684
Gpr89:ENSMUST00000029738.13	0.464453	0.401798	0.413163	0.419417	0.305073	0.399571	0.368705	0.260383	0.356626
Plbd2:ENSMUST00000031597.6	0.765542	0.779998	0.695816	0.651085	0.708178	0.789393	0.713717	0.609395	0.694964
Cyria:ENSMUST00000069066.13	0.919862	0.857008	0.907199	0.884533	0.859219	0.888374	0.859626	0.743939	0.817317
Yy1:ENSMUST00000021692.8	0.618042	0.557385	0.608528	0.575341	0.560103	0.603968	0.521043	0.457428	0.554417
Cd2bp2:ENSMUST00000166791.7	0.822524	0.77537	0.843712	0.777807	0.73729	0.822186	0.678474	0.657768	0.772679
Efcab14:ENSMUST00000106525.8	0.577276	0.540431	0.531943	0.623847	0.522575	0.690104	0.519595	0.417015	0.496096
Ap3s2:ENSMUST00000075657.7	0.608642	0.581643	0.606809	0.570828	0.597869	0.667145	0.590699	0.460019	0.559353
Nup50:ENSMUST00000165443.3	0.616117	0.499317	0.510969	0.524147	0.640251	0.627561	0.448559	0.435247	0.563202
Rpp38:ENSMUST00000062672.6	0.881423	0.845316	0.888476	0.885714	0.835443	0.826923	0.844444	0.710526	0.798561
Nipal3:ENSMUST00000102549.9	0.946203	0.916836	0.94023	0.93128	0.939046	0.919355	0.897959	0.800983	0.915123
Ak1:ENSMUST00000113278.8	0.790527	0.701721	0.764027	0.712872	0.715313	0.776563	0.736602	0.588371	0.699301
Syt13:ENSMUST00000028648.2	0.912154	0.826681	0.841367	0.85458	0.852898	0.862785	0.833396	0.686533	0.798403
Ldah:ENSMUST00000169104.2	0.812865	0.773585	0.828947	0.831858	0.767677	0.811024	0.828571	0.654596	0.755682
Rhobtb2:ENSMUST00000022665.3	0.607811	0.579072	0.606899	0.546359	0.553894	0.613938	0.579603	0.44797	0.571475
Sike1:ENSMUST00000029447.11	0.489541	0.409943	0.467158	0.445771	0.442621	0.489259	0.410195	0.297433	0.396931
Clcn4:ENSMUST00000000619.7	0.568776	0.505423	0.549391	0.511513	0.498399	0.519903	0.547297	0.374824	0.467319
Armcx3:ENSMUST00000086884.4	0.881119	0.827288	0.823529	0.829861	0.815409	0.864802	0.820513	0.694132	0.787118
Lmbrd1:ENSMUST00000095062.9	0.733636	0.693795	0.686032	0.693197	0.695691	0.743225	0.74392	0.545409	0.639704
Usp47:ENSMUST00000210309.1	0.56266	0.573991	0.59751	0.567308	0.597738	0.64532	0.695122	0.448758	0.561753
Tial1:ENSMUST00000106226.8	0.540035	0.449665	0.401764	0.445584	0.527609	0.524956	0.595794	0.333726	0.452101
Pdk3:ENSMUST00000045748.6	0.520444	0.472199	0.537046	0.434741	0.418473	0.56614	0.453099	0.277877	0.40634
Tmsb15l:ENSMUST00000127404.7	0.627979	0.548898	0.751586	0.525653	0.606594	0.63961	0.871212	0.488166	0.564095
Mlst8:ENSMUST00000234941.1	0.809917	0.765766	0.837838	0.815385	0.875	0.853659	0.892857	0.658163	0.795745
Phf12:ENSMUST00000049167.13	0.582857	0.568627	0.448	0.523364	0.568323	0.604396	0.714286	0.391975	0.579221
Nkain1:ENSMUST00000105993.3	0.90625	0.834171	0.901408	0.865079	0.876106	0.8	0.875	0.68231	0.8
Stk24:ENSMUST00000079817.7	0.832559	0.767468	0.758924	0.751358	0.81933	0.814187	0.775837	0.608079	0.739543
Il6st:ENSMUST00000183663.7	0.517647	0.438467	0.300163	0.479021	0.525245	0.450781	0.377616	0.245039	0.455382
Zfp966:ENSMUST00000109018.2	0.809729	0.804771	0.806848	0.783839	0.825247	0.829526	0.784299	0.833919	0.826866
Zfp968:ENSMUST00000109048.2	0.783104	0.781342	0.784752	0.763767	0.804227	0.808054	0.763862	0.813265	0.807916

## Sheet: warm.per.ctype.sig.utr.TEINH
WARM values for each selected TEINH cluster (Fig.7B)
	TEINH10	TEINH11	TEINH15	TEINH16	TEINH17	TEINH18	TEINH19	TEINH4
Cpne2:ENSMUST00000048653.9	1	0.104839	0.142857	0	0.333333	0.0638298	0.215385	0.308036
Lhfpl5:ENSMUST00000080780.7	0.991342	0.211538	0.725	0.549451	0.571429	0.444444	0.258621	0.648649
Bpnt2:ENSMUST00000084949.2	0.43444	0.381635	0.447908	0.454758	0.396218	0.431771	0.464145	0.375121
Tmem128:ENSMUST00000087511.9	0.96875	0.258503	0.748148	0.4875	0.612245	0.459854	0.323529	0.62069
Calm1:ENSMUST00000110082.10	0.105709	0.073996	0.122752	0.0691542	0.0984757	0.088692	0.0551542	0.10934
Nalcn:ENSMUST00000000201.6	0.625582	0.617295	0.612931	0.580685	0.571272	0.637566	0.607715	0.640243
Psma3:ENSMUST00000160027.7	0.286193	0.207517	0.149798	0.2388	0.182328	0.206142	0.201582	0.16154
Amz2:ENSMUST00000092500.10	0.359099	0.567214	0.619132	0.435598	0.572667	0.589992	0.517632	0.43795
Sh3gl2:ENSMUST00000030212.14	0.834646	0.36087	0.311189	0.518939	0.552239	0.508197	0.453159	0.545455
Cope:ENSMUST00000066469.13	0.783886	0.312839	0.254613	0.525692	0.5	0.423358	0.440945	0.44186
Dpm1:ENSMUST00000154111.7	0.153853	0.151593	0.112917	0.110444	0.172719	0.153765	0.162821	0.147717
Ndufa10:ENSMUST00000027478.6	0.63608	0.174036	0.45256	0.410693	0.373345	0.204824	0.239327	0.398513
Cwc15:ENSMUST00000004200.8	0.961145	0.539048	0.770701	0.583106	0.583026	0.572391	0.565771	0.634146
Ndufb5:ENSMUST00000127477.7	0.703588	0.332947	0.253126	0.408348	0.433241	0.323602	0.408174	0.322934
Arpc2:ENSMUST00000113820.8	0.791045	0.21519	0.644809	0.431034	0.566586	0.4	0.344928	0.654286
Ccdc59:ENSMUST00000020049.8	0.552573	0.321414	0.462576	0.387554	0.355699	0.29401	0.310077	0.614274
Sft2d1:ENSMUST00000154553.1	0.653333	0.334677	0.368263	0.342756	0.341365	0.401254	0.332056	0.32
Stk11:ENSMUST00000003152.13	0.779396	0.362903	0.668277	0.511814	0.514015	0.508078	0.394863	0.630872
Odr4:ENSMUST00000111913.8	0.913669	0.614319	0.58042	0.585526	0.745665	0.707071	0.572207	0.5875
Pgf:ENSMUST00000223220.1	0.954286	0.557471	0.783439	0.692308	0.614035	0.644444	0.666667	0.888889
Nme7:ENSMUST00000193683.5	1	0.830357	0.586207	0.753247	0.8	0.816667	0.777108	0.555556
Phax:ENSMUST00000008445.6	0.77129	0.409396	0.627803	0.606796	0.512658	0.5	0.501035	0.639535
Trpv2:ENSMUST00000018651.13	0.610719	0.590639	0.610836	0.574973	0.653772	0.601927	0.576869	0.621063
Nell2:ENSMUST00000166170.8	0.982143	0.75	0.4875	0.970297	0.852941	0.911111	0.910714	0.777778
Yipf2:ENSMUST00000034700.14	0.877428	0.718389	0.325581	0.891556	0.848206	0.797854	0.76439	0.75
1700025G04Rik:ENSMUST00000044581.13	0.251439	0.297553	0.308437	0.229323	0.34112	0.348397	0.292468	0.240395
Ncs1:ENSMUST00000000199.7	0.383803	0.373239	0.025974	0.0283019	0.108504	0.238095	0.134831	0.205128
Dmxl1:ENSMUST00000041772.5	0.47923	0.318775	0.311662	0.417837	0.339796	0.45137	0.350372	0.407689
Pabpc1:ENSMUST00000001809.14	0.734824	0.553377	0.597156	0.563786	0.55	0.472826	0.531807	0.526786
N6amt1:ENSMUST00000118115.1	0.477077	0.542971	0.455096	0.47457	0.53598	0.51585	0.521939	0.583326
Lias:ENSMUST00000031101.9	0.123785	0.125873	0.131579	0.127584	0.145156	0.107441	0.110288	0.130596
Ahdc1:ENSMUST00000105916.7	0.696997	0.714296	0.71193	0.729975	0.697439	0.646129	0.704967	0.648235
Snx5:ENSMUST00000028909.4	0.555613	0.45069	0.565271	0.486515	0.522786	0.441056	0.35233	0.498568
Ankrd12:ENSMUST00000038116.12	0.584374	0.611995	0.592658	0.638029	0.632297	0.692118	0.631747	0.613471
Frmpd4:ENSMUST00000238211.1	0.928571	0.759233	0.781246	0.799794	0.841978	0.847482	0.698171	0.760548
Tut7:ENSMUST00000071703.5	0.595846	0.524384	0.229943	0.524444	0.577137	0.448154	0.526484	0.330359
Pgap1:ENSMUST00000097739.4	0.762018	0.689802	0.5831	0.783204	0.747713	0.624646	0.580177	0.536595
Samd4:ENSMUST00000137543.8	0.707306	0.622778	0.626465	0.587331	0.65489	0.606977	0.642588	0.574969
Cmc1:ENSMUST00000044220.10	0.375704	0.185054	0.300765	0.246005	0.214845	0.323028	0.230297	0.308416
Cdk14:ENSMUST00000115451.7	0.877844	0.92417	0.844876	0.787761	0.897314	0.904301	0.873141	0.852246
Rpp21:ENSMUST00000077535.4	0.293561	0.122278	0.160377	0.170213	0.156593	0.148718	0.105737	0.244344
Gm14434:ENSMUST00000120959.7	0.793404	0.755208	0.781492	0.757403	0.760088	0.734313	0.756546	0.808511
Fcho1:ENSMUST00000093444.12	0.332264	0.192216	0.214458	0.10776	0.130708	0.149502	0.156761	0.146427
Celf1:ENSMUST00000068726.12	0.715208	0.718354	0.569846	0.516626	0.56313	0.620411	0.598915	0.6053
Psmd8:ENSMUST00000209034.1	0.66079	0.680385	0.711471	0.690066	0.663743	0.645546	0.661612	0.696017
Larp1:ENSMUST00000178636.1	0.912052	0.765363	0.766026	0.748858	0.790984	0.779264	0.787368	0.781513
Gm14440:ENSMUST00000109051.7	0.73778	0.602575	0.710736	0.531548	0.69313	0.6655	0.518807	0.593323
Ado:ENSMUST00000075686.6	0.711277	0.762463	0.698454	0.714215	0.770281	0.797781	0.719253	0.736166
Chchd5:ENSMUST00000035481.4	0.699387	0.563981	0.554545	0.549451	0.586207	0.551724	0.611321	0.466667
Cct8:ENSMUST00000026704.13	0.208543	0.0273141	0.0457516	0.110843	0.210918	0.080402	0.0510441	0.120879
Csk:ENSMUST00000034863.7	0.903361	0.903315	0.523438	0.75	0.74359	0.810056	0.76338	0.781818
Coa8:ENSMUST00000040519.11	0.505263	0.408284	0.503145	0.378049	0.324786	0.336283	0.327103	0.408451
Ociad1:ENSMUST00000071081.12	0.96131	0.900086	0.495508	0.94824	0.932255	0.929376	0.929873	0.834711
Pgm2l1:ENSMUST00000084935.10	0.622505	0.500713	0.524814	0.502439	0.473449	0.509208	0.519107	0.474808
Cldnd1:ENSMUST00000023426.11	0.684524	0.551985	0.542234	0.606936	0.616197	0.571429	0.54418	0.615385
Rplp2-ps1:ENSMUST00000238938.1	0.644476	0.524697	0.583622	0.521971	0.547835	0.538721	0.491427	0.555692
Mrpl45:ENSMUST00000019026.9	0.268908	0.300493	0.0469799	0.12766	0.198413	0.122302	0.113636	0.102564
Ift20:ENSMUST00000128788.7	0.390449	0.236782	0.373989	0.293315	0.301761	0.247522	0.238619	0.303168
Brd3:ENSMUST00000028282.14	0.248373	0.110537	0.15822	0.164773	0.272555	0.116129	0.119747	0.157732
Lsm12:ENSMUST00000107156.8	0.284065	0.250529	0.161134	0.254806	0.213841	0.243416	0.245804	0.183683
Ybx1:ENSMUST00000079644.12	0.545409	0.557913	0.612014	0.586512	0.575204	0.574636	0.544478	0.5763
Fktn:ENSMUST00000128667.7	0.393314	0.335014	0.227587	0.248877	0.279359	0.284659	0.338021	0.371439
Plppr4:ENSMUST00000061071.12	0.423645	0.307573	0.353123	0.313901	0.306595	0.251248	0.316964	0.295082
Alcam:ENSMUST00000023312.13	0.780344	0.721082	0.714187	0.688056	0.70647	0.72661	0.704429	0.670995
Wdr89:ENSMUST00000062370.8	0.630465	0.517077	0.573978	0.516966	0.543719	0.538267	0.48868	0.55202
Hdgfl3:ENSMUST00000107305.7	0.597743	0.549895	0.505796	0.485782	0.531635	0.540962	0.489802	0.517343
Atp5a1:ENSMUST00000026495.14	0.631401	0.496515	0.588412	0.519074	0.577343	0.546201	0.484509	0.511111
Csrnp3:ENSMUST00000122912.7	0.738076	0.770135	0.728513	0.722381	0.751952	0.761232	0.749012	0.770787
Mrpl49:ENSMUST00000235520.1	0.518777	0.614633	0.594634	0.613735	0.616319	0.614073	0.612909	0.613166
Ap2a2:ENSMUST00000003038.11	0.824219	0.9188	0.925414	0.897887	0.931559	0.945946	0.930792	0.923729
Fam204a:ENSMUST00000065286.1	0.439853	0.442105	0.501131	0.508636	0.54876	0.524295	0.505559	0.486533
Tmod2:ENSMUST00000098552.9	0.284232	0.434021	0.379837	0.348502	0.383234	0.352113	0.383548	0.361751
Mrpl16:ENSMUST00000167199.2	0.0702496	0.244508	0.13737	0.123528	0.135197	0.213929	0.163484	0.095773
Mapk8ip2:ENSMUST00000023291.5	0.253889	0.319333	0.273627	0.312641	0.383857	0.356154	0.38356	0.36065
Ppp1r2:ENSMUST00000060188.13	0.208263	0.269269	0.261027	0.245685	0.271141	0.268946	0.24186	0.233678
Ociad2:ENSMUST00000201908.3	0.306931	0.376942	0.436785	0.36837	0.420638	0.46866	0.41928	0.307554
Dbndd2:ENSMUST00000109349.8	0.333333	0.363128	0.329861	0.362319	0.42963	0.676259	0.513986	0.414815
Rbfox3:ENSMUST00000017576.10	0.629454	0.771322	0.687519	0.665964	0.723192	0.746702	0.741876	0.723297
Gatad2b:ENSMUST00000199754.4	0.584138	0.689583	0.708495	0.683728	0.636536	0.618176	0.69146	0.635624
Aida:ENSMUST00000109166.7	0.118791	0.191009	0.176921	0.154848	0.143588	0.23384	0.190107	0.175448
Ube2i:ENSMUST00000049911.15	0.605805	0.728412	0.709007	0.671921	0.67068	0.718382	0.696874	0.685263
Rgs7bp:ENSMUST00000063551.6	0.332909	0.524376	0.373474	0.39053	0.453402	0.508791	0.472121	0.324802
Tardbp:ENSMUST00000084125.9	0.353036	0.386759	0.421264	0.486882	0.453777	0.473697	0.428135	0.414017
Nans:ENSMUST00000030018.4	0.0871734	0.398174	0.20925	0.181028	0.231705	0.238325	0.118681	0.211115
Kctd16:ENSMUST00000236889.1	0.210773	0.290148	0.309269	0.378753	0.490909	0.410072	0.284848	0.295833
Jpt1:ENSMUST00000021083.6	0.294582	0.364845	0.517308	0.409174	0.357143	0.334347	0.397959	0.35
Eif3j1:ENSMUST00000028668.7	0.223784	0.406265	0.216102	0.26464	0.404836	0.409131	0.262801	0.212446
Stmn2:ENSMUST00000029002.8	0.331822	0.471601	0.406247	0.414267	0.466456	0.441103	0.417381	0.360539
Lsamp:ENSMUST00000099761.9	0.611625	0.749887	0.612223	0.682555	0.735834	0.765295	0.717954	0.611749
Mrpl10:ENSMUST00000001485.9	0.754773	0.843357	0.851848	0.812315	0.862766	0.909037	0.857533	0.877447
1500009L16Rik:ENSMUST00000150459.2	0.628571	0.691265	0.757329	0.743421	0.642105	0.686667	0.757944	0.752747
Sec14l1:ENSMUST00000090433.5	0.75641	0.805369	0.880184	0.893617	0.905747	0.867769	0.9	0.840659
Ccny:ENSMUST00000053917.5	0.26378	0.368787	0.341406	0.31136	0.446703	0.386968	0.304714	0.292461
Kcnc3:ENSMUST00000207493.1	0.65625	0.778195	0.826531	0.726619	0.75592	0.784232	0.703601	0.655556
Glo1:ENSMUST00000236335.1	0.268259	0.379359	0.312149	0.381828	0.355325	0.367816	0.349335	0.293823
Pcdh19:ENSMUST00000149154.7	0.28471	0.398167	0.321429	0.387755	0.407323	0.346939	0.345972	0.373913
Arl4c:ENSMUST00000159814.1	0.472925	0.594429	0.544207	0.534403	0.618174	0.627714	0.566287	0.524352
Glrx2:ENSMUST00000129653.2	0.0742459	0.224764	0.121784	0.163482	0.18408	0.245179	0.168998	0.128713
Ina:ENSMUST00000037636.3	0.497734	0.609091	0.549755	0.587963	0.641711	0.617929	0.607595	0.533803
Pak1:ENSMUST00000033040.11	0.839695	0.950134	0.917665	0.90233	0.920773	0.946293	0.943036	0.880572
Dr1:ENSMUST00000031190.4	0.867647	0.962406	0.986301	0.97561	0.986111	1	0.984962	0.853659
Camk2a:ENSMUST00000102888.9	0.571007	0.576361	0.655329	0.599646	0.61529	0.540918	0.560337	0.583546
Dpp6:ENSMUST00000120555.7	0.0593333	0.0863224	0.110555	0.0837721	0.0608172	0.0799832	0.0650013	0.0571238
Wdr41:ENSMUST00000056512.13	0.791866	0.874665	0.875388	0.891323	0.921055	0.875622	0.859702	0.975
Rab3c:ENSMUST00000167824.2	0.684643	0.704216	0.558933	0.599335	0.720225	0.606854	0.637823	0.538417
Matr3:ENSMUST00000166793.9	0.85	0.969108	0.959144	0.93576	0.943925	0.946197	0.967992	0.918089
Cnnm1:ENSMUST00000165311.2	0.527831	0.629522	0.672316	0.643533	0.523962	0.62117	0.654088	0.671141
Katnal1:ENSMUST00000047257.14	0.486751	0.52993	0.49531	0.53435	0.558369	0.563188	0.539247	0.533945
Med9:ENSMUST00000081980.6	0.257824	0.367355	0.337544	0.310005	0.449704	0.442502	0.377782	0.266022
Scaf1:ENSMUST00000211735.1	0.184049	0.278107	0.309859	0.283019	0.306569	0.25	0.294798	0.322222
Def8:ENSMUST00000065534.9	0.0522876	0.0851064	0.292453	0.113924	0.168539	0.138298	0.162679	0.207547
Atpsckmt:ENSMUST00000161061.2	0.0578512	0.189474	0.0416667	0.125	0.183333	0.302326	0.13	0.136364
Cul3:ENSMUST00000163119.7	0.424998	0.544119	0.504765	0.551095	0.430176	0.494284	0.581048	0.488222
Ptdss1:ENSMUST00000021990.3	0.856	0.954248	0.969849	0.950739	0.972376	0.953216	0.968215	0.972973
Lnpk:ENSMUST00000111993.8	0.318326	0.438074	0.377745	0.38578	0.410031	0.432521	0.466085	0.389386
Syngr1:ENSMUST00000009727.11	0.813084	0.917907	0.888007	0.935912	0.937549	0.958433	0.909914	0.862197
Dynll2:ENSMUST00000178105.2	0.710405	0.822198	0.838869	0.80751	0.830309	0.824692	0.799712	0.794415
Cs:ENSMUST00000005826.8	0.840989	0.957447	0.932862	0.912214	0.960733	0.952255	0.951256	0.927632
Commd5:ENSMUST00000068407.5	0.130435	0.225806	0.198198	0.267606	0.246154	0.22619	0.273256	0.173913
Gm49527:ENSMUST00000230214.1	0.130435	0.225806	0.198198	0.267606	0.246154	0.22619	0.273256	0.173913
Ubap1:ENSMUST00000072866.11	0.726496	0.825532	0.838926	0.827586	0.866071	0.880342	0.826389	0.722222
Slc25a12:ENSMUST00000151937.7	0.213404	0.236066	0.157618	0.185399	0.24567	0.249193	0.219963	0.203992
Nrcam:ENSMUST00000110748.3	0.515775	0.654461	0.482034	0.587793	0.662039	0.667144	0.574475	0.589602
Mrps25:ENSMUST00000140438.1	0.122807	0.169265	0.151994	0.129209	0.163832	0.155561	0.152881	0.139821
Dazap1:ENSMUST00000105362.7	0.574713	0.712644	0.663551	0.642045	0.651042	0.753086	0.710145	0.622378
Tuba4a:ENSMUST00000186213.6	0.519481	0.663653	0.618574	0.493421	0.631313	0.681928	0.628664	0.615385
Ebna1bp2:ENSMUST00000030501.14	0.129909	0.322034	0.145228	0.218107	0.254237	0.246914	0.247059	0.222222
Napb:ENSMUST00000028926.12	0.849819	0.897568	0.891728	0.910085	0.896226	0.889925	0.90314	0.907728
Rora:ENSMUST00000034766.13	0.106381	0.225511	0.184529	0.206331	0.273043	0.23838	0.234265	0.207158
Ilf2:ENSMUST00000001042.9	0.434385	0.571616	0.541679	0.511512	0.514976	0.516798	0.523418	0.548782
Daglb:ENSMUST00000045593.11	0.729167	0.832061	0.822222	0.741379	0.816667	0.826667	0.903448	0.825
Asic1:ENSMUST00000023758.8	0.617143	0.72242	0.8	0.615385	0.703704	0.731183	0.73617	0.717742
Cfap410:ENSMUST00000105397.9	0.35514	0.339623	0.504505	0.435897	0.5	0.540541	0.495283	0.372881
Tcea1:ENSMUST00000165720.2	0.837778	0.891225	0.885538	0.877762	0.87155	0.88309	0.874966	0.887129
Srsf2:ENSMUST00000092404.12	0.666939	0.761803	0.773198	0.753647	0.775301	0.727358	0.740099	0.768161
Derl1:ENSMUST00000022993.6	0.640918	0.791461	0.698984	0.741184	0.753021	0.784188	0.72581	0.7633
Nrxn1:ENSMUST00000072671.13	0.146543	0.386827	0.235656	0.174427	0.178482	0.222061	0.223708	0.297092
Wdr83os:ENSMUST00000140621.1	0.299595	0.374291	0.496746	0.401734	0.45977	0.4	0.334361	0.486911
Hivep3:ENSMUST00000106307.8	0.595294	0.638804	0.660369	0.68036	0.673085	0.685285	0.646485	0.623908
Dctn1:ENSMUST00000113913.7	0.742358	0.852853	0.873684	0.818428	0.865604	0.889353	0.830971	0.817778
Ncoa1:ENSMUST00000085814.4	0.316327	0.442177	0.455238	0.432361	0.334286	0.423077	0.444593	0.353234
Frg1:ENSMUST00000033999.7	0.0494505	0.149606	0.224138	0.109244	0.171717	0.162162	0.162562	0.113924
Ptges3:ENSMUST00000052798.13	0.563605	0.652029	0.584895	0.641524	0.607493	0.684792	0.644043	0.62948
Rab35:ENSMUST00000031492.14	0.259259	0.342424	0.427835	0.36129	0.333333	0.382222	0.364103	0.38843
Cers4:ENSMUST00000008350.15	0.202644	0.256897	0.287151	0.225993	0.230713	0.223841	0.25748	0.251727
Trp53bp1:ENSMUST00000110647.7	0.248485	0.356209	0.336683	0.397516	0.375	0.386905	0.342939	0.298701
Dusp4:ENSMUST00000033930.4	0.703435	0.774023	0.789622	0.714608	0.819769	0.784595	0.785697	0.735928
Atp1b1:ENSMUST00000027863.12	0.72802	0.893083	0.821305	0.795903	0.835995	0.880728	0.848489	0.792573
Tmem191c:ENSMUST00000164950.10	0.758824	0.863111	0.909524	0.853698	0.897004	0.833625	0.857143	0.862213
Rsrc1:ENSMUST00000161726.1	0.637594	0.753581	0.709836	0.67856	0.797264	0.774943	0.743835	0.63978
Dlgap4:ENSMUST00000000094.13	0.4	0.592593	0.488943	0.439153	0.471239	0.472973	0.503303	0.480392
Slc39a3:ENSMUST00000117276.10	0.764398	0.921348	0.864253	0.827068	0.898204	0.930435	0.837037	0.819277
Tenm2:ENSMUST00000102801.7	0.458511	0.563085	0.533278	0.515827	0.530814	0.4964	0.555232	0.480982
Cd47:ENSMUST00000229101.1	0.277875	0.485413	0.349764	0.341516	0.405983	0.41223	0.404767	0.395664
Arxes1:ENSMUST00000057625.2	0.641509	0.734375	0.765714	0.737931	0.775281	0.757895	0.711538	0.783133
Rph3a:ENSMUST00000079204.8	0.766957	0.89707	0.862121	0.865447	0.863075	0.868263	0.887834	0.853357
Pafah1b1:ENSMUST00000021091.14	0.818207	0.916447	0.895753	0.905154	0.916933	0.918425	0.912831	0.862776
Ube4b:ENSMUST00000103212.9	0.584646	0.693879	0.757968	0.698994	0.719154	0.676608	0.687304	0.597842
Tmed5:ENSMUST00000119437.7	0.177359	0.379848	0.162592	0.247979	0.297793	0.31061	0.285254	0.265154
Hnrnpab:ENSMUST00000074669.9	0.312555	0.450335	0.399273	0.419929	0.412835	0.414852	0.415706	0.386355
Psmd5:ENSMUST00000028225.11	0.126965	0.277002	0.260653	0.2586	0.243872	0.278765	0.264113	0.224941
Serinc3:ENSMUST00000017851.3	0.2	0.525424	0.152174	0.311828	0.262821	0.478723	0.315068	0.24
Snx27:ENSMUST00000029783.15	0.522181	0.661189	0.613549	0.581419	0.611635	0.679355	0.623835	0.595252
Scai:ENSMUST00000038874.11	0.811889	0.895912	0.895131	0.956986	0.957186	0.854949	0.91039	0.889335
H2az2:ENSMUST00000109737.8	0.177515	0.250423	0.292169	0.326797	0.295455	0.277143	0.295933	0.284091
Ndufa9:ENSMUST00000205002.2	0.0271941	0.197297	0.163588	0.066838	0.143564	0.155807	0.134228	0.0931373
Socs5:ENSMUST00000041369.7	0.394659	0.425856	0.626866	0.578571	0.597458	0.577519	0.478764	0.491713
Mef2c:ENSMUST00000197722.4	0.280982	0.498308	0.378784	0.423352	0.421724	0.436992	0.416869	0.364608
Hnrnpc:ENSMUST00000111610.11	0.21196	0.28956	0.258264	0.278377	0.312733	0.312374	0.275739	0.273034
Tmem230:ENSMUST00000110164.7	0.651235	0.741573	0.793814	0.771028	0.75	0.777778	0.737609	0.79661
Tspan5:ENSMUST00000029800.8	0.747553	0.911029	0.871717	0.848673	0.882325	0.872754	0.887903	0.878005
Sri:ENSMUST00000088786.10	0.107368	0.349254	0.212389	0.189076	0.157895	0.148571	0.209647	0.186813
Ric3:ENSMUST00000055993.12	0.564595	0.673501	0.65754	0.731504	0.687656	0.773087	0.625639	0.685058
Pld3:ENSMUST00000117095.7	0.0377176	0.0700637	0.219274	0.105169	0.154897	0.248677	0.16869	0.102778
Leo1:ENSMUST00000048937.5	0.0481928	0.232143	0.0875	0.177419	0.103896	0.207792	0.20155	0.0588235
Elfn1:ENSMUST00000050519.7	0.813953	0.89697	1	0.9	0.930769	0.846154	0.929738	0.951542
Insig1:ENSMUST00000059155.10	0.840295	0.941202	0.930315	0.970147	0.914261	0.931097	0.911082	0.964902
Lin7a:ENSMUST00000020057.15	0.649165	0.7457	0.725079	0.744626	0.765387	0.806845	0.712025	0.804074
Jun:ENSMUST00000107094.1	0.376366	0.493529	0.430539	0.356677	0.438445	0.413673	0.504905	0.436564
Mtfr1l:ENSMUST00000102550.9	0.59204	0.681818	0.78534	0.676796	0.670769	0.696078	0.697719	0.747573
Mon1b:ENSMUST00000035777.9	0.783333	0.87	0.949153	0.876543	0.857143	0.967742	0.897959	0.842105
Tox4:ENSMUST00000022766.7	0.415498	0.492368	0.440829	0.453241	0.462526	0.496138	0.498067	0.444169
Ntrk3:ENSMUST00000039431.13	0.283532	0.461474	0.360612	0.368021	0.359002	0.403673	0.397319	0.40971
Elavl2:ENSMUST00000107110.7	0.558011	0.668667	0.622488	0.65454	0.654744	0.652503	0.643982	0.624089
Prpf31:ENSMUST00000008517.12	0.0428571	0.184211	0.25	0.1	0.0833333	0.125	0.155556	0.166667
Vps37a:ENSMUST00000098817.3	0.564403	0.780972	0.682477	0.681356	0.726583	0.773902	0.706306	0.700311
Srsf7:ENSMUST00000063417.10	0.405896	0.53719	0.471429	0.570149	0.518692	0.541237	0.534314	0.454128
Pgp:ENSMUST00000053024.7	0.0750473	0.23672	0.177298	0.142383	0.215788	0.209513	0.177503	0.140524
Nlgn1:ENSMUST00000193603.5	0.325178	0.324929	0.413721	0.398644	0.342199	0.369354	0.40585	0.372892
Ntrk2:ENSMUST00000079828.6	0.397718	0.535682	0.544053	0.488923	0.508039	0.494286	0.517966	0.490223
Slc24a3:ENSMUST00000110007.7	0.333333	0.405436	0.499222	0.451404	0.435185	0.390625	0.449591	0.52988
Faim2:ENSMUST00000023750.8	0.466699	0.593231	0.535813	0.532236	0.61662	0.65957	0.58865	0.550368
Rgs17:ENSMUST00000131996.7	0.0566728	0.15111	0.116998	0.112368	0.102172	0.139229	0.107597	0.103707
Gnai2:ENSMUST00000055704.11	0.494662	0.634744	0.624031	0.553279	0.553488	0.618785	0.61828	0.619289
Gria1:ENSMUST00000036315.15	0.505708	0.714327	0.616946	0.637216	0.643842	0.677929	0.657522	0.639008
Gosr1:ENSMUST00000010536.8	0.83774	0.977671	0.929268	0.925315	1	0.961392	0.925468	1
Mrpl39:ENSMUST00000116584.1	0.031746	0.192308	0.15493	0.0660377	0.241935	0.107143	0.175	0.102941
Maf:ENSMUST00000109104.1	0.355777	0.491314	0.460083	0.534648	0.523523	0.533291	0.431748	0.506625
Smap2:ENSMUST00000043200.7	0.737037	0.895674	0.851675	0.832599	0.835681	0.864583	0.84507	0.755814
Tbc1d9b:ENSMUST00000101270.4	0.0560748	0.12987	0.177419	0.197531	0.177778	0.158192	0.206612	0.104167
Eny2:ENSMUST00000060652.4	0.183206	0.281319	0.22069	0.319672	0.319838	0.381818	0.291592	0.221311
Ppp1r9a:ENSMUST00000035813.8	0.25	0.379233	0.34717	0.357143	0.355263	0.387097	0.377729	0.317073
Ciapin1:ENSMUST00000162538.8	0.00230191	0.0128315	0.0893462	0.0834617	0.0503188	0.0287521	0.0423389	0.0249342
Fam172a:ENSMUST00000091459.11	0.289773	0.445	0.314554	0.376923	0.4	0.482759	0.47549	0.354167
Slco3a1:ENSMUST00000026897.13	0.205883	0.370066	0.388106	0.266185	0.31761	0.263673	0.33007	0.192474
Ptrhd1:ENSMUST00000179139.2	0.247588	0.392442	0.411043	0.350427	0.39645	0.31016	0.342163	0.322368
Ywhaq:ENSMUST00000155480.8	0.176159	0.307145	0.287806	0.267667	0.270572	0.286274	0.279973	0.239632
Slc25a44:ENSMUST00000168755.6	0.565836	0.726766	0.6875	0.635983	0.681159	0.69697	0.677419	0.57971
Ppp1cc:ENSMUST00000102528.10	0.837991	0.921545	0.882493	0.892764	0.897371	0.92284	0.900301	0.885077
Shoc2:ENSMUST00000025932.8	0.598245	0.662365	0.664315	0.610428	0.682777	0.646654	0.624941	0.656706
Slc35g2:ENSMUST00000093792.3	0.0348849	0.234584	0.151866	0.0939455	0.165008	0.248206	0.140553	0.0631699
Ttyh1:ENSMUST00000129423.7	0.324807	0.414902	0.369505	0.416561	0.390272	0.435365	0.411024	0.392751
Sorl1:ENSMUST00000060989.8	0.541768	0.709353	0.645986	0.580524	0.575272	0.686592	0.576482	0.694726
Ankrd13c:ENSMUST00000040787.12	0.744414	0.848416	0.827094	0.872371	0.874525	0.878061	0.860098	0.891567
Osbpl9:ENSMUST00000084366.12	0.672727	0.809278	0.764151	0.762887	0.846626	0.757143	0.773333	0.824561
Usp47:ENSMUST00000210309.1	0.725	0.827869	0.836207	0.878505	0.813953	0.849206	0.852814	0.87013
Ogfrl1:ENSMUST00000027343.5	0.120016	0.325873	0.217948	0.219457	0.232379	0.285057	0.23581	0.230744
Fndc3a:ENSMUST00000089017.11	0.837838	0.961905	1	1	0.923077	0.952381	0.927928	1
Cadm2:ENSMUST00000114292.7	0.508216	0.651831	0.598624	0.687645	0.629414	0.693957	0.652949	0.603884
Ndnf:ENSMUST00000054351.5	0.701109	0.82677	0.78917	0.686249	1	1	0.815798	0.911895
Far1:ENSMUST00000033018.14	0.57136	0.66245	0.647579	0.707226	0.661258	0.664024	0.676444	0.669437
Zfand3:ENSMUST00000226208.2	0.694656	0.83913	0.84466	0.790698	0.836735	0.847059	0.732955	0.86
Maco1:ENSMUST00000030628.14	0.464516	0.623656	0.554054	0.5625	0.54955	0.584	0.596226	0.569767
Ube2n:ENSMUST00000099329.4	0.158641	0.32687	0.205553	0.215368	0.325273	0.376206	0.240239	0.20553
Ccdc88a:ENSMUST00000040182.12	0.380213	0.382463	0.39801	0.407488	0.431066	0.482242	0.440957	0.424905
Prnp:ENSMUST00000091288.12	0.730978	0.89434	0.826404	0.84178	0.86	0.825342	0.85936	0.839248
Czib:ENSMUST00000106727.9	0.0513699	0.242574	0.162698	0.203593	0.125786	0.131579	0.209836	0.0943396
Copg1:ENSMUST00000113607.9	0.684597	0.839065	0.763466	0.769036	0.786408	0.846011	0.809969	0.730769
Mcl1:ENSMUST00000037947.14	0.773359	0.910687	0.904376	0.927237	0.873987	0.917259	0.892362	0.845379
Scp2:ENSMUST00000030340.14	0.271154	0.4125	0.467836	0.448357	0.333333	0.328877	0.371601	0.391813
Mrpl3:ENSMUST00000035177.14	0.00675676	0.236559	0.148387	0.0294118	0.113636	0.164948	0.0751174	0.0444444
Cnot4:ENSMUST00000044163.9	0.425349	0.524601	0.432389	0.517706	0.495653	0.551619	0.527208	0.432696
Spring1:ENSMUST00000049138.7	0.0906161	0.258955	0.220967	0.133992	0.241499	0.194844	0.212391	0.178216
Psmd11:ENSMUST00000017572.13	0.190769	0.428377	0.236636	0.292531	0.264214	0.301146	0.347721	0.2441
Snw1:ENSMUST00000021428.8	0.51049	0.647482	0.682759	0.617886	0.606742	0.640449	0.606195	0.631579
Rbm39:ENSMUST00000109587.8	0.807692	0.952862	0.925581	0.955056	0.929348	0.929936	0.904459	0.910569
Pcmt1:ENSMUST00000159917.7	0.404973	0.504131	0.532928	0.53036	0.55328	0.578673	0.537024	0.521067
Gosr2:ENSMUST00000021329.13	0.609195	0.777891	0.697865	0.701564	0.69812	0.733293	0.782318	0.689585
Ccnd2:ENSMUST00000000188.11	0.285826	0.462352	0.32539	0.393579	0.512785	0.407173	0.425568	0.380086
Pcnp:ENSMUST00000114444.8	0.630835	0.773324	0.694348	0.753534	0.786872	0.773606	0.726858	0.69843
Mecp2:ENSMUST00000100750.9	0.834223	0.898111	0.814077	0.855319	0.896529	0.848023	0.899806	0.888021
Celf4:ENSMUST00000115816.2	0.318288	0.376308	0.399911	0.358456	0.335692	0.36508	0.36089	0.39319
Gclm:ENSMUST00000029769.13	0.190714	0.462483	0.267721	0.288704	0.337441	0.351824	0.346809	0.325526
Tmem41b:ENSMUST00000094097.11	0.302686	0.435766	0.483216	0.393134	0.518039	0.480105	0.410346	0.446379
Ipo7:ENSMUST00000084731.4	0.083735	0.130673	0.167544	0.164373	0.167691	0.117828	0.118819	0.15163
Sec11a:ENSMUST00000026818.11	0.300518	0.379562	0.502646	0.351852	0.366972	0.444444	0.456446	0.403509
Nudt3:ENSMUST00000025050.12	0.748252	0.904054	0.800866	0.85213	0.889855	0.906166	0.871329	0.853659
Gm49804:ENSMUST00000233710.1	0.748252	0.904054	0.800866	0.85213	0.889855	0.906166	0.871329	0.853659
Sucla2:ENSMUST00000160507.7	0.44697	0.53719	0.52	0.559406	0.524336	0.649203	0.593824	0.566372
Cit:ENSMUST00000051704.14	0.372449	0.522042	0.508264	0.525	0.496829	0.446957	0.483622	0.562791
Smim13:ENSMUST00000165561.3	0.501695	0.712583	0.637097	0.593472	0.630112	0.598191	0.593368	0.608466
Bcat1:ENSMUST00000032402.11	0.0942249	0.159292	0.213816	0.25	0.286645	0.239264	0.218263	0.21875
Tex261:ENSMUST00000014892.7	0.26264	0.440887	0.337729	0.337345	0.369169	0.364773	0.338455	0.375715
Ciao1:ENSMUST00000174030.7	0.0623808	0.271153	0.218808	0.203221	0.222113	0.220732	0.159418	0.134296
Itfg1:ENSMUST00000034140.8	0.767943	0.910497	0.872388	0.869336	0.857428	0.89525	0.879986	0.786477
Arid1a:ENSMUST00000145664.8	0.236364	0.400402	0.371166	0.375394	0.302198	0.307339	0.356371	0.33945
Mrpl43:ENSMUST00000097715.3	0.287678	0.382304	0.345071	0.338315	0.338159	0.381539	0.417385	0.356503
Actr1b:ENSMUST00000043951.9	0.453488	0.593486	0.484802	0.5	0.631933	0.67916	0.577644	0.512195
Fam217b:ENSMUST00000094251.10	0.431111	0.604839	0.583012	0.51462	0.583333	0.509728	0.51487	0.607595
Timm8a1:ENSMUST00000054213.4	0.769565	0.868966	0.923767	0.861538	0.888268	0.902564	0.913706	0.891304
Ubqln1:ENSMUST00000058735.11	0.788462	0.933464	0.839623	0.921397	0.915584	0.955182	0.910017	0.845528
Celf2:ENSMUST00000170438.7	0.419233	0.442049	0.4377	0.432609	0.430881	0.402826	0.421886	0.410649
Uqcc1:ENSMUST00000109632.7	0.710236	0.856747	0.817462	0.783275	0.80068	0.842261	0.815225	0.760392
Meaf6:ENSMUST00000154689.7	0.0910816	0.238095	0.155894	0.185596	0.312	0.315615	0.199719	0.188073
Eid1:ENSMUST00000164756.3	0.614458	0.782805	0.724868	0.717608	0.744856	0.744108	0.729567	0.762162
Ppm1a:ENSMUST00000021514.9	0.0997778	0.261353	0.222101	0.246856	0.220239	0.220746	0.200306	0.247326
Ssb:ENSMUST00000166411.7	0.133438	0.244042	0.228577	0.209155	0.195256	0.269036	0.21715	0.254329
Rabepk:ENSMUST00000145903.7	0.0790109	0.220955	0.181603	0.16299	0.201211	0.219586	0.186124	0.181835
Galnt14:ENSMUST00000024858.11	0.094491	0.215254	0.137733	0.178305	0.203497	0	0.207057	0.14934
Hgsnat:ENSMUST00000037609.7	0.224985	0.344181	0.406243	0.36601	0.354664	0.494531	0.326122	0.207767
Ankrd37:ENSMUST00000053558.9	0.77027	0.867347	0.920455	0.931034	0.878981	0.906667	0.905109	0.895833
Nceh1:ENSMUST00000046515.14	0.497812	0.766996	0.544074	0.495338	0.560481	0.718832	0.642059	0.521934
Fkbp1a:ENSMUST00000044011.11	0.618051	0.725778	0.792431	0.750117	0.72344	0.716957	0.751039	0.745509
Cul2:ENSMUST00000162301.7	0.113636	0.276074	0.2	0.213592	0.212121	0.242991	0.266667	0.264151
Ppp2ca:ENSMUST00000020608.2	0.100185	0.149058	0.128522	0.140003	0.191679	0.158441	0.137655	0.12972
Stx6:ENSMUST00000027743.12	0.175642	0.256102	0.237506	0.191792	0.329091	0.239191	0.209339	0.252945
Pdhx:ENSMUST00000011058.8	0.678899	0.894737	0.78125	0.739394	0.831731	0.763158	0.828571	0.716418
Apip:ENSMUST00000011055.6	0.0641026	0.195402	0.140788	0.222222	0.16129	0.26087	0.210227	0.151515
Amer2:ENSMUST00000022561.8	0.131684	0.332002	0.185335	0.231959	0.333689	0.345133	0.240975	0.203957
Asxl1:ENSMUST00000227428.1	0.813016	0.895505	0.880557	0.864927	0.854223	0.861021	0.89992	0.863908
Ivns1abp:ENSMUST00000023918.12	0.761364	0.903226	0.923529	0.862069	0.92069	0.889313	0.85034	0.894737
Aasdhppt:ENSMUST00000051589.8	0.116041	0.329648	0.195592	0.163545	0.307975	0.338569	0.288887	0.223595
Rab27b:ENSMUST00000121693.7	0.294487	0.480124	0.4323	0.378333	0.467441	0.422973	0.416408	0.358886
Fstl5:ENSMUST00000038364.14	0.716535	0.879276	0.771429	0.916667	0.841176	0.92	0.778947	0.819277
Nub1:ENSMUST00000068825.7	0.603465	0.771364	0.713531	0.663001	0.686341	0.744294	0.758071	0.615459
Ptrh2:ENSMUST00000108022.7	0.0574163	0.19685	0.269231	0.142857	0.191176	0.3	0.153005	0.0909091
Homer2:ENSMUST00000098326.2	0.0166764	0.182323	0.138107	0.118066	0.106396	0.13194	0.127701	0.210292
Thoc2l:ENSMUST00000239307.2	0.563852	0.681537	0.689303	0.696878	0.710674	0.677759	0.716496	0.696415
Brd7:ENSMUST00000034085.7	0.0851873	0.220612	0.188783	0.142613	0.147534	0.246107	0.213973	0.221403
Sbds:ENSMUST00000026387.10	0.522523	0.66474	0.67382	0.625	0.572727	0.658915	0.657993	0.673267
Pak3:ENSMUST00000172330.2	0.243857	0.427956	0.377459	0.3517	0.367719	0.390592	0.359076	0.265384
Ctnnbl1:ENSMUST00000029178.6	0	0.163639	0.0822943	0.14813	0.0892877	0.106572	0.120392	0.0671008
Ppp1r7:ENSMUST00000027494.10	0.13547	0.227961	0.223472	0.224869	0.181	0.210326	0.153835	0.171428
Vps4a:ENSMUST00000034388.9	0.754579	0.926829	0.879668	0.868571	0.85514	0.858238	0.887833	0.892308
Prkcz:ENSMUST00000103178.10	0.116525	0.222962	0.244813	0.274194	0.313531	0.270627	0.218487	0.237288
Lman2:ENSMUST00000021940.7	0.471758	0.651795	0.550507	0.486616	0.621164	0.684307	0.650963	0.454559
Nfx1:ENSMUST00000091614.6	0.102619	0.225827	0.202216	0.231755	0.212389	0.210305	0.301236	0.124082
Mkln1:ENSMUST00000026699.14	0.426549	0.523408	0.518146	0.585587	0.585778	0.590955	0.539361	0.562767
Taz:ENSMUST00000124200.7	0.164129	0.361705	0.256502	0.280458	0.230035	0.330204	0.412082	0.26169
Mfap1b:ENSMUST00000056732.3	0.26697	0.368697	0.367405	0.36018	0.347412	0.355544	0.349524	0.329532
Mark1:ENSMUST00000027929.9	0.590062	0.764706	0.693878	0.618182	0.660606	0.815951	0.75	0.625
Nip7:ENSMUST00000034392.12	0.0663022	0.116545	0.119182	0.108511	0.16248	0.161287	0.138609	0.150903
Satb1:ENSMUST00000144331.7	0.181816	0.215407	0.268581	0.493169	0.225181	0.336297	0.328909	0.266073
Pakap:ENSMUST00000102903.7	0.422926	0.570393	0.454127	0.508406	0.537083	0.593473	0.557683	0.389294
Pura:ENSMUST00000051301.5	0.107949	0.185439	0.163198	0.162958	0.171123	0.152297	0.149595	0.156171
Gspt1:ENSMUST00000167571.7	0.691166	0.857356	0.813861	0.870187	0.862804	0.870979	0.817804	0.84208
Rbfox2:ENSMUST00000171751.9	0.337828	0.518265	0.46275	0.418026	0.5094	0.481524	0.43355	0.364255
Ppp2r5c:ENSMUST00000221074.1	0.798158	0.724177	0.787246	0.778187	0.862573	0.734506	0.754202	0.698969
Exoc7:ENSMUST00000106411.9	0.123574	0.322204	0.247137	0.221808	0.156385	0.250397	0.269702	0.191009
Peli1:ENSMUST00000093290.11	0.281818	0.503759	0.339286	0.402878	0.340426	0.277778	0.474684	0.435484
Exoc4:ENSMUST00000052266.14	0.466667	0.577358	0.640845	0.594203	0.572289	0.605263	0.6139	0.595745
Krr1:ENSMUST00000163048.7	0.3077	0.416183	0.31947	0.408879	0.410266	0.36114	0.362598	0.361411
Clcn3:ENSMUST00000056508.11	0.653177	0.847878	0.715912	0.771796	0.752749	0.810514	0.775542	0.74757
Thoc3:ENSMUST00000026990.5	0.201278	0.362791	0.273743	0.227273	0.323741	0.401515	0.368675	0.327586
Plppr5:ENSMUST00000239347.1	0.560312	0.746092	0.556201	0.607244	0.671982	0.84961	0.70636	0.609077
Pten:ENSMUST00000013807.7	0.174178	0.376584	0.25036	0.283541	0.34675	0.343138	0.281615	0.251415
Srsf6:ENSMUST00000130411.6	0.129032	0.311765	0.207254	0.25	0.316239	0.30303	0.255208	0.197368
Mettl1:ENSMUST00000120542.7	0.160017	0.278372	0.231793	0.175729	0.339381	0.364302	0.242011	0.18297
Gpr12:ENSMUST00000036211.7	0.147003	0.370718	0.230792	0.245098	0.255306	0.308514	0.22012	0.157905
Ankrd50:ENSMUST00000094300.3	0.442171	0.568729	0.576445	0.648441	0.646107	0.647359	0.577866	0.571887
Efcab14:ENSMUST00000106525.8	0.390651	0.558239	0.427797	0.354633	0.566218	0.587922	0.502241	0.351944
Gprc5b:ENSMUST00000008878.9	0.767857	0.821705	0.916667	0.857143	0.93578	0.955882	0.854271	0.851852
Cxxc5:ENSMUST00000060722.7	0.632877	0.770588	0.765027	0.696429	0.790441	0.806962	0.780374	0.684783
Armcx3:ENSMUST00000086884.4	0.624434	0.8	0.717314	0.767857	0.77551	0.79558	0.749104	0.727273
Hnrnpdl:ENSMUST00000128187.7	0.400521	0.580247	0.530806	0.534715	0.540963	0.575793	0.505679	0.511092
Ppfia4:ENSMUST00000168515.7	0.440945	0.507795	0.564356	0.576037	0.689516	0.591928	0.575107	0.593407
Tfam:ENSMUST00000092430.10	0.139535	0.393258	0.27193	0.202899	0.275	0.2875	0.251908	0.176471
Shfl:ENSMUST00000043911.7	0.285487	0.407383	0.462491	0.397929	0.524476	0.427536	0.360076	0.42954
Lyrm9:ENSMUST00000147875.8	0.264645	0.367431	0.38026	0.366579	0.441698	0.499075	0.456054	0.396166
Atg13:ENSMUST00000076803.11	0.481928	0.602694	0.668478	0.633094	0.674074	0.654054	0.578275	0.493506
Wipi2:ENSMUST00000036872.15	0.685132	0.856532	0.805966	0.819738	0.835247	0.8554	0.85136	0.798814
Pnma2:ENSMUST00000089236.10	0.26714	0.443977	0.301726	0.311719	0.31743	0.377729	0.371807	0.346219
Dcaf7:ENSMUST00000058438.8	0.843373	0.971119	0.992754	0.975248	0.986395	0.983122	0.985689	0.952381
Trim37:ENSMUST00000041282.12	0.690299	0.672673	0.834025	0.862816	0.914773	0.904523	0.87234	0.817073
Igf1r:ENSMUST00000005671.9	0.623579	0.759385	0.772429	0.788012	0.749002	0.780713	0.74546	0.766366
Cln8:ENSMUST00000027554.7	0.3353	0.502542	0.483753	0.519605	0.655754	0.602926	0.482072	0.441517
Vamp4:ENSMUST00000135241.7	0.266484	0.54417	0.238806	0.373206	0.381818	0.45977	0.351786	0.325792
Bptf:ENSMUST00000057892.14	0.140046	0.246472	0.266058	0.219481	0.24324	0.2789	0.269024	0.296136
Arl4a:ENSMUST00000146905.1	0.0620155	0.192708	0.176	0.225	0.237288	0.238095	0.190789	0.194444
Gorasp1:ENSMUST00000035099.8	0.108979	0.22078	0.268994	0.225522	0.218994	0.3003	0.266272	0.179158
Ran:ENSMUST00000031383.13	0.0985294	0.27514	0.20904	0.170058	0.272566	0.328542	0.256213	0.151515
Maip1:ENSMUST00000027114.5	0.0727273	0.212389	0.176471	0.104478	0.339623	0.253731	0.205479	0.0851064
Mtmr7:ENSMUST00000048898.16	0.235748	0.342999	0.267489	0.252467	0.300005	0.314702	0.332181	0.333562
Gopc:ENSMUST00000105475.8	0.532469	0.757359	0.612556	0.708577	0.670493	0.706883	0.609491	0.722178
Arl5a:ENSMUST00000036541.7	0.809798	0.816188	0.714309	0.79681	0.876429	0.802389	0.713106	0.723835
Kcnj9:ENSMUST00000062387.7	0.64817	0.806456	0.753057	0.751874	0.67853	0.795716	0.788114	0.708951
Keap1:ENSMUST00000194542.5	0.450749	0.630556	0.625285	0.545833	0.574755	0.604001	0.578544	0.524089
Ankrd39:ENSMUST00000194894.3	0.244444	0.309353	0.482143	0.409836	0.333333	0.380952	0.407143	0.439024
Dnajc10:ENSMUST00000028392.7	0.3239	0.424374	0.442953	0.492015	0.492549	0.469177	0.471057	0.378487
Optn:ENSMUST00000114996.7	0.0704225	0.210526	0.228571	0.0666667	0.235294	0.180556	0.24	0.185185
Atg4b:ENSMUST00000027502.15	0.303446	0.41676	0.346068	0.369454	0.42462	0.452386	0.414243	0.374478
Comt:ENSMUST00000165430.7	0.279116	0.30933	0.353368	0.310619	0.349618	0.319168	0.290547	0.31925
Ubxn2a:ENSMUST00000020962.11	0.524651	0.622951	0.524126	0.577942	0.56964	0.572636	0.555014	0.559917
Pcdh17:ENSMUST00000071370.6	0.385831	0.500082	0.49697	0.407128	0.453718	0.489088	0.474759	0.483047
Tmem106b:ENSMUST00000031556.13	0.784455	0.934181	0.883321	0.923495	0.940093	0.94367	0.936575	0.880039
Dnajc18:ENSMUST00000025208.6	0.807018	0.961957	0.943231	0.932127	0.965217	0.967742	0.940887	0.897196
Letmd1:ENSMUST00000037001.9	0.756757	0.90991	0.885417	0.924242	0.88	0.862069	0.913386	0.846154
Ccnh:ENSMUST00000022030.10	0.547256	0.759848	0.590027	0.648381	0.553327	0.758938	0.692844	0.554368
Psmf1:ENSMUST00000042452.10	0.21118	0.495935	0.328125	0.254902	0.307692	0.265306	0.423611	0.2
Adrb1:ENSMUST00000038949.5	0.17276	0.275411	0.441171	0.285671	0.363488	0.352935	0.267527	0.27319
Fbxo33:ENSMUST00000043204.7	0.36036	0.53616	0.430939	0.55102	0.461883	0.486301	0.513889	0.5
Hnrnpul2:ENSMUST00000096753.4	0.622732	0.754541	0.72034	0.747445	0.755622	0.74195	0.739065	0.764317
Akirin2:ENSMUST00000084299.5	0.222147	0.351424	0.402262	0.367906	0.307589	0.403457	0.371345	0.350955
Cnot2:ENSMUST00000168036.7	0.698638	0.875669	0.886376	0.796253	0.880718	0.806111	0.811927	0.847493
Atp6v1a:ENSMUST00000114666.8	0.422374	0.590426	0.555241	0.526276	0.579982	0.574586	0.563485	0.524922
Tmem248:ENSMUST00000065329.12	0.686047	0.891892	0.834862	0.781818	0.861538	0.813559	0.791367	0.794872
Vsnl1:ENSMUST00000220506.1	0.5918	0.747587	0.716725	0.735287	0.669839	0.731521	0.77345	0.705434
Pdcd6ip:ENSMUST00000035086.12	0.581806	0.761217	0.580399	0.653333	0.785243	0.863376	0.7313	0.52459
Atp2b3:ENSMUST00000088429.7	0.350971	0.444236	0.432946	0.384519	0.43859	0.427036	0.410399	0.445392
Atad1:ENSMUST00000235412.1	0.465936	0.642643	0.678546	0.572422	0.546523	0.627139	0.553781	0.609106
Asph:ENSMUST00000146441.7	0.25138	0.620011	0.342075	0.359644	0.414482	0.489018	0.435019	0.489459
Grid1:ENSMUST00000043349.6	0.197149	0.371758	0.288612	0.366566	0.388068	0.407195	0.283064	0.26943
Mgat2:ENSMUST00000060579.9	0.575133	0.768608	0.819598	0.706552	0.685658	0.72172	0.637378	0.718702
H13:ENSMUST00000089059.8	0.0900077	0.337304	0.24093	0.166975	0.197491	0.223242	0.214236	0.172379
Lrpap1:ENSMUST00000030986.14	0.120653	0.329281	0.242243	0.223285	0.279232	0.309021	0.272769	0.160796
Rnf6:ENSMUST00000161859.7	0.303704	0.480363	0.478528	0.373391	0.411765	0.471366	0.448276	0.449153
Ppt1:ENSMUST00000030412.10	0.638077	0.777824	0.746424	0.813731	0.86242	0.845824	0.740753	0.777992
Washc1:ENSMUST00000072383.13	0.137255	0.429448	0.307087	0.280899	0.28169	0.181818	0.179191	0.253731
Pja2:ENSMUST00000172818.7	0.539726	0.757557	0.636364	0.647687	0.64	0.693271	0.703758	0.541262
Dnaja4:ENSMUST00000070070.7	0.390805	0.463158	0.577586	0.5	0.580645	0.473684	0.591549	0.485714
Csnk1e:ENSMUST00000117786.7	0.467886	0.695394	0.619482	0.568155	0.602795	0.644553	0.598024	0.547801
Mras:ENSMUST00000035045.14	0.692771	0.848875	0.824074	0.785047	0.833333	0.844444	0.861702	0.785714
Armc1:ENSMUST00000029125.9	0.306489	0.492685	0.368253	0.402028	0.472844	0.469707	0.426098	0.440773
Nars:ENSMUST00000237400.1	0.676301	0.856426	0.812165	0.776824	0.765914	0.859375	0.819056	0.830435
Eif5:ENSMUST00000166123.8	0.514273	0.715105	0.649486	0.628883	0.664453	0.653195	0.666141	0.629168
Stx7:ENSMUST00000220041.1	0.648148	0.787524	0.764706	0.818015	0.781377	0.830247	0.801339	0.75641
Cntn1:ENSMUST00000169825.7	0.473976	0.639881	0.605564	0.627395	0.609575	0.676397	0.635171	0.604542
Eps15:ENSMUST00000102729.9	0.729006	0.913279	0.892915	0.903013	0.892766	0.908674	0.881819	0.864684
Ghitm:ENSMUST00000165649.3	0.561528	0.710409	0.663163	0.675981	0.679256	0.71996	0.677452	0.591591
Akap6:ENSMUST00000095737.4	0.445125	0.439531	0.412251	0.415972	0.502034	0.485002	0.39208	0.413705
Hnrnpk:ENSMUST00000116403.8	0.45207	0.676836	0.581551	0.560886	0.624204	0.648045	0.59475	0.495202
Btbd1:ENSMUST00000026093.8	0.696078	0.843813	0.903158	0.844221	0.846667	0.8125	0.825	0.795812
Timm10b:ENSMUST00000106783.7	0.245444	0.267178	0.221839	0.275285	0.303337	0.316564	0.295064	0.269387
Cxxc4:ENSMUST00000181904.2	0.311218	0.523583	0.430662	0.376271	0.513741	0.412149	0.440716	0.448365
Slc38a1:ENSMUST00000088454.12	0.435179	0.629646	0.56797	0.491581	0.6055	0.616012	0.560473	0.615664
Bnip3l:ENSMUST00000111115.7	0.0906631	0.330081	0.194969	0.195274	0.268212	0.263254	0.2403	0.162162
Abi1:ENSMUST00000126112.7	0.47251	0.537072	0.50322	0.480323	0.543896	0.585245	0.548429	0.530951
Gstz1:ENSMUST00000063117.9	0.465649	0.675325	0.595506	0.493976	0.69697	0.592105	0.579618	0.653061
Atp8a1:ENSMUST00000135930.7	0.691529	0.716647	0.803724	0.75937	0.744059	0.780904	0.739251	0.789804
Rbms3:ENSMUST00000111773.9	0.378226	0.364505	0.359297	0.352267	0.358537	0.388118	0.351932	0.327864
Ttc39c:ENSMUST00000234255.1	0.0981415	0.369991	0.213642	0.264274	0.251058	0.231796	0.197387	0.428296
Gnb4:ENSMUST00000155737.7	0.138855	0.30854	0.248286	0.208449	0.319551	0.2759	0.223788	0.188746
Ogt:ENSMUST00000044475.4	0.712121	0.773756	0.916129	0.83	0.875	0.911504	0.880829	0.892857
Lix1:ENSMUST00000115576.2	0.375787	0.548143	0.468875	0.439748	0.345915	0.5	0.639001	0.448453
Anxa7:ENSMUST00000065504.16	0.391304	0.520362	0.544444	0.534161	0.554054	0.555556	0.55988	0.5
Taf12:ENSMUST00000030731.10	0.190071	0.222426	0.173896	0.201229	0.20073	0.226312	0.196764	0.241573
Btbd9:ENSMUST00000168787.7	0.341629	0.591046	0.401281	0.445975	0.541068	0.493103	0.481396	0.399276
Arih2:ENSMUST00000013338.13	0.663462	0.769784	0.83908	0.793651	0.92	0.84507	0.827338	0.727273
Lrrc8d:ENSMUST00000060531.15	0.330935	0.450172	0.390476	0.431818	0.580247	0.547619	0.522727	0.678571
Akap8:ENSMUST00000002699.6	0.590349	0.78821	0.86706	0.693633	0.79027	0.714153	0.752299	0.553743
Hnrnpd:ENSMUST00000172361.7	0.28999	0.499437	0.453957	0.522205	0.577413	0.558264	0.533554	0.507966
Lgals8:ENSMUST00000124888.7	0.670149	0.866085	0.919199	0.780473	0.881925	0.923822	0.802326	0.777785
Ddx3x:ENSMUST00000000804.6	0.564356	0.723988	0.724044	0.669811	0.680556	0.762943	0.705426	0.771277
Nudt5:ENSMUST00000026927.9	0.0324675	0.278351	0.138889	0.109375	0.164179	0.188679	0.194175	0.166667
Rbm8a2:ENSMUST00000104983.1	0.446923	0.442223	0.569085	0.495918	0.461385	0.407529	0.456712	0.4963
Tpd52l2:ENSMUST00000149163.7	0.126911	0.266143	0.249973	0.202652	0.30846	0.31204	0.277387	0.285914
Erbb4:ENSMUST00000119142.7	0.805734	0.886626	0.907302	0.927409	0.932056	0.916676	0.912333	0.890837
Tagap:ENSMUST00000036370.7	0.59434	0.780899	0.743421	0.739837	0.632911	0.848921	0.758893	0.697368
Adgrl3:ENSMUST00000120128.7	0.141558	0.2489	0.295565	0.288857	0.285625	0.385559	0.234385	0.270744
Zfyve9:ENSMUST00000106658.7	0.100825	0.153941	0.178508	0.111735	0.184693	0.218481	0.215874	0.21917
Etf1:ENSMUST00000025218.7	0.462734	0.697465	0.618009	0.61224	0.614603	0.594425	0.651087	0.644466
Map1lc3b:ENSMUST00000034270.16	0.67927	0.797966	0.828935	0.847813	0.82781	0.852738	0.848036	0.820426
Ptpra:ENSMUST00000028769.13	0	0.181818	0.162887	0.131902	0.184426	0.0904762	0.158562	0.131429
Nap1l1:ENSMUST00000065917.15	0.368982	0.514449	0.519832	0.481943	0.557185	0.671626	0.540674	0.456424
Btrc:ENSMUST00000065601.12	0.402785	0.640549	0.471776	0.552779	0.549346	0.607043	0.600974	0.487992
Prkar1a:ENSMUST00000106677.7	0.736938	0.916788	0.808421	0.850769	0.896683	0.926128	0.901845	0.859824
Nr1d2:ENSMUST00000090543.5	0.719298	0.920732	0.930556	0.91453	0.943548	0.805031	0.818182	0.869565
Ckap4:ENSMUST00000053871.4	0.559783	0.763889	0.725352	0.778846	0.736527	0.725	0.639752	0.692308
Rab33b:ENSMUST00000054387.7	0.535118	0.693136	0.741755	0.673512	0.668662	0.728902	0.717559	0.72894
Dapk1:ENSMUST00000077453.12	0.45	0.64467	0.565714	0.576923	0.546154	0.661538	0.626223	0.575
Dnajb1:ENSMUST00000005620.9	0.669065	0.798046	0.862944	0.77665	0.852564	0.871658	0.819797	0.837209
Emc7:ENSMUST00000069747.5	0.0434298	0.23951	0.120983	0.163968	0.192157	0.331111	0.200391	0.134146
Limk2:ENSMUST00000110029.8	0.445716	0.639405	0.620219	0.654961	0.684469	0.644482	0.606852	0.616489
Fbxo28:ENSMUST00000051431.9	0.484858	0.673494	0.599706	0.675013	0.668198	0.645308	0.607727	0.53507
Coq5:ENSMUST00000040421.10	0.404599	0.606829	0.569987	0.589441	0.565911	0.629724	0.567818	0.601152
Wdr77:ENSMUST00000010278.11	0.36453	0.57291	0.422324	0.394526	0.550314	0.599284	0.463325	0.502516
Col19a1:ENSMUST00000115244.8	0.175419	0.334621	0.404762	0.318841	0.301115	0.442478	0.314031	0.345745
Timp2:ENSMUST00000017610.9	0.69889	0.882352	0.84021	0.856344	0.908267	0.886921	0.847877	0.834197
Faf2:ENSMUST00000126071.8	0.455577	0.67843	0.560122	0.602074	0.673312	0.584523	0.563755	0.542104
Ryk:ENSMUST00000035142.7	0.15	0.333333	0.625	0.209302	0.223684	0.350649	0.185897	0.311475
Vldlr:ENSMUST00000167487.7	0.455984	0.625441	0.548992	0.506526	0.590476	0.592574	0.545319	0.581115
Cnr1:ENSMUST00000057188.6	0.804959	0.973692	0.921933	0.879397	0.913551	0.961864	0.925551	0.92096
Zdhhc9:ENSMUST00000037960.10	0.0925926	0.241379	0.23913	0.192308	0.306818	0.255814	0.309211	0.140845
Otub1:ENSMUST00000025679.10	0.645946	0.880645	0.798995	0.662116	0.772926	0.8	0.836217	0.716495
Coa7:ENSMUST00000131656.1	0.0922943	0.253219	0.186806	0.142815	0.139545	0.21714	0.172242	0.23909
Acat1:ENSMUST00000034547.5	0.133333	0.366255	0.310078	0.252788	0.217778	0.318182	0.310945	0.24812
Sgcb:ENSMUST00000081170.8	0.492551	0.706553	0.584046	0.569601	0.7131	0.677984	0.666759	0.615089
Tnfaip8l3:ENSMUST00000098760.4	0.17955	0.256061	0.449024	0.346491	0.430624	0.594972	0.259985	0.242026
Mfsd5:ENSMUST00000051341.5	0.538462	0.708108	0.818182	0.657407	0.68	0.651685	0.668367	0.74
Emc8:ENSMUST00000181950.1	0.169082	0.450777	0.221374	0.234234	0.379845	0.383178	0.326446	0.194444
Vti1a:ENSMUST00000223690.1	0.534567	0.693454	0.60655	0.591013	0.695143	0.720147	0.6701	0.607897
Rufy3:ENSMUST00000031229.10	0.526093	0.694482	0.666954	0.648681	0.702174	0.736012	0.663557	0.600218
Myo5a:ENSMUST00000123128.7	0.627911	0.78822	0.813975	0.822846	0.799663	0.781771	0.790852	0.796467
Taok1:ENSMUST00000017435.10	0.707102	0.797556	0.828145	0.808775	0.811036	0.800159	0.799861	0.741063
Fam81a:ENSMUST00000034749.15	0.207701	0.415263	0.342652	0.325801	0.3981	0.409436	0.304243	0.283633
Sdf4:ENSMUST00000050078.12	0.0740132	0.213166	0.139706	0.217143	0.283668	0.314815	0.25227	0.174888
Tpm1:ENSMUST00000113690.7	0.487172	0.694523	0.621491	0.558294	0.683073	0.668713	0.615332	0.557367
Nipsnap1:ENSMUST00000038570.8	0.146552	0.370044	0.295833	0.237154	0.308017	0.358566	0.330537	0.181818
Fgf12:ENSMUST00000100024.2	0.106239	0.305495	0.239109	0.263086	0.310738	0.310025	0.292981	0.260326
Arfgef2:ENSMUST00000099078.9	0.657895	0.855172	0.841121	0.804348	0.822581	0.756757	0.827273	0.757576
Rcan2:ENSMUST00000044792.5	0.774524	0.947992	0.875764	0.915106	0.945116	0.943122	0.947686	0.877551
Hccs:ENSMUST00000033717.8	0.421488	0.598291	0.594595	0.555556	0.556701	0.636364	0.612245	0.507692
Clip1:ENSMUST00000111564.7	0.733333	0.885246	0.887218	0.886792	0.943396	0.921053	0.898551	0.881356
Tmem70:ENSMUST00000065373.5	0.371951	0.582192	0.580247	0.495283	0.535211	0.559322	0.520134	0.461538
Lnpep:ENSMUST00000041047.3	0.54023	0.741379	0.583333	0.658333	0.755396	0.736264	0.698997	0.731707
Dscaml1:ENSMUST00000034592.10	0.197183	0.320896	0.398119	0.41573	0.4625	0.278481	0.308725	0.446429
Cib2:ENSMUST00000041901.6	0.00229358	0.150943	0.265193	0.141643	0.153409	0.170909	0.157488	0.14486
Tpm3-rs7:ENSMUST00000072359.7	0.413706	0.511824	0.785959	0.494924	0.527778	0.56654	0.524173	0.628272
Fam3a:ENSMUST00000114143.9	0.152778	0.317829	0.2375	0.272727	0.45	0.415094	0.33945	0.166667
Tbrg4:ENSMUST00000189268.6	0.559524	0.768595	0.729412	0.716216	0.672727	0.744898	0.741497	0.644444
Klhl32:ENSMUST00000108214.8	0.0553911	0.185188	0.0869565	0.174311	0.192144	0.248783	0.263305	0.193871
Hnrnpul1:ENSMUST00000206832.1	0.5206	0.566716	0.577122	0.602836	0.500579	0.633819	0.534827	0.660982
Mapt:ENSMUST00000106992.9	0.53057	0.841958	0.648283	0.677373	0.68842	0.740167	0.722801	0.693813
Marchf5:ENSMUST00000024078.14	0.0985216	0.311078	0.223121	0.27412	0.325561	0.344001	0.278255	0.308746
Scrn1:ENSMUST00000019268.10	0.763417	0.948699	0.901316	0.909483	0.938215	0.955414	0.917577	0.908759
Pitpna:ENSMUST00000143219.7	0.43105	0.580126	0.580327	0.573251	0.609875	0.580705	0.54671	0.560623
Lysmd1:ENSMUST00000066386.5	0.587629	0.70068	0.834483	0.740741	0.73913	0.815789	0.738916	0.65
Zdhhc8:ENSMUST00000076957.6	0.0434783	0.0714286	0.448	0.367816	0.288136	0.158879	0.175532	0.136364
Ubfd1:ENSMUST00000033158.5	0.645914	0.882353	0.738636	0.713415	0.828571	0.843902	0.79351	0.793103
Cyrib:ENSMUST00000063838.10	0.224189	0.486772	0.351974	0.388278	0.32567	0.458484	0.370304	0.325714
Tmem19:ENSMUST00000219890.1	0.487638	0.757289	0.658876	0.585498	0.700524	0.726306	0.6519	0.514683
Cyria:ENSMUST00000069066.13	0.719628	0.934208	0.86802	0.831883	0.884023	0.900892	0.896921	0.83882
Fbxo31:ENSMUST00000059018.13	0.174174	0.450185	0.304598	0.263158	0.359788	0.357843	0.350685	0.285714
Slc36a4:ENSMUST00000115588.7	0.679012	0.907692	0.830986	0.795918	0.905882	0.79661	0.807339	0.8125
Terf2ip:ENSMUST00000052138.10	0.273947	0.483489	0.392121	0.390364	0.47761	0.409073	0.453188	0.404903
Neto1:ENSMUST00000058829.3	0.325183	0.487078	0.487194	0.482312	0.461245	0.538998	0.492659	0.46055
Atxn7l3b:ENSMUST00000099276.3	0.196016	0.422505	0.304803	0.287492	0.324804	0.314443	0.312942	0.28127
Cdc37l1:ENSMUST00000225210.1	0.587653	0.761364	0.760317	0.74319	0.72651	0.775071	0.741478	0.711815
Gdpd1:ENSMUST00000020804.7	0.688596	0.930939	0.850515	0.769231	0.862222	0.881279	0.802532	0.926606
Fads3:ENSMUST00000115995.3	0.193679	0.434761	0.252039	0.366553	0.359434	0.49718	0.406544	0.284028
Asrgl1:ENSMUST00000049948.5	0.183129	0.459032	0.287251	0.287861	0.349205	0.335227	0.357524	0.192251
Xiap:ENSMUST00000115094.7	0.929002	0.877621	0.881588	0.931551	0.881801	0.891872	0.913668	0.89165
Arl6ip1:ENSMUST00000032888.9	0.548303	0.782765	0.676631	0.705154	0.723275	0.714908	0.692999	0.650683
Erp44:ENSMUST00000030028.4	0.175213	0.247944	0.214926	0.254786	0.401047	0.410106	0.248719	0.29417
Cmc2:ENSMUST00000148235.7	0.127479	0.164704	0.221903	0.163209	0.17745	0.190447	0.19122	0.235018
Mxd4:ENSMUST00000042701.12	0.279815	0.478231	0.454609	0.409118	0.499316	0.437537	0.356973	0.350626
Coq4:ENSMUST00000028137.9	0.104193	0.214725	0.139071	0.239524	0.32271	0.403753	0.330121	0.299404
Ypel5:ENSMUST00000045174.6	0.461078	0.630303	0.558857	0.612903	0.611489	0.644958	0.593603	0.599466
Tmem65:ENSMUST00000072113.5	0.444947	0.576412	0.537411	0.53036	0.590763	0.566556	0.559377	0.572161
Dlat:ENSMUST00000034567.3	0.445812	0.628117	0.492705	0.523872	0.597656	0.598484	0.57684	0.491153
Pole3:ENSMUST00000030091.9	0.463158	0.652893	0.698276	0.677419	0.54023	0.636364	0.588235	0.729167
Kdm6b:ENSMUST00000094077.4	0.176901	0.319629	0.479626	0.29663	0.365328	0.260266	0.393319	0.322771
Nfyb:ENSMUST00000130911.7	0.360825	0.49777	0.503398	0.461273	0.484871	0.532926	0.476451	0.42248
Mbnl2:ENSMUST00000088419.12	0.222729	0.418143	0.385732	0.363848	0.331756	0.401979	0.384099	0.373673
Sesn3:ENSMUST00000208222.1	0.561067	0.823297	0.655216	0.728359	0.727817	0.74728	0.738195	0.605546
Shisa4:ENSMUST00000041240.3	0.413793	0.546875	0.594521	0.55122	0.531915	0.645161	0.608919	0.556701
Mul1:ENSMUST00000044058.10	0.116438	0.324201	0.293785	0.31875	0.27	0.323171	0.25817	0.219512
Pmpca:ENSMUST00000076431.12	0.513943	0.696085	0.660467	0.695272	0.649712	0.74725	0.680896	0.726011
Tigar:ENSMUST00000039913.8	0.633689	0.801529	0.697298	0.803208	0.809418	0.920191	0.798634	0.788119
Sap30bp:ENSMUST00000140991.1	0.282353	0.654545	0.427536	0.47619	0.333333	0.505155	0.38009	0.321429
Rab3gap2:ENSMUST00000069652.7	0.685919	0.688687	0.683186	0.586213	0.664396	0.659511	0.697486	0.650008
Ndufaf8:ENSMUST00000106223.3	0.00258398	0.224631	0.085906	0.182857	0.192399	0.186	0.188869	0.146875
Gna11:ENSMUST00000043604.5	0.425641	0.699454	0.608069	0.460265	0.553763	0.594828	0.586207	0.609929
Pafah1b2:ENSMUST00000172450.2	0.518889	0.798401	0.650785	0.657107	0.705605	0.686784	0.74256	0.655682
Ak1:ENSMUST00000113278.8	0.462145	0.710601	0.647679	0.593486	0.611878	0.624697	0.640501	0.608075
Ssbp2:ENSMUST00000004094.14	0.111498	0.334096	0.194078	0.26686	0.315347	0.30399	0.251686	0.261574
Dram2:ENSMUST00000067630.12	0.236164	0.377807	0.28865	0.359774	0.276953	0.423614	0.35238	0.23651
Ccdc47:ENSMUST00000002043.9	0.207027	0.337245	0.317802	0.293681	0.308116	0.393696	0.317759	0.311724
Camk2d:ENSMUST00000066466.12	0.305756	0.418474	0.420338	0.428174	0.409329	0.411701	0.434688	0.438978
Ints11:ENSMUST00000030901.8	0.107692	0.262295	0.340909	0.247525	0.309091	0.263158	0.322314	0.227273
Tma16:ENSMUST00000026681.6	0.0808466	0.283643	0.230302	0.252806	0.124868	0.30179	0.243286	0.215259
Ythdf2:ENSMUST00000152796.7	0.0454545	0.363636	0.211864	0.193548	0.218045	0.2	0.177419	0.157303
Ldb2:ENSMUST00000199534.4	0.462766	0.627841	0.769231	0.333333	1	0.661017	0.671569	0.571429
Crbn:ENSMUST00000013882.9	0.156636	0.370141	0.351281	0.301114	0.362479	0.352821	0.345007	0.254534
2810004N23Rik:ENSMUST00000034465.8	0.222222	0.416667	0.394366	0.384615	0.363636	0.4375	0.409091	0.333333
Klhl28:ENSMUST00000222508.1	0.440109	0.681664	0.548579	0.611725	0.590215	0.607344	0.631729	0.551724
Rexo2:ENSMUST00000217037.1	0.465649	0.705628	0.667925	0.625616	0.611111	0.608333	0.618123	0.632812
Ube2j1:ENSMUST00000124992.7	0.731707	0.942623	0.892683	0.851429	0.867925	0.924138	0.917883	0.904762
Glod4:ENSMUST00000017430.11	0.413205	0.690225	0.590352	0.572075	0.594991	0.574924	0.548211	0.523253
Tmem203:ENSMUST00000104998.4	0.0228443	0.248272	0.311561	0.176251	0.140774	0.125832	0.214108	0.183673
Rab10:ENSMUST00000021001.9	0.543221	0.777947	0.65187	0.694229	0.716921	0.758692	0.728652	0.701327
Nol3:ENSMUST00000014920.7	0.221401	0.494449	0.334369	0.358135	0.399993	0.360066	0.413706	0.259074
Rragd:ENSMUST00000098190.9	0.303025	0.538768	0.344201	0.53586	0.416915	0.479611	0.489623	0.399821
Rfk:ENSMUST00000025617.3	0.572634	0.835849	0.566478	0.72708	0.745274	0.762072	0.748188	0.738586
Celf6:ENSMUST00000118549.7	0.623686	0.828458	0.64961	0.700561	0.73407	0.808225	0.724549	0.678014
Klhl2:ENSMUST00000210166.1	0.666667	0.884892	0.865079	0.85	0.793103	0.690476	0.858896	0.830189
Ppih:ENSMUST00000056458.13	0	0.333333	0.308642	0.0277778	0.181818	0.106383	0.134454	0.09375
Fam193b:ENSMUST00000225240.2	0.547945	0.676471	0.826667	0.678161	0.708609	0.73494	0.713287	0.76087
Sfxn1:ENSMUST00000021930.9	0.195482	0.506433	0.349223	0.285678	0.404923	0.404146	0.384223	0.324777
Tdp2:ENSMUST00000038039.2	0.719073	0.901229	0.887337	0.853453	0.877633	0.905126	0.859605	0.819739
Gnaz:ENSMUST00000037813.4	0.254902	0.552632	0.426966	0.450549	0.440559	0.482051	0.400911	0.385965
Wdr37:ENSMUST00000176922.7	0.497519	0.763	0.538876	0.625475	0.796012	0.795123	0.604027	0.53257
Fgfr1op2:ENSMUST00000067404.12	0.721311	0.861751	0.890756	0.911504	0.948718	0.928571	0.92381	0.909091
Camk2g:ENSMUST00000100837.10	0.436782	0.710432	0.581481	0.523385	0.588942	0.669826	0.621094	0.518072
1600012H06Rik:ENSMUST00000052691.8	0.298969	0.487395	0.523256	0.509804	0.479452	0.472727	0.481752	0.34375
Trappc13:ENSMUST00000144060.7	0.239278	0.463604	0.336721	0.327855	0.351315	0.39731	0.389038	0.393555
Rnf128:ENSMUST00000113026.1	0.463918	0.764706	0.589286	0.515625	0.563218	0.747126	0.758621	0.573529
Tgoln1:ENSMUST00000070524.4	0.54563	0.83273	0.664874	0.675554	0.761823	0.747349	0.765162	0.660725
Snx13:ENSMUST00000048519.16	0.58209	0.745223	0.825	0.80303	0.786667	0.703125	0.759777	0.783784
Marchf7:ENSMUST00000102748.10	0.433735	0.625911	0.573952	0.609568	0.624094	0.564526	0.608961	0.543524
Ddx5:ENSMUST00000021062.11	0.461009	0.674717	0.608262	0.620178	0.633987	0.671692	0.684167	0.546083
Cggbp1:ENSMUST00000067744.7	0.600155	0.79337	0.738486	0.807235	0.798251	0.79078	0.773543	0.83184
Dnajb14:ENSMUST00000090178.9	0.604603	0.811153	0.779688	0.730719	0.817479	0.726429	0.785728	0.688097
Creg1:ENSMUST00000111432.9	0.243506	0.550725	0.356828	0.36478	0.42515	0.426829	0.450355	0.350365
Igf1:ENSMUST00000105300.8	0.395286	0.595274	0.51392	0.540967	0.530082	0.504319	0.543301	0.498602
Mapk8:ENSMUST00000111945.8	0.451015	0.622127	0.588694	0.61922	0.615351	0.659493	0.654789	0.65465
Sema4f:ENSMUST00000000641.14	0.722222	0.915789	0.904255	0.825397	0.929825	0.915254	0.945312	0.866667
Napg:ENSMUST00000025474.13	0.721154	0.8826	0.923077	0.886228	0.93722	0.941423	0.907662	0.888889
Cdc42:ENSMUST00000030417.9	0.342995	0.523236	0.572093	0.486726	0.512245	0.588235	0.525822	0.498721
Gid8:ENSMUST00000029090.8	0.140169	0.383619	0.315058	0.213054	0.35512	0.293066	0.332928	0.295154
Cpox:ENSMUST00000060077.6	0.231343	0.481865	0.309859	0.361345	0.386555	0.465517	0.452381	0.418182
Dnajc11:ENSMUST00000062904.10	0.414013	0.610092	0.52381	0.534653	0.544	0.63125	0.645283	0.617021
Chpf2:ENSMUST00000088295.8	0.284386	0.336928	0.727755	0.473743	0.514484	0.532559	0.381313	0.418579
Agbl3:ENSMUST00000115012.7	0.584906	0.714286	0.8125	0.746988	0.6	0.859649	0.843537	0.742857
Ehd1:ENSMUST00000025684.3	0.21685	0.391611	0.391596	0.323699	0.366359	0.438433	0.321353	0.328146
Chmp3:ENSMUST00000059462.11	0.314721	0.57346	0.55625	0.413333	0.434783	0.47541	0.537634	0.434783
Rtf2:ENSMUST00000029005.3	0.534884	0.802817	0.717105	0.755814	0.67619	0.688889	0.741573	0.619718
Lmbrd1:ENSMUST00000095062.9	0.534388	0.746079	0.695155	0.721405	0.759125	0.781422	0.723733	0.632234
Rnmt:ENSMUST00000009679.10	0.410853	0.59306	0.519481	0.516667	0.658333	0.682759	0.622222	0.607143
Appbp2:ENSMUST00000018625.9	0.337455	0.608796	0.519723	0.490482	0.471486	0.489901	0.543516	0.477766
Bfar:ENSMUST00000023365.12	0.244444	0.519174	0.380952	0.367232	0.386179	0.422222	0.474201	0.401961
Ncald:ENSMUST00000168992.7	0.345725	0.582759	0.451918	0.505582	0.609361	0.630868	0.540127	0.485333
Tsn:ENSMUST00000027623.8	0.170439	0.464506	0.294861	0.306795	0.379664	0.393283	0.374333	0.312155
Rgs2:ENSMUST00000127206.7	0.272204	0.44668	0.381398	0.337252	0.405694	0.414849	0.372992	0.307571
Cpsf6:ENSMUST00000176686.7	0.399487	0.640053	0.504211	0.546462	0.52591	0.666222	0.583737	0.484656
Elavl4:ENSMUST00000106598.7	0.122252	0.411094	0.264061	0.265035	0.314048	0.380647	0.282722	0.253605
Btf3l4:ENSMUST00000102742.10	0.172757	0.362805	0.375	0.330435	0.405622	0.45749	0.343936	0.276119
Gm20075:ENSMUST00000220449.1	0.161074	0.349057	0.355556	0.328488	0.404858	0.453061	0.326531	0.281481
Fam120b:ENSMUST00000055352.7	0.317647	0.529851	0.480315	0.486486	0.466667	0.541176	0.54067	0.461538
Ube2a:ENSMUST00000200835.3	0.253406	0.329004	0.545045	0.430052	0.468531	0.424837	0.481595	0.455357
Zfp322a:ENSMUST00000050101.8	0.209714	0.471906	0.290368	0.29647	0.394425	0.465635	0.37164	0.232883
Gtf2h1:ENSMUST00000006774.10	0.289256	0.497674	0.56391	0.436975	0.516484	0.44	0.495652	0.377049
Rnh1:ENSMUST00000210314.1	0.0505618	0.345588	0.266272	0.213592	0.269663	0.217742	0.210256	0.282051
Prpf4b:ENSMUST00000077853.4	0.392741	0.545589	0.481354	0.594255	0.574087	0.634121	0.497489	0.530425
Arglu1:ENSMUST00000048545.9	0.255368	0.312711	0.288523	0.311546	0.33284	0.332194	0.287526	0.305729
Macrod2:ENSMUST00000110064.7	0.402668	0.671397	0.512281	0.541115	0.643873	0.559049	0.547935	0.563596
Htt:ENSMUST00000080036.2	0.65493	0.812865	0.865285	0.921875	0.830769	0.886228	0.856338	0.841463
Pnrc2:ENSMUST00000030436.11	0.0681928	0.109492	0.10721	0.158483	0.129737	0.127517	0.133217	0.0814609
Gabrg2:ENSMUST00000070725.10	0.422619	0.692526	0.577507	0.536972	0.601771	0.698188	0.621139	0.589724
Idh3a:ENSMUST00000217484.1	0.230473	0.560847	0.314675	0.363167	0.40194	0.531116	0.430638	0.28
Tmem63c:ENSMUST00000131878.1	0.5625	0.766667	0.761905	0.857143	0.808511	0.85	0.708333	0.652174
Cmip:ENSMUST00000166750.8	0.442682	0.706415	0.640411	0.662295	0.627625	0.698495	0.671308	0.633944
Leprotl1:ENSMUST00000033910.8	0.545166	0.816681	0.772034	0.745384	0.758073	0.82569	0.747538	0.645882
Syt4:ENSMUST00000025110.4	0.349624	0.637547	0.527443	0.499132	0.549576	0.584567	0.592553	0.52549
Gsk3b:ENSMUST00000023507.12	0.290505	0.48996	0.434371	0.393369	0.40667	0.443368	0.429538	0.398933
Rac1:ENSMUST00000080537.13	0.670455	0.904762	0.856153	0.832998	0.884211	0.881057	0.870809	0.822695
Uri1:ENSMUST00000085513.5	0.388625	0.585377	0.50118	0.537261	0.601766	0.581408	0.543414	0.444315
Hnrnpa3:ENSMUST00000111962.7	0.247455	0.500964	0.430655	0.428384	0.56591	0.551237	0.437218	0.433882
Ublcp1:ENSMUST00000102795.3	0.547262	0.725655	0.758221	0.625584	0.760653	0.784053	0.739368	0.661525
2610002M06Rik:ENSMUST00000120722.1	0.420744	0.720454	0.578564	0.542753	0.649971	0.674864	0.649188	0.599762
Gabra4:ENSMUST00000031121.9	0.302326	0.602564	0.406977	0.467213	0.674419	0.581395	0.515789	0.458333
Cntnap2:ENSMUST00000114641.7	0.170393	0.332739	0.450448	0.355308	0.573784	0.648626	0.353515	0.512863
Cox10:ENSMUST00000049091.8	0.39604	0.72619	0.571429	0.472222	0.652174	0.634409	0.524752	0.558824
Fbxo42:ENSMUST00000030757.9	0.679245	0.910448	0.918919	0.714286	0.779661	0.95082	0.875	0.95
Kcna1:ENSMUST00000055168.4	0.202844	0.503488	0.298905	0.313435	0.396498	0.491559	0.372218	0.151989
Ypel2:ENSMUST00000018571.4	0.54491	0.782051	0.8	0.782609	0.710145	0.702128	0.666667	0.625
Dtna:ENSMUST00000221880.1	0.202703	0.383085	0.39726	0.52	0.379747	0.477477	0.405263	0.238095
Cdkn2aipnl:ENSMUST00000102763.4	0.595506	0.875	0.842105	0.698795	0.714286	0.813559	0.784211	0.744186
Irf2bpl:ENSMUST00000038422.7	0.161905	0.41453	0.313043	0.290503	0.331776	0.395604	0.373134	0.363636
Serbp1:ENSMUST00000042990.6	0.0522327	0.188996	0.105992	0.127596	0.140449	0.151706	0.111205	0.131455
Tmem167b:ENSMUST00000090546.5	0.633333	0.856354	0.84	0.809524	0.852459	0.831325	0.811594	0.862745
Cwc22:ENSMUST00000111821.8	0	0.221239	0.227273	0.0652174	0.224138	0.241935	0.194915	0.2
Rab1a:ENSMUST00000020358.11	0.129464	0.42801	0.254438	0.249453	0.275689	0.463895	0.314678	0.291339
Oscp1:ENSMUST00000035497.4	0.159385	0.407107	0.30257	0.318066	0.300254	0.423076	0.285259	0.23334
Surf4:ENSMUST00000015011.9	0.531365	0.775734	0.68837	0.702935	0.72782	0.758688	0.745626	0.597107
Ddost:ENSMUST00000030538.4	0.276094	0.564593	0.441281	0.445498	0.43787	0.615942	0.477454	0.424242
Sh3glb1:ENSMUST00000198254.4	0.387347	0.487652	0.554424	0.511435	0.586908	0.6102	0.515169	0.499452
Pacsin1:ENSMUST00000232437.1	0.2341	0.537548	0.424091	0.334489	0.375424	0.454083	0.408353	0.308265
Nsa2:ENSMUST00000073456.8	0.056	0.466472	0.0442478	0.14433	0.144928	0.204545	0.207547	0.1875
Terf2:ENSMUST00000133925.7	0.454545	0.697095	0.664	0.673684	0.682353	0.617886	0.62439	0.704545
Ube2l3:ENSMUST00000232139.1	0.310352	0.499343	0.571442	0.463277	0.560073	0.571463	0.476002	0.403673
Psen2:ENSMUST00000111106.7	0.445946	0.712871	0.648148	0.661765	0.615385	0.68	0.647959	0.518519
Anp32e:ENSMUST00000165307.7	0.652942	0.894767	0.841595	0.787027	0.836454	0.867667	0.821429	0.79542
Gdap1:ENSMUST00000026879.7	0.510587	0.779711	0.686838	0.692367	0.721092	0.70258	0.74156	0.633517
Eapp:ENSMUST00000161592.7	0.286713	0.642512	0.324324	0.462366	0.585586	0.535354	0.423423	0.409836
Grb2:ENSMUST00000106499.7	0.532354	0.751288	0.675931	0.688048	0.790596	0.758371	0.720014	0.662224
Pdpk1:ENSMUST00000102927.9	0.365472	0.665094	0.544813	0.510295	0.516303	0.64476	0.587131	0.604027
Sod2:ENSMUST00000007012.5	0.0828018	0.342144	0.208986	0.206908	0.363811	0.388375	0.308037	0.203522
Nup50:ENSMUST00000165443.3	0.578931	0.866318	0.73408	0.739396	0.795467	0.842441	0.726412	0.711115
Pdgfa:ENSMUST00000046901.13	0.00124098	0.222326	0.189035	0.166644	0.197331	0.156075	0.182799	0.166855
Cand1:ENSMUST00000020315.12	0.238474	0.455833	0.419555	0.45768	0.449561	0.533746	0.496963	0.446752
Zbtb11:ENSMUST00000050248.8	0.596154	0.784	0.868421	0.902778	0.827586	0.666667	0.804054	0.857143
Bbs4:ENSMUST00000026265.7	0.466216	0.731844	0.631068	0.62	0.652174	0.719697	0.705382	0.638889
Nmt2:ENSMUST00000081932.12	0.633247	0.89759	0.804749	0.878009	0.882317	0.744451	0.891424	0.943079
Rala:ENSMUST00000009003.8	0.236776	0.608994	0.349237	0.34329	0.468966	0.393559	0.418423	0.373066
Micos13:ENSMUST00000052832.5	0.00451213	0.246246	0.206508	0.198692	0.251606	0.204	0.21612	0.186885
Rbmx:ENSMUST00000098470.8	0.261341	0.377945	0.455487	0.497577	0.488634	0.424604	0.400567	0.439392
Sms:ENSMUST00000112529.7	0.611354	0.842779	0.805556	0.811224	0.823789	0.863636	0.82716	0.727273
Dpp10:ENSMUST00000112606.7	0.34375	0.655405	0.512195	0.57563	0.55	0.522293	0.558003	0.54321
Pcsk2:ENSMUST00000028905.9	0.328571	0.579787	0.381295	0.539474	0.566667	0.509804	0.538462	0.545455
Rab6a:ENSMUST00000107048.7	0.308605	0.627016	0.464793	0.473905	0.565091	0.567718	0.488433	0.491866
Sugt1:ENSMUST00000054908.9	0.0789637	0.166383	0.147638	0.148674	0.243315	0.24129	0.16179	0.22674
Pde1a:ENSMUST00000102655.9	0.599523	0.755212	0.707744	0.54104	0.52901	0.718092	0.74076	0.743048
Cds2:ENSMUST00000103181.10	0.663601	0.668923	0.990071	0.983019	0.960947	0.918012	0.966816	0.897638
Ncbp2:ENSMUST00000023460.6	0.538867	0.721141	0.726527	0.72481	0.705473	0.762091	0.670624	0.758833
Rab14:ENSMUST00000028238.14	0.162364	0.587255	0.345188	0.274881	0.403196	0.475027	0.369596	0.300791
Me3:ENSMUST00000032856.12	0.0425532	0.333333	0.295238	0.147727	0.175141	0.328244	0.314286	0.222222
Rabgef1:ENSMUST00000119797.7	0.677966	0.92	0.876923	0.942857	0.878788	0.913793	0.868421	0.923077
Trip12:ENSMUST00000027421.12	0.386361	0.618304	0.639183	0.549185	0.605912	0.704911	0.522767	0.545896
Ccdc97:ENSMUST00000002683.2	0.681818	0.910828	0.885057	0.923077	0.927536	0.904762	0.895522	0.826087
Bpnt1:ENSMUST00000027916.12	0.575472	0.840541	0.790541	0.712418	0.869565	0.777174	0.77135	0.770833
Trappc5:ENSMUST00000044857.3	0.241497	0.631579	0.403727	0.423313	0.445255	0.491525	0.415638	0.382022
Fam3c:ENSMUST00000165576.7	0.0737705	0.334601	0.227273	0.231579	0.356522	0.33871	0.266112	0.346154
Csnk1a1:ENSMUST00000165123.7	0.24416	0.579649	0.363213	0.449642	0.488211	0.561374	0.469667	0.429404
Oxct1:ENSMUST00000110690.8	0.413594	0.70448	0.610573	0.5675	0.642741	0.643255	0.658742	0.539759
Bicral:ENSMUST00000040624.6	0.363636	0.592308	0.61194	0.539683	0.512821	0.623762	0.6	0.521739
Nudt19:ENSMUST00000040962.5	0.42402	0.628386	0.6625	0.633436	0.670295	0.658163	0.631836	0.671698
Pcgf1:ENSMUST00000165164.8	0	0.280899	0.25	0.111111	0.219512	0.135135	0.218487	0.375
Tmem87b:ENSMUST00000110325.7	0.278687	0.371169	0.312	0.33611	0.326876	0.409661	0.402748	0.380462
Gabrb1:ENSMUST00000031122.8	0.153519	0.397595	0.273248	0.252901	0.326438	0.339615	0.427357	0.259602
Snx12:ENSMUST00000077876.3	0.11	0.312925	0.364341	0.295775	0.431818	0.329268	0.302752	0.282051
Clip4:ENSMUST00000024854.8	0.217742	0.527363	0.4	0.393064	0.340633	0.48538	0.533066	0.368421
Arl16:ENSMUST00000076921.6	0.213904	0.389163	0.465517	0.419753	0.508671	0.47929	0.418048	0.544643
Spin1:ENSMUST00000095797.5	0.656908	0.908867	0.880689	0.898207	0.91895	0.931614	0.919152	0.836212
Cd2bp2:ENSMUST00000166791.7	0.555753	0.793248	0.814309	0.71365	0.82352	0.800955	0.752391	0.803021
Ubl4a:ENSMUST00000155676.7	0.41349	0.620219	0.704467	0.646154	0.71123	0.70297	0.57971	0.548611
Atpaf1:ENSMUST00000176047.7	0.260274	0.521368	0.362205	0.507812	0.576923	0.525714	0.478469	0.33871
Sec22b:ENSMUST00000029476.8	0.373984	0.697802	0.459259	0.544643	0.609756	0.745614	0.576087	0.534483
Armc8:ENSMUST00000185524.6	0.189873	0.511364	0.36	0.426471	0.424242	0.419355	0.4	0.409091
Slc25a51:ENSMUST00000107796.7	0.408602	0.724324	0.609244	0.606557	0.653659	0.686391	0.604215	0.527132
Pigk:ENSMUST00000159899.7	0.461905	0.726852	0.642308	0.633094	0.697095	0.763158	0.733871	0.555556
Tmem33:ENSMUST00000037918.11	0.300296	0.618639	0.481544	0.438756	0.58659	0.630579	0.572849	0.480185
Rfxap:ENSMUST00000044373.5	0.173333	0.35865	0.415205	0.365714	0.478873	0.464516	0.415704	0.344828
Calm3:ENSMUST00000019514.9	0.425249	0.747907	0.729114	0.659254	0.677762	0.7398	0.710438	0.63428
Ankrd29:ENSMUST00000118525.8	0.0829268	0.412935	0.269663	0.254386	0.312757	0.327044	0.321429	0.21519
Nrip1:ENSMUST00000121927.7	0.0476666	0.451065	0.193333	0.290847	0.3317	0.332909	0.303211	0.357776
Pnisr:ENSMUST00000098238.8	0.249376	0.467386	0.476601	0.49973	0.451072	0.515842	0.506964	0.503374
Derl2:ENSMUST00000143850.7	0.163462	0.477778	0.37	0.38961	0.44898	0.477273	0.397163	0.23913
Golga3:ENSMUST00000112512.7	0.105263	0.328163	0.198047	0.30591	0.334653	0.361681	0.2672	0.40197
Get4:ENSMUST00000026976.11	0.236162	0.444444	0.6	0.369863	0.473214	0.507576	0.486239	0.405941
Clcn4:ENSMUST00000000619.7	0.287561	0.647436	0.460637	0.410989	0.506329	0.543033	0.549462	0.459364
Lrrc58:ENSMUST00000078717.6	0.316644	0.599043	0.458094	0.424648	0.440337	0.452146	0.485643	0.493378
Actr10:ENSMUST00000021479.5	0.0525814	0.354394	0.215972	0.276779	0.284737	0.328461	0.313792	0.163632
Synj2bp:ENSMUST00000163402.7	0.108054	0.312671	0.406799	0.379844	0.394986	0.423237	0.258949	0.260135
Rwdd4a:ENSMUST00000033973.13	0.442343	0.809507	0.675725	0.708656	0.760466	0.746473	0.651728	0.666453
Flad1:ENSMUST00000129308.8	0.0430761	0.177491	0.157186	0.152475	0.232656	0.143309	0.156002	0.135864
Gpd2:ENSMUST00000169687.7	0.340993	0.528055	0.43203	0.403974	0.456508	0.511218	0.476854	0.421839
Plp1:ENSMUST00000033800.12	0.430407	0.667663	0.75746	0.77378	0.649915	0.56157	0.657417	0.628963
Tmem126b:ENSMUST00000032843.8	0.401089	0.738954	0.545164	0.614066	0.658787	0.654418	0.599203	0.669669
Sec63:ENSMUST00000019937.4	0.21142	0.385285	0.488759	0.391527	0.476765	0.522182	0.530987	0.381167
Dcaf12l1:ENSMUST00000115056.1	0.460317	0.769231	0.687117	0.692308	0.669118	0.680851	0.701818	0.716049
Slc25a16:ENSMUST00000044977.9	0.345238	0.650485	0.606061	0.454545	0.657895	0.553846	0.588889	0.597222
Rgma:ENSMUST00000119206.2	0.161538	0.210066	0.552239	0.78125	0.777778	0.9	0.790323	0.273684
Lpcat1:ENSMUST00000022099.14	0.590909	0.855814	0.846939	0.877778	0.847458	0.789474	0.817857	0.804348
Csnk2a1:ENSMUST00000099224.9	0.501292	0.785883	0.774589	0.686495	0.778124	0.721923	0.707022	0.648212
Pa2g4:ENSMUST00000026425.12	0.280732	0.532334	0.550594	0.510063	0.583031	0.531487	0.57905	0.433917
Cdo1:ENSMUST00000035804.8	0.534884	0.826667	0.774194	0.850746	0.822222	0.757143	0.76087	0.75
Mark3:ENSMUST00000084953.12	0.0982382	0.100935	0.109652	0.106499	0.0863845	0.100322	0.0987812	0.120372
Ensa:ENSMUST00000058230.12	0.599057	0.688963	0.885789	0.919837	0.877919	0.854342	0.863046	0.831804
Retreg1:ENSMUST00000022881.14	0.242118	0.543304	0.555946	0.424362	0.481537	0.521522	0.488612	0.521718
Mblac2:ENSMUST00000057598.6	0.13253	0.605263	0.285088	0.303644	0.439114	0.537143	0.341969	0.24
Sorbs1:ENSMUST00000226047.1	0.141414	0.533074	0.342657	0.298913	0.392638	0.439614	0.366906	0.426357
Rbbp6:ENSMUST00000098062.8	0.236559	0.452128	0.55102	0.488789	0.561728	0.593985	0.427152	0.417582
Tial1:ENSMUST00000106226.8	0.395553	0.691912	0.630863	0.575136	0.627244	0.71084	0.675249	0.63462
Blzf1:ENSMUST00000027866.10	0.286511	0.356002	0.364559	0.407939	0.422848	0.336446	0.354075	0.353554
Cbx5:ENSMUST00000118152.7	0.395323	0.608535	0.393201	0.465202	0.637672	0.596957	0.521652	0.486251
Rhoa:ENSMUST00000007959.13	0.231111	0.53605	0.466258	0.451777	0.530864	0.428571	0.50173	0.490909
Rab11a:ENSMUST00000169058.7	0.414894	0.754595	0.563204	0.646588	0.688669	0.682244	0.673069	0.633835
Fubp1:ENSMUST00000200524.4	0.149254	0.464567	0.436893	0.363636	0.408163	0.538462	0.290323	0.44186
Syn2:ENSMUST00000169345.3	0.47275	0.788913	0.719695	0.659799	0.692633	0.765681	0.720388	0.642546
Plpp6:ENSMUST00000045674.3	0.583333	0.892308	0.84127	0.852459	0.814815	0.927273	0.785714	0.916667
Slc25a1:ENSMUST00000003622.15	0.597561	0.853659	0.955556	0.945455	0.857143	0.833333	0.847134	0.804878
Gng2:ENSMUST00000160013.7	0.464907	0.736342	0.563185	0.595448	0.620919	0.672299	0.640336	0.591664
Zfp24:ENSMUST00000066497.11	0.163508	0.401986	0.266339	0.284148	0.322549	0.376636	0.28499	0.221912
Nudt21:ENSMUST00000034204.10	0.183563	0.502186	0.373641	0.398087	0.451076	0.546865	0.436786	0.37383
Amd1:ENSMUST00000099945.5	0.215355	0.52573	0.444004	0.379922	0.554776	0.627664	0.47096	0.426392
Cbln2:ENSMUST00000068423.9	0.270677	0.62	0.4	0.580247	0.420561	0.8	0.372549	0.525591
Exoc3:ENSMUST00000035934.6	0.327524	0.61439	0.555804	0.614378	0.605249	0.574873	0.571583	0.599397
Reep5:ENSMUST00000006027.6	0.549105	0.864607	0.761633	0.762488	0.845159	0.853925	0.832788	0.724837
Mtif2:ENSMUST00000020749.12	0.0175439	0.259615	0.32	0.268657	0.393443	0.230769	0.314286	0.214286
Nmt1:ENSMUST00000021314.7	0.453237	0.79902	0.730769	0.682927	0.751553	0.798246	0.728522	0.481928
Hspa13:ENSMUST00000114244.1	0.158091	0.553875	0.362234	0.242912	0.288887	0.402363	0.450882	0.372989
Mtpn:ENSMUST00000031866.8	0.51594	0.85974	0.841725	0.867805	0.845965	0.813952	0.833235	0.824499
Serpini1:ENSMUST00000029423.8	0.612635	0.891986	0.878543	0.875787	0.90483	0.932157	0.892736	0.842975
Commd7:ENSMUST00000071852.9	0.00682594	0.257143	0.46134	0.223301	0.310127	0.203008	0.195431	0.235669
Usp14:ENSMUST00000092096.13	0.209945	0.538732	0.413146	0.423913	0.572368	0.566667	0.48855	0.357143
St13:ENSMUST00000172107.7	0.327309	0.473194	0.475521	0.448399	0.485995	0.513815	0.462851	0.401853
Stxbp6:ENSMUST00000053768.13	0.319333	0.668971	0.857143	0.686083	0.553093	0.703649	0.595057	0.584447
Creg2:ENSMUST00000053355.5	0.411142	0.748898	0.665416	0.50636	0.599427	0.72906	0.737071	0.577726
Fip1l1:ENSMUST00000113536.7	0.294118	0.579399	0.56213	0.575	0.522936	0.568627	0.609023	0.626506
Arf6:ENSMUST00000050063.8	0.0978723	0.531646	0.282209	0.342105	0.427586	0.447552	0.340782	0.265306
Srpk1:ENSMUST00000130643.8	0.22807	0.572816	0.504274	0.545455	0.528736	0.48	0.472362	0.47619
Inpp1:ENSMUST00000027271.8	0.0864092	0.180824	0.150731	0.143841	0.2267	0.21345	0.183917	0.171753
Spock1:ENSMUST00000185502.6	0.48816	0.820025	0.688976	0.74171	0.783522	0.798956	0.817121	0.716981
Haus1:ENSMUST00000236234.1	0	0.245098	0.322581	0.280374	0.402778	0.373333	0.193277	0.291667
Eid2b:ENSMUST00000094651.3	0.313949	0.649962	0.685215	0.586441	0.604802	0.522398	0.724262	0.704554
Tmed10:ENSMUST00000040766.8	0.230219	0.4554	0.532533	0.463429	0.454967	0.49157	0.492714	0.388231
Arhgap1:ENSMUST00000111329.7	0.595745	0.876471	0.903226	0.923077	0.929577	0.892857	0.852941	0.853659
Bag4:ENSMUST00000038498.9	0.377998	0.684323	0.594665	0.663529	0.672537	0.722775	0.626275	0.658404
G3bp2:ENSMUST00000167918.7	0.234994	0.635367	0.437337	0.445687	0.49931	0.573973	0.533749	0.453297
Wdr12:ENSMUST00000027173.14	0.031379	0.110968	0.164927	0.105716	0.11981	0.126857	0.116915	0.134866
Plcxd3:ENSMUST00000061925.4	0.149533	0.602804	0.538462	0.244898	0.439633	0.48	0.383966	0.2
Rbfox1:ENSMUST00000056416.8	0.202436	0.565279	0.532601	0.435727	0.555192	0.535757	0.49937	0.414546
Taok3:ENSMUST00000092889.11	0.156499	0.326913	0.250152	0.278263	0.32165	0.345788	0.314065	0.264634
Kcnd2:ENSMUST00000081542.5	0.295155	0.637639	0.616861	0.54946	0.60921	0.598027	0.650908	0.579384
Cops2:ENSMUST00000110463.7	0.214815	0.572626	0.537143	0.540146	0.536232	0.527778	0.477495	0.578947
Chl1:ENSMUST00000066905.8	0.419359	0.783862	0.76234	0.733666	0.719354	0.748798	0.763187	0.727157
Abhd18:ENSMUST00000203892.1	0.349915	0.28964	0.2674	0.303123	0.313464	0.32791	0.300153	0.239809
Ddah1:ENSMUST00000029845.14	0.0737935	0.521991	0.200378	0.173913	0.3594	0.508903	0.363186	0.299934
Eif1ax:ENSMUST00000087143.6	0.16105	0.483199	0.398714	0.461944	0.576416	0.607643	0.48878	0.406195
Rab39b:ENSMUST00000033545.5	0.320424	0.704842	0.541053	0.551393	0.613937	0.627578	0.631497	0.491625
Cdk7:ENSMUST00000091299.7	0.359523	0.752583	0.454761	0.690259	0.750816	0.710381	0.736318	0.6
Dpysl3:ENSMUST00000121805.8	0.47619	0.907051	0.666667	0.6	0.8125	0.790123	0.784367	0.6875
Mbd2:ENSMUST00000074058.10	0.0208333	0.356164	0.364583	0.434783	0.265823	0.425287	0.362903	0.333333
Nr2f2:ENSMUST00000032768.14	0.205966	0.434536	0.438014	0.377876	0.401599	0.221279	0.390864	0.418664
Isoc1:ENSMUST00000025503.9	0.125942	0.613577	0.381618	0.394292	0.421351	0.516211	0.492341	0.389706
Rpp38:ENSMUST00000062672.6	0.454545	0.801075	0.878151	0.833333	0.811475	0.758929	0.768977	0.769912
Erlec1:ENSMUST00000073192.13	0.0948639	0.2837	0.252628	0.270482	0.297095	0.317143	0.294886	0.212146
Acsl6:ENSMUST00000093106.11	0.268657	0.709877	0.592857	0.656863	0.636364	0.627049	0.585714	0.5
Ykt6:ENSMUST00000002818.8	0.336538	0.689895	0.712329	0.725352	0.738095	0.732824	0.714286	0.492308
Ssr3:ENSMUST00000029414.11	0.45122	0.738916	0.814516	0.856115	0.798319	0.877551	0.862745	0.763158
Cnot11:ENSMUST00000161515.7	0.320652	0.787914	0.595238	0.658476	0.757143	0.716667	0.691721	0.580051
Uqcrc2:ENSMUST00000033176.6	0.00345622	0.405567	0.498069	0.259542	0.390892	0.451613	0.320245	0.424561
AI593442:ENSMUST00000213937.1	0.297027	0.711665	0.588721	0.619833	0.721211	0.720735	0.641025	0.58038
Actb:ENSMUST00000100497.10	0.214941	0.782326	0.559289	0.459308	0.593872	0.676956	0.572692	0.486111
Tmsb15b2:ENSMUST00000069803.4	0	0.448454	0.383178	0.380435	0.357143	0.448598	0.392157	0.416667
Hopx:ENSMUST00000120827.8	0.010989	0.477501	0.463565	0.649609	0.733333	0.391791	0.315534	0.560209
Kras:ENSMUST00000111710.7	0.287587	0.615778	0.3874	0.445215	0.49804	0.495894	0.465314	0.387585
Nap1l1:ENSMUST00000219961.1	0	0.43617	0.308411	0.494253	0.433333	0.339623	0.517241	0.198413
Ttc14:ENSMUST00000099153.9	0.222019	0.329471	0.274211	0.294813	0.324529	0.329739	0.258055	0.234858
Pdcd4:ENSMUST00000025931.13	0.00904977	0.460938	0.722772	0.423077	0.706667	0.62963	0.430851	0.631579
Utp11:ENSMUST00000030738.7	0.0621762	0.185324	0.0754581	0.174261	0.143775	0.158078	0.178935	0.155871
Sdha:ENSMUST00000022062.7	0.00253485	0.53937	0.503356	0.424483	0.57351	0.61631	0.538933	0.546742
Fcor:ENSMUST00000159364.2	0.0911108	0.176681	0.121053	0.105569	0.133769	0.0875994	0.135357	0.139991
Mgll:ENSMUST00000113585.8	0.271054	0.494548	0.355159	0.29318	0.355402	0.45477	0.396038	0.345745
Rbm8a:ENSMUST00000198027.4	0.0452987	0.195705	0.156387	0.171526	0.183527	0.212885	0.188642	0.176332
Aup1:ENSMUST00000092618.8	0.00480769	0.663507	0.713568	0.450331	0.681159	0.694915	0.546713	0.593023
Tmsb15l:ENSMUST00000127404.7	0	0.81865	0.736619	0.754447	0.747159	0.818607	0.791444	0.793561
Chmp4b:ENSMUST00000044277.9	0.00224215	0.785592	0.711055	0.63807	0.82732	0.782051	0.728497	0.710526
Fdx1:ENSMUST00000034552.7	0	0.401926	0.338376	0.294153	0.318963	0.365272	0.380168	0.301638
Rab8a:ENSMUST00000003121.8	0	0.836614	0.820585	0.685303	0.778601	0.852859	0.746867	0.838407
Dynlt2b:ENSMUST00000080316.7	0	0.936275	0.857143	0.729282	0.719008	0.821705	0.859848	0.659574
Tsc1:ENSMUST00000028155.11	0	0.865285	0.918367	0.811111	0.891566	0.905263	0.831461	0.818182
Mt1:ENSMUST00000034215.7	0.0077821	0.983713	0.98741	0.926174	0.982609	0.984353	0.942974	0.939252
Txnl1:ENSMUST00000025476.3	0.325069	0.64	0.206897	0.228571	0.365979	0.537383	0.469729	0.307692
Klf6:ENSMUST00000000080.7	0.131313	0.411985	0.129032	0.10687	0.136752	0.233503	0.184885	0.173469
Lancl1:ENSMUST00000027149.11	0.125541	0.424419	0.146512	0.159383	0.228571	0.35	0.204633	0.0964467
Slc8a1:ENSMUST00000234131.1	0.51027	0.544379	0.31882	0.323756	0.477014	0.455898	0.484963	0.352484
Wdfy1:ENSMUST00000113512.7	0.544544	0.822635	0.59382	0.536384	0.660958	0.654586	0.594323	0.525034
Dclk1:ENSMUST00000199585.4	0.390678	0.681849	0.399523	0.557546	0.610601	0.526064	0.389207	0.461606
Scrg1:ENSMUST00000034023.3	0.208333	0.456	0.246914	0.277778	0.625	0.4	0.2	0
Fam114a2:ENSMUST00000020831.12	0.258824	0.482558	0.34715	0.263158	0.226415	0.28866	0.313253	0.296875
Wdr18:ENSMUST00000045247.8	0.0637774	0.268938	0.157564	0.0725964	0.0804069	0.181482	0.119208	0.0683699
Ccdc184:ENSMUST00000031914.5	0.720238	0.941176	0.674157	0.580645	0.65	0.840256	0.870662	0.635135
Lamp2:ENSMUST00000074913.11	0.589286	0.84507	0.615385	0.603448	0.640625	0.84	0.693694	0.657895
Chid1:ENSMUST00000153191.7	0.18411	0.235529	0.172399	0.137934	0.16202	0.156734	0.234117	0.216658
Imp4:ENSMUST00000027303.13	0.2684	0.437005	0.350091	0.151931	0.268164	0.330155	0.289062	0.277029
Strap:ENSMUST00000064910.6	0.393171	0.612973	0.410358	0.477998	0.483393	0.459864	0.484793	0.470275
Ank1:ENSMUST00000084038.10	0.633129	0.847431	0.711717	0.769852	0.750946	0.636737	0.767517	0.592522
Dcun1d1:ENSMUST00000178098.7	0.299916	0.422752	0.249983	0.273307	0.326948	0.369897	0.349083	0.256875
Umad1:ENSMUST00000159335.7	0.183099	0.333333	0.198113	0.111111	0.0555556	0.205882	0.2	0.222222
Slc35f6:ENSMUST00000062962.11	0.353659	0.553719	0.414286	0.382353	0.455696	0.409091	0.38843	0.344828
Sdc2:ENSMUST00000022871.6	0.694503	0.790242	0.659514	0.721975	0.682287	0.792016	0.695598	0.674614
Mrps5:ENSMUST00000028852.12	0.229412	0.378109	0.19403	0.148148	0.207407	0.362069	0.216102	0.197368
Ccdc127:ENSMUST00000022063.13	0.219175	0.310632	0.284938	0.243894	0.266207	0.311504	0.239434	0.219401
Hacd2:ENSMUST00000061156.9	0.206894	0.370653	0.230569	0.233842	0.229215	0.23997	0.194262	0.178519
Tubb2b:ENSMUST00000075774.4	0.129805	0.30211	0.122754	0.14892	0.195602	0.207207	0.181736	0.191358
Snx6:ENSMUST00000005798.8	0.229167	0.372093	0.207547	0.216216	0.170213	0.202703	0.262673	0.288136
Ccn3:ENSMUST00000050027.8	0.240977	0.366462	0.221278	0.258415	0.200416	0.2405	0.218636	0.210044
Prkaa2:ENSMUST00000030243.7	0.377588	0.576	0.412081	0.380034	0.479504	0.535537	0.482424	0.43257
Clpb:ENSMUST00000001884.13	0.383919	0.533219	0.362718	0.45459	0.445674	0.428479	0.461174	0.389673
Dcaf12:ENSMUST00000030145.8	0.659681	0.790993	0.625632	0.605859	0.699212	0.668312	0.611921	0.621895
Nicn1:ENSMUST00000035227.7	0.55665	0.755102	0.527578	0.595238	0.618132	0.664179	0.660939	0.655556
Cd3eap:ENSMUST00000047036.9	0.248309	0.459512	0.32055	0.285301	0.324169	0.371526	0.376952	0.289352
Cbx8:ENSMUST00000026663.7	0.0879121	0.276923	0.176471	0.128205	0.179487	0.285714	0.125	0.047619
Hbegf:ENSMUST00000025363.6	0.468531	0.617788	0.495146	0.506329	0.419355	0.516854	0.445652	0.576923
Abhd6:ENSMUST00000166497.8	0.166646	0.291459	0.22602	0.212753	0.293046	0.267605	0.232687	0.248432
Usp13:ENSMUST00000072312.11	0.449137	0.568724	0.483025	0.404227	0.40636	0.465067	0.450304	0.400919
Gtf3c2:ENSMUST00000088010.11	0.29589	0.448398	0.385915	0.415296	0.404476	0.293634	0.353291	0.333545
Vps53:ENSMUST00000056601.10	0.0930233	0.248619	0.177778	0.135135	0.060241	0.142857	0.136126	0.0298507
Fyttd1:ENSMUST00000023489.10	0.503559	0.688846	0.544855	0.560439	0.479402	0.562417	0.560727	0.60711
Vma21:ENSMUST00000114577.7	0.629662	0.779074	0.597836	0.640284	0.722029	0.729088	0.660261	0.596851
Tprkb:ENSMUST00000113753.7	0.325	0.518868	0.35426	0.367021	0.472441	0.49	0.41954	0.358025
Adipor2:ENSMUST00000032272.12	0.736364	0.906863	0.769231	0.814286	0.860759	0.846154	0.753333	0.692308
Tfip11:ENSMUST00000031288.13	0.66129	0.891089	0.787879	0.666667	0.79661	0.79661	0.807407	0.791667
Cnih4:ENSMUST00000134115.7	0.389381	0.570881	0.48855	0.39604	0.507463	0.510638	0.41	0.409091
Apba2:ENSMUST00000032732.14	0.212885	0.321086	0.195556	0.219436	0.186111	0.16934	0.209924	0.201031
Ubxn4:ENSMUST00000027592.5	0.394799	0.52575	0.368716	0.419508	0.436337	0.442298	0.414959	0.350526
Snrnp35:ENSMUST00000031349.8	0.0438091	0.20498	0.0463973	0.0333203	0.0128249	0.106175	0.0549934	0.118787
Ttl:ENSMUST00000035812.13	0.571429	0.673684	0.441379	0.524823	0.660131	0.56051	0.549296	0.573529
Fam160a2:ENSMUST00000179474.8	0.351985	0.546438	0.448723	0.459072	0.425238	0.495554	0.444006	0.340211
Cpsf2:ENSMUST00000047357.9	0.15964	0.263596	0.275319	0.248996	0.252082	0.200381	0.215093	0.168501
Zc3h14:ENSMUST00000110104.9	0.558333	0.650485	0.532847	0.525926	0.592	0.52	0.520979	0.444444
Pik3ip1:ENSMUST00000045153.10	0.790323	0.89759	0.847826	0.733333	0.8125	0.74359	0.780864	0.730159
Gdap1l1:ENSMUST00000109420.9	0.264449	0.392063	0.358138	0.259259	0.311838	0.326197	0.327479	0.231127
Skp1:ENSMUST00000037324.11	0.277737	0.467374	0.36166	0.325824	0.379247	0.373207	0.382417	0.325382
Yipf5:ENSMUST00000025364.5	0.141734	0.189518	0.0837553	0.0906111	0.132353	0.130178	0.181329	0.0925587
Mark2:ENSMUST00000032557.14	0.516854	0.68239	0.60274	0.571429	0.48	0.586207	0.619444	0.533333
Anapc1:ENSMUST00000014499.9	0.561623	0.723065	0.673091	0.632748	0.629697	0.526965	0.620976	0.737425
Cab39l:ENSMUST00000022553.5	0.719101	0.751825	0.736842	0.576087	0.583333	0.660714	0.604762	0.714286
Calb1:ENSMUST00000029876.1	0.0441159	0.216198	0.032091	0.0966838	0.12032	0.140013	0.12631	0.0598687
Cisd2:ENSMUST00000029815.7	0.492298	0.633759	0.500072	0.50611	0.554411	0.537714	0.584921	0.459695
Zc3h11a:ENSMUST00000191896.5	0.423611	0.591696	0.534188	0.425	0.450216	0.562044	0.483986	0.530864
Zfp385b:ENSMUST00000111830.8	0.363636	0.497619	0.393617	0.314961	0.493333	0.410256	0.411429	0.391892
Ddx25:ENSMUST00000034612.6	0.0596491	0.20122	0.0701754	0.0660377	0.153153	0.141026	0.137755	0.1
Slc6a6:ENSMUST00000032185.8	0.545972	0.697374	0.487974	0.61175	0.596508	0.683112	0.566743	0.624461
Stau2:ENSMUST00000159558.7	0.521008	0.640327	0.506438	0.497608	0.621212	0.563934	0.530364	0.5
Rpl22:ENSMUST00000139685.7	0.280665	0.198467	0.290244	0.349544	0.375	0.332536	0.27191	0.238971
Cep170:ENSMUST00000057037.12	0.286813	0.280798	0.2749	0.386938	0.439726	0.507713	0.396472	0.386326
Tnks2:ENSMUST00000025729.11	0.847563	0.943616	0.981969	0.970224	0.919088	0.913656	0.962388	0.943542
Galnt17:ENSMUST00000086023.11	0.163825	0.0578806	0.111082	0.272965	0.199105	0.15389	0.109319	0.132041
Homer1:ENSMUST00000079086.7	0.340132	0.277638	0.398142	0.361965	0.388577	0.414387	0.353929	0.439431
Zfp971:ENSMUST00000108926.2	0.158124	0.140971	0.312874	0.457057	0.192978	0.241232	0.326041	0.301853
Tmem181a:ENSMUST00000232383.1	0.673469	0.671053	0.798387	0.7625	0.917808	0.814815	0.812865	0.777778
Alg11:ENSMUST00000072572.12	0.742815	0.829752	0.838504	0.853878	0.928571	0.915493	0.909026	0.899424
Itm2b:ENSMUST00000022704.8	0.424206	0.276682	0.386957	0.389769	0.433948	0.35088	0.341718	0.418831
Slc45a4:ENSMUST00000151288.7	0.363636	0.311594	0.385965	0.442308	0.45625	0.496644	0.479769	0.53125
Gm14419:ENSMUST00000126358.7	0.15625	0.0481928	0.208333	0.0806452	0.218182	0.271186	0.181373	0.241379
Pias1:ENSMUST00000098651.5	0.589854	0.58505	0.759869	0.779194	0.793103	0.715485	0.769523	0.714737
Wscd2:ENSMUST00000094452.3	0.138191	0.0496623	0.32723	0.424865	0.147135	0.193832	0.182027	0.122196
Ldlrad4:ENSMUST00000063775.4	0.159667	0.124569	0.591038	0.227539	0.0689655	0.167282	0.149564	0.298322
Gm14419:ENSMUST00000108975.8	0.704663	0.622696	0.824405	0.639474	0.675182	0.579251	0.555365	0.768362
Ntn3:ENSMUST00000024931.5	0.34385	0.485176	0.533663	0.504268	0.486639	0.507149	0.415564	0.509308
Ppp1r14c:ENSMUST00000043374.6	0.52809	0.592857	0.716738	0.626506	0.686567	0.5125	0.530581	0.508197
Tmem14c:ENSMUST00000021790.6	0.322222	0.404145	0.512	0.327273	0.388889	0.34434	0.314667	0.506024
Trim9:ENSMUST00000167755.2	0.40708	0.429508	0.597938	0.443182	0.493506	0.521739	0.418699	0.4
Dgke:ENSMUST00000107894.7	0.598867	0.646551	0.748825	0.639393	0.6397	0.627706	0.650182	0.64863
Ube2q1:ENSMUST00000038356.12	0.414634	0.422951	0.598837	0.450292	0.524691	0.466667	0.433333	0.540984
Coa5:ENSMUST00000027286.6	0.669565	0.705674	0.87619	0.798165	0.791946	0.820896	0.653226	0.829787
Dynlt1f:ENSMUST00000179554.2	0.759118	0.797477	0.792782	0.786533	0.814928	0.784861	0.788823	0.778281
Phactr1:ENSMUST00000148891.7	0.515957	0.617347	0.66843	0.498856	0.526316	0.525	0.474614	0.575221
Gfod1:ENSMUST00000055341.6	0.676429	0.638688	0.701114	0.661075	0.678404	0.636238	0.6551	0.593076
Pcnx:ENSMUST00000021567.5	0.781321	0.801217	0.936197	0.758227	0.78845	0.774449	0.803771	0.860946
Mprip:ENSMUST00000116371.7	0.108108	0.155039	0.290323	0.210191	0.2	0.153439	0.137324	0.204082
Trnt1:ENSMUST00000057578.15	0.699029	0.768786	0.90566	0.783019	0.827273	0.776471	0.783784	0.836364
Snx7:ENSMUST00000029639.11	0.25	0.224138	0.395745	0.45098	0.403846	0.27451	0.170213	0.318182
Selenok:ENSMUST00000112268.2	0.415177	0.339474	0.513629	0.415525	0.422797	0.425854	0.358278	0.436074
Chchd10:ENSMUST00000219839.1	0.381083	0.352266	0.506944	0.385621	0.426432	0.396	0.327245	0.468213
Rundc3a:ENSMUST00000107105.8	0.546751	0.538822	0.682107	0.63913	0.555556	0.520772	0.537729	0.68323
Mrpl40:ENSMUST00000023391.15	0.335329	0.434978	0.508264	0.381974	0.413636	0.399083	0.4	0.401709
Pnmal1:ENSMUST00000038163.7	0.839074	0.90032	0.93577	0.890768	0.947018	0.937306	0.908562	0.93211
Zmat2:ENSMUST00000001419.9	0.0638246	0.0763812	0.0861836	0.109881	0.103181	0.109054	0.0896595	0.0836229
Klf13:ENSMUST00000183817.1	0.264615	0.39899	0.448276	0.282828	0.333333	0.371951	0.316143	0.327586
Ppme1:ENSMUST00000032963.9	0.371886	0.344106	0.471655	0.325333	0.406332	0.351738	0.364465	0.450704
Ctnnd2:ENSMUST00000081728.6	0.300547	0.290309	0.436338	0.42214	0.412856	0.331298	0.306797	0.32633
Polr3k:ENSMUST00000039551.8	0.184125	0.200295	0.207168	0.231117	0.249147	0.24549	0.184879	0.181238
Eef1a2:ENSMUST00000055990.7	0.270613	0.240567	0.40551	0.258716	0.331966	0.348982	0.23591	0.259037
Tnpo2:ENSMUST00000166592.1	0.609467	0.615873	0.708333	0.630252	0.635036	0.587302	0.558935	0.619718
Map4:ENSMUST00000169851.7	0.421958	0.41687	0.400077	0.403853	0.430283	0.434047	0.438891	0.406134
Pde4d:ENSMUST00000120664.7	0.790693	0.822737	0.764073	0.799146	0.793264	0.808641	0.811823	0.811069
Bcl7a:ENSMUST00000031391.8	0.686869	0.735369	0.572848	0.576355	0.70438	0.659218	0.637931	0.669492
Ccnh:ENSMUST00000164127.7	1	0.975155	0.842593	0.857143	0.825397	0.925926	0.989583	0.857143
Nrd1:ENSMUST00000065977.10	0.0892329	0.140369	0.074861	0.174606	0.228041	0.116629	0.164145	0.157206
Zfp444:ENSMUST00000108567.8	0.14722	0.273404	0.0859915	0.157836	0.24082	0.27939	0.184549	0.148048
Tm9sf3:ENSMUST00000025989.9	0.56949	0.562193	0.47449	0.554407	0.636505	0.637187	0.550492	0.542329
Rtn1:ENSMUST00000078505.13	0.357051	0.37091	0.229176	0.33249	0.373795	0.348195	0.323623	0.312212
Kif3c:ENSMUST00000020999.6	0.647202	0.625683	0.525126	0.577869	0.662404	0.650602	0.662866	0.661972
Kcmf1:ENSMUST00000068697.10	0.189394	0.261044	0.0740741	0.116667	0.148438	0.188235	0.182796	0.243243
Snx16:ENSMUST00000099223.10	0.255472	0.387403	0.236775	0.343218	0.262096	0.338983	0.393869	0.34082
Scarb2:ENSMUST00000031377.8	0.810256	0.925764	0.775362	0.890805	0.934307	0.950192	0.902314	0.794521
Cnot8:ENSMUST00000108843.7	0.740741	0.906977	0.705521	0.839286	0.88	0.890909	0.863309	0.821429
Agps:ENSMUST00000047232.13	0.259615	0.216606	0.0934579	0.326531	0.298246	0.361111	0.132231	0.217391
AI854703:ENSMUST00000154570.1	0.648148	0.753968	0.555556	0.615385	0.660194	0.833333	0.762238	0.636364
Rcan3:ENSMUST00000030606.13	0.907514	0.978495	0.780645	0.945455	0.916667	0.986014	0.933333	0.9375
Nos1ap:ENSMUST00000160456.7	0.913209	0.910986	0.751781	0.924336	0.842826	0.77063	0.869671	0.914947
Psmd12:ENSMUST00000021063.12	0.433442	0.401119	0.260054	0.482051	0.417683	0.435294	0.45	0.363636
Maneal:ENSMUST00000064444.7	0.884298	0.947552	0.741573	0.933884	0.930769	0.907975	0.897281	0.953846
Hlf:ENSMUST00000004051.7	0.38936	0.547025	0.497089	0.599783	0.583789	0.478657	0.456568	0.360326
Mfap1a:ENSMUST00000089926.5	0.253994	0.31407	0.177326	0.318525	0.351408	0.319039	0.300912	0.272805
Ppp2r2d:ENSMUST00000041097.12	0.69145	0.678191	0.412791	0.654206	0.751037	0.739583	0.722326	0.578431
9330159F19Rik:ENSMUST00000092627.5	0.229745	0.38398	0.34404	0.551377	0.422635	0.447712	0.361305	0.369872
Dpysl5:ENSMUST00000114729.7	0.611111	0.60698	0.649635	0.804124	0.668539	0.584416	0.527687	0.507576
Camk2n1:ENSMUST00000050918.3	0.278481	0.245119	0.239549	0.396696	0.215	0.2413	0.21435	0.250162
Dlgap2:ENSMUST00000133298.7	0.32849	0.350963	0.393438	0.337831	0.301641	0.271631	0.234883	0.252444
Cacng2:ENSMUST00000019290.2	0.495073	0.430144	0.436536	0.313655	0.411838	0.446174	0.406235	0.374645
Gm45623:ENSMUST00000210744.1	0.842105	0.875	0.855731	0.717742	0.916667	0.895833	0.762712	0.846154
Ece1:ENSMUST00000102518.9	0.857143	0.944444	0.924242	0.78125	0.893939	0.96875	0.919753	0.944444
Mpv17l:ENSMUST00000128757.7	0.233942	0.299167	0.285435	0.240139	0.290857	0.290956	0.254639	0.294498
Caskin1:ENSMUST00000024958.8	0.625359	0.671469	0.675803	0.528803	0.654728	0.669461	0.665655	0.657975
Peli3:ENSMUST00000025834.14	0.886076	0.96063	0.85	0.724138	0.846154	0.940476	0.87619	0.901961
Mlec:ENSMUST00000112121.5	0.737119	0.782695	0.686279	0.555988	0.792444	0.826443	0.717753	0.789755
Ctdspl:ENSMUST00000073109.11	0.282609	0.22069	0.31405	0.104	0.381818	0.4	0.326667	0.26087
Vps11:ENSMUST00000034644.9	0.262136	0.282353	0.294118	0.0963855	0.308642	0.282353	0.292135	0.491228
Vip:ENSMUST00000019906.5	0.819149	0.917431	0.833333	0.698113	0.902439	0.935484	0.817391	0.915637
Panx1:ENSMUST00000164273.8	0.0638298	0.136	0.0972222	0.16129	0.379747	0.162162	0.0813008	0.08
Golga7b:ENSMUST00000122375.7	0.508197	0.614583	0.604278	0.526667	0.740741	0.656863	0.496403	0.480769
Ebag9:ENSMUST00000227691.1	0.410706	0.523609	0.457296	0.434247	0.482108	0.46097	0.542021	0.495241
Jmjd6:ENSMUST00000047616.9	0.0946746	0.0289855	0.0294118	0.0531915	0.204819	0.025641	0.0409357	0.0555556
Samd4b:ENSMUST00000208199.1	0.436551	0.436399	0.441826	0.485233	0.391294	0.464816	0.421585	0.403984
Kif3a:ENSMUST00000120613.8	0.492014	0.542064	0.50622	0.507321	0.591196	0.535373	0.51546	0.646045
Rnf157:ENSMUST00000100202.9	0.88123	0.916211	0.900098	0.901727	0.930974	0.90045	0.909729	0.917086
Rbx1:ENSMUST00000023036.6	0.305278	0.288106	0.33821	0.393952	0.429183	0.388716	0.348276	0.369528
Ube2g1:ENSMUST00000021148.12	0.14536	0.214759	0.164558	0.168577	0.27142	0.164439	0.185896	0.184931
Ube2k:ENSMUST00000142407.7	0.134519	0.224953	0.204473	0.214391	0.323051	0.259513	0.20481	0.192814
Mpg:ENSMUST00000020528.13	0.369155	0.336012	0.272807	0.313832	0.306831	0.516312	0.287114	0.233464
U2surp:ENSMUST00000079659.11	0.352163	0.48352	0.595583	0.4954	0.58179	0.714977	0.487856	0.523553
Mmp17:ENSMUST00000031390.9	0.0900901	0.0723684	0.0827586	0.107143	0.122449	0.263736	0.0841424	0.0677966
Csf2ra:ENSMUST00000076046.6	0.287037	0.332432	0.299087	0.345528	0.483333	0.517857	0.393617	0.402597
Gm14327:ENSMUST00000108935.7	0.387714	0.218007	0.280795	0.13494	0.132088	0.332141	0.174851	0.19751
Tbpl1:ENSMUST00000127698.7	0.508333	0.607477	0.585062	0.516667	0.643836	0.721519	0.55477	0.476636
Metap2:ENSMUST00000047910.14	0.270378	0.310741	0.25255	0.272268	0.334655	0.436148	0.266724	0.394607
Fh1:ENSMUST00000027810.13	0.0726257	0.158537	0.0890411	0.0949367	0.126437	0.244898	0.200873	0.0277778
Alad:ENSMUST00000107444.7	0.0173697	0.0792683	0.0473373	0.0348837	0.0283688	0.167939	0.100346	0.0326797
Hapln4:ENSMUST00000007738.10	0.335891	0.424931	0.429927	0.475057	0.445634	0.54013	0.44675	0.43744
Krt222:ENSMUST00000103132.9	0.714791	0.769219	0.788712	0.723905	0.831514	0.863205	0.789054	0.768893
B230217C12Rik:ENSMUST00000155954.2	0.127119	0.182058	0.172241	0.212291	0.173333	0.291803	0.19468	0.148515
Znrf1:ENSMUST00000171182.7	0.232589	0.303032	0.280239	0.24334	0.348844	0.362949	0.224744	0.250336
Gmps:ENSMUST00000029405.7	0.403954	0.684165	0.672053	0.71195	0.729776	0.659317	0.691355	0.619854
Adipor1:ENSMUST00000027727.14	0.344155	0.357093	0.327745	0.356353	0.346709	0.429627	0.365436	0.342415
Ndfip2:ENSMUST00000181969.7	0.491492	0.581885	0.566815	0.579113	0.583469	0.631509	0.579068	0.55926
Psma4:ENSMUST00000034848.13	0.716738	0.779006	0.737882	0.796875	0.653731	0.635514	0.759099	0.680272
Zrsr2:ENSMUST00000090840.9	0.152475	0.179831	0.177501	0.154938	0.211747	0.183534	0.192564	0.146412
Fnbp1l:ENSMUST00000239148.1	0.88172	0.893617	0.88843	0.941176	0.848	0.747126	0.833333	0.795699
Elavl1:ENSMUST00000098950.5	0.636165	0.814226	0.738102	0.714696	0.712465	0.78103	0.788503	0.71105
Senp7:ENSMUST00000089362.8	0.428571	0.404412	0.308824	0.428571	0.537037	0.438596	0.58209	0.419355
Gm11007:ENSMUST00000178120.7	0.178435	0.193066	0.218522	0.280851	0.212842	0.218778	0.25189	0.1572
Snrk:ENSMUST00000118886.8	0.421212	0.514563	0.405622	0.483146	0.471014	0.418773	0.57513	0.425
Gm2007:ENSMUST00000178133.7	0.1774	0.192061	0.217009	0.279883	0.211806	0.217748	0.249765	0.161064
Slc49a4:ENSMUST00000023554.8	0.15886	0.204361	0.178824	0.280432	0.318178	0.254251	0.195111	0.256598
Aars:ENSMUST00000034441.7	0.385084	0.348344	0.404255	0.403189	0.334025	0.365741	0.490196	0.431535
Magi1:ENSMUST00000089317.11	0.262949	0.326297	0.320697	0.392452	0.317578	0.347351	0.359925	0.270768
Calcoco1:ENSMUST00000023818.10	0.0463576	0.0985915	0.0128205	0.0645161	0.113208	0.213333	0.187845	0.0294118
Echs1:ENSMUST00000026538.12	0.738532	0.860606	0.788546	0.773913	0.807107	0.87037	0.895899	0.669903
Miga1:ENSMUST00000073089.12	0.665449	0.748919	0.720813	0.509462	0.692397	0.729267	0.760827	0.754922
Slc25a27:ENSMUST00000024705.5	0.361224	0.389009	0.412417	0.360305	0.431937	0.46748	0.341169	0.306845
B3galt1:ENSMUST00000112346.2	0.904762	0.940741	0.840909	0.909091	0.945946	0.961538	0.807339	1
Erc1:ENSMUST00000183703.7	0.588785	0.596364	0.674074	0.681818	0.615385	0.603448	0.470968	0.651163
Gm14288:ENSMUST00000123863.1	0.739069	0.60277	0.71199	0.555633	0.696332	0.667823	0.521395	0.593471
Vkorc1l1:ENSMUST00000051758.10	0.720147	0.783781	0.64492	0.663464	0.724997	0.775625	0.674354	0.727589
Cox5b:ENSMUST00000081180.6	0.00311311	0.0822705	0.125847	0.0921967	0.16486	0.105154	0.0441119	0.184623
Zcchc17:ENSMUST00000134159.2	0.802317	0.767355	0.782443	0.778609	0.720902	0.737632	0.783196	0.688066
Mtln:ENSMUST00000135091.1	0.971047	0.938628	0.905386	0.894737	0.83871	0.82735	0.923219	0.764398
Zfp2:ENSMUST00000109129.7	0.24597	0.303502	0.290673	0.274078	0.318094	0.28451	0.309282	0.179321
Pcdh9:ENSMUST00000195826.5	0.731258	0.723457	0.696016	0.760906	0.708848	0.732428	0.686561	0.508694
Ehd3:ENSMUST00000024860.8	0.762431	0.841478	0.759494	0.75	0.773585	0.838235	0.791667	0.603261
