# Supplementary material for: Infernape uncovers cell type–specific and spatially resolved alternative polyadenylation in the brain
Source: HighWire-hosted journal article supplement (doi:10.1101/gr.277864.123), 2023-10-01
Supplement: Supplemental_Tables.zip [file Supplemental_Table_S18.xlsx]

## Sheet: annotation for TEGLU TEINH
Annotation for TEGLU and TEINH cell clusters
Source: Zeisel A, Hochgerner H, Lonnerberg P, Johnsson A, Memic F, van der Zwan J, Haring M, Braun E, Borm LE, La Manno G et al. 2018. Molecular Architecture of the Mouse Nervous System. Cell 174: 999-1014 e1022.
	ClusterName	n	TaxonomyRank4	region	Likely location	Marker genes
1	TEGLU10	866	Telencephalon projecting excitatory neurons	Cortex	Cortical pyramidal layer 5	Hs3st2 Vipr1 Pde1a	Excitatory neurons, cerebral cortex
2	TEGLU11	1464	Telencephalon projecting excitatory neurons	Cortex	Cortical pyramidal (poor markers)	Igfbp6 C130074G19Rik	Excitatory neurons, cerebral cortex
3	TEGLU17	784	Telencephalon projecting excitatory neurons	Cortex	Piriform pyramidal	Trim54 Slc30a3 Lmo3	Excitatory neurons, cerebral cortex
4	TEGLU18	657	Telencephalon projecting excitatory neurons	Cortex	Anterior olfactory nucleus, deep layer	Abi3bp 4930426D05Rik Ndst4 Klhl14 Rgs14	Excitatory neurons, cerebral cortex
5	TEGLU3	2734	Telencephalon projecting excitatory neurons	Cortex	Cortex pyramidal layer 6	Rprm Rell1	Excitatory neurons, cerebral cortex
6	TEGLU4	664	Telencephalon projecting excitatory neurons	Cortex	Cortex pyramidal layer 5, Cingulate/Retrosplenial area (superficial and deep)	Fezf2 RP24-134N2.1 Kcng1	Excitatory neurons, cerebral cortex
7	TEGLU6	598	Telencephalon projecting excitatory neurons	Cortex	Cingulate/Retrosplenial area, layer 2	Tshz2 Ddit4l	Excitatory neurons, cerebral cortex
8	TEGLU7	2435	Telencephalon projecting excitatory neurons	Cortex	Cortical pyramidal layer 2/3	A830009L08Rik Gm12371 Lamp5	Excitatory neurons, cerebral cortex
9	TEGLU8	3071	Telencephalon projecting excitatory neurons	Cortex	Cortical pyramidal layer 4	Krt12 Tcap	Excitatory neurons, cerebral cortex
10	TEINH10	581	Telencephalon inhibitory interneurons	Hippocampus,Cortex	Hippocampus (sr/slm),Cortex	Yjefn3 Hdhd3 Npas1	R-LM border Cck interneurons, cortex/hippocampus
11	TEINH11	660	Telencephalon inhibitory interneurons	Hippocampus,Cortex	Hippocampus (sr/slm),Cortex	Col19a1 Slc17a8	R-LM border Cck interneurons, cortex/hippocampus
12	TEINH15	1069	Telencephalon inhibitory interneurons	Hippocampus,Cortex	Hippocampus,Cortex	Npy Ptchd2	CGE-derived neurogliaform cells, cortex/hippocampus
13	TEINH16	644	Telencephalon inhibitory interneurons	Hippocampus,Cortex	Hippocampus,Cortex	Lhx6 Pde11a	Ivy and MGE-derived neurogliaform cells, cortex/hippocampus
14	TEINH17	675	Telencephalon inhibitory interneurons	Hippocampus,Cortex	Hippocampus,Cortex	Pthlh Cox6a2	Axo-axonic, cortex/hippocampus
15	TEINH18	547	Telencephalon inhibitory interneurons	Hippocampus,Cortex	Hippocampus,Cortex	Rbp4 Cox6a2 Cort	Basket and bistratified cells, cortex/hippocampus
16	TEINH19	1040	Telencephalon inhibitory interneurons	Hippocampus,Cortex	Hippocampus (so),Cortex	Sst Ccna1	Hippocamposeptal projection, cortex/hippocampus
17	TEINH4	645	Telencephalon inhibitory interneurons	Hippocampus,Cortex	Hippocampus,Cortex	Vip Gm17750 Cxcl14	Interneuron-selective interneurons, cortex/hippocampus
